# Supplementary material for: Unbiased proteomics, histochemistry, and mitochondrial DNA copy number reveal better mitochondrial health in muscle of high-functioning octogenarians
Source: eLife. 2022 Apr 11;11:e74335. doi: 10.7554/eLife.74335 (PMC9090325; doi:10.7554/eLife.74335)
Supplement: Figure 3—figure supplement 2—source data 1. [file elife-74335-fig3-figsupp2-data1.xlsx]

## Sheet: Porin 100
		Porin 8th July				Porin 9th August				Porin 26th Sept
Blot	Sample	Tubulin	Porin	Porin Normalised to Tubulin	Normalised to 100	Tubulin	Porin	Porin Normalised to Tubulin	Normalised to 100	Tubulin	Porin	Porin Normalised to Tubulin	Normalised to 100		Average Porin
1	MA01	1197037	22170680	18.5213	37.6562	814553	7643823	9.38407	12.7804	10224729	6961592	0.680858	29.5863	MA01	26.6743
1	MA02	883529	22601918	25.5814	52.0104	772577	8633898	11.1755	15.2201	13264080	5058996	0.381406	16.5738	MA02	27.9347
1	MAC15	2224782	33791236	15.1886	30.8803	1.2518e+06	10377523	8.29011	11.2905	14785974	10590440	0.716249	31.1242	MAC15	24.4317
1	MA05	1270229	30084732	23.6845	48.1537	508212	11172069	21.9831	29.9392	9946446	8792311	0.883965	38.4122	MA05	38.835
1	MAC16	1429333	26355504	18.439	37.4889	713367	12207173	17.112	23.3052	12197385	9207465	0.754872	32.8025	MAC16	31.1989
1	MA06	2203286	23889534	10.8427	22.0446	1.13683e+06	6934116	6.09953	8.30708	18371842	7.20548e+06	0.392202	17.0429	MA06	15.7982
1	MAC11	2961974	20359988	6.87379	13.9753	1.02475e+06	6013176	5.86797	7.9917	18597804	4411744	0.237219	10.3082	MAC11	10.7584
1	MA04	3044645	20435248	6.71187	13.6461	992986	6505192	6.55114	8.92213	16599189	5.09515e+06	0.306952	13.3384	MA04	11.9689
1	MAC12	1322333	34494900	26.0864	53.0371	1.10353e+06	11070913	10.0323	13.6631	13834098	9236227	0.667642	29.012	MAC12	31.9041
1	MA03	3737148	28833560	7.71539	15.6864	3.48767e+06	9726940	2.78895	3.79833	18588188	5938556	0.31948	13.8828	MA03	11.1225
1	MAC17	1054923	21605804	20.4809	41.6404	838806	11663503	13.9049	18.9374	9691663	4331378	0.446918	19.4206	MAC17	26.6661
1	MA08	1090196	26421876	24.2359	49.2747	515680	11183133	21.6862	29.5349	7.73653e+06	5.64035e+06	0.729054	31.6806	MA08	36.8301
2	MAC25	1000113	21086328	21.0839	42.8664	444612	10065880	22.6397	30.8335	15067866	9693784	0.643342	27.956	MAC25	33.8853
2	MA07	2368353	34418420	14.5326	29.5468	1.28102e+06	20522130	16.0202	21.8182	18163604	15990850	0.880379	38.2564	MA07	29.8738
2	MAC31	2657780	20532276	7.72535	15.7066	1.36768e+06	13257141	9.69319	13.2014	23982548	12241958	0.510453	22.1814	MAC31	17.0298
2	MA10	3009560	29109960	9.6725	19.6655	1.43125e+06	22395276	15.6473	21.3104	21837714	14274770	0.653675	28.4051	MA10	23.127
2	MAC30	3018420	29705322	9.84135	20.0087	1.09216e+06	16732915	15.321	20.8659	22640658	12348989	0.545434	23.7015	MAC30	21.5254
2	MA09	3154295	39057944	12.3825	25.1752	956582	22055852	23.0569	31.4017	14222206	15207679	1.06929	46.4654	MA09	34.3474
2	MAC26	3677855	32807456	8.92027	18.1361	1069338	18127886	16.9524	23.0879	28982922	11877334	0.409805	17.8078	MAC26	19.6773
2	MA13	3926009	36233444	9.22908	18.7639	994674	17238298	17.3306	23.6029	22196676	15700402	0.707331	30.7367	MA13	24.3678
2	MAC27	2291283	28039936	12.2377	24.8808	964007	15438706	16.0151	21.8113	17819570	13204197	0.740994	32.1995	MAC27	26.2972
2	MA14	3258062	34678228	10.6438	21.6403	1.19042e+06	16541381	13.8954	18.9244	22686712	15337393	0.676052	29.3775	MA14	23.314
2	MAC29	2883011	25393006	8.80781	17.9074	726589	14150087	19.4747	26.523	21362054	12756329	0.597149	25.9488	MAC29	23.4597
2	MA21	355570	17488790	49.1852	100		11716837			3399764	7.82374e+06	2.30126	100	MA21	100
3	MAC28	5015211	36133384	7.20476	14.6482	663130	18802740	28.3545	38.6166	12140878	8433523	0.694639	30.1851	MAC28	27.8166
3	MA18	4647636	23914256	5.14547	10.4614	1.16096e+06	19402876	16.7127	22.7614	15080770	7.83446e+06	0.5195	22.5746	MA18	18.5991
3	MAC32	2803331	19572112	6.98173	14.1948	683163	16754622	24.5251	33.4012	12192693	4895706	0.401528	17.4482	MAC32	21.6814
3	MA19		29633128			382025	28050488	73.4257	100	9548322	6826380	0.71493	31.0669	MA19	65.5334
3	MA20	6729877	23863572	3.54592	7.20931	1.50409e+06	13842708	9.2034	12.5343	15154715	5338065	0.352238	15.3063	MA20	11.6833
3	MA33	5891425	33225062	5.63956	11.466	921961	19053880	20.6667	28.1464	14050897	6105051	0.434495	18.8808	MA33	19.4977
3	MAC22									2.05283e+06	2814844	1.3712	59.5848	MAC22	59.5848
Porin Controls		Porin Athletes
ID	Porin	ID	Porin
MAC15	24.4317	MA05	38.835		MAC15	24.4317	M
MAC16	31.1989	MA06	15.7982		MAC16	31.1989	M
MAC11	10.7584	MA04	11.9689		MAC11	10.7584	F
MAC12	31.9041	MA03	11.1225		MAC12	31.9041	M
MAC17	26.6661	MA08	36.8301		MAC17	26.6661	F
MAC25	33.8853	MA07	29.8738		MAC25	33.8853	F
MAC31	17.0298	MA10	23.127		MAC31	17.0298	M
MAC30	21.5254	MA09	34.3474		MAC30	21.5254	M
MAC26	19.6773	MA13	24.3678		MAC26	19.6773	F
MAC27	26.2972	MA14	23.314		MAC27	26.2972	M
MAC29	23.4597	MA21	100		MAC29	23.4597	M
MAC28	27.8166	MA18	18.5991		MAC28	27.8166	M
MAC32	21.6814	MA19	65.5334		MAC32	21.6814	F
MAC22	59.5848	MA20	11.6833		MAC22	59.5848	F
		MA33	19.4977
Average	26.8512		30.9932			Males	25.4579	17-32
SD	11.2524		22.9115			Females	28.7089	10 to 60
Range	10 to 60

## Sheet: OXPHOS mean of control
		8th July	OXPHOS					OXPHOS					Normalised to av of control					2nd Oct	OXPHOS					ETC Subunits					Normalised to av of control							Average							Normalised to av of control
Sample	Blot	Porin	CV	CIII	CIV	CII	CI	CV	CIII	CIV	CII	CI	CV	CIII	CIV	CII	CI	Porin	CV	CIII	CIV	CII	CI	CV	CIII	CIV	CII	CI	CV	CIII	CIV	CII	CI					CV	CIII	CIV	CII	CI	CV	CIII	CIV	CII	CI	CV	CIII
MA01	1	22170680	20142192	8946357	611059	8480542	1312225	0.908506	0.403522	0.0275616	0.382512	0.0591874	1.1832	1.51822	0.550908	1.78075	0.560521	6961592	2.53964e+06	6.73399e+06	3.63989e+06	16790546	15672478	0.364808	0.967306	0.522854	2.41188	2.25128	0.803946	0.539303		3.74223	2.51901	MA01	1	MA01	1	0.993573	1.02876	0.550908	2.76149	1.53977	1.03332	1.02876	0.550908	2.76149	1.53977	FALSE	FALSE
MA02	1	22601918	27034928	9393828	771671	5336245	1330009	1.19613	0.415621	0.0341418	0.236097	0.058845	1.5578	1.56374	0.682436	1.09913	0.557278	5058996	4416032	6.49012e+06	478633	7.20298e+06	7389798	0.872907	1.28289	0.0946102	1.4238	1.46072	1.92367	0.715249		2.20914	1.63444	MA02	1	MA02	1	1.74073	1.1395	0.682436	1.65413	1.09586	1.81036	1.1395	0.682436	1.65413	1.09586	FALSE	FALSE
MAC15	1	33791236	32148238	6921964	1207130	6026278	1639559	0.951378	0.204845	0.0357232	0.178338	0.0485202	1.23903	0.770713	0.714045	0.830242	0.4595	10590440	1.63867e+06	8965361		7599321	11209014	0.154731	0.846552		0.717564	1.05841	0.34099	0.471979		1.11336	1.18428	MAC15	0	MAC15	0	0.790012	0.621346	0.714045	0.971801	0.82189	0.821613	0.621346	0.714045	0.971801	0.82189	0.821613	0.621346
MA05	1	30084732	15166853	4981683	1450446	4445274	1194571	0.504138	0.165588	0.048212	0.147758	0.0397069	0.656568	0.623014	0.963675	0.687879	0.376035	8792311	825371	4274556	584017	4920743	6.21288e+06	0.0938742	0.48617	0.0664236	0.559664	0.706626	0.206875	0.271055		0.868365	0.790661	MA05	1	MA05	1	0.431722	0.447034	0.963675	0.778122	0.583348	0.448991	0.447034	0.963675	0.778122	0.583348	FALSE	FALSE
MAC16	1	26355504	18197398	5973648	1512051	4619457	1605953	0.690459	0.226657	0.0573714	0.175275	0.0609343	0.899225	0.852778	1.14675	0.815979	0.577064	9207465	1.81173e+06	13577450		5.5145e+06	9287955	0.196767	1.47461		0.598916	1.00874	0.433627	0.822142		0.929267	1.12871	MAC16	0	MAC16	0	0.666426	0.83746	1.14675	0.872623	0.852885	0.693083	0.83746	1.14675	0.872623	0.852885	0.693083	0.83746
MA06	1	23889534	23504244	7427593	1526292	3518966	1634992	0.983872	0.310914	0.0638896	0.147302	0.0684397	1.28135	1.16979	1.27704	0.685752	0.648143	7.20548e+06	539115	12718145		3.72979e+06	5208872	0.0748202	1.76507		0.517633	0.722905	0.164885	0.984079		0.80315	0.808876	MA06	1	MA06	1	0.723119	1.07693	1.27704	0.744451	0.728509	0.752044	1.07693	1.27704	0.744451	0.728509	FALSE	FALSE
MAC11	1	20359988	21469890	4754403	1468201	3889774	829038	1.05451	0.233517	0.0721121	0.19105	0.040719	1.37335	0.87859	1.4414	0.889419	0.38562	4411744		11204673		3571631	1.67835e+06		2.53974		0.809573	0.380427		1.41598		1.25612	0.425669	MAC11	0	MAC11	0	0.686677	1.14729	1.4414	1.07277	0.405645	0.714144	1.14729	1.4414	1.07277	0.405645	0.714144	1.14729
MA04	1	20435248	20510482	6352811	1060500	5959883	1559816	1.00368	0.310875	0.0518956	0.291647	0.0763297	1.30715	1.16964	1.0373	1.35774	0.722863	5.09515e+06	402256	8579089	1.06586e+06	7.9479e+06	7.88043e+06	0.0789488	1.68378	0.20919	1.5599	1.54665	0.173984	0.938757		2.42031	1.73059	MA04	1	MA04	1	0.740568	1.0542	1.0373	1.88902	1.22673	0.770191	1.0542	1.0373	1.88902	1.22673	FALSE	FALSE
MAC12	1	34494900	28638894	6705431	2197198	4145916	1213910	0.830236	0.194389	0.0636963	0.120189	0.035191	1.08126	0.731374	1.27318	0.559532	0.333268	9236227	1.64416e+06	11791754		5557611	3.33975e+06	0.178012	1.27669		0.601719	0.361592	0.392294	0.711791		0.933616	0.404595	MAC12	0	MAC12	0	0.736779	0.721583	1.27318	0.746574	0.368931	0.76625	0.721583	1.27318	0.746574	0.368931	0.76625	0.721583
MA03	1	28833560	30167892	9113056	1451189	6706028	2103422	1.04628	0.316057	0.0503299	0.232577	0.0729505	1.36263	1.18914	1.00601	1.08275	0.690861	5938556	851289	9429680	724369	5098099	8610992	0.143349	1.58787	0.121977	0.858475	1.45001	0.315907	0.885289		1.33199	1.62246	MA03	1	MA03	1	0.839267	1.03721	1.00601	1.20737	1.15666	0.872838	1.03721	1.00601	1.20737	1.15666	FALSE	FALSE
MAC17	1	21605804	14578634	5248041	848350	3734159	491003	0.674755	0.2429	0.0392649	0.172831	0.0227255	0.878773	0.913891	0.784838	0.804603	0.215217	4331378	1.34535e+06	9974462		3244016	2706212	0.310606	2.30284		0.748957	0.624792	0.684499	1.2839		1.16207	0.699096	MAC17	0	MAC17	0	0.781636	1.0989	0.784838	0.983336	0.457156	0.812902	1.0989	0.784838	0.983336	0.457156	0.812902	1.0989
MA08	1	26421876	17914254	4886654	1226599	4271291	1330317	0.678008	0.184947	0.0464236	0.161657	0.0503491	0.88301	0.69585	0.927928	0.752584	0.47682	5.64035e+06	1.88393e+06	7639358		4204201	4724803	0.334009	1.35441		0.74538	0.837679	0.736074	0.755127		1.15652	0.9373	MA08	1	MA08	1	0.809542	0.725488	0.927928	0.954551	0.70706	0.841924	0.725488	0.927928	0.954551	0.70706	FALSE	FALSE
MAC25	2	21086328	7978274	3112809	1342291	3962987	3067171	0.378362	0.147622	0.0636569	0.187941	0.145458	0.492763	0.555417	1.27239	0.874946	1.37753	9693784	2.23246e+06	16436206		3.34043e+06	11724213	0.230298	1.69554		0.344595	1.20946	0.507521	0.945316		0.534667	1.35329	MAC25	0	MAC25	0	0.500142	0.750367	1.27239	0.704807	1.36541	0.520148	0.750367	1.27239	0.704807	1.36541	0.520148	0.750367
MA07	2	34418420	16354819	7261023	1246263	15112294	7077956	0.475176	0.210963	0.0362092	0.439076	0.205644	0.61885	0.793733	0.723759	2.04409	1.94751	15990850	6169827	19951252	1.24508e+06	8759889	22246480	0.385835	1.24767	0.0778618	0.547806	1.3912	0.850285	0.695613		0.849966	1.55665	MA07	1	MA07	1	0.734567	0.744673	0.723759	1.44703	1.75208	0.76395	0.744673	0.723759	1.44703	1.75208	FALSE	FALSE
MAC31	2	20532276	11260414	4730910	986416	6037148	2788472	0.548425	0.230413	0.0480422	0.294032	0.135809	0.714246	0.866913	0.960281	1.36884	1.28615	12241958	1.67625e+06	20039374		4.10301e+06	8406732	0.136926	1.63694		0.335159	0.686715	0.301752	0.912645		0.520027	0.768382	MAC31	0	MAC31	0	0.507999	0.889779	0.960281	0.944436	1.02727	0.528319	0.889779	0.960281	0.944436	1.02727	0.528319	0.889779
MA10	2	29109960	21108920	7688941	1307211	10517993	6059424	0.725144	0.264134	0.044906	0.361319	0.208156	0.944398	0.993785	0.897593	1.6821	1.9713	14274770	4847794	25002278	949364	6271703	13525325	0.339606	1.7515	0.0665064	0.439356	0.947499	0.748407	0.976516		0.681696	1.06018	MA10	1	MA10	1	0.846402	0.985151	0.897593	1.1819	1.51574	0.880258	0.985151	0.897593	1.1819	1.51574	FALSE	FALSE
MAC30	2	29705322	22986586	7110283	1496185	4612751	1886380	0.77382	0.239361	0.0503676	0.155284	0.0635031	1.00779	0.900576	1.00676	0.722912	0.601392	12348989	3.98764e+06	25052696		4939706	3.46603e+06	0.322912	2.02872		0.400009	0.280673	0.711619	1.13108		0.620647	0.314052	MAC30	0	MAC30	0	0.859705	1.01583	1.00676	0.671779	0.457722	0.894093	1.01583	1.00676	0.671779	0.457722	0.894093	1.01583
MA09	2	39057944	33502234	11475922	1643174	11197372	10908467	0.857757	0.293818	0.0420702	0.286686	0.279289	1.11711	1.10547	0.84091	1.33465	2.64495	15207679	18551150	26964696	1.45896e+06	14544211	29961738	1.21985	1.7731	0.0959358	0.956373	1.97017	2.68826	0.988556		1.48389	2.20447	MA09	1	MA09	1	1.90268	1.04701	0.84091	1.40927	2.42471	1.97879	1.04701	0.84091	1.40927	2.42471	FALSE	FALSE
MAC26	2	32807456	32722210	11208609	2015682	7919393	6156182	0.997402	0.341648	0.0614398	0.24139	0.187646	1.29897	1.28543	1.22807	1.12377	1.77706	11877334	7481305	27138670		8850969	18518510	0.629881	2.28491		0.745198	1.55915	1.3881	1.27391		1.15624	1.74457	MAC26	0	MAC26	0	1.34354	1.27967	1.22807	1.14	1.76081	1.39728	1.27967	1.22807	1.14	1.76081	1.39728	1.27967
MA13	2	36233444	41107400	16434549	2048595	10084485	8790181	1.13452	0.453574	0.0565388	0.27832	0.242599	1.47755	1.70654	1.13011	1.2957	2.29747	15700402	7.43356e+06	22100480	923719	11162354	31008030	0.473463	1.40764	0.0588341	0.71096	1.97498	1.0434	0.784801		1.10311	2.20986	MA13	1	MA13	1	1.26047	1.24567	1.13011	1.1994	2.25367	1.31089	1.24567	1.13011	1.1994	2.25367	FALSE	FALSE
MAC27	2	28039936	30786384	10411055	1236234	7224050	4942521	1.09795	0.371294	0.0440883	0.257634	0.176267	1.42992	1.39696	0.88125	1.1994	1.6693	13204197	10071157	17710510		10952745	17106940	0.762724	1.34128		0.82949	1.29557	1.68086	0.747804		1.28702	1.44964	MAC27	0	MAC27	0	1.55539	1.07238	0.88125	1.24321	1.55947	1.6176	1.07238	0.88125	1.24321	1.55947	1.6176	1.07238
MA14	2	34678228	24906804	8820214	1261757	10982366	10615897	0.718226	0.254344	0.0363847	0.316693	0.306126	0.935387	0.956951	0.727267	1.47434	2.89909	15337393	11354473	19934456	1.38565e+06	7.30204e+06	31700870	0.740313	1.29973	0.0903443	0.476094	2.0669	1.63147	0.724639		0.738699	2.31271	MA14	1	MA14	1	1.28343	0.840795	0.727267	1.10652	2.6059	1.33476	0.840795	0.727267	1.10652	2.6059	FALSE	FALSE
MAC29	2	25393006	16649081	6904866	711755	10494361	6912974	0.655656	0.27192	0.0280296	0.413278	0.272239	0.853899	1.02308	0.560263	1.92398	2.57818	12756329	6.8939e+06	18317640		12148284	20956986	0.54043	1.43596		0.952334	1.64287	1.19097	0.800595		1.47762	1.83825	MAC29	0	MAC29	0	1.02244	0.911836	0.560263	1.7008	2.20821	1.06333	0.911836	0.560263	1.7008	2.20821	1.06333	0.911836
MA21	2	17488790	4524649	5706401	852801	4924116	3582277	0.258717	0.326289	0.0487627	0.281558	0.204833	0.336942	1.22764	0.974683	1.31077	1.93982	7.82374e+06	3055124	7952815		4.96381e+06	11208872	0.390494	1.0165		0.634455	1.43267	0.860552	0.566728		0.984409	1.60305	MA21	1	MA21	1	0.598747	0.897183	0.974683	1.14759	1.77144	0.622697	0.897183	0.974683	1.14759	1.77144	FALSE	FALSE
MAC28	3	36133384	22242108	14257199	1508392	6796504	3362200	0.615556	0.394571	0.0417451	0.188095	0.0930497	0.801674	1.48454	0.834413	0.875662	0.881206	8433523	5117131	14419409		5.44632e+06	3.1108e+06	0.606761	1.70977		0.645794	0.368861	1.33715	0.953251		1.002	0.412728	MAC28	0	MAC28	0	1.06941	1.2189	0.834413	0.938832	0.646967	1.11219	1.2189	0.834413	0.938832	0.646967	1.11219	1.2189
MA18	3	23914256	15325446	11336449	1081396	7373848	3365990	0.64085	0.474046	0.0452197	0.308345	0.140752	0.834616	1.78356	0.903864	1.43548	1.33296	7.83446e+06	8669379	21192644		6.92703e+06	7854587	1.10657	2.70506		0.884174	1.00257	2.43861	1.50815		1.37187	1.1218	MA18	1	MA18	1	1.63661	1.64586	0.903864	1.40367	1.22738	1.70208	1.64586	0.903864	1.40367	1.22738	FALSE	FALSE
MAC32	3	19572112	13962399	6969298	877691	4249152	1774294	0.713382	0.356083	0.044844	0.217102	0.0906542	0.929079	1.33974	0.896353	1.0107	0.85852	4895706	6732608	13431555		3.17848e+06	5586225	1.37521	2.74354		0.649237	1.14105	3.03062	1.52961		1.00734	1.27674	MAC32	0	MAC32	0	1.97985	1.43467	0.896353	1.00902	1.06763	2.05904	1.43467	0.896353	1.00902	1.06763	2.05904	1.43467
MA19	3	29633128	2479166	8230578	1054412	5733583	5239426											6826380	15021245	7856060	692964	9497755	19535686	2.20047	1.15084	0.101513	1.39133	2.86179	4.84929	0.641628		2.15876	3.20213	MA19	1	MA19	1	2.42465	0.320814		1.07938	1.60107	2.52163	0.320814		1.07938	1.60107	FALSE	FALSE
MA20	3	23863572	11939924	6843218	1459087	4486126	3325478	0.500341	0.286764	0.0611429	0.187991	0.139354	0.651623	1.07893	1.22214	0.875176	1.31972	5338065	5.88793e+06	1.63867e+06		1.58024e+06	1.6509e+06	1.10301	0.306979		0.296033	0.309269	2.43076	0.17115		0.45932	0.346049	MA20	1	MA20	1	1.54119	0.625039	1.22214	0.667248	0.832884	1.60284	0.625039	1.22214	0.667248	0.832884	FALSE	FALSE
MA33	3	33225062	20897172	10801848	1755019	5419018	4571738	0.628958	0.325111	0.0528221	0.1631	0.137599	0.819129	1.22321	1.05582	0.759302	1.3031	6105051	2.7827e+06	10456036		7.39188e+06	14570334	0.455803	1.71269		1.21078	2.3866	1.00448	0.954875		1.87863	2.67043	MA33	1	MA33	1	0.911803	1.08904	1.05582	1.31896	1.98676	0.948275	1.08904	1.05582	1.31896	1.98676	FALSE	FALSE
MAC22						Control Avergae		0.767838	0.265786	0.0500293	0.214803	0.105594						2814844						0.453771	1.79362		0.644504	0.893715										0.961538	1	1	1	1
																																			AV													1	1
													1.23903	0.770713	0.714045	0.830242	0.4595												0.34099	0.471979		1.11336	1.18428		SD													0.6325	0.450811
													0.899225	0.852778	1.14675	0.815979	0.577064												0.433627	0.822142		0.929267	1.12871															0.175424	0.125033
													1.37335	0.87859	1.4414	0.889419	0.38562													1.41598		1.25612	0.425669
													1.08126	0.731374	1.27318	0.559532	0.333268												0.392294	0.711791		0.933616	0.404595
													0.878773	0.913891	0.784838	0.804603	0.215217												0.684499	1.2839		1.16207	0.699096
													0.492763	0.555417	1.27239	0.874946	1.37753												0.507521	0.945316		0.534667	1.35329
													0.714246	0.866913	0.960281	1.36884	1.28615												0.301752	0.912645		0.520027	0.768382															CV	CIII
													1.00779	0.900576	1.00676	0.722912	0.601392												0.711619	1.13108		0.620647	0.314052															0.821613	0.621346
													1.29897	1.28543	1.22807	1.12377	1.77706												1.3881	1.27391		1.15624	1.74457
													1.42992	1.39696	0.88125	1.1994	1.6693												1.68086	0.747804		1.28702	1.44964															0.693083	0.83746
													0.853899	1.02308	0.560263	1.92398	2.57818												1.19097	0.800595		1.47762	1.83825
													0.801674	1.48454	0.834413	0.875662	0.881206												1.33715	0.953251		1.002	0.412728															0.714144	1.14729
													0.929079	1.33974	0.896353	1.0107	0.85852												3.03062	1.52961		1.00734	1.27674
																																																0.76625	0.721583
													0.656568	0.623014	0.963675	0.687879	0.376035												0.206875	0.271055		0.868365	0.790661
													1.28135	1.16979	1.27704	0.685752	0.648143												0.164885	0.984079		0.80315	0.808876															0.812902	1.0989
													1.30715	1.16964	1.0373	1.35774	0.722863												0.173984	0.938757		2.42031	1.73059
													1.36263	1.18914	1.00601	1.08275	0.690861												0.315907	0.885289		1.33199	1.62246															0.520148	0.750367
													0.88301	0.69585	0.927928	0.752584	0.47682												0.736074	0.755127		1.15652	0.9373
													0.61885	0.793733	0.723759	2.04409	1.94751												0.850285	0.695613		0.849966	1.55665															0.528319	0.889779
													0.944398	0.993785	0.897593	1.6821	1.9713												0.748407	0.976516		0.681696	1.06018
													1.11711	1.10547	0.84091	1.33465	2.64495												2.68826	0.988556		1.48389	2.20447															0.894093	1.01583
													1.47755	1.70654	1.13011	1.2957	2.29747												1.0434	0.784801		1.10311	2.20986
													0.935387	0.956951	0.727267	1.47434	2.89909												1.63147	0.724639		0.738699	2.31271															1.39728	1.27967
													0.336942	1.22764	0.974683	1.31077	1.93982												0.860552	0.566728		0.984409	1.60305
													0.834616	1.78356	0.903864	1.43548	1.33296												2.43861	1.50815		1.37187	1.1218															1.6176	1.07238
													0.651623	1.07893	1.22214	0.875176	1.31972												4.84929	0.641628		2.15876	3.20213
													0.819129	1.22321	1.05582	0.759302	1.3031												2.43076	0.17115		0.45932	0.346049															1.06333	0.911836
																													1.00448	0.954875		1.87863	2.67043
																																																1.11219	1.2189
																																																2.05904	1.43467
[truncated: 8 more columns]
