# Supplementary material for: Unbiased proteomics, histochemistry, and mitochondrial DNA copy number reveal better mitochondrial health in muscle of high-functioning octogenarians
Source: eLife. 2022 Apr 11;11:e74335. doi: 10.7554/eLife.74335 (PMC9090325; doi:10.7554/eLife.74335)
Supplement: Figure 3—figure supplement 6—source data 1. [file elife-74335-fig3-figsupp6-data1.xlsx]

## Sheet: Laser Area practice
Subject	Section	Laser date	Cap type	Number of cells	Area	Total Area	Per fibre	Tube Number
MA02		2013-11-19	MAC	20 (4x5)	36018.8			1			Lysis buffer			MM
					38503.1						Tris_HCL	50		100
					39493.4						1%Tween 20	250		500
					36444.3	150460	7522.98				H2O	195		390
			MAC	25 (5x5)	30780.2			2			Proteinase K	5		10
					32926.9						Total	500		1000
					31511.4
					30323.5						Numner of samples	3
					40640.3	166182	6647.29				Amount of buffer needed	20
			MAC	30 (6X5)	36943.4			3			Total	60
					42410.6
					29435.6
					32428.9
					29003.3
					41979.9	212202	7073.39

## Sheet: Laser Area
Subject	Tube	Date	Section	Cell Areas/25 cells (5x5)	Totals	Per cell									Lysis buffer			MM
MAC15	1	2013-11-26	30	27416.5											Tris_HCL	50		75
				24200.2											1%Tween 20	250		375
				28458.3											H2O	195		292.5
				22763.9											Proteinase K	5		7.5
				19919.7	122759	4910.34									Total	500		750
MA05	2	2013-11-26	34	34859.4
				28681.7											Numner of samples	30
				23830.2											Amount of buffer needed	20
				30564.2											Total	600
				21266.2	139202	5568.07
MAC16	3	2013-11-26	30	18322.6
				14259.1
				21350.3
				14917.3
				17700	86549.3	3461.97
MA06	4	2013-11-26	30	26146.1
				21865.6
				26442.6
				17289.7
				30264.3	122008	4880.33
MAC11	5	2013-11-26	30	16293.5
				21180
				15084.7
				32302.2
				33025	117885	4715.42
MA04	6	2013-11-26	39	44507.9
				45572.5
				47585.9
				43986.9
				51821.3	233475	9338.98
MAC12	7	2013-11-26	32	19634.7
				19161.8
				21099.5
				21277.4
				13106.2	94279.6	3771.18
MA03	8	2013-11-26	34	30455.2
				20870.2
				43964.2
				32024.5
				29114.4	156428	6257.14
MAC17	9	2013-11-26	30	13921
				13201.4
				13369.8
				16547.9
				15620.8	72660.9	2906.44
MA08	10	2013-11-26	28	19081.4
				16736.2
				17595.7
				19268.1
				19542.1	92223.6	3688.94
MAC25	11	2013-11-26	39	17458
				26661.3
				23848.2
				22008
				24200	114175	4567.02
MA07	12	2013-11-26	36	24151.3
				31380.3
				26583.2
				37092.1
				22936.5	142143	5685.73
MAC31	13	2013-11-26	45	16436.9
				24194.2
				12517.3
				20289.2
				20332.5	93770.1	3750.8
MA10	14	2013-11-26	30	22609.1
				21420.2
				19487.3
				35483.4
				16038.7	115039	4601.55
MAC30	15	2013-11-26	30	36995.7
				21628.8
				22555.5
				29590.2
				23649.2	134419	5376.78
MA09	16	2013-11-26	32	18055.9
				13209.7
				17817.7
				19458.9
				15913.7	84455.9	3378.23
MAC26	17	2013-11-26	45	16346.2
				12122.3
				12256.5
				26588.4
				20647.3	87960.7	3518.43
MA13	18	2013-11-27	30	23329.9
				31646.2
				30606.7
				24442.8
				26998.5	137024	5480.96
MAC27	19	2013-11-27	32	22909.7
				18004
				19380.7
				21007
				18696.4	99997.7	3999.91
MA14	20	2013-11-27	27	73412.2
				47885.3
				32373.5
				42231.6
				33171.9	229074	9162.98
MAC29	21	2013-11-27	33	41771.2
				25404.8
				31771.2
				28444.2
				31559.7	158951	6358.04
MA21	22	2013-11-27	31	28216.3
				38462.8
				21208.8
				37638.4
				27154.3	152681	6107.22
MAC28	23	2013-11-27	31	24291.7
				23532.8
				30810
				21004.7
				18859.6	118499	4739.95
MA18	24	2013-11-27	46	27024.7
				27558.5
				14237.2
				18347.9
				21585.9	108754	4350.17
MAC32	25	2013-11-27	35	59471.2
				26653.9
				32775.6
				30133
				22781.7	171815	6872.62
MA19	26	2013-11-27	30	19408.3
				29115.2
				16630.6
				19180.5
				19134.9	103470	4138.78
MA20	27	2013-11-27	35	17546
				15601.5
				24440.7
				22728.7
				18037.3	98354.1	3934.17
MA33	28	2013-11-27	30	38997.8
				20960.3
				20908.6
				24949.3
				29009.1	134825	5393.01
MAC22	29	2013-11-27	9	20626.4
				18070.9
				18465.7
				13625.2
				18537.2	89325.4	3573.01

## Sheet: Template Copy Number
ND1 Template Copy Number Calculations
	DNA Concentration (ng/µl)			Average (ng/µl)		PCR Template Size (bp)
ND1 Copy Number	21.4	21.5		21.45		1040
ND1 Copy Number Calculation
Avagadros	6.03e+23
MW (bp*330*2)	686400
[DNA]ng to g	2.145e-08
ND1 Copy Number (CN)=	((g[DNA]*10-9)/(MW))*Avagadros
ND1 Copy Number (CN)=	18843750000	Perform serial 1/10 dilutions to get standard curve
Standard Curve
Dilution Factor	Copy Number	Log Dilution factor
0	18843750000	#NUM!
10	1884375000	1
100	188437500	2
1000	18843750	3
10000	1884375	4
100000	188438	5
1000000	18843.8	6
10000000	1884.38	7
100000000	188.438	8
1000000000	18.8438	9
10000000000	1.88437	10
100000000000	0.188437	11
1000000000000	0.0188437	12

## Sheet: Standard Curve
Dilution		Copy Number	Log (CN)		Run 1	Run 2	Run 3	Run 4	Run 5	Run 6		Average
0	0	18843750000	10.2752
10	10	1884375000	9.27517		7.28916							7.28916
100	100	188437500	8.27517		11.229							11.229
1000	1000	18843750	7.27517		15.2226							15.2226
10000	10000	1884375	6.27517		19.3984	17.4352	18.9658	18.1697	18.4282	17.862		18.3766
100000	100000	188438	5.27517		21.6535	21.4188	22.3676	21.6351	21.8175	21.4232		21.7193
1000000	1000000	18843.8	4.27517		25.1813	24.5059	25.7828	25.0099	25.3641	24.8306		25.1124
10000000	10000000	1884.38	3.27517			28.8253	28.9987	28.9561	28.6388	28.4566		28.7751
100000000	100000000	188.438	2.27517			32.3631	31.4675	31.154	31.0448	31.4535		31.4966
1000000000	1000000000	18.8438	1.27517			35.5534						35.5534
10000000000	10000000000	1.88437	0.275167
100000000000	100000000000	0.188437	-0.724833
1000000000000	1000000000000	0.0188437	-1.72483
2013-11-14		CN		CT
10	10	1884375000	9.27517	7.28916
100	100	188437500	8.27517	11.229
1000	1000	18843750	7.27517	15.2226
10000	10000	1884375	6.27517	19.3984
100000	100000	188438	5.27517	21.6535
1000000	1000000	18843.8	4.27517	25.1813
2013-11-19
Dilution		Copy Number	Log (CN)	CT
10000	10000	1884375	6.27517	17.4352
100000	100000	188438	5.27517	21.4188
1000000	1000000	18843.8	4.27517	24.5059
10000000	10000000	1884.38	3.27517	28.8253
100000000	100000000	188.438	2.27517	32.3631
1000000000	1000000000	18.8438	1.27517	35.5534
Samples	CT	X	Anti Log	x20 for lysis	Area µm2	CN/µm2
MA02 20 Cells	30.6532	2.68748	486.949	9738.98	150460	0.0647282
MA02 25 Cells	23.7955	4.5664	36847.1	736943	166182	4.43454
MA02 30 Cells	23.4062	4.67307	47105.5	942109	212202	4.43969
Lysis	33.4961
NTC	36.9698
2013-11-28
Dilution		Copy Number	Log (CN)
10000	10000	1884375	6.27517	18.9658
100000	100000	188438	5.27517	22.3676
1000000	1000000	18843.8	4.27517	25.7828
10000000	10000000	1884.38	3.27517	28.9987
100000000	100000000	188.438	2.27517	31.4675
1000000000	1000000000	18.8438	1.27517
2013-11-28		Copy Number	Log (CN)	CT
10000	10000	1884375	6.27517	18.1697
100000	100000	188438	5.27517	21.6351
1000000	1000000	18843.8	4.27517	25.0099
10000000	10000000	1884.38	3.27517	28.9561
100000000	100000000	188.438	2.27517	31.154
1000000000	1000000000	18.8438	1.27517
Well	Sample Name	Target	Cт	Average
A1	ND1 1 in 10 to the 4	ND1	18.1073
A2	ND1 1 in 10 to the 4	ND1	18.385
A3	ND1 1 in 10 to the 4	ND1	18.0167	18.1697
B1	ND1 1 in 10 to the 5	ND1	21.6035
B2	ND1 1 in 10 to the 5	ND1	21.7038
B3	ND1 1 in 10 to the 5	ND1	21.5979	21.6351
C1	ND1 1 in 10 to the 6	ND1	24.9519
C2	ND1 1 in 10 to the 6	ND1	25.024
C3	ND1 1 in 10 to the 6	ND1	25.0539	25.0099
D1	ND1 1 in 10 to the 7	ND1	28.746
D2	ND1 1 in 10 to the 7	ND1	28.8377
D3	ND1 1 in 10 to the 7	ND1	29.2844	28.9561
E1	ND1 1 in 10 to the 8	ND1	31.1658
E2	ND1 1 in 10 to the 8	ND1	30.8854
E3	ND1 1 in 10 to the 8	ND1	31.4107	31.154
F1	ND1 1 in 10 to the 9	ND1	31.7297
F2	ND1 1 in 10 to the 9	ND1	31.846
F3	ND1 1 in 10 to the 9	ND1	31.9631	31.8463
Well	Sample Name	Target	Cт	Average	X	Anti Log	x20 for lysis	Area µm2	CN/µm2
H1	MA05	ND1	24.8941
H2	MA05	ND1	24.734
H3	MA05	ND1	24.6778	24.7686	4.37166	23532	470639	139202	3.38099
H4	MA08	ND1	24.8911
H5	MA08	ND1	24.8779
H6	MA08	ND1	24.826	24.865	4.34381	22070.6	441411	92223.6	4.78632
F7	MA09	ND1	24.799
F8	MA09	ND1	24.7837
F9	MA09	ND1	24.9513	24.8447	4.3497	22371.7	447433	84455.9	5.29783
D7	MA10	ND1	24.2595
D8	MA10	ND1	24.2296
D9	MA10	ND1	24.4319	24.307	4.50502	31990.1	639803	115039	5.56163
H7	MA13	ND1	23.032
H8	MA13	ND1	23.32
H9	MA13	ND1	23.6599	23.3373	4.78513	60971.6	1.21943e+06	137024	8.89939
B10	MA14	ND1	23.4336
B11	MA14	ND1	23.3905
B12	MA14	ND1	23.2353	23.3531	4.78056	60333.3	1.20667e+06	229074	5.26757
F10	MA18	ND1	25.2415
F11	MA18	ND1	25.4646
F12	MA18	ND1	25.9715	25.5592	4.14328	13908.5	278170	108754	2.55779
D10	MA21	ND1	24.5253
D11	MA21	ND1	24.7657
D12	MA21	ND1	24.5279	24.6063	4.41856	26215.3	524306	152681	3.43401
C4	MAC11	ND1	26.2516
C5	MAC11	ND1	26.0263
C6	MAC11	ND1	26.1066	26.1282	3.97892	9526.15	190523	117885	1.61617
E4	MAC12	ND1	25.4706
E5	MAC12	ND1	25.4834
E6	MAC12	ND1	25.4829	25.479	4.16646	14671	293419	94279.6	3.11222
G4	MAC17	ND1	25.9114
G5	MAC17	ND1	25.9651
G6	MAC17	ND1	25.7648	25.8805	4.05048	11232.6	224651	72660.9	3.09178
A7	MAC25	ND1	24.9269
A8	MAC25	ND1	24.9965
A9	MAC25	ND1	25.0477	24.9904	4.3076	20305	406100	114175	3.5568
G7	MAC26	ND1	26.0021
G8	MAC26	ND1	26.2026
G9	MAC26	ND1	25.9623	26.0556	3.99987	9997.05	199941	87960.7	2.27307
A10	MAC27	ND1	24.9316
A11	MAC27	ND1	25.2553
A12	MAC27	ND1	25.294	25.1603	4.25851	18134.5	362690	99997.7	3.62698
E10	MAC28	ND1	25.3701
E11	MAC28	ND1	25.3017
E12	MAC28	ND1	25.4292	25.367	4.1988	15805.2	316105	118499	2.66758
C10	MAC29	ND1	24.981
C11	MAC29	ND1	24.7233
C12	MAC29	ND1	25.0247	24.9097	4.33092	21424.8	428495	158951	2.69577
E7	MAC30	ND1	25.338
E8	MAC30	ND1	25.3561
E9	MAC30	ND1	25.3732	25.3558	4.20205	15923.9	318478	134419	2.36929
C7	MAC31	ND1	25.9846
C8	MAC31	ND1	25.9152
C9	MAC31	ND1	26.1948	26.0315	4.00684	10158.8	203175	93770.1	2.16674
F4	MA03	ND1	Undetermined
F5	MA03	ND1	Undetermined
F6	MA03	ND1	Undetermined
D4	MA04	ND1	Undetermined
D5	MA04	ND1	Undetermined
D6	MA04	ND1	Undetermined
G1	MAC15	ND1	Undetermined
G2	MAC15	ND1	Undetermined
G3	MAC15	ND1	Undetermined
A4	MAC16	ND1	Undetermined
A5	MAC16	ND1	Undetermined
A6	MAC16	ND1	Undetermined
B4	MA06	ND1	Undetermined
B5	MA06	ND1	Undetermined
B6	MA06	ND1	Undetermined
B7	MA07	ND1	Undetermined
B8	MA07	ND1	Undetermined
B9	MA07	ND1	Undetermined
H10	NTC	ND1	32.119
H11	NTC	ND1	31.634
H12	NTC	ND1	31.6798
G10	Lysis	ND1	32.5262
G11	Lysis	ND1	32.3174
G12	Lysis	ND1	32.7808
2013-11-28		Copy Number	Log (CN)
10000	10000	1884375	6.27517	18.4282
100000	100000	188438	5.27517	21.8175
1000000	1000000	18843.8	4.27517	25.3641
10000000	10000000	1884.38	3.27517	28.6388
100000000	100000000	188.438	2.27517	31.0448
1000000000	1000000000	18.8438	1.27517
Well	Sample	Target	Cт	Average
A1	ND1 1 in 10 to the 4	ND1	18.3011
A2	ND1 1 in 10 to the 4	ND1	18.5163
A3	ND1 1 in 10 to the 4	ND1	18.4672	18.4282
B1	ND1 1 in 10 to the 5	ND1	21.7723
B2	ND1 1 in 10 to the 5	ND1	21.8517
B3	ND1 1 in 10 to the 5	ND1	21.8286	21.8175
C1	ND1 1 in 10 to the 6	ND1	25.2121
C2	ND1 1 in 10 to the 6	ND1	25.5161
C3	ND1 1 in 10 to the 6	ND1	32.2325	25.3641
D1	ND1 1 in 10 to the 7	ND1	28.6551
D2	ND1 1 in 10 to the 7	ND1	28.2923
D3	ND1 1 in 10 to the 7	ND1	28.969	28.6388
E1	ND1 1 in 10 to the 8	ND1	31.3917
E2	ND1 1 in 10 to the 8	ND1	30.7846
E3	ND1 1 in 10 to the 8	ND1	30.9579	31.0448
F1	ND1 1 in 10 to the 9	ND1	32.6224
F2	ND1 1 in 10 to the 9	ND1	32.5042
F3	ND1 1 in 10 to the 9	ND1	32.6466	32.5911
				Average	X	Anti Log	x20 for lysis	Area µm2	CN/µm2
E4	MA05	ND1	25.114
E5	MA05	ND1	25.3404
E6	MA05	ND1	25.1465	25.2003	4.24696	17658.8	353177	139202	2.53716
E7	MA08	ND1	25.3085
E8	MA08	ND1	25.4112
E9	MA08	ND1	25.2928	25.3375	4.20733	16118.6	322372	92223.6	3.49555
C10	MA09	ND1	25.2025
C11	MA09	ND1	25.1504
C12	MA09	ND1	25.2422	25.1984	4.24751	17681.2	353623	84455.9	4.18708
A10	MA10	ND1	24.6035
A11	MA10	ND1	24.6502
A12	MA10	ND1	24.7227	24.6588	4.40339	25315.7	506314	115039	4.40125
E10	MA13	ND1	23.642
E11	MA13	ND1	23.6685
E12	MA13	ND1	23.6754	23.662	4.69135	49130	982599	137024	7.171
H1	MA19	ND1	25.4649
H2	MA19	ND1	25.4303
H3	MA19	ND1	25.4877	25.4609	4.17166	14847.9	296958	103470	2.87
A4	MA20	ND1	28.1338
A5	MA20	ND1	27.4521
A6	MA20	ND1	27.8393	27.8084	3.49354	3115.6	62312	98354.1	0.633547
B4	MA33	ND1	25.5421
B5	MA33	ND1	25.4412
B6	MA33	ND1	25.4647	25.4827	4.16539	14634.9	292698	134825	2.17095
H4	MAC11	ND1	26.5436
H5	MAC11	ND1	26.5713
H6	MAC11	ND1	26.4831	26.5326	3.86208	7279.11	145582	117885	1.23495
B7	MAC12	ND1	25.9609
B8	MAC12	ND1	25.9036
B9	MAC12	ND1	25.9216	25.9287	4.03654	10877.8	217555	94279.6	2.30756
D7	MAC17	ND1	26.128
D8	MAC17	ND1	26.5298
D9	MAC17	ND1	26.4022	26.3534	3.91387	8201.09	164022	72660.9	2.25736
C4	MAC22	ND1	26.9014
C5	MAC22	ND1	26.8641
C6	MAC22	ND1	26.7995	26.855	3.76896	5874.33	117487	89325.4	1.31527
F7	MAC25	ND1	25.2127
F8	MAC25	ND1	25.5779
F9	MAC25	ND1	25.4316	25.4074	4.18713	15386.2	307724	114175	2.69518
D10	MAC26	ND1	26.6367
D11	MAC26	ND1	26.2917
D12	MAC26	ND1	26.5862	26.5049	3.87011	7414.91	148298	87960.7	1.68596
F10	MAC27	ND1	24.984
F11	MAC27	ND1	24.8618
F12	MAC27	ND1	24.8267	24.8908	4.33636	21694.9	433897	99997.7	4.33907
B10	MAC30	ND1	25.5425
B11	MAC30	ND1	25.7409
B12	MAC30	ND1	25.7743	25.6859	4.10668	12784.3	255686	134419	1.90215
H7	MAC31	ND1	26.0816
H8	MAC31	ND1	26.0815
H9	MAC31	ND1	26.04	26.0677	3.99639	9917.18	198344	93770.1	2.11521
G1	MAC32	ND1	24.7222
G2	MAC32	ND1	24.9499
G3	MAC32	ND1	24.7643	24.8121	4.35909	22860.9	457219	171815	2.6611
C7	MA03	ND1	Undetermined
C8	MA03	ND1	Undetermined
C9	MA03	ND1	Undetermined
A7	MA04	ND1	Undetermined
A8	MA04	ND1	Undetermined
A9	MA04	ND1	Undetermined
G4	MA06	ND1	Undetermined
G5	MA06	ND1	Undetermined
G6	MA06	ND1	Undetermined
G7	MA07	ND1	Undetermined
G8	MA07	ND1	Undetermined
G9	MA07	ND1	Undetermined
D4	MAC15	ND1	Undetermined
D5	MAC15	ND1	Undetermined
D6	MAC15	ND1	Undetermined
F4	MAC16	ND1	Undetermined
F5	MAC16	ND1	Undetermined
F6	MAC16	ND1	Undetermined
H10	NTC	ND1	32.5831
H11	NTC	ND1	32.6917
H12	NTC	ND1	32.82
G10	Lysis	ND1	Undetermined
G11	Lysis	ND1	Undetermined
G12	Lysis	ND1	Undetermined
Dilution		Copy Number	Log (CN)
10000	10000	1884375	6.27517	17.862
100000	100000	188438	5.27517	21.4232
1000000	1000000	18843.8	4.27517	24.8306
10000000	10000000	1884.38	3.27517	28.4566
100000000	100000000	188.438	2.27517	31.4535
1000000000	1000000000	18.8438	1.27517
Well	Sample	Target	Cт
A1	ND1 1 in 10 to the 4	ND1	17.8627
A2	ND1 1 in 10 to the 4	ND1	17.9216
A3	ND1 1 in 10 to the 4	ND1	17.8018	17.862
B1	ND1 1 in 10 to the 5	ND1	21.3624
B2	ND1 1 in 10 to the 5	ND1	21.5097
B3	ND1 1 in 10 to the 5	ND1	21.3974	21.4232
C1	ND1 1 in 10 to the 6	ND1	24.664
C2	ND1 1 in 10 to the 6	ND1	24.9972
C3	ND1 1 in 10 to the 6	ND1	31.6581	24.8306
D1	ND1 1 in 10 to the 7	ND1	28.1283
D2	ND1 1 in 10 to the 7	ND1	28.5936
D3	ND1 1 in 10 to the 7	ND1	28.6478	28.4566
E1	ND1 1 in 10 to the 8	ND1	31.041
E2	ND1 1 in 10 to the 8	ND1	31.278
E3	ND1 1 in 10 to the 8	ND1	32.0415	31.4535
F1	ND1 1 in 10 to the 9	ND1	31.8285
F2	ND1 1 in 10 to the 9	ND1	32.1286
F3	ND1 1 in 10 to the 9	ND1	32.0179	31.9917
				Average	X	Anti Log	x20 for lysis	Area µm2	CN/µm2
G1	MA14	ND1	23.4177
G2	MA14	ND1	23.3477
G3	MA14	ND1	23.1798	23.3151	4.79156	61881.4	1.23763e+06	229074	5.40273
C4	MA18	ND1	24.8567
C5	MA18	ND1	24.7368
C6	MA18	ND1	24.6946	24.7627	4.37337	23625.1	472502	108754	4.34468
E4	MA19	ND1	25.0646
E5	MA19	ND1	25.3184
E6	MA19	ND1	25.1127	25.1652	4.25709	18075.4	361507	103470	3.49385
F4	MA20	ND1	27.2097
F5	MA20	ND1	27.4649
F6	MA20	ND1	27.2423	27.3056	3.63878	4352.88	87057.6	98354.1	0.885144
A4	MA21	ND1	24.0252
A5	MA21	ND1	24.0713
A6	MA21	ND1	23.9835	24.0267	4.58599	38546.5	770931	152681	5.0493
G4	MA33	ND1	24.8902
G5	MA33	ND1	24.7653
G6	MA33	ND1	24.9122	24.8559	4.34645	22205.1	444103	134825	3.29392
H4	MAC22	ND1	26.962
H5	MAC22	ND1	26.9149
H6	MAC22	ND1	26.9859	26.9542	3.74029	5499.08	109982	89325.4	1.23125
B4	MAC28	ND1	24.7848
B5	MAC28	ND1	24.9887
B6	MAC28	ND1	24.7624	24.8453	4.3495	22361.6	447232	118499	3.77415
H1	MAC29	ND1	24.4245
H2	MAC29	ND1	24.4121
H3	MAC29	ND1	24.5265	24.4544	4.46244	29002.6	580052	158951	3.64925
D4	MAC32	ND1	24.3079
D5	MAC32	ND1	24.8132
D6	MAC32	ND1	24.7757	24.6322	4.41106	25766.5	515331	171815	2.99933
B7	NTC	ND1	31.9333
B8	NTC	ND1	31.9464
B9	NTC	ND1	31.5492
A7	Lysis	ND1	33.3076
A8	Lysis	ND1	33.452
A9	Lysis	ND1	33.1184

## Sheet: Final Results
Subject	Total Area	ng DNA	ng DNA/Area	CN/µm2 1st run	CN/µm2 2nd run	Average							3.38099	2.53716
MAC15	122759			Undetermined	Undetermined	#DIV/0!			Controls	Athletes			1.61617	1.23495
MA05	139202			3.38099	2.53716	2.95908			1.42556	4.14094			3.11222	2.30756
MAC16	86549.3			Undetermined	Undetermined	#DIV/0!			2.70989	4.98144			3.09178	2.25736
MA06	122008			Undetermined	Undetermined	#DIV/0!			2.67457	4.74246			4.78632	3.49555
MAC11	117885			1.61617	1.23495	1.42556			3.12599	8.0352			3.5568	2.69518
MA04	233475			Undetermined	Undetermined	#DIV/0!			2.14097	5.33515			2.16674	2.11521
MAC12	94279.6			3.11222	2.30756	2.70989			2.13572	4.24166			5.56163	4.40125
MA03	156428			Undetermined	Undetermined	#DIV/0!			1.97952	3.45123			2.36929	1.90215
MAC17	72660.9			3.09178	2.25736	2.67457			3.98303	3.18193			5.29783	4.18708
MA08	92223.6			4.78632	3.49555	4.14094			3.17251	0.759346			2.27307	1.68596
MAC25	114175			3.5568	2.69518	3.12599			3.22087	2.73243			8.89939	7.171
MA07	142143			Undetermined	Undetermined	#DIV/0!			2.83022				3.62698	4.33907
MAC31	93770.1			2.16674	2.11521	2.14097			1.27326				5.26757	5.40273
MA10	115039			5.56163	4.40125	4.98144							2.69577	3.64925
MAC30	134419			2.36929	1.90215	2.13572							3.43401	5.0493
MA09	84455.9			5.29783	4.18708	4.74246							2.66758	3.77415
MAC26	87960.7			2.27307	1.68596	1.97952		Average	2.55601	4.16018			2.55779	4.34468
MA13	137024			8.89939	7.171	8.0352		SD	0.792058	1.89972			2.6611	2.99933
MAC27	99997.7			3.62698	4.33907	3.98303							2.87	3.49385
MA14	229074			5.26757	5.40273	5.33515		Ttest	0.0147137				0.633547	0.885144
MAC29	158951			2.69577	3.64925	3.17251							2.17095	3.29392
MA21	152681			3.43401	5.0493	4.24166							1.31527	1.23125
MAC28	118499			2.66758	3.77415	3.22087
MA18	108754			2.55779	4.34468	3.45123
MAC32	171815			2.6611	2.99933	2.83022
MA19	103470			2.87	3.49385	3.18193
MA20	98354.1			0.633547	0.885144	0.759346
MA33	134825			2.17095	3.29392	2.73243
MAC22	89325.4			1.31527	1.23125	1.27326
