# Supplementary material for: Unbiased proteomics, histochemistry, and mitochondrial DNA copy number reveal better mitochondrial health in muscle of high-functioning octogenarians
Source: eLife journal article supplement (doi:10.7554/elife.74335), 2022-04-11
Supplement: supp [file elife-74335-supp-v1.zip]

Figure 3-figure supplement2

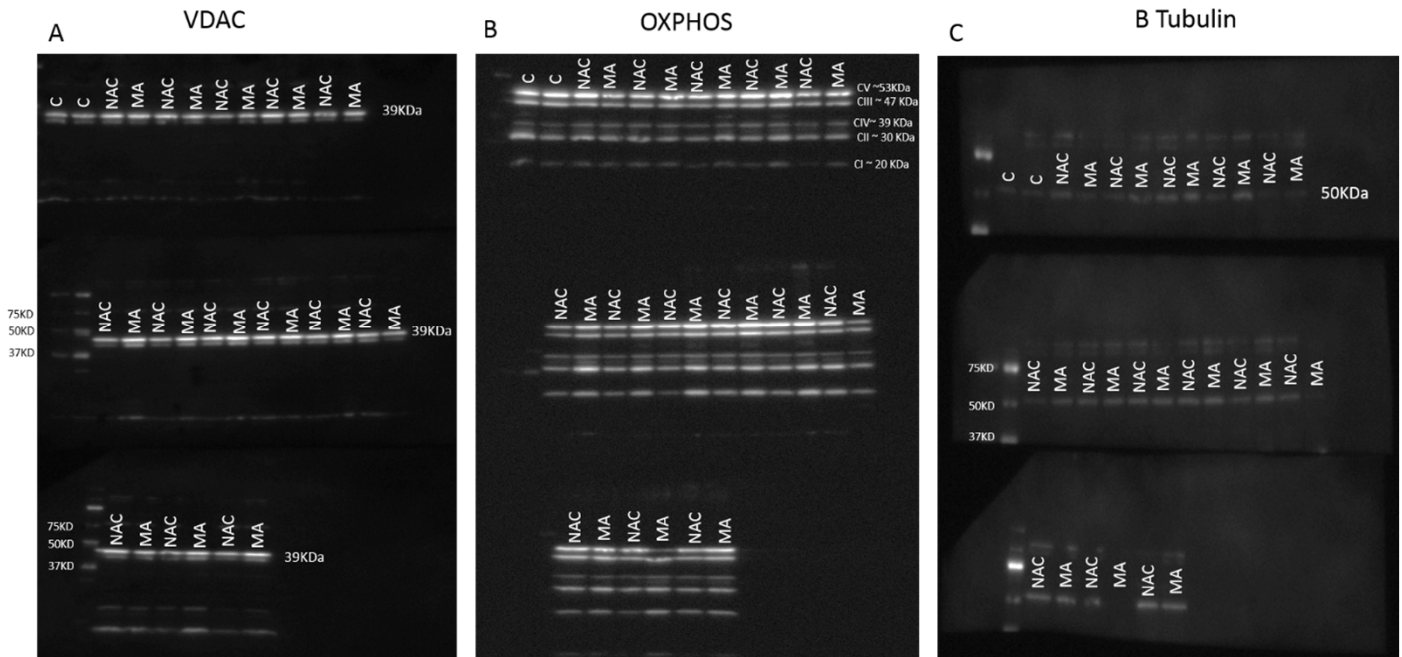

**Figure 3-figure supplement2. Mitochondrial protein quantification.** Mitochondrial protein quantification was performed by immunoblotting of the mitochondrial proteins VDAC (**A**) and the components of the OXPHOS system (**B**). The samples were loaded alternatively i.e. one MA and one NA. Gels held 12 samples plus a pre stained protein standard (161-0375 BioRad). Quantification was performed on images taken with all three gels present. The gels were probed for tubulin (**C**), stripped, then probed for VDAC, stripped again and then probed for the OXPHOS subunits. C = samples of protein from subjects not included in this study.
