# Supplementary material for: Unbiased proteomics, histochemistry, and mitochondrial DNA copy number reveal better mitochondrial health in muscle of high-functioning octogenarians
Source: eLife journal article supplement (doi:10.7554/elife.74335), 2022-04-11
Supplement: supp [file elife-74335-supp-v1.zip]

Figure 3-figure supplement 4

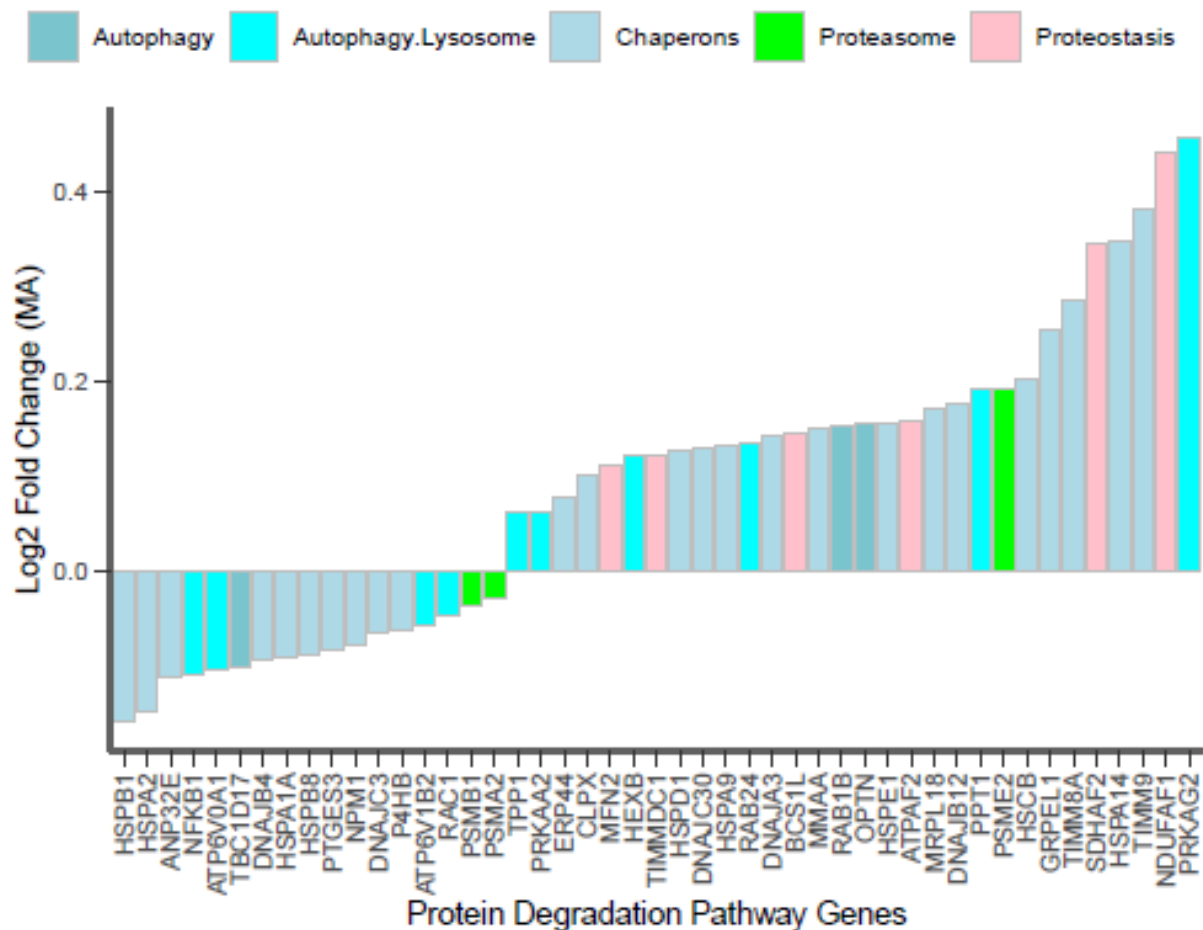

**Figure 3-figure supplement 4:** Autophagy lysosomal system, and ubiquitin proteasome pathway proteins. Expression of significant proteins from autophagy and proteasome pathways are shown for MA vs NA. Each bar is a protein with the corresponding gene name showing decrease in abundance to increase in abundance (left to right). X-axis is the protein, and Y-axis is the log2 FC of the MA proteins. Different categories of the autophagy, proteostasis proteins are color coded.
