# Supplementary material for: Unbiased proteomics, histochemistry, and mitochondrial DNA copy number reveal better mitochondrial health in muscle of high-functioning octogenarians
Source: eLife journal article supplement (doi:10.7554/elife.74335), 2022-04-11
Supplement: supp [file elife-74335-supp-v1.zip]

(a)

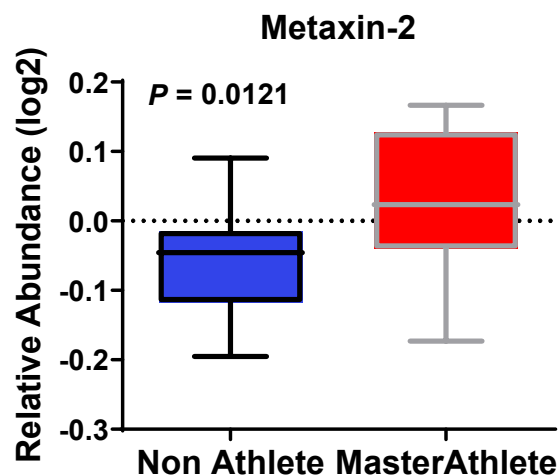

(b)

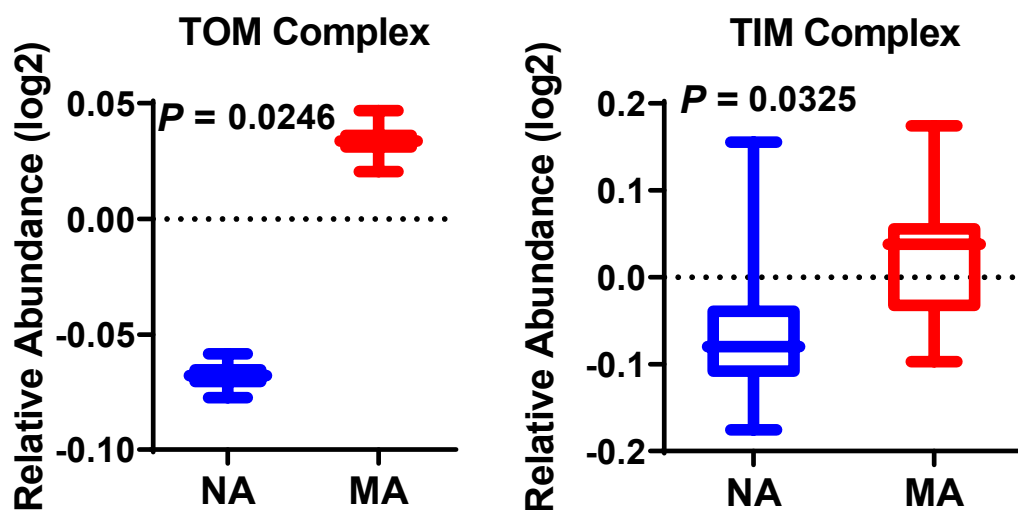

**Figure 3-figure supplement3.** mtDNA enrichment analysis and cristae formation. (a) Relative protein abundance of metaxin. (b) TOM complex and TIM complex. The average expression of all the proteins quantified for TOM complex (TOM22 and TOMM40) and 9 TIM complex proteins are on bottom figure panel.
