# Supplementary material for: Unbiased proteomics, histochemistry, and mitochondrial DNA copy number reveal better mitochondrial health in muscle of high-functioning octogenarians
Source: eLife journal article supplement (doi:10.7554/elife.74335), 2022-04-11
Supplement: supp [file elife-74335-supp-v1.zip]

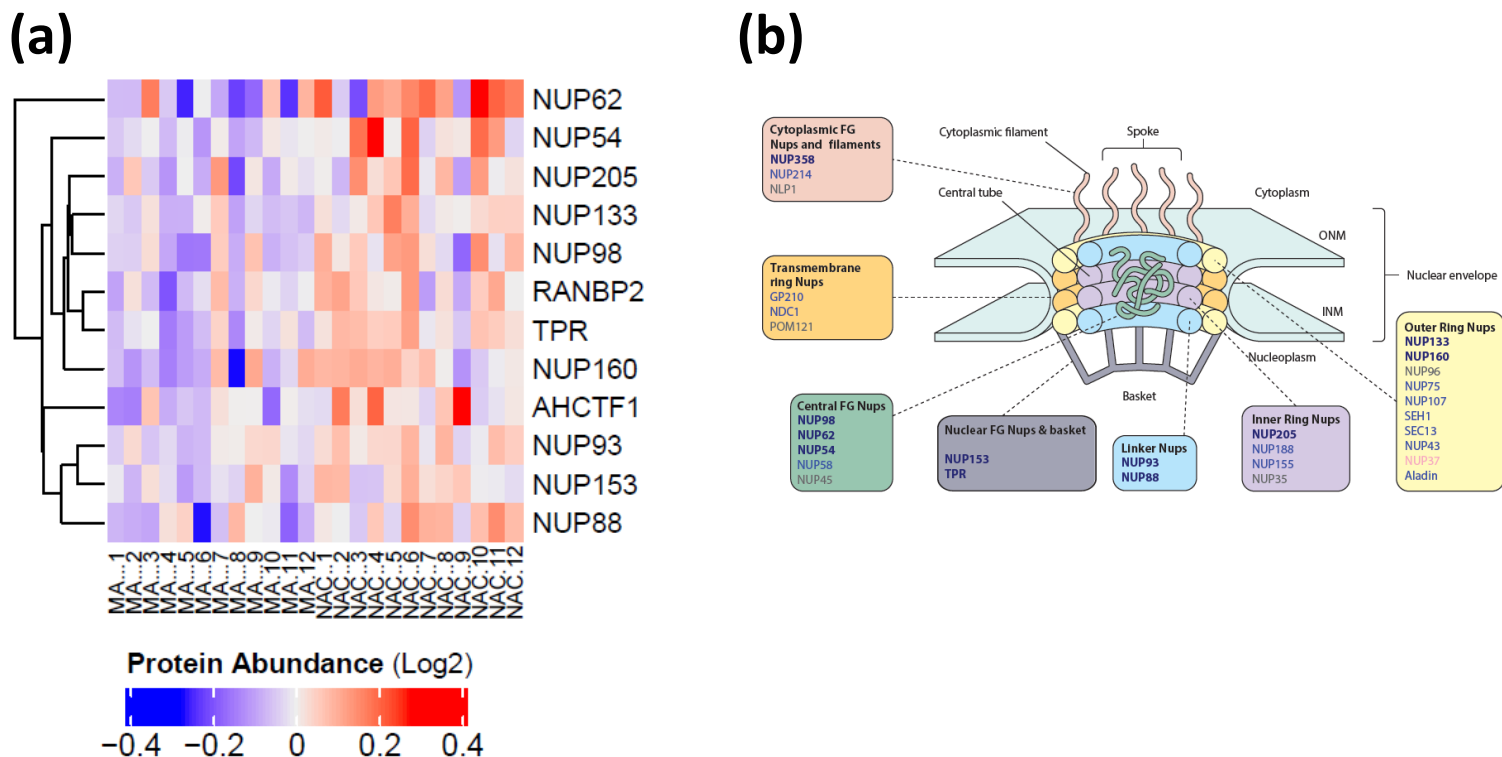

**Figure 3-figure supplement 5:** (a) Nuclear pore membrane proteins. Expression of significant nuclear pore proteins for all donors. The first 12 columns are MA donors followed by NA, The abundance of protein expression is lower in MA versus NA. (b) Underrepresented MA proteins in the nuclear pore structure. Structure of nuclear pore complex (NPC) and the proteins underrepresented showing significant protein coverage for all classes of NPC. Bold blue gene names are significant underrepresented proteins ( $p < 0.05$ ), blue gene names are quantified but not significant ( $p > 0.05$ ) and gray gene names are not detected in the dataset.
