# Supplementary material for: Unbiased proteomics, histochemistry, and mitochondrial DNA copy number reveal better mitochondrial health in muscle of high-functioning octogenarians
Source: eLife journal article supplement (doi:10.7554/elife.74335), 2022-04-11
Supplement: supp [file elife-74335-supp-v1.zip]

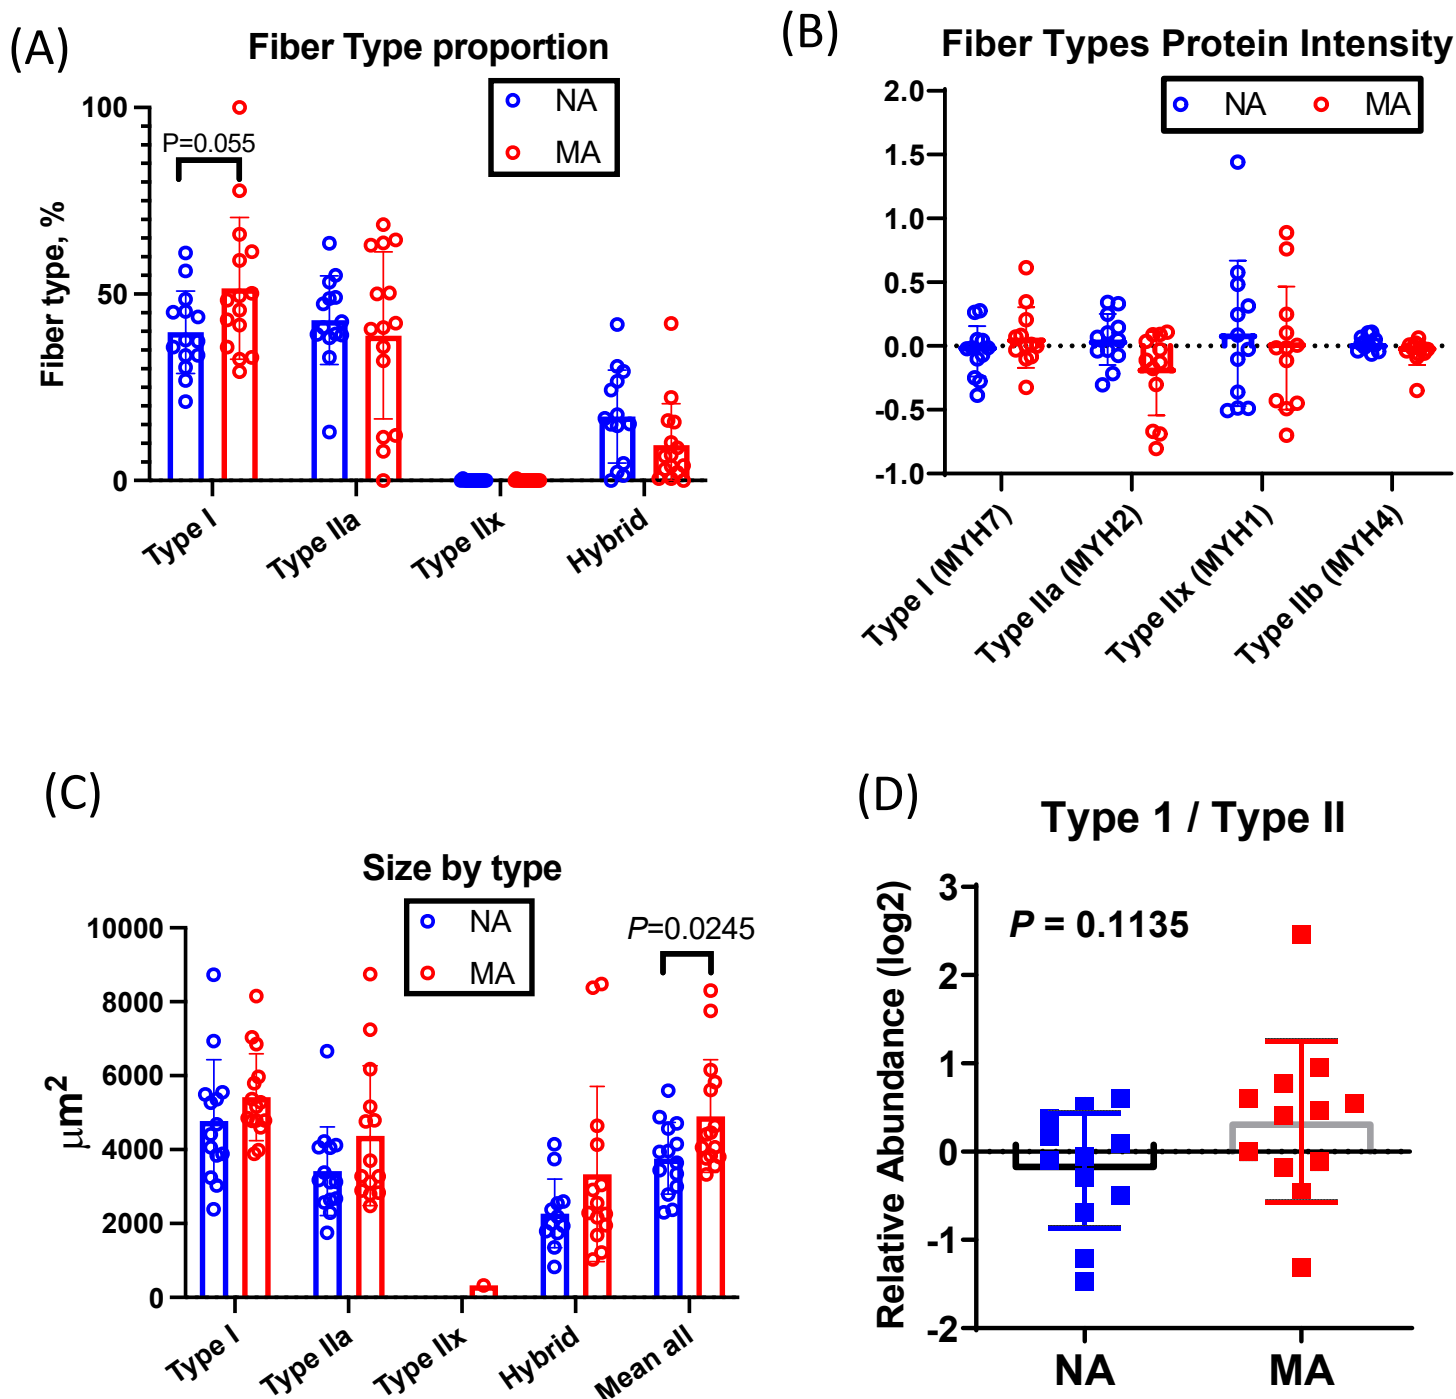

**Figure 1-figure supplement 1. (A) Fiber type quantification.** Fiber type proportion is quantified using immunofluorescence labelling in NA and MA subjects. **(B)** Myosin isoform quantification from the proteomics results from the same subjects. **(C)** Fiber size by type and **(D)** type I to type II myosin protein expression ratio.
