# Supplementary material for: Unbiased proteomics, histochemistry, and mitochondrial DNA copy number reveal better mitochondrial health in muscle of high-functioning octogenarians
Source: eLife journal article supplement (doi:10.7554/elife.74335), 2022-04-11
Supplement: supp [file elife-74335-supp-v1.zip]

**A**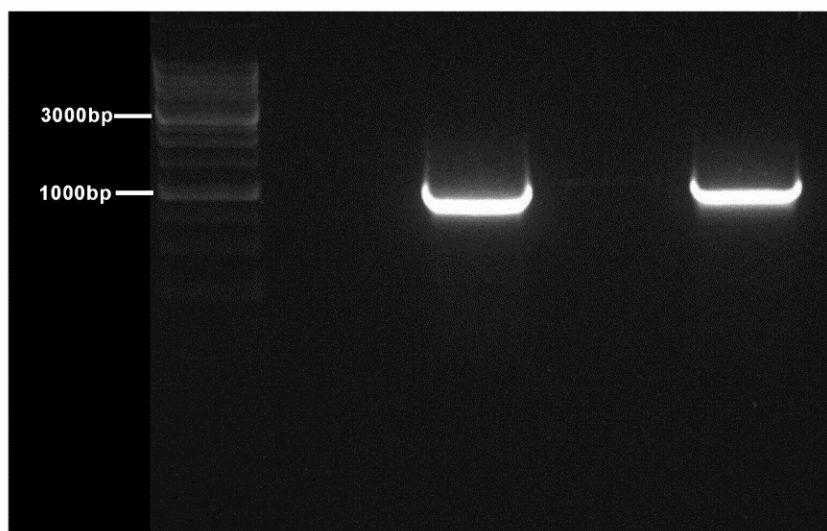**B**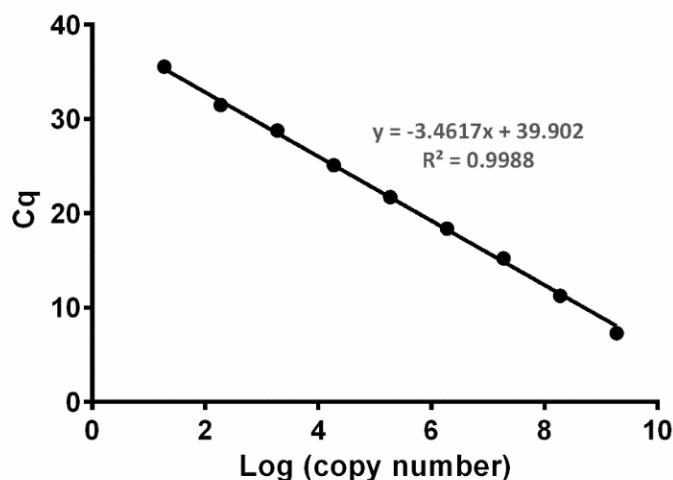

**Figure 3-figure supplement 6. Generating a standard curve in order to determine absolute mtDNA copy number.** A 1011bp fragment (**A**) containing the MTND1 region was amplified and then run (both visible lanes) with a 25K ladder (Diamed). Following separation on a 1% gel the band was extracted using a QIAquick Gel Extraction Kit (Qiagen) and the product quantified using a spectrophotometer. (**B**) The mtDNA fragment was then serially diluted down to generate a standard curve which was then run on a *MTND1* TaqMan® qPCR assay multiple times to generate a consistent line and equation. All subject samples were run at the same time along with the curve in order that their mtDNA copy number could be determined.
