# Supplementary material for: Unbiased proteomics, histochemistry, and mitochondrial DNA copy number reveal better mitochondrial health in muscle of high-functioning octogenarians
Source: eLife journal article supplement (doi:10.7554/elife.74335), 2022-04-11
Supplement: supp [file elife-74335-supp-v1.zip]

Figure 2-figure supplement 1

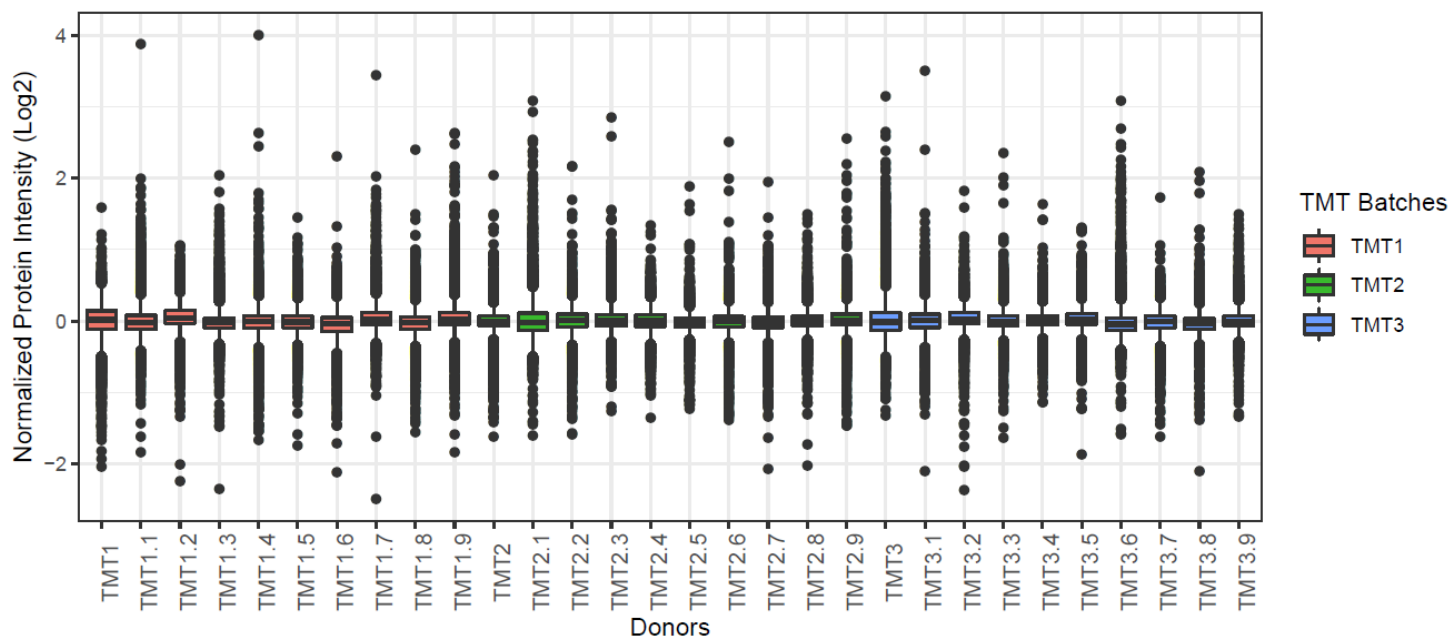

Figure 2-figure supplement 1. Boxplot of all donors from 3 TMT batches. X-axis shows all the donors including repeats and y-axis shows the median normalized log2 protein intensity. Each batch is color coded.
