# Supplementary material for: Unbiased proteomics, histochemistry, and mitochondrial DNA copy number reveal better mitochondrial health in muscle of high-functioning octogenarians
Source: eLife. 2022 Apr 11;11:e74335. doi: 10.7554/eLife.74335 (PMC9090325; doi:10.7554/eLife.74335)
Supplement: Supplementary file 1. [file elife-74335-supp1.xlsx]

## Sheet: MA-NA_BatchNormalizedTMT_1
TMT Batch1- batch normalized log2 protein intensities
Protein Name	MasterAlthlete	MasterAlthlete	MasterAlthlete	MasterAlthlete	NonAthlete	NonAthlete	NonAthlete	NonAthlete
1433B_HUMAN	0.118655	-0.155857	0.0230169	0.0869701	-0.0701409	-0.0259185	-0.010575	0.0658008
1433E_HUMAN	-0.00498384	-0.0413791	-0.0852317	0.00033312	0.159112	-0.00662979	0.0528386	0.0159812
1433F_HUMAN	-0.0268088	0.0247109	-0.099104	0.17612	-0.00377602	0.00377602	-0.0751877	0.0591021
1433G_HUMAN	-0.0175429	-0.0173793	-0.0430567	-0.0750734	0.154177	-0.0286703	0.104298	0.120539
1433T_HUMAN	0.0690816	0.0543702	-0.121136	0.11354	-0.0754524	-0.0980957	-0.0667407	0.286397
1433Z_HUMAN	0.116071	-0.0856822	-0.0485947	0.351734	-0.0175816	-0.132589	-0.0738891	0.0490612
1A02_HUMAN	0.0482935	0.691226	-0.141863	1.61274	0.00626894	0.0922348	0.353197	-0.208965
1A03_HUMAN	-0.0671749	0.0208014	-0.464969	0.3069	-0.67022	0.329393	0.0484357	0.357607
2A5A_HUMAN	-0.0216523	-0.126726	-0.0113302	-0.0504452	0.069318	0.076511	0.0428094	0.0507277
2A5D_HUMAN	-0.0261552	-0.193434	0.00536555	0.115093	-0.146058	-0.0197548	-0.0345101	0.103687
2A5E_HUMAN	-0.0627209	-0.0197218	0.0167388	-0.0226687	0.091517	-0.0227619	0.113803	0.0227057
2A5G_HUMAN	-0.155666	-0.125859	0.363694	-0.0503622	-0.438624	0.0749577	0.27775	0.0348647
2AAA_HUMAN	0.041982	-0.0845517	0.0127473	-0.00740173	0.0625608	-0.0216581	0.0540551	0.00132039
2AAB_HUMAN	0.0861268	-0.075567	-0.0481509	0.0655719	-0.132609	-0.028173	-0.396929	-0.125955
2ABA_HUMAN	0.0461196	-0.0917774	-0.0110463	0.0110463	0.0435461	0.0400847	0.0866705	0.0334223
2B14_HUMAN	-0.162471	-0.345457	-0.138326	1.63293	1.0731	0.133413	0.0227874	0.210543
2B17_HUMAN	-0.126029	1.39184	-0.0132315	0.0132315	1.30424	-0.335015	-0.317294	0.198567
3BP5L_HUMAN	-0.151166	-0.00434142	0.029027	0.0877867	-0.119068	0.00434142	-0.0623672	0.165337
3HIDH_HUMAN	0.100213	-0.0985659	0.312351	0.0549134	-0.0890454	-0.0604758	0.017218	-0.0484022
3MG_HUMAN	0.0735265	-0.0918644	-0.118122	-0.0735265	-0.0742206	0.198797	0.174706	0.118383
41_HUMAN	0.0818327	0.181482	0.101757	0.51466	-0.308989	-0.288994	-0.350422	-0.0402518
4EBP2_HUMAN	0.47111	0.0745966	-0.073948	0.292125	0.07482	-0.38282	-0.234142	-0.296927
4ET_HUMAN	0.0461366	-0.170236	-0.101117	-0.111901	-0.073696	0.136392	-0.0426864	0.00369001
5NT1A_HUMAN	-0.184029	-0.0147925	-0.0369614	-0.0317166	0.000504846	0.038333	0.184856	0.137328
5NT3A_HUMAN	0.0695864	-0.182152	0.00435433	0.230318	0.143909	-0.181303	0.134112	-0.0869091
5NT3B_HUMAN	-0.592853	0.19009	0.272423	0.419943	-0.699069	-0.341031	-0.19009	0.25975
5NTC_HUMAN	0.157238	-0.177936	0.0110332	-0.00614502	0.0129431	0.0671227	-0.132714	0.0533296
5NTD_HUMAN	-0.0172443	0.385649	-0.0487347	-0.0792619	-0.228368	0.039682	0.118231	0.426591
6PGD_HUMAN	0.0471981	-0.00889942	0.0294641	0.197782	-0.00761499	-0.252735	-0.0903916	0.0576894
6PGL_HUMAN	0.0562763	-0.037287	0.037287	0.143262	0.0226936	-0.190977	-0.0366132	0.0510602
8ODP_HUMAN	0.120871	-0.00663727	-0.0920284	-0.0211214	-0.200782	0.00663727	0.241111	0.0937572
A16A1_HUMAN	-0.0983213	0.0413347	0.013981	0.107555	-0.474585	-0.00864887	-0.0325345	0.283006
A16L1_HUMAN	-0.0820669	0.150873	-0.146587	-0.253964	0.195346	0.129834	-0.106352	-0.367573
A1AG1_HUMAN	0.257244	0.611319	-0.339514	-0.160097	0.0214707	-0.293382	0.108558	0.93535
A1AG2_HUMAN	0.384486	0.507309	-0.456918	0.0360868	-0.0360868	-0.26195	-0.0280744	0.777147
A1AT_HUMAN	0.266805	0.478026	-0.120608	0.0473966	-0.0842442	-0.163426	0.163124	0.792777
A1BG_HUMAN	0.283603	0.250523	-0.083301	0.069124	-0.0743942	-0.00949943	-0.122866	0.887182
A2AP_HUMAN	0.122372	0.077977	-0.144628	1.25478	-0.389417	-0.253931	-0.175694	0.301117
A2GL_HUMAN	0.156224	0.357394	-0.162753	-0.214881	0.0168662	-0.158968	0.0490616	0.433548
A2MG_HUMAN	0.0883195	0.435725	-0.26534	0.0195528	-0.0715389	-0.090474	0.183696	1.03342
AAAS_HUMAN	-0.170349	-0.185207	-0.219814	0.0620783	-0.507188	-0.0532339	0.0233569	0.299845
AACT_HUMAN	0.305231	0.540577	-0.158961	-0.018738	-0.0146386	-0.148912	0.0767191	0.540955
AAK1_HUMAN	0.214097	0.193522	-0.107158	0.162576	-0.0814497	0.139093	-0.158817	0.298439
AAKB1_HUMAN	-0.0462673	-0.0529408	0.138255	0.0617514	-0.494497	0.394378	0.171002	-0.120918
AAKB2_HUMAN	0.0627458	-0.0590349	0.0495305	-0.0118109	-0.0511186	-0.0729026	0.059322	-0.0599582
AAKG1_HUMAN	0.131208	-0.04537	-0.0918307	0.0579583	0.0460965	-0.0992059	-0.0182563	0.0226819
AAKG2_HUMAN	0.498392	0.0295436	0.812275	-0.00792867	-0.103792	-0.173674	-0.50059	-0.280336
AAKG3_HUMAN	-0.420046	0.120721	-0.153563	0.0466423	0.659027	-0.145484	0.275017	-0.0807164
AAMDC_HUMAN	-0.212315	0.125041	-0.489892	-0.141503	0.27714	0.199016	0.519761	-0.0501678
AAPK1_HUMAN	0.219971	-0.0764694	-0.0629222	-0.0741408	0.0541969	-0.100615	-0.0211735	0.0260249
AAPK2_HUMAN	0.0378313	0.0241256	0.0835022	-0.00327483	0.0423638	-0.0915926	0.0159821	-0.0902279
AAR2_HUMAN	-0.0142651	-0.0396505	0.0764587	-0.105294	0.0111252	-0.0126034	0.0142651	0.0332029
AASD1_HUMAN	-0.00738593	-0.0188959	0.0688159	-0.000265013	0.191223	-0.148015	0.0188959	-0.082537
AASS_HUMAN	0.484537	-0.186813	0.432931	0.00657671	-0.0969724	-0.0855201	-0.17324	-0.13851
AATC_HUMAN	0.217134	-0.00335732	0.0936815	0.12174	0.153674	-0.414253	0.0251645	-0.0662629
AATF_HUMAN	0.109958	0.453138	-0.125041	0.0160256	-0.217105	-0.0770376	-0.0306236	0.169695
AATM_HUMAN	0.156058	-0.145045	0.257804	0.106671	-0.00708704	-0.177266	-0.0297724	-0.182061
ABCA5_HUMAN	0.025315	-0.00621116	-0.0093529	0.0336677	0.0240097	-0.167221	0.00621116	0.0674379
ABCA6_HUMAN	0.517756	0.493542	-0.542654	-0.00579854	-0.528081	0.696278	-0.225446	0.00918795
ABCA8_HUMAN	0.159117	0.183255	-0.161047	-0.00150711	-0.283435	0.082703	-0.00258325	0.291859
ABCB6_HUMAN	0.0318899	-0.00258393	-0.381638	0.181415	-0.0534096	-0.105559	-0.0157921	0.00981563
ABCB7_HUMAN	0.415009	-0.0839334	0.345785	0.157475	-0.0119363	-0.432722	-0.144695	-0.123953
ABCB8_HUMAN	0.0715141	-0.0377827	0.203565	0.0349225	0.0495444	-0.236742	-0.134863	-0.0349225
ABCBA_HUMAN	0.00943678	-0.243829	0.104655	0.0205921	0.0823467	-0.00518498	-0.0347556	0.0169052
ABCBB_HUMAN	0.621258	0.045839	0.0417842	0.0468574	-0.0785682	-0.0417842	-0.274204	0.0576622
ABCC9_HUMAN	0.068314	-0.155868	-0.0190622	-0.100764	0.043059	-0.011551	-0.0240607	-0.0389087
ABCD1_HUMAN	-0.315535	-0.243613	-0.00703424	-0.138706	-0.150521	0.416367	0.0850179	0.295596
ABCD3_HUMAN	0.0480974	-0.00666563	-0.00496293	0.0349828	-0.138701	-0.102922	-0.0433943	-0.160381
ABCE1_HUMAN	0.083985	-0.112462	0.106648	0.00801344	0.0299321	-0.168972	0.0206958	-0.0465992
ABCF1_HUMAN	-0.0275443	-0.0011082	-0.00483163	-0.0626851	-0.0618777	0.134355	0.00928166	0.0886984
ABCF2_HUMAN	0.0636343	-0.162616	-0.168402	-0.0687196	0.0339066	0.162166	0.122841	0.0212436
ABCF3_HUMAN	0.0895578	-0.0406873	0.0528087	0.0101586	0.0123739	-0.00541803	0.00970231	-0.146696
ABD12_HUMAN	-0.125474	0.117951	0.186623	0.364981	-0.259876	0.0184248	-0.202697	-0.0184248
ABEC2_HUMAN	-0.172591	-0.0276773	-0.151178	-0.118403	0.415391	0.106875	0.101502	0.012428
ABHD4_HUMAN	0.755198	0.338358	0.232819	0.206105	-0.14433	-0.880624	-0.180668	-1.21856
ABHD5_HUMAN	0.243895	-0.189897	0.0916387	0.0407762	-0.234224	-0.0498557	0.117766	0.0157618
ABHDA_HUMAN	0.213716	-0.0667477	0.216532	0.179203	-0.00865148	-0.277316	-0.0731211	-0.116364
ABHDB_HUMAN	0.271229	-0.00925384	0.170322	-0.00391216	0.0611601	-0.207813	-0.0191902	-0.186695
ABHEB_HUMAN	-0.00646206	0.0245596	0.0828447	0.00331818	0.0901961	-0.223322	-0.0609459	0.103705
ABHGA_HUMAN	0.0942357	-0.0349959	0.0191857	0.118773	-1.94e-05	-0.117836	-0.173422	-0.135166
ABI1_HUMAN	-0.264264	-0.162461	0.0051514	0.256484	-0.0963045	0.156669	0.107331	0.212507
ABI3_HUMAN	-0.0684608	-0.0870878	-0.0730261	0.143228	-0.239571	-0.152668	-0.253324	0.32023
ABL1_HUMAN	0.0159423	0.267019	-0.00300989	0.00300989	-0.00587017	-0.0083857	0.00940962	-0.14381
ABLM1_HUMAN	-0.0323827	0.199625	0.0278774	0.0363421	0.0135498	-0.192241	-0.0251956	-0.0261921
ABLM2_HUMAN	-0.0482959	-0.078651	-0.022441	-0.125371	0.0402704	0.0479001	0.0857549	-0.0756838
ABLM3_HUMAN	0.274275	-0.122476	0.828485	0.463104	0.122476	-0.368397	-0.112646	0.23869
ABR_HUMAN	0.195983	-0.327184	-0.286771	0.492159	-0.462077	0.227028	-0.32632	0.208751
ABRA_HUMAN	-0.129575	0.120981	-0.166817	-0.096813	0.00371197	0.182161	0.151882	0.0133994
ABRX2_HUMAN	0.104662	-0.161163	0.0384833	-0.0601265	0.094598	0.0252767	0.0114287	-0.0829573
ABTB2_HUMAN	-0.216313	0.0431952	0.0454041	-0.0902294	0.0326865	-0.360047	0.0164245	0.0673828
ACACB_HUMAN	-0.0110481	0.0884882	0.0904532	-0.120734	0.126056	-0.168089	0.0108922	-0.0812278
ACAD8_HUMAN	0.0928647	-0.0935333	0.2066	0.0726186	0.0151331	-0.135156	-0.0340275	-0.121103
ACAD9_HUMAN	0.119919	0.0637146	0.136599	0.181699	-0.195587	-0.370127	-0.0747705	-0.130341
ACADL_HUMAN	0.166332	-0.192427	0.000641457	-0.17919	0.516978	0.526045	-0.000641457	-0.358938
ACADM_HUMAN	0.0662216	0.0476495	0.098612	-0.0278247	0.0442084	-0.261339	0.0145084	-0.200617
ACADS_HUMAN	0.196428	-0.28879	0.170671	0.26288	-0.182294	-0.422591	-0.12684	0.106212
ACADV_HUMAN	0.348773	-0.143988	0.18213	0.230061	0.0361904	-0.237904	-0.0578998	-0.0812132
ACAP2_HUMAN	0.215082	0.0262906	-0.00108267	0.342326	-0.345039	-0.264447	-0.0305827	0.119555
ACBD5_HUMAN	0.153787	-0.112255	-0.139492	-0.148943	0.0238779	0.22928	0.0863988	-0.0238779
ACBD6_HUMAN	0.0792937	-0.2743	0.165879	-0.131218	0.0614143	-0.0614143	-0.0933639	0.140314
ACBP_HUMAN	-0.172273	0.273607	-0.114397	-0.00149704	0.0336721	0.0809112	0.0305332	-0.778077
ACD10_HUMAN	-0.125602	0.0231925	-0.0342115	0.0353292	-0.112108	-0.141909	0.156923	0.354147
ACDSB_HUMAN	0.175732	-0.186504	0.080786	0.143477	-0.123959	-0.0848323	-0.0201727	-0.153745
ACE_HUMAN	0.168439	-0.00851735	0.014825	0.0258497	-0.0302518	-0.0275436	-0.108746	0.0875642
ACES_HUMAN	0.0494477	-0.171451	-0.0664682	-0.00400292	-0.0463111	0.105458	0.0884338	0.0536683
ACINU_HUMAN	0.0315591	0.0484168	0.0128465	-0.0268823	0.0339473	-0.0663433	0.0433041	-0.0789702
ACL6A_HUMAN	0.000383045	-0.0220374	-0.100527	-0.132656	0.139648	-0.0297803	-0.0466659	0.011794
ACLY_HUMAN	0.06288	-0.0438459	0.0865495	0.251146	-0.257388	-0.283273	-0.248466	0.162832
ACO11_HUMAN	0.320015	-0.208668	0.35066	-0.00159097	0.16489	-0.151206	-0.251988	0.0133138
ACO13_HUMAN	0.148385	0.0921478	0.0235477	0.00457513	-0.0278236	-0.231659	-0.103929	-0.0410073
ACOC_HUMAN	0.147305	-0.0336833	0.0831929	0.205063	0.0358478	-0.22679	-0.0396377	-0.00568221
ACON_HUMAN	0.203837	-0.121325	0.236035	0.0542133	-0.0937709	-0.212925	0.0320318	-0.0750988
ACOT1_HUMAN	0.147021	-0.0237154	0.0670953	-0.196179	0.0236581	-0.195307	-0.0423344	0.0626483
ACOT2_HUMAN	0.177603	-0.0788029	0.106266	0.225362	0.00627878	-0.312252	-0.216066	-0.131895
ACOT8_HUMAN	0.0649775	-0.285966	-0.191951	-0.0936874	0.346765	0.315703	-0.0533622	0.360717
ACOT9_HUMAN	0.171115	-0.0295762	0.251642	0.0587887	-0.107017	0.049735	-0.0288339	-0.208953
ACOX1_HUMAN	0.0874592	-0.0877262	-0.00848554	0.125388	0.0158172	0.00251941	-0.190427	0.00141179
ACOX2_HUMAN	-0.257174	-0.183642	0.358867	0.664369	-0.0296349	-0.0497988	-0.348083	0.735974
ACOX3_HUMAN	-0.0498295	0.017337	0.0173746	-0.0226791	0.16592	-0.0277449	-0.03506	0.409765
ACPH_HUMAN	0.043306	0.0127933	0.0696457	0.0490464	0.0129515	-0.177922	-0.0334497	0.0190395
ACPM_HUMAN	0.452687	-0.133545	0.23649	0.309715	-0.0253452	-0.32268	-0.085656	-0.678259
ACS2L_HUMAN	0.135472	-0.0290747	0.401666	-0.0873744	-0.0313909	-0.0359558	-0.098829	0.0264853
ACSA_HUMAN	0.12174	-0.119527	-0.0951631	-0.132135	0.255969	0.0724719	0.104756	0.0538995
ACSF2_HUMAN	0.429007	-0.0553155	0.151233	0.0114083	0.132139	-0.191594	0.00114744	-0.18971
ACSF3_HUMAN	0.0804078	0.0354319	0.108285	-0.0683735	-0.013957	-0.0801065	-0.107349	-0.0198959
ACSL1_HUMAN	0.183123	-0.128214	0.35585	0.00519172	-0.111135	-0.0397287	-0.0732671	-0.0672795
ACSL3_HUMAN	-0.147047	0.0519829	-0.0546201	-0.112137	0.138564	0.2452	-0.00673353	-0.016155
ACSL4_HUMAN	0.0421493	-0.0207106	-0.00461765	0.137068	-0.142792	-0.018353	-0.0987074	0.036091
ACSL5_HUMAN	0.304085	-0.133485	-0.0683392	0.279217	-0.22214	0.267869	-0.0680389	0.0680389
ACSL6_HUMAN	-0.00207554	-1.32413	0.719295	0.66315	0.00207554	-1.10875	0.0386491	-0.43356
ACSS3_HUMAN	0.118977	0.0975193	0.0770716	0.162573	-0.100209	-0.190076	-0.148632	-0.0509131
ACTA_HUMAN	0.00121555	0.0398505	0.0417889	-0.158558	-0.0532859	0.251186	-0.00956935	0.0498963
ACTB_HUMAN	0.127025	-0.0326965	-0.235493	0.824708	-0.296154	-0.0248349	-0.208119	0.14187
ACTBL_HUMAN	-0.0110737	-0.0269451	-0.0645349	-0.0283179	0.0777405	-0.00524163	0.00848385	-0.0221247
ACTBM_HUMAN	-0.243601	0.214128	-0.0532696	-0.0171503	0.149598	-0.201421	0.145612	-0.014027
ACTG_HUMAN	0.0741823	0.0568842	-0.136376	0.414496	-0.474507	-0.0324467	-0.0688077	0.555055
ACTN1_HUMAN	0.0301289	-0.0269766	-0.239677	0.0180127	0.0283554	0.0802625	-0.00833853	0.0735973
ACTN2_HUMAN	0.00523623	-0.107822	-0.029783	-0.0519454	0.00888536	0.116029	0.0260869	0.00445067
ACTN3_HUMAN	-0.535696	0.499246	-0.562559	-0.217796	0.688724	0.0660716	0.183801	-0.208524
ACTN4_HUMAN	0.161959	0.246876	-0.298729	0.059838	-0.229915	0.155726	-0.179544	0.39991
ACTS_HUMAN	-0.0549734	-0.0440227	-0.016786	-0.0676571	0.0322384	0.156547	0.0626913	-0.0396928
ACTY_HUMAN	-0.090296	-0.0290824	-0.0783425	-0.1032	0.180398	-0.00838664	0.0230944	0.0895737
ACTZ_HUMAN	-0.0935554	-0.062479	-0.00278402	-0.0104967	0.0684882	0.0241902	0.0232107	-0.00822957
ACV1C_HUMAN	-0.0702935	-0.419562	0.126039	-0.0295582	0.171479	0.0295582	-1.43202	0.217688
ACY1_HUMAN	-0.105089	-0.020222	0.0940385	0.0958445	0.105587	-0.269954	0.0489294	0.0236006
ACY2_HUMAN	0.0345115	0.00721283	0.0976549	-0.00324349	0.202181	-0.414567	-0.0742218	0.0525031
ACYP1_HUMAN	0.188576	-0.0767764	0.203393	0.0640775	-0.277412	0.0386297	-0.0386297	-0.117075
ACYP2_HUMAN	0.0594125	-0.108261	-0.158191	-0.24481	0.170164	0.00975825	0.405601	0.0985515
ADA_HUMAN	0.0970401	-0.0254514	0.100202	0.141153	0.0380777	-0.377863	0.185608	0.0836649
ADA10_HUMAN	0.244784	-0.00375975	-0.263596	0.457782	-0.114225	0.00162377	-0.0708206	0.0208529
ADAL_HUMAN	0.230639	-0.10112	0.214419	0.27239	0.0446825	-0.102656	0.0450027	-0.0513397
ADAM9_HUMAN	-0.155783	0.113091	-0.211714	0.00690511	0.168244	0.118739	-0.178141	-0.0570924
ADAS_HUMAN	-0.0491855	-0.120883	-0.01005	0.0322795	0.0387265	-0.0306719	0.0722484	0.0582696
ADCK1_HUMAN	0.119151	0.0863126	-0.00938429	-0.088135	0.0577498	-0.103813	-0.257731	-0.215368
ADCK2_HUMAN	0.172226	-0.170987	0.456414	0.263574	-0.521206	-0.704846	-0.731484	0.322692
ADCK5_HUMAN	0.541945	-0.00330348	-0.004537	0.0158859	-0.428249	0.00787845	0.083408	-0.0721951
ADCY2_HUMAN	-0.0509538	-0.171752	-0.0189426	0.0175228	-0.0913257	-0.00642233	-0.0151562	0.282759
ADCY6_HUMAN	0.493342	-0.10108	0.10108	0.576112	-0.437989	-0.259257	-0.165171	0.504981
ADCY9_HUMAN	0.0601603	0.0542803	0.0967354	-0.0501218	-0.189336	-0.0390991	-0.00625471	-0.114988
ADDA_HUMAN	0.0349864	0.0488682	0.0140437	0.371062	-0.219937	-0.203175	-0.156883	0.0141819
ADDB_HUMAN	0.0987424	0.0687544	0.0575968	0.388228	-0.335056	-0.240001	-0.236468	-0.0194154
ADDG_HUMAN	0.107071	0.127267	-0.0951089	-0.00863029	-0.0910014	0.0362236	-0.0468216	0.220101
ADH1B_HUMAN	0.273433	0.0691126	-0.0812443	0.174672	0.21696	-0.266848	-0.200736	0.109602
ADH1G_HUMAN	0.0110606	-0.139991	0.00482616	0.0522868	0.710007	-0.219971	0.857293	0.360374
ADHX_HUMAN	0.163785	-0.121402	-0.0755448	0.0318713	0.233604	-0.0784511	0.166649	-0.0110773
ADIPO_HUMAN	0.0966245	0.0309549	-0.17749	-0.185512	0.103481	0.042819	0.0481695	0.0133328
ADIRF_HUMAN	0.092981	-0.102891	-0.135302	0.00973083	0.227046	-0.100984	-0.00973083	0.898568
ADK_HUMAN	-0.00748758	-0.00197072	0.0712379	0.0399225	-0.058398	-0.20077	0.0233765	-0.00586396
ADPPT_HUMAN	-0.00331734	0.00331734	0.0350092	0.0456793	0.0858678	-0.278459	0.133325	0.0838694
ADPRH_HUMAN	0.0618964	0.0878815	-0.0400675	-0.237649	0.288242	-0.122988	-0.189064	-0.0779192
ADRM1_HUMAN	0.0511105	-0.260346	-0.0196216	0.0244364	-0.0115005	0.338828	-0.00595413	-0.11365
ADRO_HUMAN	0.00276936	-0.073962	0.109577	-0.0210444	0.0682847	-0.00229278	-0.177734	-0.0696448
ADT1_HUMAN	0.397619	-0.136454	0.517649	0.210434	-0.0403366	-0.312878	-0.0563391	-0.220643
ADT2_HUMAN	0.110246	-0.0279561	0.10549	0.280901	-0.131826	0.0240544	-0.119091	-0.123283
ADT3_HUMAN	0.052764	-0.158678	0.226507	0.140047	-0.651789	-0.05687	-0.205306	-0.00563182
ADX_HUMAN	-0.0526436	0.0333531	0.111161	0.258197	-0.605084	-0.166707	0.132137	-0.0333531
AEBP1_HUMAN	0.0373639	0.307987	-0.0884248	-0.00207822	-0.157281	0.135157	0.0149065	-0.178767
AEDO_HUMAN	0.00536895	0.0251825	-0.255147	-0.112267	0.225959	0.150636	0.0361385	-0.00536895
AES_HUMAN	0.278086	-0.0711199	0.199118	-0.0996452	0.0711199	0.13254	-0.15213	-0.156045
AFAD_HUMAN	0.100462	0.14985	-0.137628	0.104373	-0.160553	0.0975224	-0.0665524	0.198858
AFAM_HUMAN	0.177586	0.235839	-0.185865	0.0259966	0.060744	-0.297301	-0.00518535	0.897551
AFG1L_HUMAN	0.473188	-0.228133	0.244827	-0.00637346	0.00238554	-0.0985655	-0.0485813	-0.125959
AFG32_HUMAN	0.0766649	-0.11745	0.190834	0.0318308	-0.0610828	-0.0874216	-0.0414766	-0.136192
AGAL_HUMAN	0.070871	0.0286633	0.147607	0.12215	-0.479616	-0.307385	-0.212702	-0.0552402
AGAP3_HUMAN	0.0385524	0.0396733	0.0677561	-0.0385524	-1.54014	-0.500763	0.041354	-0.373249
AGFG1_HUMAN	0.0491007	-0.0486887	0.190952	-0.00613209	-0.182549	-0.173297	0.0349513	0.0709317
AGK_HUMAN	0.0874585	0.000884169	0.157967	-0.000884169	-0.121669	-0.0737436	-0.00263958	-0.231827
AGM1_HUMAN	0.0853009	-0.124688	-0.130601	0.0420511	0.0477959	0.0163463	-0.0350007	-0.00941812
AGO1_HUMAN	0.10357	-0.00690703	-0.181081	0.00146376	0.418107	0.0782238	0.0322609	-0.104476
AGO2_HUMAN	-0.0602303	0.0333884	0.00920395	0.169226	-0.0664702	-0.046992	-0.0276044	0.0156396
AGO3_HUMAN	0.158596	-0.101389	-0.167332	-0.0365367	0.0753326	0.0570619	0.083946	0.0134889
AGO4_HUMAN	0.223907	-0.0444117	0.0651028	-0.102039	0.0733832	-0.0413197	-0.00830766	-0.00570234
AGRIN_HUMAN	0.195995	0.0626211	-0.175937	-0.0397549	-0.0490468	0.120094	-0.111926	0.513262
AHNK_HUMAN	0.0394866	0.0989836	-0.138619	-0.118803	-0.037866	0.133857	-0.00284279	0.197665
AHNK2_HUMAN	0.148965	0.993232	-0.566562	-0.217046	-0.039826	0.178979	0.039826	0.443023
AHSA1_HUMAN	0.213733	-0.0680897	-0.0821859	-0.047086	0.0932551	-0.0656591	0.0281608	0.109395
AHSP_HUMAN	0.183216	0.00962995	0.556921	0.665471	-0.511564	-0.228101	-0.481659	-0.0583011
AIDA_HUMAN	-0.0678289	0.108802	-0.0471454	0.0798376	0.160521	-0.0976477	-0.137434	-0.00811911
AIF1_HUMAN	-0.0889644	-0.0721268	-0.126166	0.716118	0.269971	-0.346405	0.0721268	0.28338
AIF1L_HUMAN	0.171413	-0.0753426	0.23917	0.0602901	-0.307359	0.253495	-0.181947	-0.10785
AIFM1_HUMAN	0.0612092	-0.0918377	0.151344	0.0192995	0.0204729	-0.105666	0.0122472	-0.144589
AIFM2_HUMAN	0.0338397	0.00577255	0.0369783	-0.0743095	-0.121586	0.111206	0.108254	-0.00577255
AIMP1_HUMAN	0.071176	-0.0563072	0.0169339	0.028422	0.00406234	0.00459307	-0.0375498	-0.0933129
AIMP2_HUMAN	-0.0491438	0.0199836	-0.0105137	-0.0193258	-0.00801375	-0.0100784	-0.0068925	-0.145485
AIP_HUMAN	0.101275	0.0598796	-0.0161648	-0.0516917	-0.179741	-0.0222219	0.0883768	0.312823
AK1A1_HUMAN	0.0321858	-0.121479	-0.0138731	0.0141064	0.128039	-0.0570193	-0.240811	0.138702
AK1BF_HUMAN	-0.00142131	0.00142131	-0.443664	0.253179	0.383326	-0.218067	0.656082	-0.266466
AK1C1_HUMAN	0.50718	0.149955	0.399921	-0.0812656	0.0929006	-0.591865	-0.340349	-0.157948
AK1C2_HUMAN	0.704196	0.0564069	0.0574656	0.0596165	-0.279346	-1.0931	-0.250133	0.165461
AK1C3_HUMAN	0.434512	-0.0557498	0.14058	0.0162058	0.173209	-0.438908	-0.417896	0.207177
AKA12_HUMAN	0.14462	0.0416779	-0.248461	0.0514203	-0.0817436	0.0686414	-0.0290352	0.270599
AKA7G_HUMAN	0.0551763	0.127129	0.418108	0.320965	-0.125387	-0.247849	0.0057358	-0.154769
AKAP1_HUMAN	-0.0297381	-0.128106	0.204383	0.0248646	-0.0439454	0.108282	-0.170631	0.015331
AKAP2_HUMAN	0.223572	-0.0725059	-0.103376	0.139412	-0.00240337	0.142035	-0.0803268	0.0668948
AKAP6_HUMAN	0.0623686	-0.0193418	-0.083959	0.177768	0.0176582	0.0101399	-0.144644	-0.00556345
AKAP8_HUMAN	-0.0423553	0.042992	0.144758	-0.0518521	0.0650421	-0.339717	0.136834	-0.0185174
AKAP9_HUMAN	0.1049	0.000701289	-0.0180151	-0.114621	0.117908	0.020145	-0.0326261	-0.012085
AKP13_HUMAN	-0.239004	0.0280296	-0.0198535	-0.179616	0.042073	-0.00253072	0.103807	0.0553065
AKP8L_HUMAN	0.148035	0.139113	0.0610868	0.123322	0.238019	-0.0773898	-0.179317	-0.0879644
AKT1_HUMAN	0.298442	-0.0374793	0.046203	0.120915	0.0778423	-0.170248	0.0349767	-0.0138315
AKT2_HUMAN	0.0592018	-0.0138914	-0.00453253	0.0116304	0.0116931	-0.0483219	0.0780986	0.0707569
AKTIP_HUMAN	0.151865	-0.122206	0.06922	-0.00193387	-0.424505	-0.0705876	0.0836395	-0.0370037
AKTS1_HUMAN	-0.237224	-0.245913	-0.0665858	-0.114046	0.187713	0.51213	0.0416859	0.0056415
AL1A1_HUMAN	-0.0264604	0.0546088	-0.109065	0.10806	0.163981	-0.122513	0.17974	-0.00689239
AL1A2_HUMAN	-0.0413962	-0.0527881	0.179871	0.304933	0.0279229	0.114089	-0.235315	-0.136353
AL1A3_HUMAN	0.186639	0.115199	-0.151392	0.0487002	0.0548572	-0.0526671	0.288323	0.0926213
AL1B1_HUMAN	0.0478807	0.0432703	0.771309	-0.104033	0.113738	-0.267509	-0.333608	0.120509
AL1L1_HUMAN	-0.0300268	-0.0763252	0.203371	-0.0486663	0.250461	-0.385866	0.0687691	-0.0915899
AL1L2_HUMAN	0.693926	0.0890222	1.08033	0.47423	-0.0749207	-0.958167	0.0749207	-0.169581
AL3A2_HUMAN	-0.367147	-0.0297062	0.221405	0.0137584	0.0435074	-0.0163731	0.0156926	0.00628923
AL4A1_HUMAN	0.230006	-0.265863	0.177584	-0.0227545	-0.0388711	-0.0685961	-0.0364959	-0.0228913
AL7A1_HUMAN	0.317226	-0.16793	0.328095	0.182873	-0.189368	-0.0721534	-0.154162	0.282651
AL9A1_HUMAN	-0.0492897	-0.142873	-0.104455	-0.0456376	0.224448	0.0279171	0.279691	0.0343245
ALAT1_HUMAN	0.122857	-0.087949	0.10436	0.123115	-0.0580066	-0.258423	-0.0210196	0.0612887
ALAT2_HUMAN	0.158938	-0.0758597	0.278751	-0.0284817	-0.0449304	-0.16801	-0.211952	0.050782
ALDH2_HUMAN	0.190731	-0.246152	0.204145	-0.0024203	-0.074443	-0.0405358	-0.115896	0.0141131
ALDOA_HUMAN	-0.134075	0.157776	0.0446724	-0.0852924	0.319219	-0.110586	0.151831	-0.0554494
ALDOC_HUMAN	-0.0858557	0.141714	-0.0177388	-0.110679	0.351813	-0.0578385	0.127491	-0.0783022
ALDR_HUMAN	0.0362484	-0.0263065	-0.00717572	0.0553712	0.0407007	-0.200423	0.233607	0.0111136
ALG1_HUMAN	-0.193364	-0.00593845	0.127325	0.118713	-0.347539	-0.284145	0.123514	0.00593845
ALG11_HUMAN	-0.0180189	0.278633	-0.03435	0.0797709	-0.0785654	-0.0193112	-0.204123	0.049284
ALG2_HUMAN	-0.176506	0.473006	-0.292301	-0.0473226	0.00828801	-0.00828801	-0.0256135	-0.167113
ALG5_HUMAN	0.044081	-0.00979511	0.00689981	0.0954026	-0.0366287	0.00979511	-0.0908936	-0.0559074
ALG9_HUMAN	-0.328472	-0.0212767	0.230515	-0.0561839	0.00910466	-0.266869	-0.00910466	0.443193
ALKB5_HUMAN	0.259631	0.116208	-0.26193	-0.266982	0.397593	0.2935	-0.225251	0.0128039
ALPK2_HUMAN	0.330042	0.0446834	-0.272246	-0.0446834	0.134209	0.344353	-0.297999	-0.19013
ALPK3_HUMAN	0.0393868	-0.0106711	-0.0141529	-0.0439436	0.00694549	0.130257	0.0247021	-0.0868284
ALR_HUMAN	0.0233859	-0.205715	0.0842569	-0.0506722	0.00419857	-0.0600896	0.10423	-0.0713646
ALS_HUMAN	0.183144	0.0779239	-0.0849194	0.0487755	-0.0278703	-0.51965	-0.226458	0.155407
ALS2_HUMAN	-0.12284	0.0867533	0.0549703	-0.0914136	0.164785	0.00511632	0.109887	-0.0719287
AMBP_HUMAN	0.0779458	0.38933	-0.291456	0.00343118	0.00167783	-0.151843	0.189537	0.25087
AMFR_HUMAN	-0.0142651	0.0700592	0.240535	0.295165	0.0142651	-0.0427206	0.358908	-0.123565
AMPB_HUMAN	0.0369845	-0.000354929	-0.00887393	-0.0779402	0.0108679	0.0201509	0.124859	0.0065095
AMPD1_HUMAN	-0.343911	0.0368828	-0.325674	0.0764704	0.219018	-0.250449	0.037169	0.0308523
AMPD3_HUMAN	0.470586	-0.363446	-0.194508	0.170585	0.143303	-0.155765	-0.229738	-0.166804
AMPL_HUMAN	0.0885547	-0.17325	0.0279636	0.163626	0.0109164	-0.0897684	-0.0158335	-0.0294772
AMPN_HUMAN	-0.155514	0.159421	0.181089	0.155514	-0.571941	-0.592056	-0.611747	0.333573
AMRP_HUMAN	-0.312461	0.0504973	-0.0444928	-0.376835	0.309831	0.185253	0.0968339	-0.0228387
AMZ2_HUMAN	0.301527	-0.142007	-0.667114	-0.0718991	0.362506	0.108126	0.271891	0.219692
AN13A_HUMAN	-0.12442	-0.148399	0.109468	0.207455	0.126778	-0.146461	-0.117413	0.00583004
AN32A_HUMAN	0.0949346	-0.130645	-0.0611352	0.0285656	-0.00615386	0.143343	-0.35083	-0.273513
AN32B_HUMAN	0.0245805	-0.326176	0.00163849	0.0119806	-0.303703	0.140485	0.0303965	0.165407
AN32E_HUMAN	0.000412975	0.0269522	-0.143391	0.00421609	0.0526791	-0.0419677	0.244206	-0.0737143
ANFY1_HUMAN	0.00354246	0.0461041	0.00574368	0.00702487	0.154266	-0.0314925	-0.164882	0.108668
ANGI_HUMAN	-0.0468151	0.222265	-0.110088	-0.0365861	-0.00418425	-0.0991554	-0.107919	0.0453447
ANGL2_HUMAN	-0.322056	0.622455	0.000167692	-0.07221	-0.202332	0.0646707	-0.194885	0.0689259
ANGT_HUMAN	0.15349	0.118813	-0.339139	0.269222	-0.120657	-0.1395	-0.0102725	0.652512
ANK1_HUMAN	0.0698699	0.209071	0.02563	0.573644	-0.276225	-0.24938	-0.274793	-0.0225428
ANK2_HUMAN	0.0539058	0.0355447	0.0108142	-0.0120413	0.0233409	-0.0311882	-0.211324	-0.00178074
ANK3_HUMAN	-0.00579062	-0.0422446	-0.00794356	-0.0844357	0.104075	0.0252446	0.0485275	-0.0416901
ANKR1_HUMAN	0.290252	0.858172	-0.330429	-0.0174021	0.393223	0.0174021	-0.023697	-0.424177
ANKR2_HUMAN	0.272868	-0.236973	0.0884483	-0.278453	0.18207	-0.00464745	0.400768	-0.216795
ANKY2_HUMAN	-0.0361065	-0.210958	0.102247	0.0899157	0.110675	-0.180888	0.103484	0.000387512
ANM1_HUMAN	0.550681	-0.167277	-0.247955	0.298944	0.459013	-0.284978	0.0365165	0.264455
ANM5_HUMAN	0.0320526	-0.00305899	0.0355146	0.0771173	0.00230047	-0.0399703	-0.00170304	-0.0907136
ANM7_HUMAN	0.0789078	0.154128	-0.279201	0.0245576	0.116267	-0.119216	-0.385551	0.019245
ANO10_HUMAN	0.0519758	0.0323118	-0.251364	0.0245219	-0.0808758	0.0365141	-0.0819994	0.231453
ANO6_HUMAN	-0.0151179	0.070447	-0.128669	0.120848	0.134359	-0.109443	-0.00689022	-0.178004
ANR17_HUMAN	-0.442136	0.528516	-0.283437	-0.0803148	-0.659028	0.329918	0.380034	-0.320208
ANR23_HUMAN	-0.257503	0.483373	-0.435753	0.477576	-0.641568	-0.183575	0.0958199	-0.0413168
ANR28_HUMAN	0.152681	0.104501	-0.0757543	0.11481	0.320734	-0.268062	-0.287887	-0.0234003
ANR35_HUMAN	-0.243302	0.0168537	-0.404387	-0.0615869	0.188888	0.0644679	0.0948141	0.196325
ANR39_HUMAN	-0.242346	-0.121789	-0.228799	0.156035	0.270897	0.0433278	-0.0433278	0.0858819
ANR44_HUMAN	0.13624	-0.438266	-0.272921	0.570088	-0.263372	-0.200471	0.483487	0.45551
ANS1A_HUMAN	0.237101	0.126577	-0.183608	0.60234	-1.13384	-0.398125	-0.00939968	0.00939968
ANT3_HUMAN	0.147625	0.177114	-0.0723125	0.159611	-0.0899398	-0.137815	-0.0369047	0.382006
ANX11_HUMAN	-0.00462616	0.0095356	0.0711536	0.0126949	0.0523609	-0.00818141	-0.0445097	-0.0119966
ANXA1_HUMAN	0.15351	0.240165	-0.244459	0.137871	-0.127824	-0.0664362	-0.0738969	0.210847
ANXA2_HUMAN	0.0860919	0.318671	-0.110573	-0.0134463	-0.0677374	0.0722754	-0.0208003	0.187997
ANXA3_HUMAN	0.0466665	-0.165081	-0.0180543	0.0850916	0.00842811	-0.131124	-0.150974	0.0942933
ANXA4_HUMAN	0.0734138	0.0614376	-0.041394	-0.0038637	-0.0872516	0.0552939	-0.0816205	0.153169
ANXA5_HUMAN	0.21293	-0.564718	-0.20132	0.269419	0.267624	-0.140812	0.095839	0.374211
ANXA6_HUMAN	-0.000353444	-0.000808963	-0.0731491	-0.00540743	0.125794	-0.0504396	0.118887	0.131984
ANXA7_HUMAN	0.0411688	-0.0208647	-0.0259827	0.00366129	0.053352	-0.0308807	0.093389	-0.00290575
AOC3_HUMAN	0.147712	0.380906	-0.146604	-0.188569	-0.205719	0.115184	-0.0770284	0.319208
AOFA_HUMAN	-0.0273511	0.176948	0.115819	-0.0666499	-0.300157	-0.141034	0.112052	-0.0306832
AOFB_HUMAN	0.116473	-0.0670833	0.00935484	0.0436372	-0.0611867	-0.0419754	0.106975	-0.0269
AOXA_HUMAN	0.0175001	-0.144409	-0.128773	0.0411897	0.00961873	0.220044	-0.136334	-0.0242787
AP1B1_HUMAN	0.0188103	-0.0253437	0.00295705	0.125258	-0.102363	-0.0359979	-0.0372536	0.0407878
AP1G1_HUMAN	0.0105676	-0.155842	-0.0632597	0.120028	0.0211705	0.0100402	-0.0398546	0.0456968
AP1M1_HUMAN	0.157674	-0.035774	-0.0960482	0.13458	0.221828	0.0265297	-0.0441143	0.116575
AP1S2_HUMAN	-0.0699902	-0.230877	0.0824336	-0.0340192	0.0223467	0.239482	0.115081	-0.0812875
AP2A1_HUMAN	-0.000117303	-0.0427334	-0.00557034	0.185178	-0.166016	-0.112898	-0.0986464	0.186886
AP2A2_HUMAN	0.0628175	-0.023521	-0.0136565	-0.0224113	-0.0213558	-0.00461202	-0.102376	0.0818529
AP2B1_HUMAN	0.115146	0.00621992	-0.0552076	0.126172	-0.169646	0.0046262	-0.137559	0.0517843
AP2M1_HUMAN	0.181274	0.00702165	-0.231698	0.210365	0.010706	-0.168644	0.0739827	0.0293961
AP2S1_HUMAN	0.661146	0.0561602	-0.0561602	0.68383	-0.573654	-0.365847	-0.455256	0.0828659
AP3B1_HUMAN	-0.0270111	-0.0127499	-0.0454467	0.0616347	0.0204682	0.0121545	0.0200432	-0.0750035
AP3D1_HUMAN	0.150358	0.151857	-0.130842	-0.0328925	0.0775609	-0.0313546	-0.155487	0.0935422
AP3M1_HUMAN	-0.0513258	-0.000672749	-0.162214	-0.0205684	0.00766132	0.0339568	0.093126	-0.0117525
AP4A_HUMAN	-0.0315525	-0.0729299	-0.0738097	0.251403	0.218621	-0.383346	0.0759214	-0.00266009
AP4B1_HUMAN	0.0703062	-0.317344	-0.0395687	0.0764334	0.0464563	-0.172968	0.0998064	-0.0685064
AP4E1_HUMAN	0.0325266	-0.0211161	-0.0934528	0.178273	0.261122	-0.0151097	-0.086715	0.0151097
AP4M1_HUMAN	0.0336421	-0.0421139	-0.160828	-0.0384106	-0.0381418	0.122294	-0.157184	0.116541
AP4S1_HUMAN	-0.0585681	0.087721	-0.137656	-0.0401568	0.582259	-0.0508032	-0.463706	0.404214
AP5S1_HUMAN	0.161047	-0.0348717	0.0464248	0.15917	0.075788	0.122644	-0.0843921	-0.317085
AP5Z1_HUMAN	-0.0416347	-0.18317	0.254105	0.0841896	-0.116317	0.176064	-0.136651	0.0416347
APBB1_HUMAN	0.196015	-0.0124602	-0.245222	-0.252239	0.364466	0.22222	0.0124602	-0.477913
APBB2_HUMAN	0.253863	0.208371	-0.111487	0.087916	-0.110835	-0.161551	-0.284225	0.4468
APC1_HUMAN	-0.270645	0.397122	0.0824856	0.119969	-0.0824856	-0.611053	-0.141652	0.243002
APC16_HUMAN	-1.25907	0.159605	-0.159605	-0.266277	0.305723	-0.221434	0.401316	0.841505
APC7_HUMAN	0.0343837	-0.180557	-0.0132491	-0.162254	-0.446897	0.0488104	0.0301353	0.0132491
APEX1_HUMAN	0.0605625	-0.104566	-0.00185834	0.0445435	-0.0809095	-0.106235	0.0877442	0.0519708
API5_HUMAN	0.0948935	-0.0185602	-0.0370351	-0.107843	0.00957659	-0.0573245	0.0527589	0.0749566
APMAP_HUMAN	-0.0114733	0.0858001	-0.0234287	0.024716	-0.39041	-0.0113206	0.000168095	0.183212
APOA_HUMAN	-0.17746	0.13586	-0.32557	-0.0197022	-1.47669	-0.22254	0.141862	0.119739
APOA1_HUMAN	0.506885	0.460344	-0.260813	0.00594957	-0.0767984	0.0202388	-0.0620852	0.994742
APOA2_HUMAN	0.479296	0.522033	-0.116934	0.293733	-0.0832881	-0.00200478	-0.0747388	0.810512
APOA4_HUMAN	0.283315	0.186397	-0.0786147	-0.0488348	0.0971398	-0.1296	-0.0928801	0.594463
APOB_HUMAN	0.193404	0.630121	-0.271261	-0.123865	-0.103208	0.0645548	0.113879	0.662057
APOC1_HUMAN	0.0555748	0.0978215	-0.106834	0.0236611	-0.0236611	-0.0101103	-0.26422	1.14909
APOC3_HUMAN	-0.367476	-0.0101046	-0.158741	0.0938686	0.0615902	0.587537	0.293175	-0.0258657
APOD_HUMAN	0.204056	0.353844	-0.167326	0.00513328	-0.0894646	-0.0436357	0.0225646	0.385871
APOE_HUMAN	0.0512568	0.270327	-0.248782	0.11786	-0.302798	-0.046501	-0.0257812	0.688357
APOF_HUMAN	0.284749	0.482285	-0.176113	-0.249844	-0.040761	-0.0220175	-0.00700113	0.677966
APOH_HUMAN	0.232641	0.556377	-0.0192908	-0.0720208	-0.0883158	0.111842	-0.158881	0.684357
APOL1_HUMAN	0.528035	0.42917	-0.185041	0.0866474	-0.00393281	-0.092507	0.012095	1.10774
APOL2_HUMAN	-0.482076	0.347166	-0.64187	-0.211973	0.307082	0.136723	-0.454782	-0.168818
APOM_HUMAN	0.468232	0.252193	0.155027	0.0416322	-0.51589	-0.235807	-0.0416322	0.407331
APT_HUMAN	0.020245	-0.117518	0.0611943	0.033051	-0.00337416	-0.177718	-0.0195957	0.0639231
APTX_HUMAN	-0.0905549	-0.241225	0.389547	0.296377	-1.44123	-0.0839419	0.0839419	0.173916
AQP1_HUMAN	-0.0312457	0.0239318	0.0521178	0.314531	-0.277756	-0.0694814	-0.0842658	-0.0251857
AQP4_HUMAN	-0.395432	0.208665	-0.367283	-0.418243	0.058142	0.0386153	0.12455	-0.0990211
AQR_HUMAN	0.189307	0.292103	-0.108427	-0.187401	-0.0225818	-0.0608288	-0.0588686	0.297864
AR6P4_HUMAN	-0.0214696	-0.118098	0.0382925	-0.00419526	0.186437	0.0237571	-0.331061	-0.142534
ARAF_HUMAN	-0.0294023	0.00889189	0.0423296	0.0257429	0.0193312	0.0122653	0.00587597	0.00477706
ARAP1_HUMAN	0.245571	-0.007494	0.0481418	0.0826393	-0.0480586	-0.0357197	-0.0672801	-0.0016789
ARBK1_HUMAN	0.0722268	-0.0734944	-0.058793	-0.00688408	0.0230724	0.04948	-0.28363	-0.0029519
ARC1A_HUMAN	0.10662	-0.226251	-0.0158774	-0.0395851	0.157681	0.10019	-0.000996987	0.121751
ARC1B_HUMAN	0.321076	0.0171046	-0.0469651	0.650547	-0.179429	-0.0234481	-0.166134	0.0752498
ARCH_HUMAN	0.0430425	0.199489	-0.155394	0.00625471	0.138491	-0.236953	0.119072	-0.00625471
ARF3_HUMAN	-0.496603	-0.851893	0.104176	-0.867076	0.987893	-1.45221	0.479904	0.858752
ARF4_HUMAN	0.106898	0.0278501	-0.228484	0.197252	0.0211443	-0.102516	-0.106476	0.0568384
ARF5_HUMAN	0.117955	-0.0670131	-0.0915226	-0.00700129	0.027943	0.0705294	-0.0752183	0.0387583
ARF6_HUMAN	0.0757374	0.0489524	0.00425251	-0.114215	0.0246074	-0.0896887	0.0488731	0.0661858
ARFG1_HUMAN	0.109043	-0.0102959	-0.0395397	0.181226	-0.00476958	0.0380969	-0.143358	0.120331
ARFG2_HUMAN	0.0391967	-0.0770901	0.0729235	0.076468	0.00822404	-0.158952	-0.0250217	0.0506293
ARFG3_HUMAN	-0.00502309	-0.0139314	-0.14563	0.0195843	0.00502309	-0.106067	0.0206855	0.0283846
ARFRP_HUMAN	-0.017329	0.171327	-0.132172	0.017329	-0.017348	0.0799169	0.0765522	0.196628
ARGAL_HUMAN	-0.0130072	-0.0807386	-0.0148497	0.0319273	0.128111	-0.209688	0.0231066	0.121932
ARGI1_HUMAN	0.0762417	-0.0669937	0.628035	0.343312	-0.357293	-0.439849	-0.480653	0.033361
ARGI2_HUMAN	-0.000161562	0.000161562	-0.28478	0.0461846	-1.48075	-0.520603	0.0780121	0.372765
ARHG1_HUMAN	-2.24198	-1.33712	0.0601522	-0.918609	0.64461	-1.46412	0.250996	1.02711
ARHG2_HUMAN	0.123972	-0.111511	-0.1194	-0.00718891	-0.0852288	0.0506654	-0.0709455	0.131511
ARHG6_HUMAN	0.12822	0.0194829	0.0791225	0.0104597	-0.334346	0.196607	-0.115056	-0.0104597
ARHG7_HUMAN	-0.0041207	0.0286711	-0.143399	-0.146187	0.10024	0.0407033	-0.0507437	0.119935
ARHGA_HUMAN	0.0194883	0.612503	-0.345314	-0.572228	-0.179505	0.150647	-0.0194883	0.200522
ARHGB_HUMAN	0.0467955	-0.0898971	0.00544595	-0.110764	0.0593809	0.0698591	-0.0151669	0.00988374
ARHL1_HUMAN	-0.0168881	-0.00607553	-0.182946	0.0779767	0.396698	-0.20427	0.104528	0.0391121
ARHL2_HUMAN	-0.0165198	-0.0164247	0.205062	0.127888	0.0703976	-0.273299	0.0289231	-0.0812365
ARI1_HUMAN	0.0230291	-0.0421477	-0.0456483	-0.0070371	0.305241	-0.0884348	0.0401601	0.0125035
ARI1A_HUMAN	0.142021	-0.329618	-0.15151	-0.0463238	0.174353	0.26565	0.175686	-0.478305
ARI1B_HUMAN	-0.54031	-0.21463	-0.279089	0.153871	-0.761427	-0.131527	0.140092	0.574672
ARI2_HUMAN	0.15436	-0.0452663	-0.0505817	0.00480175	0.257357	-0.0149753	-0.0341279	-0.108816
ARK72_HUMAN	0.202497	-0.0448656	0.00223198	0.0531471	-0.0626891	-0.056666	-0.0467322	0.0853802
ARL1_HUMAN	0.425296	-0.0584078	-0.120926	0.136032	0.226046	3.62e-06	0.0271388	0.214607
ARL15_HUMAN	0.0375051	0.0230722	0.139731	0.0548852	-0.101743	-0.0798906	-0.184073	0.00403376
ARL2_HUMAN	0.200677	-0.238269	0.0491575	-0.0192606	-0.0152852	-0.00391475	0.0152852	-0.0821022
ARL3_HUMAN	0.0634342	-0.00429137	0.00429137	0.131639	0.0449198	-0.0593631	-0.0222511	0.162342
ARL8A_HUMAN	-0.107674	-0.135678	-0.117391	-0.0406994	0.00822571	0.0939722	0.112057	0.0823352
ARL8B_HUMAN	-0.146837	-0.0617276	-0.261729	0.228819	-0.0816804	0.245553	0.18029	0.0208912
ARLY_HUMAN	0.101427	-0.138692	0.141513	0.245101	-0.0987991	-0.110876	-0.219668	0.127218
ARM10_HUMAN	0.0141582	0.00945913	0.138155	-0.398472	0.198133	-0.0461311	0.0508905	-0.0362594
ARMC1_HUMAN	0.190913	-0.164032	0.140769	-0.00937625	-0.0582166	0.0157747	0.0560881	-0.203265
ARMC6_HUMAN	0.0556019	0.0251281	-0.00531557	0.0566295	-0.0888144	-0.0184755	0.0724082	-0.0878175
ARMC8_HUMAN	0.0159936	-0.199687	-0.0120811	-0.00999834	-0.19295	0.100424	-0.114201	0.0372727
ARMT1_HUMAN	0.164362	-0.0115148	-0.0385841	0.0618931	0.113326	-0.120662	0.132008	0.0020279
ARMX1_HUMAN	-0.0366808	-0.213568	0.167169	0.179485	-0.0562182	0.0450791	-0.0107644	0.0766141
ARMX2_HUMAN	-0.120786	-0.00939896	-0.146186	0.146186	-0.0175939	-0.0451552	-0.0725778	0.0759928
ARMX3_HUMAN	-0.0161475	0.064934	0.00396654	-0.0131044	-0.164125	-0.28576	-0.718375	0.00579371
ARP10_HUMAN	0.0906604	0.0785907	-0.0270556	-0.151074	-0.0367775	-0.0117996	-0.0474684	0.00877666
ARP19_HUMAN	-0.172209	0.117347	-0.00851405	-0.159284	-0.0499533	0.14008	-0.0572568	-0.012536
ARP2_HUMAN	0.087449	-0.0937866	-0.0711359	0.285134	-0.0957348	-0.0432895	-0.166415	0.0901504
ARP21_HUMAN	0.0797339	-0.0736579	0.0126357	-0.0126357	-0.0130543	-0.122665	-0.0366789	0.218943
ARP3_HUMAN	0.0253017	-0.0179047	-0.0692833	0.201819	-0.0488103	-0.0706928	-0.0979347	0.0442157
ARP5L_HUMAN	-0.0201012	-0.210392	0.0599812	-0.00222643	-0.109194	0.145678	0.0421513	0.0201012
ARP6_HUMAN	0.213101	-0.141092	-0.324131	0.205084	-0.0112788	0.373427	0.0112788	-0.184482
ARPC2_HUMAN	-0.0793266	-0.109057	-0.0458175	0.246339	-0.0288773	-0.107674	0.0205941	0.229055
ARPC3_HUMAN	0.0104932	-0.0493508	-0.0134195	0.381111	-0.407923	0.0189103	-0.0104932	0.205908
ARPC4_HUMAN	0.252417	0.0228006	-0.227412	0.236825	0.131463	-0.0247405	-0.0651593	0.225357
ARPC5_HUMAN	0.0890297	-0.0280117	-0.039832	0.665113	-0.239886	-0.0890297	-0.127881	0.0184375
ARPIN_HUMAN	0.0364785	-0.0724351	-0.0647274	-0.0573176	0.127744	0.197533	-0.0406391	0.287339
ARRB1_HUMAN	0.0922741	-0.0131549	-0.0146373	0.178842	-0.425544	0.0113731	-0.738546	0.314602
ARRD1_HUMAN	0.139464	0.0804893	-0.126903	-0.0233682	-0.236992	0.0233682	0.163001	0.300269
ARSB_HUMAN	0.428466	-0.107049	0.115777	0.331528	-0.0645719	-0.26889	-0.295533	-0.0327672
ARVC_HUMAN	-0.234667	-0.112489	-0.0476602	-0.358924	0.0169464	0.169617	0.00521576	0.0536797
ARY1_HUMAN	-0.306633	0.239058	-0.211293	0.357055	-0.0165322	-0.858942	-0.830431	0.6635
AS3MT_HUMAN	0.342602	0.0304971	-0.0158551	0.0658192	0.00229347	-0.0944805	0.0311939	-0.00229347
ASAH1_HUMAN	0.220785	-0.0432197	-0.0501116	0.0758877	-0.084108	-0.284491	0.0169325	-0.164491
ASAP1_HUMAN	0.1843	-0.00186876	-0.0426948	0.324559	0.00186876	-0.12003	-0.122671	0.196916
ASAP3_HUMAN	-0.25835	-0.269897	-0.0385045	-0.383151	0.0385045	0.250958	0.0715795	0.162729
ASB1_HUMAN	0.185828	-0.0338277	0.0321158	-0.336342	0.091239	-0.0739567	-0.201846	0.0452819
ASB10_HUMAN	-0.0356293	-0.186663	-0.162367	0.115069	0.225177	-0.0390451	0.0390451	-0.0249059
ASB11_HUMAN	-0.0347986	0.0164782	0.0647604	0.0520187	0.0191051	-0.23336	-0.218784	0.0155961
ASB12_HUMAN	0.0962077	-0.0756519	-0.147129	0.1731	0.171871	-0.140972	-0.373114	0.0756519
ASB14_HUMAN	-0.0962669	0.0248254	0.0527599	-0.0825034	-0.0292969	-0.0676309	0.0292969	-0.197291
ASB15_HUMAN	0.0581257	-0.144871	-0.0935116	0.0448319	0.0787748	-0.217488	-0.118421	0.172717
ASB16_HUMAN	-0.160326	0.26132	-0.123977	-0.304341	0.984352	-0.195755	0.232574	-0.139343
ASB2_HUMAN	-0.0433419	-0.00215293	0.0225854	0.0360514	-0.149944	-0.0308676	-0.0559772	-0.0220368
ASB5_HUMAN	0.0228914	-0.0269831	0.182345	0.357674	-0.141288	-0.251585	0.00525881	-0.0116021
ASB8_HUMAN	0.520309	0.0562565	-0.0562565	0.425542	-1.04985	-1.00717	-0.655762	0.218777
ASCC3_HUMAN	0.440146	-0.177385	0.0679524	0.0939182	-0.612065	-0.168814	-0.0137662	-0.537366
ASGL1_HUMAN	0.0204007	-0.250961	0.341213	0.294388	-0.106218	-0.0204007	-0.3954	0.237813
ASH2L_HUMAN	0.0565581	0.0225796	-0.0560714	-0.143491	-0.00308015	0.197829	0.112439	0.204202
ASML_HUMAN	0.150393	0.0580949	-0.119442	0.641189	-0.0634668	-0.335561	0.191668	0.103025
ASNA_HUMAN	-0.0702359	0.00780566	0.0433561	0.012586	-0.0439264	-0.0137873	0.00316126	0.0627155
ASPC1_HUMAN	0.0139754	0.0253624	-0.0470954	-0.149688	0.0680465	-0.234929	0.195454	0.0851174
ASPG_HUMAN	0.0103583	-0.476485	-0.0968731	0.0445238	-0.404989	-0.0957748	0.102168	-0.0103583
ASPH_HUMAN	-0.00615766	0.0467824	-0.0667583	-0.181069	0.10813	0.0762396	-0.00581078	0.0393868
ASPM_HUMAN	-0.853051	-0.191242	0.643114	-0.526502	0.456843	0.805459	0.0849775	-0.0849775
ASPN_HUMAN	-0.0262287	1.07156	-0.251431	0.096601	-0.306786	0.0334457	-0.00126742	0.321537
ASSY_HUMAN	0.355537	-0.511396	0.258361	0.263589	0.12687	-0.0561298	-0.405901	-0.0162354
AT11A_HUMAN	-0.0147471	0.0147471	0.107243	-0.0324438	0.0934677	-0.151837	-0.305776	-0.11106
AT131_HUMAN	-0.163369	0.0535195	-0.0231908	0.0485649	-0.177233	0.1414	-0.108197	0.00721374
AT1A1_HUMAN	0.0821543	0.0186713	0.0343316	-0.0460534	-0.0228673	0.0208422	-0.0663502	-0.045234
AT1A2_HUMAN	-0.0671804	-0.0411113	-0.0282646	-0.0620546	-0.0161297	0.0453615	0.0161297	0.0395436
AT1B1_HUMAN	-0.1299	-0.0558287	-0.0243552	-0.107017	0.0234643	0.196757	0.104453	-0.0157245
AT1B3_HUMAN	-0.0638903	0.143967	-0.0435361	0.157554	-0.281985	0.0638903	0.013236	0.476704
AT1B4_HUMAN	-0.0153917	-0.315491	-0.100029	-0.100023	-0.000709817	-0.00378357	0.285907	0.163536
AT2A1_HUMAN	-0.406722	0.201816	-0.0620982	-0.359691	0.225472	-0.0411544	0.200019	-0.0560045
AT2A2_HUMAN	0.162436	-0.26255	-0.0780481	0.0581215	-0.019031	0.114211	-0.048356	0.0623281
AT2A3_HUMAN	0.0393441	-0.0189527	-0.11075	-0.0749814	0.0179944	0.0262377	0.128132	-0.00377326
AT2B1_HUMAN	0.0144783	0.00261929	0.106016	-0.0152048	0.00444406	-0.0912525	-0.33726	-0.0328673
AT2B2_HUMAN	-0.333583	0.174579	-0.307932	-0.389366	0.184628	0.0422677	0.155764	-0.0800005
AT2B4_HUMAN	0.0250723	0.0202902	-0.0646519	0.060043	-0.240281	0.0126915	-0.229499	0.112101
AT2C1_HUMAN	0.0484551	-0.0660695	0.227829	0.490073	-0.336311	0.00108443	-0.0229398	-0.0367654
AT2L2_HUMAN	-0.00928283	-0.0440442	0.0602579	0.00885949	0.371222	-0.209091	0.117939	-0.0108155
AT5F1_HUMAN	0.346316	-0.119294	0.347639	0.261706	-0.118528	-0.199004	-0.0252625	-0.162453
AT8A1_HUMAN	0.120912	-0.0776617	-0.0240236	0.000248791	0.0888767	-0.0400043	0.0222267	-0.075874
ATAD1_HUMAN	0.1549	-0.0975278	0.309282	0.203859	-0.213711	-0.157985	-0.174303	-0.110053
ATD3A_HUMAN	0.0881876	-0.095528	0.142759	-0.0373262	0.00195213	-0.0453162	0.0594781	-0.0454522
ATD3B_HUMAN	0.152503	-0.0750654	0.25084	0.00975378	0.0395395	0.127931	-0.00975378	-0.153158
ATD3C_HUMAN	-0.232762	-0.385318	-0.192399	0.0480258	0.154967	0.147032	-0.163448	0.248689
ATE1_HUMAN	0.00787354	-0.189952	-0.0323957	-0.00787354	0.154979	0.0263873	0.105391	0.0117018
ATG2A_HUMAN	0.404877	-0.0334209	-0.161119	0.111219	0.362878	-0.267581	0.0334209	-0.0473821
ATG2B_HUMAN	0.104062	0.043959	-0.113616	-0.0287814	-0.302797	0.0943902	-0.0593915	0.0287814
ATG3_HUMAN	-0.0304279	-0.0621725	0.127722	0.130048	-0.0221937	-0.439829	-0.134054	0.0304279
ATG4A_HUMAN	0.112888	-0.018809	-0.107987	0.0565845	0.175264	-0.231659	0.00594348	0.0133724
ATG4B_HUMAN	0.165035	-0.069528	0.0232795	0.0923225	0.241691	-0.175695	-0.0486069	0.143722
ATG5_HUMAN	0.197522	-0.0192244	-0.112836	0.0846236	0.0881332	-0.0817845	-0.0767718	0.0324237
ATG7_HUMAN	-0.0463944	-0.0951039	0.0108512	0.139521	-0.0116375	-0.0519608	0.00743339	-0.0757971
ATG9A_HUMAN	0.0404833	0.0637435	-0.207036	0.0160068	-0.063662	-0.0171696	0.0450429	0.0344771
ATL4_HUMAN	-0.325882	0.0143298	-0.068518	-0.114135	0.151499	-0.0143298	-0.310258	0.0435627
ATLA2_HUMAN	0.0130732	0.213851	-0.137379	-0.128287	0.1061	-0.0261553	-0.0430608	0.00653686
ATLA3_HUMAN	0.274181	0.411528	-0.239725	0.151904	-0.298929	0.125371	-0.203363	0.34897
ATM_HUMAN	0.110124	0.0362158	0.188688	-0.0362158	0.207532	-0.273742	-0.216107	-0.314798
ATOX1_HUMAN	-0.498389	1.08726	0.0855805	0.835933	-0.0807212	0.0155709	-0.311025	0.300693
ATP23_HUMAN	0.0998894	-0.017124	0.017124	0.133619	0.144658	-0.256025	-0.498779	-0.34092
ATP5H_HUMAN	0.391169	-0.0974669	0.31575	0.207442	-0.0487988	-0.270845	-0.0576911	-0.133575
ATP5I_HUMAN	0.380474	-0.0848582	0.315633	0.136865	-0.0569191	-0.129278	-0.0393554	-0.124512
ATP5J_HUMAN	0.0056495	-0.421941	0.139706	1.503	-1.44738	-0.0056495	-0.0983103	0.380034
ATP5L_HUMAN	0.399554	-0.11806	0.459932	0.283833	-0.0787205	-0.275865	-0.0702937	-0.0870637
ATP5S_HUMAN	0.314898	-0.0282627	0.214921	0.00250297	-0.039282	-0.205359	-0.0425953	-0.172505
ATP6_HUMAN	0.742252	-0.0939649	0.376713	0.590663	-0.140737	-0.200261	-0.142997	-0.184714
ATP9A_HUMAN	-0.0598906	0.163331	-0.13514	-0.0927097	-0.25471	0.0933058	0.0580468	0.448193
ATPA_HUMAN	0.316988	-0.0889518	0.329169	0.159376	-0.0523324	-0.183474	-0.0859567	-0.125127
ATPB_HUMAN	0.242924	-0.0717808	0.252544	0.157562	-0.0674617	-0.19374	-0.0763344	-0.114637
ATPD_HUMAN	0.186627	-0.0199918	0.224875	0.176202	-0.0161778	-0.142657	-0.121943	-0.0641282
ATPF1_HUMAN	0.31076	-0.0572931	0.361502	0.193996	-0.0901568	-0.0881728	-0.0592397	-0.157333
ATPF2_HUMAN	0.163751	-0.0662137	0.206778	0.0634396	-0.0425009	0.0375389	-0.0990199	-0.365254
ATPG_HUMAN	0.264125	-0.0713672	0.290672	0.186501	-0.0592149	-0.206496	-0.05601	-0.101057
ATPK_HUMAN	0.537444	-0.0978157	0.409496	0.228222	-0.108326	-0.288127	-0.0101131	-0.21317
ATPO_HUMAN	0.269119	-0.0563055	0.34307	0.12812	-0.074151	-0.234713	-0.127346	-0.119672
ATRN_HUMAN	0.340929	0.316145	-0.560477	-0.244378	0.309362	-0.119906	0.119906	0.963225
ATRX_HUMAN	-0.106481	-0.0358284	-0.0914211	0.0747239	0.222941	0.107219	-0.638079	-0.649011
ATX10_HUMAN	0.0785771	0.0162739	-0.019852	0.000571733	0.0537506	-0.167387	-0.0580156	0.0480145
ATX2_HUMAN	0.0523546	0.0683109	-0.0880497	-0.00570009	0.181116	-0.0434502	-0.00237607	0.00919636
ATX2L_HUMAN	0.0231037	0.0339099	0.221954	-0.00657797	-0.117098	-0.0574941	-0.0611748	-0.0309429
AUHM_HUMAN	0.395622	-0.0652332	0.507426	0.510735	0.0297001	-0.291581	0.0398028	-0.112713
AUP1_HUMAN	-0.262411	0.020659	0.0693123	-0.0101367	-0.80822	-0.190988	-0.171848	-0.00386437
AVEN_HUMAN	-0.0124121	-0.0623128	0.0115268	-0.0422478	0.129009	0.0199669	-0.0918521	0.0254371
B2CL1_HUMAN	0.0374558	-0.330659	0.0164892	0.162479	-0.508407	-0.0164892	0.163259	-0.29519
B2L13_HUMAN	0.0572238	-0.167412	0.169908	0.10164	-0.0830408	-0.0229438	-0.0113722	-0.0741084
B2MG_HUMAN	-0.140579	0.0764232	-0.158086	-0.068721	0.108255	-0.230663	0.276317	0.0746615
B3AT_HUMAN	0.0800104	0.165971	0.0621609	0.58035	-0.29955	-0.280213	-0.229384	-0.0633227
B3GA3_HUMAN	0.209923	-0.0662528	-0.00857756	0.382259	-0.384598	-0.154493	0.00857756	-0.244505
B3GL2_HUMAN	-0.144934	0.0749977	0.0323628	-0.00490624	0.031873	0.221163	-0.0926549	-0.0624302
BABA1_HUMAN	-0.00272497	-0.0573536	-0.00827586	-0.0428311	-0.00215327	0.115571	0.0428311	-0.0482844
BABA2_HUMAN	0.143874	-0.0960729	-0.00444251	0.0231191	-0.0582803	-0.0260934	-0.0329864	-0.145751
BACH_HUMAN	0.193935	0.132868	0.107399	0.0597491	-0.100015	-0.757022	-0.503516	-0.0597491
BAF_HUMAN	-0.173914	-0.157515	0.100964	-0.0230331	0.111444	0.158884	0.0683654	-0.334902
BAG1_HUMAN	0.0679296	-0.184281	-0.0236112	0.00106101	0.0978049	-0.205313	-0.105111	0.075548
BAG2_HUMAN	-0.00887121	-0.0138922	-0.0251423	-0.0317367	0.117642	0.00693011	-0.0372178	0.0210884
BAG3_HUMAN	0.0600468	-0.0415398	0.00857309	-0.0710357	0.0379911	0.0572248	0.0104584	-0.122164
BAG5_HUMAN	-0.0054821	-0.078262	0.0883308	-0.0147029	0.0262094	0.109843	-0.0543358	-0.096432
BAG6_HUMAN	0.0636926	-0.0527794	0.0440921	0.0165838	-0.0234784	-0.0176829	-0.0368443	0.0426118
BAK_HUMAN	-0.0825795	-0.0937636	0.202328	0.108879	-0.122804	0.252354	0.127575	-0.193913
BAP18_HUMAN	0.206956	-0.0443798	-0.206516	-0.039699	0.0316084	0.0651219	-0.221643	-0.112066
BAP29_HUMAN	-0.181649	-0.000526029	0.000526029	-0.208314	0.230394	0.502855	0.262027	0.132831
BAP31_HUMAN	-0.165112	-0.100107	-0.129761	0.0425754	0.128642	0.58667	0.36029	-0.0425754
BASI_HUMAN	0.0523978	0.0193411	-0.00277358	-0.0393784	-0.0269169	-0.00376151	-0.0497914	-0.181642
BASP1_HUMAN	0.111788	0.115227	-0.30325	0.261847	-1.00717	-0.406561	-0.111788	0.267307
BAX_HUMAN	-0.134595	0.318103	-0.032625	-0.0839286	0.032625	-0.484358	0.153532	0.339661
BAZ1B_HUMAN	-0.0235784	0.122444	-0.038542	-0.0994328	-0.122018	0.0500161	0.00820098	0.0235784
BCAM_HUMAN	0.183985	0.202071	-0.147886	0.108521	-0.0944185	0.0156918	-0.149043	0.256918
BCAR1_HUMAN	-0.0824009	-0.379129	-0.133619	-0.0391928	0.412688	0.279734	0.118799	0.0391928
BCAS3_HUMAN	0.219607	-0.176649	0.0523231	-0.126085	0.24205	0.000986536	-0.228319	-0.00945908
BCAT2_HUMAN	0.478931	-0.1907	0.331227	0.0542173	-0.0537773	-0.0942173	-0.12725	-0.040317
BCCIP_HUMAN	0.14359	-0.0208985	0.209421	-0.14421	-0.0726964	-0.0436093	0.106095	0.18808
BCDO2_HUMAN	0.271604	-0.0680307	0.457892	0.317702	-0.0440475	-0.499253	-0.447621	-0.0774705
BCKD_HUMAN	0.184061	-0.0843181	0.115439	0.121314	0.0310587	0.0832898	-0.0491016	-0.132178
BCL2_HUMAN	-0.371217	0.196127	-0.0431223	0.491964	0.0777535	-0.315506	-0.164009	0.357776
BCLF1_HUMAN	0.209355	0.0869462	-0.183721	-0.197288	-0.125395	0.0536102	-0.415695	0.0778535
BCS1_HUMAN	0.211349	-0.0335652	0.20902	0.116052	0.0125113	-0.261253	-0.110914	-0.00827091
BDH_HUMAN	0.612491	-0.355116	0.567607	0.295314	-0.0248456	-0.178967	-0.157724	0.0396849
BDH2_HUMAN	0.105203	-0.152066	0.108832	0.00512634	-0.0306978	-0.237463	0.0674808	0.0176081
BECN1_HUMAN	-0.0528385	-0.0323972	-0.0425839	0.0166083	0.0293594	-0.100275	-0.030705	-0.0666197
BGAL_HUMAN	0.143827	0.0205833	-0.0598624	0.292637	-0.229615	-0.0399238	-0.0745333	0.0822223
BGH3_HUMAN	-0.0396747	0.457191	-0.0608769	-0.192294	-0.0438442	0.13417	0.0315683	0.248453
BGLR_HUMAN	0.411243	-0.194391	0.133934	0.218722	-0.0503896	-0.152547	-0.356064	0.17795
BICD2_HUMAN	-0.0891614	-0.137834	-0.236684	0.134859	-0.194926	0.0442137	0.0593922	-0.0664024
BID_HUMAN	-0.0926412	0.21858	0.0561591	0.142194	-0.256359	-0.127152	-0.0282309	0.0889808
BIEA_HUMAN	0.0844434	-0.0644737	0.068683	0.158765	-0.0127579	-0.319838	-0.355113	0.0998687
BIG2_HUMAN	-0.0726683	0.171951	0.0598673	-0.0414808	-0.131745	0.0414808	-0.0429864	0.1508
BIN1_HUMAN	-0.0575358	-0.0531535	-0.00894168	-0.127493	0.156478	0.173579	0.104977	-0.0272368
BIN2_HUMAN	0.162511	-0.0626374	-0.0707439	1.55174	-0.196204	-0.0868047	-0.123178	0.101616
BIP_HUMAN	0.0142638	-0.0520725	-0.0629549	0.0370925	-0.00952428	0.146116	-0.0381556	-0.21552
BIRC2_HUMAN	-0.02685	-0.113532	-0.0125363	0.0766037	0.21622	-0.096365	0.0830561	0.352685
BIRC6_HUMAN	-0.171115	-0.0131307	-0.321584	-0.000167079	-0.0370265	-0.0178477	0.165394	0.138826
BL1S1_HUMAN	-0.259846	-0.0197146	-0.0209819	0.0181274	-0.2117	0.172577	0.155677	-0.0345856
BLMH_HUMAN	0.0415337	-0.140651	0.083329	0.0493777	-0.00499358	-0.197817	-0.0109541	0.00553836
BLVRB_HUMAN	0.0563658	-0.0400246	0.107703	0.170153	-0.114914	-0.243382	-0.109245	0.0231713
BMP2K_HUMAN	-0.0183594	0.1418	-0.102813	0.152929	-0.171703	-0.251592	-0.0192794	-0.0066613
BOLA1_HUMAN	0.235029	0.161822	-0.0748188	0.0183648	0.199236	-0.344246	-0.0765423	-0.0732758
BOLA2_HUMAN	-0.115241	0.00497195	0.0103916	0.207485	-0.129209	-0.233876	-0.162568	0.138098
BOLA3_HUMAN	0.643135	-0.0163303	0.381618	0.194418	-0.0614307	-0.29799	-0.350419	-0.20822
BOP1_HUMAN	-0.29706	-0.0583939	0.143302	-0.143588	-0.170091	0.0412574	0.0266733	0.0520818
BORC5_HUMAN	0.122335	-0.0631801	-0.259477	-0.212334	0.0323497	0.167739	-0.0120276	0.0120276
BORC6_HUMAN	0.581168	-0.0531479	0.213584	0.0243721	-0.0315356	-0.129248	-0.229828	-0.0875632
BORG4_HUMAN	0.154054	-0.101822	-0.119485	0.105029	0.0284408	0.219629	-0.186662	0.23476
BPHL_HUMAN	0.279011	-0.126954	0.325916	0.0107253	-0.427701	-0.255893	0.202278	-0.0772003
BPI_HUMAN	0.00744592	0.0528137	-0.101759	0.626961	-0.0991528	-0.123754	-0.029014	-0.0455981
BPL1_HUMAN	-0.0170392	0.0249884	-0.0512074	-0.0249884	-0.159424	-0.037989	0.150424	0.12273
BPNT1_HUMAN	0.167031	-0.134391	0.00020675	0.0867375	0.0189975	-0.260063	-0.0338554	0.0101251
BRAT1_HUMAN	0.126705	-0.206846	-0.170287	0.113236	0.0881585	-0.346518	-0.181259	0.319844
BRCA2_HUMAN	0.27243	0.0869416	-0.0890242	0.0294229	0.444814	-0.52453	-0.0294229	-0.0649351
BRCC3_HUMAN	0.129967	-0.0374076	-0.0435247	0.12103	-0.142574	-0.00606959	-0.00249059	0.0416002
BRD3_HUMAN	-0.00879074	0.0129066	0.00879074	-0.164041	-0.201437	0.0141009	-0.195002	-0.0863668
BRD4_HUMAN	-0.0544091	0.0129634	-0.203989	0.170244	-0.0129634	-0.0810894	-0.0829404	0.0436023
BRE1A_HUMAN	0.220025	0.0438906	-0.340658	-0.0313024	-0.0185188	0.0270272	0.0185188	0.114649
BRNP1_HUMAN	-0.143081	0.157334	-0.112689	-0.448687	0.456986	0.0981312	-0.0314128	-0.0567438
BROX_HUMAN	0.2557	-0.0899943	0.00414914	0.316866	-0.214172	-0.439678	0.0564038	0.00616003
BST1_HUMAN	0.0129623	0.121072	-0.286343	0.210624	-0.617923	-0.0129623	-0.153957	0.332048
BST2_HUMAN	0.0368698	0.0196064	-0.1117	0.0542496	0.0493478	-0.128089	-0.0204019	0.0572804
BT3A3_HUMAN	0.026216	0.390322	-0.0186393	-0.0345716	-0.251828	-0.183808	0.052032	0.608467
BT3L4_HUMAN	-0.199226	-0.0980446	-0.0465679	-0.130047	0.214785	0.105198	0.142403	-0.0120697
BTBD1_HUMAN	0.216941	-0.0467441	0.125452	0.00594222	-0.324979	-0.0450101	-0.10987	-0.185088
BTD_HUMAN	-0.0796429	0.220837	-0.135603	0.156256	0.239516	0.00376168	-0.00376168	0.296029
BTF3_HUMAN	0.00515873	-0.043905	0.000352041	-0.00337444	-0.00218167	-0.0044153	-0.000755205	-0.01425
BUB3_HUMAN	-0.0512636	0.128007	-0.0182689	0.0652353	0.0360781	-0.0581084	0.0483754	-0.0509436
BUD23_HUMAN	0.206802	-0.119532	0.696756	0.422657	-0.120452	-0.0135991	-0.177648	0.0135991
BUD31_HUMAN	0.138506	-0.0419778	-0.297708	0.00214934	0.206434	0.0303299	0.0705814	0.032973
BYST_HUMAN	0.320919	0.127385	-0.372685	0.323305	-0.189868	0.0983647	-0.43819	-0.274299
BZW1_HUMAN	0.0466568	0.00539398	-0.00539398	-0.103318	-0.0319758	0.0234038	0.0519575	0.128886
BZW2_HUMAN	-0.000573346	-0.0852649	0.0185809	-0.0776284	0.0712677	0.0796978	-0.0193527	-0.0419285
C163A_HUMAN	0.00904245	0.469249	-0.28767	-0.0953816	-0.0713503	0.0163299	0.409297	0.305311
C19L1_HUMAN	0.044208	-0.044208	0.316626	0.42707	-1.44296	-0.409108	-0.359101	0.0742857
C1QA_HUMAN	0.0116968	0.52412	-0.021441	-0.0370321	-0.0671306	-0.0339487	0.043221	0.622079
C1QB_HUMAN	0.099925	0.563846	-0.0388593	0.142758	-0.340593	-0.050973	-0.0202927	0.595688
C1QBP_HUMAN	0.0591163	-0.0415707	0.0158884	0.0468826	0.0188645	-0.0579766	-0.0139855	-0.137249
C1QC_HUMAN	0.135472	0.730977	-0.0810334	0.0810334	-0.55615	0.114278	-0.20982	1.08722
C1QR1_HUMAN	0.150769	-0.0779231	-0.117056	0.129816	-0.0279865	-0.0597829	-0.183072	0.0597829
C1R_HUMAN	0.28286	0.666002	-0.0703669	-0.0344579	-0.041267	0.0148792	-0.0280272	0.526365
C1RL_HUMAN	-0.116597	0.421913	-0.369979	-0.384123	-0.0171695	-0.374873	0.824002	0.254459
C1S_HUMAN	0.134408	0.556091	-0.0830582	0.000583036	-0.0271293	-0.0472558	-0.025646	0.547737
C1TC_HUMAN	0.0255262	-0.113374	0.129306	0.0154665	-0.0490434	0.0236014	-0.0298879	-0.00587787
C2C2L_HUMAN	0.0122444	-0.0599802	-0.0488817	0.547889	-0.295572	0.159032	-0.144741	-0.0149862
C2CD2_HUMAN	0.232819	0.0248041	0.0272358	-0.0311592	-0.611547	-0.0485116	-0.0248041	0.047145
C2CD5_HUMAN	0.209819	0.0403647	-0.210694	-0.267188	-0.0202084	-0.0324896	-0.0330476	0.224862
C2D1A_HUMAN	0.00187699	-0.0167503	-0.0462358	-0.0346606	0.0232923	0.0504054	-0.000494887	0.17517
C2D1B_HUMAN	0.101713	-0.116575	-0.03237	0.0240924	0.00414098	0.00288137	0.016739	-0.120363
C43BP_HUMAN	0.0285086	-0.0176992	-0.103292	0.0451876	-0.14194	-0.0224578	-0.0722504	0.326308
C4BPA_HUMAN	0.24633	0.638063	-0.190186	0.0640158	-0.0640158	-0.0650784	0.00486701	0.525671
C4BPB_HUMAN	-0.00148872	0.260976	-0.180618	-0.0322468	0.0530545	0.00112897	-0.0346095	0.279883
C560_HUMAN	0.178302	-0.0577155	0.689337	0.408149	-0.745257	-0.181071	-0.0912774	-0.479385
C56D2_HUMAN	-0.225203	0.127121	-0.473289	-0.274143	0.692529	0.384046	-0.400259	-0.835354
C99L2_HUMAN	-0.0667922	-0.035248	-0.0124272	0.236051	0.0498339	-0.146432	-0.0133425	0.0124272
CA050_HUMAN	0.129839	-0.0499662	0.0879576	0.12343	-0.0848139	-0.038533	-0.252681	0.0844143
CA109_HUMAN	-0.32741	0.274653	0.0607483	-0.0607483	-0.386689	0.245067	-0.595786	0.459427
CA123_HUMAN	-0.00510716	0.033767	-0.0154932	-0.0170674	0.181355	-0.0303979	0.0260561	-0.0057099
CA174_HUMAN	0.351353	0.254578	0.0310966	-0.285685	-1.1529	-0.181534	-0.34384	0.296983
CA198_HUMAN	0.102304	0.0337138	-0.212267	-0.0272007	-0.265869	0.0549365	-0.00980898	0.240039
CA2D1_HUMAN	-0.10125	-0.0546326	-0.040042	-0.187635	0.109325	0.188779	0.142378	-0.00877404
CA2D3_HUMAN	-0.567069	0.0334686	-0.0449574	-0.0685753	0.470745	0.120306	-0.0188322	-0.11089
CAB39_HUMAN	-0.0152673	0.0954519	-0.0297784	0.000730676	0.118111	-0.0612034	0.0203285	-0.000604161
CAC1S_HUMAN	-0.0310843	-0.00580083	-0.0464051	-0.1657	0.0467571	0.0490023	0.0706506	0.00969148
CACB1_HUMAN	-0.0447552	-0.0248665	-0.0361625	-0.1269	0.0164825	0.153182	0.0510819	0.00162193
CACL1_HUMAN	-1.23286	-0.422335	0.264698	0.0529943	0.397974	-0.421675	-0.61165	-0.0492015
CACO1_HUMAN	0.350285	-0.109331	0.0617287	0.134255	0.0757286	-0.102146	-0.175962	-0.136191
CACO2_HUMAN	0.0840757	-0.144542	-0.000312917	0.117554	-0.0295696	-0.414934	-0.168865	-0.109217
CACP_HUMAN	0.25215	-0.164887	0.257373	0.0336872	-0.101229	-0.0964792	0.0744727	-0.00626802
CAD13_HUMAN	0.0797522	-0.00868461	-0.0314935	-0.164381	-0.0248368	-0.0257344	0.0496272	0.00175427
CAD15_HUMAN	-0.0537253	-0.146592	-0.00107065	-0.106354	0.256921	0.159793	-0.0103759	0.211041
CADH5_HUMAN	0.00846755	-0.207845	0.0735158	-0.00846755	-0.0987181	0.101785	-0.0819784	-0.04343
CADH6_HUMAN	-0.347069	0.363872	-0.0731171	0.00407634	-1.54919	-0.208593	0.165917	0.395645
CAF17_HUMAN	0.0933104	-0.00856928	0.0979941	-0.0403433	-0.0535491	-0.197862	-0.00138779	0.0195417
CAH1_HUMAN	0.0611402	-0.0694837	0.283857	0.160763	-0.158589	-0.326984	-0.221016	0.0930605
CAH13_HUMAN	0.223663	0.132522	-0.240205	0.547728	-0.205194	-0.100568	0.0283565	0.170914
CAH14_HUMAN	0.1817	0.654375	0.196234	-0.778507	0.344966	0.240966	-0.710483	-1.58691
CAH2_HUMAN	0.0437054	-0.0737706	0.159371	0.171648	-0.112837	-0.4263	-0.167098	0.14473
CAH3_HUMAN	-0.000968532	-0.047364	-0.295767	-0.0721101	0.241786	-0.00808337	0.335002	0.145028
CAH4_HUMAN	0.427114	-0.0810535	0.371874	-0.150589	0.147831	-0.195315	-0.121942	-0.236428
CAH8_HUMAN	-0.449526	-0.0673331	-0.0281893	-0.420393	0.0542977	-0.563067	0.0281893	0.266774
CAHM5_HUMAN	0.320672	-0.243949	-0.23478	0.121898	-0.160851	0.0445919	-0.303434	0.0973828
CALD1_HUMAN	0.307926	0.312249	-0.401747	0.175261	-0.327849	0.171813	-0.234096	0.650921
CALM2_HUMAN	0.0113707	0.135091	-0.0777981	0.165324	-0.0111049	-0.0236476	0.0413366	-0.162328
CALR_HUMAN	0.0652268	-0.00893597	-0.132721	0.00455301	0.0406177	-0.00406516	-0.0732839	0.087525
CALU_HUMAN	0.0507019	-0.04327	-0.176614	-0.0262526	0.0018282	0.104248	0.131989	-0.0675698
CALX_HUMAN	0.00866225	-0.0339476	-0.0521747	0.0891144	-0.00479841	0.0944431	-0.0709944	0.00160276
CAMLG_HUMAN	-0.0827996	-0.0305858	-0.0880924	0.0725038	0.0264013	0.247012	0.0366468	-0.108121
CAMP_HUMAN	0.230636	0.0530744	-0.54982	1.56209	-0.75105	-0.102727	-0.0530744	0.322384
CAMP1_HUMAN	-0.298821	0.02899	-0.0697887	0.29615	0.239488	-0.02899	-0.316897	-0.195451
CAN1_HUMAN	0.040936	0.00914842	-0.0217596	0.149273	-0.0108355	-0.181733	-0.033441	0.0340265
CAN2_HUMAN	0.121437	-0.0408208	-0.0165109	-0.014096	0.0407435	-0.0608857	0.000995106	0.123815
CAN3_HUMAN	0.0181463	-0.0106387	-0.0518145	-0.297669	0.0966081	0.197732	-0.02398	-0.000788993
CAN5_HUMAN	0.0387285	0.283854	-0.053811	0.131708	-0.307861	-0.197854	-0.438479	0.0535851
CAN7_HUMAN	0.0514165	-0.124577	0.00872343	0.165268	0.0486862	-0.0581299	0.0560707	-0.148749
CANB1_HUMAN	-0.118326	0.012892	0.0344442	0.0717199	-0.10852	-0.0508639	0.0318094	-0.163388
CAND1_HUMAN	0.0708092	0.0101136	0.037356	0.162892	-0.0513062	-0.212119	-0.153331	0.0191736
CAND2_HUMAN	-0.00318571	0.00519543	-0.00472947	-0.00476931	0.0498247	-0.118137	-0.0558671	0.00250449
CAP1_HUMAN	0.106324	0.0321807	-0.0765192	0.437493	-0.275285	-0.0920357	-0.182609	0.157352
CAP2_HUMAN	-0.0202483	-0.0108602	-0.0674104	-0.0368373	0.162984	0.0584525	0.0232381	0.0220862
CAP7_HUMAN	0.0859198	0.102466	-0.0970159	0.261699	-0.331678	-0.0932357	-0.0621569	0.0251505
CAPG_HUMAN	-0.00657449	0.250511	-0.161577	0.101325	0.133623	-0.148413	-0.0555303	-0.122519
CAPR1_HUMAN	0.0184552	-0.0903141	-0.0368652	-0.102402	0.120522	0.0334335	0.0827626	-0.00808318
CAPZB_HUMAN	0.0138483	-0.0273321	-0.0711307	-0.0923597	0.0238768	0.0990759	-0.00456547	0.0424921
CAR19_HUMAN	-0.151083	-0.020094	0.282453	-0.0542439	0.020094	0.114189	-0.0695137	-0.179532
CARD8_HUMAN	0.0982553	0.00936216	0.0250171	-0.164978	0.17713	0.028029	-0.148864	0.0553897
CARM1_HUMAN	0.0423761	-0.0398814	-0.0981121	0.0183821	0.0210914	-0.0192822	-0.0223614	0.0836399
CASC3_HUMAN	0.0186133	-0.297718	-0.124397	0.0488988	-0.292782	0.37536	-0.0186133	-0.365879
CASP3_HUMAN	-0.1112	0.129537	-0.104483	0.311585	0.157233	-0.0376844	0.0376844	-0.471494
CASP7_HUMAN	0.00525859	-0.0521448	-0.135716	-0.0911197	0.289839	0.000262911	0.206942	0.106116
CASP8_HUMAN	-0.0922334	0.269301	-0.095377	-0.116235	0.361758	-0.337907	-0.258889	0.0922334
CASPE_HUMAN	-0.0367571	-0.435547	0.527489	0.143376	-0.197293	0.668813	0.78278	-0.645671
CASQ1_HUMAN	-0.127422	0.0134106	-0.0578436	-0.160714	0.146104	0.0813201	0.157012	-0.0481295
CASQ2_HUMAN	0.492423	-0.332818	0.117245	0.171799	-0.132283	0.00890955	-0.367504	0.011205
CAST2_HUMAN	-0.0222936	0.0179432	-0.0467744	0.0301297	-0.25246	-0.279454	-0.0187717	0.0511815
CASZ1_HUMAN	0.102286	-0.605398	0.0255342	-0.0255342	0.203659	0.425453	-0.265492	-0.359437
CATA_HUMAN	0.0654547	-0.0442949	0.234681	0.233113	-0.212115	-0.293706	-0.202497	0.0969175
CATB_HUMAN	0.29765	-0.20627	0.161768	0.0961397	0.0288877	-0.234988	0.042604	-0.173709
CATC_HUMAN	0.0255595	0.00466175	-0.0370593	0.133153	-0.0206427	-0.162328	-0.163272	-0.0255595
CATD_HUMAN	0.291585	-0.0480753	0.105546	0.0520787	0.0554714	-0.158821	0.102877	-0.155385
CATG_HUMAN	0.124054	-0.0165209	-0.127034	0.537507	-0.173267	-0.127546	-0.0544838	0.119739
CATH_HUMAN	0.132011	-0.234802	-0.270988	0.193832	0.193637	0.0346145	0.213048	0.0990995
CATL1_HUMAN	-0.408939	-0.193875	-0.0426616	0.0426616	0.246185	0.0476968	0.204139	-0.103541
CATZ_HUMAN	0.131511	0.067828	-0.225694	0.0409911	-0.00592028	-0.246196	0.0701706	-0.443196
CAV1_HUMAN	0.466153	0.187481	-0.191928	-0.112125	-0.00886546	0.20358	-0.121147	0.316566
CAV2_HUMAN	-0.00588693	0.136827	-0.0765052	-0.327927	-0.277071	0.0554089	-0.0725358	0.251233
CAV3_HUMAN	0.043322	-0.0399087	-0.238597	-0.444337	0.251587	-0.056624	0.306478	-0.0423449
CAVN1_HUMAN	0.101987	0.111244	-0.0684692	-0.148597	-0.0192724	0.123083	-0.120548	0.0693819
CAVN2_HUMAN	0.285856	0.00413076	0.00213893	0.287829	-0.294926	-0.0166875	-0.231369	-0.00573697
CAVN3_HUMAN	0.142955	0.33077	-0.370535	0.0240087	-0.17224	0.576329	-0.116332	0.744125
CAVN4_HUMAN	0.0069489	-0.0876625	0.00861394	-0.271034	0.284278	0.0353834	0.0700276	-0.0733198
CAZA1_HUMAN	0.0258635	0.0283605	-0.0859659	0.0423425	0.00804125	-0.0277714	-0.0818412	0.0209267
CAZA2_HUMAN	-0.00276383	-0.0267524	-0.0746761	-0.0796176	0.11443	0.104836	0.0146653	0.0458186
CB068_HUMAN	0.0498569	0.1173	-0.0270861	-0.284071	-0.191817	0.0696662	-0.123487	0.167234
CB069_HUMAN	0.0746318	-0.153952	-0.104249	0.104249	-0.164095	0.0573838	-0.0573838	0.0607781
CB39L_HUMAN	-0.177822	0.796484	0.00473603	-0.187252	0.530351	-0.351124	0.482926	0.503981
CBG_HUMAN	0.365466	0.389553	-0.0543236	0.0816072	-0.0590462	-0.135477	-0.0511659	0.893459
CBL_HUMAN	0.0543741	-0.00827579	-0.13827	0.110853	-0.0990609	-0.249145	-0.0469449	0.0660564
CBPA3_HUMAN	-0.144668	-0.506827	-0.759238	0.270951	0.441499	0.627948	-0.0896958	0.88502
CBPB2_HUMAN	0.785452	0.646197	-0.381712	0.50644	-0.425719	-0.0744936	0.0181139	1.01797
CBPC4_HUMAN	0.0925756	0.0846915	0.532492	0.321359	-0.110516	-0.466509	-0.0971504	-0.0846915
CBPM_HUMAN	0.252544	-1.17196	0.325016	0.0558413	-0.378193	-0.0558413	-0.691427	-0.83665
CBPN_HUMAN	0.173947	0.084563	-0.180795	0.18519	-0.158652	-0.203979	-0.0894602	0.4618
CBPQ_HUMAN	0.281405	0.00546713	-0.255893	-0.0836534	-0.243021	-0.0553107	-0.00546713	0.273527
CBR1_HUMAN	0.189801	-0.105626	0.224457	0.220889	-0.337472	-0.176563	-0.153294	0.105626
CBR4_HUMAN	0.22276	-0.130967	0.165203	0.145972	-0.0726501	-0.127443	-0.0183295	-0.252662
CBX1_HUMAN	0.148909	-0.173574	0.0206337	-0.150653	0.151058	0.136983	-0.0380311	-0.137794
CBX3_HUMAN	-0.098768	0.0233255	-0.0980118	-0.0183335	0.0391719	0.120093	0.0382814	0.245459
CBX5_HUMAN	0.286614	0.130573	-0.179696	0.405549	-0.183128	9.77e-05	-0.23875	-9.77e-05
CC124_HUMAN	0.0535867	0.0322704	-0.0808977	-0.23027	-0.0160448	0.00506075	0.125477	0.0143905
CC127_HUMAN	0.523964	0.0612633	0.106588	0.0569305	0.405751	-0.43164	0.107739	-0.156566
CC134_HUMAN	-0.309821	0.652996	-0.0788749	-0.135329	0.0508422	0.34383	1.42171	0.0329956
CC141_HUMAN	0.658089	0.540466	-0.663015	0.206067	-0.144759	0.563931	-0.285646	-0.309208
CC194_HUMAN	-0.0505404	0.0901299	0.0190005	-0.0772634	0.207191	-0.279304	0.547843	0.156852
CC50A_HUMAN	-0.00714235	0.114853	-0.31576	0.117268	-0.0614006	-0.153094	0.014408	0.0375954
CCAR1_HUMAN	-0.145042	0.113011	-0.0431851	-0.0743866	-0.0308159	-0.00371392	0.0550836	0.312258
CCAR2_HUMAN	0.123725	-0.0101326	0.0101326	0.0221787	-0.104407	-0.0196775	-0.0884683	0.0693633
CCD12_HUMAN	-0.218253	-0.129039	-0.033751	-0.372839	0.296185	0.515616	0.539953	0.033751
CCD22_HUMAN	0.0667132	-0.0309856	0.00183107	0.104079	0.0223864	-0.0665064	-0.121182	0.0782253
CCD25_HUMAN	-0.526832	-0.608879	-0.0646806	0.308315	-0.621995	-0.672051	0.20831	0.0646806
CCD43_HUMAN	0.233671	0.0460969	0.0103929	-0.15006	0.356675	0.182304	0.0356106	-0.152101
CCD47_HUMAN	-0.0438204	0.0399585	-0.0591084	0.0109546	0.0393285	-0.00988563	-0.0063018	0.0209445
CCD50_HUMAN	0.184098	-0.34303	0.166358	0.300708	-0.0900099	-0.0958218	0.0222492	0.334915
CCD51_HUMAN	0.235912	-0.045033	0.332079	0.179907	-0.26782	-0.346314	-0.102919	-0.0757826
CCD58_HUMAN	0.348176	-0.151701	-0.00115897	0.149722	-0.0690196	-0.161265	-0.0341223	0.000958255
CCD80_HUMAN	0.12218	0.390578	-0.340931	0.35785	-0.413575	1.32078	-0.922489	0.837237
CCD91_HUMAN	0.515389	-0.337986	0.03616	0.104511	-0.0902428	0.126201	-0.0642601	0.284355
CCD93_HUMAN	0.057605	0.0443516	-0.0661626	0.0751445	0.0458705	-0.0664263	0.00112407	-0.171332
CCD97_HUMAN	-0.204242	0.069135	0.073795	0.177385	-1.07447	-0.196957	-0.069135	0.272299
CCD9B_HUMAN	0.141944	0.28667	-0.0514908	-0.248347	0.0764571	-0.223136	-0.0933658	0.0186489
CCDB1_HUMAN	0.0749128	0.144074	0.352344	-0.0749128	-0.712701	0.106363	-0.00541405	-0.130464
CCDC6_HUMAN	0.146964	0.00161873	0.0669451	0.00174659	0.0044577	-0.0567956	-0.0244064	-0.00174659
CCG1_HUMAN	-0.0327159	-0.00852839	-0.049202	-0.161823	0.0811526	0.0671804	0.224455	0.0149235
CCHL_HUMAN	0.0384694	-0.00141789	0.182887	-0.0801656	0.16598	-0.00197989	-0.0306387	-0.367268
CCL18_HUMAN	0.47948	1.29214	-0.659809	-0.207543	-0.0117865	0.0117865	-0.054625	0.0588857
CCNY_HUMAN	0.17283	0.152124	-0.0122554	0.20313	-0.0863307	-0.0347895	-0.279873	-0.0165907
CCPG1_HUMAN	0.216068	-0.16953	-0.031576	0.0949566	-0.0397863	0.204309	-0.251796	0.191596
CCS_HUMAN	0.0414694	0.079722	0.220703	0.0152293	0.0264886	-0.378615	-0.130875	-0.0169043
CCYL1_HUMAN	-0.327088	-0.110251	-0.0946536	-0.0364653	0.0885915	0.0631902	0.185651	-0.00361585
CCZ1_HUMAN	0.288455	-0.189547	-0.126085	0.0910417	0.250625	-0.00655558	0.0326651	0.109068
CD054_HUMAN	-0.0606159	-0.278335	0.0758981	-0.163707	0.142727	0.0653183	0.088025	-0.184944
CD109_HUMAN	0.0972452	-0.0324706	-0.129475	0.140836	-0.0297599	0.101728	-0.0310114	0.264279
CD11B_HUMAN	-0.0832629	-0.314412	-0.0316966	-0.00127238	-0.0913655	0.0877494	0.1535	0.0410424
CD14_HUMAN	0.134782	0.311114	-0.172655	0.0018626	-0.181461	-0.0627689	-0.0321439	0.359713
CD151_HUMAN	-0.0231285	-0.010633	0.183108	0.010633	0.0438528	-0.0343194	0.0956233	0.0502672
CD226_HUMAN	0.39649	-0.117847	0.328057	1.34142	-0.530266	-0.438061	-0.798006	0.117847
CD2AP_HUMAN	0.00638696	0.0248858	0.00632838	0.0243869	0.123472	-0.106265	-0.0559243	-0.017276
CD2B2_HUMAN	-0.104555	-0.366999	-0.316165	0.162136	-0.020123	0.106667	-0.0678377	0.0841669
CD34_HUMAN	0.12712	0.0334336	-0.0334336	-0.0836142	-0.0407657	-0.015423	-0.187147	0.113057
CD36_HUMAN	0.30037	-0.147604	0.182391	-0.0708816	0.00321506	0.0582928	-0.392603	-0.383914
CD37L_HUMAN	0.119758	-0.127889	-0.0946772	0.069499	0.0126217	-0.0248325	0.0334464	-0.0487659
CD38_HUMAN	-0.114092	0.294364	-0.198046	-0.129722	0.211972	-0.0731842	-0.460537	-0.0944702
CD44_HUMAN	-0.0955654	0.221823	-0.213804	0.319035	-0.282966	0.120962	-0.113163	0.250666
CD47_HUMAN	0.105611	0.263488	0.0259033	0.700287	-0.157455	-0.0438302	-0.375303	-0.0259033
CD59_HUMAN	-0.0956554	-0.175318	-0.264445	0.0421373	0.27986	0.108722	-0.0636648	0.145025
CD5L_HUMAN	-0.230493	0.165032	-0.226506	0.45331	-0.0322297	-0.0864403	0.0670526	1.92357
CD81_HUMAN	0.0276537	0.25467	-0.213403	-0.0791535	-0.123357	0.202199	-0.00807577	0.160337
CD9_HUMAN	0.0934612	0.0707112	-0.653246	0.696447	-0.677614	-0.0730009	-0.430005	0.325907
CD97_HUMAN	0.0800669	-0.03013	-0.071456	0.153168	0.0420123	-0.160348	-0.0937789	0.366498
CDC16_HUMAN	0.204575	-0.0804902	-0.0801115	0.179796	-0.14588	-0.114202	-0.0801239	0.0801115
CDC37_HUMAN	0.1731	0.0141168	0.0382072	-0.0245085	0.0505783	-0.00698415	-0.194189	0.0162513
CDC42_HUMAN	0.0303343	-0.071285	-0.0343419	0.0178251	0.00382247	-0.0644608	0.172678	-0.0735595
CDC5L_HUMAN	-0.0220795	0.0374037	-0.0311267	-0.0886739	0.163278	0.0301868	0.0401313	-0.00610894
CDD_HUMAN	-0.0613465	-0.0689569	-0.312077	0.224527	-0.519998	0.0653709	0.327595	0.0613465
CDIPT_HUMAN	0.0546029	0.120974	-0.108839	0.211243	-0.0953378	-0.0269961	0.00342142	-0.00342142
CDK16_HUMAN	-0.021202	-0.196863	0.00204718	-0.0586843	0.0881795	0.0117537	0.0793255	0.00121031
CDK4_HUMAN	-0.251343	0.14463	0.0231029	-0.0149809	0.0827115	-0.0757953	-0.0231029	0.010629
CDK5_HUMAN	0.0454609	0.0169389	-0.00642023	0.0967701	0.141785	-0.0826695	-0.0776157	0.0142353
CDK6_HUMAN	0.307492	0.0225979	-0.0831123	-0.0996625	0.0709361	-0.555467	-0.436631	-0.0225979
CDK9_HUMAN	0.0437788	-0.189046	0.163463	0.235449	-0.0437788	-0.118242	-0.0992234	0.139045
CDKAL_HUMAN	0.092623	0.00399891	-0.00576787	-0.18095	-0.10111	0.167894	-0.101659	0.0572247
CDN1B_HUMAN	-0.00197142	0.319557	-0.0199832	-0.40295	-0.327889	0.0521695	0.0605632	0.159249
CDN1C_HUMAN	0.233902	-0.0716592	0.00130838	0.0491311	0.0171141	-0.284097	-0.196507	0.363214
CDNF_HUMAN	-0.0195499	-0.111713	-0.00643572	-0.238484	0.0207172	0.0148935	0.0603151	0.0436587
CDS2_HUMAN	-0.225031	0.150257	-0.145782	0.00920322	0.0765966	-0.0591725	0.113524	0.0954343
CDSN_HUMAN	0.157336	0.253188	0.262516	0.126019	0.24787	-0.112823	-0.206815	0.244675
CDV3_HUMAN	-0.0189571	-0.151664	-0.0183218	-0.0356022	0.130457	0.0593457	0.0673405	0.0254058
CE051_HUMAN	0.0821365	-0.521538	-0.0754556	0.25144	-0.146864	-0.247441	-0.134069	0.252129
CE170_HUMAN	0.148115	-0.0188606	-0.0728903	0.0624344	0.205699	0.0246997	-0.00931379	-0.128061
CEAM1_HUMAN	0.82943	0.365168	1.06768	0.960255	-0.750352	-0.665374	-0.989232	-0.365168
CEAM6_HUMAN	-0.289205	0.219181	-0.0243522	-0.0283917	-0.150789	-0.061705	0.118106	0.157809
CEAM8_HUMAN	-0.29756	-0.162823	0.0504127	0.294013	-0.119846	0.00256863	-0.00256863	0.106413
CEBOS_HUMAN	0.253735	-0.170311	0.179152	0.125079	0.115614	-0.333858	-0.127639	-0.00748059
CEBPZ_HUMAN	-0.0368284	0.0402763	0.0299409	0.0211055	0.202413	-0.0463832	-0.103044	-0.146747
CELF1_HUMAN	-0.0568317	-0.151263	-0.0315238	-0.20018	-0.030208	-0.0212241	-0.0598344	0.189776
CELF2_HUMAN	-0.346517	-0.291606	0.220207	-0.187119	0.361591	-0.309967	0.0105058	-0.0309459
CENPV_HUMAN	0.0568581	-0.107616	-0.0684706	-0.331852	-0.0884008	0.391369	-0.00080542	0.154591
CEP68_HUMAN	-0.19501	0.00780625	-0.0372576	0.0453339	-0.032919	-0.00780625	0.0842086	0.0980139
CEP85_HUMAN	-0.0591674	-0.0607435	-0.179612	-0.0947111	-0.105679	0.159558	-0.0596644	-0.0605199
CEPT1_HUMAN	-0.501978	0.381172	-0.253479	0.0437505	-0.171671	-0.176306	-0.00110074	0.239551
CERU_HUMAN	0.269737	0.377033	-0.233964	-0.0531918	0.0218585	-0.0502569	0.0503884	0.847062
CETP_HUMAN	-0.00479286	0.854032	-0.415294	0.102343	-0.57415	0.00479286	0.131427	0.586054
CF047_HUMAN	0.366021	-0.16712	0.0818035	0.101641	0.162161	-0.226321	-0.406913	-0.17232
CF089_HUMAN	-0.0778726	-0.222996	-0.0987456	0.0746549	-0.0116344	-0.438536	0.0192772	0.0116344
CF120_HUMAN	-0.214084	-0.0547359	0.0181278	-0.318961	0.496997	0.199795	-0.0592417	-0.0858494
CF203_HUMAN	0.424386	0.0167644	0.30143	0.446749	-0.0574311	0.0884461	-0.0874821	-0.0167644
CFAB_HUMAN	0.344139	0.443915	-0.0349397	0.0301549	-0.20796	-0.0441314	-0.0121795	0.83246
CFAD_HUMAN	-0.0574872	0.194136	-0.00895078	-0.261486	0.0574872	0.0969916	0.062242	0.0155068
CFAH_HUMAN	0.141238	0.531326	-0.19933	-0.0606554	-0.00243772	-0.0551477	0.129786	0.641129
CFAI_HUMAN	0.214975	0.372324	-0.126513	-0.0428527	-0.00871585	-0.0977153	0.0165395	0.780001
CG025_HUMAN	-0.272919	0.154974	0.106201	0.224336	-0.336224	-0.154938	-0.156253	-0.126894
CG050_HUMAN	-0.00627862	0.00627862	-0.493664	0.0496731	0.0525629	0.237145	0.280089	-0.23165
CGAT2_HUMAN	-0.207552	0.0513897	0.307046	-0.0513897	-0.0800467	-0.0595514	0.06542	0.0550102
CGBP1_HUMAN	-0.0272069	0.0895745	-0.0346332	-0.104205	-0.0668403	0.036696	0.376373	0.251635
CGL_HUMAN	0.500681	-0.31839	-0.348472	-0.125854	1.78706	0.125854	0.898294	-0.352719
CH082_HUMAN	0.512551	-0.243019	0.538149	0.257382	-0.0771891	0.00715014	-0.0906262	-0.105326
CH10_HUMAN	0.0736216	-0.121546	0.333394	-0.008676	-0.0314267	-0.0478247	-0.0965873	-0.0855516
CH3L1_HUMAN	-0.0836525	0.0831525	0.013078	-0.159336	0.199177	-0.013078	-0.12996	0.404682
CH60_HUMAN	0.0892733	-0.0421056	0.224434	0.0324471	-0.078928	-0.0988476	-0.0374801	-0.0525962
CHAP1_HUMAN	-0.320365	0.29669	-0.0708413	-0.264321	0.0870543	-0.126606	-0.146522	0.146397
CHC10_HUMAN	0.0846631	0.0151691	0.181434	0.114147	0.0639516	-0.202166	-0.124363	-0.174718
CHCH1_HUMAN	0.227951	0.0198902	0.33774	0.0604557	-0.174909	-0.257909	-0.175324	-0.228884
CHCH2_HUMAN	-0.0297773	-0.0242955	0.139513	-0.0609234	-0.0653136	0.0392311	0.0849151	-0.297217
CHCH5_HUMAN	-0.0909311	-0.12498	-0.0735319	-0.0933101	-0.0247054	0.0593335	0.178438	0.103483
CHCH7_HUMAN	-0.0977909	0.00241743	-0.223196	0.0296161	0.0118485	-0.103857	-0.00241743	0.072952
CHD4_HUMAN	0.00974681	0.0118635	-0.149202	-0.137067	-0.00800583	0.0568046	0.127779	-0.109621
CHDH_HUMAN	-0.00666636	0.0820184	-0.00534063	-0.216339	0.0306408	-0.0543823	-0.123786	0.110673
CHERP_HUMAN	0.156465	-0.150326	-0.0690001	-0.0729888	-0.052864	0.0731238	-0.0802219	0.11446
CHID1_HUMAN	0.222043	-0.0498554	0.116351	-0.0097709	-0.10009	0.576059	-0.131773	-0.198262
CHIP_HUMAN	-0.0681176	-0.000654888	-0.0757761	-0.019793	0.0159105	0.109902	-0.112108	0.0268198
CHLE_HUMAN	0.223564	0.309223	-0.255896	-0.0270659	0.0382563	-0.2593	-0.0614481	0.547677
CHM2A_HUMAN	0.085606	0.00133381	0.00135578	-0.0428197	0.0306143	0.0782927	-0.0935822	-0.0355218
CHM4A_HUMAN	0.0367691	0.135409	-0.124467	0.132741	-0.107978	-0.242707	-0.404582	0.0812772
CHM4B_HUMAN	0.16639	0.0665145	-0.00987955	-0.057984	0.0344979	-0.0502508	0.00924991	0.013384
CHMP3_HUMAN	0.0935632	-0.0820258	0.0876765	-0.00624423	0.00624423	-0.252265	-0.14224	0.235667
CHMP5_HUMAN	-0.0839441	0.0276463	0.00537887	0.0289266	0.0752658	-0.288206	0.0495338	0.0721952
CHMP6_HUMAN	0.0950372	0.115994	0.0295171	-0.0582198	9.02e-05	-0.107277	-0.0854376	-0.0167632
CHMP7_HUMAN	-0.00337248	0.0306492	-0.0400019	0.0637343	-0.188061	-0.0231857	0.0860693	-0.0346487
CHP1_HUMAN	0.0841903	-0.175243	0.0121765	-0.0178942	0.0090701	0.0694462	-0.117592	-0.0405343
CHRD1_HUMAN	-0.00629775	-0.109693	0.177722	-0.0158348	-0.00266934	-0.0304001	-0.0249147	0.113794
CHSP1_HUMAN	0.0326454	0.0301384	0.283293	-0.0592559	-0.122457	-0.414518	-0.324906	0.0926457
CHTOP_HUMAN	-0.015465	-0.0176306	-0.132107	-0.215553	0.0599579	0.095204	0.160082	0.0281865
CIA30_HUMAN	0.229432	-0.0630776	0.202	0.0630776	-0.13497	-0.715169	-0.410705	-0.385728
CIAO1_HUMAN	0.0551257	-0.0756827	0.0110113	0.144593	-0.254579	-0.137175	-0.0823356	0.139425
CIC_HUMAN	0.214448	-0.215365	-0.0652868	-0.156832	-0.0979895	-0.196434	0.182511	0.522278
CILP1_HUMAN	0.00591598	0.77579	-0.187984	-0.0639053	-0.0549014	-0.0284517	0.330729	0.23263
CIP4_HUMAN	-0.00822942	0.00751487	-0.038433	-0.0464711	0.0589933	0.0374319	0.0822973	-0.0370627
CIRBP_HUMAN	0.0550545	-0.273352	-0.0907096	0.00402844	0.0945641	0.267574	0.00134561	-0.0609734
CISD1_HUMAN	0.1128	-0.0822401	0.17436	0.0277396	-0.0548659	-0.174848	0.0143422	-0.186046
CISD2_HUMAN	-0.0581021	-0.0263471	-0.0548642	0.0426017	-0.244531	-0.103913	-0.0561928	0.0492049
CISY_HUMAN	0.240008	-0.0524809	0.151253	0.0665353	-0.0276193	-0.224199	-0.0173525	-0.133454
CJ071_HUMAN	-0.148262	-0.0226421	-0.0538934	-0.134802	0.0216475	0.108227	0.0733828	0.167593
CJ076_HUMAN	0.0595981	-0.0595981	-0.110221	0.223481	-0.368678	-0.25773	-0.308192	0.134467
CK054_HUMAN	0.15657	-0.0966723	-0.079285	0.175073	0.0616149	-0.166973	-0.0249076	0.0730567
CK068_HUMAN	0.209813	-0.123285	-0.0558592	0.129669	0.161854	-0.0849484	-0.0149376	-0.0434133
CK5P2_HUMAN	-0.120242	0.0367824	0.0627175	-0.0964446	0.288517	0.447353	0.0529707	-0.0367824
CK5P3_HUMAN	0.178299	-0.0658233	-0.0691456	0.177783	-0.181028	-0.0250677	-0.14513	-0.0090757
CKAP4_HUMAN	0.0945672	0.103637	-0.134761	0.0268404	-0.0296841	0.0413098	-0.0469612	0.00811555
CKAP5_HUMAN	0.0386317	-0.0367565	0.0152054	0.0795154	-0.113719	0.0279917	-0.0366327	-0.0594876
CKLF5_HUMAN	0.0985752	-0.0985752	0.304909	0.886559	-0.430686	-0.582168	-0.301381	0.155091
CKP2L_HUMAN	0.29023	-0.486285	-0.164632	0.00509966	-0.00509966	-0.0648072	-0.235199	0.0989227
CL065_HUMAN	0.394671	-0.0301866	0.380746	-0.0160487	-0.413656	0.097916	0.0906191	-0.487564
CL073_HUMAN	-0.0401813	-0.136707	0.114172	0.0401813	-0.23153	-0.322165	0.209716	-0.779927
CL16A_HUMAN	0.0766792	0.00242049	0.0062176	0.0816412	0.160114	0.00134916	-0.21307	0.0890023
CLAP1_HUMAN	-0.0408335	-0.0966776	-0.00461417	0.0307831	0.0436825	0.115402	-0.016336	-0.00750475
CLAP2_HUMAN	-0.00610541	-0.0780964	-0.0353829	-0.0182411	0.0729195	0.0306986	-0.0709681	0.0460391
CLC14_HUMAN	0.0120556	-0.0578664	0.0288664	-0.165497	-0.0654039	-0.0120556	-0.0144187	0.0707153
CLCB_HUMAN	-0.0395832	-0.107232	-0.196686	-0.362254	0.251666	0.278208	0.338498	0.0395832
CLCC1_HUMAN	0.00936415	0.169377	0.220166	-0.134065	-0.238028	0.435021	0.241203	-0.0741126
CLCN1_HUMAN	-0.161826	0.0236743	0.0699856	0.350469	-1.24577	-0.113068	0.0173836	-0.0173836
CLD5_HUMAN	0.0538907	-0.171516	0.0123744	-0.238435	0.147331	-0.0123744	0.0249002	-0.339041
CLH1_HUMAN	0.0843858	-0.0138904	-0.104379	0.184486	-0.0672885	-0.0474174	-0.0104325	0.0169959
CLH2_HUMAN	0.0976631	-0.236147	0.190385	0.0443353	-0.0801222	-0.167915	-0.319526	0.0801222
CLIC1_HUMAN	0.221167	-0.126537	0.0124497	0.463096	-0.255301	-0.316589	-0.182831	0.217758
CLIC2_HUMAN	0.168277	0.0465176	-0.0788831	0.00794503	-0.134859	-0.0113657	-0.131922	0.185374
CLIC4_HUMAN	0.129318	0.0551828	-0.0762054	0.091156	-0.00542732	-0.0968504	-0.135969	0.251324
CLIC5_HUMAN	-0.0281044	-0.012829	0.0166091	0.0170534	0.0702783	-0.0180327	0.0118175	0.0272544
CLIP1_HUMAN	0.00394066	-0.0473154	-0.0918933	-0.0555705	0.0568784	0.359595	0.0232476	-0.0663124
CLIP2_HUMAN	-1.13144	0.477546	-0.128691	-0.638272	-0.317836	0.67031	-0.450168	0.474494
CLN6_HUMAN	0.132329	0.365944	0.0705211	-0.0863168	-0.0165423	-0.0991677	0.438893	-0.04782
CLP1L_HUMAN	-0.102509	-0.0663398	0.111622	-0.0534624	-0.342798	0.122424	-0.115843	-0.0750023
CLPB_HUMAN	0.100733	0.0375822	0.0291459	-0.0208009	-0.110941	-0.070646	-0.00529324	-0.0349914
CLPP_HUMAN	0.032379	-0.149815	0.0221077	-0.00798173	-0.0283601	-0.0075571	-0.0240226	0.0299436
CLPT1_HUMAN	-0.0699381	0.0389336	-0.0389336	0.170431	0.278545	-0.213942	-0.0399501	0.00481291
CLPX_HUMAN	0.0305264	-0.0715221	0.153565	0.010029	-0.233418	0.0481108	0.0105967	-0.120427
CLU_HUMAN	-9.85e-05	-0.00140501	0.119239	0.035073	-0.0822086	-0.110522	-0.10619	-0.0881386
CLUS_HUMAN	-0.0301111	0.336963	-0.18268	0.0608961	-0.106704	0.03717	-0.0317039	0.349588
CLYBL_HUMAN	-0.0785722	-0.219385	0.881754	0.285643	0.0158896	-0.119233	-0.438727	0.148266
CMA1_HUMAN	-0.161387	-0.360722	-0.339248	0.342591	0.144666	0.519863	-0.112103	0.632217
CMBL_HUMAN	-0.0161555	0.188617	-0.109679	0.02461	0.454834	-0.176709	-0.00298961	-0.0294809
CMC1_HUMAN	0.0652275	-0.0351215	0.249946	-0.008097	0.0222284	-0.174289	0.0125122	-0.158152
CMC2_HUMAN	0.1379	-0.056855	0.0122657	-0.237515	-0.00935609	-0.46251	0.250563	0.653938
CMC4_HUMAN	0.114746	-0.54118	0.0666494	-0.0666494	-0.0753445	0.0887427	0.179908	-0.193889
CMPK2_HUMAN	0.220456	-0.079546	0.0536171	0.079546	-0.11317	-0.176632	0.0155614	0.0873732
CMTD1_HUMAN	0.0574311	0.000194901	0.12222	0.0877927	0.0324567	-0.216632	-0.371737	0.0495095
CMTR1_HUMAN	-0.47757	0.0870023	0.0575646	-0.0292982	0.0292982	0.229737	-0.583746	0.237516
CMYA5_HUMAN	-0.0248776	-0.0181368	0.0268601	-0.0288864	0.0414832	0.00756353	3.33e-05	-0.00312736
CN37_HUMAN	0.0207911	0.0335357	-0.00335159	0.036101	-0.151888	-0.0615347	-0.124554	0.0879123
CNBP_HUMAN	-0.173877	0.147828	-0.195564	-0.135558	0.306963	-0.0588171	0.164458	-0.343997
CNDP2_HUMAN	-0.0309301	0.0204907	0.0273567	0.0291175	-0.115404	-0.126479	0.0172887	0.119264
CNEP1_HUMAN	0.0840612	0.113574	-0.175823	-0.00537307	-0.0380206	-0.095817	0.00537307	0.188498
CNIH4_HUMAN	-0.150641	0.0907952	0.000109327	0.0360419	0.00647443	-0.0914245	0.198585	-0.0418304
CNKR1_HUMAN	-0.0700196	0.0738635	-0.104991	-0.0481961	0.12129	-0.0525208	0.252133	0.484558
CNN1_HUMAN	0.682582	1.03316	-0.35266	-0.146204	-0.202171	0.420036	-0.209522	1.03559
CNN2_HUMAN	0.170017	0.0478176	-0.197135	1.11427	-0.144534	-0.3406	-0.236091	0.237153
CNN3_HUMAN	0.233065	0.196411	-0.285844	-0.0686012	-0.221411	0.191488	-0.0617795	0.609171
CNNM4_HUMAN	-0.169096	-0.181117	0.0696101	0.245513	-0.030322	0.226691	-0.156587	0.478155
CNO10_HUMAN	-0.095718	0.0399314	-0.0399314	0.095964	-0.136553	0.348574	-0.052778	-0.0720185
CNOT1_HUMAN	-0.112387	0.0237791	-0.0169546	0.0789142	-0.01693	-0.0566489	-0.0905775	0.0169546
CNOT4_HUMAN	-0.0369926	-0.130014	-0.24174	-0.109906	0.237076	0.136681	-0.208505	0.0819345
CNOT7_HUMAN	0.106966	-0.118886	0.010231	0.0296023	0.0211513	-0.257397	0.172896	-0.133527
CNOT9_HUMAN	-0.054383	0.0435372	0.175569	0.0612317	-0.055014	-0.149165	0.0633601	0.00042658
CNPY2_HUMAN	-0.12853	-0.0503933	0.000799604	-0.142967	0.0479488	0.15291	0.12616	-0.024395
CNPY3_HUMAN	-0.0636611	-0.0484346	-0.372711	0.52193	-0.501662	0.108953	0.155979	0.0873204
CNRP1_HUMAN	0.0578328	0.104282	0.186299	0.0463314	-0.404797	-0.333285	-0.100226	0.147449
CNST_HUMAN	-0.0621073	0.021418	-0.223517	-0.0711146	0.215132	-0.0559703	0.125862	-0.0882688
CO2_HUMAN	0.262224	0.670486	-0.118731	0.0162656	-0.152708	-0.0162656	0.0375279	0.868213
CO2A1_HUMAN	0.0428763	0.625365	-0.423969	0.231753	-0.0428763	0.112202	-0.528638	-0.227645
CO3_HUMAN	0.270788	0.452087	-0.237199	-0.0536181	0.00653364	-0.164569	0.107552	0.829445
CO3A1_HUMAN	-0.0215024	-0.0412071	-0.35278	-0.68546	0.316104	0.26077	0.38032	0.382688
CO4A_HUMAN	0.0230453	0.0750623	-0.272351	0.0861228	-0.193227	-0.0880479	0.328487	1.05323
CO4A1_HUMAN	0.108128	-0.0547816	-0.212706	-0.244737	0.112583	0.0194417	-0.0276716	0.0221271
CO4A2_HUMAN	0.226184	-0.038671	-0.369328	-0.288703	0.177472	0.168493	0.0736018	-0.0217542
CO4B_HUMAN	0.195288	0.449541	-0.036514	-0.0867149	-0.129185	-0.152965	-0.228603	0.240685
CO5_HUMAN	0.0839182	0.373438	-0.188606	0.0322702	-0.0948927	-0.191441	0.0129045	0.620993
CO5A3_HUMAN	-0.109068	0.422295	-0.259277	0.259547	-0.60502	0.229169	-0.509194	-0.141139
CO6_HUMAN	0.267815	0.424305	-0.217782	-0.02076	0.02076	-0.0450628	0.126627	1.01272
CO6A1_HUMAN	0.0082397	0.507143	-0.0432266	-0.238315	-0.239451	0.0368034	0.0533569	0.193416
CO6A2_HUMAN	0.0250624	0.389177	-0.0527303	-0.193112	-0.195706	0.0245031	0.0273594	0.166154
CO6A3_HUMAN	0.0149916	0.452501	-0.0632291	-0.203567	-0.159215	0.0267675	0.0259818	0.131517
CO6A6_HUMAN	0.0268976	0.542208	-0.247159	0.0177869	-0.0582249	0.115141	-0.308529	0.0907946
CO7_HUMAN	0.294419	0.565161	-0.188323	-0.0441084	0.0556252	-0.0601384	0.00742775	0.841828
CO8A_HUMAN	0.161508	0.389057	-0.0934869	-0.0754769	-0.0190437	-0.164888	0.176364	0.671839
CO8B_HUMAN	0.0480948	0.233654	-0.032649	-0.0331003	0.000811821	-0.207223	0.100465	0.588785
CO8G_HUMAN	0.421307	0.483712	-0.165215	0.0950009	-0.0440444	-0.202861	0.00391274	0.840827
CO9_HUMAN	0.12695	0.40071	-0.0753668	-0.0367468	-0.0438674	-0.197689	0.0367468	0.478241
COA1_HUMAN	0.363766	-0.292129	0.378992	0.202398	-0.127871	-0.0606022	0.0064833	-0.238846
COA3_HUMAN	0.0068448	-0.133748	0.140724	-0.0796241	-0.112459	0.149189	-0.0068448	0.0668227
COA4_HUMAN	0.632812	-0.0954216	-0.190792	0.340206	0.504273	0.141863	-0.297847	-0.192576
COA5_HUMAN	0.125285	-0.128483	0.189725	-0.18343	0.0262195	0.0466138	0.00782966	-0.297711
COA6_HUMAN	0.0785119	-0.03646	0.280791	0.0344981	0.0292312	-0.184408	-0.0548751	-0.308669
COA7_HUMAN	0.0300045	0.0515586	0.0653527	-0.0241343	0.0340925	-0.0109927	-0.086458	-0.0690137
COAC_HUMAN	0.0837468	-0.146382	-0.0799937	-0.060822	-0.324963	-0.215473	0.0317564	0.340591
COASY_HUMAN	0.09215	-0.0845305	-0.0145215	0.0497549	0.22798	-0.0363759	0.0581442	-0.052243
COBL_HUMAN	0.0081476	-0.00307596	-0.110229	-0.436447	0.203801	0.0463688	0.0731352	-0.0176609
COBL1_HUMAN	0.20252	0.0196774	-0.0845818	0.0599724	-0.0644764	0.116733	-0.0410316	0.309349
COCA1_HUMAN	0.0470952	0.62057	-0.183436	-0.0638782	0.000672751	-0.0039885	0.00260122	0.069981
COEA1_HUMAN	0.395985	0.713994	-0.204417	-0.0524622	-0.310983	0.253785	-0.395329	0.702441
COF1_HUMAN	-0.0204016	-0.0888179	0.0255438	0.129585	0.112849	-0.221129	-0.0255438	0.0734263
COF2_HUMAN	0.00294501	-0.109955	0.0487675	-0.00841707	0.0171513	0.0114815	-0.00114917	0.00841707
COFA1_HUMAN	0.135897	-0.0528637	-0.00929881	0.0531758	-0.0192576	0.0200663	-0.0166318	0.025395
COG1_HUMAN	0.02169	0.275832	-0.0324894	-0.0104726	-0.0516196	-0.0763368	-0.0430974	-0.0577457
COG2_HUMAN	0.0335167	0.00333635	-0.0914708	-0.0681711	0.148602	0.0152479	0.00443888	-0.0881591
COG3_HUMAN	-0.0728126	0.0679879	-0.00175883	-0.0333326	-0.0427283	0.065795	-0.0512735	0.183398
COG4_HUMAN	0.0477866	-0.0325066	-0.381095	-0.153381	-0.558543	0.0389491	0.188444	0.000865749
COG5_HUMAN	-0.654387	-0.000412895	-0.433376	0.33694	-1.33883	0.0941121	0.203819	0.000412895
COG6_HUMAN	-0.0374142	0.0882893	0.0685287	0.158833	-0.175189	0.00138044	0.0973524	-0.0534339
COG7_HUMAN	0.168083	-0.0301697	-0.0917638	0.32732	-0.180316	0.0893032	-0.164414	0.298813
COG8_HUMAN	-0.252342	0.112779	-0.111956	-0.320673	-0.421841	0.130286	0.0710888	-0.032094
COIA1_HUMAN	0.00242936	0.177628	-0.137356	-0.207075	-0.0345136	0.0420337	0.0205055	0.239186
COIL_HUMAN	-0.0404562	0.138406	0.253617	0.00305976	-0.119044	-0.359457	0.0544606	-0.159984
COMD3_HUMAN	0.0244842	-0.643795	0.0891255	0.0779155	-0.0612033	-0.38282	0.00103756	0.15442
COMD4_HUMAN	0.395556	-0.011025	0.011025	0.0735985	-0.171006	-0.335274	-0.261205	0.0704598
COMD5_HUMAN	0.0725249	-0.0741325	0.213331	0.116313	0.154383	-0.11144	-0.0926084	-0.125901
COMD6_HUMAN	0.0740461	-0.226899	0.0086687	0.175338	-0.100902	-0.263493	-0.0771428	0.0408353
COMD7_HUMAN	-0.121341	-0.0129549	0.0533754	-0.0373234	0.414119	0.0129549	-0.227675	-0.114516
COMD8_HUMAN	0.11337	-0.051176	-0.121199	0.134547	-0.0362393	-0.00654473	0.135041	0.0362393
COMD9_HUMAN	0.217121	0.0659876	-0.0101778	0.0101778	-0.0744174	-0.0338182	-0.0756372	0.0486842
COMDA_HUMAN	-0.148233	-0.231686	0.0893096	0.0123347	0.0528781	-0.140735	-0.0121049	0.123009
COMP_HUMAN	0.0768009	1.11593	-0.21485	-0.0525551	0.174427	-0.0658397	0.685727	-0.0968046
COMT_HUMAN	-0.0613513	0.0891946	-0.114752	-0.0769722	0.0189865	0.116555	-0.131626	0.0854999
COPA_HUMAN	0.0150478	-0.0155237	-0.150638	0.172523	0.115034	-0.0341326	-0.0142415	0.0341326
COPB_HUMAN	0.00594051	0.00415107	-0.0477022	0.0275939	-0.0248587	0.0790145	-0.0203452	-0.0412517
COPB2_HUMAN	0.083387	-0.0378705	-0.135474	0.0751643	0.0920209	-0.0678608	-0.0278061	0.00902242
COPD_HUMAN	0.0314185	0.016576	-0.0387665	0.0577373	-0.0410297	0.028988	0.018065	-0.163891
COPE_HUMAN	0.12942	-0.0502821	-0.0748125	0.0132783	-0.00289098	0.00289098	-0.0811227	0.0495899
COPG1_HUMAN	0.0292756	0.0445787	-0.173637	0.0706719	0.171262	-0.0719786	0.0541453	0.028937
COPG2_HUMAN	-0.00234754	0.0266812	-0.0785987	0.168463	0.167041	-0.0151751	-0.0278016	-0.0266812
COPZ1_HUMAN	0.190108	-0.0415932	0.0455742	0.0441837	0.0916802	-0.108122	0.0479001	-0.0455742
COPZ2_HUMAN	0.00989763	0.17659	-0.0665373	-0.00508889	0.194218	-0.324347	0.00508889	0.362448
COQ3_HUMAN	0.385945	-0.0595555	0.141136	0.137714	-0.000153663	-0.191678	-0.0608207	-0.296675
COQ5_HUMAN	0.120569	-0.0727816	0.36651	0.162495	-0.0932353	-0.25291	-0.0980891	-0.13292
COQ6_HUMAN	0.152029	-0.16284	0.231588	0.106246	0.0155405	-0.0841961	-0.0480832	-0.130206
COQ7_HUMAN	0.143808	-0.0961175	0.2068	0.0716036	-0.031047	-0.0635781	-0.0921904	-0.107286
COQ8A_HUMAN	0.194039	-0.111879	0.0507462	0.1332	-0.0186713	-0.268318	0.0527164	-0.0653751
COQ9_HUMAN	0.102266	-0.0929397	0.0963526	0.0845823	-0.030548	-0.191205	-0.0432341	-0.00237598
COR1A_HUMAN	-0.509168	-0.483997	0.0442646	-0.636256	0.411791	-0.537609	0.108748	0.130228
COR1B_HUMAN	0.036053	0.113055	-0.0491444	0.211379	-0.077377	0.0698817	-0.0898997	0.332165
COR1C_HUMAN	0.100567	0.00575116	-0.163876	0.352125	-0.235808	-0.0497975	-0.310647	0.171167
CORO6_HUMAN	0.0898957	0.0223868	-0.0768924	-0.0861439	-0.0696521	0.0350956	0.0320105	-0.0289542
CORO7_HUMAN	-0.110668	0.0286411	0.0293344	0.0205985	-0.0591535	-0.140693	-0.00443663	0.102052
COTL1_HUMAN	0.0399072	-0.0378706	-0.0399072	0.657324	-0.0911921	-0.209877	-0.0219476	-0.0390865
COX1_HUMAN	0.351134	-0.116273	0.203994	0.233894	-0.0451909	-0.191062	-0.157243	-0.185238
COX11_HUMAN	-0.0060137	-0.103556	0.220641	-0.0121486	-0.021486	-0.279698	0.141305	0.093109
COX15_HUMAN	0.232717	-0.312656	0.148401	-0.03309	0.165659	-0.610124	-0.164049	0.154084
COX19_HUMAN	0.041438	0.0656937	0.110482	-0.0497135	-0.213168	-0.168103	-0.0254564	0.0376575
COX2_HUMAN	0.296732	-0.0634177	0.398182	0.0707867	-0.059535	-0.208761	-0.012999	-0.164239
COX20_HUMAN	1.06694	-0.259262	0.405496	0.113838	-0.162788	-0.0754249	-0.185762	0.0754249
COX41_HUMAN	0.334921	-0.237451	0.277783	0.144966	-0.00515934	-0.315793	-0.00842485	-0.154407
COX5A_HUMAN	0.325561	-0.197999	0.469035	0.244265	-0.266033	-0.319977	-0.0536686	-0.630907
COX5B_HUMAN	0.210322	0.00419102	0.236986	0.184246	-0.10813	-0.114668	-0.0957732	-0.165706
COX7C_HUMAN	0.325184	-0.46208	0.467207	0.166427	-0.357812	-0.528407	-0.134156	0.214345
COX7R_HUMAN	0.563793	-0.305733	0.242861	0.232968	-0.0176113	-0.139444	-0.0474116	-0.104814
COXM1_HUMAN	0.542897	-0.0256498	0.458247	-0.0522862	-0.346599	-0.0111907	-0.232818	-0.0643971
CP062_HUMAN	0.000712968	0.0194777	0.0154389	0.0461076	0.000856329	-0.0204003	-0.196458	0.0891688
CP20A_HUMAN	0.00943832	0.111436	0.0649171	0.173758	0.097389	-0.0634117	-0.0888952	-0.0591372
CP27A_HUMAN	0.0312657	0.0827654	0.206497	0.22625	-0.215869	-0.226578	-0.0571224	-0.149942
CP2J2_HUMAN	-0.0578329	-0.0787579	0.126655	-0.211728	0.0984811	0.46191	0.479483	-0.0572684
CP51A_HUMAN	-0.304397	-0.183824	-0.0228754	0.229246	0.0151487	-0.0151487	0.0884752	-0.300728
CPEB3_HUMAN	0.0281726	-0.115143	0.0548531	0.122437	0.135262	0.039364	-0.077445	-0.0751989
CPIN1_HUMAN	0.110323	-0.0897277	-0.0646517	0.107159	-0.31919	0.179521	0.0443808	0.154752
CPN2_HUMAN	0.191029	0.177222	-0.238918	0.301551	-0.190994	-0.182601	-0.190042	0.626552
CPNE1_HUMAN	0.322359	-0.725392	0.129944	0.42288	-0.228702	0.0885324	0.151876	-0.168646
CPNE2_HUMAN	-0.0100461	0.0137189	-0.196359	0.00751372	-0.0289891	-0.0169724	-0.00129926	0.423328
CPNE3_HUMAN	0.122131	-0.0470515	-0.22741	-0.00460036	0.105964	-0.0384036	0.0399421	0.042338
CPNS1_HUMAN	-0.00453125	-0.0371253	-0.0527128	0.108826	0.00122281	-0.0936419	0.102102	0.0740863
CPPED_HUMAN	0.113236	-0.0716156	0.099562	0.0736715	-0.0880932	-0.475679	-0.0472775	0.0729438
CPSF1_HUMAN	-0.0188903	-0.204004	-0.0082009	-0.0801058	-0.0269121	-0.0163941	0.0300487	0.253943
CPSF2_HUMAN	-0.0118758	-0.0522458	-0.0715773	0.0356052	0.099634	-0.045236	0.0168549	0.036526
CPSF5_HUMAN	0.0569807	0.00305293	-0.0889333	0.0826551	-0.080977	0.0598987	-0.102259	0.0908377
CPSF6_HUMAN	0.0688597	-0.177054	-0.132184	0.0559473	-0.0567766	0.107294	0.0109434	-0.00838828
CPSF7_HUMAN	0.1083	0.0640964	-0.0690078	-0.0601554	0.0889422	-0.108351	-0.00726401	0.104099
CPSM_HUMAN	0.167363	-0.300919	-0.226438	0.666779	0.0328939	-0.0719188	0.0223865	-0.172729
CPT1A_HUMAN	0.163432	-0.0699216	-0.0011161	0.354773	-0.67364	-0.233039	-0.351606	0.123649
CPT1B_HUMAN	0.172138	-0.20403	0.241953	0.115421	-0.0456675	-0.0616917	-0.0991967	-0.0432927
CPT2_HUMAN	0.21108	-0.114001	0.320072	0.164189	-0.198895	-0.0297481	-0.0641866	-0.309468
CPTP_HUMAN	-0.0503378	-0.00473143	0.033083	0.0601777	0.0423118	-0.146585	-0.0472129	0.207991
CPVL_HUMAN	-0.18811	0.170762	0.00265877	0.166174	-0.613763	-0.221524	-0.0503018	0.237539
CPZIP_HUMAN	-0.12104	-0.0795064	-0.056081	-0.0128291	0.44049	-0.0499387	0.131757	0.123096
CQ10A_HUMAN	0.323603	-0.0374527	0.205772	-0.0767989	0.027566	-0.235189	0.015319	-0.0548898
CQ10B_HUMAN	0.453193	-0.151335	0.31053	0.101534	0.19195	-0.550893	-0.33961	-0.0188532
CR025_HUMAN	0.0847576	-0.184885	0.0112319	0.21578	0.294449	0.513801	-0.0520013	-0.132627
CRAC1_HUMAN	0.111393	0.439153	0.385424	-0.380809	-0.245175	0.420169	-0.0475233	0.00481338
CRADD_HUMAN	-0.0570474	0.030525	0.0988644	0.123403	-0.0519464	-0.0893876	0.0293948	0.0370354
CRBG3_HUMAN	0.425061	-0.218556	-0.0119732	0.370025	-0.964038	0.0267504	0.174394	-0.119994
CRBN_HUMAN	-0.048931	-0.0766581	-0.00967033	-0.0423183	0.0190908	-0.0638111	0.085006	-0.0103356
CREL1_HUMAN	-0.133509	-0.00688939	0.128694	-0.0376276	0.0130427	0.0647617	-0.0853286	0.0658004
CRIP2_HUMAN	0.432652	0.363925	-0.179267	-0.199664	-0.245932	0.190158	-0.0251744	0.950561
CRK_HUMAN	0.0363569	-0.0324605	0.0184709	-0.0058699	0.0927288	0.0561198	-0.122017	0.15034
CRKL_HUMAN	0.048183	-0.060393	-0.0857051	0.036844	-0.0242477	0.00409822	0.00407808	-0.0166279
CRLF3_HUMAN	0.0259407	0.0622569	0.053291	0.0861722	-0.218344	-0.555457	-0.110945	-0.143497
CRNS1_HUMAN	0.170745	-0.0555158	-0.0237602	0.0958188	0.030883	-0.235808	0.0030062	0.119215
CRTC1_HUMAN	0.149833	0.108356	0.139736	0.410003	-0.122835	-0.240985	-0.262449	0.108052
CRYAB_HUMAN	0.0490106	-0.0564617	0.0303858	-0.0153583	0.0255275	0.0337675	-0.0190466	-0.15352
CRYL1_HUMAN	0.0270789	-0.0168105	-0.0159863	0.0117929	0.016648	-0.0132611	-0.0461877	0.0666899
CRYM_HUMAN	-0.122008	1.05839	-0.058026	-0.108207	1.65086	-0.057362	1.48977	-0.0175123
CS012_HUMAN	-0.181353	-0.0200908	0.277112	0.128433	0.0737386	0.00605847	0.103657	-0.103241
CS025_HUMAN	-0.747722	-0.187614	0.149511	0.0134717	-0.0965903	-0.262164	-0.0955518	0.409563
CSCL2_HUMAN	0.180229	-0.0262821	-0.0600959	0.292005	-0.0488259	-0.0363724	0.0262821	0.325644
CSDE1_HUMAN	-0.0452887	-0.0454707	-0.078913	-0.116735	0.0725069	0.0776092	0.0341895	0.0781576
CSK_HUMAN	0.00226099	-0.245931	-0.0540575	0.336911	0.111949	-0.0459736	-0.069665	0.21336
CSK21_HUMAN	0.0117898	0.00810512	0.0377029	0.00753665	0.00338385	-0.00810512	-0.00338385	-0.0270216
CSK22_HUMAN	-0.123747	0.103988	-0.0246871	-0.286868	0.0424009	-0.0785634	0.268191	-0.00360583
CSK2B_HUMAN	0.050881	0.00503729	-0.0026296	-0.01829	-0.0768844	0.0451572	-0.029894	0.0529468
CSKI2_HUMAN	-0.26123	-0.305814	-0.160582	0.810192	0.160582	-0.218237	-0.164661	1.24507
CSKP_HUMAN	-0.134517	0.0977622	-0.24969	-0.464083	-0.519661	0.161183	0.274549	0.188441
CSN1_HUMAN	0.0570212	-0.082609	-0.0250313	0.0977855	0.104146	-0.126852	0.000718098	-0.000718098
CSN2_HUMAN	0.0154756	-0.0080656	-0.0567626	-0.00917799	0.0671912	-0.0638375	0.00524227	0.0125176
CSN3_HUMAN	0.004848	-0.012101	-0.0358741	-0.0366	0.13256	-0.0624553	-0.059791	-0.0657038
CSN4_HUMAN	0.0274947	-0.00800606	-0.0218595	0.0516602	0.0585442	-0.102497	-0.0165303	0.0190075
CSN5_HUMAN	0.0120307	-0.0796685	-0.0217994	0.0254949	0.0918678	-0.0256559	-0.00443717	-0.00746731
CSN6_HUMAN	0.0242395	-0.0569575	-0.146257	-0.0114584	0.211599	-0.091352	-0.0730301	0.0737264
CSN7A_HUMAN	0.0182985	-0.0253616	-0.0311711	0.0786329	0.18963	-0.0538554	0.0138533	-0.12828
CSN7B_HUMAN	0.0876443	-0.160258	0.0281675	0.0510544	-0.158816	-0.038553	-0.0543252	0.036472
CSN8_HUMAN	-0.0178766	-0.00335872	-0.0425502	0.0105247	0.0374435	0.0178255	0.0431309	0.00446032
CSN9_HUMAN	-0.0484064	0.0484064	0.129465	-0.153416	0.333367	-0.188273	-0.0520557	-0.115716
CSPG2_HUMAN	-0.0286176	0.374071	-0.229121	-0.159681	-0.0847753	0.228177	0.245229	0.0771617
CSPG4_HUMAN	0.0956982	-0.0206992	-0.0755376	-0.0129904	-0.0316764	0.145211	-0.0888075	0.124849
CSRP1_HUMAN	0.325725	0.32048	-0.300208	0.0817231	-0.378999	0.241876	-0.111601	0.407077
CSRP2_HUMAN	0.0612636	0.357199	-0.507652	-0.358185	-0.0612636	0.156749	-0.113813	0.555238
CSRP3_HUMAN	0.0108364	-0.11042	0.165653	-0.11789	-0.226357	0.359559	-0.133998	0.0178946
CT024_HUMAN	-0.074563	0.00738714	-0.062667	-0.0904164	0.495535	-0.0429899	0.113762	-0.0355495
CT027_HUMAN	-0.10978	0.77353	0.0956171	0.00833704	-0.0213962	-0.309266	-0.324911	0.148308
CTBP1_HUMAN	0.147105	-0.0488659	0.00310118	-0.0236176	0.0506062	-0.0641351	-0.102355	-0.0637494
CTBP2_HUMAN	0.224519	-0.016375	-0.207158	-0.129389	0.207343	-0.0199302	0.397827	-0.0188124
CTCF_HUMAN	0.0884101	0.212213	-0.212564	-0.306854	0.154865	0.0515921	0.0672948	0.368178
CTF1_HUMAN	-0.190305	0.0523035	0.125605	-0.109086	-0.150257	-0.268254	0.122191	0.2298
CTL1_HUMAN	0.162247	-0.00838135	0.192083	0.163374	-1.09e-05	-0.10748	1.09e-05	0.0931452
CTL2_HUMAN	-0.0119449	-0.00153466	-0.125603	-0.214345	0.0903639	0.126309	0.24863	-0.0286488
CTNA1_HUMAN	0.0793649	-0.057468	-0.00639613	0.0911351	-0.0620694	0.107405	-0.10278	0.0261549
CTNA3_HUMAN	0.123019	-0.0917467	-0.0151691	-0.0911955	0.0484278	0.0562726	-0.0690885	-0.0424723
CTNB1_HUMAN	0.000677674	0.0242386	-0.0164257	-0.00687671	0.00349175	0.00107889	-0.0657523	0.0167062
CTND1_HUMAN	0.114324	0.016347	-0.0178124	0.012655	-0.0274349	0.0351996	-0.105401	0.0374076
CTR9_HUMAN	-0.244536	-0.201171	0.0261089	-0.194601	-0.0290253	0.0407008	0.316889	0.596396
CTU2_HUMAN	0.0642816	0.0443569	-0.346612	-0.0725775	0.010041	-0.180998	-0.149257	-0.0135542
CUED1_HUMAN	0.215595	-0.262103	0.0133304	0.168944	-0.168441	-0.206722	-0.0133304	0.09105
CUL1_HUMAN	0.106945	0.0145542	-0.000611693	0.038332	0.000634976	-0.0868627	-0.112249	-0.0131891
CUL2_HUMAN	0.00603615	0.038202	-0.1014	0.0173391	-0.0378724	-0.0920954	-0.121313	0.0549925
CUL3_HUMAN	0.0748483	-0.0720639	-0.105371	0.0218885	0.0642131	-0.0677852	-0.0460515	0.00854802
CUL4A_HUMAN	0.16316	-0.0811774	-0.0548899	0.160879	-0.012794	-0.201233	0.0214868	0.0460538
CUL5_HUMAN	0.0677759	-0.0288291	-0.169484	-0.0136262	0.223889	-0.100351	0.0285304	0.0716591
CUTA_HUMAN	-0.0861151	-0.0411215	-0.102566	0.20551	0.0411215	-0.471427	0.103563	0.12992
CUTC_HUMAN	-0.00633479	0.00844322	0.0123581	-0.0862577	-0.032909	0.180165	0.0203475	0.0290849
CWC15_HUMAN	-0.601983	-0.0171865	-0.0210561	-0.193482	-0.190924	0.304611	0.102948	0.347302
CWC27_HUMAN	0.23793	0.167518	-0.228925	-0.186897	0.295084	-0.167518	-0.306311	-0.251832
CX6A1_HUMAN	0.203088	-0.368264	0.163369	0.323574	-0.374368	-0.32737	-0.15916	0.044889
CX6A2_HUMAN	0.070524	-0.173591	0.143917	0.0513683	0.171779	-0.154549	-0.00639765	-0.309016
CX6B1_HUMAN	0.160753	-0.122297	0.085203	0.111505	-0.0664597	-0.146699	0.010243	-0.220116
CX7A1_HUMAN	0.501303	-0.126788	0.698846	0.281254	-0.227583	-0.288524	-0.124812	-0.214197
CX7A2_HUMAN	0.836843	-0.480069	0.681493	0.643149	-0.14395	-0.311294	-0.258741	0.258741
CXCL7_HUMAN	0.304612	0.0198321	-0.126654	1.20158	-0.0955039	-0.00640875	-0.15879	-0.232814
CY1_HUMAN	0.252638	-0.0858187	0.318739	0.186853	-0.0091905	-0.218276	-0.0289578	-0.142947
CY24B_HUMAN	0.128526	0.0642758	-0.385885	0.316201	0.0125488	-0.174773	-0.112385	-0.0336008
CYB_HUMAN	0.300434	-0.340007	0.153419	-0.0469137	-0.00203467	-0.0540943	0.22726	0.00203467
CYB5_HUMAN	0.290225	0.0346143	0.385229	0.181347	-0.151246	-0.0771318	-0.0642975	-0.344385
CYB5B_HUMAN	0.148574	0.0231977	0.171763	0.0548015	-0.0828728	0.0147384	-0.00776618	-0.0928656
CYBP_HUMAN	0.208932	-0.0673155	0.0113162	-0.0778078	-0.0680343	0.035354	-0.107204	0.0665058
CYC_HUMAN	0.390255	-0.1408	0.473667	0.202325	-0.0575469	-0.27886	-0.0444357	-0.196402
CYFP1_HUMAN	0.0340687	-0.116338	-0.0127576	0.0327363	-0.0763326	-0.0128355	0.0112324	-0.06981
CYGB_HUMAN	-0.0079331	0.102254	0.0079331	0.161556	-0.232104	-0.490968	-0.190416	0.135438
CYH1_HUMAN	0.173243	-0.152908	0.00503019	-0.0406806	0.230361	0.0436952	-0.0948886	0.0397691
CYH2_HUMAN	-0.197513	-0.234354	-0.00187701	0.0638189	0.399218	0.011365	0.0501613	-0.191519
CYLD_HUMAN	0.000577065	0.262974	-0.0667903	0.0398305	0.263665	-0.0595254	-0.000577065	0.36347
CYTA_HUMAN	0.208138	-0.435063	0.11389	-0.138894	-0.382512	0.245305	0.057246	0.0241805
CYTB_HUMAN	-0.0615794	-0.0506925	-0.0260541	0.100937	0.0457184	-0.00566713	0.199692	0.0325648
CYTC_HUMAN	-0.0667453	0.301141	0.117506	-0.135966	-0.0155207	-0.0774517	0.0134474	0.0914165
CYTSA_HUMAN	0.0425745	-0.0599423	0.0697286	0.0576794	0.0294924	-0.238901	-0.318947	-0.100021
D2HDH_HUMAN	0.0756623	-0.13504	0.00654102	-0.0428482	0.134665	-0.00461601	-0.0109121	-0.0158826
D39U1_HUMAN	0.0902315	0.0296145	0.0896371	-0.153916	-0.096238	-0.0373268	0.0398777	-0.0361821
DAAF5_HUMAN	-0.0774287	0.0207878	-0.199992	-0.12237	0.214468	0.0541501	0.0925355	0.0308361
DAAM1_HUMAN	0.211069	-0.142289	-0.000981676	0.613679	-0.211281	0.109938	-0.149393	0.161923
DAB2_HUMAN	-0.160368	0.645198	-0.630876	1.07245	-0.00677964	0.00677964	0.929117	-0.0335218
DAF_HUMAN	0.026102	0.139054	-0.0952624	-0.0179805	-0.0632651	0.0328476	0.00628353	0.0937795
DAG1_HUMAN	-0.00612366	-0.0307088	0.00480596	-0.0897765	-0.0516289	0.0298876	0.0694448	-0.0297957
DAPK2_HUMAN	-0.0201277	-0.0955831	-0.255204	-0.111285	0.331534	-0.0831457	0.0937168	0.105562
DAZP1_HUMAN	0.040569	-0.161425	0.0169039	0.0246337	0.0262805	0.00290719	-0.0969314	0.0354758
DBLOH_HUMAN	0.345901	-0.25321	0.108865	0.102555	-0.147869	0.0410481	-0.258549	-0.128554
DBNL_HUMAN	0.110917	-0.16851	-0.0429607	0.373559	-0.257724	0.0416687	-0.109248	0.114193
DC1I2_HUMAN	-0.0330232	-0.0206091	-0.0791498	0.000178365	0.0147249	0.0559296	0.0620093	0.0398236
DC1L1_HUMAN	-0.0150217	-0.0101493	-0.116099	0.00239637	-0.024343	0.0608997	0.0610152	0.0286576
DC1L2_HUMAN	0.165127	-0.0332426	-0.158743	-0.202792	-0.411766	0.287685	0.0344393	-0.107141
DCA11_HUMAN	0.0375311	0.000684783	0.0449405	-0.0517888	0.0469238	0.0399026	-0.142294	-0.0334213
DCA13_HUMAN	0.0896204	-0.0896204	0.149672	0.26761	-0.599089	-0.14414	-0.139541	0.309998
DCAF1_HUMAN	0.123047	0.115532	0.00562922	0.0930561	-0.369051	-0.36662	-0.00429921	0.0289692
DCAF6_HUMAN	0.0375109	-0.020195	0.017261	-0.0649105	0.0511724	-0.0118421	-0.01345	0.00970405
DCAF7_HUMAN	0.113716	-0.156712	0.00406802	-0.0710588	0.107381	0.175921	-0.0602874	-0.179156
DCAF8_HUMAN	0.0115362	-0.0706299	-0.0568732	-0.0350366	0.106086	0.0860402	0.164204	-0.00796048
DCAKD_HUMAN	0.220302	-0.185443	0.0432464	0.294221	0.0307199	-0.165056	0.0516043	-0.195849
DCD_HUMAN	0.268322	0.237475	-0.145752	-0.182948	2.62786	0.566235	-0.723345	0.145752
DCLK1_HUMAN	0.0980228	0.0350536	0.133046	0.152633	-0.648852	-0.0502825	0.35299	0.128367
DCMC_HUMAN	0.365329	-0.041462	0.172957	-0.00937729	0.041462	-0.226224	-0.163407	0.11192
DCNL1_HUMAN	-0.0552486	0.00263078	0.141444	0.204215	0.0129884	-0.246343	-0.123477	-0.121703
DCNL2_HUMAN	-0.0320922	-0.0471458	-0.106191	-0.0238717	0.109156	0.0148299	0.201989	0.0170114
DCNL4_HUMAN	-0.219206	-0.29812	-0.00250908	0.180355	-0.156325	0.256127	0.0669734	0.0989286
DCP1B_HUMAN	0.124163	-0.0427473	-0.0609758	0.411684	-0.0660349	-0.0177448	-0.355402	0.0810275
DCPS_HUMAN	-0.513295	0.0209648	-0.00341072	-0.0209648	-0.0292276	0.0214791	-0.0140596	0.107978
DCTN1_HUMAN	0.00555572	-0.0337403	-0.0298436	-0.0262547	0.0300056	-0.00555572	0.00337346	0.00942337
DCTN2_HUMAN	0.01681	-0.00504721	-0.0163502	-0.0219723	-0.00802155	0.0132969	0.00479979	-0.0111488
DCTN3_HUMAN	-0.107156	-0.00951802	0.0796935	0.0635585	-0.0958281	0.00483882	-0.0830186	-0.00738768
DCTN4_HUMAN	-0.0496361	-0.112624	-0.0466778	-0.0693671	0.0527902	0.0949365	0.086478	0.010332
DCTN6_HUMAN	-0.0427493	-0.137128	-0.0349442	-0.00335875	-0.041754	-0.024844	0.0203195	-0.0162527
DCTP1_HUMAN	0.165879	-0.0493991	-0.0124566	0.0789704	0.12229	-0.345102	-0.048568	-0.307054
DCUP_HUMAN	0.279293	-0.0407365	0.369935	0.249127	-0.16525	-0.222117	-0.0958215	0.218624
DCXR_HUMAN	0.515485	-0.168615	0.367739	0.049805	-0.0555111	-0.167587	-0.355235	0.00574105
DD19A_HUMAN	-0.0374165	-0.0111249	-0.190595	0.106772	0.0734913	0.0374165	0.098306	0.00683168
DD19B_HUMAN	-0.147305	0.129798	0.0374724	-0.00955548	0.216107	-0.0778888	0.0890978	-0.0575822
DDA1_HUMAN	0.0117727	-0.0595536	-0.0635648	-0.133415	0.146657	0.148156	-0.0363037	0.173968
DDAH1_HUMAN	-0.337806	0.0843562	-0.156048	-0.464931	0.12739	0.131445	0.0139152	0.191457
DDAH2_HUMAN	0.190573	-0.0407466	-0.120821	0.0323018	0.0608276	-0.0940663	-0.0316167	0.302877
DDB1_HUMAN	0.0931931	-0.0122273	-0.0391692	-0.00211025	0.107081	-0.115096	0.00598572	0.0169522
DDI2_HUMAN	0.0908558	-0.133634	0.0434975	0.0713792	-0.119877	-0.240962	-0.314593	0.120808
DDRGK_HUMAN	0.0401552	-0.0480137	-0.0328509	-0.000847422	-0.103165	0.078687	-0.0828919	-0.0200744
DDX1_HUMAN	0.00377845	-0.0405038	-0.0462058	-0.0505912	0.0449829	0.00115668	0.0373797	0.0218703
DDX17_HUMAN	0.00563192	0.0138393	-0.0358888	-0.0865953	-0.0840468	0.0783386	0.022233	0.133793
DDX18_HUMAN	0.265323	0.0547521	-0.857174	-0.28652	0.0309053	0.176586	-0.0309053	-0.05436
DDX21_HUMAN	-0.110112	-0.125868	-0.13678	0.0113287	-0.0120869	0.119132	-0.091569	0.0745569
DDX23_HUMAN	-0.0621271	0.0158592	-0.0149121	-0.193411	-0.156861	0.1163	0.0879486	0.0731929
DDX24_HUMAN	0.116992	-0.0191096	-0.221572	0.227264	-0.0741203	0.0191096	0.0068224	0.16365
DDX27_HUMAN	-0.103224	-0.0711936	-0.000340213	-0.125377	0.0419446	0.0975868	-0.0585441	0.0348444
DDX28_HUMAN	-0.00994528	0.154373	0.158613	-0.0880454	-0.213606	-0.119444	-0.0683042	-0.0208285
DDX3X_HUMAN	0.0202523	-0.0410622	0.0194802	-0.0489809	0.0374517	0.196235	-0.0752392	0.160424
DDX3Y_HUMAN	-0.348856	0.379799	-0.439344	0.348856	0.43472	-0.739301	0.615495	-0.606665
DDX41_HUMAN	-0.0182574	0.00333612	-0.058219	0.000341711	-0.0801646	0.0470459	0.0656053	-0.120532
DDX42_HUMAN	0.0360365	-0.186374	0.00832657	0.111784	0.02353	0.350236	0.0139235	-0.0196483
DDX46_HUMAN	0.12821	-0.00531374	-0.218633	-0.0810501	-0.136838	0.25005	0.0833112	-0.0553917
DDX47_HUMAN	0.177811	-0.00521299	-1.15108	0.00521299	0.632224	0.624176	-0.787517	-1.83717
DDX5_HUMAN	0.0205042	0.0206466	-0.123655	-0.00518155	0.00518155	0.064865	-0.142075	-0.0268697
DDX50_HUMAN	-0.0209186	-0.0533956	0.0360735	0.105118	-0.0406854	0.171023	-0.132876	0.0209186
DDX54_HUMAN	0.0561306	-0.236493	-0.103266	0.119352	-0.0235209	-0.250565	-0.0486853	0.113357
DDX56_HUMAN	-0.476497	0.361562	0.510153	0.203433	0.8721	-0.705081	0.14979	-0.905392
DDX58_HUMAN	0.0786174	0.0147226	-0.0526444	-0.0244716	-0.0571205	-0.26496	0.0115146	0.251538
DDX6_HUMAN	0.0233553	-0.0720753	0.0255154	0.0063992	-0.154879	0.0816117	-0.0560622	0.0760258
DDX60_HUMAN	0.0508585	0.00338604	-0.013761	0.108489	-0.860889	0.0840557	-0.00579505	0.44966
DECR_HUMAN	0.394432	-0.0437852	0.391942	0.0787628	-0.00718272	-0.211162	-0.0666626	-0.15898
DECR2_HUMAN	0.0570472	0.02295	0.0222899	-0.421281	-0.0281307	-0.00336926	0.00336926	-0.00591281
DEF4_HUMAN	0.0393528	0.187675	-0.0393528	1.00681	-0.316293	-0.098795	-0.111903	0.18904
DEFM_HUMAN	0.129672	-0.159224	0.00718847	0.095689	-0.260591	-0.0280752	-0.0980541	-0.00140062
DEK_HUMAN	0.0976484	-0.0909748	-0.010981	-0.0755943	-0.010432	-0.00247088	-0.00305236	0.177241
DEMA_HUMAN	0.106961	0.0948329	0.091095	0.549615	-0.158509	-0.418202	-0.430439	-0.0850228
DEN1A_HUMAN	-0.164301	-0.219265	0.236548	-0.0323345	0.0154233	0.519742	0.274412	-0.191728
DEN4B_HUMAN	0.148445	0.0373852	0.00693747	-0.124615	0.212657	-0.463075	-0.252771	-0.0997646
DEN4C_HUMAN	0.0489577	0.1907	-0.0672763	0.00447801	-0.261898	0.160886	-0.0489577	0.0610135
DENR_HUMAN	-0.0220928	-0.103482	0.020369	0.0660349	0.0834166	0.0541945	0.106031	-0.0164245
DEOC_HUMAN	-0.0572946	0.0765724	0.0230937	0.144651	-0.0675347	-0.125093	-0.0939262	0.343177
DERL1_HUMAN	0.0625688	-0.0625688	0.193475	0.169337	-0.301705	-1.13509	-0.832609	0.491756
DERL2_HUMAN	0.0535878	0.180093	-0.438386	0.0989972	0.654673	-0.280375	-0.0535878	0.138622
DERM_HUMAN	0.0344776	0.83296	-0.219321	-0.115928	-0.0465122	0.0104788	0.183938	0.285618
DESM_HUMAN	-1.25e-05	-0.0804108	-0.0055699	-0.131907	0.0913319	0.259563	0.040739	-0.0737474
DESP_HUMAN	0.399654	0.039947	0.142809	-0.0702432	-0.105698	-0.276688	-0.438726	0.0711415
DEST_HUMAN	0.240023	0.303907	-0.328054	-0.166761	-0.119785	0.0428808	0.0645592	0.559196
DFFA_HUMAN	0.126667	-0.0363173	-0.0053133	0.0238022	-0.0153383	-0.187868	-0.0461837	0.0967314
DGCR6_HUMAN	-0.106751	-0.0296303	0.165295	0.337396	-0.0498126	-0.175394	0.1329	0.502241
DGKA_HUMAN	-0.663663	-0.0351776	0.0255794	0.0846017	0.137084	-0.175574	0.286857	-0.232866
DGKQ_HUMAN	0.0881191	-0.0655404	-0.111118	0.147177	0.0047723	-0.00382186	-0.332563	0.00382186
DGKZ_HUMAN	0.0488802	-0.0187854	-0.0620075	0.0558344	0.0845245	-0.0417674	-0.030451	-0.0130034
DGUOK_HUMAN	-0.0162046	0.0162046	-0.0721986	-0.0706676	0.234748	0.128624	0.23234	0.336507
DHB11_HUMAN	0.196163	0.113153	-0.176935	0.302238	-0.0651659	-0.10898	-0.0673621	0.0438845
DHB12_HUMAN	0.270505	-0.171594	-0.101447	0.102082	0.0663236	-0.117493	-0.0707026	0.227273
DHB4_HUMAN	-0.0250337	-0.0874128	0.0369667	0.169671	-0.053545	-0.108479	-0.0162773	-0.0204198
DHB8_HUMAN	0.226373	-0.169674	0.12318	0.196256	0.0112206	-0.0886003	-0.0273127	-0.0342425
DHC24_HUMAN	-0.0760295	-0.0138949	0.371349	-0.251409	0.0539659	0.222455	-0.0063904	-0.252333
DHE3_HUMAN	0.0560438	-0.0298406	0.212527	0.0212354	-0.0422017	-0.0877218	-0.078008	0.00881908
DHPR_HUMAN	0.0434546	-0.00588932	-0.0168482	-0.0300684	0.133903	-0.092739	0.173916	0.0211845
DHR11_HUMAN	0.139372	-0.157539	-0.00412763	0.106161	-0.0207627	-0.151251	-0.0675558	0.114842
DHRS1_HUMAN	0.210297	0.1216	-0.0320847	0.053816	-0.0961452	-0.051083	-0.185446	-0.0345957
DHRS4_HUMAN	0.554014	0.00717249	0.144829	0.420566	-0.543812	-0.313185	-0.32547	-0.38797
DHRS7_HUMAN	0.0260779	-0.331937	-0.0293672	-0.0107719	0.230629	0.112085	0.106765	-0.0326348
DHSO_HUMAN	-0.0262431	0.00241132	0.044113	0.171894	0.0872418	-0.227822	0.0126916	-0.0738533
DHTK1_HUMAN	0.0336249	-0.0365179	0.0498587	-0.0859572	-0.162749	0.0404113	-0.109431	-0.272646
DHX15_HUMAN	0.0533438	-0.00958072	-0.0651089	-0.0234477	0.0198622	-0.00906501	0.00558405	-0.0138805
DHX16_HUMAN	0.177291	0.0134046	0.00368703	0.18955	-0.226902	-0.15846	0.0209914	-0.20881
DHX29_HUMAN	-0.0404348	0.0763599	-0.0387982	-0.0937052	0.134524	0.0171605	-0.0546249	-0.0936986
DHX30_HUMAN	0.0792736	-0.119566	0.00597399	-0.0903249	-0.169609	-0.0965712	-0.128274	-0.111128
DHX36_HUMAN	0.0226622	-0.241415	-0.190554	-0.0470531	0.207305	-0.0350069	0.16147	-0.0196027
DHX9_HUMAN	0.0560847	0.00947033	-0.063439	-0.0227282	-0.0715552	-0.00397109	-0.0265015	0.16111
DHYS_HUMAN	-0.0333734	-0.00303126	0.0133151	0.0612332	0.394284	0.00782931	0.0389236	-0.00782931
DIA1_HUMAN	0.10909	0.135817	-0.0599645	0.0182622	-0.00254104	0.00254104	-0.100062	-0.0888623
DIAP1_HUMAN	0.0243464	-0.137938	0.0725289	0.0202037	-0.0909107	0.00536834	-0.0287081	-0.0183697
DIAP2_HUMAN	0.00266139	0.0246185	0.0272816	-0.000158038	-0.0650193	-0.153158	-0.108359	0.0943307
DIC_HUMAN	0.457247	-0.221479	0.268682	0.329097	-0.00141794	-0.00894232	-0.466435	-0.219844
DIDO1_HUMAN	0.0195954	0.119392	-0.134108	0.172236	0.0941283	-0.040243	-0.0536072	0.106197
DIP2A_HUMAN	0.0225369	0.0881356	-0.125944	-0.0763871	0.143888	-0.182949	-0.0133689	-0.0315699
DIP2B_HUMAN	-0.0133579	0.00877842	-0.0387819	-0.0945341	0.0541593	-0.0150011	-0.173501	0.015324
DIP2C_HUMAN	0.0194282	-0.0561877	0.0211822	-0.0123079	-0.0142767	-0.0281217	0.0586746	0.0262349
DJB11_HUMAN	0.0191006	-0.0338131	-0.0421835	0.181564	0.0726691	-0.0313864	-0.0790637	-0.0970424
DJB12_HUMAN	0.148089	-0.129036	0.132017	0.148457	-0.0424225	-0.197246	0.0238053	-0.124278
DJC10_HUMAN	-0.0315967	0.0362202	0.0229519	-0.00308411	-0.151848	0.00308411	0.0488268	0.472305
DJC11_HUMAN	0.0864935	-0.0286544	0.145959	-0.00630575	-0.133786	-0.0632474	0.0249474	-0.022786
DJC13_HUMAN	0.0804467	0.0092688	0.0198453	0.0209345	-0.099449	-0.0260663	-0.112001	0.0878222
DJC21_HUMAN	0.0503545	-0.0546819	-0.0912724	0.0939528	-0.186682	0.166836	-0.00766244	0.100944
DJC30_HUMAN	0.384085	0.00626485	0.200911	0.166931	-0.0607162	-0.190417	-0.145316	-0.0729909
DKC1_HUMAN	0.0571783	0.150629	-0.204441	-0.237875	-0.0485042	0.198396	-0.0785869	0.20326
DLDH_HUMAN	0.128302	-0.105265	0.0929624	0.0355811	-0.0204007	-0.141619	-0.0421305	-0.087645
DLG1_HUMAN	0.0697915	-0.000952786	-0.0679872	-0.137037	0.0952014	-0.193693	-0.216239	-0.00938659
DLGP4_HUMAN	0.0437639	-0.363219	-0.0563192	0.0891278	0.105961	0.0308617	-0.082138	0.0450167
DLRB1_HUMAN	0.0508628	-0.0410928	-0.0114078	-0.0212813	0.0243042	0.00222749	0.0243473	-0.26306
DMAC1_HUMAN	0.33391	-0.344657	0.0762438	0.55426	-0.0790715	0.00975647	-0.416701	0.0166844
DMAC2_HUMAN	0.0131027	-0.263326	0.141994	0.238152	-0.322929	-0.114644	0.081749	0.327854
DMD_HUMAN	-0.0307946	-0.0348529	-0.0200224	-0.106236	0.0952914	0.0794143	0.0844544	-0.0710757
DMPK_HUMAN	0.308657	-0.175809	-0.0777415	0.189238	-0.14148	0.203181	-0.226412	0.128165
DMXL1_HUMAN	0.289368	0.107476	-0.352482	-0.239225	-0.23936	-0.107476	0.328279	0.253696
DNJA1_HUMAN	0.019197	0.071424	-0.273666	0.0556527	-0.089568	-0.0248122	-0.0556527	-0.1189
DNJA2_HUMAN	-0.001465	-0.0566987	-0.0164982	-0.0353611	0.0170433	0.198132	-0.0432953	-0.0131659
DNJA3_HUMAN	0.236764	-0.0532064	0.175526	0.0695111	-0.00977233	-0.173974	-0.22093	-0.208687
DNJA4_HUMAN	0.102957	-0.106952	0.0160659	-0.0708843	-0.170745	0.196484	-0.12564	-0.000531558
DNJB1_HUMAN	0.110842	0.0727248	-0.130472	0.0902175	0.0681185	-0.0966021	-0.164255	-0.0680542
DNJB2_HUMAN	-0.0133285	-0.00504235	0.0123197	0.00504235	-0.122397	-0.0123197	-0.0475112	-0.0119566
DNJB4_HUMAN	-0.0867503	-0.028993	-0.00214007	-0.237214	0.0180683	0.260564	0.0213809	-0.124404
DNJB5_HUMAN	-0.0179925	0.0213544	-0.0546158	-0.139248	0.0649195	0.245271	-0.07791	-0.0512489
DNJB6_HUMAN	-0.0152106	0.00320879	0.0491622	-0.0591857	-0.344908	0.0165741	0.0509019	-0.022652
DNJC1_HUMAN	-0.535242	-0.153393	-0.175595	0.0661966	0.315034	-0.00179151	-0.0256447	0.297218
DNJC2_HUMAN	0.177878	-0.0168425	-0.17799	0.106416	-0.218489	0.0168425	-0.140117	0.386217
DNJC3_HUMAN	-0.028291	-0.133097	-0.0673257	-0.00882282	0.028291	0.0237475	0.0692917	0.0305022
DNJC5_HUMAN	0.107126	-0.0805002	-0.161168	-0.255393	0.285805	-0.0237671	-0.0405979	-0.147081
DNJC7_HUMAN	-0.0777812	-0.0015813	-0.0921961	0.0927699	-0.0162028	0.0934597	-0.119569	-0.028151
DNJC8_HUMAN	0.0926928	-0.129954	-0.142552	-0.00531634	0.0359945	0.0132703	-0.259583	0.158352
DNJC9_HUMAN	0.138641	0.0485388	-0.0394437	0.173801	-0.256224	-0.0194874	-0.17197	0.0194874
DNLI3_HUMAN	0.047107	0.145451	-0.00220804	-0.047092	0.032676	0.0198418	-0.188575	-0.0149132
DNM1L_HUMAN	0.0153305	-0.0622354	-0.00102813	0.0410053	-0.0225222	-0.0533991	0.0203211	0.00924221
DNM3A_HUMAN	0.150182	1.81399	-0.191633	0.0415013	-0.0138804	0.00530952	-0.052872	0.587454
DNMBP_HUMAN	-0.0395775	0.152005	0.0931964	0.00530656	-0.051807	-0.279022	-0.00530656	0.0395775
DNPEP_HUMAN	0.00678243	-0.0294916	0.00153427	0.0887374	0.0265162	-0.0158197	-0.157999	0.00218864
DNPH1_HUMAN	0.00417442	0.027715	0.00751759	0.00515072	0.00371713	-0.333121	0.125831	0.021249
DNS2A_HUMAN	0.214951	-0.260569	0.126727	-0.158252	0.00505881	-0.00505881	0.443859	0.139639
DNSL1_HUMAN	0.156389	0.0808496	-0.143974	-0.1146	0.171181	-0.312682	0.00266025	0.0405439
DOC11_HUMAN	-0.0354	0.292036	-0.0826348	0.203979	0.0354	-0.0745937	-0.0924755	-0.0379958
DOCK4_HUMAN	0.280371	0.00217485	-0.0760005	0.0930399	-0.0389147	-0.198522	-0.0342216	0.0782701
DOCK6_HUMAN	-0.0273362	-0.284972	-0.184281	0.0765162	-0.091326	0.104406	-0.0822978	0.218058
DOCK9_HUMAN	0.00432936	0.0256203	-0.181152	-0.00191638	-0.184554	0.33524	0.0761312	0.281829
DOHH_HUMAN	0.00067091	0.00364312	-0.22485	-0.146324	0.2511	0.0936758	-0.113325	0.122667
DOK2_HUMAN	-0.399797	0.555191	0.703416	-0.776526	4.00569	0.339353	-0.395838	-0.339353
DOK3_HUMAN	0.0484937	-0.0298077	-0.0065903	0.62161	0.0065903	-0.1659	-0.0300935	0.0858542
DOK7_HUMAN	0.144449	-0.137473	0.0181176	0.055958	0.0442117	-0.141655	0.0463482	-0.0046666
DOPD_HUMAN	0.212259	0.0626693	-0.0291538	0.0391518	0.108916	-0.68243	0.0540486	0.039965
DP13A_HUMAN	0.121265	-0.0121504	-0.0520598	0.00565088	0.15565	-0.0251417	-0.000429395	-0.0527666
DP13B_HUMAN	-0.0974129	0.305092	0.389785	0.274374	0.0484495	-0.104621	0.320538	-0.125853
DPA1_HUMAN	-0.0386466	0.0409498	0.105568	0.0459034	-0.099367	-0.147004	-0.175436	0.0573215
DPB1_HUMAN	-0.171475	0.0974132	-0.0248218	-0.00950049	-0.157221	0.116958	0.0436351	0.325509
DPH1_HUMAN	-0.0649272	-0.0843225	0.233967	0.0770743	0.157803	-0.288788	0.0149806	-0.143762
DPH2_HUMAN	0.12558	-0.0971505	0.205696	-0.0536328	-0.146561	0.186433	0.276528	-0.0558101
DPH5_HUMAN	0.26675	-0.0283087	0.144419	-0.018855	0.118214	-0.372825	-0.0679459	0.0941729
DPH6_HUMAN	0.211366	-0.458509	0.490778	0.112546	-0.134548	0.747587	-0.112546	-0.69322
DPOE1_HUMAN	0.37548	-0.0144979	0.0476545	0.0411505	-3.74e-05	3.74e-05	-0.130225	0.603843
DPOE4_HUMAN	0.13996	0.0483563	-0.129249	-0.217779	0.256904	-0.0270952	0.186801	0.0159056
DPOG1_HUMAN	-0.0176645	-0.435548	0.171548	-0.198752	0.236492	-0.397803	-0.00562444	0.211146
DPOG2_HUMAN	0.00971916	-0.00971916	0.125395	0.0771084	-0.33846	-0.138537	-0.420431	-0.0594272
DPOLB_HUMAN	-0.263418	-0.060557	0.063165	-0.0290453	-0.149543	-0.0875574	-0.135532	0.152132
DPOLM_HUMAN	0.121142	-0.040924	0.203739	-0.186273	0.040924	-0.140846	-0.356366	-0.0826585
DPP2_HUMAN	0.0777679	-0.291346	-0.179976	-0.150719	-0.0381235	-0.0376748	0.230533	0.274835
DPP3_HUMAN	0.000463847	-0.130198	0.0840284	0.129322	0.0724514	-0.0991442	0.016636	-0.00262188
DPP4_HUMAN	0.118587	0.569937	-0.384943	0.261954	-0.279209	-0.118587	0.225895	0.360737
DPP8_HUMAN	-0.00235817	-0.190828	-0.0146337	-0.0155963	0.160483	0.170304	-0.0224354	-0.0094056
DPP9_HUMAN	0.0553764	-0.0293614	-0.021792	0.0293614	0.050624	-0.0603441	0.0189313	-0.150954
DPTOR_HUMAN	0.0358812	-0.278515	0.0786928	-0.171246	0.00865656	-0.0315757	0.427008	-0.142144
DPYD_HUMAN	0.139795	-0.0539271	0.00147945	0.344865	-0.25119	0.371807	-0.243378	-0.00147945
DPYL2_HUMAN	0.191253	0.00813682	-0.117807	0.049315	-0.0302113	-0.0518154	0.0325283	0.238838
DPYL3_HUMAN	0.10825	-0.366979	-0.00557239	0.112472	-0.315452	0.405144	-0.0810984	0.159493
DPYL4_HUMAN	0.131354	-0.24937	-0.258489	-0.110757	0.152826	0.229224	-0.303291	0.178883
DQA2_HUMAN	0.100784	-0.265926	-0.107139	0.417468	0.665638	0.321215	-1.14588	0.840434
DRA_HUMAN	-0.0664291	-0.0183447	-0.146241	0.27363	-0.0120984	0.229928	-0.104534	0.389301
DREB_HUMAN	0.178381	0.149102	-0.0301856	0.128732	-0.202246	0.0344174	-0.00103103	0.0429617
DRG1_HUMAN	0.010955	-0.0393796	0.082512	-0.100576	0.0722124	-0.0149511	0.0265803	0.0170924
DRG2_HUMAN	0.154391	0.0135547	0.061288	0.022196	0.220647	-0.224526	-0.000463849	-0.160116
DRS7B_HUMAN	-0.0347818	0.0690973	-0.120322	-0.0106148	0.199996	0.332217	0.00339199	-0.0264172
DRS7C_HUMAN	-0.0940917	-0.00511112	-0.148182	0.024714	0.196335	0.115938	-0.0850619	-0.0591548
DS13A_HUMAN	-0.141089	-0.0675549	-0.0220991	-0.291175	0.028217	0.0407738	0.253073	0.0554119
DS13B_HUMAN	0.251954	-0.0130373	-0.133183	-0.13674	0.101367	-0.253116	0.0130373	0.0824726
DSCR3_HUMAN	0.242556	-0.0598782	0.104956	0.300045	-0.545055	-0.289177	-0.154802	-0.00117445
DSG1_HUMAN	0.0429583	-0.208975	0.316356	0.0770648	-0.0146496	-0.0834795	-0.133512	0.287537
DSRAD_HUMAN	0.0434216	0.213494	-0.0434216	0.0539784	-0.386228	0.289569	-0.317539	0.294101
DTBP1_HUMAN	0.0244004	-0.118542	0.0175229	-0.139873	-0.000589361	0.175185	-0.116641	0.000589361
DTD1_HUMAN	0.0322012	-0.0861436	0.00209158	0.147126	0.122228	-0.223887	-0.134644	-0.0752819
DTNA_HUMAN	-0.0399161	-0.024898	-0.017539	-0.00661892	0.0167379	0.0306891	0.210812	-0.0302116
DTWD2_HUMAN	-0.0279134	-0.0563415	0.0279134	0.355633	0.122414	-0.062996	0.251265	0.155627
DTX3L_HUMAN	-0.0902369	-0.232834	0.0506224	0.100592	0.0689859	-0.0612782	-0.132845	0.0350255
DUPD1_HUMAN	-0.0154152	0.0122975	-0.0856946	-0.184756	0.237576	0.0173443	-0.000636776	-0.0393891
DUS12_HUMAN	0.108613	0.0735721	-0.533567	0.304331	-0.558562	-0.0387881	0.0910966	0.0429966
DUS1L_HUMAN	0.173187	-0.0647835	0.0777462	0.15341	0.0235588	-0.0914143	-0.0904413	0.117989
DUS23_HUMAN	0.00347417	-0.0524145	0.215191	0.303814	-0.0542884	-0.193113	0.0587331	-0.0734131
DUS26_HUMAN	-0.0900961	-0.318972	0.225354	-0.0425001	0.0425001	0.106326	-0.0627922	0.125832
DUS27_HUMAN	-0.00525256	-0.0448725	-0.0396535	0.00683805	0.039933	0.152244	-0.0297154	-0.0414737
DUS28_HUMAN	-0.267147	-0.0612514	-0.159397	0.0209508	0.24553	0.0994412	0.192238	-0.0677686
DUS2L_HUMAN	-0.0400337	-0.0597667	0.058563	-0.0200704	0.559045	-0.121504	0.0200704	-0.298411
DUS3_HUMAN	0.0814967	0.0163807	-0.0274386	0.000191514	0.00482654	-0.115348	0.0314885	0.0794961
DUT_HUMAN	0.0387506	-0.0557235	0.0163295	0.179567	-0.161992	0.0349774	0.0856415	0.0224246
DVL1_HUMAN	0.294205	-0.0989255	-0.0266828	0.0315578	-0.213039	0.0728192	-0.190336	0.169818
DVL2_HUMAN	-0.174985	-0.0935955	0.241159	0.184454	-0.15408	-0.075591	-0.651788	0.2396
DX39B_HUMAN	-0.0154242	0.0911971	0.0220028	-0.0554194	-0.143665	-0.0534669	-0.0250613	0.112289
DYH11_HUMAN	-0.0351221	-0.417788	0.137834	0.158768	-0.407901	-0.393123	0.0148343	0.0722742
DYH7_HUMAN	-0.601007	0.371592	-0.0735129	-0.766042	0.648558	-0.236661	0.465826	-0.130307
DYHC1_HUMAN	0.00400127	-0.0235082	-0.0576892	-0.0165207	-0.018822	0.0437182	0.0194419	0.0483548
DYL1_HUMAN	0.0809868	0.151285	-0.198681	0.305491	-0.191985	-0.026628	-0.129271	0.353522
DYL2_HUMAN	-0.122307	-0.101875	0.0102028	0.0827905	-0.0567921	0.129653	0.134351	0.0765629
DYLT1_HUMAN	0.032545	-0.108984	-0.0638724	0.00562022	-0.00463306	0.0223136	0.0428525	0.115617
DYLT3_HUMAN	0.222132	-0.149383	0.0263487	0.178497	-0.218593	-0.290446	0.276428	0.068745
DYN1_HUMAN	0.06282	0.0273666	-0.316469	-0.0519375	-0.156125	0.0249097	0.370251	-0.0930876
DYN2_HUMAN	0.0187498	0.0311382	-0.042702	0.0806028	-0.0137169	-0.0399939	-0.0675739	0.0459729
DYN3_HUMAN	-0.218557	0.164795	0.0199207	-0.0437622	-0.0352176	-0.0350762	0.133904	-0.0199207
DYR1A_HUMAN	0.136095	-0.195346	0.102054	0.0324325	0.00653553	0.209267	-0.0573329	-0.157157
DYSF_HUMAN	-0.0642343	-0.0466805	-0.0491729	-0.0847024	0.103188	0.142725	0.0350484	0.0224153
DYST_HUMAN	-0.061721	0.00578604	0.0106919	-0.0420786	-0.0141143	0.140401	0.0175878	0.00789018
E2AK2_HUMAN	0.0224143	0.0175941	0.0690179	0.0283757	0.0437611	0.00782742	-0.0793179	0.0290994
E2AK4_HUMAN	0.058143	-0.303421	1.164	0.99319	-0.732857	-0.058143	-0.068953	0.697944
E41L1_HUMAN	0.266686	0.15898	-0.213034	-0.14797	-0.0477885	-0.000328401	-0.229557	0.0933824
E41L2_HUMAN	0.255642	0.141172	-0.0886638	-0.0150303	-0.062733	0.134769	-0.0514532	0.250166
E41L3_HUMAN	0.00630797	0.174343	-0.0508588	0.0206697	-0.00465349	0.187033	0.0426044	-0.220941
EAA1_HUMAN	0.130831	-0.0933326	0.00464024	0.0145522	0.0375984	-0.0475222	-0.190358	0.0378672
EBP2_HUMAN	-0.0988866	0.00457481	-0.147391	0.000499419	-0.0990625	0.0615073	0.0670888	0.0321211
ECD_HUMAN	0.0637	-0.291063	-0.0605679	-0.0391748	0.0889157	0.0162825	0.0815081	0.0391748
ECE1_HUMAN	-0.659211	0.0413398	-0.104307	0.332266	-0.179101	0.220989	-0.0430406	0.545129
ECH1_HUMAN	0.338112	-0.146642	0.345694	0.13122	-0.0589923	-0.197563	-0.159444	-0.0439715
ECHA_HUMAN	0.182483	-0.133937	0.2125	0.0185437	-0.0218122	-0.0858247	-0.0832695	-0.0296953
ECHB_HUMAN	0.1618	-0.0853421	0.173341	-0.0162198	-0.000285002	-0.0879475	-0.0475138	-0.0281755
ECHD1_HUMAN	0.384664	-0.0127185	0.155521	0.0342983	-0.0324398	-0.137159	-0.179682	0.116533
ECHD2_HUMAN	0.350909	0.0281537	0.131403	0.0469847	-0.191792	-0.0870454	-0.162415	0.0939453
ECHD3_HUMAN	0.0468781	-0.134767	0.390793	0.0197479	-0.102519	-0.27983	-0.0384026	-0.0655433
ECHM_HUMAN	0.157927	-0.0958243	0.155464	0.0549514	-0.0635833	-0.113459	0.0457835	-0.147579
ECHP_HUMAN	0.355483	-0.0383792	0.189591	0.339398	-0.192684	-0.177938	-0.0210229	-0.0122011
ECI1_HUMAN	0.17681	-0.0290102	0.148503	0.0826487	-0.0870255	-0.138691	-0.00818577	-0.163101
ECI2_HUMAN	0.393218	-0.176396	0.348753	0.138072	-0.254237	0.0241225	-0.182977	-0.0523776
ECM1_HUMAN	0.0114424	0.0945391	-0.0405137	0.648129	-0.347324	-0.0836933	-0.00195079	0.0260399
ECM29_HUMAN	0.00379761	-0.0379092	-0.0337011	-0.012947	0.0585746	0.0237031	0.0303088	-0.0468816
ECP_HUMAN	-0.0846529	-0.0445626	0.0665036	0.492211	-0.150079	-0.152776	-0.160793	0.329515
ECSIT_HUMAN	0.0850269	0.00145305	0.0291101	0.12905	-0.179093	-0.163901	-0.0509273	-0.0445927
EDC3_HUMAN	-0.117016	-0.0500081	0.120042	-0.368347	0.121329	-0.279636	-0.0468975	0.500919
EDC4_HUMAN	-0.00652782	0.00652782	-0.27358	0.0938479	0.0173527	-0.130148	0.0615402	0.0346924
EDF1_HUMAN	0.174502	-0.119829	-0.0565853	-0.204832	0.227006	0.408803	-0.0113578	0.0565853
EEA1_HUMAN	-0.0115665	-0.117552	-0.0146301	-0.00548197	0.0224194	0.166959	-0.0163445	-0.00538794
EEPD1_HUMAN	0.0608047	0.00649974	-0.0405106	-0.0184948	-0.0205292	-0.0619707	-0.1077	0.207935
EF1A1_HUMAN	0.288847	-0.147765	-0.409929	0.0665147	-0.0739147	0.144501	-0.316346	0.169892
EF1A2_HUMAN	-0.0317152	-0.0233214	-0.033052	-0.0391841	0.12133	0.021407	0.0870935	0.00198465
EF1B_HUMAN	0.00490993	0.0010851	-0.02382	-0.114534	0.0688809	-0.017577	-0.00520981	0.0403883
EF1D_HUMAN	0.0123276	-0.0606592	-0.0290055	0.181662	-0.0397724	-0.0514543	-0.005563	0.0189542
EF1G_HUMAN	0.0125022	-0.0482787	-0.0629684	0.159372	0.00575274	-0.0816669	0.0265242	-0.0180371
EF2_HUMAN	0.0329637	-0.0696586	-0.0114639	-0.0399071	0.0592466	-0.0155377	0.0550117	0.0512842
EF2K_HUMAN	0.0170989	0.0670663	0.0235298	-0.042223	0.128926	-0.127343	0.0401524	-0.275164
EFGM_HUMAN	0.0909733	0.0384938	0.0740086	-0.0150506	-0.0199782	-0.137256	-0.109159	-0.0425683
EFHD1_HUMAN	0.0725548	0.0422496	-0.129374	-0.0725548	0.28512	0.0233202	-0.0732756	0.566864
EFHD2_HUMAN	0.12683	-0.0116142	0.0303293	0.266368	-0.156187	-0.242686	-0.123791	0.0116142
EFL1_HUMAN	-0.0126152	-0.104578	0.0452024	-0.149569	0.198644	0.102387	0.0398872	0.146626
EFMT2_HUMAN	-0.661707	0.0780079	0.608085	-0.187325	-0.829307	0.291216	0.286006	0.363729
EFNB2_HUMAN	-0.0258695	0.172738	-0.0659523	-0.0761474	-0.0424341	0.0736962	-0.0925927	0.037021
EFR3A_HUMAN	0.0752701	-0.00323904	-0.00416622	0.00416622	-0.128868	-0.0820464	0.014932	-0.0321847
EFR3B_HUMAN	-0.262636	-0.0158719	0.0959676	-0.502826	0.096395	-0.0220017	-0.28043	0.0158719
EFTS_HUMAN	0.00555198	0.0611022	0.0486009	-0.053481	0.0142337	-0.259702	-0.00836205	-0.0142337
EFTU_HUMAN	0.150939	-0.158303	0.227593	0.0798427	-0.0290598	-0.137644	-0.0405237	-0.101609
EGFLA_HUMAN	0.49672	-0.0353159	-0.0936132	0.156	-0.139611	-0.183535	-0.0444497	-0.0136954
EGFR_HUMAN	0.00910296	0.275858	-0.0299479	-0.0116544	-0.0146697	-0.0044077	0.0859597	0.0898578
EGLN_HUMAN	0.0823482	-0.0118343	-0.136159	-0.0405252	-0.0517205	-0.0333791	0.0622474	0.100905
EGLN1_HUMAN	0.139714	-0.176804	0.102172	-0.000441446	0.0158808	-0.0537874	-0.0438524	-0.117532
EH1L1_HUMAN	-0.0178809	-0.0837406	0.00799861	-0.0174622	-0.0234892	0.00641514	0.00468399	0.0701219
EHD1_HUMAN	0.099663	0.00442165	-0.0217188	0.0534783	0.0393361	-0.0162405	-0.116116	0.0156766
EHD2_HUMAN	0.212729	0.0676527	-0.0548507	-0.0617627	-0.126455	0.019694	-0.153581	0.231478
EHD3_HUMAN	0.0770654	0.0332547	-0.176862	0.758578	-0.191473	-0.240544	-0.0192463	0.264479
EHD4_HUMAN	0.0612841	-0.0058953	-0.0653934	-0.00479874	-0.0524249	0.110674	-0.254023	0.109415
EI24_HUMAN	0.0213267	0.0938856	-0.24637	-0.185453	0.204125	0.0625912	-0.16749	-0.0743562
EI2BA_HUMAN	0.0563619	-0.0901488	-0.184483	-0.0535047	0.102635	-0.0462748	-0.0431507	0.0721528
EI2BB_HUMAN	-0.0408946	-0.0521306	0.0924801	0.113231	0.0783255	-0.0217398	-0.0612759	0.0613614
EI2BD_HUMAN	-0.00912917	0.186037	-0.0671225	-0.016148	0.146906	0.0207713	-0.275584	0.0300853
EI2BE_HUMAN	0.157935	-0.0182029	-0.00633523	-0.0496012	-0.028285	0.0101525	-0.00555208	-0.0587066
EI2BG_HUMAN	-0.109194	-0.11376	-0.0474526	-0.0186804	0.117813	0.063163	-0.0114566	-0.0273378
EIF1_HUMAN	-0.0327358	0.102474	0.011105	0.0449506	-0.018398	-0.0452182	0.0729416	-0.0173311
EIF1A_HUMAN	0.261543	0.0158765	-0.243879	0.0397047	-0.0158765	-0.129781	-0.246627	0.0880781
EIF1B_HUMAN	0.00224366	-0.0574254	-0.0217541	0.00229288	-0.135098	-0.0738824	-0.0482542	0.0438441
EIF2A_HUMAN	-0.00660529	-0.323634	0.0102575	-0.0236013	0.113427	0.107454	0.0236013	-0.11097
EIF2D_HUMAN	0.100152	0.00128927	-0.041127	0.0487122	-0.0147894	0.0134214	0.0782867	-0.0134214
EIF3A_HUMAN	0.0605192	-0.0293932	-0.0557633	-0.0181342	0.0224896	0.0336184	-0.00251351	-0.0230472
EIF3B_HUMAN	0.0322341	-0.0966248	-0.0400791	-0.0341963	0.0141094	0.0803961	0.0593678	-0.0251851
EIF3C_HUMAN	-0.00441793	-0.0695235	-0.0992121	0.0301097	0.08148	0.0177477	-0.08148	0.00999238
EIF3D_HUMAN	0.00538938	-0.122166	0.00275427	0.00178851	0.0124952	-0.00209045	0.0132987	-0.00710722
EIF3E_HUMAN	0.0144527	-0.046543	-0.0809608	-0.012047	0.0716765	-0.00931335	-0.0206106	0.0315733
EIF3F_HUMAN	0.101015	-0.150181	0.0613505	0.0532436	-0.0428117	0.091796	-0.0202513	-0.0086985
EIF3G_HUMAN	-0.0249721	-0.0117619	-0.037461	-0.00517291	0.0729097	0.14826	0.00823305	-0.138078
EIF3H_HUMAN	0.0321299	0.0201401	-0.0665425	-0.041749	0.111844	-0.0854961	0.0291018	-0.0122375
EIF3I_HUMAN	-0.0856867	-0.0488158	0.0307627	-0.0304529	-0.0037351	0.083897	-0.0202173	-0.00581979
EIF3J_HUMAN	0.0224697	-0.163782	-0.109998	-0.136619	0.0750982	0.149872	0.0961926	0.0218535
EIF3K_HUMAN	0.146529	-0.0345249	0.00832798	0.0491225	0.0873577	-0.0311233	-0.117252	0.0176854
EIF3L_HUMAN	0.0274694	-0.105172	-0.0737545	-0.0208743	0.0696427	0.0273251	0.0196121	-0.0150187
EIF3M_HUMAN	0.161092	-0.120143	-0.226035	0.0873929	0.120397	0.0197478	0.0564353	0.0182944
EIPR1_HUMAN	-0.316666	0.198041	0.309653	0.0320372	-0.3974	-0.0320372	0.611427	-0.677953
ELAV1_HUMAN	-0.0129178	0.07692	0.00797856	-0.122486	0.0949851	0.0904132	0.113672	-0.0090543
ELMD2_HUMAN	0.334835	0.344291	-0.126361	-0.242847	0.358165	-0.12826	0.0348015	0.129273
ELMO1_HUMAN	-0.000244378	-0.100191	0.0465525	0.197945	0.13677	-0.399025	0.000244378	-0.12032
ELMO2_HUMAN	0.0720475	0.0500756	0.0826576	0.108581	0.0760769	-0.2739	-0.189367	-0.102915
ELN_HUMAN	0.399693	0.461675	-0.673673	-0.776067	0.343548	-0.265483	0.265483	0.26659
ELNE_HUMAN	0.0313665	0.0234553	0.0460388	0.171584	-0.119162	-0.096511	-0.18235	0.0449739
ELOA1_HUMAN	0.0299721	0.486737	-0.300479	0.193886	0.36083	-0.201378	-0.0983571	-0.33983
ELOB_HUMAN	0.0177451	-0.00744699	-0.000373785	-0.117665	-0.0282684	0.132859	0.143775	-0.0681666
ELOC_HUMAN	-0.0451697	0.0230035	0.00377667	-0.00353251	0.0551898	0.0481946	0.0108674	-0.0874395
ELP1_HUMAN	0.189185	-0.130807	0.0814354	0.0116067	0.0240504	-0.00479263	0.159126	-0.00992587
ELP2_HUMAN	0.289749	-0.0296311	-0.498629	-0.10993	0.0806369	-0.498768	0.0296311	0.365548
ELP3_HUMAN	-0.218107	0.731006	0.247232	0.0389786	-0.0413332	-1.15636	-0.549794	0.792178
ELYS_HUMAN	-0.139878	0.0661915	-0.0831935	-0.0508493	-0.0252991	0.17235	0.0252991	0.201403
EM55_HUMAN	0.00259943	0.112017	0.0871782	0.415153	-0.26629	-0.159448	-0.153135	-0.0608038
EMAL1_HUMAN	-0.13163	0.0354022	-0.0306981	-0.040123	0.00985517	0.0994794	0.0188029	0.075162
EMAL2_HUMAN	0.197382	-0.198727	-0.0465132	0.213758	-0.0136909	0.107091	-0.0903266	0.0502373
EMAL3_HUMAN	0.00491657	0.00966488	-0.149585	-0.167362	0.325421	-0.442198	-0.00491657	0.191987
EMAL4_HUMAN	0.157107	-0.242164	-0.105826	0.130063	0.0770871	-0.0382376	-0.0668232	0.174159
EMC1_HUMAN	-0.0445592	-0.0106544	-0.0594783	-0.08875	0.0539197	0.00625751	0.04897	0.0278389
EMC10_HUMAN	0.012098	-0.186201	0.168133	0.0116369	-0.140182	0.121928	0.0536785	0.0694417
EMC2_HUMAN	-0.105801	-0.0233507	0.0173137	-0.162278	-0.00688718	-0.00550656	0.0929025	0.0338366
EMC3_HUMAN	-0.027372	-0.0491444	0.0228051	0.0289611	0.0143159	0.0696425	0.028441	0.0425637
EMC4_HUMAN	-0.0170981	-0.128007	0.118172	0.0170981	-0.0519853	0.0410519	0.00353807	-0.107853
EMC7_HUMAN	0.572801	-0.0112302	-0.0199433	0.0879904	-0.454857	0.0627404	0.201714	0.0199433
EMC8_HUMAN	-0.00957878	-0.0251116	0.0615621	-0.0666005	-0.221947	0.0672564	0.0724676	0.00957878
EMC9_HUMAN	-0.00917884	-0.121078	-0.0132222	-0.0422587	0.00917884	-0.0191807	0.0770653	0.0723601
EMD_HUMAN	0.00822939	0.006152	-0.102346	0.022061	-0.006152	0.0338408	-0.00205899	0.0204187
EMIL1_HUMAN	0.102656	0.202024	-0.383184	0.226423	-0.261435	0.00801504	-0.0234015	0.0130005
EMIL2_HUMAN	-0.0724329	0.342705	-0.195178	-0.0813847	-0.0352563	0.230503	-0.110632	0.19155
EMRE_HUMAN	-0.0359341	-0.125885	-0.17039	0.0839094	0.0638357	0.0359341	0.176961	-0.043361
ENAH_HUMAN	0.328875	-0.00560479	-0.0442056	-0.0881447	-0.523006	-0.0052678	-0.195677	0.0528054
ENDD1_HUMAN	-0.0988718	-0.0426064	8.91e-06	-0.0259789	0.0546783	0.0072273	0.101927	-0.00947801
ENOA_HUMAN	-0.0468596	-0.101765	-0.00486783	-0.00543712	0.0561835	0.0140385	0.0113258	0.00486425
ENOB_HUMAN	-0.295558	0.197838	0.0592396	-0.127093	0.269504	-0.108649	0.252755	-0.216234
ENOF1_HUMAN	-0.0651216	-0.0554976	0.152434	-0.111688	1.34e-05	-0.194074	0.111545	0.0740751
ENOG_HUMAN	0.0727205	0.00420396	-0.0873321	-0.0201074	0.100143	-0.0613633	0.0197555	0.0208634
ENOPH_HUMAN	0.0591679	-0.0506668	0.0134638	0.0325606	0.204346	-0.154443	0.0202972	0.0207841
ENPL_HUMAN	0.0788634	0.0018146	-0.134519	0.13788	-0.0765245	-0.0035444	-0.042513	0.0742407
ENPP1_HUMAN	0.0343598	-0.0561775	0.0142982	0.455227	-0.599961	-0.0161242	-0.138319	0.242252
ENSA_HUMAN	-0.0597452	-0.0542842	0.0151866	0.0279933	-0.0603186	-0.000844537	0.0254077	0.0139393
ENTP1_HUMAN	0.139653	0.146883	-0.274557	-0.207753	-0.27279	0.156334	0.0191865	0.11774
ENTP2_HUMAN	-0.688517	0.18745	0.299735	-0.110479	-0.0815207	0.102689	0.236792	-0.49733
ENTP3_HUMAN	0.99512	0.830208	-0.0378818	0.0378818	-0.52922	0.424365	-0.148382	0.151691
ENTP5_HUMAN	-0.0462916	-0.308085	0.0656725	0.124496	-0.589792	-0.0159581	0.216733	0.0151544
EOGT_HUMAN	-0.0431353	-0.0823281	0.266501	0.0300277	0.218519	-0.32352	-0.245552	-0.0300277
EP15R_HUMAN	0.0138796	-0.124163	0.189811	0.0773539	-0.0622899	0.000218966	-0.0357259	-0.0488475
EPB42_HUMAN	0.0699079	0.262918	0.0751157	0.817977	-0.334513	-0.302707	-0.314171	-0.0250206
EPCR_HUMAN	0.0826416	-0.02118	-0.20276	-0.0463222	0.285032	0.161871	0.0463222	0.00365422
EPDR1_HUMAN	0.269721	-0.110478	0.167148	0.0426626	0.313858	-0.227839	-0.158048	-0.129097
EPG5_HUMAN	0.365243	0.0531528	-0.293623	0.144601	-0.0453136	-0.373444	-0.105896	0.167056
EPM2A_HUMAN	0.00161924	0.02607	0.0107684	-0.0759658	0.147579	-0.0751994	0.127714	-0.12909
EPMIP_HUMAN	0.146414	-0.225251	0.0503547	-0.0461858	-0.0525624	-0.0765329	0.0909748	-0.12826
EPN1_HUMAN	-0.0023326	-0.0659846	0.056884	-0.00343214	0.029586	-0.0180287	-0.104879	0.0180287
EPN2_HUMAN	0.250349	0.0755108	-0.25445	-0.00551047	0.117179	-0.116125	0.00551047	0.270049
EPN4_HUMAN	-0.0845696	0.0164534	-0.0859521	0.117201	-0.0311828	0.150182	0.0512186	-0.143586
EPS15_HUMAN	0.0148297	0.0126096	0.00850908	0.130962	-0.0205495	-0.0211821	-0.0107274	0.0216533
EPS8_HUMAN	-0.0999364	0.296255	-0.394533	-0.0419967	0.102784	-0.244081	0.147283	0.413614
EPT1_HUMAN	-0.0291572	-0.16195	0.0108475	0.301492	-0.00836677	0.120022	0.00836677	-0.217478
ERAP1_HUMAN	-0.255065	0.132597	-0.336869	-0.052719	0.196101	0.22145	-0.340159	0.249292
ERAP2_HUMAN	0.30789	-0.106652	-0.664564	-0.0414105	0.391955	-0.115227	0.411807	0.0414105
ERBIN_HUMAN	0.207065	-0.111818	-0.0834951	0.285898	-0.144896	-0.0503097	-0.212531	-0.00969927
ERCC2_HUMAN	0.225082	-0.482819	-0.0946448	0.0103707	-0.235532	0.05193	-0.904845	0.324504
ERF1_HUMAN	0.166931	-0.109547	-0.105725	0.162475	0.0385954	-0.109236	-0.0194875	0.0420084
ERF3A_HUMAN	-0.107134	-0.171076	0.0492479	0.0277677	-0.081346	0.0441716	0.0754364	0.0868324
ERF3B_HUMAN	0.114774	-0.0677236	-0.224957	0.140001	0.117208	-0.0743177	-0.0386458	0.218818
ERG24_HUMAN	0.101484	-0.142098	-0.0307774	-0.258789	0.0926608	0.0339849	-0.079257	0.0307774
ERG7_HUMAN	0.205322	-0.137683	0.0266896	0.1482	-0.0318624	-0.0281091	-0.126214	-0.117176
ERGI1_HUMAN	0.0480369	-0.102233	-0.0205737	-0.0618675	-0.0202211	-0.0036646	0.0438924	-0.027227
ERGI3_HUMAN	-0.280405	-0.0162545	0.0646286	-0.153362	-0.0245785	0.0162545	0.244623	0.222697
ERH_HUMAN	-0.102468	-0.0464522	-0.0525967	-0.00956304	0.00548228	0.0942557	0.0880774	-0.107651
ERI3_HUMAN	0.0385357	0.00950862	-0.121696	-0.0399187	0.0181553	0.00172293	0.0267793	-0.0368
ERLEC_HUMAN	0.108998	0.00410209	-0.21421	0.0404072	-0.0387375	-0.0404072	0.0387375	0.193301
ERLN1_HUMAN	-0.249998	0.124555	-0.0880456	-0.131211	0.138941	0.0437318	-0.0716647	0.117649
ERLN2_HUMAN	-0.02441	0.000996098	0.00604828	-0.00215502	-0.0231318	-0.0622671	-0.000129545	-0.057131
ERMAP_HUMAN	0.150283	0.250319	-0.00394322	0.75317	-0.0736672	-0.0912309	-0.130898	0.0672329
ERMP1_HUMAN	0.211614	0.00616814	-0.0245921	0.142171	0.0848485	-0.303132	-0.207278	0.283111
ERO1A_HUMAN	0.0475943	-0.0549587	0.00439609	0.00770161	-0.173119	0.0604238	0.0122808	0.0685471
ERO1B_HUMAN	-0.325598	0.604861	0.151435	-0.0568702	-0.0512893	0.0512893	1.19353	0.255705
ERP29_HUMAN	-0.00649185	0.0125366	-0.075143	-0.0245487	0.00782564	0.0921907	0.000514842	0.00116006
ERP44_HUMAN	-0.00470551	0.0260466	-0.0458979	0.184919	-0.000846383	-0.0725019	-0.0259587	-0.0241709
ES1_HUMAN	0.344168	-0.060516	0.272476	0.0662624	-0.0146022	-0.206645	-0.104278	-0.120971
ESAM_HUMAN	0.338513	-0.0382386	-0.0975954	0.369339	-0.272515	-0.0860934	-0.0835679	0.115141
EST1_HUMAN	-0.05532	0.287394	-0.0308042	-0.0642997	-0.0484117	0.327824	-0.322119	0.00494934
EST2_HUMAN	0.00978308	-0.0967713	0.0210505	0.0575985	0.0199013	0.0659313	0.00598822	-0.0345706
ESTD_HUMAN	0.00216665	-0.0172861	-0.0246883	0.0574785	0.0864538	-0.0904124	0.0482604	0.0591459
ESYT1_HUMAN	0.0237451	0.0045294	-0.115254	0.0516836	-0.018708	0.0168065	-0.00188906	-0.0226959
ESYT2_HUMAN	0.00961182	-0.0175677	-0.167617	0.0311423	-0.0322852	0.105937	-0.0103293	-0.00842833
ETFA_HUMAN	0.456615	-0.0576996	0.402081	0.171621	-0.129428	-0.130594	-0.184978	-0.0744875
ETFB_HUMAN	0.505189	-0.104174	0.63688	0.27961	-0.204258	-0.0488503	-0.290372	-0.140284
ETFD_HUMAN	0.216236	-0.127257	0.187081	0.0686313	-0.0211039	-0.190173	-0.160353	-0.202797
ETFR1_HUMAN	-0.00650085	-0.384276	0.37826	-0.314139	-0.605653	0.0328354	0.00650085	-0.49718
ETHE1_HUMAN	0.179731	0.0102468	0.103371	-0.119642	-0.012141	-0.088944	-0.0163825	0.0118313
EVI5L_HUMAN	0.0876493	0.224144	-0.0160144	-0.236356	-0.573696	0.0160144	0.624556	-0.121138
EWS_HUMAN	-0.0252226	0.118021	-0.0504044	0.0504044	-0.1606	0.299096	0.167591	0.214741
EXC6B_HUMAN	-0.0139626	0.0263043	0.0573534	0.0110605	-0.112124	-0.0169789	-0.31682	0.141975
EXD2_HUMAN	-0.610082	0.233207	-0.0523989	-0.156687	-0.276526	0.121918	0.0835535	0.182401
EXOC1_HUMAN	0.120664	0.00214671	-0.272409	0.0596324	0.0383031	0.113579	-0.195033	0.153174
EXOC2_HUMAN	0.137072	-0.133903	-0.302748	0.00998221	0.100326	0.0550474	-0.0230043	0.0529056
EXOC3_HUMAN	-0.0602967	0.0367493	0.0436916	-0.0206863	0.0457493	0.0777015	-0.0454967	0.243582
EXOC4_HUMAN	0.503529	-0.109796	0.114599	-0.0083471	-0.122019	-0.0329574	-0.171027	0.00423565
EXOC5_HUMAN	0.149757	0.026611	0.0971173	0.00316541	0.0237686	-0.0301708	-0.143812	-0.117605
EXOC6_HUMAN	0.103276	-0.17877	0.0215981	0.19568	-0.0946376	-0.0215981	-0.214286	0.147132
EXOC7_HUMAN	0.0727511	-0.150582	-0.0769543	0.26554	0.108424	-0.0552602	-0.198482	0.118914
EXOC8_HUMAN	0.125783	-0.00932496	-0.186554	0.146472	-0.0115665	-0.0596338	0.0377003	0.155185
EXOG_HUMAN	0.0192774	-0.071484	0.169041	0.104683	-0.00725936	-0.176027	0.0319693	-0.282157
EXOS1_HUMAN	0.344173	-0.117944	-0.0796298	-0.014947	0.383769	-0.0191886	-0.0263091	0.014947
EXOS2_HUMAN	0.183709	0.0846104	-0.0926693	-0.125288	0.0456307	-0.0602972	-0.166954	-0.0245883
EXOS3_HUMAN	0.0211991	-0.113804	0.280191	0.2778	-0.522332	0.0832523	-0.0211991	-1.16116
EXOS5_HUMAN	0.0219847	-0.0626156	0.0235061	0.0203028	-0.183047	-0.288608	-0.448214	0.0351912
EXOS6_HUMAN	0.127184	0.396874	0.168559	0.124006	-0.0133039	0.128777	-0.710875	0.0205713
EXOS7_HUMAN	0.0546066	0.0352778	-0.20448	-0.185372	-0.085757	-0.022179	-0.269214	0.405169
EXOS8_HUMAN	-0.0837368	0.494878	0.037192	-0.361001	-0.222434	0.521657	-0.443976	0.16065
EXT2_HUMAN	-0.13855	0.306942	0.00352708	-0.00352708	0.6104	0.11232	-0.0529326	0.464227
EYA4_HUMAN	0.0739341	0.0203061	-0.0613109	-0.0462408	0.359811	-0.273572	0.0620347	-0.121145
EZRI_HUMAN	0.054069	-0.252644	0.0140028	0.332036	0.110849	-0.218742	-0.137773	0.151627
F1142_HUMAN	0.036128	-0.0888316	0.0232214	-0.000886696	-0.0110832	-0.165334	-0.0858051	0.0582913
F118B_HUMAN	-0.0342112	0.0334237	-0.0665947	-0.0750245	0.154696	0.0062841	0.0579994	-0.0242245
F120A_HUMAN	0.0233745	-0.0955908	0.0155397	-0.166192	-0.0469758	0.0906507	0.0469758	0.0333795
F120B_HUMAN	-0.00258419	-0.246172	-0.128085	-0.0096225	0.0776737	0.192575	0.000609889	0.268849
F120C_HUMAN	-0.121505	0.0716398	0.160317	-0.225273	-0.266135	0.0116833	0.386871	0.229478
F136A_HUMAN	0.0602951	-0.000890154	0.249111	0.0890653	-0.343697	-0.221483	-0.300136	-0.069365
F13A_HUMAN	0.164617	0.154693	-0.146899	0.88385	-0.245096	-0.135933	-0.056016	-0.012669
F13B_HUMAN	0.184921	0.0716685	-0.252421	0.558592	-0.286689	-0.0872162	-0.00688194	0.025011
F162A_HUMAN	0.495062	-0.0518129	0.0653264	0.222289	0.0464224	-0.101507	-0.0862322	-0.0278466
F16A1_HUMAN	0.211848	-0.00025759	-0.0295548	0.00949491	0.0731823	-0.0915688	-0.0769731	-0.00416413
F16A2_HUMAN	0.171344	-0.537592	0.263365	-0.0778875	-0.00662629	0.140442	0.00662629	-0.437021
F16B1_HUMAN	0.0139334	-0.145023	0.193364	-0.0789488	-0.010721	0.115907	-0.102219	0.178534
F16B2_HUMAN	-0.130757	0.383736	0.0345786	-0.0579132	-0.0683199	-0.109017	0.0975518	-0.0345786
F16P2_HUMAN	-0.0489255	0.539285	0.419591	-0.206536	0.820336	-0.311803	-0.0644969	-0.105802
F177A_HUMAN	-0.139157	-0.0152959	0.0264969	0.242358	-0.355649	0.176554	-0.118264	-0.11791
F185A_HUMAN	0.0710771	0.185797	0.127735	0.0149697	-0.0681109	-0.258203	0.306461	-0.000575692
F192A_HUMAN	0.436151	0.0920056	0.017147	0.388461	-0.017147	0.187646	-0.192939	-0.204641
F210A_HUMAN	0.280047	0.0309126	0.618027	0.310899	0.00440236	-0.508242	-0.102854	-0.217501
F213A_HUMAN	0.22724	-0.105024	0.143744	-0.0390882	-0.0484439	0.0225216	-0.33053	0.0220691
F234A_HUMAN	0.121748	-0.175396	-0.0175044	0.0946548	-0.0110457	-0.250652	-0.0459959	-0.0284759
F241B_HUMAN	0.100267	-0.00661364	-0.00367621	-0.00242535	0.0196329	0.0084183	-0.121596	0.0678251
F261_HUMAN	-0.360162	0.184931	0.12865	-0.00620559	0.141388	-0.153521	0.317457	-0.144145
F262_HUMAN	0.410055	-0.124997	-0.0107003	0.262785	-0.1248	-0.00242574	-0.255997	-0.0130795
FA10_HUMAN	0.358387	0.228321	-0.355909	0.307515	-0.140668	-0.361549	-0.334556	0.510134
FA11_HUMAN	0.158951	0.552365	-0.367233	-0.109449	-0.0531574	0.437389	0.0531574	0.138704
FA12_HUMAN	0.238862	0.131041	-0.0311021	-0.00220927	0.00270655	-0.571175	0.174983	0.451946
FA45A_HUMAN	0.315593	-0.195484	0.0156245	0.12136	0.426007	-0.0451857	0.112122	-0.0156245
FA49B_HUMAN	0.0226845	0.0100787	0.0451257	0.0120919	0.179671	-0.0935965	-0.0270933	-0.0251146
FA5_HUMAN	0.303753	-0.0439327	-0.0956281	0.839367	-0.250917	-0.0229192	-0.112313	0.090881
FA50A_HUMAN	0.582549	-1.39864	0.2342	0.497063	-0.733916	-0.161371	0.146693	0.115011
FA9_HUMAN	0.334103	0.371371	0.0568156	-0.0399958	-0.399011	-0.193097	0.373443	0.639038
FA98A_HUMAN	0.076168	-0.0847961	-0.0409964	-0.0846887	0.137237	-0.00575512	0.112013	-0.0205426
FA98B_HUMAN	-0.012362	-0.0505057	-0.1685	0.0475748	0.131885	0.0862598	0.0707081	0.0505057
FAAA_HUMAN	0.0618269	-0.0785467	0.121487	-0.0136241	0.0597311	-0.512981	-0.0186651	0.0697606
FAAH1_HUMAN	-0.00156574	0.0290827	-0.130487	-0.214192	0.344206	-0.208553	0.0673613	-0.12859
FABD_HUMAN	0.150481	-0.0459789	0.310617	-0.0468613	-0.156455	-0.11119	-0.0345428	0.00279907
FABP4_HUMAN	0.604679	-0.0231412	0.316372	-0.00950137	0.310021	-0.12868	-0.0509384	-0.0827839
FABP5_HUMAN	0.330398	-0.142304	0.263062	0.0181096	-0.0708641	-0.0552082	0.0332181	0.0198939
FABPH_HUMAN	0.821162	-0.214015	0.406226	0.494093	0.0254456	-0.332981	-0.0255936	0.0236794
FACE1_HUMAN	0.057845	-0.0752857	-0.0242057	0.125103	-0.381449	0.264332	-0.121339	-0.339421
FAD1_HUMAN	0.194746	-0.164852	0.148937	0.0340196	-0.100355	-0.0502267	-0.0921169	0.0310329
FADD_HUMAN	-0.054492	0.119657	-0.0509127	0.0139031	0.0261	-0.23574	0.0292647	0.0712471
FAF1_HUMAN	0.134789	-0.0599025	0.0111266	0.100942	-0.118911	-0.209795	-0.038808	0.107794
FAF2_HUMAN	-0.0882414	-0.0160492	0.00592766	0.00423727	0.072838	-0.11072	-0.0219635	0.114097
FAH2A_HUMAN	-0.0761848	-0.0680974	0.136941	6.73e-05	6.99e-05	-0.103373	0.061983	0.0232734
FAHD1_HUMAN	0.0905404	-0.0432506	0.101232	-0.11419	-0.0177878	-0.0538318	-0.0357291	0.0177143
FAK1_HUMAN	0.0241505	0.0296344	-0.163864	0.124316	0.285302	-0.120566	-0.0642492	0.0687698
FAKD1_HUMAN	0.0905392	-0.0814721	0.0379465	0.138125	-0.168744	-0.379048	-0.0644368	-0.0334193
FAKD2_HUMAN	0.0438204	-0.0507384	0.0316829	0.221452	-0.183756	-0.0581053	-0.218374	-0.0277989
FAKD3_HUMAN	0.133322	0.207309	0.254828	-0.260698	-0.0479569	-0.173421	-1.28822	0.0479569
FAKD4_HUMAN	0.0169648	0.0261758	0.0347288	0.148837	-0.0321135	-0.182548	0.0321135	0.0709663
FAKD5_HUMAN	0.224409	0.16657	0.104555	-0.104555	-0.696809	-0.416621	-0.124671	-0.253992
FAM3C_HUMAN	0.472046	0.882657	0.278604	0.274804	-0.550102	-0.640286	-1.35024	-0.576989
FARP1_HUMAN	-0.120161	0.264127	-0.124444	-0.105799	0.0944821	-0.000920541	0.0913326	0.213083
FAS_HUMAN	0.595571	0.165827	0.0117344	0.025513	-0.0633121	-0.130556	-0.468726	-0.0316488
FASTK_HUMAN	0.124962	-0.0173413	0.0173413	0.174889	0.312173	-0.404296	-0.232336	0.0997272
FBLN1_HUMAN	-0.0812093	0.338902	-0.23466	0.592015	-0.249216	-0.0227845	0.00103505	0.110193
FBLN2_HUMAN	0.0163741	0.176371	-0.407023	-0.0646293	-0.0145584	0.346676	0.10822	0.39296
FBLN3_HUMAN	-0.167085	0.263706	-0.457735	0.500785	-0.211702	0.167085	0.0996144	0.221239
FBLN4_HUMAN	0.00390895	-0.37495	-0.00517983	0.0267468	-1.23434	0.0906867	0.186456	-0.13141
FBLN5_HUMAN	-0.63692	0.159455	-0.152786	0.062205	-0.595427	0.301077	-0.199698	-0.0570845
FBN1_HUMAN	-0.00385386	0.310204	-0.278546	-0.0137105	-0.155805	0.376146	0.297891	0.111561
FBP1L_HUMAN	-0.017442	0.103504	-0.100694	0.275926	-0.143871	0.0958526	-0.117775	-0.0909343
FBRL_HUMAN	-0.0660605	-0.0707491	0.0529523	-0.076385	-0.0745465	0.266866	0.174112	-0.0830765
FBX22_HUMAN	0.246962	-0.0578172	0.0792483	-0.023091	0.0860633	-0.20641	-0.0265512	0.260583
FBX3_HUMAN	-0.14354	-0.0960309	-0.0456967	0.0254275	0.276005	-0.125418	0.127299	-0.00626548
FBX30_HUMAN	0.006322	-0.108349	0.268409	0.0996067	-0.61989	-0.067692	0.00268785	0.108616
FBX32_HUMAN	0.116999	-0.081922	-0.0875506	-0.292219	0.408994	-0.0824473	0.16839	-0.282703
FBX40_HUMAN	-0.0381643	-0.18474	0.0283005	-0.0648276	-0.0666867	0.369322	-0.163335	0.144911
FBX41_HUMAN	-0.0330334	0.697067	0.0330334	-0.539486	0.223861	-0.160318	-0.905357	0.38531
FBX6_HUMAN	-0.0670589	0.0429322	0.155424	-0.0841514	0.428239	-0.0150463	-0.160305	0.000674967
FBX7_HUMAN	0.217206	0.0158769	0.253978	0.511292	-0.0535528	-0.473462	-0.390858	-0.0489572
FBXL8_HUMAN	0.249642	0.474702	-0.0989828	-0.125469	0.435873	-0.158021	-0.229726	-0.0367905
FBXW5_HUMAN	-0.340286	-0.306507	-0.197844	-0.0464206	0.0397452	-0.100604	-0.141322	0.259007
FCG2A_HUMAN	-0.0569247	0.583214	-1.29283	0.865119	0.387906	-0.707042	0.743464	0.0569247
FCG3A_HUMAN	-0.00376214	0.00376214	0.0094263	0.380801	-0.280696	-0.179556	-0.0399791	0.504831
FCG3B_HUMAN	0.00061699	-0.174758	-0.247149	-0.00061699	-0.139122	0.109493	0.206468	0.140966
FCGRN_HUMAN	-0.363329	0.714173	-0.219042	-0.267302	0.422642	0.118122	-0.103605	0.14308
FCHO2_HUMAN	-0.0112373	-0.18243	-0.186013	0.0634487	-0.0276333	0.0873554	0.0925084	0.092059
FCL_HUMAN	0.104885	-0.0707369	0.0762708	0.375841	-0.224574	-0.372932	-0.233386	0.178676
FCN3_HUMAN	-0.0158985	0.00462587	-0.0179179	-0.0289741	-0.0420321	-0.0439171	0.125156	0.362278
FDX2_HUMAN	-0.0296453	0.0730784	0.101752	-0.012437	-0.0106037	0.145674	-0.440256	-0.506279
FEM1A_HUMAN	-0.114229	0.0268819	-0.0375138	-0.0637567	-0.0317337	0.0133355	0.059328	-0.0489189
FEN1_HUMAN	-0.13333	0.0683006	0.0140199	-0.0140199	0.128858	-0.325548	0.0717421	-0.190417
FERM2_HUMAN	0.136484	0.0335988	-0.01535	-0.0766908	0.0796471	-0.0407974	-0.0111125	0.0649685
FES_HUMAN	-0.201337	0.148361	0.692424	0.56684	-0.992435	-0.148361	-1.10213	0.501014
FETUA_HUMAN	-0.00496295	0.222389	-0.136565	-0.0139766	-0.0372021	-0.107169	0.201518	0.662951
FEZ2_HUMAN	0.072334	0.0663082	-0.266569	-0.193802	0.210515	-0.206702	-0.286969	0.0159648
FGD4_HUMAN	0.0339204	0.0622724	-0.162285	0.0457343	0.0168367	-0.0168367	-0.149274	-0.113739
FGGY_HUMAN	0.119602	-0.0134412	0.0134412	0.0730098	0.171756	-0.130256	0.107247	-0.0599291
FGL1_HUMAN	0.133138	-0.133138	-0.21818	0.966137	-0.356595	0.344058	-0.287167	0.226295
FGOP2_HUMAN	-0.0120664	-0.0200931	0.0138837	0.11267	0.0200931	-0.025389	-0.0935703	0.0366706
FHIT_HUMAN	0.30336	-0.142805	0.157073	-0.0389685	0.0463591	-0.156189	-0.164443	-0.101371
FHL1_HUMAN	-0.0227693	-0.151577	0.0374723	-0.18137	0.0579323	0.21715	0.0165269	0.0497473
FHL2_HUMAN	0.0435238	0.0296672	0.0224917	-0.0549937	-0.0296681	0.103303	-0.0224023	0.0301758
FHL3_HUMAN	-0.0802092	0.0162706	-0.0616122	-0.123143	0.163861	0.116335	-0.0663203	-0.00903357
FHOD1_HUMAN	0.00138748	-0.0196935	-0.068233	-0.0237528	0.00662904	0.0391097	0.0196935	0.0214874
FHOD3_HUMAN	-0.0511366	-0.0317857	0.0390281	0.0117739	0.41172	0.380976	-0.245693	-0.167293
FHR2_HUMAN	0.111538	-0.0989382	-0.122057	0.107955	-0.0909212	0.00617862	-0.00703392	0.732231
FHR5_HUMAN	0.237876	0.242827	-0.138749	0.711463	-0.0828642	0.228526	0.199974	0.758329
FIBA_HUMAN	0.0614944	0.0573371	-0.0382959	0.715945	-0.326737	-0.0018559	-0.124927	-0.0776433
FIBB_HUMAN	0.133247	0.0788348	-0.0866239	0.983191	-0.353128	0.00142343	-0.11218	-0.105003
FIBG_HUMAN	0.152938	0.129205	-0.10221	1.26071	-0.434168	0.00901703	-0.147747	-0.128681
FINC_HUMAN	0.00146075	0.0946646	-0.145622	0.520787	-0.336312	-0.0150851	-0.219374	0.0861698
FIP1_HUMAN	0.0675505	-0.0288328	-0.0669685	0.0142639	-0.0123675	-0.0980547	-0.0142639	0.0344694
FIS1_HUMAN	0.251293	-0.194488	0.358973	0.0400109	-0.183345	-0.0648404	0.0921244	-0.286069
FITM1_HUMAN	-0.0980806	-0.140521	-0.189113	-0.255277	0.125183	0.162136	-0.126472	0.143582
FITM2_HUMAN	0.152211	-0.0381929	-0.0961401	-0.10418	0.260435	0.00501123	0.0458627	-0.0102046
FKB10_HUMAN	0.150441	0.400623	-0.607124	0.0406635	-0.186141	0.196943	-0.103634	0.193677
FKB15_HUMAN	0.0708272	0.0656038	-0.314623	-0.0153699	0.0151653	0.0738614	0.0698742	-0.033102
FKB1A_HUMAN	0.00417635	-0.0281996	-0.0577555	-0.0104515	0.00850402	0.0149024	-0.0643084	0.0840938
FKBP2_HUMAN	-0.184913	0.0129197	-0.0550573	-0.179994	0.208218	0.00659662	-0.110711	0.0467798
FKBP3_HUMAN	-0.018565	0.0529073	-0.0357905	0.00848541	0.202064	-0.0375958	0.0423473	0.00623328
FKBP4_HUMAN	0.00641821	0.0162857	-0.110255	-0.0393091	-0.0137726	-0.0065639	0.00877215	0.258894
FKBP5_HUMAN	0.0627123	-0.00772768	0.1987	0.00558292	0.0243238	-0.106506	-0.0576895	-0.0114391
FKBP7_HUMAN	-0.00457738	0.0566458	0.030533	0.00457738	-0.0170578	-0.0154867	0.314634	0.660381
FKBP8_HUMAN	0.0869831	0.0555244	-0.0765564	0.0102347	-0.0491298	-0.0244336	-0.0752756	0.0775192
FKBP9_HUMAN	0.0469573	-0.0522887	-0.500527	-0.138729	-0.175721	0.0571442	0.0690739	0.141786
FL2D_HUMAN	0.152167	0.231287	-0.428845	0.349156	-0.143849	0.5371	-0.495669	-0.0349162
FLII_HUMAN	0.0117838	-0.0449145	0.00488225	0.0450194	-0.0769075	0.0671455	-0.0558505	-0.0166735
FLIP1_HUMAN	-0.00981807	-0.0393422	-0.0859362	-0.101946	0.133366	0.217143	0.00426738	-0.0316525
FLNA_HUMAN	0.118996	0.214507	-0.40201	0.422739	-0.437323	0.0208207	-0.30426	0.240807
FLNB_HUMAN	0.104427	0.0338793	-0.153274	0.0239457	-0.0850839	0.0757197	-0.167662	0.243574
FLNC_HUMAN	0.0081956	-0.0710271	0.0267611	-0.110739	0.00509781	0.163951	0.000600227	-0.191554
FLOT1_HUMAN	0.0310554	0.00652237	-0.00404349	0.332944	-0.260017	-0.0707441	-0.235967	0.0178091
FLOT2_HUMAN	0.148715	0.0890624	-0.0503859	0.292136	-0.170887	-0.01716	-0.196549	-0.029212
FMC1_HUMAN	0.308983	0.0999119	0.173157	0.460306	0.0377661	-0.23715	-0.0377661	-0.101711
FMNL1_HUMAN	-0.0707993	0.0329242	-0.0329242	0.35284	-0.412592	-0.331874	0.045513	0.35948
FMO3_HUMAN	0.0339026	-0.104885	-0.0697503	0.472354	0.0969187	-0.0339026	0.0947497	-0.0740745
FMOD_HUMAN	0.333935	0.296662	-0.116185	0.176522	0.0586293	0.142546	-0.109288	-0.107019
FN3K_HUMAN	0.243458	-0.0362491	0.110931	0.0910036	-0.0629238	-0.124031	-0.156502	-0.0314906
FNBP1_HUMAN	-0.173842	-0.173148	0.286974	0.0183835	-0.0647289	0.0288764	-0.162135	0.353775
FND3A_HUMAN	0.281769	0.147703	-0.033669	-0.0945589	0.137925	0.0313079	-0.182398	-0.0909835
FNDC1_HUMAN	-0.107715	0.503036	-0.0176481	0.682721	-0.170068	-0.409036	-0.345222	0.0176481
FNTA_HUMAN	0.216966	-0.032306	-0.00150316	0.00751172	0.134343	-0.234471	-0.0106951	0.0120856
FNTB_HUMAN	0.315962	-0.109716	0.204778	0.0274829	0.0207898	-0.104273	-0.075117	-0.0207898
FOCAD_HUMAN	0.251595	-0.0908627	-0.0216669	-0.0520789	0.0702673	-0.0205504	-0.117201	-0.0576646
FOLC_HUMAN	-0.350878	-0.224484	0.488665	0.308748	-0.0260937	0.0260937	-0.0572896	0.197227
FOLR2_HUMAN	-0.554727	0.392601	-0.154788	-0.0867859	-0.436278	-0.00258823	0.261132	0.526673
FOXK1_HUMAN	0.117679	-0.021584	-0.344186	0.135201	-0.00392591	0.00392591	0.212583	0.316726
FPGT_HUMAN	-0.167629	0.190648	-0.0201923	0.0201923	0.104514	-0.662523	-0.291766	0.113316
FPPS_HUMAN	0.253045	-0.11917	0.0663744	0.147846	0.0934213	-0.0768052	-0.0554682	-0.0656608
FPRP_HUMAN	-0.0222689	0.0393986	-0.223451	-0.0205569	0.0681458	0.0654111	-0.128087	0.0205569
FR1OP_HUMAN	0.163343	-0.0579508	-0.0048284	0.24854	-0.101997	-0.023634	0.0502568	0.1427
FRDA_HUMAN	0.233749	-0.26876	0.135223	0.0494702	-0.00954635	-0.204142	0.0991881	-0.241834
FREM2_HUMAN	-0.0449335	-0.291098	-0.296694	0.269916	0.0986403	-0.0632421	0.714481	-0.157257
FRIH_HUMAN	-0.258484	0.277177	-0.282548	-0.00417128	0.161577	0.0244436	0.602322	-0.0334097
FRIL_HUMAN	-0.178144	0.67141	-0.151297	-0.0508877	0.262179	-0.0515482	0.711005	0.278698
FRMD3_HUMAN	0.215795	-0.0110931	-0.000480469	0.116058	0.123355	-0.0931578	-0.0110912	-0.0892874
FRY_HUMAN	-0.508468	0.105031	0.381257	0.406932	-0.371897	-0.846544	-0.178203	0.188692
FRYL_HUMAN	0.137056	-0.0304263	-0.15641	0.0860831	-0.0304799	-0.0844971	-0.0890649	-0.292234
FSCN1_HUMAN	0.183046	-0.0185051	0.0392229	0.0466704	-0.194318	-0.270001	-0.224935	0.170776
FSD1L_HUMAN	-0.915094	-0.968529	0.851507	0.0813408	-0.0813408	0.58941	-0.808766	0.763898
FSD2_HUMAN	-0.046907	-0.0639037	0.050494	-0.00058723	0.0989776	-0.00539307	0.0220716	0.0161487
FUBP1_HUMAN	-0.0213452	-0.135487	-0.035472	-0.0111256	-0.00298101	0.267276	0.0180872	0.0177277
FUBP2_HUMAN	0.124376	0.0689915	-0.0480348	-0.176736	0.0948504	0.130234	-0.106662	0.0851529
FUBP3_HUMAN	-0.0708426	0.201622	0.148559	0.1109	-0.0253399	-0.342735	0.289718	-0.0607302
FUCO_HUMAN	-0.576635	-0.0676606	-0.580583	0.167307	-0.202446	-0.152228	0.184039	0.261295
FUK_HUMAN	-0.0319721	-0.0169609	-0.092521	0.0195419	-0.0103611	-0.0660219	0.156324	0.296513
FUMH_HUMAN	0.222013	-0.0715727	0.19761	0.107192	-0.0582282	-0.148326	-0.0401507	-0.0577289
FUND2_HUMAN	0.147806	-0.00809257	0.0671435	0.0774821	0.00809257	-0.188618	-0.124105	-0.102164
FUS_HUMAN	0.207677	0.035556	-0.487373	-0.185929	0.138024	-0.00405052	-0.0284358	0.00405052
FUT11_HUMAN	-0.0670642	-0.105669	-0.0150687	-0.0519322	-0.0548689	0.214858	0.320306	0.0605264
FWCH2_HUMAN	0.204644	-0.0437966	0.0219662	-0.0219662	0.25568	0.0826068	-0.0279537	-0.16033
FXL15_HUMAN	1.04799	0.491092	-0.381565	0.0287543	0.427947	-0.325235	-0.0287543	0.0916148
FXL18_HUMAN	-0.137913	0.664322	0.689136	-0.606234	0.481502	-0.293601	0.543958	0.137913
FXR1_HUMAN	-0.0192246	-0.0998626	-0.0429486	-0.0541805	0.152528	0.0217705	-0.0390768	0.0282158
FXR2_HUMAN	-0.0145939	-0.0300091	-0.0062704	-0.0977604	0.0145939	0.155766	-0.107843	-0.0733978
FXRD1_HUMAN	0.0480505	-0.298889	0.0989252	0.0773663	0.00114155	-0.0387904	-0.0346981	-0.0591699
FYB1_HUMAN	0.694835	-0.0485518	-0.405939	1.77504	-0.136954	-0.0996607	0.0485518	0.332856
FYCO1_HUMAN	-0.023025	0.0020536	-0.146798	-0.0362646	-0.00246254	0.115044	0.168827	0.0836697
FYN_HUMAN	-0.566201	-0.70628	0.41906	-1.04988	0.296267	-0.779507	0.0234739	1.20045
G3BP1_HUMAN	-0.0201267	0.0169531	-0.0488905	-0.0440619	0.0386522	-0.00106289	0.00327727	0.0859195
G3BP2_HUMAN	-0.00553151	-0.0675821	-0.0400479	-0.106064	0.0905245	0.0400479	-0.0361209	0.0633402
G3P_HUMAN	-0.181144	0.20144	0.0156295	-0.034769	0.34001	-0.263454	0.211144	-0.0176128
G45IP_HUMAN	0.0839969	-0.13879	0.26789	0.130426	-0.249676	-0.128102	-0.171265	-0.0880181
G6PD_HUMAN	0.178959	0.0101728	0.146955	0.443404	-0.288763	-0.311293	-0.344983	0.0717996
G6PE_HUMAN	-0.0724999	-0.018951	-0.0317875	-0.069056	-0.0127431	0.115487	-0.0254791	0.0398518
G6PI_HUMAN	-0.0908852	0.0371556	0.0215742	0.107546	0.15407	-0.208506	0.242131	-0.0433983
G6PT1_HUMAN	-0.113199	-0.12446	0.026373	0.146808	0.302505	-0.0997721	-0.110932	-0.026373
GABPA_HUMAN	0.451989	-0.55783	-0.0516161	-0.463279	-0.63316	0.328243	-0.363134	0.0319179
GAK_HUMAN	-0.17317	0.530157	-0.398809	-0.42914	0.148604	-0.178492	0.188003	0.436437
GAL3A_HUMAN	0.580998	-0.144101	0.540026	0.173526	-0.0359003	-0.188221	-0.0333347	-0.206116
GALC_HUMAN	0.0496301	-0.0849437	-0.179438	0.25621	0.121212	-0.189005	-0.183814	0.166926
GALD1_HUMAN	0.108638	-0.0723028	0.0401811	-0.200783	-0.099586	0.0750071	0.0949008	0.0257575
GALE_HUMAN	0.0781375	0.0169306	0.00916	0.0656106	0.0796957	-0.275904	-0.0851368	-0.0885561
GALK1_HUMAN	0.0376377	-0.0268378	0.121694	-0.0680416	0.297115	-0.0892626	-0.0335922	0.149399
GALK2_HUMAN	0.526478	0.0544282	0.143114	1.37955	-0.0544282	-0.157436	-0.0587197	-0.425997
GALM_HUMAN	0.346697	-0.153292	-0.0857859	0.0582556	0.0956563	-0.0832005	0.00296122	0.111123
GALNS_HUMAN	0.0434239	-0.275465	-0.0496558	-0.229072	0.316305	-0.331969	0.142999	0.215096
GALT_HUMAN	-0.147229	0.413531	0.123907	0.162149	0.0381908	-0.315138	-0.127492	-0.0987101
GALT2_HUMAN	-0.0114572	0.0294155	-0.076789	0.0450043	0.087526	0.0280071	-0.0802801	0.0219813
GAMT_HUMAN	0.0532297	-0.0214071	-0.0639878	0.0620215	0.183005	-0.179089	0.0579086	0.0511737
GANAB_HUMAN	0.00443799	0.0178373	-0.0452611	0.0202661	-0.00831063	-0.0313706	0.0295445	0.00543909
GANC_HUMAN	0.204803	-0.233409	0.00212221	0.0397164	0.191161	-0.17078	0.241153	-0.137357
GANP_HUMAN	-0.00691793	0.0547352	0.0575746	-0.187328	0.00679394	-0.141628	-0.00658116	0.011943
GAPD1_HUMAN	-0.0361744	0.0319837	-0.00615543	0.11213	-0.00451056	-0.0308707	-0.0489017	-0.0213942
GAPR1_HUMAN	0.0987902	-0.00604051	-0.0682246	0.460271	-0.484936	0.00277354	-0.104556	0.125443
GAR1_HUMAN	0.131796	-0.0890643	-0.00729472	0.164119	-0.295419	0.154446	-0.0497649	0.00729472
GARS_HUMAN	0.0336858	-0.0898143	0.0059135	0.0108151	0.0437063	-0.000796417	0.0211208	-0.0497419
GAS6_HUMAN	0.0522227	-0.00564928	0.0640362	-0.000100578	0.651679	-0.110826	-0.170561	0.000100578
GATA_HUMAN	0.0270171	-0.286879	0.345256	0.158177	-0.0791076	-0.326118	-0.0107119	-0.0270171
GATB_HUMAN	0.0340384	0.0365171	0.148553	-0.0340384	0.00993174	-0.135281	-0.323578	-0.0437726
GATC_HUMAN	0.107468	-0.0547878	0.122507	0.102927	-0.484659	-0.249992	-0.183435	-0.168063
GATM_HUMAN	0.207269	-0.277806	0.0323857	-0.227122	-0.0389232	-0.0833513	0.209516	0.0788358
GBB1_HUMAN	0.135006	0.0881167	-0.0948342	0.206046	-0.0555166	-0.0148547	-0.0363793	0.104597
GBB2_HUMAN	0.0223837	0.0571882	-0.107878	-0.0284901	0.0451162	0.0033796	0.0381801	-0.00211193
GBB3_HUMAN	0.0104477	-0.0712111	-0.259852	0.194585	0.102224	-0.0444224	-0.111314	0.0588323
GBB4_HUMAN	0.0966946	0.107004	-0.183932	0.182932	0.0536719	-0.0786112	0.0315453	0.115877
GBF1_HUMAN	0.0396063	-0.05372	-0.0303239	0.0336317	0.00575552	-0.000140783	0.00710663	-0.0905834
GBG12_HUMAN	0.0261834	-0.00436466	-0.168431	-0.0516655	-0.237937	-0.0240315	-0.241755	0.244132
GBP1_HUMAN	-0.316422	0.0281567	0.019535	-0.477314	0.0275642	-0.327224	0.25872	-0.0275642
GBP2_HUMAN	0.160687	0.0261538	-0.0903719	-0.036019	0.0227133	0.00243656	-0.135819	0.188297
GBP4_HUMAN	-0.422244	-0.900567	0.118825	-0.216238	0.134773	-1.11502	-0.111264	0.504192
GBRAP_HUMAN	0.120918	-0.374864	-0.462058	-0.331127	0.1226	0.248492	-0.0655019	0.0655019
GBRL2_HUMAN	0.293456	-0.229888	0.0081752	-0.130665	-0.0114732	0.29421	-0.145345	0.0552462
GCC2_HUMAN	0.121499	0.109763	0.206416	-0.0761539	-0.26025	-0.072991	0.072991	-0.0897276
GCDH_HUMAN	0.259365	-0.0165554	0.197791	0.157208	-0.21919	-0.0434344	-0.0385298	-0.0417229
GCFC2_HUMAN	0.796764	-0.352874	0.383677	0.480178	-1.24232	-0.0588208	0.0243586	-0.0243586
GCN1_HUMAN	-0.0152975	-0.0856723	-0.0785755	-0.00864194	-0.016997	0.0863358	0.0253836	0.0325537
GCP2_HUMAN	0.0127254	-0.076581	-0.149033	-0.0552367	-0.208101	0.0404111	-0.130448	0.121241
GCP3_HUMAN	0.0297394	0.0336207	0.120189	0.021077	-0.178823	0.0438802	0.0278676	-0.177736
GCP4_HUMAN	0.0261686	0.374505	0.0642185	-0.0884496	-0.0504239	-0.135781	-0.144146	0.0595496
GCP6_HUMAN	0.200478	-0.246465	0.334745	-0.014202	0.372429	0.014202	-0.150426	-0.0895474
GCP60_HUMAN	-0.130353	0.000728157	0.00854493	-0.00261963	0.112168	0.181212	0.060486	-0.493048
GCR_HUMAN	-0.000193799	0.0224807	0.0477311	0.0994457	-0.17927	0.0346246	-0.60027	0.100775
GCSH_HUMAN	0.21575	-0.151565	0.284151	0.152018	0.035084	-0.192415	-0.0755266	-0.256118
GCYB1_HUMAN	0.287872	-0.113803	-0.0160362	0.223378	-0.0683894	-0.00512883	-0.115917	0.264834
GDC_HUMAN	0.189857	0.463042	-0.0757305	-0.0608701	0.425032	0.00119249	-0.00119249	-0.0450031
GDE_HUMAN	-0.0935203	0.0465032	0.00354247	-0.138134	0.163276	-0.00263157	0.114943	-0.116481
GDE1_HUMAN	-0.0229117	-0.00489985	-0.24302	0.0377414	0.142214	0.05016	0.0219765	-0.0490319
GDIA_HUMAN	0.0747783	-0.0261089	-0.0220493	-0.0524489	0.0220493	-0.0358093	0.0491073	0.132825
GDIB_HUMAN	0.0218832	-0.0974073	0.0170995	0.0302593	0.0118354	-0.0675803	-0.050341	0.0270397
GDIR1_HUMAN	0.0583467	-0.0621661	-0.0573061	0.0193399	0.198509	-0.00734059	0.0382105	0.043238
GDIR2_HUMAN	0.303237	-0.108257	-0.0153808	0.510771	-0.163912	-0.268778	-0.118765	0.0594284
GDPD1_HUMAN	0.217093	-0.213165	0.0437283	-0.0767743	-0.0979062	-0.229151	0.00680413	-0.199723
GDPP1_HUMAN	0.0548008	-0.153101	0.259385	0.0296423	0.17845	-0.652327	-0.0296423	0.077825
GELS_HUMAN	0.0788732	0.041602	-0.0125658	0.00295108	-0.0435167	0.0348951	-0.171592	0.150653
GEMI5_HUMAN	-0.0262105	-0.0454408	-0.115978	0.0538843	0.0138591	0.12278	-0.0644836	-0.0868993
GEMI7_HUMAN	0.333101	0.0991369	0.191692	-0.031854	0.00681814	-0.00681814	-0.0521036	0.242055
GEPH_HUMAN	0.0590339	-0.0287319	-0.00462737	-0.0306021	-0.031405	0.0253928	0.044851	-0.16508
GET4_HUMAN	0.0333188	-0.237579	0.102813	-0.00468648	-0.0214584	0.0409338	0.0127786	-0.0613253
GFPT1_HUMAN	-0.0736058	-0.0334185	0.0246166	-0.0270188	0.0820766	-0.00373139	0.0358356	-0.143291
GGA1_HUMAN	0.0534602	0.0684028	-0.0232644	0.0759275	-0.0799709	-0.0684028	-0.0850959	0.122533
GGA2_HUMAN	0.275804	-0.195175	0.319762	-0.378741	0.622531	0.159449	0.030136	0.284227
GGA3_HUMAN	-0.0150126	-0.348047	-0.134959	-0.0151715	0.0150126	0.189524	-0.472096	0.270034
GGACT_HUMAN	0.088328	0.0130175	-0.0629598	0.028263	0.124933	-0.0751083	-0.0163718	-0.00343117
GGCT_HUMAN	-0.000478573	-0.0797215	0.0786748	0.147495	-0.162497	-0.13836	0.0146994	0.037596
GGH_HUMAN	0.284761	-0.261212	-0.268537	0.225926	-0.0264775	0.115603	0.0468311	0.326762
GGPPS_HUMAN	-0.225259	-0.0295285	0.000672864	-0.201839	0.250371	0.123829	0.199613	0.0154993
GGT5_HUMAN	-0.0601941	0.209307	-0.194191	0.066295	-0.277199	0.195105	-0.00525933	0.295385
GGT7_HUMAN	0.0799066	0.232562	0.000555897	0.0160297	0.221034	-0.205445	-0.114208	-0.210548
GGYF1_HUMAN	0.388006	-0.501276	-0.36592	0.039285	0.751038	-0.039285	-0.0409322	-1.28852
GGYF2_HUMAN	-0.132351	0.0599628	-0.00804403	-0.086529	0.0433387	0.0164884	0.0587509	0.0179131
GHDC_HUMAN	0.030966	-0.0303722	0.0132347	-0.101858	-0.0507666	-0.0884333	-0.0132347	0.26826
GID8_HUMAN	0.354673	0.118679	0.0904887	-0.289342	-0.0904887	-0.202624	-0.091306	0.0998138
GIMA1_HUMAN	0.127026	0.259706	-0.0205809	-0.0788006	0.0117974	-0.0117974	-0.277551	0.0250374
GIMA4_HUMAN	0.172846	-0.314879	0.00573933	-0.0673125	-0.0423648	-0.0684726	0.0953875	0.272263
GIMA5_HUMAN	0.388755	0.142897	-0.308796	0.053478	0.268534	-0.263164	-0.053478	0.241785
GIMA7_HUMAN	0.189369	-0.0527721	-0.0177929	-0.0690966	-0.0280336	-0.131525	-0.0966253	0.0911907
GIMA8_HUMAN	-0.0783405	0.00615743	0.147325	0.00375797	0.107129	-0.0198344	-0.347601	0.0979118
GIPC1_HUMAN	0.0176125	-0.0290094	-0.192715	0.0597516	0.0290094	-0.0011314	0.0222632	-0.116773
GIPC3_HUMAN	0.133314	-0.0184627	-0.132024	-0.00902131	0.313639	-0.157941	0.149055	-0.0509944
GIT1_HUMAN	-0.0294093	-0.140298	-0.146447	0.0294093	0.180885	0.221238	0.164508	-0.0911879
GIT2_HUMAN	0.232017	-0.0406578	0.0705841	-0.0499334	0.040529	-0.0248917	0.0154505	0.0514518
GLE1_HUMAN	0.0509432	-0.0238638	-0.0757082	0.00351601	-0.296044	0.384344	-0.00351601	0.252119
GLGB_HUMAN	0.021654	-0.203278	0.0269389	0.258941	0.0324615	-0.163128	0.127378	-0.0491646
GLMN_HUMAN	0.019411	0.00491114	-0.0917009	-0.00491114	0.375634	-0.228597	-0.502146	0.176427
GLNA_HUMAN	0.559185	-0.218933	0.138879	-0.250212	0.0286127	-0.314718	-0.328747	0.194166
GLO2_HUMAN	-0.0143964	-0.105103	-0.0212277	-0.0444212	0.106182	0.050886	0.00310098	-0.0254271
GLOD4_HUMAN	0.0153492	-0.118107	0.0146272	0.0853497	0.118668	-0.231653	0.0782658	0.0290421
GLPA_HUMAN	0.199927	0.034556	-0.034556	0.412453	0.080747	-0.28129	-0.011432	-0.415237
GLPC_HUMAN	-0.0609616	0.180287	-0.119984	-0.000397515	0.000397515	-0.209241	-0.174906	-0.286533
GLRX1_HUMAN	-0.0339845	0.384696	-0.00926332	-0.0199021	0.439453	-0.409341	0.324311	-0.129907
GLRX2_HUMAN	0.238267	0.149294	0.278116	0.00477676	-0.000559509	-0.100339	-0.324653	-0.122188
GLRX3_HUMAN	0.0458732	-0.0171053	0.109321	0.173016	-0.0448553	-0.250016	-0.135854	0.0469618
GLRX5_HUMAN	0.125022	-0.110389	0.32037	0.0378662	-0.244959	0.036793	-0.0448146	-0.295203
GLSK_HUMAN	0.077185	-0.0116762	0.135837	0.10482	-0.0764999	-0.160013	-0.166148	0.0607834
GLTP_HUMAN	-0.0536167	-0.136662	0.126132	0.274911	-0.00224186	0.00967963	-0.0900251	0.00224186
GLU2B_HUMAN	0.058999	0.0867869	-0.0288668	0.0186572	-0.00868529	0.0245846	-0.0365036	0.101662
GLUCM_HUMAN	-0.0472462	0.0829731	0.42048	0.0341568	0.177058	-0.280482	-0.778914	0.158617
GLYC_HUMAN	-0.118438	0.0830731	-0.00208957	-0.139524	0.124672	0.0582405	-0.403597	0.032242
GLYG_HUMAN	-0.162061	-0.0378061	0.0223149	-0.0156579	-0.0492845	0.182877	0.0497091	0.0137144
GLYM_HUMAN	0.0477354	-0.113561	0.0930112	0.0194967	0.0392868	-0.00969721	-0.150634	-0.0353982
GLYR1_HUMAN	-0.0303705	-0.104403	-0.00523572	-0.127009	0.144168	0.177004	0.0397403	-0.0831643
GMDS_HUMAN	0.0678277	-0.452754	-0.0871525	0.348492	-0.0358779	0.0358779	-0.471923	0.822058
GMFB_HUMAN	-0.120646	0.00258673	0.0537096	-0.00269884	0.175752	-0.222921	0.105093	0.143616
GMFG_HUMAN	0.139441	-0.137518	0.177637	0.590416	-0.0713071	-0.342031	-0.31038	0.0410848
GMPPA_HUMAN	0.114092	0.0999541	0.127834	-0.0534119	-0.0307334	-0.42325	0.0925561	0.0189217
GMPPB_HUMAN	0.090971	0.0416984	-0.09143	-0.163262	-0.00114035	-0.267609	0.407926	0.0566512
GMPR1_HUMAN	0.0111059	0.166672	0.0522678	-0.101484	0.060416	-0.210563	-0.0290532	0.0759778
GMPR2_HUMAN	0.0257964	-0.0044025	0.00535628	-0.116445	0.266297	-0.0446952	-0.0737368	-0.0138988
GNA1_HUMAN	0.144865	-0.100883	-0.176842	0.0628306	0.165931	-0.16328	0.145861	0.331264
GNA11_HUMAN	0.0658344	0.00369471	-0.331994	-0.19792	-0.318949	-0.00369471	0.0239741	0.0872768
GNA13_HUMAN	-0.060967	0.138221	-0.0399932	0.174044	0.253869	-0.192066	-0.0980053	0.00904278
GNAI1_HUMAN	0.419012	0.249836	-0.24431	0.0908072	-0.0333819	0.0333819	-0.30033	0.245507
GNAI2_HUMAN	0.247573	0.0139873	-0.0872661	0.247817	-0.112641	-0.0772273	-0.0535911	0.171253
GNAI3_HUMAN	0.131914	-2.78e-05	-0.13266	0.497018	-0.194263	-0.0909898	-0.576313	0.11841
GNAO_HUMAN	0.0499007	-0.0978809	-0.132413	0.00575129	0.293989	0.262778	-0.139786	0.248779
GNAQ_HUMAN	0.159293	0.006454	-0.0731473	0.404941	-0.0694161	-0.0203588	-0.205032	-0.006454
GNAS1_HUMAN	0.0232406	0.0245812	-0.0364088	-0.015798	0.0160486	0.00752546	-0.0248654	0.0535585
GNAZ_HUMAN	0.188185	0.12404	0.0501588	0.831848	-0.0620001	-0.184889	-0.115975	-0.0194538
GNL1_HUMAN	0.0334444	0.0906751	-0.020559	0.0200661	-0.144959	0.0254324	-0.0206388	-0.0371405
GNL3_HUMAN	-0.179588	0.100527	-0.0367706	-0.0987327	0.232902	-0.253806	0.0367706	-0.963656
GNPAT_HUMAN	-0.0352232	-0.238269	-0.0442854	0.0257109	0.151841	0.0581914	0.018445	0.312062
GNPI1_HUMAN	0.0705893	-0.110675	-0.0561839	-0.0264413	0.214629	-0.233291	0.0264413	-0.0246928
GNPI2_HUMAN	0.0177189	0.0234911	-0.0228204	0.108987	-0.00135897	-0.0359633	-0.0979318	-0.0564434
GNS_HUMAN	0.123773	-0.0354612	-0.0143024	0.143267	-0.0823624	-0.1503	-0.13469	0.348758
GOGA2_HUMAN	0.0662169	0.0908397	0.0155242	0.059272	-0.144192	-0.0501066	0.0547711	-0.150608
GOGA3_HUMAN	0.0129527	-0.0485944	-0.0543446	-0.00139458	-0.0286355	0.0702875	0.0793659	0.0905761
GOGA4_HUMAN	0.109785	-0.0440381	0.136974	-0.0549854	-0.0383417	0.00821568	0.0204353	-0.274248
GOGA5_HUMAN	-0.0662887	0.106085	-0.0620727	0.053646	0.181308	0.144877	-0.0491467	-0.0075034
GOGA7_HUMAN	-0.138649	0.0203601	0.168004	0.123662	-0.62139	0.00861298	-1.03092	0.16175
GOGB1_HUMAN	0.0560325	-0.113154	-0.115297	0.00741239	-0.0194672	0.0842867	0.0260568	0.0170428
GOLI4_HUMAN	-0.08032	-0.00586613	-0.114027	0.0245211	0.0786122	0.00586613	-0.0862936	0.052639
GOLP3_HUMAN	-0.0824882	0.149971	0.262489	-0.0184003	0.0184003	-0.190706	0.109874	0.0410508
GOPC_HUMAN	0.00565315	0.0734197	-0.0247425	0.105405	-0.145723	-0.0202102	0.3347	0.00468764
GORS2_HUMAN	0.055166	-0.204447	0.0603017	-0.0298917	-0.0260247	-0.0165803	0.0231559	0.113214
GOSR1_HUMAN	0.0329349	-0.376068	0.189413	0.0214039	-0.206452	-0.684215	-0.522119	0.225215
GOSR2_HUMAN	0.278467	-0.0758995	0.0292288	0.0640517	0.10314	-0.441197	-0.322984	0.0068956
GP1BA_HUMAN	0.445666	-0.125387	0.0208218	1.84349	-0.355353	-0.0566174	-0.196849	0.076865
GP1BB_HUMAN	0.204121	0.0766667	-0.0652982	2.01948	-0.51652	0.0388717	0.150969	-0.340502
GPAT1_HUMAN	-0.0363991	-0.109875	0.0599065	-0.0885034	-0.329477	-0.034517	0.0441946	-0.0594589
GPAT3_HUMAN	0.236134	-0.16433	0.101255	-0.00593638	0.0667292	0.0779182	-0.163243	0.0204353
GPC1_HUMAN	-0.0620578	-0.0323697	-0.27115	0.0224123	0.296259	-0.0313545	0.00612459	0.213652
GPC4_HUMAN	-0.0180445	-0.00328769	-0.0877549	-0.0781535	0.275906	0.0540952	-0.0980167	0.0535189
GPC5B_HUMAN	-0.177898	0.00546144	-0.00497537	0.0322207	0.0103572	-0.183381	-0.127976	-0.155319
GPCP1_HUMAN	0.0459944	-0.19824	0.0324624	0.168419	0.0566816	-0.0889595	-0.0274928	-0.037025
GPD1L_HUMAN	0.42363	-0.143983	0.11858	0.171571	0.0703868	-0.243822	-0.0216452	-0.0714021
GPDA_HUMAN	-0.0682503	0.213418	-0.075838	0.0360771	0.460694	-0.385464	0.232829	-0.0952838
GPDM_HUMAN	-0.0875478	0.140769	0.0205471	-0.0407054	0.128631	-0.0291678	0.0192658	-0.255735
GPHRA_HUMAN	-0.0269683	0.0492143	0.0865314	-0.156013	0.109003	-0.24755	0.0269683	-0.167756
GPI8_HUMAN	0.132961	-0.080466	-0.0351401	0.0808732	0.0131211	-0.1337	-0.163108	0.0560756
GPKOW_HUMAN	0.1039	-0.0929519	0.180439	0.0533459	-0.0430261	-0.0938931	-0.0831703	0.0721544
GPN3_HUMAN	0.134684	-0.00174785	-0.0394348	0.0810837	-0.0764399	-0.191994	-0.132844	0.0394348
GPNMB_HUMAN	0.237477	0.262844	-0.157857	0.297834	-0.250751	-0.0821119	-0.146176	0.212106
GPTC8_HUMAN	-0.154249	-0.05893	-0.0661532	-0.0317767	0.01101	0.142081	-0.0787249	0.132113
GPV_HUMAN	0.297971	-0.20632	-0.0925312	0.382461	-0.013728	0.126765	0.258182	-0.0693738
GPVI_HUMAN	-0.135401	-0.162938	-0.0647083	0.575744	0.133197	-0.383984	0.0647083	0.097986
GPX1_HUMAN	0.131596	-0.27043	0.134929	0.25412	0.0604381	-0.121882	-0.0043888	-0.0466329
GPX3_HUMAN	1.6e-05	0.221906	-0.0789458	0.0287768	-0.0879078	0.0858444	0.0769024	0.365035
GPX4_HUMAN	0.0776394	-0.153815	0.112471	0.0607876	0.0589062	-0.0259769	-0.022044	-0.140459
GPX7_HUMAN	0.00654215	0.346847	-0.00654215	0.00785162	-0.149942	-0.0495014	-0.173126	0.181817
GRAN_HUMAN	0.230571	0.102208	0.0890376	0.624171	-0.265065	-0.436912	-0.200379	0.0293833
GRAP1_HUMAN	-0.115323	0.152902	-0.0156664	0.147254	0.151923	-0.0601454	0.107791	0.00450931
GRB2_HUMAN	-0.00448272	-0.0421581	-0.0154689	-0.0290482	0.0296381	0.0451997	-0.0231985	0.0374713
GRDN_HUMAN	-0.0406101	0.129894	0.181707	0.0406101	-0.103028	-0.112123	-0.260664	0.0511378
GRHPR_HUMAN	0.175775	-0.105414	0.186419	0.160251	0.0272474	-0.192258	0.0170562	-0.151816
GRIP2_HUMAN	0.0138109	-0.260524	-0.0220538	-0.0138109	-0.157869	-0.241329	0.128643	0.0675685
GRK6_HUMAN	-0.0424933	0.125697	0.0377206	0.236734	-0.380787	-0.237282	-0.178078	0.0300852
GRP2_HUMAN	0.594344	-0.184936	0.0879167	1.2664	-0.439871	-0.0879167	-0.32064	0.196639
GRP75_HUMAN	0.254693	-0.0426242	0.265626	0.0298087	-0.0531563	-0.0841732	-0.0426122	-0.146368
GRP78_HUMAN	0.0207682	-0.0688749	-0.0645249	0.0549683	-0.039856	0.0722518	-0.00678089	-0.0517393
GRPE1_HUMAN	0.34142	-0.000955601	0.327372	-0.0437464	-0.238206	-0.0938287	-0.287284	-0.0167354
GRSF1_HUMAN	0.113045	-0.000563383	0.0373424	0.082378	0.00239423	-0.157571	-0.0900937	-0.0315297
GRWD1_HUMAN	-0.00573206	0.100865	-0.0370763	-0.00880683	0.0274629	0.0717404	-0.0223069	-0.053628
GSDME_HUMAN	0.676129	-0.0782382	0.48488	0.627506	0.185199	-0.251011	-0.0213815	-0.228095
GSH0_HUMAN	0.243267	-0.140822	0.232125	0.173057	-0.22222	-0.161151	-0.309231	-0.0466966
GSH1_HUMAN	0.149121	-0.0829316	0.172677	0.0989849	-0.0935799	-0.320673	-0.234143	0.155065
GSHB_HUMAN	0.0494516	-0.0892101	-0.00811154	0.064596	-0.0227382	-0.00693217	0.0557207	0.0131232
GSHR_HUMAN	0.104702	-0.0221012	0.00172627	0.057341	0.0210631	-0.187517	-0.0244612	0.00307527
GSK3A_HUMAN	0.14179	-0.0194212	-4.02e-05	-0.0656209	0.0511534	-0.0752284	-0.122649	0.0860469
GSK3B_HUMAN	0.0293478	-0.281532	0.00566423	0.0277516	0.0945508	-0.0730456	0.113989	0.0400781
GSLG1_HUMAN	-0.0185569	0.00210626	0.0814281	0.0364952	-0.115465	0.0882988	0.0848003	-0.0340603
GST2_HUMAN	0.0195507	-0.234111	-0.155022	-0.0149999	-0.0195507	0.214778	-0.209901	0.188633
GSTK1_HUMAN	0.151331	-0.132118	0.324384	0.224438	-0.0602823	-0.229844	-0.0285049	-0.0338065
GSTM1_HUMAN	0.073271	-0.174235	0.701072	3.4457	-0.16834	-0.073271	0.271857	0.35544
GSTM2_HUMAN	0.0607182	-0.119815	0.120206	0.60337	0.0174681	-0.0414323	-0.18747	0.167031
GSTM3_HUMAN	0.0167418	-0.255815	-0.0180013	0.302632	0.426981	0.0312447	-0.0599915	0.250327
GSTM4_HUMAN	-0.0460505	-0.050489	0.267369	0.66776	0.0184322	-0.289693	-0.0125444	-0.0294012
GSTO1_HUMAN	0.132455	-0.193871	0.269764	0.338479	-0.0874564	-0.0352931	-0.00206491	0.0164823
GSTP1_HUMAN	0.0439154	-0.0854137	-0.00833197	0.0512	0.037739	-0.112857	0.098882	0.149467
GSTT1_HUMAN	0.594128	0.0230732	-0.00986381	-0.0181114	0.656536	-0.709189	0.743503	-0.766784
GTF2I_HUMAN	0.0447133	-0.035567	-0.0944252	-0.0621993	0.0137073	-0.0246189	-0.0155333	0.132863
GTPB1_HUMAN	-0.00630225	0.0298229	0.00969867	-0.0442842	-0.0208516	-0.00942544	-0.00239332	0.0305714
GTPB3_HUMAN	0.455604	-1.00241	0.34816	0.146015	-0.510316	-0.0782259	-0.562562	0.38872
GTPB6_HUMAN	-0.195266	-0.011906	0.12614	0.350254	-0.0423663	0.011906	0.200205	0.206852
GTPB8_HUMAN	0.0794513	-0.249752	-0.0382506	0.468184	-1.54238	-1.3547	-1.27757	0.0382506
GTPBA_HUMAN	0.0625773	-0.0242791	0.0821738	0.146767	-0.715001	-0.294732	-0.210543	-0.0414073
GTR1_HUMAN	0.198952	0.0639349	0.34439	0.654812	-0.710407	-0.440274	-0.467313	-0.080786
GTR4_HUMAN	0.0528366	-0.0448596	0.1711	0.0226295	-0.013045	0.0116882	-0.105382	-0.074972
GTR5_HUMAN	-0.0118257	-0.477178	-0.103206	0.188072	-0.25932	0.0586661	0.398684	-0.18915
GUAA_HUMAN	0.0840185	0.000509797	0.0948452	0.0683287	-0.0577426	-0.146039	-0.0461796	0.00964575
GUAD_HUMAN	-0.263824	0.142584	-0.378167	-0.461105	0.814006	-0.235838	1.20067	0.101983
GUF1_HUMAN	0.107375	-0.135621	0.153682	-0.0209216	-0.183111	-0.0367856	0.0857099	-0.0295013
GYS1_HUMAN	0.0942388	-0.0717258	-0.00584485	-0.0222815	-0.00952207	0.0125145	0.0550542	-0.0663318
H10_HUMAN	-0.039412	-0.0604801	-0.0412833	-0.246792	-0.0299873	0.170343	0.0102212	0.00420174
H15_HUMAN	0.278486	0.246968	0.00912883	0.492841	-0.107043	-0.160267	-0.170331	-0.347102
H1BP3_HUMAN	0.211546	-0.000577125	-0.0133038	-0.00753686	0.0754586	-0.0530469	-0.291205	0.366393
H1X_HUMAN	0.0818369	0.0335831	-0.115584	-0.0893608	-0.0773543	0.148341	-0.12854	0.17605
H2A2A_HUMAN	0.0456902	-0.0745783	-0.179068	-0.0196194	-0.0807846	0.373191	-0.350598	0.233619
H2AW_HUMAN	0.0389719	0.00942367	0.0466434	0.0602352	-0.112009	0.0158465	-0.0506344	-0.125751
H2AX_HUMAN	-2.00462	-1.46875	-0.0133922	-1.62534	0.316192	-1.36324	0.116289	1.08461
H2AY_HUMAN	-0.0568007	-0.0169222	-0.0498847	-0.136233	-0.00315588	0.0964454	0.0131993	0.0704772
H2AZ_HUMAN	-0.144381	0.0876282	-0.142502	-0.202224	0.0029494	-0.014487	0.170265	0.127531
H2B2C_HUMAN	0.425776	-0.00703822	-0.254129	0.0561407	-0.127418	-0.621186	-0.163064	0.103353
H2B2F_HUMAN	0.0670554	0.0567285	-0.17415	0.0148075	-0.16999	0.238673	-0.0228753	0.184782
H31_HUMAN	-0.911327	-1.02695	0.071703	-0.706806	0.630495	-1.35731	0.5476	0.280612
H32_HUMAN	-0.224692	-0.454463	0.116441	-0.190842	0.354881	-0.279842	-0.116441	0.437001
H33_HUMAN	-0.177271	-0.122233	-0.174377	-0.417007	-0.00662424	-0.0259088	0.220928	0.149135
H4_HUMAN	0.175726	0.0164321	-0.264607	0.020157	-0.00226749	-0.137485	-0.0142594	0.168382
H90B3_HUMAN	-0.009184	0.472963	0.0333347	0.009184	-0.146226	-0.0185926	0.0468497	0.864983
HABP2_HUMAN	0.337954	0.407743	-0.200339	-0.131462	-0.209072	0.368071	-0.118967	0.446812
HACD1_HUMAN	-0.110529	-0.0593793	-0.136919	-0.200331	0.103713	0.11848	0.0224049	-0.00971629
HACD3_HUMAN	-0.17677	0.0817914	0.00382184	-0.00382184	0.29163	-0.0123915	0.107828	-0.110812
HACD4_HUMAN	0.276914	0.106172	-0.20009	1.04546	0.0364506	-0.0364506	-0.210562	-0.618063
HAKAI_HUMAN	0.00836157	0.129162	-0.133954	-0.116988	0.134407	0.087402	-0.0699822	-0.00252947
HAP28_HUMAN	-0.0475906	-0.0678744	0.153069	-0.100651	0.140838	0.144282	0.0408338	-0.0411463
HAT1_HUMAN	-0.0553786	-0.102502	0.0504856	-0.119498	0.0585608	0.167194	0.0915706	-0.0729526
HAX1_HUMAN	0.00248283	-0.169363	0.111816	0.0191975	-0.000327616	0.0140731	-0.00698547	0.00775057
HBS1L_HUMAN	-0.0961377	-0.0101845	-0.0221206	0.0205154	0.0220168	-0.0141821	0.115741	0.0117103
HCD2_HUMAN	0.139712	-0.226836	0.24162	0.0724522	-0.0771552	-0.0701553	-0.103882	-0.158509
HCDH_HUMAN	-0.00854589	-0.122976	0.0683331	0.0458032	-0.013064	-0.0542728	0.0446051	-0.0444549
HCFC1_HUMAN	-0.0526178	-0.0270481	-0.130472	0.174852	-0.140771	0.0781972	-0.171145	0.209918
HCLS1_HUMAN	0.32137	0.0150559	0.082073	0.358522	-0.229867	-0.100081	0.027181	-0.141257
HD_HUMAN	0.0243116	0.0217447	-0.0626156	0.055085	-0.10662	0.041322	-0.0165158	0.0508255
HDAC2_HUMAN	0.000227029	0.294345	-0.0305839	-0.0974025	-0.0190992	-0.0143136	0.0431794	0.0365904
HDAC3_HUMAN	0.0267027	-0.267922	-0.0684993	0.203401	0.0432832	-0.0558972	-0.0267027	0.0973417
HDAC6_HUMAN	-0.0173938	0.0852537	-0.0344299	0.196927	0.102206	-0.345337	-0.120199	0.0062471
HDC_HUMAN	0.0293476	-0.188917	-0.929236	0.453359	0.136209	-0.103343	-0.51409	0.0618267
HDDC2_HUMAN	0.0450562	0.0142361	0.0945525	0.131996	-0.0353348	-0.0190321	-0.142897	0.10701
HDGF_HUMAN	-0.0338442	-0.0864142	-0.0723947	0.000292158	0.0723947	0.0513002	0.0810024	0.0352192
HDGL1_HUMAN	0.0428456	-0.0976266	-0.2396	-0.0422579	0.0752336	-0.111982	0.535488	0.0422579
HDGR2_HUMAN	-0.0639085	-0.196171	-0.137736	-0.0207643	0.0409085	0.254711	-0.198612	0.0371203
HDGR3_HUMAN	0.249896	0.0603739	-0.125056	0.0171595	-0.0833385	0.355975	-0.0171595	0.527525
HDHD1_HUMAN	-0.0605549	-0.00769125	0.26664	-0.206486	0.0744965	-0.0234772	0.0320064	-0.148854
HDHD2_HUMAN	0.01926	0.00977388	-0.00430266	-0.0550963	0.112995	-0.0448365	0.00761665	0.019734
HDHD3_HUMAN	0.14	-0.0335368	0.256408	0.0133655	0.0422318	-0.119139	-0.113207	-0.0672367
HDHD5_HUMAN	0.150003	-0.0380146	0.161894	0.0866316	-0.00701821	-0.0852435	0.000572654	-0.111651
HEAT3_HUMAN	-0.174893	0.0781592	-0.465187	-0.35149	0.0660145	0.156951	0.0480152	-0.0480152
HEBP1_HUMAN	0.0874395	0.00293828	0.162043	0.19777	-0.264086	-0.253687	-0.167762	-0.0226897
HEBP2_HUMAN	0.0266263	-0.0586392	-0.0868465	0.055703	0.195632	-0.454123	0.143494	0.0869448
HECD1_HUMAN	0.0348632	-0.0744236	0.0236408	0.0155118	0.014026	0.0301687	-0.106335	0.00574185
HECD3_HUMAN	0.0821862	0.0609631	0.224158	-0.0262194	-0.132445	-0.0542637	-0.264736	-0.0299412
HELZ_HUMAN	0.051015	-0.187106	-0.114522	-0.0914174	0.0969508	0.0043773	-0.0043773	0.69624
HEM1_HUMAN	-0.220701	0.0353726	0.0111103	-0.0111103	-0.167062	-0.0334887	0.179702	0.081827
HEM2_HUMAN	0.0837601	-0.117772	0.428209	0.224945	-0.294537	-0.286748	-0.347539	0.12945
HEM3_HUMAN	0.0518523	-0.0510733	0.244415	0.127575	-0.218294	-0.365281	-0.215169	0.11595
HEM4_HUMAN	0.142698	-0.0251586	0.00932967	0.0744337	0.257994	-0.204424	-0.209953	-0.0454829
HEM6_HUMAN	0.0445362	-0.160133	0.00913267	0.00546512	-0.00437689	-0.206017	-0.0112031	-0.0572013
HEMH_HUMAN	-0.02206	-0.0536039	0.119588	-0.018225	-0.0742789	-0.0492348	0.0482655	-0.00654452
HEMK2_HUMAN	0.101682	0.205088	-0.0161845	0.256677	-0.724093	-0.347816	-0.0803354	0.0161845
HEMO_HUMAN	0.28646	0.551316	-0.216176	-0.0847212	0.0615851	-0.286084	0.095281	0.784325
HEP2_HUMAN	0.43613	0.728431	-0.172527	0.037175	-0.225601	-0.0937625	-0.134793	0.728792
HERC1_HUMAN	-0.0343833	0.00880193	-0.0121042	0.027111	0.186939	0.00761281	0.206151	-0.137682
HERC2_HUMAN	0.210672	0.356704	0.341066	0.0901597	-0.552136	-0.201817	-0.414153	0.443386
HERC4_HUMAN	-0.0116922	-0.039048	-0.0234348	0.0534836	0.0673794	-0.0878106	0.085741	-0.0720583
HEXA_HUMAN	0.166993	-0.0192952	-0.0833565	0.148297	0.0448941	-0.053929	-0.10756	0.115237
HEXB_HUMAN	0.286115	-0.0182538	-0.0676044	0.110148	0.0670415	-0.0575756	-0.0307529	-0.0305446
HEXDC_HUMAN	0.117129	-0.131016	-0.134272	0.367361	-0.0500836	-0.171653	0.0129957	-0.237665
HG2A_HUMAN	0.383505	-0.0312323	0.0312323	0.244922	-1.04857	-0.222623	-0.203445	0.438499
HGFA_HUMAN	-0.0716663	0.420248	-0.253738	-0.489249	-0.120527	0.0716663	0.102794	0.516087
HGH1_HUMAN	0.04529	0.123572	-0.0523955	-0.0548349	-0.0207959	-0.0988289	0.028418	0.0705423
HGS_HUMAN	-0.0375673	-0.0787954	0.0314408	-0.031271	0.259865	-0.0174624	-0.131794	-0.15971
HHATL_HUMAN	0.00656578	0.00641131	-0.111154	-0.004625	-0.0309017	-0.111381	0.10223	-0.00641131
HIBCH_HUMAN	0.373673	0.0231686	0.155387	-0.0592769	0.0161381	-0.311642	-0.143243	-0.262851
HIF1N_HUMAN	0.0779091	0.0756454	-0.00921516	-0.0840466	0.100686	-0.104839	-0.0212048	0.0326207
HIG1A_HUMAN	-0.00269767	-0.0879823	0.317013	0.0274055	-0.174828	0.00269767	-0.0284192	-0.0892853
HIG2A_HUMAN	-0.0134681	0.0810126	0.131359	0.0543597	-0.601133	-0.0469678	0.245633	-0.642135
HIKES_HUMAN	0.0856185	-0.0757623	-0.122806	0.0194858	0.1512	0.0632022	0.0754591	-0.135978
HINT1_HUMAN	0.0104728	-0.00871676	-0.0826478	-0.023343	0.131559	-0.0444681	0.120263	0.0180942
HINT2_HUMAN	0.15007	-0.00783407	0.301722	0.157686	-0.0749529	-0.137497	-0.0525892	-0.252187
HINT3_HUMAN	0.0381638	0.0139674	0.00538918	0.108353	0.0480462	-0.163451	0.0186674	-0.060527
HIP1_HUMAN	0.298999	-0.0251206	-0.117932	-0.0896343	-0.0801305	0.156677	-0.163271	0.301907
HM13_HUMAN	0.0991694	-0.0337408	-0.233313	0.148871	-0.490681	-0.0850526	0.118519	0.208656
HMCN1_HUMAN	0.108989	-0.00688881	-0.163994	-0.298732	0.0692439	0.410285	0.0422753	0.0160373
HMCN2_HUMAN	-0.179981	0.111957	-0.22369	-0.0297106	0.0516053	-0.0210744	0.0234592	0.107532
HMCS2_HUMAN	0.0753396	0.266334	0.015149	-0.250711	1.37793	-0.381461	-0.0985522	-0.431723
HMGA1_HUMAN	-0.143046	-0.0437812	-0.0929315	-0.101181	-0.172045	0.545512	0.17745	0.166986
HMGB1_HUMAN	0.0689786	-0.0162444	-0.187438	-0.0458684	0.160106	0.0213058	0.0760395	0.0221847
HMGB2_HUMAN	0.20848	-0.060138	0.00348758	0.123627	-0.073727	0.369247	0.0607758	-0.231349
HMGCL_HUMAN	0.231832	-0.0397109	0.263759	-0.0435673	-0.0495654	-0.109819	-0.179641	-0.0245573
HMGN5_HUMAN	-0.0899204	0.258798	-0.0478607	-0.0432833	-0.0636113	-0.151978	0.107861	-0.00333637
HMHA1_HUMAN	-0.0866069	0.0129051	0.113371	-0.0129051	0.106904	0.0836141	-0.661649	-0.364295
HMOX1_HUMAN	0.0919679	0.824857	0.0720647	-0.105399	-0.0389213	-0.296171	0.102369	-0.372867
HMOX2_HUMAN	0.0140425	0.00642605	0.0544985	-0.00495466	-0.148034	-0.0175021	-0.256755	0.15214
HNMT_HUMAN	0.505597	-0.0932761	0.0932761	0.122329	0.00628215	-0.00628215	-0.160286	0.392435
HNRDL_HUMAN	-0.0453571	-0.0108798	-0.0588853	-0.0714967	0.107937	0.0515639	0.00206545	0.0571098
HNRH1_HUMAN	-0.000905656	-0.0233633	-0.0356682	-0.133728	-0.0168238	0.0503642	0.0104805	0.128958
HNRH2_HUMAN	-0.0452506	-0.00623799	-0.0377027	-0.0915299	0.0345275	0.109836	0.0155191	0.132652
HNRH3_HUMAN	0.0138141	0.0433432	0.0549682	-0.0487692	-0.0451457	0.0360278	0.0306957	0.0460828
[truncated: 4,178 more rows]

## Sheet: MA-NA_BatchNormalizedTMT_2
TMT Batch2- batch normalized log2 protein intensities
Protein Name	MasterAlthlete	MasterAlthlete	MasterAlthlete	MasterAlthlete	NonAthlete	NonAthlete	NonAthlete	NonAthlete
1433B_HUMAN	0.033127	-0.0586969	0.0114991	0.0650778	-0.0202631	-0.00246952	-0.0808866	0.024617
1433E_HUMAN	-0.00277363	-0.0140328	-0.0604481	0.00811619	-0.0828487	0.0792869	0.00645402	0.163114
1433F_HUMAN	-0.0423062	-0.00694886	-0.148939	-0.00639783	-0.011087	0.184505	-0.0236945	0.153498
1433G_HUMAN	0.0354805	-0.0635968	-0.0343562	0.0641677	-0.209479	0.104759	-0.0527677	0.0997337
1433T_HUMAN	0.0418196	0.210969	-0.184736	0.0184311	0.155048	0.0200348	-0.171545	0.0722149
1433Z_HUMAN	0.00274079	0.0324476	-0.102757	-0.0715873	0.195708	0.0696499	-0.0432198	0.0656525
1A02_HUMAN	0.044451	-0.162007	-0.173577	0.65817	-0.269732	-0.638237	0.0974546	0.575292
1A03_HUMAN	NA	NA	NA	NA	NA	NA	NA	NA
2A5A_HUMAN	0.129378	-0.107822	-0.11564	0.0352369	-0.180183	0.205634	-0.115739	0.0715348
2A5D_HUMAN	0.0169244	-0.0812875	0.0396796	-0.00457238	-0.00218895	-0.0163894	-0.0656502	0.00571431
2A5E_HUMAN	0.00243283	-0.125654	0.052395	-0.0294201	-0.257574	0.0670729	-0.00243283	0.0170927
2A5G_HUMAN	0.0149779	-0.0041894	0.00368981	-0.00833818	-0.102034	0.220445	-0.00368981	0.135409
2AAA_HUMAN	0.0190702	-0.0717853	0.0122427	-0.0254999	-0.0460711	0.0358176	-0.0532235	0.0776992
2AAB_HUMAN	NA	NA	NA	NA	NA	NA	NA	NA
2ABA_HUMAN	-0.00573608	-0.0659584	0.0465445	0.103821	-0.187515	-0.00133994	-0.0138499	0.120823
2B14_HUMAN	0.0458567	1.53981	-0.0699521	2.04332	-0.392922	0.00632996	-0.00632996	-0.0980207
2B17_HUMAN	NA	NA	NA	NA	NA	NA	NA	NA
3BP5L_HUMAN	NA	NA	NA	NA	NA	NA	NA	NA
3HIDH_HUMAN	0.0633614	-0.422711	0.0696194	0.222227	-0.307261	-0.113686	0.11286	-0.0173987
3MG_HUMAN	NA	NA	NA	NA	NA	NA	NA	NA
41_HUMAN	0.313475	0.202578	-0.276613	-0.273328	1.25778	-0.0610964	0.102384	-0.372666
4EBP2_HUMAN	NA	NA	NA	NA	NA	NA	NA	NA
4ET_HUMAN	-0.2321	0.241471	0.281853	-0.335164	0.543262	-0.405154	-0.305266	0.361995
5NT1A_HUMAN	-0.12139	-0.135081	0.327747	-0.0165468	0.00121146	0.0253851	0.0264467	-0.0144411
5NT3A_HUMAN	0.0925521	-0.150967	0.225539	0.0103298	-0.109915	-0.114103	0.0374093	0.000307192
5NT3B_HUMAN	-0.677747	0.0642595	-0.0642595	0.380086	0.389736	-1.37112	-1.17829	0.139369
5NTC_HUMAN	-0.0262485	-0.0520153	0.0620063	-0.000562205	-0.254276	-0.0144795	-0.105522	0.330809
5NTD_HUMAN	-0.222227	0.504595	-0.252955	0.215088	0.544607	-0.0582415	-0.0995876	-0.0918839
6PGD_HUMAN	0.253715	-0.0163167	-0.0153712	0.00119475	0.316209	-0.115978	-0.0028109	-0.0939661
6PGL_HUMAN	0.00383161	-0.00959828	-0.0249748	0.00289082	0.0231323	0.069644	-0.155784	-0.00383161
8ODP_HUMAN	0.0411062	0.0661625	-0.171408	0.107332	0.368348	0.0834694	-0.0563799	-0.0345401
A16A1_HUMAN	-0.168441	0.27082	-0.0125455	-0.0232969	0.104436	-0.105252	0.0340358	-0.0822036
A16L1_HUMAN	0.0277928	-0.0331626	-0.302962	0.0547829	-0.0769155	0.243018	-0.0618141	0.250993
A1AG1_HUMAN	0.501076	-0.0461194	-0.503358	-0.0191721	-0.0338846	0.334494	-0.227279	0.218783
A1AG2_HUMAN	0.674998	-0.0176289	-0.411819	0.0220504	0.0900962	0.35683	-0.307941	0.123387
A1AT_HUMAN	0.631931	-0.00569304	-0.271601	-0.0697729	-0.143124	0.154908	-0.00914588	-0.0606746
A1BG_HUMAN	0.272355	-0.0692676	-0.125973	-0.00114911	-0.019912	0.105947	-0.0453028	-0.0720795
A2AP_HUMAN	0.634766	0.191514	-0.362347	-0.190012	1.51141	-0.182086	-0.094204	-0.241467
A2GL_HUMAN	0.499515	0.0347275	-0.3889	-0.00589124	-0.0149693	0.26345	-0.0789827	-0.0245485
A2MG_HUMAN	0.551343	-0.0214387	-0.376869	-0.172848	-0.11051	0.118642	0.0656644	-0.483886
AAAS_HUMAN	-0.124611	-0.0400512	-0.0238167	0.0120231	0.00826578	0.119828	-0.0725804	0.349378
AACT_HUMAN	0.539629	0.0617251	-0.381558	-0.0418544	0.07379	0.0370585	-0.174667	-0.133211
AAK1_HUMAN	-0.0814144	0.0814144	-0.0818319	0.00104708	0.10999	0.0901731	-0.130727	0.0347867
AAKB1_HUMAN	NA	NA	NA	NA	NA	NA	NA	NA
AAKB2_HUMAN	-0.123075	-0.025465	0.0797161	0.0338309	-0.316136	0.0603532	0.00389107	-0.100126
AAKG1_HUMAN	0.0200708	-0.0248661	-0.117365	0.136012	-0.00983652	0.0394587	-0.0342246	-0.0801115
AAKG2_HUMAN	0.108596	0.16208	0.34606	0.0549989	-0.109165	-0.320486	-0.45407	-0.0215628
AAKG3_HUMAN	0.0194149	0.208497	-0.030893	-0.0519597	0.0891503	-0.00131927	-0.0447275	-0.136467
AAMDC_HUMAN	0.226771	-0.180615	0.18805	0.105799	0.0285492	-0.0931532	0.23132	-0.247092
AAPK1_HUMAN	-0.269793	0.212747	0.0687414	-0.105675	0.0538397	0.0544451	-0.0284475	-0.0209729
AAPK2_HUMAN	0.0208566	-0.0378641	0.0301004	0.0470605	-0.141134	-0.0477205	-0.0168189	0.00748617
AAR2_HUMAN	0.0165232	-0.116501	-0.0165232	0.270421	-0.153934	-0.00567898	0.0154192	0.00567898
AASD1_HUMAN	0.00612207	-0.105311	0.0614259	-0.0215754	-0.0376902	0.058121	-0.0462841	0.0800964
AASS_HUMAN	0.0568959	-0.108149	0.449196	0.149454	-0.454662	-0.189843	-0.178694	0.0952632
AATC_HUMAN	0.00573359	-0.329186	0.107771	0.219196	-0.338171	-0.148635	-0.0437827	0.111776
AATF_HUMAN	NA	NA	NA	NA	NA	NA	NA	NA
AATM_HUMAN	-0.0626928	-0.329221	0.377759	0.272197	-0.338406	-0.251319	0.136436	0.0203169
ABCA5_HUMAN	-0.319171	-0.0414397	-0.00618741	-0.156192	0.132996	0.133767	-0.00310287	0.132864
ABCA6_HUMAN	-0.173744	0.0735515	0.22227	-0.0581025	0.165099	0.087045	-0.0741286	-0.168059
ABCA8_HUMAN	-0.2964	0.447775	-0.0657593	0.704513	0.175024	-0.0581229	-0.0991123	0.105299
ABCB6_HUMAN	-0.0363661	0.0559238	-0.0345826	-0.0325439	0.281762	0.118098	0.114955	-0.101853
ABCB7_HUMAN	0.00028016	0.00403411	0.33117	0.267689	0.0161625	-0.211144	-0.0798902	-0.0202384
ABCB8_HUMAN	0.185259	-0.0381395	0.601511	0.0381395	-0.178587	-0.185802	-0.0417042	0.197441
ABCBA_HUMAN	0.034247	-0.0613196	0.172207	0.0457436	-0.0386645	-0.319707	-0.0459951	0.0247392
ABCBB_HUMAN	NA	NA	NA	NA	NA	NA	NA	NA
ABCC9_HUMAN	-0.0400776	0.0184028	0.024358	0.0248242	-0.105029	0.0202681	0.0660136	0.0149192
ABCD1_HUMAN	0.587441	-0.134476	0.299259	-0.357955	0.134476	-0.155723	-0.601191	0.438627
ABCD3_HUMAN	-0.0472163	-0.032489	0.0444348	0.0509535	-0.0427484	-0.0159051	-0.0109242	-0.00998973
ABCE1_HUMAN	0.00815514	-0.079021	0.0445226	0.0045175	-0.0728435	0.0331221	-0.151861	0.0518385
ABCF1_HUMAN	-0.103009	-0.0179133	0.00263796	0.012633	-0.0358996	0.107233	0.00811861	0.0178568
ABCF2_HUMAN	-0.000665256	0.00033821	0.00535705	-0.0480219	-0.0999661	0.136638	-0.0665128	0.0646629
ABCF3_HUMAN	-0.0918738	-0.0562316	0.0197442	0.0343895	-0.174823	0.00660457	-0.0217012	0.0847858
ABD12_HUMAN	NA	NA	NA	NA	NA	NA	NA	NA
ABEC2_HUMAN	0.010617	-0.0520749	-0.150096	0.0139179	-0.040817	-0.0758137	0.034091	0.201202
ABHD4_HUMAN	NA	NA	NA	NA	NA	NA	NA	NA
ABHD5_HUMAN	-0.252085	-0.197664	0.0503002	0.294716	-0.0806057	0.0464088	-0.195863	0.0338344
ABHDA_HUMAN	-0.00988789	-0.219488	0.241984	0.167597	-0.232219	-0.178316	0.0878383	0.103107
ABHDB_HUMAN	0.0646775	-0.0747959	0.0449738	0.084153	-0.0581242	-0.178018	0.0707356	0.03438
ABHEB_HUMAN	0.0850805	-0.106321	-0.00121067	-0.137638	0.0360522	0.0170333	-0.14063	0.0165878
ABHGA_HUMAN	0.0598573	-0.0455322	-0.000222398	0.0527336	0.0441159	-0.115051	0.0080304	-0.0135467
ABI1_HUMAN	-0.137359	-0.0169842	0.0534015	-0.0028298	-0.257661	0.188937	-0.0578218	-0.0431669
ABI3_HUMAN	NA	NA	NA	NA	NA	NA	NA	NA
ABL1_HUMAN	-0.0982565	0.181242	-0.014767	-0.23461	0.0440755	-0.066167	-0.0290744	0.0725582
ABLM1_HUMAN	-0.106689	0.822966	0.0543062	-0.154547	-0.113992	0.946639	-0.0347657	0.186266
ABLM2_HUMAN	-0.079701	-0.041762	-0.0145974	-0.00988396	0.000477983	0.20387	0.0748819	0.0746096
ABLM3_HUMAN	-0.163635	0.0119321	0.00252852	0.0971095	-0.0264713	-0.0877087	0.120446	0.0252785
ABR_HUMAN	-0.0143157	0.0968107	0.0702822	-0.0069763	-0.21743	0.0455314	-0.16167	0.154499
ABRA_HUMAN	-0.0604723	0.148322	0.0173463	0.0893007	-0.135607	-0.145543	-0.0238403	0.246573
ABRX2_HUMAN	-0.159814	0.00125838	-0.0218151	0.0631778	-0.169158	0.0942113	0.0218151	0.00587409
ABTB2_HUMAN	-0.303641	0.43615	-0.588631	0.66685	0.758814	0.0803886	-0.306827	-0.0486614
ACACB_HUMAN	0.0413749	-0.0815897	-0.0317307	0.0237131	-0.228169	-0.0688161	-0.112657	0.120547
ACAD8_HUMAN	-0.383667	-0.101516	0.187997	0.308845	-0.24299	-0.11331	0.0708439	0.0802745
ACAD9_HUMAN	0.0887823	-0.108378	0.114344	0.149462	-0.180678	-0.0794824	-0.125452	0.186697
ACADL_HUMAN	-0.0709323	0.299357	-0.541942	0.211859	-0.256097	-0.353457	-0.0963127	0.0706869
ACADM_HUMAN	-0.0194109	-0.241485	0.0237423	0.423002	-0.160811	-0.228876	-0.019899	0.0381154
ACADS_HUMAN	0.0898889	-0.191106	0.228874	0.00830404	-0.0252811	-0.247831	-0.21511	0.148527
ACADV_HUMAN	0.00243303	-0.198318	0.0579326	0.201956	-0.246656	-0.210225	0.101822	0.0653617
ACAP2_HUMAN	0.340345	0.299885	0.0136067	-0.0136067	0.380584	-0.168464	-0.271587	-0.0676889
ACBD5_HUMAN	-0.0485509	-0.149524	0.117286	-0.0424843	0.0261609	-0.109641	0.227502	-0.0261609
ACBD6_HUMAN	NA	NA	NA	NA	NA	NA	NA	NA
ACBP_HUMAN	0.10568	-0.00459152	-0.0524333	0.0522713	-0.145331	-0.0576756	-0.30355	0.217434
ACD10_HUMAN	-0.688664	-0.154796	0.0445632	0.196875	-0.0650554	0.203303	0.0551135	0.231939
ACDSB_HUMAN	0.00967069	-0.159924	0.131649	0.130332	-0.270975	-0.122564	0.0638801	-0.0315253
ACE_HUMAN	-0.137801	0.0516315	0.0387047	0.0609901	-0.027021	-0.16957	-0.134605	0.0621407
ACES_HUMAN	-0.0113091	0.00206031	0.14247	-0.0416717	-0.00386871	0.0378646	-0.0281455	-0.00206031
ACINU_HUMAN	-0.118039	0.164675	-0.0160905	-0.0167948	0.0589048	0.0750301	0.00137266	0.0477705
ACL6A_HUMAN	-0.122328	0.0777999	-0.0883104	-0.035087	0.191935	0.0980295	0.0425775	0.0279168
ACLY_HUMAN	0.201218	0.185477	-0.180552	-0.0665511	0.709193	-0.0708965	-0.0130331	-0.190213
ACO11_HUMAN	-0.0441533	-0.388763	-1.0088	1.45629	-0.375076	-0.0921795	0.806745	0.0441533
ACO13_HUMAN	-0.00517761	-0.207694	0.0681926	0.208954	-0.350543	-0.155021	0.133977	-0.00595358
ACOC_HUMAN	-0.00324903	-0.139572	0.155291	0.116364	-0.238404	-0.146086	-0.100794	0.00324903
ACON_HUMAN	-0.0278948	-0.201178	0.143307	0.210973	-0.235351	-0.212649	0.105059	0.0290653
ACOT1_HUMAN	-0.00951885	-0.254697	0.0120131	-0.127833	-0.118148	0.0248368	-0.138283	0.222713
ACOT2_HUMAN	0.00811238	-0.0213737	0.576776	-0.0497944	-0.0746918	-0.0530281	0.000285436	-0.0240266
ACOT8_HUMAN	0.0787025	0.0524917	0.0847737	-0.127527	-0.0050488	0.0050488	-0.0409029	-0.121492
ACOT9_HUMAN	-0.0322148	-0.0887636	-0.00318629	0.109258	-0.199126	-0.00187928	-0.00472165	0.133079
ACOX1_HUMAN	-0.0626606	-0.0264942	0.09539	-0.0082334	-0.0439669	0.0561363	-0.112409	-0.0666804
ACOX2_HUMAN	NA	NA	NA	NA	NA	NA	NA	NA
ACOX3_HUMAN	NA	NA	NA	NA	NA	NA	NA	NA
ACPH_HUMAN	0.0711301	-0.0411655	0.0375169	-0.0115744	0.00881785	-0.0486328	-0.0525924	-0.00684268
ACPM_HUMAN	-0.0819878	-0.370664	0.185121	0.0996057	-0.294751	-0.391257	0.108462	0.0506261
ACS2L_HUMAN	-0.168226	-0.0453633	0.0808171	0.0864801	-0.256828	0.0119364	-0.11612	0.18462
ACSA_HUMAN	0.0200603	-0.0868454	0.108403	0.0396722	-0.219383	0.113821	-0.0638259	0.134926
ACSF2_HUMAN	0.00409659	-0.218461	0.169872	0.0540338	-0.0133238	-0.109601	0.0179555	0.103741
ACSF3_HUMAN	0.109424	-0.0583395	-0.00118866	0.29839	-0.185784	-0.0398803	0.0499976	-0.0159117
ACSL1_HUMAN	0.032639	-0.208123	0.0949472	0.204881	-0.25117	-0.298853	-0.0119131	-0.00451013
ACSL3_HUMAN	-0.00302112	0.107636	-0.0857389	0.027668	-0.020114	0.362867	-0.0188379	-0.0742725
ACSL4_HUMAN	-0.163118	0.184987	-0.0581133	-0.00211354	0.111997	0.00790292	0.041064	0.0120157
ACSL5_HUMAN	NA	NA	NA	NA	NA	NA	NA	NA
ACSL6_HUMAN	NA	NA	NA	NA	NA	NA	NA	NA
ACSS3_HUMAN	0.0462387	-0.258402	0.18091	0.0602881	-0.0124841	-0.0472911	0.0295037	-0.0766987
ACTA_HUMAN	NA	NA	NA	NA	NA	NA	NA	NA
ACTB_HUMAN	-0.0595147	0.153502	-0.0625153	0.120998	0.502673	-0.099644	-0.0340853	0.01276
ACTBL_HUMAN	-0.077377	0.0685176	0.149275	-0.0154808	-0.0101924	0.0633227	-0.00306868	-0.0468224
ACTBM_HUMAN	0.0157963	0.0223873	-0.0709402	0.272822	-0.120018	0.411148	-0.0364431	-0.0362231
ACTG_HUMAN	-0.0985604	0.232372	-0.203859	0.0858219	0.459737	0.0353032	-0.244051	0.0187879
ACTN1_HUMAN	0.0100978	0.0516221	-0.0784281	-0.0116239	0.00216822	-0.0105869	0.0158757	0.0870658
ACTN2_HUMAN	-0.00891181	-0.0814518	-0.0045791	0.0430985	-0.234154	-0.0161979	0.0213728	0.1268
ACTN3_HUMAN	0.194377	0.62908	0.151577	-0.13664	0.888173	0.489563	-0.298175	-0.45661
ACTN4_HUMAN	-0.0332266	0.505587	-0.00830999	0.0155297	0.248524	-0.0940542	-0.0864259	-0.00620129
ACTS_HUMAN	-0.0232713	-0.0365066	0.07676	0.00665036	-0.158246	-0.00731761	0.0176249	0.03277
ACTY_HUMAN	-0.0255094	0.00454747	0.0106843	-0.0321245	0.122177	0.184328	-0.0720858	-0.0445789
ACTZ_HUMAN	-0.0881236	0.0563133	0.070029	-0.0423247	-0.00224688	0.0423247	-0.000542731	0.0180992
ACV1C_HUMAN	NA	NA	NA	NA	NA	NA	NA	NA
ACY1_HUMAN	-0.050775	-0.0544231	0.222823	0.0291835	-0.0886584	-0.022253	-0.109261	0.0137457
ACY2_HUMAN	0.0288357	-0.103868	0.0746424	0.23902	-0.00839344	-0.0466999	-0.0590248	-0.0201867
ACYP1_HUMAN	0.282378	0.00228241	-0.0637261	-0.00619473	0.315639	0.0709469	-0.0551714	-0.129451
ACYP2_HUMAN	0.143427	-0.119873	-0.0190793	0.00905782	-0.264459	0.199459	-0.134146	0.059292
ADA_HUMAN	-0.0344944	-0.143075	0.0191413	0.0777517	0.00441297	0.0362451	-0.0798483	0.0275639
ADA10_HUMAN	-0.0119926	0.0119926	-0.339509	0.168629	0.233128	0.132096	-0.190083	-0.119123
ADAL_HUMAN	0.0311984	-0.121531	0.0804428	-0.0996804	-0.0816793	0.0130083	-0.123841	0.0322958
ADAM9_HUMAN	-1.35864	-0.0901751	0.142648	0.66889	-0.167196	0.286379	-0.0238164	-0.147867
ADAS_HUMAN	-0.00268783	0.0250621	0.0641399	0.0465752	-0.0339875	-0.0695765	-0.0303139	0.00849645
ADCK1_HUMAN	NA	NA	NA	NA	NA	NA	NA	NA
ADCK2_HUMAN	NA	NA	NA	NA	NA	NA	NA	NA
ADCK5_HUMAN	-0.0501576	-1.9e-05	-0.116011	-0.00375719	0.420863	1.9e-05	0.183407	0.00375719
ADCY2_HUMAN	-0.0917773	0.0715912	0.0633428	-0.0592429	-0.00794264	-0.114512	0.210658	0.0418142
ADCY6_HUMAN	NA	NA	NA	NA	NA	NA	NA	NA
ADCY9_HUMAN	0.0445503	-0.0694272	0.127753	-0.0558098	-0.0778675	-0.0386518	-0.0436884	0.126433
ADDA_HUMAN	0.193313	0.297077	-0.0933535	-0.0584501	0.81145	-0.0245524	-0.060228	-0.370577
ADDB_HUMAN	0.220106	0.131181	-0.264019	-0.243692	1.11388	-0.0678175	0.0616067	-0.325488
ADDG_HUMAN	-0.000850396	0.188386	-0.193529	0.115149	0.243525	0.0554852	-0.0554852	-0.232239
ADH1B_HUMAN	0.210054	-0.0330047	-0.347546	0.594209	-0.179426	-0.0542159	-0.18178	0.302461
ADH1G_HUMAN	-0.0241551	-0.0685514	0.193693	0.181358	-0.072631	0.467066	-0.234207	0.224508
ADHX_HUMAN	0.150219	-0.134717	-0.169728	0.0343243	-0.153904	0.32373	-0.0123681	0.00450096
ADIPO_HUMAN	0.0786448	-0.00975091	-0.139625	0.0401152	-0.140287	0.0986548	-0.0340506	0.0123544
ADIRF_HUMAN	-0.178018	0.109289	0.0422668	-0.0477718	0.208063	-0.0854122	-0.224084	0.076362
ADK_HUMAN	0.0603406	-0.0340317	-0.0977234	-0.0148338	-0.00494262	0.0849034	0.0416537	-0.0146985
ADPPT_HUMAN	0.206527	-0.0479559	-0.0104587	0.00212195	-0.10739	0.0314203	-0.0748813	0.00387904
ADPRH_HUMAN	0.0496471	-0.0893054	0.0953574	0.0274881	-0.132511	0.114842	0.0228205	0.042476
ADRM1_HUMAN	-0.00346272	-0.0121441	-0.0600858	0.0211533	-0.263048	-0.0571106	0.0451538	0.0237972
ADRO_HUMAN	0.0862608	-0.177898	0.154447	0.00884665	0.074217	0.823196	-0.175262	0.0733273
ADT1_HUMAN	0.0130421	-0.391067	0.339083	0.196851	-0.513991	-0.433631	0.11387	-0.0193207
ADT2_HUMAN	-0.0408807	0.0165682	-0.00575997	0.105886	0.0408807	-0.216332	0.0234435	0.0532086
ADT3_HUMAN	-0.0817278	-0.0226938	0.310273	0.0757448	-0.143601	-0.24637	0.0653748	0.0226938
ADX_HUMAN	0.119227	-0.0427822	0.0794822	-0.00430445	0.198162	-0.584643	-0.076667	-0.120405
AEBP1_HUMAN	-0.216217	0.424544	0.0794209	0.00018024	0.215702	-0.00018024	0.0260892	-0.0913896
AEDO_HUMAN	-0.026646	-0.0406155	0.0935359	-0.0849743	0.436495	0.0631628	0.22117	-0.0366386
AES_HUMAN	-0.0188881	0.230684	0.0686033	-0.212668	0.0302385	0.0188881	0.0264902	-0.163532
AFAD_HUMAN	-0.143995	0.153665	0.324691	0.124223	-0.166971	0.16189	-0.0117645	0.0117645
AFAM_HUMAN	0.634127	0.0398606	-0.255752	-0.0339687	-0.135059	0.0172523	-0.0166118	-0.29789
AFG1L_HUMAN	0.0896757	-0.106456	0.163848	0.0984677	-0.670849	-0.316509	0.130541	-0.0896757
AFG32_HUMAN	-0.0060352	-0.149211	0.123441	0.161758	-0.264704	-0.182261	0.0335855	0.0162288
AGAL_HUMAN	-0.180453	-0.15852	0.0730151	0.0708868	-0.195531	-0.409653	0.0675094	0.604235
AGAP3_HUMAN	0.109935	0.0978092	-0.261896	-0.0978092	-0.462527	-0.871337	0.12854	0.178927
AGFG1_HUMAN	-0.0421656	-0.054072	-0.00600358	0.0261327	0.212856	0.0769476	-0.0407563	-0.0224787
AGK_HUMAN	-0.0613136	0.00528986	0.106462	0.0805366	-0.0469041	-0.0803822	0.0266091	-0.0791608
AGM1_HUMAN	-0.00954988	0.0517567	-0.0182653	0.0111895	-0.205799	0.0368471	-0.0713958	0.066343
AGO1_HUMAN	-0.0710109	0.130081	-0.0249017	-0.0251696	0.00217426	-0.0197727	0.0263541	0.117949
AGO2_HUMAN	0.0533521	0.0216426	-0.179114	0.00285893	0.326291	-0.0117492	0.0122366	-0.0122366
AGO3_HUMAN	-0.0367412	0.0266622	-0.0524475	0.0174352	0.0228179	0.0320882	0.0348619	-0.004639
AGO4_HUMAN	-0.657739	-0.165872	-0.402472	0.0656427	0.643296	0.00753941	0.105392	-0.0185366
AGRIN_HUMAN	-0.277969	0.149934	-0.0359026	0.0585985	0.189651	-0.00621988	-0.111848	0.0677534
AHNK_HUMAN	-0.0397504	0.22658	-0.0983595	0.0377145	-0.0542145	0.226342	0.0122578	-0.0517529
AHNK2_HUMAN	0.0640074	0.744264	-0.144029	0.337422	0.2297	-0.0683155	-0.207526	-0.0773177
AHSA1_HUMAN	0.0705818	-0.0717591	-0.00231125	0.00648949	-0.0403448	0.150841	-0.0960579	0.062716
AHSP_HUMAN	0.334657	0.0140537	-0.438375	-0.233268	1.13438	0.390485	-0.0538525	-0.616392
AIDA_HUMAN	-0.251796	0.0257424	-0.272179	-0.0619776	0.0262293	0.140023	-0.0782728	0.102378
AIF1_HUMAN	-0.413958	-0.153718	-0.181544	0.140027	0.564599	0.22531	-0.0458242	-0.18112
AIF1L_HUMAN	-0.0916659	-0.0176418	0.36336	0.0176418	0.0728493	-0.0661509	-0.285434	0.235589
AIFM1_HUMAN	0.0173913	-0.201603	0.169084	0.175033	-0.203859	-0.164254	0.0656036	-0.0376482
AIFM2_HUMAN	NA	NA	NA	NA	NA	NA	NA	NA
AIMP1_HUMAN	0.0179796	-0.0723499	0.010084	-0.000506911	-0.0653483	0.139967	-0.0123965	0.0658152
AIMP2_HUMAN	-0.0645916	-0.0268794	0.0118866	-0.00137031	-0.0629795	0.0814514	0.00751934	0.15323
AIP_HUMAN	-0.010444	0.0047505	0.0687126	0.000412965	-0.0217572	0.125954	-0.0234079	0.0335457
AK1A1_HUMAN	0.0413303	0.104171	-0.0160721	-0.00816455	0.117664	0.258736	-0.10722	-0.126319
AK1BF_HUMAN	0.50673	-0.0233821	0.0233821	0.191419	-0.257065	-0.159326	-0.298988	-0.124104
AK1C1_HUMAN	-0.0132223	0.0394347	0.0132223	0.0643127	-0.423205	0.281498	-0.480993	0.141441
AK1C2_HUMAN	0.161327	0.455224	-0.161327	-0.444904	0.764479	0.13054	-0.250312	0.345035
AK1C3_HUMAN	-0.088183	0.0414223	-0.176085	-0.0609116	0.162948	0.0752588	-0.0280515	0.372784
AKA12_HUMAN	-0.0948399	0.157541	0.0425763	0.241382	0.023113	0.0199587	-0.136231	-0.0296661
AKA7G_HUMAN	0.00362901	0.0346395	0.185356	-0.0748311	-0.0157931	-0.252235	0.193063	0.138958
AKAP1_HUMAN	-0.0101742	0.0212525	0.0786008	0.00546649	-0.324179	-0.0822739	-0.0382233	0.124564
AKAP2_HUMAN	0.0116443	-0.0391349	0.0121912	0.0723163	-0.0364447	-0.00131079	-0.0609679	0.0558566
AKAP6_HUMAN	0.0153372	0.201791	-0.168838	0.175436	0.337947	-0.0661062	-0.0119365	-0.0785017
AKAP8_HUMAN	-0.0097236	-0.0216709	-0.161335	0.101832	0.0609016	0.0588898	-0.137548	-0.177701
AKAP9_HUMAN	-0.013759	0.0263528	-0.00273206	0.000506994	0.0378242	-0.000506994	-0.0155346	0.0622008
AKP13_HUMAN	-0.010489	0.110121	-0.0707003	0.0233002	0.209648	0.0378922	-0.0250653	0.0575565
AKP8L_HUMAN	-0.0038357	0.0951579	-0.0259037	-0.0968598	-0.00340797	0.0366976	0.0038357	0.00340797
AKT1_HUMAN	-0.193929	-0.0220088	0.0220088	0.252352	0.281002	-0.0617198	-0.0721182	0.0361925
AKT2_HUMAN	-0.022292	0.0607344	0.000939728	0.0366099	0.184082	0.022292	-0.0942316	-0.0243171
AKTIP_HUMAN	0.319745	0.173738	-0.146062	0.274868	-0.0776085	0.0342692	-0.0404854	0.0247432
AKTS1_HUMAN	-0.0993434	-0.0456917	-0.0886078	-0.028821	-0.279308	-0.0530573	0.028821	0.0880944
AL1A1_HUMAN	-0.0811435	-0.235429	0.0269292	0.0141692	-0.056549	0.0197434	0.013007	0.485243
AL1A2_HUMAN	0.000519017	-0.151065	0.0825914	-0.0116292	-0.0308132	0.0255063	-0.11018	0.0840118
AL1A3_HUMAN	NA	NA	NA	NA	NA	NA	NA	NA
AL1B1_HUMAN	0.0117012	-0.266626	0.232639	0.480047	-0.133196	-0.0642054	0.066582	-0.127441
AL1L1_HUMAN	0.249548	0.0506475	0.0267059	0.226434	-0.508775	-0.057126	-0.119379	-0.191805
AL1L2_HUMAN	0.000822299	-0.137628	0.138432	0.00485088	-0.56709	-0.224054	0.0188863	0.304161
AL3A2_HUMAN	0.043666	-0.00430807	-0.0926969	-0.00645332	-0.0168584	0.206111	-0.0715618	-0.0355993
AL4A1_HUMAN	0.0199481	-0.0890295	0.12071	0.112673	-0.200233	0.0366362	-0.146681	0.0442696
AL7A1_HUMAN	0.104414	-0.201828	-0.289846	0.178287	-0.196724	0.0437506	0.0231033	-0.0459728
AL9A1_HUMAN	0.0704398	0.00603122	-0.137766	-0.0609769	-0.131266	0.0446553	-0.0325507	0.0701004
ALAT1_HUMAN	0.292916	-0.0252814	0.0210522	0.101323	-0.272073	-0.0991104	-0.202264	0.135713
ALAT2_HUMAN	-0.0180669	-0.0160619	0.102785	0.0212154	-0.0946776	-0.113732	-0.101418	0.0482815
ALDH2_HUMAN	0.0516157	-0.018216	0.0104604	0.108016	-0.175942	0.0311289	0.0719817	-0.126642
ALDOA_HUMAN	0.026921	-0.0330603	-0.00635799	0.0508813	-0.137355	-0.00430664	-0.0173661	0.0459872
ALDOC_HUMAN	0.000621667	-0.0332891	0.0438215	0.000871602	-0.0808739	0.00185155	-0.0199839	0.0411967
ALDR_HUMAN	0.0194474	-0.112646	-0.0408963	0.00120745	-0.0522116	0.21087	-0.13519	0.0389799
ALG1_HUMAN	0.466989	-0.521693	-0.207906	-0.0545044	0.144157	0.148549	0.277768	-0.224948
ALG11_HUMAN	-0.370267	0.221446	-0.710296	-0.32162	0.16769	0.229465	-0.296115	-0.0203524
ALG2_HUMAN	NA	NA	NA	NA	NA	NA	NA	NA
ALG5_HUMAN	-0.0324227	0.0976935	0.112843	-0.047143	0.17926	-0.172856	-0.00477367	0.0134645
ALG9_HUMAN	-0.0270879	0.0379558	-0.111471	0.0447963	0.0931268	0.319528	0.00890515	-0.0786082
ALKB5_HUMAN	-0.035357	0.0822854	0.00583285	0.105158	-0.0652739	0.035357	0.113539	-0.0283769
ALPK2_HUMAN	-0.158779	0.337505	0.845141	0.0519503	-0.806824	-0.0519503	1.03311	0.805027
ALPK3_HUMAN	-0.0411996	-0.00344018	0.10102	0.0200524	-0.19083	0.0230295	-0.0470066	0.0713316
ALR_HUMAN	0.0714361	-0.194175	0.0679893	0.0287742	-0.160371	-0.0851456	-0.0618378	-0.011647
ALS_HUMAN	0.469976	0.304845	-0.129011	0.0856206	0.132889	-0.42845	-0.0439374	-0.193613
ALS2_HUMAN	-0.0295026	-0.0344361	0.0335202	0.142971	-0.0947658	0.0893401	-0.032691	0.0140059
AMBP_HUMAN	0.144064	0.0385917	-0.367658	-0.106845	0.0102486	0.0674654	-0.0502343	0.331719
AMFR_HUMAN	NA	NA	NA	NA	NA	NA	NA	NA
AMPB_HUMAN	-0.0256785	0.014239	0.126732	0.0835228	-0.190008	0.195328	-0.152998	0.0256785
AMPD1_HUMAN	0.0753324	-0.0278682	0.00252479	0.0457207	-0.272109	0.0525986	-0.0150341	-0.00519865
AMPD3_HUMAN	0.0798326	0.147617	0.0817714	-0.123003	-0.152732	0.124559	-0.0385265	0.433937
AMPL_HUMAN	-0.0773869	-0.0535809	0.305161	0.106187	-0.138818	0.133583	0.012764	-0.341325
AMPN_HUMAN	NA	NA	NA	NA	NA	NA	NA	NA
AMRP_HUMAN	0.00595772	-0.0558886	0.0338877	-0.0482636	-0.048309	0.0404382	-0.000997124	-0.0128271
AMZ2_HUMAN	0.120851	-0.20308	-0.0871226	0.0251027	-0.248966	0.282038	-0.211392	0.0590126
AN13A_HUMAN	NA	NA	NA	NA	NA	NA	NA	NA
AN32A_HUMAN	-0.0898818	-0.0445304	0.100694	-0.225582	-0.000801383	0.304255	0.0216203	0.367224
AN32B_HUMAN	0.00584382	-0.0190328	-0.0993002	0.0662849	0.159914	-0.0208369	-0.00584382	0.185164
AN32E_HUMAN	0.00483669	-0.0208262	-0.22209	0.0794332	0.0401297	0.0480298	-0.0047574	0.234452
ANFY1_HUMAN	0.0822087	0.150003	-0.186136	0.095039	0.17237	-0.0453913	0.00360825	-0.00323338
ANGI_HUMAN	-0.169991	-0.00833895	-0.0958788	-0.425095	0.0778172	0.0185866	-0.0148083	0.165447
ANGL2_HUMAN	-0.275074	0.579037	-0.0288203	-0.159611	0.426472	0.116334	0.0185919	0.236832
ANGT_HUMAN	0.314109	0.0873977	-0.167528	0.00452367	-0.0018271	-0.0123903	-0.088746	-0.162094
ANK1_HUMAN	0.204217	0.193691	-0.195449	-0.1637	1.30229	-0.108573	0.0556991	-0.304483
ANK2_HUMAN	0.0976026	-0.0115945	-0.00880283	0.00829796	0.0187758	-0.00873405	-0.0803612	-0.126344
ANK3_HUMAN	0.00127587	-0.0184399	-0.0725993	-0.103888	-0.0554583	0.0447636	0.0512285	0.0794914
ANKR1_HUMAN	-0.423006	0.276607	0.214602	-0.148815	-0.320459	1.49513	-0.0530245	-0.254917
ANKR2_HUMAN	-0.162462	0.14259	0.148685	-0.481869	-0.299689	0.326321	-0.253713	0.559785
ANKY2_HUMAN	-0.00596404	0.0355571	-0.0615338	0.0285273	0.316819	0.10391	-0.155376	0.0651922
ANM1_HUMAN	0.181377	0.0279368	-0.207103	0.440757	-0.212111	-0.0326149	0.00862927	-0.0807001
ANM5_HUMAN	0.0147985	-0.0455379	-0.0728904	-0.00677152	-0.0181822	0.0333502	-0.0317627	0.10009
ANM7_HUMAN	0.191894	0.0473355	0.233453	-0.0473355	0.0776983	0.156466	-0.148881	-0.130204
ANO10_HUMAN	0.058664	0.106045	0.0892855	0.00608755	0.129795	0.215562	-0.115276	-0.072538
ANO6_HUMAN	-0.159073	0.0966999	-0.0386736	-0.126143	0.0212883	0.180485	-0.197662	-0.00179079
ANR17_HUMAN	-0.791965	-0.0329533	0.167842	-0.070056	0.0329533	-0.0863947	-0.230971	0.436574
ANR23_HUMAN	-0.152136	0.0209752	-0.0055591	-0.0206771	0.221245	0.276875	-0.0378907	-0.0435118
ANR28_HUMAN	0.011299	0.0962142	-0.011299	-0.00649026	0.00649026	0.114607	-0.0832407	0.152481
ANR35_HUMAN	-0.00371945	0.0654953	-0.136295	0.0494272	-0.0588969	-0.124347	0.139051	-0.0957098
ANR39_HUMAN	-0.00554732	-0.00655909	0.526264	-1.15826	-0.0546453	0.170695	0.00554732	-0.383363
ANR44_HUMAN	NA	NA	NA	NA	NA	NA	NA	NA
ANS1A_HUMAN	NA	NA	NA	NA	NA	NA	NA	NA
ANT3_HUMAN	0.337174	0.136278	-0.288158	-0.0371901	0.329704	-0.118871	-0.0234363	-0.0950182
ANX11_HUMAN	0.0383042	-0.00503309	-0.00389763	0.0362636	-0.111808	0.0738103	-0.149478	0.0370085
ANXA1_HUMAN	0.0343852	0.237847	0.0210558	0.00903995	0.147062	-0.0266557	-0.17719	-0.0963702
ANXA2_HUMAN	-0.00362409	0.17582	-0.0909304	0.0747309	0.245225	0.00472848	-0.0200724	-0.0271652
ANXA3_HUMAN	0.119022	-0.301065	0.0134999	0.235464	-0.00118398	0.0456121	-0.0855383	0.00362173
ANXA4_HUMAN	0.103287	0.204758	-0.15557	-0.0568809	-0.0431576	0.139944	-0.205325	-0.0343754
ANXA5_HUMAN	0.32752	0.0458662	-0.196805	0.385068	-0.108904	0.129461	-0.114797	-0.0638927
ANXA6_HUMAN	0.00366572	0.0327836	-0.0609871	-0.0113426	-0.00853587	0.141475	-0.0434442	0.0296817
ANXA7_HUMAN	-0.00190548	-0.00510721	-0.0227509	0.00670382	-0.0312516	0.0875733	-0.00524013	0.0464785
AOC3_HUMAN	0.0198868	0.396672	-0.152448	-0.0110792	0.21014	-0.112915	-0.0960767	0.0554995
AOFA_HUMAN	-0.259475	0.10498	-0.0709548	0.457437	-0.0792751	-0.237034	-0.147429	0.00692716
AOFB_HUMAN	0.0369065	-0.102791	-0.0186905	0.0612552	-0.0872765	-0.120317	0.118909	-0.0104576
AOXA_HUMAN	NA	NA	NA	NA	NA	NA	NA	NA
AP1B1_HUMAN	-0.00503147	-0.032428	0.0457282	-0.00106869	0.0397799	0.00167717	-0.00500895	0.00661599
AP1G1_HUMAN	0.0179354	0.020957	-0.0582757	-0.00719883	0.0194403	0.0819785	-0.0921711	0.0239734
AP1M1_HUMAN	-0.0921621	-0.0463589	-0.0368827	-0.0880279	0.0915822	0.0368827	0.0379627	-0.0681399
AP1S2_HUMAN	NA	NA	NA	NA	NA	NA	NA	NA
AP2A1_HUMAN	0.010927	0.0820405	-0.0681794	0.00427416	0.138063	-0.0183797	-0.0455809	-0.0509743
AP2A2_HUMAN	-0.0514057	0.188436	-0.0804833	-0.0156329	0.27007	0.0403058	0.0267528	0.0155973
AP2B1_HUMAN	0.00164685	0.0182784	0.0125906	-0.0381232	0.0570722	-0.019759	-0.00443299	-0.0195104
AP2M1_HUMAN	0.00737249	0.0478972	-0.0104459	-0.0081116	0.0924314	-0.0166707	-0.00737249	-0.000638801
AP2S1_HUMAN	0.0823889	0.0162864	-0.0426177	0.258739	0.0723376	-0.580245	-0.0162864	0.600885
AP3B1_HUMAN	-0.079566	0.000694246	0.0602311	0.0603565	-0.402054	0.29727	-0.172624	0.0874358
AP3D1_HUMAN	-0.0689688	0.0971041	-0.0918165	-0.0390764	0.0703452	-0.0109728	0.0214455	0.00243402
AP3M1_HUMAN	-0.0392545	0.0894243	-0.073283	0.0153748	0.293221	-0.0153748	0.00137773	0.044775
AP4A_HUMAN	0.0421113	-0.112822	-0.0544488	0.0489001	-0.0553949	0.0016186	0.0607612	-0.275398
AP4B1_HUMAN	-0.0322947	0.00342797	0.1297	-0.0819477	-0.0108619	0.36434	-0.0621805	0.0108619
AP4E1_HUMAN	0.174581	0.0907556	0.092627	0.1088	-0.150569	-0.122626	-0.215761	-0.147457
AP4M1_HUMAN	-0.00278221	0.0115809	0.0846655	-0.159298	-0.387614	0.205497	-0.2513	-0.132546
AP4S1_HUMAN	NA	NA	NA	NA	NA	NA	NA	NA
AP5S1_HUMAN	0.104999	-0.0477728	0.194062	0.0477728	0.222452	-0.476079	-0.112777	0.0725577
AP5Z1_HUMAN	0.00277093	0.373431	-0.0435595	0.202621	-0.110797	-0.0593009	-0.0990575	-0.301806
APBB1_HUMAN	0.00472722	-0.0110512	0.512385	0.160667	-0.030021	-0.00472722	-0.504949	0.327104
APBB2_HUMAN	NA	NA	NA	NA	NA	NA	NA	NA
APC1_HUMAN	NA	NA	NA	NA	NA	NA	NA	NA
APC16_HUMAN	NA	NA	NA	NA	NA	NA	NA	NA
APC7_HUMAN	0.0522436	0.0716678	0.263628	0.0310366	0.183852	0.059942	-0.183626	-0.0673474
APEX1_HUMAN	-0.123731	0.0330654	0.00715224	0.0555955	-0.00736899	0.0603658	-0.00613266	-0.104633
API5_HUMAN	-0.134234	0.115786	-0.0798261	0.0043784	-0.0340472	0.128313	0.017723	0.0490038
APMAP_HUMAN	-0.139393	0.111245	-0.000525039	-0.133307	0.243953	0.101563	-0.0289981	-0.0200605
APOA_HUMAN	NA	NA	NA	NA	NA	NA	NA	NA
APOA1_HUMAN	0.843726	0.218694	-0.293713	-0.0796249	-0.0534998	-0.0185411	-0.0373172	-0.319832
APOA2_HUMAN	0.323868	0.471842	-0.418117	-0.144356	0.268515	-0.239918	0.00285278	-0.358191
APOA4_HUMAN	0.459673	0.00147333	-0.178762	-0.0755784	-0.114939	0.146298	-0.10154	-0.021859
APOB_HUMAN	0.650358	0.352256	-0.248022	-0.00102524	0.108507	0.0638729	-0.13926	-0.287907
APOC1_HUMAN	0.257679	0.190293	-0.746308	-0.420069	1.09194	-0.221597	0.0756932	-0.576261
APOC3_HUMAN	0.380919	0.167578	-0.473298	-0.352868	0.0605569	-0.209439	0.0310922	-0.0830844
APOD_HUMAN	0.373188	0.102892	-0.326183	0.262143	-0.373133	0.0207666	0.00536838	-0.118592
APOE_HUMAN	0.0414623	0.0875394	-0.0848385	-0.107271	0.246403	-0.0165948	0.0190362	-0.118285
APOF_HUMAN	0.861474	0.107591	-0.551907	-0.33693	-0.178893	0.0563467	-0.0572799	-0.223978
APOH_HUMAN	0.0698722	0.0398251	-0.351334	-0.171973	0.432374	-0.0122485	0.073053	-0.08315
APOL1_HUMAN	0.240956	0.298696	-0.138387	-0.276149	0.20106	0.0538322	-0.0538322	-0.117772
APOL2_HUMAN	NA	NA	NA	NA	NA	NA	NA	NA
APOM_HUMAN	-0.342207	-0.00430162	0.00796886	-0.386312	-0.0147707	0.0124806	0.0276227	0.356424
APT_HUMAN	0.0204418	0.0228536	-0.0420189	-0.130593	0.174408	0.0540838	-0.0341633	-0.0256584
APTX_HUMAN	-0.0127413	0.322129	0.0127413	-0.127997	0.498189	-0.238424	-0.0255989	0.0317597
AQP1_HUMAN	-0.147579	0.0151124	-0.0748992	0.033517	0.484167	-0.0980963	0.0745531	-0.00144594
AQP4_HUMAN	-0.2749	-0.0316515	-0.0597053	0.0162098	-0.236357	0.0156424	0.08533	-0.00606653
AQR_HUMAN	-0.0997431	-0.252188	-0.0660059	0.146588	-0.0469636	-0.256618	0.0444122	0.00124645
AR6P4_HUMAN	NA	NA	NA	NA	NA	NA	NA	NA
ARAF_HUMAN	-0.00265958	-0.0351954	0.0107101	-0.00659103	-0.180533	0.173334	-0.0214425	0.0143976
ARAP1_HUMAN	0.250942	0.112573	-0.0933339	0.105615	0.357765	0.00897799	-0.103492	-0.156281
ARBK1_HUMAN	-0.242252	-0.0366584	0.0405983	0.0387279	0.214106	0.0494188	-0.244228	-0.00393992
ARC1A_HUMAN	0.0175785	-0.0617987	0.0698141	0.00662624	-0.014067	0.162184	-0.12861	0.138243
ARC1B_HUMAN	-0.0185482	0.151936	0.0185482	0.0299174	0.332356	-0.109645	0.0260253	-0.0299174
ARCH_HUMAN	0.330108	-0.0810684	0.00315725	-0.112456	-0.133142	0.193884	-0.0918724	-0.0653608
ARF3_HUMAN	NA	NA	NA	NA	NA	NA	NA	NA
ARF4_HUMAN	-0.00138337	0.075206	-0.00407622	0.0505094	0.0423878	-0.166456	-0.104064	-0.00564165
ARF5_HUMAN	0.0184507	0.173975	0.0558128	0.0603308	0.0962659	0.0580859	-0.257802	-0.143927
ARF6_HUMAN	0.027713	-0.124536	-0.00740966	0.0566306	-0.038145	0.0512622	0.0281479	-0.167274
ARFG1_HUMAN	NA	NA	NA	NA	NA	NA	NA	NA
ARFG2_HUMAN	-0.04106	0.101765	-0.0574631	-0.0975826	0.136318	0.0757962	-0.00159017	0.0502907
ARFG3_HUMAN	0.0161621	-0.0369029	0.02667	-0.107234	0.0104112	0.0912006	-0.077101	0.0341307
ARFRP_HUMAN	-0.475597	0.0629938	-0.0629938	-0.570349	0.248772	0.168372	0.174461	0.323885
ARGAL_HUMAN	-0.128524	-0.12129	-0.127976	0.0533729	0.431961	0.223504	0.126881	-0.0519215
ARGI1_HUMAN	0.588537	0.160947	-0.201926	-0.0906483	0.694295	-0.211613	0.0113904	-0.360556
ARGI2_HUMAN	NA	NA	NA	NA	NA	NA	NA	NA
ARHG1_HUMAN	NA	NA	NA	NA	NA	NA	NA	NA
ARHG2_HUMAN	-0.0959269	0.265433	-0.0386077	-0.0332756	0.166245	0.0987875	0.0332756	-0.034017
ARHG6_HUMAN	0.309598	0.00808894	-0.145933	0.0864705	0.0156742	-0.0321389	-0.0742718	-0.00533242
ARHG7_HUMAN	-0.0972905	0.0713697	-0.0418971	0.0649271	-0.0889371	0.0825514	-0.0409787	0.0502716
ARHGA_HUMAN	NA	NA	NA	NA	NA	NA	NA	NA
ARHGB_HUMAN	-0.0819003	0.104833	0.158376	-0.11232	0.120841	0.14987	-0.0493612	0.0493612
ARHL1_HUMAN	-0.0222646	-0.00872318	0.0321509	-0.156122	-0.107514	0.352184	0.0531535	0.0546113
ARHL2_HUMAN	0.153718	-0.0845456	-0.091903	-0.0111196	-0.00213706	0.0587761	-0.150234	0.133135
ARI1_HUMAN	0.0786199	-0.0369172	-0.134571	0.0792953	-0.0977154	0.119497	0.0376184	-0.0434707
ARI1A_HUMAN	-0.0397268	0.0242815	-0.0228386	0.0177165	0.0171773	0.142579	-0.0880835	-0.00351015
ARI1B_HUMAN	NA	NA	NA	NA	NA	NA	NA	NA
ARI2_HUMAN	-0.00412684	-0.00559645	0.0135649	-0.00637963	0.0122245	0.100348	-0.188952	0.188908
ARK72_HUMAN	0.128516	-0.0234018	-0.00303918	0.00729161	-0.0553489	0.103477	-0.0409	0.0153972
ARL1_HUMAN	-0.213342	0.269781	0.139615	-0.347149	0.294082	0.227798	-0.149861	0.0707665
ARL15_HUMAN	NA	NA	NA	NA	NA	NA	NA	NA
ARL2_HUMAN	-0.0558719	-0.0187219	0.0399528	0.0932712	-0.128747	0.0821303	0.0509936	-0.0140916
ARL3_HUMAN	0.264367	-0.0418162	-0.0100946	0.082132	-0.0349122	0.021262	-0.155329	0.116262
ARL8A_HUMAN	0.0878918	0.0806579	-0.0252668	-0.0655409	0.0129288	-0.0389006	-0.0173929	0.0173929
ARL8B_HUMAN	-0.0437794	0.0528964	0.229692	-0.209952	-0.171797	0.0280812	0.0944426	0.0577762
ARLY_HUMAN	0.0494178	-0.00177212	0.0253208	0.0117137	0.192884	0.0292557	-0.151514	-0.0139965
ARM10_HUMAN	0.149407	0.0398117	0.193128	-0.157754	-0.0200536	-0.168705	0.0537432	-0.0398117
ARMC1_HUMAN	0.0553304	-0.0224078	0.0533127	0.0891385	-0.184402	-0.0686709	0.00185932	-0.00956914
ARMC6_HUMAN	-0.0889819	-0.00379932	0.0229999	0.109631	-0.316801	0.143105	-0.0104634	0.0875753
ARMC8_HUMAN	-0.178406	0.0151089	0.00457225	0.239441	-0.0127742	0.0711907	0.0827879	-0.0604815
ARMT1_HUMAN	0.0990857	-0.0680249	-0.0115864	0.0256066	-0.173512	-0.0233173	-0.0391384	0.0895471
ARMX1_HUMAN	0.0668153	0.12932	-0.280951	0.0266406	0.0235488	0.115292	0.0267862	-0.122441
ARMX2_HUMAN	0.0987752	0.0290859	-0.0360959	-0.0484039	0.264132	0.14379	-0.0160095	-0.169316
ARMX3_HUMAN	0.0598355	0.0245235	0.00413282	0.17034	-0.226116	0.162613	-0.0818896	-0.0312129
ARP10_HUMAN	-0.0483831	-0.0219807	-0.0710524	0.0280614	0.0435121	0.12118	-0.000371234	-0.0293477
ARP19_HUMAN	-0.237332	-0.0344553	0.444676	-0.304639	0.0344553	0.192951	-0.104696	0.482736
ARP2_HUMAN	0.0457893	-0.0220005	-0.0924765	0.046524	0.0229024	-0.0279458	-0.0738959	0.0843885
ARP21_HUMAN	-0.0744858	0.0413012	0.0971787	-0.0448659	0.0334008	0.251168	-0.0459622	-0.0334008
ARP3_HUMAN	-0.0752484	0.0224953	-0.115339	0.0142131	0.194706	-0.0441687	-0.0604812	0.132421
ARP5L_HUMAN	-0.269205	-0.0560343	0.0804437	-0.23472	-0.13747	0.0793295	-0.0392571	0.229411
ARP6_HUMAN	NA	NA	NA	NA	NA	NA	NA	NA
ARPC2_HUMAN	0.0128475	0.063798	-0.191015	0.0523849	0.047702	0.157652	-0.149259	0.0360067
ARPC3_HUMAN	0.0928736	0.0636913	-0.14301	0.00580145	0.280883	0.0666295	-0.111287	0.00252496
ARPC4_HUMAN	0.0971787	0.0447023	-0.22785	0.182629	0.068855	-0.0823497	-0.0257896	-0.0454355
ARPC5_HUMAN	-0.19216	0.0318147	0.136136	-0.00771019	0.0892217	-0.0699443	-0.256777	-0.0136529
ARPIN_HUMAN	0.0545603	-0.0376286	-0.03073	0.311299	0.03073	0.152576	-0.160853	0.0633202
ARRB1_HUMAN	-0.0596953	0.0596953	0.418415	-0.0955848	0.228634	-0.289594	-0.0333226	-0.481912
ARRD1_HUMAN	NA	NA	NA	NA	NA	NA	NA	NA
ARSB_HUMAN	0.0396647	0.059181	0.059655	-0.216008	0.148616	0.22176	0.0296258	-0.159985
ARVC_HUMAN	-0.0831276	0.0102644	-0.101943	0.0532941	0.0391611	0.315752	-0.0498355	0.0722576
ARY1_HUMAN	-0.872623	-0.0727135	0.0428374	0.115943	0.264367	-0.144114	-0.236335	0.0776871
AS3MT_HUMAN	0.337401	-0.495903	0.345986	0.381159	-0.0174739	-0.155711	-0.26984	-0.0591407
ASAH1_HUMAN	-0.105433	-0.127762	0.125219	-0.0891945	-0.178951	0.170679	0.00753614	-0.00388643
ASAP1_HUMAN	NA	NA	NA	NA	NA	NA	NA	NA
ASAP3_HUMAN	NA	NA	NA	NA	NA	NA	NA	NA
ASB1_HUMAN	0.425817	0.178293	-0.13856	-0.0168877	0.173554	-0.0439729	0.0152692	-0.367638
ASB10_HUMAN	-0.0263278	0.00612682	-0.0661056	0.0143781	-0.0663019	0.119915	0.0808521	0.00175922
ASB11_HUMAN	-0.0268614	0.059462	-0.00214047	0.0544521	0.159412	0.188544	0.00214047	-0.133114
ASB12_HUMAN	-0.118187	-0.00737411	0.19117	-0.0258336	0.0152003	-0.261183	-0.184574	0.0314843
ASB14_HUMAN	-0.0531303	0.0978189	-0.0354236	0.0733463	-0.357975	-0.336245	0.0531303	0.0354236
ASB15_HUMAN	NA	NA	NA	NA	NA	NA	NA	NA
ASB16_HUMAN	-0.165275	0.185238	0.225948	-0.335636	0.0472518	0.190661	0.167422	-0.127159
ASB2_HUMAN	-0.00272646	-0.0268325	0.16889	0.0349129	-0.0330315	0.026383	0.102963	-0.076689
ASB5_HUMAN	NA	NA	NA	NA	NA	NA	NA	NA
ASB8_HUMAN	0.0229135	-0.0884835	-0.0505964	-0.0947786	0.183176	-0.253383	0.0768862	-0.0262652
ASCC3_HUMAN	-0.0795514	0.204145	-0.0774867	0.405861	0.18711	0.0362223	0.245952	-0.0641359
ASGL1_HUMAN	-0.0151068	0.117251	0.258535	0.101994	-0.240794	0.0208291	-0.180846	-0.169619
ASH2L_HUMAN	-0.0991201	0.0151989	-0.176866	0.153515	-0.0219892	0.0135369	0.0680762	-0.0612314
ASML_HUMAN	0.0392045	-0.163523	-0.19997	-0.036462	0.107213	0.344153	0.0116442	0.182716
ASNA_HUMAN	-0.00331621	0.0306503	-0.00771689	0.0115076	0.0614706	0.0160035	-0.0676331	-0.0457281
ASPC1_HUMAN	0.0172839	0.0869919	0.0493962	0.0105045	0.0582457	0.0906284	-0.122232	-0.013512
ASPG_HUMAN	0.303415	0.00833214	-0.0169901	-0.233058	0.0529542	-0.0456836	0.00170674	0.176185
ASPH_HUMAN	0.0236296	-0.0192536	0.00949323	0.00139964	-0.031196	0.0795914	-0.0156885	-0.0905577
ASPM_HUMAN	0.0828564	-0.0301533	0.304177	0.238617	-0.767955	0.0301533	0.0737204	-0.077304
ASPN_HUMAN	-0.0864147	1.12728	-0.15513	0.0742756	0.711346	-0.0164743	0.114482	-0.318583
ASSY_HUMAN	0.0136307	0.0240145	-0.195377	0.0791975	0.0200893	-0.0651697	-0.0782723	0.257514
AT11A_HUMAN	NA	NA	NA	NA	NA	NA	NA	NA
AT131_HUMAN	-0.107003	0.122505	-0.171007	0.0687431	0.115171	0.369506	-0.0619001	0.0495757
AT1A1_HUMAN	-0.0027405	0.000252105	-0.0692623	0.0610282	-0.117151	0.0272125	-0.0917739	0.247745
AT1A2_HUMAN	-0.0533903	-0.0288763	0.0620341	0.0592609	-0.182245	0.00398605	0.079968	0.0779595
AT1B1_HUMAN	-0.139636	-0.0325957	0.0831223	0.0523377	-0.2308	0.0189108	0.0907096	0.191888
AT1B3_HUMAN	0.00233616	0.205476	-0.00233616	0.0481696	0.192121	-0.145256	-0.144415	-0.0391149
AT1B4_HUMAN	-0.252676	0.0662239	0.00070742	-0.124808	-0.178367	-0.00179397	0.0823227	0.035254
AT2A1_HUMAN	0.0182113	0.0474361	-0.0113059	0.0075517	-0.107481	0.127567	0.0319413	-0.16531
AT2A2_HUMAN	0.0592805	-0.0576388	0.0369761	0.0219884	0.0468917	-0.223752	-0.0146174	0.0861009
AT2A3_HUMAN	-0.0657181	0.0856013	0.00940336	-0.112125	0.0242559	-0.00940336	0.0808734	-0.244773
AT2B1_HUMAN	0.0965491	0.0567719	0.0984057	-0.124036	0.0254741	-0.0474822	-0.243868	0.123495
AT2B2_HUMAN	-0.032157	-0.0875808	-0.0155366	-0.148596	0.00134999	0.220322	-0.00379242	0.0151859
AT2B4_HUMAN	-0.0280946	0.092975	-0.00818931	0.0329861	0.498904	-0.0693001	-0.00901527	-0.288186
AT2C1_HUMAN	0.0642547	0.0773667	0.016108	-0.0142938	0.152769	-0.00796279	-0.0519932	-0.198067
AT2L2_HUMAN	0.0256211	-0.0256211	0.156091	-0.170463	-0.275496	0.137227	0.0137233	-0.00811101
AT5F1_HUMAN	-0.0233697	-0.22896	0.235714	0.328817	-0.270979	-0.272359	0.164903	-0.0135371
AT8A1_HUMAN	-0.0848931	0.11233	0.000737539	-0.117326	-0.0102022	0.135625	-0.0911667	-0.143375
ATAD1_HUMAN	-0.0173318	-0.132568	0.362878	0.0038838	-0.142434	-0.214842	0.182018	0.031907
ATD3A_HUMAN	0.0346961	-0.179761	0.204341	0.168969	-0.269712	-0.148675	0.110443	0.0125561
ATD3B_HUMAN	-0.139127	-0.271467	0.297588	-0.00365294	-0.380888	-0.265678	0.121575	-0.0334389
ATD3C_HUMAN	NA	NA	NA	NA	NA	NA	NA	NA
ATE1_HUMAN	-0.0425514	-0.0592014	0.0168038	-0.0505481	-0.0770172	0.140553	-0.0334771	0.0730118
ATG2A_HUMAN	-0.0207593	0.240703	-0.204776	0.0659476	0.590236	0.648722	-0.0927311	-0.0601455
ATG2B_HUMAN	-0.175866	0.159133	0.0342884	-0.0939579	0.0948446	-0.154687	-0.0703809	0.0430604
ATG3_HUMAN	0.0709271	-0.00446437	-0.13304	-0.0634509	0.191291	-0.00397742	-0.0871674	0.0162178
ATG4A_HUMAN	0.275052	0.0192836	0.133314	-0.0178348	0.0178348	-0.0181533	-0.0867355	0.124939
ATG4B_HUMAN	-0.00303362	0.0162598	-0.0568592	0.0271398	-0.00290384	0.0553618	-0.0865883	0.124073
ATG5_HUMAN	-0.0170105	0.217296	-0.0216219	-0.170601	0.700644	0.0170105	-0.117701	0.204611
ATG7_HUMAN	0.0229111	-0.00637003	0.0526333	0.00637003	0.0863174	-0.0747096	-0.0513656	-0.0355342
ATG9A_HUMAN	-0.0478316	0.101046	0.0136858	-0.0943385	0.0237276	0.0146423	-0.119219	0.14892
ATL4_HUMAN	0.10288	-0.144421	-0.0862664	-0.00833289	-0.15921	0.0782397	-0.04289	0.137623
ATLA2_HUMAN	0.0919282	0.0281871	-0.0226918	0.00121694	-0.0745562	0.0710365	-0.0300559	-0.0021612
ATLA3_HUMAN	-0.0834338	0.588483	-0.096068	0.0437483	0.593756	-0.104993	0.00414406	-0.0675682
ATM_HUMAN	NA	NA	NA	NA	NA	NA	NA	NA
ATOX1_HUMAN	-0.00653828	-0.0847454	0.00245875	-0.0719608	-0.28174	0.0523883	-0.117519	0.047067
ATP23_HUMAN	0.304075	0.128282	-0.00235678	-0.333133	0.260554	-0.211687	0.00235678	-0.275168
ATP5H_HUMAN	-0.0755301	-0.299673	0.384126	0.206332	-0.290017	-0.270138	0.240015	-0.0242204
ATP5I_HUMAN	-0.0314814	-0.253541	0.332001	0.110618	-0.200418	-0.218512	0.249567	-0.038757
ATP5J_HUMAN	-0.0606018	-0.229081	0.664636	0.0255217	-0.159187	-0.519561	0.269489	0.0606018
ATP5L_HUMAN	-0.00500151	-0.324414	0.36429	0.141024	-0.289808	-0.218633	0.191962	-0.0368928
ATP5S_HUMAN	0.0166278	-0.124406	0.150471	0.190091	-0.18104	-0.201923	-0.0197039	0.0437823
ATP6_HUMAN	0.0125574	-0.366014	0.344351	0.334603	-0.119448	-0.268075	0.223618	-0.142018
ATP9A_HUMAN	NA	NA	NA	NA	NA	NA	NA	NA
ATPA_HUMAN	-0.0311838	-0.234246	0.307863	0.186129	-0.211456	-0.251673	0.18773	-0.0371037
ATPB_HUMAN	-0.0293104	-0.20688	0.270111	0.178605	-0.152585	-0.227597	0.135501	-0.0315104
ATPD_HUMAN	-0.0136079	-0.226684	0.279891	0.224209	-0.174689	-0.130256	0.0789925	-0.0261764
ATPF1_HUMAN	0.0252993	-0.36152	0.0169126	0.129097	-0.577019	-0.061521	0.0263794	0.0880822
ATPF2_HUMAN	-0.00785195	-0.204026	0.142498	0.220166	-0.0623809	-0.139851	0.0778721	-0.0375332
ATPG_HUMAN	-0.00446576	-0.248625	0.18063	0.21884	-0.101926	-0.234404	0.28143	-0.0374834
ATPK_HUMAN	-0.0453855	-0.260584	0.231822	0.35847	-0.138899	-0.314231	0.394357	-0.0819595
ATPO_HUMAN	-0.0144273	-0.264387	0.257928	0.205858	-0.222409	-0.299	0.175691	-0.0112956
ATRN_HUMAN	0.678986	0.148956	-0.4928	-0.28671	-0.166056	0.0355573	0.0443994	-0.529891
ATRX_HUMAN	-0.242315	0.136523	-0.12895	-0.0247552	0.256315	0.0997509	-0.0424871	-0.00896505
ATX10_HUMAN	0.00254097	-0.0610486	-0.00136696	-0.011111	-0.114507	0.203047	-0.0200426	0.0272551
ATX2_HUMAN	-0.0396805	0.031373	0.0536359	0.0572617	-0.180044	0.0349507	-0.00621339	0.0593818
ATX2L_HUMAN	0.152033	0.0892404	0.0113445	0.158206	-0.147379	0.0288185	-0.0874416	-0.124544
AUHM_HUMAN	-0.122153	-0.278147	0.33103	0.259393	-0.388673	-0.31909	0.12332	0.0712846
AUP1_HUMAN	-0.0695141	0.100927	0.0202818	0.139807	-0.0284732	-0.0581135	0.0749276	0.030732
AVEN_HUMAN	0.103676	-0.000856235	-0.0711987	0.0492219	-0.291281	0.109394	-0.064743	-0.0265874
B2CL1_HUMAN	-0.0377133	-0.00140309	0.0161546	0.176891	0.0661872	-0.299273	-0.295916	0.00140309
B2L13_HUMAN	0.0223	-0.11592	0.00656692	0.0327526	-0.17284	0.000515075	0.0348384	-0.0348384
B2MG_HUMAN	-0.0701135	-0.131215	0.0150268	-0.0357885	0.460231	0.458877	-0.107189	-0.0992531
B3AT_HUMAN	0.240927	0.193612	-0.235975	-0.233881	1.42666	-0.0933836	0.0902434	-0.352347
B3GA3_HUMAN	NA	NA	NA	NA	NA	NA	NA	NA
B3GL2_HUMAN	0.0431602	0.140498	0.215335	-0.17878	-0.030041	0.0344816	0.0206111	-0.0169999
BABA1_HUMAN	-0.0164684	0.057221	-0.0508681	-0.0553715	0.0390042	-0.0179424	0.0205101	0.107598
BABA2_HUMAN	-0.00385278	0.00385278	0.0079468	0.122996	0.170813	-0.0652755	-0.066333	0.000766892
BACH_HUMAN	0.416671	0.220989	-0.051709	-0.128393	0.999683	-0.0800486	-0.208728	-0.0425619
BAF_HUMAN	-0.0070619	0.0151203	-0.0317615	0.0320274	0.0406004	-0.037564	-0.129074	0.0514442
BAG1_HUMAN	0.109404	-0.015787	0.015787	0.0189224	-0.151746	-0.163154	0.103547	0.0144846
BAG2_HUMAN	-0.0478992	-0.120657	0.0260738	0.107371	-0.0757658	0.0353055	0.127951	-0.0844877
BAG3_HUMAN	0.016491	-0.0307631	0.00138234	-0.0957145	-0.334248	0.192244	-0.01994	0.103013
BAG5_HUMAN	0.154674	0.126493	0.00896999	0.0600625	-0.030659	0.0111372	-0.0484004	-0.0741971
BAG6_HUMAN	-0.105367	-0.0166844	0.0479637	0.00640864	-0.057019	0.0458693	0.00734614	-0.011556
BAK_HUMAN	-0.26814	-0.419644	-0.183293	0.635861	-0.104379	0.337224	-0.0716607	0.242145
BAP18_HUMAN	0.0128046	0.187943	-0.00444829	-0.166738	0.256214	0.0189779	-0.0676666	-0.0658847
BAP29_HUMAN	-0.0453118	0.071656	-0.140967	0.0583915	-0.197646	0.0709812	-0.0318648	0.0382688
BAP31_HUMAN	0.0134292	0.0779305	0.0321939	-0.0964569	-0.284805	0.0414624	-0.160534	-0.0226421
BASI_HUMAN	0.0126276	-0.144313	0.231048	0.0454322	-0.204423	-0.0150257	7.16e-05	-0.143681
BASP1_HUMAN	NA	NA	NA	NA	NA	NA	NA	NA
BAX_HUMAN	-0.0820046	0.665941	-0.210833	0.292786	0.51063	-0.282488	-0.74664	-0.808312
BAZ1B_HUMAN	-0.00417313	0.0559965	-0.118286	0.0520811	0.0728421	0.00639699	0.0222295	0.0621663
BCAM_HUMAN	0.029436	0.303591	-0.0434122	0.0128804	0.112356	-0.112731	-0.0650603	0.0279958
BCAR1_HUMAN	0.0768683	0.046977	0.0163461	0.0184603	-0.00252528	-0.037277	-0.103887	0.0664907
BCAS3_HUMAN	0.184085	0.0624533	-0.179229	0.00431023	0.396306	-0.0323089	-0.113223	-0.033114
BCAT2_HUMAN	0.219296	-0.142825	0.45227	-0.120043	-0.315699	-0.179114	-0.0029493	0.0947933
BCCIP_HUMAN	0.0162332	-0.0994102	-0.0695719	0.0345379	-0.0949912	0.0306544	-0.145125	0.119581
BCDO2_HUMAN	-0.277024	-0.137089	0.276697	-0.0071047	-0.456367	0.276018	0.0071047	-0.182235
BCKD_HUMAN	-0.122377	-0.238009	0.198804	0.0979606	0.00851783	-0.0517674	0.0603623	-0.00795358
BCL2_HUMAN	0.0255743	0.0908413	-0.112408	-0.30207	-0.00866254	0.0175359	-0.190272	0.284408
BCLF1_HUMAN	0.0160778	0.187405	-0.24209	-0.142172	0.0522161	0.132619	-0.0216314	-0.0254044
BCS1_HUMAN	-0.0133695	-0.10534	0.0473024	0.195953	-0.102593	-0.0296294	0.0795656	-0.0196351
BDH_HUMAN	0.252171	-0.0882161	0.229358	0.241523	-0.452625	-0.177732	-0.0881933	-0.0110996
BDH2_HUMAN	0.291005	0.00386251	0.0345336	0.389584	-0.0251928	-0.00386251	-0.151121	-0.0216647
BECN1_HUMAN	0.0717837	0.126691	-0.183426	2.46e-05	0.142652	-0.0585749	-0.00842117	0.0678245
BGAL_HUMAN	-0.0156662	0.0679378	-0.0557329	-0.0352686	0.164462	-0.389022	0.168097	-0.0195574
BGH3_HUMAN	-0.0452601	0.427469	-0.207738	0.0747619	0.131215	-0.0177116	-0.0180444	-0.0312928
BGLR_HUMAN	-0.141417	-0.0759028	0.00361421	0.295465	0.012534	-0.0232004	-0.143456	-0.0462198
BICD2_HUMAN	-0.00268549	0.0260448	0.111248	-0.015966	-0.138317	0.015966	-0.0190692	0.00268549
BID_HUMAN	0.188304	-0.030902	-0.454366	-0.00747244	0.797549	0.0442469	-0.251521	-0.0669687
BIEA_HUMAN	0.148885	0.0248854	-0.0134215	-0.000438295	0.149053	0.000438295	-0.112926	-0.207929
BIG2_HUMAN	-0.295185	0.129816	0.127808	-0.0772898	-0.198565	-0.0328541	0.152861	0.078543
BIN1_HUMAN	-0.0203992	-0.0506341	0.0692741	-0.0901631	-0.149382	0.285735	-0.0523054	0.098562
BIN2_HUMAN	-0.0115721	0.287896	-0.0154088	-0.213642	1.0346	-0.142525	0.0860061	-0.0423103
BIP_HUMAN	0.00497721	-0.0569898	0.103557	-0.00746968	-0.14646	0.0485336	-0.016369	0.00932302
BIRC2_HUMAN	-0.0274423	0.00135862	0.156033	-0.155785	-0.124701	0.149818	-0.11257	0.155211
BIRC6_HUMAN	0.0159812	0.0780375	0.0176869	-0.162237	-0.0464547	0.00297574	-0.00297574	-0.0176869
BL1S1_HUMAN	0.000546846	0.0465863	-0.000546846	-0.107812	-0.212407	0.168311	0.0674316	0.0358603
BLMH_HUMAN	-0.0758314	-0.0724746	-0.0181075	0.0167036	0.0128619	0.084223	-0.0247885	0.0725971
BLVRB_HUMAN	0.199483	0.0957572	-0.177314	-0.151716	0.470352	-0.0209965	-0.0122017	-0.242465
BMP2K_HUMAN	0.0624495	-0.000919902	0.0505548	-0.208549	0.0669647	-0.079494	0.0238043	0.0218806
BOLA1_HUMAN	0.0961574	0.108355	-0.334875	-0.428381	-0.124255	-0.24414	0.0954525	0.251155
BOLA2_HUMAN	-0.0669962	0.0288656	-0.0550844	-0.0129068	0.0168721	0.0778855	-0.149769	0.0200932
BOLA3_HUMAN	0.0768345	-0.35194	0.0542881	0.160242	-0.317165	-0.0722297	-0.0534205	0.129876
BOP1_HUMAN	0.0165673	-0.0584216	-0.0776399	0.0768747	0.153823	-0.509316	-0.193756	0.0174873
BORC5_HUMAN	NA	NA	NA	NA	NA	NA	NA	NA
BORC6_HUMAN	-0.0113155	0.0609147	-0.0366521	0.0787424	-0.108025	0.0535548	0.0127926	0.0395664
BORG4_HUMAN	-0.0251599	0.0251599	0.0317701	0.343803	-0.152628	-0.23615	-0.0339067	0.102437
BPHL_HUMAN	0.079794	-0.331463	0.0348049	0.0301352	-0.205635	-0.0555362	0.0964742	0.0566023
BPI_HUMAN	0.253963	0.107922	-0.295306	-0.0866657	2.32033	-0.0104793	0.0104793	-0.0120883
BPL1_HUMAN	0.00173692	0.142939	-0.00429086	-0.0207362	-0.429133	0.0844175	0.0229197	-0.0352842
BPNT1_HUMAN	0.012986	-0.102742	-0.0198959	-0.0404424	0.027037	0.0150667	-0.0791954	0.0226502
BRAT1_HUMAN	NA	NA	NA	NA	NA	NA	NA	NA
BRCA2_HUMAN	NA	NA	NA	NA	NA	NA	NA	NA
BRCC3_HUMAN	0.00695291	0.0126965	-0.100396	0.0780623	-0.00398337	0.0601108	-0.0352695	0.0587525
BRD3_HUMAN	-0.0407531	-0.00631527	-0.0997235	0.0440314	0.00631527	0.0788309	0.0271352	-0.0265388
BRD4_HUMAN	NA	NA	NA	NA	NA	NA	NA	NA
BRE1A_HUMAN	NA	NA	NA	NA	NA	NA	NA	NA
BRNP1_HUMAN	NA	NA	NA	NA	NA	NA	NA	NA
BROX_HUMAN	0.0531246	0.0579312	-0.0428463	0.0558576	0.0408625	0.000162286	-0.0200614	-0.0820718
BST1_HUMAN	-0.0990115	0.165504	0.148916	0.00482457	0.650706	-0.0423876	-0.0522957	0.130119
BST2_HUMAN	0.12141	-0.101058	-0.00184428	0.205785	-0.241314	0.00184428	0.15356	-0.0621667
BT3A3_HUMAN	NA	NA	NA	NA	NA	NA	NA	NA
BT3L4_HUMAN	-0.0418281	-0.035272	-0.00552237	0.0724502	-0.0842237	0.0746643	0.0148837	-0.0399949
BTBD1_HUMAN	0.0143752	-0.00717692	0.017468	-0.0944486	0.130828	-0.017468	-0.0846375	-0.00113587
BTD_HUMAN	0.144809	-0.265107	0.102404	-0.10802	-0.0516391	0.074836	0.0885415	-0.0897453
BTF3_HUMAN	0.00147876	-0.00555481	0.0404536	0.00914684	-0.245542	0.0216976	-0.156919	0.057529
BUB3_HUMAN	0.0573391	0.0212885	0.0861388	-0.194075	-0.198156	0.0777856	-0.0265137	0.0165255
BUD23_HUMAN	NA	NA	NA	NA	NA	NA	NA	NA
BUD31_HUMAN	-0.380932	-0.0467376	0.0647197	0.0383662	0.0677842	0.0355127	-0.0355127	-0.291298
BYST_HUMAN	0.0449462	-0.433094	0.00782621	0.0353677	0.226255	-0.144627	0.0547943	-0.336389
BZW1_HUMAN	-0.0477675	0.00972209	-0.0317655	0.0620271	-0.226511	0.138196	0.0621606	0.0317655
BZW2_HUMAN	-0.0162849	-0.126561	0.0540956	0.063651	-0.216557	-0.123756	0.0128117	0.0870445
C163A_HUMAN	-0.0864887	0.253751	-0.144992	-0.0712223	0.0236977	0.124492	0.0206209	0.00162212
C19L1_HUMAN	0.213295	0.359776	-0.511093	-0.418816	-0.145543	-0.0260024	0.089851	0.216815
C1QA_HUMAN	NA	NA	NA	NA	NA	NA	NA	NA
C1QB_HUMAN	0.217841	0.573036	-0.243056	-0.0330795	0.236214	-0.0715952	0.215594	-0.169353
C1QBP_HUMAN	-0.0808333	-0.191906	0.145037	0.200853	-0.10578	-0.131318	0.0528054	0.0467501
C1QC_HUMAN	0.578081	0.577165	-0.437129	0.0044018	0.230813	-0.202867	0.108409	-0.409152
C1QR1_HUMAN	-0.0224036	0.0324335	0.0995146	0.0309621	-0.0364873	-0.0234178	-0.0861958	-0.0083739
C1R_HUMAN	0.27375	0.337513	-0.298148	-0.0388533	0.173796	0.0802506	-0.0711915	-0.176585
C1RL_HUMAN	NA	NA	NA	NA	NA	NA	NA	NA
C1S_HUMAN	0.277242	0.131195	-0.153031	-0.109265	0.0510818	-0.0191768	-0.00839028	-0.198033
C1TC_HUMAN	0.0119822	-0.00343246	-0.0129439	-0.0106897	-0.0608563	0.0575934	-0.00527646	-0.0139944
C2C2L_HUMAN	0.00137911	0.0986999	0.10976	-0.0388572	0.511896	-0.0617165	-0.00137911	-0.0152597
C2CD2_HUMAN	-0.532353	0.127663	-0.0648879	-0.203934	0.234069	0.0648879	-0.18153	-0.156559
C2CD5_HUMAN	NA	NA	NA	NA	NA	NA	NA	NA
C2D1A_HUMAN	0.0313622	0.00949057	0.0509222	0.131169	-0.0906867	0.00868825	-0.159093	-0.0307849
C2D1B_HUMAN	-0.0131926	0.0490703	-0.0260719	0.0979711	0.05948	0.0262816	-0.00682827	0.0143155
C43BP_HUMAN	0.0505099	-0.0594024	0.236428	-0.152725	-0.202555	0.138169	0.0176863	0.197686
C4BPA_HUMAN	0.270295	0.206646	-0.652627	-0.314442	0.194642	-0.109811	0.14056	-0.399402
C4BPB_HUMAN	-0.907054	0.182804	-0.565681	-0.0184492	0.0184492	-1.07622	0.162843	-0.728094
C560_HUMAN	-0.0322861	-0.160749	0.425819	-0.0225141	-0.544639	-0.188507	0.224234	0.0322861
C56D2_HUMAN	NA	NA	NA	NA	NA	NA	NA	NA
C99L2_HUMAN	0.161546	0.170595	-0.173438	-0.0660504	-0.134919	0.162605	-0.181102	0.120464
CA050_HUMAN	-0.13696	-0.0239179	0.0524531	-0.0571335	-0.0468724	0.11424	-0.0574786	0.0869767
CA109_HUMAN	-0.666701	0.0140856	-0.0308246	0.87131	-0.0432372	0.14035	-0.216265	0.125195
CA123_HUMAN	-0.0158154	-0.0194744	-0.00174658	0.00199199	-0.11229	0.123777	-0.0739479	0.16713
CA174_HUMAN	0.126139	0.377589	-0.220426	-0.137643	-0.00121652	0.095805	0.00121652	0.519326
CA198_HUMAN	-0.0354804	-0.0180697	-0.0939234	0.0428544	-0.137325	0.188094	0.129671	-0.0485745
CA2D1_HUMAN	0.0158889	0.0088376	0.0185797	-0.00584949	-0.06885	0.00379051	0.0660978	-0.127159
CA2D3_HUMAN	NA	NA	NA	NA	NA	NA	NA	NA
CAB39_HUMAN	0.0488978	-0.105821	0.0109608	0.045195	-0.0923832	0.0646582	-0.0375622	0.00568075
CAC1S_HUMAN	-0.00710881	-0.0141109	0.00932086	-0.00607932	-0.0436299	0.00672528	0.0742591	-0.0299294
CACB1_HUMAN	-0.0894979	-0.033542	0.0554744	-0.010701	-0.0574825	0.0453416	0.0535746	0.00175632
CACL1_HUMAN	-0.243182	-0.331332	0.0724456	0.358268	-1.59611	0.0991931	0.0533123	-0.0533123
CACO1_HUMAN	-0.0866703	0.0989853	0.0276958	-0.0897178	0.205074	-0.0978618	-0.0238915	0.0778805
CACO2_HUMAN	0.0668844	-0.044055	0.0577512	-0.0101738	-0.0092368	-0.00914246	-0.0267411	-0.0571459
CACP_HUMAN	0.0403027	-0.242415	0.184009	0.109602	-0.247858	-0.0738203	0.148075	0.273518
CAD13_HUMAN	0.0178876	-0.0388102	-0.031923	-0.00946741	-0.117693	0.0862961	0.0805731	0.00184728
CAD15_HUMAN	-0.0360763	0.0364156	-0.0214087	0.107395	-0.040403	0.0320785	-0.164585	0.0830532
CADH5_HUMAN	0.0847401	0.118626	-0.0315845	-0.0240327	0.220288	-0.272956	-0.0198058	-0.148896
CADH6_HUMAN	-0.0104098	0.489902	0.0104098	0.0754745	-0.107798	0.0472955	-0.0433148	-0.0324503
CAF17_HUMAN	-0.0243609	-0.140953	0.128785	0.129293	-0.156849	-0.145879	-0.0251172	0.0313863
CAH1_HUMAN	0.498317	0.176097	-0.292991	-0.328363	0.978988	-0.0754157	0.0872809	-0.411331
CAH13_HUMAN	NA	NA	NA	NA	NA	NA	NA	NA
CAH14_HUMAN	0.193155	0.104331	-0.376616	0.450774	-0.093826	-0.131333	-0.0279326	0.164341
CAH2_HUMAN	0.289241	0.0467613	-0.0763317	-0.447355	0.642395	-0.00666757	0.00465724	-0.134862
CAH3_HUMAN	-0.0615228	-0.028803	0.0683668	-0.232299	-0.0955484	0.218904	-0.11434	0.453434
CAH4_HUMAN	0.272689	-0.915988	0.168846	-0.0116303	-0.417943	0.11967	-0.149205	-0.00534835
CAH8_HUMAN	NA	NA	NA	NA	NA	NA	NA	NA
CAHM5_HUMAN	-0.321185	0.169102	-0.0727276	0.0710561	0.173439	0.166699	0.0337952	-0.215566
CALD1_HUMAN	-0.0211008	0.676429	0.00538691	0.0775715	0.21903	-0.151724	-0.213626	0.0550129
CALM2_HUMAN	0.167855	0.032175	-0.160554	-0.0169819	0.0127955	0.0986874	-0.163553	0.0558918
CALR_HUMAN	0.0444699	-0.005708	-0.0166133	0.00377591	0.027446	0.151455	-0.0161324	-0.0915974
CALU_HUMAN	0.0589863	-0.00560856	-0.000195086	-0.00554873	0.000195086	0.00455474	-0.136345	0.0829645
CALX_HUMAN	-0.0101937	0.00104461	0.0875881	0.0145833	-0.0157205	0.0799947	-0.0476797	-0.051395
CAMLG_HUMAN	0.0733093	0.102217	0.307853	-0.129536	-0.400357	0.00338693	-0.034336	-0.00338693
CAMP_HUMAN	0.311373	0.207071	-0.207071	-0.274639	2.36455	-0.461694	0.427534	-0.240588
CAMP1_HUMAN	-0.0958413	-0.00604994	0.050094	0.197466	-0.105441	0.0481293	0.0032515	0.0592303
CAN1_HUMAN	0.10935	0.00901377	-0.122223	0.0233388	0.164234	0.0230691	-0.0400703	-0.0218797
CAN2_HUMAN	0.0807709	0.00401226	-0.0346326	0.0792668	-0.151004	0.0636125	-0.100506	0.0586644
CAN3_HUMAN	0.00132592	-0.0918907	-0.00944608	0.142271	-0.120691	0.176341	-0.00831084	-0.0877212
CAN5_HUMAN	NA	NA	NA	NA	NA	NA	NA	NA
CAN7_HUMAN	0.00447645	-0.00919171	0.0497282	-0.0550345	-0.12137	0.0294483	-0.0422928	-0.00370942
CANB1_HUMAN	-0.00100468	0.0184849	-0.12683	0.0997233	0.134622	-0.0710918	0.0238224	-0.172812
CAND1_HUMAN	0.135093	0.134724	-0.331807	-0.0593974	0.415593	0.0289593	-0.0313858	-0.0720225
CAND2_HUMAN	0.00760034	-0.0751371	0.0955103	-0.00569866	-0.010632	0.0225612	-0.0159089	0.00603373
CAP1_HUMAN	0.0424273	0.160468	-0.0969191	0.00904812	0.362348	-0.0328851	-0.0870285	-0.040572
CAP2_HUMAN	-0.0116843	-0.0224722	-0.0546205	-0.0158311	-0.141135	0.231419	0.0137264	0.0998597
CAP7_HUMAN	-0.0624833	-0.0901967	0.225616	-0.26306	0.366834	0.0352373	0.0359809	-0.0921156
CAPG_HUMAN	-0.00124503	0.237765	0.0115554	-0.367555	0.134947	0.067463	-0.272228	-0.196455
CAPR1_HUMAN	-0.0492411	-0.0219831	0.0492411	0.0697567	-0.136221	0.0939938	-0.00393373	0.0735356
CAPZB_HUMAN	-0.0119869	-0.0117375	-0.0411354	-0.0264749	-0.00796466	0.0239778	-0.00796135	0.0295139
CAR19_HUMAN	-0.0659782	-0.382789	0.0180005	-0.000576988	-0.331751	-0.225232	0.0504345	-0.019742
CARD8_HUMAN	NA	NA	NA	NA	NA	NA	NA	NA
CARM1_HUMAN	-0.0369525	0.0724356	-0.0944718	0.0207729	0.0140387	-0.0212554	0.00418441	0.0513713
CASC3_HUMAN	0.0615136	-0.288835	0.0433631	-0.0299028	-0.0140121	0.175491	-0.131563	-0.513171
CASP3_HUMAN	0.086407	0.429328	0.0539492	-0.436764	0.303206	-0.232591	-0.0712714	-0.0539492
CASP7_HUMAN	NA	NA	NA	NA	NA	NA	NA	NA
CASP8_HUMAN	NA	NA	NA	NA	NA	NA	NA	NA
CASPE_HUMAN	0.071829	-0.019779	-0.0771398	0.200817	-0.236867	0.0583366	0.0131214	-0.237859
CASQ1_HUMAN	0.0213175	-0.0516621	0.035055	0.00965014	-0.0363507	0.0929833	0.0928654	-0.0834838
CASQ2_HUMAN	-0.0178128	0.0370426	-0.106501	0.185731	-0.0164627	-0.115707	-0.10316	0.0482754
CAST2_HUMAN	0.113907	-0.0524341	-0.255791	0.0817774	-0.0374878	0.149516	-0.00976918	0.0277284
CASZ1_HUMAN	-0.0191445	0.0624114	0.128767	-0.149247	0.0593311	0.00957984	-0.0360792	-0.0299636
CATA_HUMAN	0.329629	0.193611	-0.188198	-0.126788	0.753044	-0.0616438	-0.0181921	-0.203414
CATB_HUMAN	-0.00248584	-0.15175	0.156059	-0.0208836	-0.245644	0.227199	-0.115432	0.276502
CATC_HUMAN	-0.0165455	-0.023955	0.000408073	0.175002	-0.0184774	-0.0636428	0.0120798	-0.0894029
CATD_HUMAN	-0.130937	-0.0617498	0.243183	-0.0468035	-0.212285	-0.0134386	0.0940746	0.103252
CATG_HUMAN	0.00604768	0.087523	0.140092	0.0451572	1.19139	-0.162467	-0.111658	-0.312704
CATH_HUMAN	-0.20956	0.0168646	0.063538	-1.55e-05	-0.38404	0.210549	-0.152936	0.290862
CATL1_HUMAN	-0.0518361	-0.0968668	-0.104796	0.106231	-0.155685	0.00502893	0.0681255	0.05591
CATZ_HUMAN	-0.177149	-0.151836	0.0870209	-0.234226	-0.156378	0.341271	0.148445	0.508294
CAV1_HUMAN	-0.154283	0.0540128	-0.0566086	0.274055	-0.126384	-0.000587804	-0.0785851	0.0209698
CAV2_HUMAN	-0.497183	0.332239	0.0218761	0.055021	-0.160358	0.0275173	-0.0170907	0.0718113
CAV3_HUMAN	-0.0541712	0.0427186	-0.171198	-0.0116983	-0.00177487	0.30215	0.154771	-0.000859333
CAVN1_HUMAN	-0.0494143	0.193155	-0.0444435	0.0389579	0.0139834	0.0470895	-0.00235569	-0.000312991
CAVN2_HUMAN	-0.0547579	0.0162072	0.0178323	0.184845	0.0623886	-0.00562221	-0.0310319	-0.0859658
CAVN3_HUMAN	-0.0535349	0.389352	-0.00176026	-0.0177064	0.244098	-0.164153	-0.0491869	0.103631
CAVN4_HUMAN	-0.0131533	0.2549	-0.314406	-0.047912	-0.00979084	0.318401	0.0707716	0.0590429
CAZA1_HUMAN	-0.000732675	0.0706622	-0.0720366	-0.0744974	0.256939	0.0050904	0.0154871	-0.0950147
CAZA2_HUMAN	-0.000444557	0.0110965	-0.0688754	0.0123182	-0.0855909	0.00326255	0.0156101	0.0518369
CB068_HUMAN	0.110505	-0.256244	-0.129704	0.0970411	-0.279997	0.0152505	-0.0875133	0.0485582
CB069_HUMAN	-0.0110802	-0.0190422	0.00786559	0.0151094	-0.202111	0.0663332	-0.100937	0.0806386
CB39L_HUMAN	NA	NA	NA	NA	NA	NA	NA	NA
CBG_HUMAN	0.855059	0.143182	-0.141821	0.258169	-0.152072	0.0120304	-0.120285	-0.125341
CBL_HUMAN	0.384869	0.0842003	-0.207177	-0.0374028	0.285213	0.112088	-0.0422948	0.0374028
CBPA3_HUMAN	-0.057861	0.0234208	-0.139941	0.322128	0.427447	-0.73715	-0.359895	0.057955
CBPB2_HUMAN	0.342917	0.109714	-0.419932	-0.0523559	0.244553	-0.0523277	-0.0610344	-0.12785
CBPC4_HUMAN	-0.0682119	-0.900215	0.671967	1.09243	0.637373	-0.388675	-0.0996965	0.501442
CBPM_HUMAN	NA	NA	NA	NA	NA	NA	NA	NA
CBPN_HUMAN	0.440298	0.141613	-0.284728	-0.273134	0.423005	-0.0190378	-0.00798268	-0.359217
CBPQ_HUMAN	NA	NA	NA	NA	NA	NA	NA	NA
CBR1_HUMAN	0.0627311	-0.0147314	0.121085	0.139797	-0.163261	-0.00144862	-0.330585	-0.0206295
CBR4_HUMAN	-0.20391	-0.241063	0.326989	0.0144635	-0.262381	-0.00707964	0.177714	0.108982
CBX1_HUMAN	-0.308217	0.19392	-0.0491932	-0.0947173	0.160839	0.079475	-0.119679	0.318219
CBX3_HUMAN	-0.0892964	-0.0113837	-0.0212429	0.0481747	0.0611278	0.0998516	-0.0158458	0.0177503
CBX5_HUMAN	-0.0896274	0.0175094	-0.17022	-0.0610145	0.118467	0.00287411	-0.09545	-0.00637937
CC124_HUMAN	-0.1434	-0.0624281	0.0434289	-0.00200234	0.000839003	0.127953	-0.0208478	0.0118519
CC127_HUMAN	0.0623831	-0.207283	-0.0754787	0.43763	-0.226962	-0.185741	0.30977	0.213951
CC134_HUMAN	-0.0403084	0.0901968	-0.0716701	-0.000224021	0.0322597	0.000180349	0.112395	0.0540039
CC141_HUMAN	NA	NA	NA	NA	NA	NA	NA	NA
CC194_HUMAN	NA	NA	NA	NA	NA	NA	NA	NA
CC50A_HUMAN	-0.0871133	-0.0697184	0.268983	-0.153592	-0.112384	-0.0671042	0.191432	0.150228
CCAR1_HUMAN	-0.0637718	0.0744377	0.0124045	0.0031532	0.13372	-0.0124045	-0.000630143	-0.0031532
CCAR2_HUMAN	-0.173657	0.0745848	-0.164091	0.123272	-0.0218295	0.119698	0.0373856	0.0145117
CCD12_HUMAN	-0.00403957	0.0399141	-0.0278248	-7.63e-05	-0.221534	0.133588	-0.0507968	0.0493016
CCD22_HUMAN	-0.116479	0.00585532	-0.0658351	0.0387433	0.0462527	0.0194152	0.0579086	-0.112617
CCD25_HUMAN	-0.152448	-0.200462	0.200149	-0.0800189	0.008228	0.00958864	0.176192	0.363048
CCD43_HUMAN	0.0236379	-0.219722	-0.148782	0.130173	-0.425913	0.196227	-0.375134	0.16331
CCD47_HUMAN	0.061777	0.0114504	-0.00891889	-0.0124157	-0.00713611	0.0407034	0.00788882	-0.0664743
CCD50_HUMAN	NA	NA	NA	NA	NA	NA	NA	NA
CCD51_HUMAN	-0.0299998	-0.155522	0.0531973	0.199782	-0.195794	-0.0785448	0.0822265	-0.0360435
CCD58_HUMAN	0.00749567	-0.369206	0.168063	0.130047	-0.583642	-0.319012	0.154273	-0.0782668
CCD80_HUMAN	-0.130965	0.344353	-0.315483	0.0848832	0.087648	-0.0264067	-0.120392	-0.158166
CCD91_HUMAN	-0.126304	-0.0318691	-0.0770718	-0.0603611	-0.0860536	0.186	0.0209916	0.0611139
CCD93_HUMAN	-0.0403193	-0.157734	0.110508	0.109973	-0.0447209	0.0733107	0.0601978	-0.0912174
CCD97_HUMAN	-0.145342	0.141884	0.0452743	0.159384	-0.145798	-0.0957235	0.131912	-0.00228431
CCD9B_HUMAN	-0.0483587	-0.100668	0.00932888	0.0110134	0.04022	0.0803531	-0.0904957	-0.0213779
CCDB1_HUMAN	-0.0131756	-0.0202382	-0.00645567	-0.0772139	0.114838	0.397598	-0.23884	0.111672
CCDC6_HUMAN	-0.548018	0.0564066	0.286811	0.194548	-0.191087	-0.0529852	-0.0919183	0.105242
CCG1_HUMAN	-0.00247399	0.0485285	-0.165276	0.0210005	-0.141527	0.0692318	0.0807064	0.0290435
CCHL_HUMAN	0.00130747	-0.130114	0.178178	0.322343	-0.670629	-0.105304	0.300078	0.0819004
CCL18_HUMAN	NA	NA	NA	NA	NA	NA	NA	NA
CCNY_HUMAN	NA	NA	NA	NA	NA	NA	NA	NA
CCPG1_HUMAN	-0.180366	0.108339	-0.172748	-0.236262	0.305508	0.210177	0.0199121	-0.0199121
CCS_HUMAN	-0.0493809	-0.0608256	-0.0526015	-0.092198	0.324017	0.0310602	0.0465708	0.00574706
CCYL1_HUMAN	0.0721493	-0.0926017	-0.0766048	0.343021	0.240734	-0.191404	0.0505469	0.189366
CCZ1_HUMAN	0.27723	-0.321631	0.019411	-0.0108294	-0.443977	0.114217	0.0108294	-0.0394427
CD054_HUMAN	0.10739	-0.0530662	-0.105761	-0.00310271	-0.121904	0.00827579	0.0293771	0.0349861
CD109_HUMAN	-0.0190279	0.218277	-0.030253	0.173111	0.0597443	-0.302127	-0.152511	0.0190279
CD11B_HUMAN	-0.276625	-0.0610756	-0.0131113	0.0936833	0.0221553	-0.0236535	-0.0526223	0.119241
CD14_HUMAN	0.0179522	0.100803	-0.0827233	-0.0811787	-0.138039	0.0758203	0.00279977	-0.0160996
CD151_HUMAN	-0.501354	0.212499	0.0789344	0.185125	-0.132094	-0.0361753	-0.0198555	0.0198555
CD226_HUMAN	NA	NA	NA	NA	NA	NA	NA	NA
CD2AP_HUMAN	0.0156832	0.0124358	0.0682899	0.00785768	0.116945	-0.0760571	-0.0299735	-0.180641
CD2B2_HUMAN	-0.139295	0.0505749	0.0304885	0.0265669	0.0626241	0.0149026	-0.069569	-0.134917
CD34_HUMAN	-0.0340791	-0.126733	0.024044	0.378225	0.039237	0.00940223	-0.0882906	-0.172981
CD36_HUMAN	0.171749	-0.0495835	-0.110616	0.0744451	-0.13532	-0.0352174	-0.165025	0.114728
CD37L_HUMAN	NA	NA	NA	NA	NA	NA	NA	NA
CD38_HUMAN	-0.268306	0.0664997	-0.0352587	-0.1615	-0.09871	0.369436	-0.001725	0.0237332
CD44_HUMAN	0.0592482	0.499371	-0.414976	0.0267782	0.765001	-0.114092	-0.0149389	-0.225592
CD47_HUMAN	0.412552	0.197481	-0.0698639	-0.16635	0.994315	0.19896	0.0511267	-0.145549
CD59_HUMAN	0.0571414	-0.0764667	-0.270156	0.0706454	-0.0880593	0.0142459	0.0598269	0.298198
CD5L_HUMAN	1.0737	-0.091613	-0.672131	0.154907	-0.0850581	-0.123432	0.032402	-0.627196
CD81_HUMAN	0.0157782	0.331478	-0.179804	0.255923	0.282556	-0.172516	-0.158812	0.0248113
CD9_HUMAN	-0.00477014	1.23614	-0.167437	0.499062	0.827113	-0.221309	-0.100845	0.00556601
CD97_HUMAN	0.219556	0.0530563	0.117288	-0.332743	0.597183	-0.0489412	-0.157932	-0.14724
CDC16_HUMAN	NA	NA	NA	NA	NA	NA	NA	NA
CDC37_HUMAN	-0.0423295	-0.0933778	0.0157477	0.0153278	-0.122425	0.135344	-0.0775833	0.130006
CDC42_HUMAN	-0.0732007	0.0069219	-0.0101194	-0.000493956	0.0687376	0.0123501	-0.0123501	0.0508732
CDC5L_HUMAN	-0.0326317	0.0705322	0.00789003	0.0301562	0.00411127	0.132298	-0.0327224	0.0159354
CDD_HUMAN	NA	NA	NA	NA	NA	NA	NA	NA
CDIPT_HUMAN	NA	NA	NA	NA	NA	NA	NA	NA
CDK16_HUMAN	0.0573741	-0.0267336	-0.00179656	0.016003	-0.0948492	0.123797	-0.115974	-0.0440147
CDK4_HUMAN	0.162941	-0.00523712	0.0102073	0.00523712	-0.315666	-0.0109578	-0.116361	0.20902
CDK5_HUMAN	0.0611879	0.00530966	0.0263705	0.0176967	-0.0980197	0.145668	-0.082562	-0.0583496
CDK6_HUMAN	NA	NA	NA	NA	NA	NA	NA	NA
CDK9_HUMAN	NA	NA	NA	NA	NA	NA	NA	NA
CDKAL_HUMAN	NA	NA	NA	NA	NA	NA	NA	NA
CDN1B_HUMAN	0.0298562	0.199812	-0.27512	-0.105052	0.194648	-0.15687	-0.0742189	0.135963
CDN1C_HUMAN	-0.0501541	-0.0254569	-0.190611	0.175518	0.107253	0.196514	-0.136794	-0.092837
CDNF_HUMAN	-0.331275	-0.086561	-0.0401813	0.00910046	0.0553518	0.241906	0.242109	-0.250905
CDS2_HUMAN	-0.137271	0.0307395	0.0398496	-0.0160439	0.141269	0.166798	0.0137811	-0.0758073
CDSN_HUMAN	0.0842008	-0.0222894	0.407199	0.0527521	-0.34142	-0.0524892	-0.161298	-0.139254
CDV3_HUMAN	0.0526903	-0.106056	-0.069934	-0.0450655	-0.17475	0.104438	-0.0654393	0.168531
CE051_HUMAN	0.096352	-0.0408692	-0.159816	0.18258	0.152291	-0.0469153	-0.368461	0.0434313
CE170_HUMAN	-0.26944	0.31422	0.127801	-0.050622	-0.0625349	-0.0104185	-0.00929693	0.122883
CEAM1_HUMAN	-0.0512584	0.0594418	0.0958554	-0.00611782	0.583248	-0.221686	0.00611782	-0.0919626
CEAM6_HUMAN	NA	NA	NA	NA	NA	NA	NA	NA
CEAM8_HUMAN	NA	NA	NA	NA	NA	NA	NA	NA
CEBOS_HUMAN	-0.286702	0.0697139	0.0980056	0.206735	-0.0985428	-0.0697139	-0.1242	0.123263
CEBPZ_HUMAN	0.0020439	0.0597121	0.198381	-0.189875	0.0253918	0.0453172	-0.0264288	0.057629
CELF1_HUMAN	0.0381505	0.105653	-0.0204376	-0.257036	0.0402057	0.00104986	0.00787008	0.14656
CELF2_HUMAN	-0.152805	0.0101586	-0.226583	-0.061152	0.395021	0.222688	0.110169	0.167428
CENPV_HUMAN	0.154329	-0.0722039	-0.0232322	0.168787	-0.203531	-0.122497	0.0262455	-0.158916
CEP68_HUMAN	0.105822	-0.0259761	-0.0473254	-0.588211	0.523738	0.123139	0.0547122	-0.636664
CEP85_HUMAN	0.125784	0.134742	0.160129	-0.224188	-0.012296	0.0800818	0.012296	-0.303528
CEPT1_HUMAN	NA	NA	NA	NA	NA	NA	NA	NA
CERU_HUMAN	0.531442	0.129016	-0.306246	-0.0622082	-0.0239021	0.134664	-0.0832852	-0.141301
CETP_HUMAN	NA	NA	NA	NA	NA	NA	NA	NA
CF047_HUMAN	0.164477	0.10953	0.114869	-0.109427	-0.131153	0.0116151	-5.41e-06	-0.0674169
CF089_HUMAN	NA	NA	NA	NA	NA	NA	NA	NA
CF120_HUMAN	-0.966089	0.17783	-0.127395	0.00452991	0.0749716	0.00345544	0.190192	-0.235961
CF203_HUMAN	0.420503	-0.0302399	0.431688	0.281926	0.0302399	-0.0411873	-0.364078	-0.0479018
CFAB_HUMAN	0.427006	0.152465	-0.216679	-0.173551	-0.064907	0.109918	-0.0108499	-0.111317
CFAD_HUMAN	0.0243322	0.379228	-0.314812	-0.241165	0.126672	-0.122965	0.036923	-0.0936164
CFAH_HUMAN	0.272546	0.14924	-0.344315	-0.205305	0.128918	0.0493114	0.0580798	-0.218984
CFAI_HUMAN	0.357086	0.130852	-0.407592	-0.194761	0.0560941	0.0711022	-0.0277025	-0.166364
CG025_HUMAN	0.0409238	-0.0402222	0.0614007	-0.193177	0.0477394	-0.026262	-0.0960482	-0.0284438
CG050_HUMAN	NA	NA	NA	NA	NA	NA	NA	NA
CGAT2_HUMAN	-0.246695	-0.029853	0.0538683	-0.155414	0.149008	0.0776694	0.029853	0.165644
CGBP1_HUMAN	0.0175065	0.225402	-0.199867	-0.0203183	-0.0704086	0.0760751	0.076605	-0.00765771
CGL_HUMAN	NA	NA	NA	NA	NA	NA	NA	NA
CH082_HUMAN	0.17531	-0.18754	0.0297575	0.324019	-0.218833	-0.163717	-0.0045734	-0.0233317
CH10_HUMAN	0.0156696	-0.247791	0.376805	0.228965	-0.319771	-0.148158	0.0361682	-0.0749275
CH3L1_HUMAN	NA	NA	NA	NA	NA	NA	NA	NA
CH60_HUMAN	0.0147099	-0.178628	0.162828	0.17907	-0.194311	-0.154635	-0.0230447	0.0114943
CHAP1_HUMAN	-0.28615	0.0652158	0.103767	0.0472319	0.133929	0.0385921	-0.0385921	-0.0476617
CHC10_HUMAN	0.0198078	-0.308343	0.367906	0.117229	-0.46069	-0.168607	-0.0169387	0.0471471
CHCH1_HUMAN	-0.0209653	-0.153106	0.107339	-0.277168	-0.0668133	-0.0809189	0.120333	0.0209653
CHCH2_HUMAN	-0.165495	-0.145911	0.0777387	0.0668446	-0.330589	-0.0108473	0.0315253	0.0947147
CHCH5_HUMAN	NA	NA	NA	NA	NA	NA	NA	NA
CHCH7_HUMAN	0.308946	0.850722	-0.80005	-0.81102	0.0686828	-0.859927	-0.0686828	0.404425
CHD4_HUMAN	-0.0854995	0.145149	-0.060849	0.0653809	0.0913636	-0.00642897	0.00642897	0.0990201
CHDH_HUMAN	-0.0168492	-0.0487821	0.0111039	0.144882	-0.168902	-0.0690727	-0.0303383	0.120479
CHERP_HUMAN	0.00237052	-0.0173023	-0.038309	-0.0174263	0.0736107	0.14683	-0.103004	0.110621
CHID1_HUMAN	0.0653531	0.129559	-0.0553805	-0.0171363	0.00970112	0.0795902	-0.0578689	0.0257383
CHIP_HUMAN	0.00295487	0.00657349	0.0472332	-0.00354368	-0.10881	0.105723	-0.0067272	0.0311649
CHLE_HUMAN	0.0326096	0.0202516	-0.0746979	-0.0328832	-0.410763	0.65875	-0.0202516	-0.0661685
CHM2A_HUMAN	0.0548054	-0.0034568	0.0034568	0.0415263	-0.0691788	0.109801	-0.0415263	0.000403576
CHM4A_HUMAN	NA	NA	NA	NA	NA	NA	NA	NA
CHM4B_HUMAN	0.122376	-0.111741	0.010269	0.000240443	-0.171102	0.13014	-0.0454364	-0.00444748
CHMP3_HUMAN	0.879085	0.542435	-0.887699	-0.00452275	0.646431	0.276679	-0.20018	0.179784
CHMP5_HUMAN	-0.141821	0.0291912	0.0143908	0.0941656	0.0303622	0.0329423	-0.0441371	0.0313968
CHMP6_HUMAN	0.254665	0.0740509	-0.286169	0.0806237	-0.0743525	-0.0344793	0.0344793	-0.0156024
CHMP7_HUMAN	0.00903778	-0.0111744	0.039295	0.00511797	0.0186813	0.0206292	-0.0185771	0.0341652
CHP1_HUMAN	-0.0327014	0.0245771	0.0211614	-0.0286551	-0.00403003	-0.00179974	-0.0178409	0.0231305
CHRD1_HUMAN	0.145398	-0.080375	-0.241023	0.0827205	0.0534585	0.198984	-0.152031	-0.0330759
CHSP1_HUMAN	0.22142	0.167872	-0.261128	-0.0147121	0.716445	-0.082181	-0.0320557	-0.179628
CHTOP_HUMAN	-0.0213596	0.0661345	-0.080725	0.025539	-0.286095	0.198983	-0.106166	0.0822275
CIA30_HUMAN	0.126394	-0.0118296	0.48031	0.34987	-0.73145	-0.183351	-0.336692	-0.000886563
CIAO1_HUMAN	0.0209654	-0.123329	-0.275401	-0.0157499	0.104964	0.130943	0.0157499	-0.0284621
CIC_HUMAN	NA	NA	NA	NA	NA	NA	NA	NA
CILP1_HUMAN	0.0624205	0.132883	-0.205727	0.0442255	0.127159	0.00208322	-0.2399	0.350464
CIP4_HUMAN	-0.0613052	-0.0810965	0.0286847	0.0606797	-0.0244776	-0.102662	0.0639518	0.0554392
CIRBP_HUMAN	-0.107005	0.0475735	0.0546788	0.0057784	-0.219541	0.0115742	0.0513099	0.0347533
CISD1_HUMAN	0.033065	-0.20196	0.220119	0.133346	-0.303826	-0.298937	0.187304	-0.0471881
CISD2_HUMAN	0.0177863	-0.0107651	-0.0445571	-0.0190513	-0.0476485	0.0815016	0.0759868	-0.0221077
CISY_HUMAN	-0.0221564	-0.248291	0.239807	0.215635	-0.250216	-0.187735	0.0643573	0.000131325
CJ071_HUMAN	-0.238303	-0.153475	-0.0211761	-0.0393648	-0.204618	0.167771	0.0473162	0.0839103
CJ076_HUMAN	0.262052	-0.0273847	-0.0123147	0.323157	-0.0435532	0.0738398	0.0474318	0.0840236
CK054_HUMAN	0.0794451	-0.218441	-0.00165374	0.00204491	-0.163786	-0.00597542	0.0630482	0.0592468
CK068_HUMAN	-0.133411	-0.0781764	0.0997156	-0.247953	-0.0296568	0.0644013	-0.243843	0.0076767
CK5P2_HUMAN	NA	NA	NA	NA	NA	NA	NA	NA
CK5P3_HUMAN	0.0431556	0.105251	-0.083674	0.261594	-0.0813434	0.0250954	0.00880264	-0.170346
CKAP4_HUMAN	-0.0858082	0.295327	-0.00318615	-0.0749676	0.0602737	0.0934382	0.00281532	-0.00556469
CKAP5_HUMAN	-0.00467024	0.0374407	0.0661171	-0.00611042	0.0171017	-0.00989014	0.00989014	-0.0168103
CKLF5_HUMAN	0.353625	0.269599	0.0403466	-0.22421	0.786798	-0.0403466	0.202533	-0.314042
CKP2L_HUMAN	NA	NA	NA	NA	NA	NA	NA	NA
CL065_HUMAN	0.0256802	-0.169716	-0.0256802	0.242498	-0.0351446	-0.184251	0.157346	0.27063
CL073_HUMAN	0.00210914	-0.159153	0.24187	0.175843	-0.427192	-0.399408	0.0491873	0.0175529
CL16A_HUMAN	-0.0908986	-0.0590176	-0.031767	0.0683226	-0.0840736	0.0960306	-0.0792217	-0.00245555
CLAP1_HUMAN	0.0245997	-0.0346399	0.104977	-0.00819197	-0.051467	-0.029577	-0.0623025	-0.00169867
CLAP2_HUMAN	-0.00389449	-0.0165428	-0.0980819	0.0026345	0.0048543	0.0916917	-0.011599	-0.0245178
CLC14_HUMAN	0.0722919	0.00385655	-0.159389	0.250227	0.380904	0.122563	-0.0791049	-0.0483828
CLCB_HUMAN	0.106178	-0.0465981	-0.0318062	-0.178326	0.0306691	0.175112	-0.0214564	0.0886509
CLCC1_HUMAN	-0.0124288	0.041816	0.104999	-0.0674649	-0.0842176	0.145111	-0.00497966	-0.0120729
CLCN1_HUMAN	NA	NA	NA	NA	NA	NA	NA	NA
CLD5_HUMAN	NA	NA	NA	NA	NA	NA	NA	NA
CLH1_HUMAN	-0.00169686	0.0485307	-0.0714655	0.0586456	0.133931	0.00979216	-0.0293796	-0.00592274
CLH2_HUMAN	-0.484979	-0.00623196	0.108966	0.201998	-0.200307	0.000435508	0.0324267	0.168293
CLIC1_HUMAN	0.152617	0.0491624	-0.0733374	-0.0143339	0.498943	-0.0140656	-0.0300253	-0.146512
CLIC2_HUMAN	0.119338	0.0410991	-0.0836525	0.195731	-0.0822717	0.011286	-0.0814911	-0.0369882
CLIC4_HUMAN	-0.00789261	0.00452599	-0.0208825	0.229167	0.0108194	0.160993	-0.129214	-0.0330188
CLIC5_HUMAN	0.229351	-0.170642	0.0185588	0.101138	-0.250114	0.0104125	-0.0690219	0.0158945
CLIP1_HUMAN	-0.0762417	0.00392572	0.0269274	-0.0546778	-0.161321	0.209591	-0.0155907	0.102193
CLIP2_HUMAN	NA	NA	NA	NA	NA	NA	NA	NA
CLN6_HUMAN	NA	NA	NA	NA	NA	NA	NA	NA
CLP1L_HUMAN	-0.00862555	0.138049	0.1204	0.130503	0.129739	0.00862555	-0.0436298	-0.0981011
CLPB_HUMAN	0.00459473	-0.0891755	0.146826	0.0626397	-0.0672967	-0.0640931	-0.00459473	-0.0156984
CLPP_HUMAN	0.0685719	-0.204923	0.130653	-0.049668	-0.13771	0.0276201	0.00127163	-0.0686464
CLPT1_HUMAN	0.0290334	-0.0191403	0.0908588	-0.0413045	-0.148599	-0.12104	-0.00656181	-0.02004
CLPX_HUMAN	0.0500698	-0.163487	0.121876	0.100479	-0.238919	-0.0247678	-0.0569955	0.0733863
CLU_HUMAN	0.0231906	0.0527123	0.0894502	0.0601566	-0.0301968	-0.0688733	-0.0969712	0.0267751
CLUS_HUMAN	0.220415	0.123358	-0.193093	-0.170523	0.415098	-0.0435022	0.00455449	-0.0685883
CLYBL_HUMAN	0.123339	-0.254779	0.0928053	0.120225	-0.172486	-0.400777	0.109616	-0.0835612
CMA1_HUMAN	-0.0461263	0.127424	-0.0133788	0.249572	0.427196	-0.769438	-0.312706	0.0507737
CMBL_HUMAN	0.135891	0.0216344	-0.136284	0.129063	-0.175075	0.256695	-0.204518	-0.0274834
CMC1_HUMAN	0.041852	-0.165287	0.188801	0.292664	-0.285185	-0.259541	0.102549	-0.070166
CMC2_HUMAN	-0.197177	0.338865	-0.351573	0.41778	-0.0645633	0.140259	0.0645633	0.110831
CMC4_HUMAN	-0.063725	-0.0732586	0.465186	0.1693	-0.186302	-0.0234235	0.383322	-0.00369412
CMPK2_HUMAN	0.0481393	-0.0946813	0.142145	-0.0985754	-0.0701725	0.307303	0.0231751	-0.0705299
CMTD1_HUMAN	0.0091659	-0.112012	0.0914061	-0.0994451	0.0854182	-0.268683	-0.0244186	-0.0315932
CMTR1_HUMAN	NA	NA	NA	NA	NA	NA	NA	NA
CMYA5_HUMAN	-0.00296648	-0.146785	0.139705	0.0246656	-0.248776	0.0335672	-0.00985088	-0.100903
CN37_HUMAN	-0.0199879	0.099791	-0.0913581	0.332477	0.0429606	-0.0125906	-0.0599681	-0.0665667
CNBP_HUMAN	-0.25179	-0.0346744	0.0103154	0.346977	-0.00955339	0.0182047	0.174849	0.195236
CNDP2_HUMAN	0.00637098	-0.0775393	-0.0342041	0.0661311	-0.0608565	0.0636135	-0.0757278	0.108443
CNEP1_HUMAN	0.29476	0.0998148	-0.284159	-0.0602978	0.47626	0.0602978	0.217695	-0.230607
CNIH4_HUMAN	-0.0280827	-0.00748679	0.0931314	-0.051082	0.231769	-0.0288264	0.00748679	-0.0603717
CNKR1_HUMAN	-0.205077	0.390906	0.188415	-0.112337	0.513037	0.320546	-0.251483	-0.126224
CNN1_HUMAN	0.398775	1.56117	-0.128375	-0.313749	0.264531	-0.263946	-0.190397	0.112176
CNN2_HUMAN	0.12766	0.113698	-0.126239	-0.0678366	0.615179	-0.0641225	0.0063829	-0.0803609
CNN3_HUMAN	-0.138735	0.433055	-0.0155606	0.116398	-0.00498734	0.043422	-0.222035	0.0782358
CNNM4_HUMAN	-0.28226	-0.00978274	0.155224	-0.052803	-0.0742486	0.015753	0.144441	0.207775
CNO10_HUMAN	0.118646	-0.121449	0.335118	-0.0171051	-0.181655	0.12734	0.0171051	-0.333952
CNOT1_HUMAN	-0.0320263	0.00247259	0.0653876	-0.043325	-0.0035664	0.190399	-0.0779951	0.130516
CNOT4_HUMAN	0.101334	0.0160634	-0.0196526	0.00756023	0.178183	-0.0113752	-0.0726874	-0.0900829
CNOT7_HUMAN	NA	NA	NA	NA	NA	NA	NA	NA
CNOT9_HUMAN	0.0231004	0.105876	0.227586	0.11348	-0.581146	-0.328736	-0.100854	-0.271087
CNPY2_HUMAN	0.185009	0.143251	-0.0408644	-0.0272404	0.0206996	-0.0132531	-0.0699472	0.129998
CNPY3_HUMAN	0.0191185	0.0653489	0.0169543	-0.173229	0.5497	0.0640947	-0.0130936	-0.0167716
CNRP1_HUMAN	0.26242	0.192237	-0.241225	-0.0327216	0.849334	-0.1186	-0.0587174	-0.121686
CNST_HUMAN	0.00506318	-0.00875186	-0.248378	0.0300175	0.16812	0.0398038	0.0568418	-0.201018
CO2_HUMAN	0.600088	0.252072	-0.511452	-0.28089	0.856946	-0.116357	-0.102228	-0.171936
CO2A1_HUMAN	-0.050976	0.050976	-0.519926	0.767516	1.69302	0.0644859	0.064031	-0.0845862
CO3_HUMAN	0.475107	0.127358	-0.350516	-0.449429	0.13429	0.101636	-0.0211159	-0.258684
CO3A1_HUMAN	0.19871	0.0114015	-0.0862551	0.0784744	0.579774	-0.212338	0.0116271	0.183394
CO4A_HUMAN	0.155805	0.239525	-0.328481	-0.664127	0.267639	-0.00931049	-0.0252799	-0.157862
CO4A1_HUMAN	-0.0945052	0.0361542	-0.0559753	0.0604655	0.2445	-0.07279	-0.109368	0.0851075
CO4A2_HUMAN	-0.029645	0.146115	-0.251342	0.0990808	0.497458	-0.000222556	-0.328816	0.405935
CO4B_HUMAN	0.0350602	0.296324	-0.234078	-0.143884	0.32092	0.0529635	0.0248674	-0.0218296
CO5_HUMAN	0.282885	0.198153	-0.310893	-0.124731	0.199747	-0.0187373	0.00962239	-0.0395718
CO5A3_HUMAN	0.128623	0.239882	-0.173718	0.00863288	0.281002	-0.126947	0.0814309	-0.00863288
CO6_HUMAN	0.508448	0.107535	-0.200377	-0.256062	0.0260453	0.115291	-0.203404	-0.05422
CO6A1_HUMAN	-0.025444	0.22182	-0.12414	0.114157	0.0732735	-0.0855893	-0.0206542	-0.0900254
CO6A2_HUMAN	-0.0393418	0.192496	-0.0904864	0.13015	0.0496181	-0.0866119	-0.0159084	-0.0515709
CO6A3_HUMAN	-0.0141425	0.257542	-0.103189	0.102856	0.077925	-0.0774771	-0.018103	-0.112976
CO6A6_HUMAN	0.0704898	0.201817	-0.350077	0.505655	0.89929	-0.15527	-0.261577	-0.468923
CO7_HUMAN	0.27548	-0.171056	-0.193123	-0.0915816	0.0648387	0.0332192	0.00803643	-0.109187
CO8A_HUMAN	0.116471	0.0367347	-0.205868	-0.0646517	-0.00667831	0.0711101	-0.0363417	-0.0797653
CO8B_HUMAN	0.308332	-0.0749297	-0.120962	0.0953862	-0.00940228	-0.0282745	0.049248	-0.118222
CO8G_HUMAN	0.248556	0.0816575	0.0545707	-0.0338459	-0.0876069	0.0790185	-0.189753	-0.00906449
CO9_HUMAN	0.395377	-0.000599919	-0.46461	-0.0402567	0.213401	0.0956751	-0.00154686	0.143724
COA1_HUMAN	-0.0826902	-0.1516	0.376378	0.0826902	-0.415487	-0.114146	0.18564	0.0981021
COA3_HUMAN	-0.020747	-0.057586	0.0627988	0.16338	-0.381052	-0.380637	0.453211	0.0347178
COA4_HUMAN	-0.176908	0.0260769	0.702062	-0.396287	2.37693	-0.113565	-0.0260769	-0.736644
COA5_HUMAN	0.0321548	-0.197983	0.0213846	0.433613	-0.529431	-0.228291	1.00051	-0.0394188
COA6_HUMAN	-0.0136518	-0.397907	0.197514	0.269307	-0.137928	-0.311928	0.21788	-0.0776649
COA7_HUMAN	0.238692	-0.176619	0.433464	0.15853	-0.551412	-0.226311	0.176619	-0.0703288
COAC_HUMAN	0.0744315	-0.0810195	-0.0969241	0.0736109	-0.0621798	-0.143693	0.0102941	0.00551141
COASY_HUMAN	0.0340859	0.024371	0.0958519	-0.000744197	0.0494148	-0.0602057	-0.018882	-0.135294
COBL_HUMAN	0.0149375	0.235002	-0.105485	-0.148596	-0.0456665	0.0332324	0.147842	0.0451137
COBL1_HUMAN	-0.0168197	0.043707	-0.0446582	0.0710185	0.030385	-0.0287711	-0.134425	0.0667198
COCA1_HUMAN	-0.0418133	0.529695	-0.123483	0.0443597	0.0118757	-0.0752368	0.0964333	-0.126394
COEA1_HUMAN	0.160875	1.00645	-0.0754536	0.0811691	0.367243	-0.259178	0.019393	-0.192686
COF1_HUMAN	0.128448	-0.0005507	-0.134659	0.00545456	0.141021	0.152644	-0.187144	-0.00543047
COF2_HUMAN	0.0135467	-0.0354459	0.0344721	0.0114484	-0.330878	0.0736554	-0.063053	0.0341242
COFA1_HUMAN	0.0740568	0.000956175	0.129913	0.118709	-0.0169983	0.0902722	-0.077452	-0.151919
COG1_HUMAN	-0.0676496	-0.0170639	0.00693108	0.00862844	-0.0394213	0.083867	0.00491732	-0.0373007
COG2_HUMAN	-0.186258	0.215369	0.0222064	0.000891487	0.158667	0.0101094	-0.0895037	0.0735553
COG3_HUMAN	-0.057641	0.242011	-0.00879633	-0.0421531	0.163433	-0.218477	0.256004	-0.10828
COG4_HUMAN	NA	NA	NA	NA	NA	NA	NA	NA
COG5_HUMAN	-0.110817	0.253661	0.0224075	-0.102251	-0.0261339	0.0676528	-0.0103779	-0.0112736
COG6_HUMAN	-0.0129364	0.190307	-0.237256	0.0129364	0.0163975	0.221218	-0.24648	-0.182717
COG7_HUMAN	0.0455687	0.0570906	-0.137555	0.276027	0.205228	-0.238414	-0.0150619	0.0608116
COG8_HUMAN	-0.204291	0.132738	0.293665	-0.010193	0.54035	0.179765	-0.0469759	-0.0897224
COIA1_HUMAN	-0.0649448	0.131409	0.0195491	-0.0621236	-0.0372744	0.0284839	0.0570152	0.00935782
COIL_HUMAN	0.0319912	0.216224	0.0135942	-0.075076	0.0940982	-0.00613567	-0.143268	0.0555725
COMD3_HUMAN	-0.141188	-0.0829448	0.226242	-0.00945935	-0.152501	0.0520445	0.217968	-0.0313288
COMD4_HUMAN	-0.0329388	-0.0453342	0.126752	0.179749	-0.0584242	0.0557381	-0.0541859	-0.166921
COMD5_HUMAN	-0.085204	-0.102806	-0.0394754	0.046663	-0.123642	0.0401974	0.0394754	0.0882035
COMD6_HUMAN	-0.199165	-0.230647	0.254177	0.229586	-0.0764733	0.245826	-0.0769218	-0.0617178
COMD7_HUMAN	0.00394845	-0.369374	0.149651	0.438728	0.0634839	-0.00394845	0.052932	-0.0620337
COMD8_HUMAN	-0.125589	0.212759	0.36794	0.244006	0.141963	-0.454362	-0.327274	-0.159903
COMD9_HUMAN	0.19297	-0.155183	0.0749188	0.0827887	-0.225696	0.142697	-0.0317071	-0.0678319
COMDA_HUMAN	-0.031881	-0.124445	0.0217147	0.152342	-0.0707387	0.0286967	0.0953322	0.116915
COMP_HUMAN	0.00925259	0.297115	0.122987	-0.174693	0.207212	-0.256482	0.376742	-0.227641
COMT_HUMAN	-0.0772464	-0.00253807	-0.0530209	0.0146431	0.0464878	0.25569	-0.149829	0.0431525
COPA_HUMAN	-0.0271184	0.042628	-0.0320496	0.063444	0.00842014	-0.0330936	-0.0257046	0.0231496
COPB_HUMAN	-0.020839	0.0426871	-0.048479	0.00277428	-0.0150834	0.0582344	0.0116551	0.0153034
COPB2_HUMAN	-0.0393045	0.141344	-0.0121305	0.0426355	-0.0480349	-0.0259844	0.0050805	0.0254305
COPD_HUMAN	0.00761704	0.108558	-0.0789437	-0.0535336	-0.0386108	0.0691855	-0.0337576	0.0609818
COPE_HUMAN	0.0319958	0.0143755	-0.040622	0.016519	-0.0367719	-0.0155791	-0.0555725	0.109678
COPG1_HUMAN	0.0117224	0.100881	0.00657585	0.064556	-0.00657585	0.0203112	-0.0748763	-0.0011011
COPG2_HUMAN	-0.0178662	0.0768599	-0.0373126	-0.0028486	0.0337886	0.0697944	-0.0283226	-0.0404696
COPZ1_HUMAN	0.0280083	0.00348404	0.0675123	-0.0041957	0.0903446	0.201169	-0.195513	0.108764
COPZ2_HUMAN	-0.122524	0.127654	-0.0417344	-0.0621274	-0.162585	0.354538	-0.0525435	0.253215
COQ3_HUMAN	0.0500724	-0.258572	0.219131	0.142257	-0.283857	-0.178386	0.00960414	0.0476992
COQ5_HUMAN	0.0297999	-0.291816	0.151024	0.0669025	-0.222871	-0.14769	0.103424	0.00315298
COQ6_HUMAN	-0.0106497	0.00305325	0.138358	0.0966279	-0.0422799	-0.213767	0.0106497	0.0369532
COQ7_HUMAN	0.042804	-0.204893	0.0424177	0.119886	-0.244992	-0.00468421	0.021401	0.0194701
COQ8A_HUMAN	-0.109438	-0.332829	0.129377	0.139191	-0.178876	-0.300519	0.0587146	0.0852438
COQ9_HUMAN	0.0437885	-0.187406	0.10761	0.139151	-0.0361085	-0.264158	0.0375159	-0.000309613
COR1A_HUMAN	0.203186	0.238893	-0.115665	-0.230603	1.28789	-0.0846395	-0.0467977	-0.29372
COR1B_HUMAN	-0.00514357	0.209867	-0.0745028	0.0259408	0.108169	-0.0667109	-0.138649	0.126346
COR1C_HUMAN	0.106809	0.545998	-0.0592507	-0.115909	0.710884	-0.0216443	-0.0664291	-0.0537579
CORO6_HUMAN	-0.0434524	-0.00299912	0.07078	0.0462688	-0.0312885	0.138671	0.010852	-0.0311683
CORO7_HUMAN	-0.0175389	0.0281973	-0.229844	0.0658839	0.116972	-0.108689	0.00373946	-0.159855
COTL1_HUMAN	-0.0434712	0.00588563	0.0341116	0.0418644	-0.00588563	-0.802005	0.0505564	-0.176776
COX1_HUMAN	-0.0183977	-0.182496	0.100353	0.24685	-0.221448	-0.360875	0.0890322	0.0449768
COX11_HUMAN	-0.0113233	-0.109738	0.118196	-0.102592	0.0414597	-0.087377	0.142503	-0.0136365
COX15_HUMAN	-0.0982283	0.0628711	0.173828	0.10667	0.411488	-0.226147	0.0733267	0.00112898
COX19_HUMAN	-0.0133378	-0.212465	0.0251053	0.167122	-0.259383	-0.168915	0.120095	-0.0555665
COX2_HUMAN	-0.025197	-0.254526	0.376025	0.257581	-0.348657	-0.326912	0.0662948	0.0286765
COX20_HUMAN	0.10148	-0.0705131	0.115944	0.190068	-0.168503	-0.162835	0.129943	-0.0555292
COX41_HUMAN	0.0106806	-0.352125	0.33375	0.362038	-0.461437	-0.439627	0.0605896	0.0793092
COX5A_HUMAN	-0.00929752	-0.273206	0.299101	0.21309	-0.152053	-0.334679	0.0898159	-0.0311879
COX5B_HUMAN	-0.0788007	-0.183171	0.410919	0.0361945	-0.243194	-0.219178	0.0459015	0.0272206
COX7C_HUMAN	0.118542	-0.255454	0.300574	0.151352	-0.317591	-0.281006	0.0151019	0.028053
COX7R_HUMAN	-0.34641	-0.203721	0.202793	0.317302	-0.233833	-0.715555	0.0733624	0.282785
COXM1_HUMAN	-0.0610367	-0.440059	0.200182	0.151166	-0.576136	-0.534156	0.166215	0.111124
CP062_HUMAN	-0.0595154	-0.0103068	0.09129	0.111871	0.00643492	0.0431681	0.00257409	-0.098764
CP20A_HUMAN	-0.443907	0.159348	0.153809	-0.0186174	0.153592	-0.132741	-0.0712815	-0.0764464
CP27A_HUMAN	-0.100694	-0.0615254	0.163806	0.140932	0.298033	-0.173325	0.0436179	-0.0704002
CP2J2_HUMAN	-0.648409	-0.0325479	0.250165	0.0774997	0.859579	0.0450329	0.0426922	0.200144
CP51A_HUMAN	NA	NA	NA	NA	NA	NA	NA	NA
CPEB3_HUMAN	0.0510262	-0.207302	-0.034978	0.034978	0.136265	-0.0475511	0.0395465	0.0603178
CPIN1_HUMAN	0.140295	-0.0668074	0.0269389	0.181999	0.0102915	-0.253735	-0.025437	0.0909334
CPN2_HUMAN	0.448008	0.0649478	-0.247593	-0.133018	0.527897	-0.114558	-0.0239273	-0.281697
CPNE1_HUMAN	0.245034	0.259388	-0.301876	-0.224972	0.427789	-0.0740365	0.0476408	-0.367425
CPNE2_HUMAN	-0.221789	0.13564	-0.093194	0.00289599	-0.0562725	-0.0283881	-0.151886	0.111432
CPNE3_HUMAN	0.0826743	0.0837688	-0.092443	0.00743319	0.11263	0.132626	-0.0223686	-0.0826711
CPNS1_HUMAN	-0.0053851	0.0143328	-0.0640673	0.0384568	0.0499168	0.0502626	-0.0676232	0.0279244
CPPED_HUMAN	0.141685	0.01398	0.183585	-0.0494952	-0.0304672	0.565131	-0.132656	-0.339444
CPSF1_HUMAN	0.341878	0.129575	-0.0553984	0.0348186	0.0365617	-0.0789924	-0.0253709	0.0503126
CPSF2_HUMAN	0.133743	0.0915995	-0.109974	-0.131668	0.13517	0.142737	-0.210258	0.05288
CPSF5_HUMAN	-0.0383923	0.0294291	-0.027277	-0.0613747	-0.112186	0.152264	0.0365175	0.0856149
CPSF6_HUMAN	-0.139161	0.0472011	-0.0123055	-0.00509972	-0.00405815	0.199832	-0.0881553	0.270374
CPSF7_HUMAN	-0.0564094	0.169504	-0.117375	0.112672	0.0330102	0.144048	-0.0285596	0.0430748
CPSM_HUMAN	-0.466202	0.800081	-0.764688	-0.693915	1.32263	-0.030196	1.89246	0.0185873
CPT1A_HUMAN	NA	NA	NA	NA	NA	NA	NA	NA
CPT1B_HUMAN	-0.0663605	-0.0132121	0.0284586	0.22431	-0.112206	-0.22479	0.0132121	0.0960801
CPT2_HUMAN	-0.0549511	-0.131254	0.0834562	0.19477	-0.229526	-0.170875	0.0426006	0.0851187
CPTP_HUMAN	-0.125941	-0.0189657	0.171522	0.0894508	0.0499465	-0.0913696	-0.0549956	0.0235336
CPVL_HUMAN	-0.425544	0.308234	0.850719	0.465605	-0.0823516	-0.239763	-0.0282438	-0.0245551
CPZIP_HUMAN	-0.268087	-0.138472	0.0356103	0.0663132	-0.0933986	-0.0750443	-0.0891073	0.160086
CQ10A_HUMAN	0.159354	-0.197407	0.229006	0.57846	-0.215439	-0.392994	0.149181	-0.230649
CQ10B_HUMAN	0.000888013	-0.106369	0.0987876	0.0598245	0.132343	0.0242859	0.146146	0.0711021
CR025_HUMAN	0.246942	-0.0431	0.304671	0.121317	-0.0225579	-0.229043	-0.111553	0.0319721
CRAC1_HUMAN	-0.232563	0.116847	0.258663	-0.115261	-0.213375	0.250691	-0.00439693	0.460469
CRADD_HUMAN	0.174544	-0.0209637	-0.0493276	-0.0882752	0.011162	0.0667096	-0.0712511	0.0676621
CRBG3_HUMAN	0.0556063	0.112806	0.165374	0.211829	0.00599902	0.147001	-0.196163	-0.107978
CRBN_HUMAN	-0.119044	-0.0463244	-0.0262193	0.051999	-0.00625022	0.0118661	-0.0340095	0.0215576
CREL1_HUMAN	-0.0379992	0.0710792	-0.240751	0.117866	0.0441385	-0.00139253	-0.0153668	0.0937018
CRIP2_HUMAN	-0.0441135	0.170621	-0.0354558	0.0352655	-0.249259	0.00564925	0.00271821	0.0892294
CRK_HUMAN	0.0213304	0.00263268	0.00372425	-0.0081235	-0.0225247	0.0313625	-0.0436794	0.105436
CRKL_HUMAN	-0.0332383	-0.0324671	-0.00768812	-0.0379766	-0.00133506	0.114925	-0.0501455	0.0386271
CRLF3_HUMAN	0.279556	0.0752583	-0.0285219	-0.126247	0.628863	-0.171068	-0.100769	0.0285219
CRNS1_HUMAN	0.010191	-0.00340446	0.251361	0.0272636	-0.18758	0.0216385	-0.108204	-0.151223
CRTC1_HUMAN	-0.648585	0.293006	0.126341	-0.0145762	0.368284	0.0862379	-0.892002	-0.00595403
CRYAB_HUMAN	-0.0391538	0.0557526	0.123032	-0.0397041	-0.014141	0.0954809	-0.0774101	0.0873771
CRYL1_HUMAN	-0.000504622	-0.0831084	-0.022521	0.0143742	-0.225513	0.000504622	-0.0620522	0.436355
CRYM_HUMAN	-0.228103	-0.100312	-0.00446972	1.54566	-0.131112	-0.0485458	-0.0159868	1.50072
CS012_HUMAN	0.107726	-0.0936395	-0.013181	0.0161158	-0.130938	-0.0158636	-0.0658172	0.081074
CS025_HUMAN	0.134891	0.0687049	-0.279399	0.0884026	0.65006	-0.0190289	0.164038	-0.264931
CSCL2_HUMAN	0.0739293	0.103239	0.0155815	-0.00453148	-0.0731794	0.0644895	-0.165732	0.00453148
CSDE1_HUMAN	-0.0216591	0.0132535	0.0608441	-0.0278537	-0.24452	0.0910791	-0.0159984	0.0587036
CSK_HUMAN	0.247386	0.0661195	-0.581148	-0.090879	0.439234	0.0193054	-0.234346	0.133588
CSK21_HUMAN	-0.0135423	-0.0553776	0.0603801	0.00395291	-0.0933092	0.056082	-0.000601865	0.0431068
CSK22_HUMAN	-0.137007	0.221865	0.0612309	0.059583	-0.0945705	0.129173	0.0482307	-0.0216857
CSK2B_HUMAN	-0.0668083	-0.00772617	0.0139592	-0.0143125	0.00244024	0.0514717	-0.0139592	0.0249757
CSKI2_HUMAN	-0.327914	0.0812959	0.585184	-0.0603928	-0.462384	0.413419	-0.0778653	-0.452555
CSKP_HUMAN	0.266561	1.04868	0.192677	0.118861	-0.048911	-0.0907664	-0.284539	-0.464636
CSN1_HUMAN	0.0661604	0.00233259	-0.189324	-0.0387994	0.0246766	0.0661572	-0.00184109	-0.000519252
CSN2_HUMAN	-0.0127613	-0.0526689	-0.02889	0.023129	0.0133065	0.0799114	0.0127613	0.0501325
CSN3_HUMAN	-0.0765914	-0.0548254	-0.00163923	0.0287459	-0.0259192	0.0525637	0.0106563	0.0141398
CSN4_HUMAN	0.0276286	-0.00572146	-0.0723235	0.0160198	0.0102256	0.0394902	-0.00848553	0.0304583
CSN5_HUMAN	-0.02152	-0.0807305	-0.0112439	0.00317634	-0.08477	0.0723347	-0.0417709	0.119834
CSN6_HUMAN	0.0821608	0.0106221	-0.0990137	0.149842	-0.0350693	0.0828189	-0.0114085	-0.0326627
CSN7A_HUMAN	0.00480223	-0.034967	-0.00766302	0.0270375	-0.104865	0.0170615	0.024977	0.0617531
CSN7B_HUMAN	0.131748	-0.0406634	-0.061538	-0.0214807	-0.0788234	0.213867	-0.0500446	-0.019626
CSN8_HUMAN	0.0141652	-0.105372	-0.00704827	-0.0364939	-0.010433	0.0377948	-0.008389	0.0479968
CSN9_HUMAN	0.26788	-0.00989111	0.102371	0.00989111	0.0242901	-0.0605869	-0.84268	-0.241749
CSPG2_HUMAN	-0.0919158	0.445386	0.0259811	0.558224	-0.0841672	0.143435	-0.105024	-0.0121934
CSPG4_HUMAN	-0.0177463	0.124215	0.126489	0.0142945	-0.0402365	0.0014631	-0.0388587	-0.00100351
CSRP1_HUMAN	0.131576	0.406415	-0.0106971	0.0137767	-0.0362924	-0.00201105	-0.176898	0.00419361
CSRP2_HUMAN	0.148275	0.462893	-0.00134214	-0.0815615	0.0834516	0.0807016	-0.10516	-0.027757
CSRP3_HUMAN	0.131427	-0.184203	-0.00484612	0.0284201	-0.0864044	-0.0249032	0.0340102	0.116299
CT024_HUMAN	-0.240296	-0.0126252	0.201238	0.397003	-0.110411	-0.0184153	0.0126252	-0.169585
CT027_HUMAN	0.056639	0.0335829	-0.173516	0.101302	-0.0175569	0.147318	-0.13289	-0.159634
CTBP1_HUMAN	0.0963992	-0.0244413	-0.00745533	-0.0185579	0.00805827	0.0939083	-0.100656	0.0494807
CTBP2_HUMAN	-0.429927	0.261259	0.385772	0.530091	0.248572	0.646993	-0.248572	-0.33698
CTCF_HUMAN	0.219329	0.248173	-0.105886	0.000902295	-0.000902295	0.0401752	-0.0401752	0.0073651
CTF1_HUMAN	0.0629975	-0.00876699	-0.137182	-0.0306867	0.00876699	0.0315656	-0.115605	-0.0700099
CTL1_HUMAN	0.220243	-0.20414	-0.180668	0.0610927	0.467712	-0.0814138	-0.453775	-0.0811826
CTL2_HUMAN	-0.0868996	0.214939	-0.12366	-0.160027	-0.0280016	0.0270928	0.00195698	0.106244
CTNA1_HUMAN	-0.0416992	0.0583559	-0.00683484	0.182301	-0.0228546	-0.057005	0.0153928	-0.0511921
CTNA3_HUMAN	-0.107595	0.177822	-0.0985912	0.0719238	0.0758292	0.0966812	-0.0331475	0.110787
CTNB1_HUMAN	-0.152883	-0.0176437	-0.0402938	0.0974857	-0.032121	6.22e-05	0.0066242	-0.0351432
CTND1_HUMAN	0.0381022	0.0557935	0.0191974	0.0112752	0.00060775	-0.0374651	-0.0268825	-0.0976231
CTR9_HUMAN	NA	NA	NA	NA	NA	NA	NA	NA
CTU2_HUMAN	NA	NA	NA	NA	NA	NA	NA	NA
CUED1_HUMAN	-0.287332	0.108822	-0.100955	-0.121186	-0.258252	0.110159	0.0792782	0.340568
CUL1_HUMAN	-0.0145258	0.000909968	-0.0704044	0.147515	-0.0688256	0.0318564	-0.0435752	-0.0159011
CUL2_HUMAN	0.0816966	0.0254158	-0.0143592	0.00063369	0.0152021	-0.00063369	-0.011496	-0.043408
CUL3_HUMAN	0.0566673	-0.0140187	-0.0874985	-0.00643692	0.00548316	0.163364	0.0208134	-0.0677264
CUL4A_HUMAN	0.0799427	0.032786	-0.267869	0.304954	-0.190596	0.062259	-0.0865801	0.0296206
CUL5_HUMAN	0.0584884	-0.00987931	-0.128887	0.0759123	-0.0799211	-0.00250863	-0.00773098	0.0470823
CUTA_HUMAN	-0.288197	-0.0291053	-0.0169753	-0.156932	0.0382756	0.140381	-0.0253035	-0.0173173
CUTC_HUMAN	0.0303944	-0.0342575	-0.10078	0.0213056	-0.0881825	0.0716764	0.0178762	0.106318
CWC15_HUMAN	-0.763138	0.120734	0.562329	0.74429	0.788558	-0.289867	-0.356665	-0.701307
CWC27_HUMAN	-0.0847356	0.21262	-0.148571	0.152591	0.128967	0.148904	-0.301238	0.0276923
CX6A1_HUMAN	-0.146791	-0.201959	0.179759	0.0302332	-0.0142282	-0.125646	-0.0113877	-0.181651
CX6A2_HUMAN	-0.0241396	-0.30804	0.0614815	0.206101	-0.0780208	-0.186902	0.0264534	0.0033564
CX6B1_HUMAN	-0.0962146	-0.23027	0.190825	0.211277	-0.175426	-0.154708	0.000530727	0.0772419
CX7A1_HUMAN	-0.0280844	-0.364271	0.66619	0.153405	-0.361089	-0.365754	0.103899	0.027144
CX7A2_HUMAN	0.0112936	-0.0964185	0.747102	0.206911	-0.597392	-0.397911	0.313106	-0.0360464
CXCL7_HUMAN	0.249609	0.485807	-0.283711	-0.410538	0.763371	0.00495139	-0.0104729	-0.592433
CY1_HUMAN	-0.0258379	-0.266592	0.215058	0.218307	-0.349242	-0.289646	0.0753995	0.0347218
CY24B_HUMAN	-0.483672	0.645937	-0.313466	-0.139284	1.69554	0.0120518	-0.479903	0.337111
CYB_HUMAN	NA	NA	NA	NA	NA	NA	NA	NA
CYB5_HUMAN	-0.00450352	0.0188883	0.0568843	0.132317	0.0537084	-0.00736046	0.055689	-0.22746
CYB5B_HUMAN	0.0626217	-0.0428726	0.0440215	0.0137849	0.0151774	-0.159416	-0.00325317	0.100797
CYBP_HUMAN	0.0742721	-0.00459795	-0.0640901	0.0456371	-0.233775	0.150145	-0.166493	0.0165074
CYC_HUMAN	-0.0214179	-0.447624	0.447144	0.342861	-0.598632	-0.571075	0.111468	0.0764209
CYFP1_HUMAN	-0.108664	-0.047962	-0.0238765	-0.0236904	0.116225	0.00632862	-0.110955	-0.201997
CYGB_HUMAN	0.387208	0.0482206	0.125047	-0.304075	-0.0610782	0.199973	-0.123189	0.00204127
CYH1_HUMAN	0.00289699	0.00906858	0.0236936	-0.0142831	-0.123435	-0.020863	-0.00540674	0.122032
CYH2_HUMAN	NA	NA	NA	NA	NA	NA	NA	NA
CYLD_HUMAN	0.0344955	-0.0228142	-0.0060828	-0.0727872	-0.0123402	0.0647914	0.051019	0.028781
CYTA_HUMAN	NA	NA	NA	NA	NA	NA	NA	NA
CYTB_HUMAN	0.0463911	-0.0745202	-0.0469712	-0.0628351	-0.0362226	0.164219	-0.163361	0.170399
CYTC_HUMAN	-0.106636	-0.152756	0.138704	0.117486	-0.294461	0.0347681	0.0212001	0.0202116
CYTSA_HUMAN	NA	NA	NA	NA	NA	NA	NA	NA
D2HDH_HUMAN	0.154666	-0.23343	-0.228063	0.254297	-0.162849	-0.132239	-0.0341614	0.0193679
D39U1_HUMAN	-0.0159018	-0.0656129	-0.0680668	0.149101	-0.0700467	-0.240188	-0.0875559	0.0163752
DAAF5_HUMAN	0.00815274	-0.0975193	-0.0547542	0.319896	-0.061441	0.109117	-0.056595	0.0277864
DAAM1_HUMAN	0.118286	0.107606	0.13983	-0.113013	0.874893	-0.0403411	-0.221903	-0.436236
DAB2_HUMAN	0.236442	0.497024	0.102693	-0.0375587	-0.12696	-0.514957	-0.121292	-0.0545621
DAF_HUMAN	0.171498	0.0727091	-0.0991033	-0.254029	0.0664128	-0.227557	-0.00214949	-0.193962
DAG1_HUMAN	-0.0288864	0.007677	-0.00255543	-0.0314772	-0.0921857	0.169064	0.100856	-0.00149438
DAPK2_HUMAN	-0.223838	0.054981	-0.166784	0.0382039	-0.0223257	0.00412544	-0.0561581	0.04879
DAZP1_HUMAN	0.0760088	0.0109487	-0.115581	0.0579395	0.0154384	-0.00578669	-0.103778	0.0180078
DBLOH_HUMAN	0.109733	-0.103252	0.172551	0.0866074	0.162257	-0.246559	-0.186272	-0.197722
DBNL_HUMAN	-0.0122997	0.0284647	-0.0682922	-0.0678738	0.23162	0.171067	-0.106218	-0.13485
DC1I2_HUMAN	-0.00370192	-0.0389211	0.0367804	-0.0716011	-0.0416599	0.0420829	0.00265196	0.0818598
DC1L1_HUMAN	-0.0232844	0.0138038	0.0435483	-0.0654372	-0.106037	0.230151	-0.0150917	0.033336
DC1L2_HUMAN	0.00151426	-0.0434648	0.00753235	-0.0363679	-0.0369481	0.135717	0.00593647	0.0162014
DCA11_HUMAN	-0.0164863	-0.0214742	-0.0455663	0.141274	0.0641947	0.172864	-0.115364	-0.0130516
DCA13_HUMAN	0.402636	0.516337	-0.151906	-0.10523	0.523572	-0.0649749	-0.506828	-0.706988
DCAF1_HUMAN	0.0052387	0.0281528	-0.065437	0.0187338	0.159678	0.107164	-0.141355	0.0150571
DCAF6_HUMAN	-0.0239157	-0.00703658	-0.0887826	0.0397712	-0.231442	0.0871613	0.0239157	0.124758
DCAF7_HUMAN	0.101142	-0.0488492	0.107166	-0.00973319	-0.0739362	-0.0206514	0.0187196	0.0335957
DCAF8_HUMAN	-0.00471221	0.00604112	-0.0127829	-0.0763911	-0.0248503	-0.00285017	-0.00186415	0.0381147
DCAKD_HUMAN	0.0251465	0.00156276	-0.150196	0.0950915	0.102133	-0.286881	0.0896908	0.0519895
DCD_HUMAN	0.210562	-0.049069	-0.141959	0.315678	-0.128529	-0.106668	-0.0586015	0.133783
DCLK1_HUMAN	-0.262683	0.565985	-0.00685478	-0.0351306	0.216142	0.00685478	-0.369144	-0.312038
DCMC_HUMAN	0.015927	-0.128664	0.00246384	0.119881	-0.30459	-0.0200205	-0.039271	0.187508
DCNL1_HUMAN	0.177186	-0.000113878	-0.0200515	-0.0417499	0.117094	0.0705529	-0.0122457	-0.103773
DCNL2_HUMAN	-0.0463275	-0.0186846	0.004326	-0.000466135	-0.260827	0.208533	-0.00678534	0.208114
DCNL4_HUMAN	NA	NA	NA	NA	NA	NA	NA	NA
DCP1B_HUMAN	NA	NA	NA	NA	NA	NA	NA	NA
DCPS_HUMAN	-0.00129573	-0.0420033	-0.0363249	0.000800623	-0.0601838	0.315728	-0.000800623	0.152759
DCTN1_HUMAN	-0.0284242	0.0287561	-0.0119425	-0.00437733	0.000439259	0.116696	-0.0505493	0.0270457
DCTN2_HUMAN	-0.12877	0.0370738	0.0135087	-0.0766618	-0.011102	0.154193	-0.00905037	0.031809
DCTN3_HUMAN	-0.0731679	0.128972	-0.176208	-0.00332035	0.00628384	0.317187	-0.0210356	-0.0290292
DCTN4_HUMAN	0.0163755	0.0679575	-0.0336834	-0.0479224	-0.0285825	0.174335	-0.023736	0.00668733
DCTN6_HUMAN	0.131431	0.0349546	-0.0715307	0.128532	-0.151591	0.0583629	-0.346054	0.202715
DCTP1_HUMAN	0.0368659	-0.0909891	0.0829459	0.161806	-0.00932157	-0.226801	-0.0243866	-0.00318015
DCUP_HUMAN	0.196991	-0.0134978	0.0233154	-0.313273	0.455179	-0.0582415	-0.0337976	-0.244384
DCXR_HUMAN	0.112006	-0.0561354	0.117244	0.226891	-0.215598	-0.0339525	-0.136003	-0.00109774
DD19A_HUMAN	-0.0469089	-0.0212758	0.0965714	0.0175986	-0.15247	-0.0667763	0.0212758	0.234959
DD19B_HUMAN	0.0767927	-0.107203	0.0990379	0.0205892	-0.111963	0.216148	-0.123015	-0.026732
DDA1_HUMAN	0.141547	-0.019958	0.124593	0.0193758	0.0107574	0.101628	-0.128652	-0.0287108
DDAH1_HUMAN	0.113573	0.058603	-0.27936	0.0281968	-0.133198	0.359505	-0.270984	-0.00612846
DDAH2_HUMAN	0.0883696	-0.00974364	-0.187581	0.203414	0.00974364	0.115123	-0.164121	-0.0582137
DDB1_HUMAN	0.0749118	0.00709178	-0.175267	0.0697114	-0.126942	0.0823657	-0.0287687	0.0525414
DDI2_HUMAN	0.232616	0.08232	-0.129645	-0.152869	0.637244	-0.00990116	0.0290798	-0.306143
DDRGK_HUMAN	0.148813	-0.106902	-0.0105305	0.0583473	0.257964	-0.0495022	0.028915	-0.260636
DDX1_HUMAN	0.00218346	0.00238437	0.0199574	-0.00123544	-0.0881879	0.0907523	-0.02256	0.0015061
DDX17_HUMAN	-0.125877	0.0380352	-0.0902987	0.0319786	0.0189783	0.0644413	-0.0105992	0.0379401
DDX18_HUMAN	0.0208559	0.092368	-0.169516	0.392012	0.0132412	-0.0132412	-0.132851	0.0202108
DDX21_HUMAN	-0.0309207	0.166829	-9.05e-05	-0.030744	0.0798962	0.0118648	-0.245006	0.0341126
DDX23_HUMAN	-0.0782242	0.070352	-0.0362387	0.0881267	0.0305544	0.1011	-0.0272979	-0.0305544
DDX24_HUMAN	-0.0316699	-0.081019	0.0299783	-0.075062	-0.00831577	-0.125123	-0.119093	-0.185633
DDX27_HUMAN	0.0938532	0.1128	-0.0081818	0.0415095	0.1199	0.0366985	-0.0123901	-0.0644515
DDX28_HUMAN	0.00873031	-0.0201986	0.427426	-0.243982	-0.0334127	-0.366898	0.225424	0.0319205
DDX3X_HUMAN	0.137275	0.180764	-0.103124	0.162884	0.0908742	-0.160422	-0.167859	-0.177025
DDX3Y_HUMAN	-0.331047	-0.558698	0.335581	-0.466139	-0.437376	0.447386	0.321386	0.374852
DDX41_HUMAN	-0.146194	0.0604326	-0.0219209	-0.00428385	-0.00374252	0.0782883	0.00926375	0.100948
DDX42_HUMAN	-0.144257	0.0257989	0.0449086	-0.0242548	0.0299876	0.0654722	0.0530622	0.00885143
DDX46_HUMAN	-0.086246	0.0773885	-0.0352779	0.0122944	0.00172995	0.0337601	-0.00303206	0.0301798
DDX47_HUMAN	0.114406	-0.0751047	-0.0587319	-0.303106	-0.148341	0.413219	0.107091	-0.0296048
DDX5_HUMAN	-0.0270008	0.375603	0.071489	0.11161	-0.122973	0.00567255	-0.0391392	0.0465468
DDX50_HUMAN	NA	NA	NA	NA	NA	NA	NA	NA
DDX54_HUMAN	NA	NA	NA	NA	NA	NA	NA	NA
DDX56_HUMAN	-0.05485	0.118021	-0.0557544	-0.010811	0.010811	0.156436	0.0701254	0.0484609
DDX58_HUMAN	-0.0547266	0.0961353	0.11634	0.191408	0.0186132	0.13442	-0.0832725	-0.0546377
DDX6_HUMAN	-0.0523595	-0.00754528	0.00786716	-0.0221235	0.0352161	-0.00259619	-0.0605676	0.0306744
DDX60_HUMAN	NA	NA	NA	NA	NA	NA	NA	NA
DECR_HUMAN	-3.15e-05	-0.254559	0.340025	0.266041	-0.277855	-0.227092	0.108123	-0.0291399
DECR2_HUMAN	0.144196	0.0463356	-0.250744	-0.31754	0.170285	0.208676	-0.0390447	-0.155283
DEF4_HUMAN	NA	NA	NA	NA	NA	NA	NA	NA
DEFM_HUMAN	-0.117725	0.0169825	0.00265191	0.0942228	-0.0526506	0.0152673	0.101391	0.203621
DEK_HUMAN	-0.0701349	-0.00896875	-0.12976	-0.0666973	0.204853	0.110462	-0.055726	0.193235
DEMA_HUMAN	0.468488	0.38565	-0.437603	-0.437891	1.28635	-0.183572	0.126246	-0.515622
DEN1A_HUMAN	NA	NA	NA	NA	NA	NA	NA	NA
DEN4B_HUMAN	0.0729694	0.40061	0.360977	-0.51285	1.19151	-0.141703	0.113207	-0.0921428
DEN4C_HUMAN	-0.31642	0.032608	-0.439117	0.23682	0.158531	-0.44216	0.0319414	0.0794914
DENR_HUMAN	-0.0599506	-0.02385	0.0518222	-0.150535	-0.0387573	0.0653178	-0.00475783	0.0812578
DEOC_HUMAN	-0.00872131	0.107772	-0.079109	-0.03871	0.674834	0.0843078	0.0151382	-0.306475
DERL1_HUMAN	0.411488	0.248066	-0.216826	-0.0332376	0.756856	-0.0712622	0.0877007	-0.0336404
DERL2_HUMAN	NA	NA	NA	NA	NA	NA	NA	NA
DERM_HUMAN	-0.057813	0.31164	0.0152225	0.0815686	0.0734639	-0.0171619	-0.0815686	-0.00316114
DESM_HUMAN	0.015131	0.095176	-0.00148937	-0.115455	-0.0819825	0.144475	-0.0266557	-0.00566853
DESP_HUMAN	-0.130698	0.0699733	0.0567214	0.319575	-0.200597	-0.124839	0.261712	-0.271486
DEST_HUMAN	0.149077	0.230017	-0.264016	-0.00954487	-0.0250811	0.0868751	-0.175928	0.114465
DFFA_HUMAN	0.118966	-0.0287698	0.0247172	0.0876577	-0.0308047	0.0497351	-0.0747767	-0.286906
DGCR6_HUMAN	NA	NA	NA	NA	NA	NA	NA	NA
DGKA_HUMAN	-1.61446	-0.0322054	0.296688	0.0415973	-0.253055	0.415472	0.0582995	-0.539033
DGKQ_HUMAN	NA	NA	NA	NA	NA	NA	NA	NA
DGKZ_HUMAN	0.105785	0.0803109	0.0494299	-0.0236599	0.0370421	0.0361702	-0.00746353	-0.0630725
DGUOK_HUMAN	0.0563381	-0.0945269	-0.301055	-0.0197804	0.363118	-0.164059	0.0386911	-0.177904
DHB11_HUMAN	-0.00180045	0.136967	0.0212004	0.00180045	0.318124	-0.0212004	-0.125288	0.0217356
DHB12_HUMAN	0.0798056	0.226046	0.0198873	0.199133	-0.000677206	-0.0488307	-0.128461	-0.112749
DHB4_HUMAN	-0.0407237	0.001068	0.0394087	0.00674951	-0.0450648	-0.113282	-0.0150421	0.0644599
DHB8_HUMAN	-0.194881	0.00614331	0.136224	-0.00724967	-0.257836	-0.0464902	0.180782	0.0839112
DHC24_HUMAN	0.302962	0.129467	0.220717	0.183626	-0.230333	-0.0797259	-0.228382	-0.211555
DHE3_HUMAN	0.0263237	-0.0738541	0.204484	0.270685	-0.226804	-0.131038	-0.00403293	-0.132113
DHPR_HUMAN	0.019201	-0.0740487	-0.0247521	0.0550334	-0.222689	0.121242	-0.0565735	0.0260008
DHR11_HUMAN	-0.0532957	0.00864423	-0.0211801	-0.0238278	0.0637289	0.100828	-0.0281416	0.115497
DHRS1_HUMAN	-0.200677	0.268723	0.0818334	-0.0172683	-0.175324	0.263887	0.0891911	-0.0561011
DHRS4_HUMAN	0.285731	0.0910079	0.359826	-0.204768	-0.13362	-0.48276	0.100415	-0.0545049
DHRS7_HUMAN	-0.120885	0.118627	0.00955669	-0.0473974	-0.0244355	0.297275	0.00402755	0.000200648
DHSO_HUMAN	0.0156417	-0.0590482	0.0916135	0.114291	0.0457536	-0.0809605	-0.0689649	-0.118872
DHTK1_HUMAN	-0.0977515	-0.137081	0.0770515	0.346468	-0.206543	-0.101178	0.00849456	0.12277
DHX15_HUMAN	0.0109943	0.0619634	-0.0464252	0.0309583	-0.0106969	0.067281	-0.0175891	0.0824367
DHX16_HUMAN	-0.274911	0.114941	-0.0028688	0.0693815	0.0977523	0.0462165	-0.141368	0.151236
DHX29_HUMAN	0.0395295	-0.0175819	0.132611	0.151482	-0.291736	0.010116	-0.226712	0.0157269
DHX30_HUMAN	0.0280027	0.00784182	0.169068	0.10929	-0.119245	-0.109888	-0.0143789	-0.0225449
DHX36_HUMAN	0.0351697	-0.0428984	0.0475144	0.110986	-0.0539449	0.0267939	-0.165219	-0.00685374
DHX9_HUMAN	-0.0419032	0.0593845	-0.145481	0.0436563	-0.00129407	0.114338	-0.0102515	0.053881
DHYS_HUMAN	0.0295728	0.00342347	0.0461625	-0.0910691	-0.176172	0.147389	0.0173272	0.103954
DIA1_HUMAN	NA	NA	NA	NA	NA	NA	NA	NA
DIAP1_HUMAN	0.0213194	0.0602278	-0.0200072	-0.0816274	0.180168	0.0561865	-0.12867	-0.0652275
DIAP2_HUMAN	0.0208308	0.0821949	-0.0911045	0.0702738	0.0742427	-0.0193234	-0.102485	0.0524258
DIC_HUMAN	0.0267304	0.048119	-0.0124986	0.140386	-0.0409881	-0.203738	0.0657452	0.0175063
DIDO1_HUMAN	NA	NA	NA	NA	NA	NA	NA	NA
DIP2A_HUMAN	0.00135653	-0.0360117	0.17524	-0.0237737	0.161333	0.142816	-0.00135653	-0.13081
DIP2B_HUMAN	-0.365185	0.138055	0.247088	-0.26832	-0.0253214	-0.373859	0.00655842	0.0296335
DIP2C_HUMAN	0.111928	-0.0913348	-0.117537	0.181003	-0.0336173	-0.0424139	-0.00157905	0.00347856
DJB11_HUMAN	-0.21843	0.00534623	0.0313989	-0.134689	0.0636797	-0.0481187	0.0939327	0.0387513
DJB12_HUMAN	NA	NA	NA	NA	NA	NA	NA	NA
DJC10_HUMAN	0.0874581	0.00495138	0.0413996	0.545898	0.102616	-0.609195	-0.327293	-0.0160198
DJC11_HUMAN	-0.0208627	-0.119801	0.00896225	0.226705	-0.155248	0.0282053	-0.0125672	0.0395176
DJC13_HUMAN	-0.0877185	0.0290463	-0.0433545	0.111846	0.0405499	-0.0652445	0.0199063	-0.00336406
DJC21_HUMAN	0.078733	-0.00079449	-0.00782071	0.191119	-0.0413673	-0.062187	-0.184821	-0.0520836
DJC30_HUMAN	-0.012571	-0.0535869	0.10906	0.16516	-0.0731576	-0.205247	0.281568	0.0329168
DKC1_HUMAN	-0.0890395	-0.0137516	-0.179471	-0.0608119	0.0312278	0.205647	0.0931533	-0.00378089
DLDH_HUMAN	-0.00869056	-0.194664	0.114111	0.17501	-0.185343	-0.192854	0.0304365	0.0297067
DLG1_HUMAN	0.0272476	0.050011	9.26e-05	-0.050011	0.221072	0.110671	-9.26e-05	-0.0118552
DLGP4_HUMAN	0.00248312	0.0923343	-0.00248312	-0.188025	-0.519982	0.0918055	-0.0232474	0.0511334
DLRB1_HUMAN	-0.120286	-0.117661	-0.0186517	-0.0431623	-0.0880691	0.212946	-0.0316397	0.0431623
DMAC1_HUMAN	-0.0751971	-0.0359288	0.289828	0.204876	-0.0213891	0.0173367	-0.0619208	-0.0173367
DMAC2_HUMAN	-0.0608442	-0.149963	0.0176373	-0.0727442	0.47138	-0.389149	-0.046774	0.108663
DMD_HUMAN	-0.0156825	-0.00033247	-0.0247588	-0.0340977	-0.0214079	0.163818	0.0492906	0.0327617
DMPK_HUMAN	NA	NA	NA	NA	NA	NA	NA	NA
DMXL1_HUMAN	NA	NA	NA	NA	NA	NA	NA	NA
DNJA1_HUMAN	0.00549828	0.0270826	-0.0247811	0.0339461	0.0474803	0.0546136	-0.0108092	-0.139842
DNJA2_HUMAN	0.0105754	-0.0640122	-0.00912442	-0.0862306	-0.0908522	0.0487556	-0.0251972	0.0225936
DNJA3_HUMAN	-0.0172174	-0.152624	0.168503	0.0643525	-0.1589	-0.101048	-0.00805497	0.00300597
DNJA4_HUMAN	0.0707691	0.0291905	0.0285288	-0.0322068	-0.15506	0.0236479	-0.0871328	-0.00898794
DNJB1_HUMAN	-0.0372526	0.172668	-0.21083	0.0416829	0.470319	0.0189057	0.0756698	-0.0841723
DNJB2_HUMAN	-0.0541303	-8.07e-05	0.0305741	-0.0333506	0.375163	-0.0436099	0.000136756	-0.0168549
DNJB4_HUMAN	-0.0061405	-0.0804751	-0.0580733	-0.0144728	-0.0196057	0.156084	-0.0245896	0.0243799
DNJB5_HUMAN	0.0529158	0.0529697	-0.0257514	-0.0196857	-0.0690332	0.145033	-0.0423473	-0.044161
DNJB6_HUMAN	-0.0857503	-0.116041	0.0762897	-0.0318053	-0.176964	0.0239373	-0.0312818	0.0347909
DNJC1_HUMAN	NA	NA	NA	NA	NA	NA	NA	NA
DNJC2_HUMAN	-0.0969631	-0.0132707	0.265152	0.23098	-0.0648847	-0.0671729	0.0237418	-0.0436584
DNJC3_HUMAN	-0.0792804	-0.0984522	0.190583	-0.0429841	-0.0115778	0.0788146	0.180738	0.119972
DNJC5_HUMAN	0.004939	0.193365	0.0277899	0.013341	0.103205	0.143175	-0.0870172	0.176308
DNJC7_HUMAN	-0.0030764	0.0809164	0.252235	-0.0803572	-0.200602	0.0397352	-0.113019	0.0183914
DNJC8_HUMAN	-0.068919	0.0190809	-0.129899	-0.02269	0.0127508	0.098167	-0.0486054	0.328389
DNJC9_HUMAN	-0.056519	0.15005	-0.11613	-0.0465663	0.317598	-0.00824477	-0.053904	0.255269
DNLI3_HUMAN	0.0695608	0.138682	0.000444517	0.0124355	-0.0485408	0.0907767	0.0340261	-0.0873276
DNM1L_HUMAN	-0.0241405	-0.0642578	0.0946874	-0.00770491	-0.0338147	-0.0466278	0.02693	0.015577
DNM3A_HUMAN	NA	NA	NA	NA	NA	NA	NA	NA
DNMBP_HUMAN	-0.0261511	-0.00716954	0.0684263	0.0185023	0.0153743	0.0190819	-0.0445636	-0.0424684
DNPEP_HUMAN	-0.0192945	-0.0195107	0.00450965	-0.0262864	0.0323287	-0.0105341	-0.0216744	-0.0372282
DNPH1_HUMAN	0.0112022	-0.215348	0.246156	-0.0656233	-0.0177351	0.04567	-0.0216476	-0.00129563
DNS2A_HUMAN	0.0286895	-0.138507	0.0514307	0.0626032	-0.706404	0.500379	-0.162055	0.104384
DNSL1_HUMAN	0.0867042	0.256406	-0.180245	-0.0983913	0.250485	0.163406	-0.253732	-0.0626236
DOC11_HUMAN	0.000746904	0.135482	0.135143	-0.135094	-0.0296051	0.00642142	-0.000746904	0.0460753
DOCK4_HUMAN	0.0538277	0.0802371	0.0201265	0.209572	-0.0484193	-0.0201265	-0.0775574	0.325752
DOCK6_HUMAN	NA	NA	NA	NA	NA	NA	NA	NA
DOCK9_HUMAN	-0.231732	0.0907392	0.271334	0.253729	-0.0305031	-0.00607483	-0.27782	-0.106923
DOHH_HUMAN	-0.00508021	-0.157764	-0.0149905	-0.0400407	0.018414	0.121943	-0.00793031	0.263487
DOK2_HUMAN	NA	NA	NA	NA	NA	NA	NA	NA
DOK3_HUMAN	0.253675	-0.074805	0.140835	-0.0824855	0.0942535	-0.253949	0.279353	0.0746632
DOK7_HUMAN	-0.0718634	0.0244652	0.119825	-0.295418	0.0128854	-0.0688766	0.106137	0.0534603
DOPD_HUMAN	0.274395	-0.377411	-0.0268089	-0.0188136	-0.109692	-0.376423	-0.19074	0.411829
DP13A_HUMAN	0.0430543	-0.0208991	-0.0136148	0.0561667	-0.144232	0.123414	0.00413322	0.00172566
DP13B_HUMAN	-0.0540416	0.185027	0.0848134	-0.028583	0.314859	0.028583	-0.0686194	0.0391935
DPA1_HUMAN	-0.326014	-0.0424427	0.0030944	0.0571978	-0.158991	-0.183878	-0.0311237	0.355806
DPB1_HUMAN	NA	NA	NA	NA	NA	NA	NA	NA
DPH1_HUMAN	0.246516	-0.179848	0.162811	0.0949252	-0.519739	-0.117528	0.113914	-0.331886
DPH2_HUMAN	-0.0115261	0.0213229	-0.226488	0.00854964	-0.167347	-0.102935	0.096374	-0.0637342
DPH5_HUMAN	0.00277475	0.0952436	-0.00277475	0.00697268	-0.268428	-0.221254	0.197224	0.0435121
DPH6_HUMAN	0.0995431	-0.0472386	0.127865	-0.21009	-0.223645	0.309111	-0.175951	0.0534217
DPOE1_HUMAN	NA	NA	NA	NA	NA	NA	NA	NA
DPOE4_HUMAN	-0.0397996	0.304995	0.302314	-0.104387	0.185381	-0.085078	0.0397996	-0.440079
DPOG1_HUMAN	-0.314892	0.0284393	0.257838	0.175364	-0.11166	-0.111791	-0.212074	0.106172
DPOG2_HUMAN	NA	NA	NA	NA	NA	NA	NA	NA
DPOLB_HUMAN	-0.0697297	0.165804	0.0477964	-0.0352364	-0.00807283	0.105835	-0.0103076	0.0140365
DPOLM_HUMAN	0.0687197	0.124081	-0.0707526	-0.130097	0.420263	-0.0640975	0.0640975	-0.15771
DPP2_HUMAN	0.0118651	-0.0481598	0.0404088	-0.0830452	-0.0118682	-0.0261407	0.110566	0.0111641
DPP3_HUMAN	0.134396	0.0618905	0.0846875	-0.0765869	0.0133581	-0.0224966	-0.065164	-0.0256939
DPP4_HUMAN	0.228268	0.441506	-0.102439	-0.385224	0.598627	-0.0919222	0.0766452	-0.263685
DPP8_HUMAN	-0.105175	0.251549	1.20255	-0.011935	-0.365065	-0.193909	0.011935	0.378545
DPP9_HUMAN	0.0404207	-0.0357964	0.038258	0.151086	-0.157181	-0.0392066	0.0154436	-0.0154436
DPTOR_HUMAN	-0.039515	-0.133966	0.0522826	-0.0575002	-0.0162841	0.13669	0.0338159	-0.0111365
DPYD_HUMAN	NA	NA	NA	NA	NA	NA	NA	NA
DPYL2_HUMAN	-0.0509238	-0.0210858	0.0248522	0.259664	-0.0566545	0.0594704	-0.0376212	-0.00368985
DPYL3_HUMAN	0.0326386	0.148535	-0.0478805	-0.0240296	-0.0307747	0.0180163	-0.175061	-0.0272073
DPYL4_HUMAN	0.123716	0.0661916	-0.280196	0.136697	-0.087916	-0.0661916	-0.122028	0.124131
DQA2_HUMAN	NA	NA	NA	NA	NA	NA	NA	NA
DRA_HUMAN	-0.133444	0.00166116	-0.0380257	0.211645	0.165869	-0.0986947	0.0140311	0.00111734
DREB_HUMAN	0.0372182	0.0581575	0.0494563	0.0567191	0.141579	-0.00545883	-0.0826568	-0.0356476
DRG1_HUMAN	-0.00880361	0.0213814	-0.0595208	-0.017751	-0.0835251	0.0255208	0.0305284	0.0170287
DRG2_HUMAN	-0.0473041	-0.0735513	-0.0385783	0.208212	-0.0121076	0.0275811	-0.127415	0.033423
DRS7B_HUMAN	0.0748572	-0.127777	0.0125541	-0.0866986	-0.0204432	0.00339011	0.0145442	0.174094
DRS7C_HUMAN	0.105684	-0.0257262	0.0278293	-0.0248449	-0.116476	-0.0398058	0.056131	-0.00794502
DS13A_HUMAN	-0.362567	0.202268	-0.0195721	-0.00510865	-0.173693	-0.0518067	-0.0125259	-0.0135477
DS13B_HUMAN	-0.0919233	0.0506878	-0.0378256	0.17706	0.115536	0.0610422	0.149285	-0.0326858
DSCR3_HUMAN	-0.0532526	-0.0901546	0.149054	0.153832	0.199253	0.0577437	-0.0587736	-0.0516703
DSG1_HUMAN	-0.175714	0.0792798	-0.162661	0.0685292	0.218022	0.0657571	-0.0212812	0.0267403
DSRAD_HUMAN	-0.676763	0.416907	-0.0173621	0.0937634	-0.243808	0.000851852	-0.0657557	-0.0677832
DTBP1_HUMAN	0.0810163	0.0420557	-0.259333	0.0944199	-0.114042	-0.00307242	0.0590076	-0.0190144
DTD1_HUMAN	0.0521311	0.0144522	0.0988161	0.260755	-0.093033	0.00445838	-0.125219	-0.102948
DTNA_HUMAN	0.0857317	-0.0380762	-0.0159044	0.00731813	-0.077403	0.0764864	-0.0125443	-0.0565736
DTWD2_HUMAN	0.722164	-0.308768	0.0955596	-0.823904	0.225471	-0.0955596	0.352451	0.462694
DTX3L_HUMAN	-0.279268	0.300519	0.375179	-0.202681	-0.222218	0.167698	0.037234	0.00976486
DUPD1_HUMAN	-0.302369	-0.222831	-0.00211107	0.0673405	-0.165398	0.248849	0.0479841	0.239197
DUS12_HUMAN	-0.0281876	-0.0669667	-0.374766	0.0961654	-1.27441	0.0953653	0.0281876	0.439055
DUS1L_HUMAN	-0.0047836	-0.0424201	-0.11102	0.0272569	-0.161804	0.169716	-0.0720463	-0.0203483
DUS23_HUMAN	0.281682	0.109048	0.391687	0.0402819	0.0103622	-0.151522	-0.054767	-0.168836
DUS26_HUMAN	0.0252587	-0.0385423	0.0282018	0.0997089	-0.315118	-0.16059	0.0781093	-0.0722714
DUS27_HUMAN	-0.010885	0.00689508	0.0417254	-0.0598154	-0.0440287	0.109753	-0.0320291	-0.0127169
DUS28_HUMAN	-0.0535051	0.0286376	-0.0168899	-0.0324555	-0.0146316	0.263506	-0.0329846	-0.0511565
DUS2L_HUMAN	-0.415201	0.18389	0.205081	0.236866	-0.0438922	-0.13114	-0.0319793	0.0319793
DUS3_HUMAN	0.00316318	-0.189451	0.0208353	0.00639034	-0.132079	0.0452503	-0.0232848	-0.0118908
DUT_HUMAN	-0.221829	0.00945627	0.105666	0.00538819	-0.076564	-0.00887033	0.00887033	0.0879213
DVL1_HUMAN	-0.471689	0.048402	0.0262218	0.312308	-0.13007	-0.341778	0.208099	0.19358
DVL2_HUMAN	0.0120628	0.239785	0.138633	-0.0240373	0.291646	-0.0323604	-0.0120628	-0.0676216
DX39B_HUMAN	-0.0432244	-0.0134664	-0.0661333	-0.0287045	-0.0733282	0.0311699	0.0339066	0.0330245
DYH11_HUMAN	NA	NA	NA	NA	NA	NA	NA	NA
DYH7_HUMAN	NA	NA	NA	NA	NA	NA	NA	NA
DYHC1_HUMAN	-0.0162996	0.00201348	-0.0140914	0.0333001	-0.0324411	0.116602	-0.0100046	0.0122733
DYL1_HUMAN	-0.0492822	0.134709	-0.167238	0.23019	0.0156921	-0.0640507	-0.0156921	0.0486034
DYL2_HUMAN	-0.0682165	0.0426793	0.0299627	-0.137342	0.0545144	-0.0321433	-0.10999	0.0919755
DYLT1_HUMAN	-0.0742658	-0.0182338	-0.0165767	-0.0393432	-0.133552	0.355024	0.074862	-0.0104318
DYLT3_HUMAN	-0.0805658	0.0593227	-0.266097	0.0725665	-0.0289611	0.088464	-0.0244008	0.32497
DYN1_HUMAN	NA	NA	NA	NA	NA	NA	NA	NA
DYN2_HUMAN	-0.00178604	-0.00947543	0.0230411	-0.0392181	0.0077752	-0.0566032	-0.0196659	0.0630883
DYN3_HUMAN	-0.0288561	-0.108844	-0.259352	0.0620487	-0.260165	0.116756	-0.00924706	-0.0284202
DYR1A_HUMAN	0.081692	-0.0805337	-0.000168046	0.073478	-0.0146036	-0.0126382	0.0659718	0.0365624
DYSF_HUMAN	0.00124042	-0.0641862	-0.114562	-0.0180503	0.0104351	0.249142	0.0256766	0.0242191
DYST_HUMAN	-0.0590678	0.00535922	0.0479585	0.0451656	-0.147415	-0.00558962	-0.0654144	0.014835
E2AK2_HUMAN	-0.00428398	-0.0315144	0.0231546	0.215638	0.0295947	-0.00196084	-0.142698	-0.0231546
E2AK4_HUMAN	NA	NA	NA	NA	NA	NA	NA	NA
E41L1_HUMAN	NA	NA	NA	NA	NA	NA	NA	NA
E41L2_HUMAN	-0.0161641	0.268338	-0.00560667	0.17235	0.105711	0.000904583	-0.106372	-0.0949811
E41L3_HUMAN	-0.208176	0.217148	-0.30394	-0.0583578	-0.205264	0.186465	0.191434	0.0598159
EAA1_HUMAN	0.149507	-0.0845559	-0.111108	0.162745	-0.11602	-0.557521	-0.0149742	0.0419724
EBP2_HUMAN	0.142656	0.194417	0.0111219	0.0200743	0.518851	-0.225451	-0.0111219	-0.39988
ECD_HUMAN	NA	NA	NA	NA	NA	NA	NA	NA
ECE1_HUMAN	NA	NA	NA	NA	NA	NA	NA	NA
ECH1_HUMAN	-0.0129514	-0.164812	0.0183967	0.16059	-0.142625	-0.125205	-0.0141764	0.121631
ECHA_HUMAN	0.00010953	-0.121798	0.0188711	0.122874	-0.112634	-0.188507	-0.0104578	0.185036
ECHB_HUMAN	-0.00587649	-0.124175	0.0121354	0.106537	-0.173458	-0.167031	-0.0253857	0.163575
ECHD1_HUMAN	0.0221522	-0.196394	0.273516	0.0378935	-0.241656	-0.131164	-0.0205835	-0.00188382
ECHD2_HUMAN	-0.0496553	-0.120491	0.102597	0.0323141	-0.129398	-0.0413335	-0.0884838	0.154009
ECHD3_HUMAN	-0.209921	-0.0513676	0.0540179	0.164029	-0.0866199	-0.278794	-0.000197205	0.242521
ECHM_HUMAN	0.00603084	-0.195528	0.0727507	0.0835574	-0.282207	-0.0848208	0.0204368	0.115754
ECHP_HUMAN	-0.00700814	-0.100706	0.299976	0.0263392	-0.300648	-0.236662	0.0593916	-0.0587842
ECI1_HUMAN	-0.0122752	-0.304027	0.231207	0.0597243	-0.289816	-0.269611	0.150176	0.021012
ECI2_HUMAN	-0.00106996	-0.237382	0.154929	0.10894	-0.231067	-0.166801	0.0284242	0.0454549
ECM1_HUMAN	0.213989	-0.00153381	-0.137147	-0.0444501	0.412436	-0.241537	0.0635011	-0.215836
ECM29_HUMAN	0.00777292	0.0303902	-0.0559751	-0.00254953	-0.101498	0.108262	-0.0335422	0.00266002
ECP_HUMAN	-0.0275356	0.0179055	0.0732852	0.199642	0.58561	-0.0179055	0.200912	-0.177451
ECSIT_HUMAN	0.269923	-0.17273	0.157143	0.201126	-0.45659	0.0655285	-0.237176	-0.0345137
EDC3_HUMAN	0.125928	0.0284217	0.0589345	0.068189	-0.0794678	0.114819	-0.114344	0.129739
EDC4_HUMAN	0.002197	0.00445192	-0.00324822	-0.0341685	0.00324822	0.1037	-0.159246	0.279083
EDF1_HUMAN	0.0440733	-0.0316475	-0.0814658	0.0457085	-0.134302	0.174062	-0.122493	0.0746847
EEA1_HUMAN	-0.0198049	0.010654	0.143268	-0.0191029	-0.0614071	0.0406699	0.0367711	-0.0279438
EEPD1_HUMAN	0.0606258	0.137378	-0.0123538	-0.0315197	0.170711	0.0289469	-0.0358287	-0.0846964
EF1A1_HUMAN	0.0190048	0.409145	-0.0190048	-0.334353	1.1849	0.165674	0.329335	-0.231461
EF1A2_HUMAN	0.0110932	-0.128541	0.0637758	0.0192972	-0.197668	0.103615	-0.0572728	0.0490323
EF1B_HUMAN	-0.15725	-0.0375914	0.108218	0.0303916	-0.194337	0.153494	-0.0171747	-0.0142568
EF1D_HUMAN	0.00576858	-0.0398416	0.0750768	0.0606279	-0.0358362	0.0347814	-0.0345881	-0.00196865
EF1G_HUMAN	-0.00626432	-0.0119966	0.08604	0.0754836	-0.120486	-0.0186362	0.00280738	-0.0210717
EF2_HUMAN	0.0527284	-0.0228955	0.0322056	0.045172	-0.177002	0.0566012	-0.0569867	0.0208873
EF2K_HUMAN	0.109161	-0.0535959	-0.0942135	0.0733238	-0.14214	0.0661523	-0.0962854	-0.0830054
EFGM_HUMAN	0.0370689	-0.134	0.24436	0.033638	-0.248505	-0.0557196	0.0795937	-0.0399855
EFHD1_HUMAN	-0.0930379	0.214117	0.200988	0.0742155	-0.392959	1.696	-0.0855931	-0.152737
EFHD2_HUMAN	0.0407405	0.0627911	0.0340203	-0.0537634	0.469846	-0.102888	-0.143428	-0.11005
EFL1_HUMAN	-0.129058	0.051355	0.0302783	0.0690459	-0.0455826	-0.0302783	-0.0750181	-0.171486
EFMT2_HUMAN	NA	NA	NA	NA	NA	NA	NA	NA
EFNB2_HUMAN	-0.189324	-0.0420524	0.0727356	-0.054754	0.030215	-0.105879	-0.0317413	0.298105
EFR3A_HUMAN	-0.119272	0.0411818	-0.161485	-0.0361193	0.315012	0.178401	0.0521656	-0.0111715
EFR3B_HUMAN	0.170749	-0.141165	0.24352	0.0922612	-0.230472	-0.233753	-0.0550694	-0.253395
EFTS_HUMAN	-0.165424	-0.309135	0.189667	0.0971741	-0.162421	-0.351065	0.0288069	0.0502244
EFTU_HUMAN	-0.0134205	-0.189987	0.151173	0.173757	-0.27336	-0.225231	0.0410005	0.0248182
EGFLA_HUMAN	-0.0410646	-0.0628093	0.165815	0.222056	-0.066988	0.0222519	0.0224054	-0.012789
EGFR_HUMAN	-0.0195092	0.0889037	0.125806	0.120754	0.0914498	-0.0698758	-0.0836484	-0.112011
EGLN_HUMAN	-0.139836	0.0449569	0.363854	-0.00454258	0.0653639	-0.532653	-0.0114197	-0.382974
EGLN1_HUMAN	-0.0396844	0.0031939	0.0770555	-0.0031939	-0.307893	-0.0116335	-0.0144021	0.472157
EH1L1_HUMAN	-0.0384975	-0.0412234	0.0711926	-0.0196883	-0.0706477	0.0446391	0.00215983	0.0127286
EHD1_HUMAN	-0.021122	-0.00625692	0.0581873	0.0105791	0.00147491	-0.000433557	0.00469668	-0.0744789
EHD2_HUMAN	-0.0657699	0.0832941	0.0469466	0.146743	-0.0381873	-0.0640122	-0.0748521	-0.00234113
EHD3_HUMAN	NA	NA	NA	NA	NA	NA	NA	NA
EHD4_HUMAN	-0.0417533	0.0149285	0.155494	0.201698	0.0260727	-0.0454346	-0.151575	-0.073728
EI24_HUMAN	-0.0243791	0.0223288	-0.0564579	0.0818577	0.122688	0.193258	-0.064237	-0.0729554
EI2BA_HUMAN	-0.0592778	-0.00793169	0.00464047	0.214295	-0.0437802	0.0093026	-0.0785508	0.0285909
EI2BB_HUMAN	-0.0234456	-0.0468786	0.0286743	0.0162406	-0.230119	0.0616646	-0.0272023	0.329806
EI2BD_HUMAN	0.000515758	0.0285212	-0.0730552	0.113	-0.0281828	0.00203322	0.040508	0.0536195
EI2BE_HUMAN	-0.000163361	0.131036	0.0354782	0.367438	-0.0322499	-0.0504239	-0.03469	0.0630211
EI2BG_HUMAN	-0.0372207	0.044885	0.0140821	0.00323823	-0.18384	0.00220944	0.01911	0.000580534
EIF1_HUMAN	-0.0022665	-0.0652781	0.0360333	0.00159436	-0.335858	-0.0347207	0.103178	0.030821
EIF1A_HUMAN	0.0402609	0.0330956	-0.122445	0.0301265	-0.0950949	-0.00990288	-0.0288538	0.210102
EIF1B_HUMAN	0.182704	-0.0883298	0.082236	0.161654	-0.0781379	-0.18514	-0.118433	0.0951191
EIF2A_HUMAN	-0.0384637	-0.0841058	0.118434	0.0393739	-0.32721	0.141915	-0.0230922	0.02854
EIF2D_HUMAN	0.0328401	0.0782168	0.216251	-0.097675	0.0199872	-0.0240566	-0.0685769	0.0417456
EIF3A_HUMAN	-0.00551255	0.0138023	0.0489479	-0.0205846	-0.11945	0.0429713	-0.0184699	0.0721183
EIF3B_HUMAN	-0.0200995	-0.0194809	0.00922614	0.0307117	-0.117396	0.0455175	0.00698631	0.0562235
EIF3C_HUMAN	-0.0459691	0.0148455	0.0370711	0.066616	-0.0568988	0.0305125	-0.00237809	0.0415533
EIF3D_HUMAN	-0.0440337	-0.000365801	-0.0274712	0.0832447	-0.0434319	0.0716714	-0.0125568	0.0496372
EIF3E_HUMAN	-0.0783662	-0.0145394	0.0195904	0.000369686	-0.00385169	0.0774511	0.00175402	0.0226187
EIF3F_HUMAN	0.000326767	0.0104575	0.0128907	-0.00129123	-0.00883571	0.0803789	0.0128059	-0.0309847
EIF3G_HUMAN	-0.0622955	-0.0276435	0.119457	-0.035794	-0.299553	0.118931	0.0252363	0.0658826
EIF3H_HUMAN	-0.0637068	0.0311022	0.0500038	-0.0497419	-0.0663561	0.109502	-0.0515873	-0.0393328
EIF3I_HUMAN	0.00395634	-0.00687467	0.00999525	-0.0166226	-0.140345	0.0576175	-0.0255479	0.0273388
EIF3J_HUMAN	-0.0791736	0.000395235	0.020556	0.021906	-0.0644155	0.00317566	0.0172923	-0.0389527
EIF3K_HUMAN	0.0147519	-0.0268305	-0.0176012	0.0504207	-0.25753	0.0394749	-0.195478	0.168439
EIF3L_HUMAN	-0.020128	0.00677048	-0.0563597	0.0530251	-0.137267	0.141567	-0.0289851	0.107421
EIF3M_HUMAN	0.00348817	0.0758825	-0.142949	0.296131	-0.0704124	-0.00939069	-0.0746639	0.0120915
EIPR1_HUMAN	-0.16502	-0.0540119	0.0976443	-0.132495	-0.185429	0.157589	0.00898968	0.111856
ELAV1_HUMAN	-0.0389376	0.026586	-0.0103192	-0.00198147	-0.0189728	0.163044	-0.113673	0.00168399
ELMD2_HUMAN	-0.00560242	0.0057126	0.049883	-0.0168207	-0.10346	0.225462	0.00761693	-0.0261201
ELMO1_HUMAN	-0.00020463	0.00748706	-0.313167	0.00229127	0.256634	-0.0119698	0.00020463	0.0797432
ELMO2_HUMAN	-0.0427192	-0.0982457	0.090569	0.286476	-0.209608	0.0225509	-0.0743114	-0.00320204
ELN_HUMAN	-0.768392	0.269388	0.0530354	0.0909554	1.01923	-0.0909554	0.0640372	-0.0530354
ELNE_HUMAN	0.214569	0.0971517	-0.0790112	0.0107984	0.411114	-0.414641	-0.359452	0.0320898
ELOA1_HUMAN	0.0118335	-0.0118335	-0.459037	0.109663	-0.116979	0.136665	-0.106858	-0.263211
ELOB_HUMAN	-0.00940065	-0.132118	0.0760462	-0.0700945	-0.255355	0.0744935	0.0400238	-0.00269002
ELOC_HUMAN	-0.0755647	-0.0669012	0.0518265	0.0550616	-0.169279	-0.0159788	-0.0572523	0.120969
ELP1_HUMAN	0.0463175	0.0222206	0.0593502	0.00580514	-0.0925665	0.151929	-0.145559	0.133239
ELP2_HUMAN	0.0353596	-0.131195	-0.235923	-0.55658	-0.015859	0.0427067	0.0683018	0.0660352
ELP3_HUMAN	-0.00130521	-0.216362	0.304461	-0.058904	0.00130521	0.0864465	-0.056411	0.225531
ELYS_HUMAN	-0.0668947	0.0238876	0.00229674	0.00134171	0.0149482	0.0134134	-0.0332325	0.0642015
EM55_HUMAN	0.2799	0.0882581	-0.114218	-0.267778	1.11849	-0.0181747	0.0123766	-0.333505
EMAL1_HUMAN	0.0406074	-0.141008	-0.0644671	0.0473395	0.0484176	0.0755684	-0.0787335	-0.139414
EMAL2_HUMAN	0.0679296	0.0828811	-0.00459586	-0.122437	-0.253383	0.300238	-0.243652	0.131794
EMAL3_HUMAN	NA	NA	NA	NA	NA	NA	NA	NA
EMAL4_HUMAN	-0.0923313	0.235489	0.165885	-0.00266021	0.0961571	-0.0833458	0.116372	-0.265386
EMC1_HUMAN	-0.0488959	-0.0195533	-0.00467106	0.0349798	-0.0716616	0.0123407	-0.0117859	-0.0139829
EMC10_HUMAN	-0.0180616	0.00833594	0.0728595	0.0191788	-0.178072	-0.0529805	-0.0566411	0.0343321
EMC2_HUMAN	-0.0328751	0.00705656	-0.0729058	0.132604	-0.113283	0.0924428	0.131894	-0.00705656
EMC3_HUMAN	-0.0808132	0.0146889	0.0696856	-0.132764	-0.0673057	0.0504015	-0.0789871	0.0396364
EMC4_HUMAN	-0.0135882	-0.0401008	0.0565343	0.0555934	0.0651231	0.0411513	0.00297958	-0.279425
EMC7_HUMAN	0.000145532	-0.00193121	0.104899	0.0447751	-0.113622	0.0640867	-0.0516324	-0.0117918
EMC8_HUMAN	-0.0519858	0.00679564	0.123288	-0.0301299	-0.0856159	-0.0106208	-0.0732657	0.0846044
EMC9_HUMAN	0.0272	-0.0933356	0.00169655	0.0102003	0.0385297	-0.0718329	-0.0264074	-0.00166751
EMD_HUMAN	-0.340594	0.0787302	-0.0838196	0.0261486	-0.0949497	0.100489	-0.00106143	0.153432
EMIL1_HUMAN	0.0225656	0.408856	-0.0783139	0.167214	0.287841	-0.00737101	-0.0834837	-0.152785
EMIL2_HUMAN	0.0385391	0.365623	0.131435	0.371888	0.477552	-0.0548212	-0.33715	-0.0554558
EMRE_HUMAN	-0.535176	-0.187871	0.208325	-0.0580545	-0.109759	-0.0552883	0.210691	0.647613
ENAH_HUMAN	0.00725956	0.248689	0.238553	-0.0199965	-0.00725956	0.226515	-0.0455458	0.428941
ENDD1_HUMAN	-0.0215611	0.0920255	-0.00465944	-0.0355805	0.053077	0.0397156	-0.0606519	0.0281479
ENOA_HUMAN	0.0150984	-0.0746713	0.0471472	-0.00304493	-0.0965638	0.0576845	-0.00459617	-0.0122025
ENOB_HUMAN	0.075387	-0.120605	0.0838351	0.0851638	-0.248308	0.00567487	-0.0650584	-0.0163822
ENOF1_HUMAN	0.0918781	-0.0867286	-0.116697	0.000814136	0.352859	0.159638	-0.253611	-0.464208
ENOG_HUMAN	0.110166	0.0111306	-0.0222769	-0.00428389	0.172711	0.00496615	-0.0365326	-0.0202599
ENOPH_HUMAN	0.00372204	-0.00568336	-0.0411799	0.100147	-0.0815155	0.116028	-0.147359	0.0564837
ENPL_HUMAN	-0.0153897	0.0251668	0.0385057	-0.0351932	0.0855632	0.042993	0.0190523	-0.0570149
ENPP1_HUMAN	-0.230264	-0.0703055	0.128977	0.240747	-0.268222	0.0703055	0.375168	-0.116007
ENSA_HUMAN	NA	NA	NA	NA	NA	NA	NA	NA
ENTP1_HUMAN	-0.177697	0.256933	-0.0770752	0.0559403	0.259234	-0.0655126	-0.202985	-0.0402228
ENTP2_HUMAN	-0.182917	-0.22988	0.00412635	0.111082	0.199477	-0.00412635	0.240659	-0.0501717
ENTP3_HUMAN	NA	NA	NA	NA	NA	NA	NA	NA
ENTP5_HUMAN	-0.0626111	0.0781058	-0.0134257	0.231543	0.00808816	0.00204046	-0.191485	-0.0349468
EOGT_HUMAN	0.0277006	0.146461	-0.310975	0.145783	-0.0726841	0.189766	-0.154565	0.158255
EP15R_HUMAN	0.011565	0.00770472	0.0300304	-0.00926434	-0.00445129	0.0148977	-0.0602417	0.0161879
EPB42_HUMAN	0.392831	0.272191	-0.491366	-0.271678	1.9941	-0.141241	0.160546	-0.487692
EPCR_HUMAN	-0.160765	0.285581	0.127263	-0.00705402	0.261475	-0.0193548	0.154729	-0.0574854
EPDR1_HUMAN	0.0215405	-0.00334634	0.0794818	-0.109973	-0.0470868	0.0211193	0.0154483	0.00660959
EPG5_HUMAN	-0.028992	-0.00742514	0.0692209	0.00727371	0.372536	0.0814434	-0.0374794	0.155173
EPM2A_HUMAN	0.0374086	-0.139407	-0.0856803	0.135781	-0.0600686	0.0395936	-0.0128548	-0.056906
EPMIP_HUMAN	0.0197005	0.0741053	-0.0269123	-0.0197005	0.0020347	0.0504443	-0.0392367	-0.0215974
EPN1_HUMAN	-0.0133408	-0.0304257	-0.000936009	-0.069932	-0.0386717	0.0604413	-0.0349263	0.00882323
EPN2_HUMAN	0.298505	0.140121	-0.0606853	0.00669986	1.03148	0.439539	-0.00669986	-0.0423013
EPN4_HUMAN	0.0122469	0.00723618	0.0894527	-0.0526314	-0.0110593	0.0808545	-0.0111934	0.00785985
EPS15_HUMAN	0.0482853	0.000838308	-0.00843125	-0.0171386	0.0492474	-0.0808408	-0.0391234	-0.0718447
EPS8_HUMAN	-0.00625354	0.106948	0.00286731	0.0314796	0.00362492	0.0180882	-0.32699	-0.0428153
EPT1_HUMAN	NA	NA	NA	NA	NA	NA	NA	NA
ERAP1_HUMAN	-0.167945	-0.0124494	-0.0540307	0.213951	-0.0606921	0.125947	0.189901	-0.3464
ERAP2_HUMAN	0.424896	-0.329994	0.0287674	-1.19632	0.478658	0.155889	-0.567336	-0.0287674
ERBIN_HUMAN	0.000556155	0.0355651	-0.00758503	-0.115178	0.231516	-0.0674637	0.0189659	-0.160964
ERCC2_HUMAN	0.30259	0.228308	-0.0771503	0.365113	-0.0169786	-0.153549	0.112973	-0.174725
ERF1_HUMAN	0.0599127	0.0237873	-0.0287983	0.0758114	-0.215762	-0.00134499	-0.000297269	0.0298792
ERF3A_HUMAN	0.0809076	-0.0707356	0.106254	-0.00277918	-0.0107014	-0.0134745	0.0177554	-0.0462234
ERF3B_HUMAN	0.0190814	0.0553387	0.00670769	0.0623585	-0.141632	-0.0190814	0.065301	-0.0713558
ERG24_HUMAN	-0.136902	0.180502	-0.152971	0.0509844	0.0205503	0.279988	0.0156334	-0.0300386
ERG7_HUMAN	-0.0745779	0.0917774	0.194443	-0.0141344	-0.0962891	0.0694341	0.139265	-0.193537
ERGI1_HUMAN	0.108003	-0.102068	0.0112226	0.144452	0.110476	-0.0347403	-0.0112226	-0.0119715
ERGI3_HUMAN	0.18601	0.183212	-0.0351834	0.0351834	-0.191155	-0.179988	-0.0530418	0.0835421
ERH_HUMAN	-0.209341	0.00932908	-0.0358524	-0.105068	0.0617447	0.25164	-0.0673786	0.311949
ERI3_HUMAN	0.0253866	-0.0780334	0.0359166	0.0687733	-0.0581931	0.00371008	-0.0253872	-0.00371008
ERLEC_HUMAN	0.289819	0.248079	0.0337142	-0.125928	0.788796	-0.0701197	-0.125142	-0.102909
ERLN1_HUMAN	-0.0689337	-0.000941901	-0.288999	0.0570404	0.130915	0.0177532	0.042733	-0.0504374
ERLN2_HUMAN	-0.0146232	0.0386949	-0.0422838	-0.0873955	0.138114	0.093416	0.130886	-0.0298598
ERMAP_HUMAN	0.353185	0.167987	-0.0933576	-0.0509818	1.21771	-0.349417	-0.092339	-0.41202
ERMP1_HUMAN	0.0244207	0.111039	-0.0273937	0.190201	-0.0701853	0.0365183	0.022068	-0.0961054
ERO1A_HUMAN	0.0423705	0.0316055	0.00823302	0.0101777	-0.170601	0.113249	-0.011947	-0.000146177
ERO1B_HUMAN	NA	NA	NA	NA	NA	NA	NA	NA
ERP29_HUMAN	0.00708202	0.00276001	-0.118294	-0.193496	0.0470643	0.138498	0.0168344	-0.0236933
ERP44_HUMAN	-0.0302591	0.0189125	0.221742	0.0314131	0.0383019	0.023901	-0.0865177	-0.0966357
ES1_HUMAN	-0.000994031	-0.205447	0.22279	0.0988842	-0.283176	-0.19094	0.00233555	0.0815381
ESAM_HUMAN	-0.331259	0.0571933	0.0661655	0.0124144	0.237618	-0.189181	-0.0159821	-0.135043
EST1_HUMAN	-0.0567577	0.0711706	-0.0696929	0.0443899	-0.0361149	-0.129621	-0.0563477	-0.264637
EST2_HUMAN	-0.0936184	-0.0197725	0.048067	-0.207066	0.0780853	0.540625	-0.266193	-0.0340144
ESTD_HUMAN	0.0646686	-0.114595	-0.0455681	0.0824405	-0.0816937	0.0528243	-0.0625572	0.0149293
ESYT1_HUMAN	-0.131328	0.109433	0.00360718	-0.0137855	-0.0317932	0.149962	0.0028077	-0.12124
ESYT2_HUMAN	-0.094026	0.0271467	0.0517074	-0.00298379	-0.0224136	0.109598	-0.003349	0.0154869
ETFA_HUMAN	-0.00690173	-0.273608	0.154686	0.197085	-0.39418	-0.305839	-0.00925362	0.130925
ETFB_HUMAN	0.00382088	-0.324055	0.150653	0.1085	-0.353662	-0.355828	0.0287439	0.142772
ETFD_HUMAN	0.0179187	-0.227345	0.129293	0.317482	-0.109319	-0.312469	-0.0510279	0.00696338
ETFR1_HUMAN	0.0356561	-0.411537	0.197604	0.0358139	0.0289665	-0.620496	0.0807502	-0.389374
ETHE1_HUMAN	0.0767297	-0.086714	0.0641621	0.00310551	0.0790552	-0.0769448	0.0448358	-0.0274565
EVI5L_HUMAN	NA	NA	NA	NA	NA	NA	NA	NA
EWS_HUMAN	0.100073	0.0401248	-0.10836	0.00227935	0.133707	0.0137202	-0.0444549	0.0426769
EXC6B_HUMAN	0.103923	0.0051564	0.0293443	-0.0051564	0.029577	0.225017	-0.142149	-0.138843
EXD2_HUMAN	-0.0584944	-0.200794	0.0644319	-0.137527	0.0616947	-0.0282345	-0.023268	0.0461859
EXOC1_HUMAN	0.0136845	0.314863	-0.110077	0.123708	-0.0136845	-0.0179699	-0.0527834	0.0159121
EXOC2_HUMAN	0.0470976	0.181548	0.0646833	-0.0964784	-0.0312451	0.126496	0.0163999	0.00408484
EXOC3_HUMAN	0.640208	0.729984	0.0361115	-0.0990487	-0.0361115	2.16788	-0.07991	0.0751392
EXOC4_HUMAN	-0.0281046	0.11815	0.0213263	-0.0568407	0.00738347	-0.018737	-0.116345	0.219112
EXOC5_HUMAN	0.0235575	0.0865283	-0.0793757	-0.0259062	-0.087694	0.0848832	-0.0130444	0.0922307
EXOC6_HUMAN	0.0561194	0.182327	0.00896084	-0.164324	-0.0358235	0.00555412	0.0104551	-0.00555412
EXOC7_HUMAN	0.00477084	0.128811	0.0102314	-0.034595	0.0648499	0.00599243	0.053263	-0.0227002
EXOC8_HUMAN	0.00361791	0.043523	-0.0170135	0.0496233	0.0946287	-0.02309	-0.196772	0.00447197
EXOG_HUMAN	-0.164208	-0.13466	0.400957	-0.0648729	-0.121988	0.0648729	0.242891	0.126789
EXOS1_HUMAN	NA	NA	NA	NA	NA	NA	NA	NA
EXOS2_HUMAN	-0.102291	0.0628678	-0.023373	-0.0471693	-0.0280483	0.116373	-0.020024	0.0272308
EXOS3_HUMAN	NA	NA	NA	NA	NA	NA	NA	NA
EXOS5_HUMAN	-0.256514	-0.0144532	0.0257712	-0.0144184	0.00845895	0.0256783	-0.00748304	0.196195
EXOS6_HUMAN	0.0828031	-0.0864602	0.0271104	-0.594927	0.249237	0.152577	-0.135793	0.0202823
EXOS7_HUMAN	0.00932961	0.00265581	-0.00932961	0.0235626	-0.0930276	0.0398571	0.121829	0.135401
EXOS8_HUMAN	0.0440192	0.0172573	-0.214745	-0.0700426	-0.143503	0.0206536	0.0318965	0.109713
EXT2_HUMAN	NA	NA	NA	NA	NA	NA	NA	NA
EYA4_HUMAN	-0.112591	0.117426	-0.267134	-0.0199853	0.184708	0.156003	-0.210636	-0.275737
EZRI_HUMAN	-0.168594	-0.031346	0.267383	0.0828692	-0.075505	-0.0198016	-0.0552915	0.0068348
F1142_HUMAN	0.0838122	-0.0320076	-0.155707	0.106674	0.0879403	0.0182099	-0.153662	0.0289676
F118B_HUMAN	-0.03165	-0.0013816	-0.231675	-0.0241884	-0.07023	-0.018454	0.075998	0.201322
F120A_HUMAN	0.00410246	-0.0320989	-0.0028701	0.0107098	-0.0768573	0.0513539	-0.0162636	0.0325655
F120B_HUMAN	0.207893	-0.00838465	-0.106639	-0.0036061	-0.0630039	0.0399686	0.00491515	-0.0918292
F120C_HUMAN	-0.0713586	0.0462649	-0.0183724	0.461657	-0.0587997	0.12999	0.077171	-0.189986
F136A_HUMAN	-0.00225729	-0.265597	0.245005	0.0421142	-0.166437	-0.364398	0.263277	-0.0463737
F13A_HUMAN	0.0802468	0.215865	-0.249303	-0.348776	0.99475	-0.0856967	0.123867	-0.121869
F13B_HUMAN	0.27957	0.183777	-0.180133	-0.245208	0.85707	-0.0486871	0.078392	-0.61558
F162A_HUMAN	-0.0192938	-0.329371	0.180313	0.432598	-0.158651	-0.209912	0.152225	-0.0319774
F16A1_HUMAN	-0.0745016	0.053528	-0.00243599	0.310418	-0.12775	0.118248	-0.229095	-0.0183715
F16A2_HUMAN	0.228847	-0.0193528	-0.462808	0.386496	0.450101	-0.0147067	-0.153792	0.143458
F16B1_HUMAN	-0.142795	0.158691	-0.0534905	0.0261319	-0.136015	0.158601	-0.233822	0.205797
F16B2_HUMAN	0.264485	-0.0529078	0.20742	-0.109538	0.0529078	0.227126	-1.10477	-0.126251
F16P2_HUMAN	0.271865	-0.41352	-0.0513996	0.245292	-0.121954	-0.0867092	0.119086	-0.0719047
F177A_HUMAN	-0.0288031	0.081258	-0.0954458	-0.0623182	0.0864899	-0.181302	-0.115825	0.0329612
F185A_HUMAN	0.0271126	-0.0842725	0.0122064	0.0741966	-0.0700577	-0.00148105	0.0606303	-0.0033159
F192A_HUMAN	0.0252803	0.00474731	-0.00889363	-0.172434	-0.0163438	0.0709743	-0.177539	0.357255
F210A_HUMAN	-0.138169	-0.424554	0.147363	0.3317	-0.429577	-0.368494	0.0542147	-0.00755701
F213A_HUMAN	0.270841	0.124947	-0.194972	-0.100751	-0.0375993	-0.130301	0.00637044	-0.115968
F234A_HUMAN	-0.152842	0.108085	-0.0450752	-0.121092	-0.315398	0.166441	-0.27448	0.0450752
F241B_HUMAN	-0.0035757	0.0826985	0.197472	-0.0624912	-0.19131	0.0718393	-0.0859793	-0.180998
F261_HUMAN	0.0143573	0.0221611	0.0353873	0.0429042	-0.126068	0.0238066	-0.0689185	-0.00786462
F262_HUMAN	-0.11292	0.35955	-0.060562	-0.0164346	-0.103924	-0.0310366	-0.197837	0.156229
FA10_HUMAN	NA	NA	NA	NA	NA	NA	NA	NA
FA11_HUMAN	NA	NA	NA	NA	NA	NA	NA	NA
FA12_HUMAN	0.259863	0.337956	-0.162421	-0.201282	-0.0687487	-0.243788	-0.00930503	-0.100861
FA45A_HUMAN	NA	NA	NA	NA	NA	NA	NA	NA
FA49B_HUMAN	0.0616651	0.0390238	-0.0415439	0.0102809	-0.0577695	0.136075	-0.158861	0.0348093
FA5_HUMAN	0.322431	0.225151	-0.125466	-0.0820929	1.07297	-0.140986	-0.1621	-0.301791
FA50A_HUMAN	0.341515	-0.0476986	-0.0447981	0.186141	0.0384983	-0.00535912	-0.0483628	0.00535912
FA9_HUMAN	0.162804	-0.00738868	-0.0476687	-0.0533256	0.0533632	-0.156469	0.058313	-0.00974081
FA98A_HUMAN	0.00780797	-0.0395387	0.0871068	0.0019809	-0.218534	0.0617932	0.0349502	-0.0157152
FA98B_HUMAN	-0.0342177	0.262438	-0.0770492	-0.0314507	-0.0510877	0.307515	-0.0545906	0.0261356
FAAA_HUMAN	0.0240875	-0.355879	0.0579207	-0.0685036	0.128488	0.0991299	-0.0186044	-0.0481024
FAAH1_HUMAN	-0.00338735	-0.0161296	-0.0355784	-0.0272216	0.012567	-0.0380503	0.0252296	0.0182031
FABD_HUMAN	-0.159222	-0.109932	0.100689	-0.00390139	-0.168671	-0.0402247	0.0204637	0.044446
FABP4_HUMAN	0.0441972	-0.215128	0.0252806	0.17407	-0.284704	-0.0819515	-0.0607405	0.000594618
FABP5_HUMAN	0.0191983	-0.301986	0.0869628	0.071027	-0.183386	0.0848098	-0.0770513	-0.00613467
FABPH_HUMAN	0.27085	-0.329431	-0.0261932	0.0948002	-0.764286	-0.731917	-0.536568	0.368485
FACE1_HUMAN	-0.0787047	0.043054	0.155731	0.115079	-0.206165	-0.134285	-0.0599693	-0.0603934
FAD1_HUMAN	-0.31253	-0.109918	0.280006	0.00536891	-0.208189	-0.196331	0.04116	0.0487145
FADD_HUMAN	0.0527545	0.190116	-0.00750897	-0.169071	0.105537	0.0420978	-0.156384	-0.172558
FAF1_HUMAN	0.0205529	0.0170859	0.0170193	0.0178224	-0.126552	-0.00836335	0.0080038	0.0314495
FAF2_HUMAN	0.0411098	0.0804326	0.0482219	-0.11234	-0.252427	-0.116463	0.0415287	0.0848641
FAH2A_HUMAN	-0.193333	-0.287259	0.10574	0.147802	-0.436123	-0.0710334	-0.00716715	0.0710334
FAHD1_HUMAN	0.0222018	-0.160443	0.129571	0.110017	-0.13761	-0.233875	0.0117679	0.070676
FAK1_HUMAN	0.00949377	0.105311	0.0512873	-0.00602917	0.0596019	-0.00949377	-0.0739003	-0.0313659
FAKD1_HUMAN	-0.00351835	-0.156863	0.269511	0.0556092	0.107058	-0.1445	-0.450468	0.00878454
FAKD2_HUMAN	0.199468	-0.0116236	-0.0174337	0.397449	-0.202544	-0.063898	0.0337634	-0.10082
FAKD3_HUMAN	NA	NA	NA	NA	NA	NA	NA	NA
FAKD4_HUMAN	-0.0946641	-0.0496129	0.165659	0.103668	-0.169376	-0.0243326	0.0919512	0.0243326
FAKD5_HUMAN	0.0652778	-0.507679	0.0279024	0.388541	-0.0279024	-0.0668951	-0.134869	0.316001
FAM3C_HUMAN	-0.00138255	0.0253197	0.0518877	0.0643265	-0.0917081	0.0751918	-0.0957978	-0.0272178
FARP1_HUMAN	0.185207	0.0147263	0.0901555	0.0522234	-0.315328	0.0413125	-0.0286594	0.0716726
FAS_HUMAN	0.0244045	0.0470809	0.0622975	-0.214305	0.241292	-0.133896	-0.0262844	-0.125505
FASTK_HUMAN	NA	NA	NA	NA	NA	NA	NA	NA
FBLN1_HUMAN	-0.0495146	0.244937	-0.205071	0.06864	0.848488	-0.0378352	-0.0349431	-0.0863969
FBLN2_HUMAN	-0.260196	0.458336	-0.0281461	0.0425222	0.229678	0.319633	-0.142469	-0.0342823
FBLN3_HUMAN	-0.168258	0.215425	-0.0255565	0.102696	0.228148	0.0992127	-0.139955	-0.0792678
FBLN4_HUMAN	-0.0628814	0.0809886	0.17476	-0.0456428	0.0681427	-0.129592	-0.0578944	0.00693625
FBLN5_HUMAN	-0.457106	0.147524	0.0614733	0.32621	0.116408	0.166316	-0.296572	-0.333646
FBN1_HUMAN	-0.0484432	0.42971	-0.160218	-0.0332755	0.480496	-0.0596878	0.0169749	0.0222327
FBP1L_HUMAN	-0.112703	-0.0643767	0.0470236	0.0295569	-0.0873439	0.0547156	-0.0880025	0.0762879
FBRL_HUMAN	-0.0866118	-0.0336791	-0.05852	-0.0925838	0.0139145	0.202478	7.04e-05	0.162954
FBX22_HUMAN	-0.0212188	0.112029	-0.0422399	0.0259376	-0.114899	0.0869737	0.0212188	-0.107059
FBX3_HUMAN	-0.0412225	-0.0476727	-0.129581	0.204588	0.0906339	0.0449481	-0.283546	0.1141
FBX30_HUMAN	0.260926	0.936646	0.0366824	-0.146962	-0.0680714	-0.0366824	0.327144	0.976007
FBX32_HUMAN	NA	NA	NA	NA	NA	NA	NA	NA
FBX40_HUMAN	0.155099	-0.0441222	-0.0243904	0.148064	-0.296124	-0.0414495	-0.103625	0.0107116
FBX41_HUMAN	NA	NA	NA	NA	NA	NA	NA	NA
FBX6_HUMAN	0.216752	0.0349641	0.00278218	0.1571	-0.0887943	-0.0250436	-0.171533	-0.00278218
FBX7_HUMAN	0.392869	0.111719	-0.320909	-0.228237	0.863825	-0.112565	0.0813198	-0.231003
FBXL8_HUMAN	0.0328088	0.229226	-0.10143	0.0662624	0.046274	0.189721	0.0908052	-0.224144
FBXW5_HUMAN	0.438557	0.00225756	-0.652475	0.0986228	-0.00225756	0.691426	-0.730083	-0.0991667
FCG2A_HUMAN	NA	NA	NA	NA	NA	NA	NA	NA
FCG3A_HUMAN	NA	NA	NA	NA	NA	NA	NA	NA
FCG3B_HUMAN	0.53933	-0.0128344	-0.2899	-0.762595	1.97251	0.02878	0.374273	-0.319189
FCGRN_HUMAN	0.0133096	0.337986	-0.0465017	-0.0670264	0.278027	1.91e-05	-0.035056	0.0779205
FCHO2_HUMAN	0.0242027	0.410335	-0.270253	-0.15948	0.771329	0.110545	-0.0494583	-0.120123
FCL_HUMAN	0.386584	0.150243	-0.208405	-0.18141	0.717808	0.00572385	0.0618148	-0.43071
FCN3_HUMAN	0.376162	0.0330405	-0.0330405	-0.297484	0.189852	0.0671929	-0.134537	-0.108475
FDX2_HUMAN	-0.0465939	-0.0739031	0.295816	-0.127594	-0.202908	0.0535135	-0.219405	0.164927
FEM1A_HUMAN	0.060487	0.0396651	0.0493873	-0.0245751	0.0804364	0.0406157	0.0104798	-0.0331413
FEN1_HUMAN	-0.032366	0.0953902	-0.147197	0.155376	0.0255473	0.0194818	-0.0695022	0.0742847
FERM2_HUMAN	-0.0485674	0.0543696	0.00764918	0.144983	-0.0578548	0.0488565	-0.0369966	0.0122737
FES_HUMAN	NA	NA	NA	NA	NA	NA	NA	NA
FETUA_HUMAN	0.427209	-0.00585158	-0.104505	-0.0353721	-0.151888	0.0760253	-0.0229753	-0.192588
FEZ2_HUMAN	-0.0158407	0.360067	-0.340668	0.0158407	-0.0666778	0.121154	-0.378132	0.0631425
FGD4_HUMAN	-0.0770066	0.0793341	0.138858	0.0808642	0.168538	-0.141651	-0.0355147	-0.0325405
FGGY_HUMAN	-0.0586646	0.124607	-0.1484	0.180133	-0.00809711	0.0277346	-0.0310909	0.0639813
FGL1_HUMAN	0.138729	0.0698109	0.155849	-0.106197	1.79197	-0.200736	0.433644	-0.239151
FGOP2_HUMAN	NA	NA	NA	NA	NA	NA	NA	NA
FHIT_HUMAN	0.0389181	-0.122114	0.0760565	0.0401549	-0.255583	-0.175694	-0.0401549	0.119097
FHL1_HUMAN	0.117092	-0.0577579	-0.0375504	0.107555	-0.335633	0.0966689	-0.187378	0.00992413
FHL2_HUMAN	-0.0533768	0.144274	-0.0769555	0.191885	0.0300609	-0.172967	-0.125739	0.422408
FHL3_HUMAN	0.0418601	-0.022299	-0.0588149	0.0941384	-0.0624144	-0.078501	0.136072	-0.0493482
FHOD1_HUMAN	-0.0866569	-0.0355513	0.0448283	-0.00373608	-0.0537053	0.264732	-0.0149192	-0.00470522
FHOD3_HUMAN	0.058686	0.24217	0.342877	0.0205793	0.340517	0.0717542	-0.390947	-0.315186
FHR2_HUMAN	0.512228	-0.423068	-0.164776	-0.21562	0.70769	-0.0689704	0.331351	0.0513998
FHR5_HUMAN	0.609178	-1.20104	-0.643516	-0.222409	0.89734	-0.637385	0.174646	0.200793
FIBA_HUMAN	0.0283382	0.142153	-0.154325	-0.225533	1.30734	-0.0788935	0.170539	-0.231436
FIBB_HUMAN	0.0049145	0.182931	-0.139664	-0.259847	1.69186	-0.0631958	0.203206	-0.291721
FIBG_HUMAN	0.0163148	0.311156	-0.211256	-0.380081	2.05722	-0.0889695	0.277702	-0.367188
FINC_HUMAN	0.0183024	0.241942	-0.102265	-0.120862	0.923745	-0.0717354	0.0748849	-0.229398
FIP1_HUMAN	-0.0461851	0.0288953	0.0569885	-0.0444027	-0.0450242	0.0869265	0.0227753	0.26252
FIS1_HUMAN	-0.00191655	-0.191299	0.059482	0.103136	-0.154232	-0.029467	0.0370572	0.145888
FITM1_HUMAN	-0.0801996	0.0255685	-0.0665614	0.0639372	-0.32374	-0.196623	0.117449	-0.056422
FITM2_HUMAN	NA	NA	NA	NA	NA	NA	NA	NA
FKB10_HUMAN	-0.27367	0.463848	0.247692	0.113968	-0.0387674	0.0387674	-0.378472	-0.0729471
FKB15_HUMAN	-0.153575	-0.0677076	0.0551276	0.068488	0.0758267	0.100167	-0.0200425	-0.0893633
FKB1A_HUMAN	0.0612198	-0.00760939	0.0238383	-0.0775904	0.00141203	0.0187144	0.00299033	-0.0380315
FKBP2_HUMAN	0.0109417	-0.00213631	-0.0545608	-0.200071	0.0104284	0.178494	0.033488	-0.034009
FKBP3_HUMAN	-0.0104342	-0.154034	0.0740019	0.00554473	-0.258384	0.166271	-0.0421727	-0.00179498
FKBP4_HUMAN	0.110795	-0.0415689	-0.0807023	0.00193094	-0.0230961	0.01942	-0.0485986	0.121086
FKBP5_HUMAN	0.0479381	0.0129027	0.172219	-0.032241	-0.205693	-0.0500159	-0.00398407	0.0694701
FKBP7_HUMAN	-0.0872145	0.0126818	0.0639866	0.0639241	-0.0126818	0.344118	-0.0333814	-0.197741
FKBP8_HUMAN	-0.0041402	0.0908011	-0.0127074	-0.0198534	0.00360541	0.117551	-0.0220947	-0.0452712
FKBP9_HUMAN	-0.0882383	0.0169279	0.0756769	-0.0469306	0.0221544	-0.0860115	-0.111215	-0.0169279
FL2D_HUMAN	-0.148996	-0.0242944	0.732278	0.505967	0.126565	-0.00426589	-1.11168	0.12954
FLII_HUMAN	-0.0101717	-0.00639286	0.0436205	-0.0377744	-0.00252145	0.0782238	-0.00870021	-0.0064334
FLIP1_HUMAN	-0.0762543	-0.00195848	0.09997	-0.156134	-0.024415	0.0507509	-0.0264003	0.0208597
FLNA_HUMAN	0.0386518	0.679244	-0.0339349	-0.0434158	0.668223	-0.11055	-0.124379	0.026351
FLNB_HUMAN	-0.0650067	0.261954	-0.00605917	0.207596	0.0316925	-0.0230289	-0.00171403	-0.209893
FLNC_HUMAN	-0.020226	-0.102152	0.0313136	-0.00794597	-0.0816089	0.049386	-0.0106804	0.0371994
FLOT1_HUMAN	0.0421656	0.111817	-0.163968	-0.0601049	0.4177	0.139105	0.01214	-0.1474
FLOT2_HUMAN	0.0181607	0.111349	-0.173782	-0.0842749	0.547752	0.232225	0.0381134	-0.210626
FMC1_HUMAN	0.0360797	-0.114351	0.0463862	0.308936	-0.426679	-0.325305	0.105324	0.136645
FMNL1_HUMAN	NA	NA	NA	NA	NA	NA	NA	NA
FMO3_HUMAN	-0.887073	0.176899	0.407282	0.407518	0.181949	-0.759421	-0.0853119	0.0853119
FMOD_HUMAN	0.491914	0.797764	-0.565905	-0.00855658	0.404704	-0.281366	0.34513	-0.306538
FN3K_HUMAN	0.106653	-0.112747	0.0460732	0.0267176	-0.0369539	0.0105796	-0.0773515	-0.11743
FNBP1_HUMAN	-0.0868432	-0.0879258	0.0369914	0.139559	0.125368	0.00379783	-0.0325213	-0.125269
FND3A_HUMAN	0.294273	0.157046	-0.00414172	0.35809	0.333185	-0.14955	0.00414172	-0.208477
FNDC1_HUMAN	NA	NA	NA	NA	NA	NA	NA	NA
FNTA_HUMAN	-0.0785585	0.032837	0.00203965	0.0927067	-0.11729	-0.0124215	-0.0158496	0.0961854
FNTB_HUMAN	0.145537	-0.0238474	-0.010517	0.196602	0.280052	-0.00606674	-0.123371	0.010517
FOCAD_HUMAN	0.0592335	0.0723285	-0.0706726	0.142185	0.040108	-0.0658702	-0.0321505	-0.0609097
FOLC_HUMAN	0.358101	0.304853	0.365229	-0.0436062	-0.0764921	-0.0161797	-0.236495	0.0161797
FOLR2_HUMAN	-0.096156	0.0580413	0.228008	0.0829601	-0.227029	0.134828	-0.137654	-0.267789
FOXK1_HUMAN	-0.296432	0.190947	-0.352087	0.0807779	0.141059	0.146383	0.0746126	0.345091
FPGT_HUMAN	NA	NA	NA	NA	NA	NA	NA	NA
FPPS_HUMAN	0.046836	-0.0282989	-0.00911045	0.296002	-0.114451	5.99e-05	0.0376122	-0.0219653
FPRP_HUMAN	NA	NA	NA	NA	NA	NA	NA	NA
FR1OP_HUMAN	NA	NA	NA	NA	NA	NA	NA	NA
FRDA_HUMAN	-0.0252297	-0.305325	0.128147	0.0982706	-0.224369	-0.286991	0.0333766	0.185027
FREM2_HUMAN	-0.225036	0.234565	0.028054	-0.165682	0.135477	-0.223198	0.145873	0.19448
FRIH_HUMAN	-0.180881	-0.309249	-0.142302	0.126309	-0.0341239	0.440177	0.048983	0.0950973
FRIL_HUMAN	-0.166349	-0.349905	0.00270464	-0.015204	0.0495907	1.43343	0.0728205	0.230666
FRMD3_HUMAN	-0.417329	-0.0276573	0.372073	0.218961	-0.173339	-0.00894063	0.106505	-0.247665
FRY_HUMAN	0.0288706	0.0365787	-0.124677	-0.144386	0.59746	-0.0684054	-0.00367233	-0.0691511
FRYL_HUMAN	0.318631	0.10999	-0.241635	-0.0801812	0.410482	-0.666672	0.0724457	-0.20306
FSCN1_HUMAN	0.138683	0.119983	-0.123122	0.150818	0.298786	-0.134321	-0.0743528	-0.273148
FSD1L_HUMAN	-0.547705	0.387764	-0.0960651	-0.0846628	0.0979916	0.228089	-0.0842589	-0.0127815
FSD2_HUMAN	0.0468069	-0.102703	0.0414374	0.0364051	-0.145929	-0.0164712	0.0281774	-0.0232204
FUBP1_HUMAN	-0.00873822	-0.00667166	-0.0156544	0.00789982	0.00107515	0.0827059	-0.00289305	0.0954152
FUBP2_HUMAN	-0.0596822	0.0357275	-0.0481527	0.0086455	0.0667903	0.103708	-0.0905645	0.0134251
FUBP3_HUMAN	0.0734445	-0.0753888	0.151135	-0.115943	0.0617268	-0.258721	0.0123177	0.201245
FUCO_HUMAN	0.00934822	0.0348054	-0.178443	-0.225951	0.122894	0.00763068	0.0458987	0.0328814
FUK_HUMAN	-0.0191181	0.0246595	0.0747358	0.119956	0.0109798	-0.0109798	0.0116916	0.0507044
FUMH_HUMAN	-0.0146203	-0.152997	0.17777	0.152586	-0.131578	-0.214851	0.0233142	0.0034468
FUND2_HUMAN	-0.0588323	-0.237507	0.0618904	0.132152	-0.277107	-0.175932	0.115984	0.110901
FUS_HUMAN	-0.0921532	-0.117933	0.122415	-0.0216069	-0.387362	-0.0871172	0.0326715	0.0807827
FUT11_HUMAN	NA	NA	NA	NA	NA	NA	NA	NA
FWCH2_HUMAN	NA	NA	NA	NA	NA	NA	NA	NA
FXL15_HUMAN	1.31564	-0.275303	-0.356184	-0.155456	-0.242145	-0.660442	0.155456	1.1155
FXL18_HUMAN	NA	NA	NA	NA	NA	NA	NA	NA
FXR1_HUMAN	-0.101403	-0.00998385	0.00875729	0.0549505	-0.116505	0.079838	0.0493362	0.00166925
FXR2_HUMAN	-0.0436958	-0.00423062	-0.0150027	-0.180247	0.122504	0.0814215	-0.137468	0.156178
FXRD1_HUMAN	0.039421	-0.207076	0.161873	0.0321041	-0.39294	-0.0286778	0.0100582	0.0554857
FYB1_HUMAN	-0.0614358	0.0893963	-0.0629469	0.0779171	0.868885	-0.130521	0.0452213	0.034196
FYCO1_HUMAN	0.020728	0.0225454	0.0161837	-0.0838043	-0.131149	0.0712016	0.0646969	-0.0421115
FYN_HUMAN	NA	NA	NA	NA	NA	NA	NA	NA
G3BP1_HUMAN	0.0109612	-0.0254517	-0.0217548	0.0488582	-0.0660485	0.00757293	-0.00376555	0.0113002
G3BP2_HUMAN	-0.00745927	-0.00808817	0.000749296	-0.0254214	-0.122132	0.112619	-0.00342934	0.155307
G3P_HUMAN	0.0569466	-0.0696151	0.0269949	0.0716763	-0.172139	-0.00680674	-0.0319315	-0.0307886
G45IP_HUMAN	-0.0129573	-0.219647	0.202236	0.0434956	-0.19325	0.0234313	0.0116104	-0.0255092
G6PD_HUMAN	0.212497	0.278799	0.00746093	-0.121298	0.920313	-0.167991	-0.038337	-0.22796
G6PE_HUMAN	-0.0272007	0.129386	-0.179049	0.0185479	0.141305	-0.0616657	0.0344646	-0.041371
G6PI_HUMAN	0.00900148	-0.194112	0.12791	0.080505	-0.335049	0.0147689	-0.0532745	-0.0377689
G6PT1_HUMAN	-0.893748	0.554728	0.47758	0.366751	0.377418	-0.910808	-0.872657	-0.731746
GABPA_HUMAN	-0.0601893	0.164291	-0.0723661	0.0515189	0.0889029	-0.0195777	0.0502807	0.106988
GAK_HUMAN	NA	NA	NA	NA	NA	NA	NA	NA
GAL3A_HUMAN	NA	NA	NA	NA	NA	NA	NA	NA
GALC_HUMAN	-0.0347932	0.0863966	0.0617169	-0.17647	0.0214698	0.0990167	-0.101283	0.150946
GALD1_HUMAN	0.166206	0.208671	-0.144678	0.105006	-0.0419076	0.232232	-0.135214	0.209364
GALE_HUMAN	-0.20474	0.140132	0.235813	-0.0359145	0.213758	0.0208633	-0.496012	0.00876572
GALK1_HUMAN	0.308109	-0.00903248	-0.231232	0.22978	0.0658696	-0.04039	-0.193326	-0.137908
GALK2_HUMAN	NA	NA	NA	NA	NA	NA	NA	NA
GALM_HUMAN	0.050598	0.0146796	-0.0554708	0.170072	-0.273779	0.00935183	-0.145823	-0.0281334
GALNS_HUMAN	-0.0133523	-0.073034	0.184219	-0.100139	0.115192	0.0133523	-0.227472	0.0359093
GALT_HUMAN	-0.112555	-0.0364805	0.0927487	0.0568894	0.061723	0.167047	-0.11398	-0.0568894
GALT2_HUMAN	-0.0632978	0.0770482	0.0062281	-0.124784	0.294876	0.0941118	0.00117077	-0.00878179
GAMT_HUMAN	0.015146	-0.0137627	0.0160884	-0.0312561	-0.0947206	0.311882	-0.115414	0.0538706
GANAB_HUMAN	0.00258175	-0.0130192	0.023513	-0.0259346	0.00390493	-0.000760938	-0.0116725	0.00242716
GANC_HUMAN	-0.0120826	-0.157166	0.091439	0.0795111	-0.17025	0.588143	0.119979	-0.223532
GANP_HUMAN	-0.0073509	0.0924281	0.0225972	0.168434	0.0425296	0.00801167	-0.25658	0.0672769
GAPD1_HUMAN	-0.133895	0.0759467	-0.112999	-0.0302093	0.152048	0.0264228	0.00430624	0.0529683
GAPR1_HUMAN	0.0865533	0.116937	0.0128612	-0.0695786	0.788211	-0.0645676	-0.0128612	-0.0776231
GAR1_HUMAN	-0.0310709	0.0689799	-0.0478056	-0.100042	0.0538641	0.207249	0.0449227	0.00989094
GARS_HUMAN	-0.0417967	-0.0978113	0.0814596	0.0166571	-0.1779	-0.00695334	-0.0322848	0.0784736
GAS6_HUMAN	-1.35711	-0.208607	-0.0289756	0.136398	0.071538	-0.141331	0.252582	0.0465016
GATA_HUMAN	0.012901	-0.00735516	0.084246	0.109677	-0.326238	-0.258564	0.154517	-0.0670866
GATB_HUMAN	0.0705281	-0.20636	0.0772067	-0.0639234	-0.230987	0.00291603	-0.053608	0.0981722
GATC_HUMAN	-0.00677159	-0.410629	0.175556	0.129412	-0.225655	-0.0639674	0.0149865	-0.0951761
GATM_HUMAN	0.0708452	-0.279446	-0.110402	0.110368	-0.0179035	-0.0661401	0.0159492	-0.0473043
GBB1_HUMAN	0.0424771	0.0393528	-0.139203	0.0853966	0.00297459	0.0043398	-0.0205488	-0.130579
GBB2_HUMAN	-0.0517627	0.00224474	-0.106929	0.00379047	0.0346602	0.111514	-0.012441	-0.00279094
GBB3_HUMAN	NA	NA	NA	NA	NA	NA	NA	NA
GBB4_HUMAN	-0.166991	0.176775	-0.211036	0.285902	0.0249618	-0.332841	-0.127571	0.109878
GBF1_HUMAN	-0.0136755	0.0266874	0.143249	0.0261066	0.00987227	-0.0173733	-0.00247672	0.125719
GBG12_HUMAN	-0.0851879	0.231382	-0.234704	-0.0187766	0.240875	0.19527	-0.196548	-0.275775
GBP1_HUMAN	-0.782625	-0.556241	0.398625	0.336959	0.0285064	0.259092	-1.08576	0.186273
GBP2_HUMAN	-0.184199	0.089942	-0.0399726	-0.138868	0.0583688	0.166798	-0.127371	0.130852
GBP4_HUMAN	NA	NA	NA	NA	NA	NA	NA	NA
GBRAP_HUMAN	-0.126727	-0.0240485	-0.0988615	0.137699	-0.398766	0.304638	0.0240485	0.0815542
GBRL2_HUMAN	0.0185585	-0.00497708	0.0879624	-0.12686	-0.100879	0.0559447	-0.0334631	0.179611
GCC2_HUMAN	0.0738933	0.0369393	0.0530457	0.0352002	0.0325833	0.0140555	-0.00118405	-0.107551
GCDH_HUMAN	0.00785329	-0.0200466	0.114888	0.142613	-0.0950822	-0.0973802	-0.104473	0.12835
GCFC2_HUMAN	-0.0679944	0.274354	-0.182088	0.0746574	-0.00752307	-0.0568838	-0.066786	0.536445
GCN1_HUMAN	-0.0540186	0.0419877	0.0323985	-0.000872739	0.000872739	0.13982	-0.0460653	0.0420746
GCP2_HUMAN	0.00525898	0.0812871	-0.0916858	0.0135878	0.122576	-0.0996129	-0.0127486	0.0963013
GCP3_HUMAN	0.023415	0.0115744	-0.11951	0.0608593	0.116655	0.00777279	-0.00370101	0.0901067
GCP4_HUMAN	NA	NA	NA	NA	NA	NA	NA	NA
GCP6_HUMAN	NA	NA	NA	NA	NA	NA	NA	NA
GCP60_HUMAN	-0.0258652	0.0713453	0.042166	-0.0161499	0.0559856	0.00902666	-0.143582	0.0357259
GCR_HUMAN	0.114204	-0.0466773	0.109033	0.118429	-0.0997346	-0.0744321	-0.0529667	0.0472007
GCSH_HUMAN	-0.0107608	-0.292181	0.334747	0.107936	-0.393315	-0.325853	0.0334336	-0.00327149
GCYB1_HUMAN	-0.00621286	0.0666753	0.17026	0.279685	-0.0666753	-0.118019	-0.0207688	-0.196822
GDC_HUMAN	NA	NA	NA	NA	NA	NA	NA	NA
GDE_HUMAN	0.0230282	-0.0757195	-0.00422431	0.0647234	-0.0137107	0.0148022	0.00999763	-0.0486942
GDE1_HUMAN	0.0483809	-0.034545	-0.00303244	-0.472131	-0.0521622	0.36337	0.246469	0.237119
GDIA_HUMAN	-0.0122414	-0.0795372	-0.0687001	0.0122414	-0.0131405	0.174695	-0.071225	0.181209
GDIB_HUMAN	0.0557375	-0.0233444	-0.0834323	0.025816	-0.0162992	0.0382232	-0.026867	-0.00796784
GDIR1_HUMAN	0.0507618	-0.0043421	-0.12967	-0.0125834	-0.0479358	0.159537	-0.198486	0.219604
GDIR2_HUMAN	0.0437689	-0.00510636	0.0348828	0.0141739	0.444031	-0.045881	-0.036052	-0.119502
GDPD1_HUMAN	0.178833	0.029158	-0.04007	0.0257693	0.0639217	0.0455181	-0.142788	-0.24788
GDPP1_HUMAN	0.0743527	-0.0422538	0.0305167	-0.1291	0.0898692	0.144415	0.0929051	-0.220068
GELS_HUMAN	0.0128229	0.257294	-0.12496	0.0550983	0.045528	0.19325	-0.120267	-0.18933
GEMI5_HUMAN	0.0963882	0.0887599	-0.0685912	-0.123201	0.187385	0.032366	0.0433519	-0.0434431
GEMI7_HUMAN	0.0703933	0.0176756	0.218932	0.096984	-0.082434	-0.0747269	-0.541926	-0.0176756
GEPH_HUMAN	0.005291	0.00496259	0.294247	0.0192841	-0.121962	0.0318367	-0.0782565	-0.0202141
GET4_HUMAN	0.0166864	0.00595901	-0.0937931	0.432832	-0.0470368	-0.0147902	-0.107355	0.0027029
GFPT1_HUMAN	-0.102668	-0.0176542	-0.00311858	0.15016	-0.0457747	0.0293758	0.0149751	-0.0422284
GGA1_HUMAN	0.106651	-0.0492352	0.131503	0.0361407	0.0890326	0.00424718	-0.0276636	0.00660646
GGA2_HUMAN	0.213114	0.00653178	0.0457035	0.129487	-0.173363	0.152443	-0.00653178	-0.211714
GGA3_HUMAN	-0.0140369	-0.0915633	0.156319	0.239458	-0.0843175	-0.074533	0.143919	0.0140369
GGACT_HUMAN	0.0920497	-0.0760119	-0.0957925	0.408989	-0.195104	0.16551	0.0875311	-0.150692
GGCT_HUMAN	0.0894321	-0.149833	0.160959	0.120326	-0.289754	-0.073363	-0.139453	-0.0623844
GGH_HUMAN	0.00818674	0.116842	-0.194463	0.0494746	0.0369955	0.0164243	-0.240333	0.290206
GGPPS_HUMAN	-0.0119701	-0.0341898	0.0366269	-0.105269	0.0115322	0.0437075	-0.0323821	-0.0822809
GGT5_HUMAN	-0.0842066	0.284661	0.096538	-0.0168507	0.173088	-0.251421	0.000443129	-0.00603665
GGT7_HUMAN	0.0601718	0.0842644	0.0103876	0.00249361	-0.00249361	-0.048277	0.198608	0.116199
GGYF1_HUMAN	NA	NA	NA	NA	NA	NA	NA	NA
GGYF2_HUMAN	-0.0205747	-0.0221476	-0.120921	-0.000981276	-0.22298	0.0404523	-0.000276084	0.0828127
GHDC_HUMAN	NA	NA	NA	NA	NA	NA	NA	NA
GID8_HUMAN	0.464815	0.246799	-0.044618	0.491415	0.423966	0.00417751	-0.0833659	-0.0884435
GIMA1_HUMAN	-0.0837114	0.117412	-0.0212228	-0.0189685	0.377572	-0.0410626	-0.0134988	0.0179185
GIMA4_HUMAN	-0.560361	0.191129	0.107335	-0.285227	-0.125488	-0.428762	0.215963	0.275066
GIMA5_HUMAN	0.0478846	-0.269702	-0.165307	0.289695	-0.367927	-0.0427178	0.0696802	0.0427178
GIMA7_HUMAN	0.0708779	-0.0626363	0.0507404	0.278448	-0.0803967	-0.111439	0.0352677	-0.0161658
GIMA8_HUMAN	0.0387392	0.162688	-0.237446	0.230096	0.000841846	0.0187875	-0.115541	-0.0251704
GIPC1_HUMAN	-0.00237323	0.0263041	-0.0866993	-0.0263041	0.0334462	0.113973	-0.169841	0.0398574
GIPC3_HUMAN	NA	NA	NA	NA	NA	NA	NA	NA
GIT1_HUMAN	0.0132708	0.191406	-0.109513	0.0050784	-0.0196158	-0.128984	0.0833564	0.104614
GIT2_HUMAN	0.0122879	-0.0926495	-0.049372	0.0363768	-0.0638636	0.192199	-0.0244143	0.0607366
GLE1_HUMAN	-0.192124	-0.105842	0.118433	-0.0229296	0.265968	0.331709	-0.12457	-0.0306616
GLGB_HUMAN	0.084998	-0.0517592	0.0885941	0.044907	-0.321432	-0.216412	-0.0511254	0.0828257
GLMN_HUMAN	NA	NA	NA	NA	NA	NA	NA	NA
GLNA_HUMAN	-0.0260302	0.0082317	0.101466	0.0665449	-0.0145913	-0.114608	-0.111191	0.0849837
GLO2_HUMAN	0.0366341	-0.0949952	-0.002715	-0.00432132	-0.142121	0.0508809	-0.00912997	0.0511795
GLOD4_HUMAN	0.0259974	-0.112589	-0.079339	-0.00418171	0.0242529	0.113574	-0.0364149	0.06257
GLPA_HUMAN	0.07643	0.193271	0.0579074	-0.307319	0.701948	-0.164531	0.125329	-0.141315
GLPC_HUMAN	0.0653532	-0.129126	0.0034784	-0.14097	0.122569	0.150492	0.118961	-0.458367
GLRX1_HUMAN	0.156902	-0.0292014	-0.19982	-0.0293415	-0.0750758	0.255855	0.00884559	0.0424592
GLRX2_HUMAN	0.0735752	-0.875849	0.345662	0.161567	-0.109945	-0.0804479	0.0390412	-0.46629
GLRX3_HUMAN	0.195197	-0.230656	0.165289	-0.00078085	0.0680865	-0.194933	-0.0251944	-0.151801
GLRX5_HUMAN	-0.198378	-0.172459	0.139066	0.104654	-0.214044	-0.10442	0.100136	0.0716047
GLSK_HUMAN	0.0387688	-0.0383469	0.0776977	0.281745	-0.0932507	-0.0227004	0.0227004	-0.0618463
GLTP_HUMAN	-0.000323585	-0.081385	0.215018	0.216729	-0.226141	-0.0270819	-0.0743767	0.0516041
GLU2B_HUMAN	0.00605307	0.00657801	-0.109006	0.0139572	-0.0189078	0.0463005	0.0259851	-0.0391901
GLUCM_HUMAN	0.240718	0.0253902	0.310398	-0.0378563	0.00249039	-0.305893	-0.07756	-0.0511595
GLYC_HUMAN	0.00419023	-0.104319	-0.125773	-0.16011	-0.125747	0.377554	0.0487506	0.0869065
GLYG_HUMAN	-0.160786	-0.145609	0.257622	-0.0454413	-0.0823431	-0.07503	0.0386297	-0.0373629
GLYM_HUMAN	0.00307464	-0.120412	0.200187	0.102329	-0.0833976	-0.0232061	0.0395056	-0.029905
GLYR1_HUMAN	-0.143069	-0.0104964	-0.0969379	0.0296938	0.0464781	0.0716154	-0.0266826	0.0791561
GMDS_HUMAN	0.231127	0.218804	-0.0887559	0.195768	0.933589	-0.00624933	0.00624933	-0.265869
GMFB_HUMAN	0.105219	0.018137	-0.0157376	-0.0348845	-0.0167072	0.237023	-0.12185	0.110919
GMFG_HUMAN	0.363416	0.0984879	-0.0471713	-0.127873	1.13702	-0.0496786	0.091846	-0.273749
GMPPA_HUMAN	0.134917	0.0407614	-0.122043	0.0729706	0.312188	-0.204138	-0.0971888	0.0231489
GMPPB_HUMAN	0.108081	-0.0137302	-0.0441015	-0.043693	0.0768608	0.289627	-0.0290759	0.240704
GMPR1_HUMAN	0.18799	0.0018184	-0.159707	-0.138136	-0.0429644	0.188646	0.016028	0.0845365
GMPR2_HUMAN	0.00962611	-0.00808239	-0.0300502	-0.136531	0.0866782	0.0917481	-0.0209213	0.0360247
GNA1_HUMAN	0.411506	-0.000906187	-0.0757043	0.225684	-0.365728	-0.00391838	-0.0240887	0.0770321
GNA11_HUMAN	0.136619	0.117596	-0.0563163	-0.0983979	0.206437	-0.0800779	0.19724	-0.229472
GNA13_HUMAN	-0.0801521	0.142615	0.0179189	-0.044954	0.236642	0.044954	-0.0582517	-0.116974
GNAI1_HUMAN	0.159338	-0.0218408	0.0215513	0.329306	-0.0502121	0.160807	0.0186523	-0.0962808
GNAI2_HUMAN	-0.028491	0.0986056	-0.216789	0.0856568	0.328085	-0.0140998	-0.0620708	-0.0148543
GNAI3_HUMAN	0.112204	0.239843	-0.0821431	0.142966	0.462372	-0.0413626	-0.0343203	-0.16287
GNAO_HUMAN	NA	NA	NA	NA	NA	NA	NA	NA
GNAQ_HUMAN	-0.00469324	0.315654	0.0134563	0.0581962	0.503382	-0.0412266	-0.0724316	-0.0749576
GNAS1_HUMAN	-0.0107611	0.0174826	-0.177298	0.0547004	0.00643659	0.169557	0.0131559	-0.0035765
GNAZ_HUMAN	0.0953947	0.0233612	-0.205599	0.0622486	0.658697	-0.138823	-0.0832618	-0.271724
GNL1_HUMAN	0.175288	-0.0997126	-0.141708	-0.0922021	0.0472949	0.242961	-0.188494	-0.00352451
GNL3_HUMAN	-0.0227824	-0.119133	-0.42682	0.0283667	0.00518238	-0.120207	0.0494881	0.0438908
GNPAT_HUMAN	-0.227763	0.0111896	0.032965	0.162518	-0.0149972	-0.228099	0.0913413	-0.0111896
GNPI1_HUMAN	0.12099	-0.025449	-0.0417152	0.0591811	-0.156435	0.0322479	-0.0556151	0.143654
GNPI2_HUMAN	-0.0533491	-0.0266772	0.0559044	0.0277845	-0.234055	-0.0402154	-0.11837	0.121002
GNS_HUMAN	-0.0165865	0.0688595	-0.0289836	-0.0067735	0.0674724	-0.180148	-0.0202868	0.150729
GOGA2_HUMAN	-0.0196745	0.0606709	0.0383841	-0.145486	0.406429	0.00623472	-0.01922	0.0535441
GOGA3_HUMAN	-0.0740754	0.205218	-0.00733027	-0.0356385	-0.00644548	0.302477	-0.0159466	-0.0685621
GOGA4_HUMAN	0.0684714	0.0131431	0.0112183	-0.0471571	-0.00751609	-0.0419578	0.0207443	-0.0163487
GOGA5_HUMAN	-0.543344	0.170954	0.282382	-0.556094	0.0238925	-0.400526	0.160267	-0.118542
GOGA7_HUMAN	NA	NA	NA	NA	NA	NA	NA	NA
GOGB1_HUMAN	-0.0965984	0.120342	0.231989	-0.0697445	0.333726	-0.00771019	-0.11269	-0.0494856
GOLI4_HUMAN	-0.110469	0.164156	0.30798	-0.0630739	0.174246	0.143742	0.0568877	-0.0580221
GOLP3_HUMAN	NA	NA	NA	NA	NA	NA	NA	NA
GOPC_HUMAN	-0.0495307	-0.0110654	-0.180901	0.0117919	0.0107357	0.168947	-0.0484786	-0.0107846
GORS2_HUMAN	0.0643098	-0.0317324	0.183974	-0.0251383	-0.261138	-0.0321834	0.00408631	0.0782153
GOSR1_HUMAN	-0.130703	0.0734466	0.018499	0.156231	0.453533	-0.323475	-0.154694	0.111676
GOSR2_HUMAN	-0.565156	-0.122216	-0.164062	0.0133699	-0.0748737	0.178176	0.0716046	0.237527
GP1BA_HUMAN	0.263967	0.247753	-0.235869	-0.25855	1.89477	-0.280893	0.0585024	-0.5043
GP1BB_HUMAN	-0.409551	0.79811	0.174209	-0.544145	1.48678	0.140201	-0.43808	-0.447997
GPAT1_HUMAN	0.0728175	0.00874845	-0.126399	-0.0856525	0.000842833	0.0263483	0.202719	0.0196946
GPAT3_HUMAN	0.000827368	0.00558075	-0.134501	0.0959196	-0.145343	0.0104245	0.00376587	0.0562884
GPC1_HUMAN	0.0229482	-0.0212997	-0.178233	-0.0107655	-0.237994	0.0235995	-0.00637558	0.1221
GPC4_HUMAN	0.0486399	-0.0309053	-0.0369134	0.218847	0.0309053	-0.034257	0.00360388	-0.0732199
GPC5B_HUMAN	-0.0112147	0.038163	-0.00111476	-0.0178928	0.0112147	0.0134068	-0.0183475	0.00111476
GPCP1_HUMAN	0.263826	-0.0166818	0.464746	-0.0275719	0.010652	-0.0563401	-0.14513	-0.0422331
GPD1L_HUMAN	0.108226	-0.119343	0.0104929	0.0618654	-0.125079	-0.113482	-0.0639852	0.0669297
GPDA_HUMAN	0.00897649	-0.0353399	0.0822604	0.0752336	-0.238916	0.0362337	-0.0012947	-0.0723074
GPDM_HUMAN	0.0972408	-0.0462281	-0.163368	0.0467852	0.0301185	0.0383543	0.0287159	-0.0339523
GPHRA_HUMAN	-0.0753045	0.0340987	-0.00426427	0.0274613	-0.20475	0.0173047	0.00377825	0.0434292
GPI8_HUMAN	0.016244	0.0450078	-0.0265149	-0.00286395	-0.00012602	0.0526679	-0.00147983	-0.00590071
GPKOW_HUMAN	-0.0438461	-0.00599691	0.0460013	-0.0130192	-0.155318	0.218721	-0.428044	0.0290975
GPN3_HUMAN	0.089046	-0.0175046	-0.126179	0.207314	0.134879	0.0361505	-0.043942	0.13997
GPNMB_HUMAN	0.0447949	-0.0851953	0.257572	0.286207	-0.0447949	0.0758373	-0.408538	-0.14663
GPTC8_HUMAN	-0.00385448	0.132855	-0.0308091	0.112578	0.0366901	0.00167128	0.0308091	0.00385448
GPV_HUMAN	-1.03431	0.350601	0.0466009	-0.392533	0.273943	0.478921	-0.391363	0.108865
GPVI_HUMAN	NA	NA	NA	NA	NA	NA	NA	NA
GPX1_HUMAN	0.108183	-0.0900312	0.0456344	-0.089458	0.109276	0.0035055	-0.0403744	0.000264565
GPX3_HUMAN	0.139576	-0.0679437	-0.103885	0.0305774	0.20763	0.0605439	-0.0574783	-0.0269914
GPX4_HUMAN	0.00444556	0.208819	-0.0308866	0.0603783	-0.328472	0.113416	-0.0480452	0.0190383
GPX7_HUMAN	0.0391238	-0.0313344	0.00379748	0.0749292	0.116607	-0.076747	0.101693	-0.0562377
GRAN_HUMAN	0.283668	0.339014	-0.200955	-0.176158	1.40506	-0.133654	0.0574353	-0.329477
GRAP1_HUMAN	-0.408231	-0.108001	0.0964362	-0.0804921	0.0660464	0.442031	0.0784038	-0.109527
GRB2_HUMAN	0.0304159	-0.0695477	-0.058466	-0.0856252	-0.00152022	0.147171	-0.0828125	0.110353
GRDN_HUMAN	NA	NA	NA	NA	NA	NA	NA	NA
GRHPR_HUMAN	-0.0271511	-0.13244	0.19094	0.0330784	-0.273746	-0.0373451	-0.0625505	0.0617288
GRIP2_HUMAN	-0.00502495	-0.0446031	0.0164023	-0.0670065	-0.0702205	-0.185175	0.00502495	0.259852
GRK6_HUMAN	NA	NA	NA	NA	NA	NA	NA	NA
GRP2_HUMAN	0.412218	-0.0360438	-0.00606852	-0.027308	0.30009	0.307289	0.00606852	-0.129982
GRP75_HUMAN	-0.0047829	-0.221163	0.103887	0.13002	-0.261277	-0.107207	0.0507383	0.0449057
GRP78_HUMAN	NA	NA	NA	NA	NA	NA	NA	NA
GRPE1_HUMAN	0.0183199	-0.150993	0.106888	0.374733	-0.214046	-0.381241	0.144485	0.0346459
GRSF1_HUMAN	0.0432769	-0.0907426	0.325224	-0.0184774	-0.342014	-0.0395557	0.0560773	-0.0585059
GRWD1_HUMAN	-0.083022	0.0192109	-0.101148	0.0770596	0.018554	0.0307724	-0.00395077	0.0161359
GSDME_HUMAN	NA	NA	NA	NA	NA	NA	NA	NA
GSH0_HUMAN	0.0478012	0.026398	-0.0408548	0.0138743	0.407466	0.0392555	-0.0286651	-0.238948
GSH1_HUMAN	0.295176	0.117782	-0.335727	-0.263934	0.705306	0.0121644	-0.0266118	-0.207128
GSHB_HUMAN	0.0535855	-0.0336454	-0.0345591	-0.0166178	0.00712552	0.0150896	0.00831781	0.050814
GSHR_HUMAN	0.0408766	0.00859318	0.000245247	-0.0816267	-0.0432618	0.0703365	-0.0782086	0.0516492
GSK3A_HUMAN	0.0848469	0.0899482	-0.152576	0.0695854	-0.1149	0.0267567	-0.0109911	0.0359738
GSK3B_HUMAN	0.00625883	0.00491186	0.0633794	0.102311	-0.220629	0.105025	-0.00625883	-0.102617
GSLG1_HUMAN	-0.0269024	0.239187	-0.0997901	-0.0245067	0.0209138	0.268484	-0.0154108	0.0196493
GST2_HUMAN	NA	NA	NA	NA	NA	NA	NA	NA
GSTK1_HUMAN	-0.0934948	-0.105619	0.395911	0.123859	-0.308534	-0.0731156	0.0811572	0.0284633
GSTM1_HUMAN	-0.262636	1.1115	0.210111	-0.358718	1.06843	-0.0220408	-0.139135	1.00784
GSTM2_HUMAN	0.0772495	-0.0983816	0.0859871	-0.065379	0.0932894	-0.0329312	-0.348197	0.265713
GSTM3_HUMAN	0.600083	-0.0452141	-0.0907744	-0.241652	-0.307776	0.0983472	0.147919	0.0955516
GSTM4_HUMAN	-0.034527	0.05711	-0.0738656	1.16769	0.143959	-0.007842	-0.302964	0.0867374
GSTO1_HUMAN	0.162256	-0.0583981	0.15013	-0.305997	-0.429688	-0.266357	-0.119695	0.0532867
GSTP1_HUMAN	0.0956085	-0.0363795	-0.110238	0.000340155	-0.131221	0.0558792	-0.035439	0.197418
GSTT1_HUMAN	0.138074	-0.782004	0.000761496	-0.00736094	-0.731767	-0.0264316	-0.170446	0.426025
GTF2I_HUMAN	-0.0394793	0.0617983	0.00981218	-0.00466777	-0.0138347	0.261527	0.00221156	-0.0113232
GTPB1_HUMAN	-0.156686	0.0227198	-0.0937682	0.0527408	0.030141	0.00913981	-0.144118	0.0713468
GTPB3_HUMAN	0.250698	0.032215	-0.204957	0.0326745	0.165293	-0.118532	0.135894	-0.173625
GTPB6_HUMAN	-0.325048	-0.0620179	0.0397455	-0.0684471	0.0567135	-0.147967	-0.0123242	0.0123242
GTPB8_HUMAN	NA	NA	NA	NA	NA	NA	NA	NA
GTPBA_HUMAN	-0.202036	-0.0271848	0.123379	0.0581004	0.277917	-0.267459	0.387715	0.0105922
GTR1_HUMAN	0.557694	0.282549	-0.523346	-0.171177	1.82625	-0.314024	0.219278	-0.894821
GTR4_HUMAN	-0.03636	0.133691	0.185348	-0.110968	-0.183278	-0.180598	-0.0115386	-0.00969804
GTR5_HUMAN	-0.187949	0.49361	0.230871	0.0716081	-0.561482	0.252053	0.185994	-0.0749882
GUAA_HUMAN	0.00206791	0.0217519	0.0281994	0.0230229	-0.0544861	-0.00816124	-0.00868741	-0.00159644
GUAD_HUMAN	-0.428643	-0.00891032	0.164249	-0.420892	-0.142539	1.21501	0.540869	0.745861
GUF1_HUMAN	0.221711	-0.0394627	0.185794	0.167435	-0.412892	-0.119358	0.00779594	-0.151425
GYS1_HUMAN	-0.0730788	-0.0589285	0.101922	0.165476	-0.206738	-0.0940687	-0.00259735	0.0393799
H10_HUMAN	-0.011631	0.117019	-0.148182	0.0109962	0.107672	0.107031	-0.00546251	0.0894505
H15_HUMAN	0.142824	0.197246	-0.0194955	-0.182892	1.52393	-0.176797	0.0738908	-0.245822
H1BP3_HUMAN	0.129415	0.09315	-0.221408	0.0382624	0.0196492	-0.0382624	-0.267462	-0.0858484
H1X_HUMAN	-0.0176524	0.130924	-0.183806	-0.0370199	0.288803	0.024388	-0.078883	0.114607
H2A2A_HUMAN	NA	NA	NA	NA	NA	NA	NA	NA
H2AW_HUMAN	-0.00570328	-0.158136	-0.00164981	0.0172605	-0.15352	0.100606	-0.0524835	0.128768
H2AX_HUMAN	NA	NA	NA	NA	NA	NA	NA	NA
H2AY_HUMAN	-0.0434753	0.0296736	-0.193261	0.0929383	0.038602	0.0395862	0.0750188	0.117987
H2AZ_HUMAN	NA	NA	NA	NA	NA	NA	NA	NA
H2B2C_HUMAN	NA	NA	NA	NA	NA	NA	NA	NA
H2B2F_HUMAN	NA	NA	NA	NA	NA	NA	NA	NA
H31_HUMAN	NA	NA	NA	NA	NA	NA	NA	NA
H32_HUMAN	NA	NA	NA	NA	NA	NA	NA	NA
H33_HUMAN	-0.244962	0.0213354	-0.413327	0.155698	0.0260695	0.104747	-0.0237608	0.13516
H4_HUMAN	-0.0802658	0.260024	-0.456486	0.103366	0.0616269	0.0678456	0.00711821	0.151208
H90B3_HUMAN	0.0414585	0.00286502	-0.0741519	-0.0302287	-0.0489949	0.246089	0.0617972	0.215429
HABP2_HUMAN	0.392735	0.490588	-0.266817	-0.0055364	0.153963	-0.222552	-0.208007	-0.15593
HACD1_HUMAN	0.0691987	0.0126738	0.0209551	-0.0433403	-0.0771953	0.108545	0.0441293	-0.140639
HACD3_HUMAN	-0.0655973	0.034793	-0.0781152	-0.0732814	0.0649166	-0.00400066	0.00591977	0.0182656
HACD4_HUMAN	NA	NA	NA	NA	NA	NA	NA	NA
HAKAI_HUMAN	NA	NA	NA	NA	NA	NA	NA	NA
HAP28_HUMAN	0.0980881	-0.00803997	0.0166846	-0.0245423	-0.149168	0.0650797	-0.000524028	0.11382
HAT1_HUMAN	0.0164422	0.262102	0.0302129	0.186586	0.116926	0.023131	-0.0701139	-0.130961
HAX1_HUMAN	0.0358717	0.0224907	0.0808961	0.0915288	0.339833	-0.152725	-0.0941242	-0.186997
HBS1L_HUMAN	-0.0240242	-0.0154798	0.027973	0.0198508	-0.0292101	0.0187332	0.0303566	0.10896
HCD2_HUMAN	-0.0342758	-0.166827	0.111081	0.0618844	-0.283662	-0.0996197	0.0665369	0.0726108
HCDH_HUMAN	-0.135169	-0.194679	0.00803853	0.190391	-0.223682	-0.093893	0.00206842	0.111584
HCFC1_HUMAN	-0.000334108	0.104683	-0.113111	-0.0567841	-0.0227443	-0.0724673	0.009944	0.173165
HCLS1_HUMAN	0.0551487	0.0487253	0.00127095	-0.236553	0.146975	0.204171	-0.00127095	-0.21499
HD_HUMAN	-0.229164	-0.00206619	0.0475272	-0.0673867	0.0673867	-5.7e-05	-0.0475272	-0.0886762
HDAC2_HUMAN	-0.10695	0.400546	-0.016025	0.142444	0.080527	0.0191129	-0.0502769	-0.0221949
HDAC3_HUMAN	-0.345415	0.218491	0.465382	-0.113449	0.568137	-0.36426	-0.480291	0.113449
HDAC6_HUMAN	-0.514248	-0.00489586	-0.0810736	0.254068	0.0106605	0.0424119	-0.0846015	-0.104283
HDC_HUMAN	NA	NA	NA	NA	NA	NA	NA	NA
HDDC2_HUMAN	-0.00481904	-0.0242513	0.0636337	0.0574827	-0.0222199	0.024087	-0.106908	0.00632395
HDGF_HUMAN	0.00698114	0.0142393	-0.0734297	0.0193206	0.00518041	0.0664241	-0.0592894	0.0366846
HDGL1_HUMAN	NA	NA	NA	NA	NA	NA	NA	NA
HDGR2_HUMAN	-0.231229	0.0501976	0.0129423	0.0197978	-0.18548	0.0457608	0.00208375	0.0977147
HDGR3_HUMAN	0.0896418	0.287708	-0.206172	0.271142	1.24557	-0.133151	-0.0777142	-0.0590718
HDHD1_HUMAN	0.390181	-0.0143302	-0.163672	0.264912	-0.00981107	-0.229025	-0.169953	0.065366
HDHD2_HUMAN	-0.00556782	-0.123008	-0.0791924	0.00451789	-0.0985725	0.034926	-0.104741	0.0226896
HDHD3_HUMAN	0.0184987	0.101646	0.291164	0.165154	-0.361666	-0.499298	0.210674	-0.0184987
HDHD5_HUMAN	-0.0400598	-0.222592	0.215346	0.138354	-0.421405	-0.301047	-0.0188199	0.0633318
HEAT3_HUMAN	-0.0955184	0.00400038	-0.00400038	0.0234544	-0.257796	0.204193	0.0225439	-0.0334278
HEBP1_HUMAN	0.0856918	-0.0138659	-0.0232672	0.00540985	0.419803	0.0121355	-0.0279524	-0.201043
HEBP2_HUMAN	0.134522	0.00332508	-0.0789229	-0.126921	-0.0585381	0.130052	-0.113393	0.0339351
HECD1_HUMAN	0.107042	-0.0215612	0.00250846	-0.0112085	-0.0923124	-0.0127301	-0.0138202	0.0064024
HECD3_HUMAN	0.0195069	0.0229129	-0.0124972	-0.0255705	0.0588118	-0.0258542	0.0227535	-0.0815693
HELZ_HUMAN	-0.215153	-0.171892	0.0813606	0.106733	-0.043444	-0.146622	-0.25076	0.373582
HEM1_HUMAN	NA	NA	NA	NA	NA	NA	NA	NA
HEM2_HUMAN	0.42046	-0.080243	-0.165007	-0.211191	0.530875	0.00689153	0.00201652	-0.205391
HEM3_HUMAN	0.0941004	-0.0761902	-0.0105691	-0.0623199	0.414017	-0.0941462	-0.00622748	-0.151868
HEM4_HUMAN	0.0967283	0.00925327	-0.00912829	-0.116883	0.270694	-0.0156271	0.00193529	-0.139688
HEM6_HUMAN	-0.104558	-0.129783	0.291227	0.0495604	-0.386024	-0.027311	0.150158	0.0133185
HEMH_HUMAN	0.0440002	-0.0600859	-0.0276054	0.277821	-0.119171	-0.0260471	0.0354149	-0.0841891
HEMK2_HUMAN	0.166047	0.176492	-0.0124925	0.0124925	0.449874	-0.0544925	-0.074443	0.0291821
HEMO_HUMAN	0.415538	0.0705862	-0.277603	-0.087291	-0.119715	0.108188	-0.106576	-0.0570478
HEP2_HUMAN	0.373708	0.282634	-0.325795	-0.270862	0.514408	-0.00171358	-0.0786391	-0.24018
HERC1_HUMAN	0.0613756	0.00843335	0.0262939	0.0439609	-0.0735067	-0.0179052	0.00332749	0.0716646
HERC2_HUMAN	NA	NA	NA	NA	NA	NA	NA	NA
HERC4_HUMAN	0.00434479	0.0827358	-0.0029444	0.0936043	-0.0264354	0.00944272	0.011099	-0.0301474
HEXA_HUMAN	0.134353	-0.0247703	-0.0236973	0.0236973	-0.148395	-0.0725833	-0.188392	0.0509863
HEXB_HUMAN	0.0794979	-0.11251	0.162006	0.0370047	-0.00028263	-0.0723943	-0.173679	-0.00778108
HEXDC_HUMAN	0.084828	-0.0453891	-0.164516	0.226408	-0.135728	0.0130066	-0.0130066	0.201058
HG2A_HUMAN	0.0726314	0.0496738	-0.0774285	0.333304	0.0778012	-0.281463	-0.105149	0.243032
HGFA_HUMAN	0.36077	0.677153	-0.212478	-0.16736	0.156982	-0.0617075	0.120286	0.0299607
HGH1_HUMAN	-0.06218	-0.00964095	0.020183	-0.0248444	-0.00520041	0.0480226	-0.0451904	0.150565
HGS_HUMAN	0.0956132	0.0202334	-0.063879	-0.165959	0.168771	0.118076	-0.00420641	-0.0792985
HHATL_HUMAN	-0.0507737	-0.0715034	0.433954	0.128894	-0.110234	0.161422	0.0325423	-0.0945584
HIBCH_HUMAN	-0.367375	-0.110375	-0.0168337	0.176927	-0.0658331	-0.597123	-0.0228811	0.112615
HIF1N_HUMAN	-0.0237468	-0.162677	0.069141	-0.0513309	0.0513309	0.222521	0.073761	-0.0165636
HIG1A_HUMAN	NA	NA	NA	NA	NA	NA	NA	NA
HIG2A_HUMAN	-0.416393	0.0650006	-0.548696	0.528687	0.229577	0.278541	0.197111	-0.0773108
HIKES_HUMAN	-0.109974	-0.0348159	0.122556	0.11015	-0.0323449	0.0549899	-0.202039	-0.0546387
HINT1_HUMAN	0.0522772	-0.0900598	0.0837635	0.000737554	-0.0780767	0.0922926	-0.11349	0.00182732
HINT2_HUMAN	-0.0836816	-0.278359	0.286467	0.0495861	-0.17916	-0.20893	0.0694665	0.0138091
HINT3_HUMAN	0.00116227	-0.0558583	0.0736972	0.0608717	-0.209232	0.0749448	0.0529248	-0.0600914
HIP1_HUMAN	0.0572765	0.0731914	0.343442	0.245412	-0.259386	-0.0702354	-0.235062	0.273902
HM13_HUMAN	0.145919	0.310858	0.0477894	-0.229029	0.0755893	-0.167967	-0.012735	-0.209571
HMCN1_HUMAN	NA	NA	NA	NA	NA	NA	NA	NA
HMCN2_HUMAN	-0.101029	0.0267193	0.0235235	0.00145458	0.0633347	0.141552	0.00425521	0.071693
HMCS2_HUMAN	-0.291108	0.0924448	-0.471701	-0.343004	0.702368	-0.296053	-0.28786	1.43633
HMGA1_HUMAN	-0.0121432	-0.0233382	-0.0663705	-0.0737327	-0.00402825	0.0298282	0.0139555	0.302911
HMGB1_HUMAN	0.0172807	0.104369	-0.193478	0.022699	-0.0373716	0.166404	-0.0404584	0.240915
HMGB2_HUMAN	-0.0143423	0.0143423	-0.13106	-0.0974864	0.33906	-0.0179784	0.0179784	0.161722
HMGCL_HUMAN	-0.0142979	-0.280391	0.0618686	0.216294	-0.316903	-0.208156	0.0193739	0.0789058
HMGN5_HUMAN	-0.0031972	0.0834727	-0.0822903	0.0031972	0.234727	-0.0563659	0.167564	-0.22703
HMHA1_HUMAN	NA	NA	NA	NA	NA	NA	NA	NA
HMOX1_HUMAN	-0.070137	0.0168905	-0.170206	0.234243	0.0124767	0.111591	0.0425234	-0.0449183
HMOX2_HUMAN	0.0740004	-0.0062767	0.0287342	0.00198667	-0.0162077	-0.144563	-0.0847224	-0.0777225
HNMT_HUMAN	-0.0423624	0.364246	0.093075	-0.418545	0.00343953	0.257435	0.0475715	-0.263208
HNRDL_HUMAN	-0.0162242	0.00725233	-0.136994	0.0861695	-0.0333051	0.121365	0.00429295	0.0303714
HNRH1_HUMAN	-0.033398	-0.0139214	0.0921656	0.0655227	-0.132908	0.0258825	-0.077082	0.0891223
HNRH2_HUMAN	-0.00656538	9.34e-05	0.00959668	-0.000289683	0.000289683	0.0257778	-0.0400749	0.188267
HNRH3_HUMAN	-0.0459877	-0.00330169	-0.033193	-0.0145067	-0.0188304	0.0800136	-0.0138329	0.10288
[truncated: 4,178 more rows]

## Sheet: MA-NA_BatchNormalizedTMT_3
TMT Batch3- batch normalized log2 protein intensities
Protein Name	MasterAlthlete	MasterAlthlete	MasterAlthlete	MasterAlthlete	NonAthlete	NonAthlete	NonAthlete	NonAthlete
Group	MasterAlthlete	MasterAlthlete	MasterAlthlete	MasterAlthlete	Control	Control	Control	Control
1433B_HUMAN	0.105575	0.0189854	0.0508744	-0.0826627	-0.0169799	-0.141387	-0.0639265	-0.0125023
1433E_HUMAN	0.142164	0.022493	-0.03536	-0.024343	0.00855521	-0.0316637	-0.0698887	-0.0396254
1433F_HUMAN	0.15519	0.0352846	0.0374784	-0.113064	0.104725	-0.0408172	-0.01342	-0.0443797
1433G_HUMAN	0.155542	0.0222593	-0.172184	-0.0741201	-0.0374511	0.0378912	-0.0537526	0.00603248
1433T_HUMAN	0.0497957	0.0110121	0.154477	-0.278532	0.0863261	-0.0113378	-0.231598	0.0552405
1433Z_HUMAN	0.112006	-0.149631	0.255805	-0.136315	0.0776453	-0.0468499	-0.0719042	0.0847759
1A02_HUMAN	0.835493	0.0606815	-0.117418	1.00077	-0.327417	0.322096	-0.32562	-0.320365
1A03_HUMAN	NA	NA	NA	NA	NA	NA	NA	NA
2A5A_HUMAN	0.238044	-0.000147309	-0.1024	-0.155826	-0.216646	-0.0201598	0.0847905	-0.0191921
2A5D_HUMAN	-0.0351661	-0.0410227	-0.131546	-0.0207994	-0.0373539	0.0509486	0.0163228	0.0400497
2A5E_HUMAN	0.0391168	-0.003746	-0.107955	-0.0144646	-0.106473	0.0828644	-0.0389366	0.00926616
2A5G_HUMAN	0.120589	0.189502	-0.0435484	-0.0902609	0.0435484	0.329614	-0.150448	0.0902609
2AAA_HUMAN	0.0817408	-0.0526343	-0.0482044	-0.0946756	0.059697	0.0609535	-0.0464469	0.0535663
2AAB_HUMAN	NA	NA	NA	NA	NA	NA	NA	NA
2ABA_HUMAN	0.163909	-0.125509	-0.243078	-0.0591077	0.0659972	-0.00588795	-0.0909585	0.188288
2B14_HUMAN	1.81958	-0.162971	-0.0256998	1.96405	-0.37053	0.0592107	-0.0358206	1.49887
2B17_HUMAN	NA	NA	NA	NA	NA	NA	NA	NA
3BP5L_HUMAN	NA	NA	NA	NA	NA	NA	NA	NA
3HIDH_HUMAN	-0.00477455	0.284182	-0.100264	0.052659	-0.179987	-0.106892	0.00813631	-0.104217
3MG_HUMAN	NA	NA	NA	NA	NA	NA	NA	NA
41_HUMAN	0.109662	-0.0813877	1.10768	-0.0861942	1.20659	-0.0103025	-0.283901	0.288004
4EBP2_HUMAN	NA	NA	NA	NA	NA	NA	NA	NA
4ET_HUMAN	0.0302941	0.0577771	0.206332	-0.693275	0.479133	0.0139387	-0.0671017	-0.0139387
5NT1A_HUMAN	-0.0475476	-0.224924	-0.235119	-0.0870216	-0.116569	0.297597	0.276963	0.351281
5NT3A_HUMAN	0.116463	0.0171852	-0.187775	-0.0431936	0.00056001	-0.0839849	-0.039281	-0.110263
5NT3B_HUMAN	NA	NA	NA	NA	NA	NA	NA	NA
5NTC_HUMAN	0.384953	0.0295834	-0.199172	0.0289138	-0.262211	-0.146049	-0.109159	0.176333
5NTD_HUMAN	-0.248041	0.08947	0.319783	-0.246853	0.0537842	0.185013	-0.122203	0.481423
6PGD_HUMAN	-0.0290116	-0.168314	0.496279	0.0136328	0.628283	0.0435099	-0.374048	0.156945
6PGL_HUMAN	0.135867	-0.0824687	0.0862054	-0.209447	0.341689	0.0161255	-0.232162	0.133153
8ODP_HUMAN	NA	NA	NA	NA	NA	NA	NA	NA
A16A1_HUMAN	-0.016215	-0.0148875	0.326829	-0.11261	0.255594	0.186599	-0.15155	0.0555246
A16L1_HUMAN	0.186947	0.0361776	-0.0305916	0.0575633	-0.0575633	0.0418395	0.00876767	-0.00876767
A1AG1_HUMAN	0.123326	-0.268804	-0.112327	-0.515238	1.73715	0.254081	-0.553164	0.632977
A1AG2_HUMAN	0.01664	-0.0497425	0.104426	-0.0636793	1.25654	-0.0772399	-0.368729	0.299221
A1AT_HUMAN	0.188889	-0.0225478	-0.158716	-0.319696	1.45641	0.250292	-0.402432	0.499462
A1BG_HUMAN	0.0786084	-0.0159791	-0.0687224	-0.166834	0.610597	0.212085	-0.147238	0.350114
A2AP_HUMAN	0.120119	-0.101043	0.770978	-0.194792	1.11257	0.137444	-0.657831	0.0680873
A2GL_HUMAN	0.181794	-0.144736	0.065523	-0.201047	1.13702	0.0770082	-0.20361	0.346812
A2MG_HUMAN	0.235669	0.136199	-0.149739	-0.26464	1.1563	0.346953	-0.475204	0.24889
AAAS_HUMAN	-0.0421135	0.0710327	-0.162453	-0.141581	0.164969	0.0921366	0.0040219	-0.00681476
AACT_HUMAN	0.106389	0.0380095	-0.0459931	-0.359869	1.21937	0.17652	-0.487682	0.27145
AAK1_HUMAN	0.193863	-0.0599686	0.424139	-0.0723206	0.471161	0.00620175	-0.130204	0.18751
AAKB1_HUMAN	NA	NA	NA	NA	NA	NA	NA	NA
AAKB2_HUMAN	0.0437138	0.0650991	-0.0887599	-0.208529	-0.0465317	-0.0531759	0.152688	-0.00676604
AAKG1_HUMAN	0.097437	0.104413	-0.0565716	0.000306396	-0.0565446	-0.121524	-0.00200995	-0.0107925
AAKG2_HUMAN	0.0760231	0.360767	0.0263361	0.130146	-0.0786386	-0.289285	-0.327305	-0.241685
AAKG3_HUMAN	-0.321854	-0.0259013	-0.0967147	-0.214465	0.19771	0.262278	0.27279	0.162707
AAMDC_HUMAN	0.146492	-0.205792	-0.19543	0.0248377	0.033925	0.222164	-0.110314	0.025362
AAPK1_HUMAN	-0.305406	0.303077	0.108877	-0.0265931	0.0398354	0.0242181	-0.149585	0.157104
AAPK2_HUMAN	0.0803012	0.158063	-0.0582289	-0.0994297	-0.0693211	-0.0856645	0.0127032	-0.0138751
AAR2_HUMAN	-0.193773	0.0881532	-0.304802	-0.0672841	-0.131057	0.16272	0.0536435	0.0499069
AASD1_HUMAN	0.159165	0.0493337	-0.0582853	-0.138713	-0.0801289	-0.0564511	-0.0402844	0.00292134
AASS_HUMAN	0.059486	0.0434533	0.133223	0.151163	-0.240118	-0.286861	-0.024922	-0.133354
AATC_HUMAN	0.0269148	0.282625	-0.261559	0.0184439	-0.0806243	-0.0213961	-0.180371	-0.111256
AATF_HUMAN	NA	NA	NA	NA	NA	NA	NA	NA
AATM_HUMAN	-0.00757248	0.383743	-0.11333	0.166648	-0.205477	-0.290274	0.03457	-0.199223
ABCA5_HUMAN	0.0106576	0.010008	0.0088519	-0.125586	-0.0640413	-0.0929769	0.0291115	-0.0888854
ABCA6_HUMAN	NA	NA	NA	NA	NA	NA	NA	NA
ABCA8_HUMAN	-0.0256952	0.0149783	0.0258129	-0.140022	-0.0742091	-0.148543	-0.0504817	0.19956
ABCB6_HUMAN	-0.124721	-0.278955	0.0569806	-0.142719	0.274224	0.00912449	-0.0154424	0.0685497
ABCB7_HUMAN	-0.0529882	0.141658	-0.026772	0.0963255	0.046699	-0.354485	0.0229818	-0.113283
ABCB8_HUMAN	0.110175	0.0317424	0.0136096	0.315759	-0.161303	-0.481712	-0.147061	-0.068703
ABCBA_HUMAN	-0.117484	0.000900013	-0.146829	0.188748	-0.197848	-0.0412402	0.132627	0.0265911
ABCBB_HUMAN	NA	NA	NA	NA	NA	NA	NA	NA
ABCC9_HUMAN	0.0744627	0.00403742	-0.00497758	0.0381146	-0.309606	-0.0174036	0.179087	-0.167855
ABCD1_HUMAN	-0.000890006	-0.0654814	-0.0639806	0.0312505	-0.165196	0.243988	0.0736856	-0.321715
ABCD3_HUMAN	0.0382397	0.0533524	-0.0223992	-0.0305451	0.0320728	-0.055102	-0.0579474	-0.0788858
ABCE1_HUMAN	0.0973972	0.0290272	-0.0855576	-0.0677167	0.0142495	0.00582857	-0.0355877	-0.119911
ABCF1_HUMAN	0.0860163	-0.012235	-0.0833156	-0.0814985	-0.189771	0.0227073	0.0111626	-0.082554
ABCF2_HUMAN	0.0866674	-0.00571513	-0.00331317	-0.0499372	0.019054	0.0119209	-0.000717607	-0.0750501
ABCF3_HUMAN	0.0322504	-0.0243093	-0.132431	-0.00645816	-0.134773	0.108779	0.0749451	-0.0323839
ABD12_HUMAN	-0.184006	-0.0257558	-0.0860836	0.0953581	0.531866	0.0257558	-0.0901022	0.327016
ABEC2_HUMAN	-0.0109789	-0.0928297	-0.240329	-0.0312425	0.00819182	0.333742	0.149965	-0.02457
ABHD4_HUMAN	NA	NA	NA	NA	NA	NA	NA	NA
ABHD5_HUMAN	0.124115	-0.0418215	-0.0139549	-0.0420839	-0.0238402	0.0610977	-0.038756	0.0924053
ABHDA_HUMAN	-0.0142979	0.0525566	0.000473819	0.180878	-0.382719	-0.270627	0.0026034	-0.293448
ABHDB_HUMAN	-0.0163802	0.247529	-0.123137	0.146809	-0.213417	-0.0272922	0.0380159	-0.108415
ABHEB_HUMAN	0.000932672	-0.079119	-0.0130681	-0.188657	0.303433	0.0819533	-0.202095	0.0994296
ABHGA_HUMAN	0.0298355	0.145388	0.0261753	0.121532	-0.15578	-0.0109313	-0.0273105	-0.142759
ABI1_HUMAN	NA	NA	NA	NA	NA	NA	NA	NA
ABI3_HUMAN	-0.0207104	-0.175594	-0.175071	0.0207104	0.127576	0.0548928	0.0853738	-0.0706066
ABL1_HUMAN	NA	NA	NA	NA	NA	NA	NA	NA
ABLM1_HUMAN	1.13551	-0.416728	0.0759717	-0.223496	0.313822	-0.300289	-0.16428	0.410403
ABLM2_HUMAN	-0.000833622	-0.0167955	-0.0338668	-0.0167222	-0.165432	0.0363389	0.108485	-0.0186132
ABLM3_HUMAN	0.0402045	0.0601455	-0.0577206	-0.0116115	-0.323955	0.0821237	0.00832278	-0.0857993
ABR_HUMAN	NA	NA	NA	NA	NA	NA	NA	NA
ABRA_HUMAN	0.00849938	-0.111202	-0.00616127	-0.0620452	-0.0193591	0.00601396	0.0186543	0.155818
ABRX2_HUMAN	0.0806795	0.0201227	-0.182674	-0.101345	-0.0415496	0.031974	0.053001	-0.102147
ABTB2_HUMAN	-0.304936	-0.184355	0.533587	0.0523603	0.290727	-0.151023	0.0738873	0.0493484
ACACB_HUMAN	-0.0609664	0.00347088	-0.13382	-0.0844712	0.00967885	0.0743691	0.0287151	0.0493368
ACAD8_HUMAN	-0.00288848	0.10156	-0.0759018	0.1748	-0.246746	-0.211322	0.0714875	-0.195698
ACAD9_HUMAN	0.04275	0.168712	-0.0260469	0.15903	-0.549266	-0.266218	0.187235	-0.117382
ACADL_HUMAN	NA	NA	NA	NA	NA	NA	NA	NA
ACADM_HUMAN	-0.0192815	0.42539	-0.133854	-0.0553236	-0.223606	-0.0217071	0.0545745	0.00395932
ACADS_HUMAN	-0.103193	0.0727189	-0.152342	0.25407	-0.0282943	-0.187256	0.0988369	0.00172676
ACADV_HUMAN	0.0204489	0.237247	-0.0453103	0.280616	-0.135912	-0.289322	-0.0297141	-0.0768736
ACAP2_HUMAN	-0.107168	-0.147007	0.911023	-0.0531324	0.246979	-0.0910984	-0.0940194	0.17694
ACBD5_HUMAN	0.158389	0.00792465	0.126739	-0.208922	0.201158	-0.052682	0.160784	-0.278293
ACBD6_HUMAN	NA	NA	NA	NA	NA	NA	NA	NA
ACBP_HUMAN	0.0960494	-0.0591138	-0.320746	-0.132808	0.0508838	0.380342	-0.0249315	0.239508
ACD10_HUMAN	-0.133063	-0.0150399	-0.192373	0.0150399	-0.352649	0.188994	-0.167929	-0.162161
ACDSB_HUMAN	0.219768	0.260573	-0.0346164	0.0804664	-0.337546	-0.338188	0.0898088	-0.155402
ACE_HUMAN	-0.276043	0.00978542	-0.316917	0.0885982	-0.101815	0.282252	0.0329195	0.00580118
ACES_HUMAN	0.00539015	0.0645609	-0.00539015	0.105554	-0.0322573	0.151339	-0.0542259	-0.100819
ACINU_HUMAN	0.0167012	-0.0135738	-0.169942	-0.0815724	-0.0119257	0.0992589	0.0383589	-0.000116629
ACL6A_HUMAN	-0.0726118	0.00617364	-0.00937971	-0.0137633	0.122501	0.00937971	-0.0936505	0.0137633
ACLY_HUMAN	0.0531677	-0.00166694	1.05323	-0.156672	1.06301	0.00507151	-0.237098	0.43387
ACO11_HUMAN	0.37618	0.470274	0.316118	-0.284159	0.153516	-0.445267	-0.266547	-0.0615246
ACO13_HUMAN	0.0251863	0.100613	-0.0184184	0.147665	-0.125206	0.00315249	-0.00733688	-0.115702
ACOC_HUMAN	0.171032	-0.0229279	-0.0409939	-0.0248487	-0.0211145	0.0146967	-0.165297	0.0499097
ACON_HUMAN	-0.0103847	0.248682	-0.0500536	0.118675	-0.229829	-0.188108	0.0190134	-0.166306
ACOT1_HUMAN	0.0905261	0.0586617	-0.0799738	0.0993564	-0.302531	-0.318992	0.152025	-0.194473
ACOT2_HUMAN	-0.151637	0.25568	-0.0579234	0.365026	-0.292927	-0.587161	-0.127843	0.178904
ACOT8_HUMAN	-0.0724823	-0.0826672	-0.105195	0.00528914	-0.286769	0.0157139	0.126879	-0.0134539
ACOT9_HUMAN	0.144624	0.0832123	-0.0911315	-0.0190652	-0.141859	0.000983761	0.0115494	-0.0185962
ACOX1_HUMAN	-0.0652179	0.0366667	0.154184	-0.110791	-0.202094	0.126667	-0.162152	-0.0142391
ACOX2_HUMAN	NA	NA	NA	NA	NA	NA	NA	NA
ACOX3_HUMAN	NA	NA	NA	NA	NA	NA	NA	NA
ACPH_HUMAN	0.0535062	-0.0392626	0.0983227	-0.109947	0.231333	-0.0185252	-0.111308	0.00372057
ACPM_HUMAN	0.0188214	0.218727	0.0398688	0.156881	-0.0300808	-0.132188	-0.203695	-0.237264
ACS2L_HUMAN	0.50101	0.0279843	0.0257811	0.0190975	-0.0549775	-0.166652	-0.250032	-0.118863
ACSA_HUMAN	-0.0314702	0.0147895	-0.010236	-0.129243	-0.0806177	0.173435	-0.0333477	0.041181
ACSF2_HUMAN	-0.0267951	0.0517348	-0.0551164	0.0230971	-0.0272651	-0.0864708	0.0272651	-0.108245
ACSF3_HUMAN	0.0667467	0.0585029	-0.0960073	0.0201384	-0.145525	-0.302279	0.350282	-0.113266
ACSL1_HUMAN	0.0516829	0.237316	-0.0824316	0.0925878	-0.15714	-0.0975434	0.0282196	-0.0465613
ACSL3_HUMAN	0.0946738	-0.0812795	-0.0229821	-0.2074	0.00391656	-0.00938475	0.216813	0.0274282
ACSL4_HUMAN	-0.0588374	-0.050634	0.159776	0.00874651	0.0290801	-0.130845	-0.0144812	0.00348484
ACSL5_HUMAN	NA	NA	NA	NA	NA	NA	NA	NA
ACSL6_HUMAN	-0.517051	-0.332932	0.298001	-0.321401	0.25721	-0.148005	-0.305148	0.156395
ACSS3_HUMAN	-0.136078	0.039615	0.00989858	0.0717642	0.0564104	0.0619135	0.0127445	-0.012093
ACTA_HUMAN	NA	NA	NA	NA	NA	NA	NA	NA
ACTB_HUMAN	-0.322892	-0.111152	0.758523	0.00910122	0.172308	0.00946067	0.120944	0.100149
ACTBL_HUMAN	0.0628488	-0.124105	-0.0195859	-0.073522	0.0134111	0.00232444	-0.00673981	0.0304432
ACTBM_HUMAN	0.473124	-0.0730991	-0.0657537	-0.119099	0.233237	0.21545	-0.261614	0.106417
ACTG_HUMAN	-0.00914766	-0.0964066	0.526002	-0.024611	0.240838	-0.176105	-0.169217	0.20707
ACTN1_HUMAN	0.111192	-0.00134394	-0.0482985	0.144518	-0.191388	-0.0979141	0.0508948	-0.0296564
ACTN2_HUMAN	0.163239	0.0110826	-0.0428403	0.0564554	-0.243703	-0.0437833	0.0215272	-0.103664
ACTN3_HUMAN	-0.446788	-0.624436	-0.101633	0.116886	0.514275	-0.540577	0.675999	0.551435
ACTN4_HUMAN	-0.115764	0.0366462	0.0189689	0.00804715	-0.208992	-0.227953	0.0171909	0.181075
ACTS_HUMAN	0.0631996	-0.00844612	-0.103457	0.0498334	-0.235511	-0.0063528	0.111574	-0.0707463
ACTY_HUMAN	-0.131801	-0.0112131	-0.139525	-0.00999574	0.166204	0.0361488	0.0562122	0.0593795
ACTZ_HUMAN	0.0494535	-0.0793257	-0.137513	-0.0627446	-0.0929869	-0.00170431	0.119596	0.0396991
ACV1C_HUMAN	NA	NA	NA	NA	NA	NA	NA	NA
ACY1_HUMAN	0.0433888	0.222393	-0.0486667	-0.126325	0.00785496	-0.0233174	-0.0497579	-0.0426612
ACY2_HUMAN	-0.247733	-0.00612726	-0.0644471	-0.00686243	0.25706	0.0119781	-0.111334	0.0419539
ACYP1_HUMAN	-0.0875768	-0.00376278	0.243156	-0.312139	0.25477	0.233813	-0.298823	0.198558
ACYP2_HUMAN	0.415185	-0.512441	-0.648921	-0.0899534	-0.169868	0.401731	0.16954	0.0112666
ADA_HUMAN	-0.0424877	-0.0446688	-0.102555	-0.113769	0.249882	-0.124364	-0.167394	0.138776
ADA10_HUMAN	0.245096	-0.0446864	0.120964	0.199519	-0.0453994	-0.0665748	0.342051	-0.027872
ADAL_HUMAN	0.163726	0.05342	-0.129234	-0.1211	0.00565498	0.048839	-0.148069	-0.0161198
ADAM9_HUMAN	NA	NA	NA	NA	NA	NA	NA	NA
ADAS_HUMAN	0.0209697	-0.0110074	0.0472272	0.0296494	-0.334325	-0.0729574	-0.0170147	-0.0221647
ADCK1_HUMAN	NA	NA	NA	NA	NA	NA	NA	NA
ADCK2_HUMAN	NA	NA	NA	NA	NA	NA	NA	NA
ADCK5_HUMAN	0.0498128	-0.321545	0.0413723	0.0147047	-0.173604	-0.0147047	0.00380157	-0.0413723
ADCY2_HUMAN	-0.00658101	0.136049	0.271067	-0.0948628	0.535545	0.208605	0.0645694	-0.0828161
ADCY6_HUMAN	NA	NA	NA	NA	NA	NA	NA	NA
ADCY9_HUMAN	0.0560066	-0.0743799	-0.0799732	0.0587388	-0.427707	0.162277	0.0527857	-0.0267498
ADDA_HUMAN	0.0839319	-0.157665	0.471817	-0.0779868	0.560372	0.0710197	-0.192364	0.113289
ADDB_HUMAN	0.0855121	-0.096295	0.913778	-0.03875	0.973157	-0.0296518	-0.249204	0.258198
ADDG_HUMAN	-0.102069	0.00470611	-0.0917628	-0.0737355	0.233012	0.00629994	-0.0795244	0.273631
ADH1B_HUMAN	-0.0695969	0.0715015	-0.290561	-0.194403	0.131401	0.63442	-0.151039	0.159083
ADH1G_HUMAN	0.0834566	-0.0834566	-0.512345	-0.292251	0.382251	-0.578323	-0.178524	1.14012
ADHX_HUMAN	0.0314266	0.0157368	-0.0335698	-0.0496389	-0.0543101	0.278961	-0.0966366	0.0496389
ADIPO_HUMAN	0.0107145	-0.107939	-0.219051	0.0828414	0.0709035	0.117766	-0.111351	0.148111
ADIRF_HUMAN	-0.324383	0.132791	-0.630558	0.0642978	-0.162763	-0.621937	-0.566694	-0.0292583
ADK_HUMAN	0.0400871	-0.0135954	0.109032	-0.275285	0.0254229	0.0862525	-0.0966828	0.0067242
ADPPT_HUMAN	0.0663231	-0.013366	-0.121018	-0.167363	0.15036	0.0498512	-0.124101	-0.0337302
ADPRH_HUMAN	0.178742	-0.00931247	-0.0417466	-0.105924	-0.011414	-0.111175	0.0699221	0.00931247
ADRM1_HUMAN	0.267015	-0.0850866	-0.134946	-0.0728432	0.180364	-0.0331585	-0.0280251	0.116957
ADRO_HUMAN	-0.235186	-0.196434	0.129619	0.0876248	0.0130445	-0.137405	0.0936333	-0.326518
ADT1_HUMAN	0.0181566	0.28201	-0.0558572	0.248753	-0.197844	-0.335034	-0.0146349	-0.197304
ADT2_HUMAN	0.18202	0.119117	-0.014871	0.0989808	-0.0490271	-0.143356	-0.0372171	-0.0947771
ADT3_HUMAN	0.031735	-0.0105059	0.0105059	-0.0694139	0.0143006	-0.180187	0.019757	0.0398813
ADX_HUMAN	9.8e-05	-0.0144338	0.758765	0.0313869	0.362182	0.0442296	-0.0872094	-0.0297347
AEBP1_HUMAN	NA	NA	NA	NA	NA	NA	NA	NA
AEDO_HUMAN	-0.054931	-0.277854	-0.0361774	-0.112191	0.0812744	0.303195	-0.164726	-0.00962755
AES_HUMAN	-0.0260524	-0.0752944	0.277492	-0.141505	0.296811	-0.051176	0.181932	0.0260524
AFAD_HUMAN	0.13673	0.047048	-0.179339	0.0469272	-0.399236	-0.041023	-0.0194957	0.00566753
AFAM_HUMAN	0.287264	0.0397046	-0.184617	-0.284055	1.24994	0.494354	-0.430026	0.556025
AFG1L_HUMAN	-0.0169547	0.0745943	-0.493212	0.11932	-0.375439	-0.221266	0.12436	-0.204375
AFG32_HUMAN	0.014474	0.169717	-0.052604	0.107065	-0.209856	-0.152989	0.111462	-0.078027
AGAL_HUMAN	NA	NA	NA	NA	NA	NA	NA	NA
AGAP3_HUMAN	NA	NA	NA	NA	NA	NA	NA	NA
AGFG1_HUMAN	-0.100423	-0.103054	0.0792233	-0.105703	0.180536	0.0192522	0.0176326	0.119956
AGK_HUMAN	-0.107874	0.0983253	0.000269882	0.184366	-0.268884	-0.136355	0.0254091	-0.0686103
AGM1_HUMAN	0.198205	-0.0114044	-0.146967	-0.0235034	-0.0192846	-0.0140344	-0.0954734	-0.000310603
AGO1_HUMAN	-0.0972688	0.0654185	-0.0367886	-0.184665	-0.0370819	0.00928038	0.140345	-0.0991997
AGO2_HUMAN	0.0278669	-0.0708665	0.357798	-0.155379	0.3868	-0.044916	-0.159468	0.0322062
AGO3_HUMAN	-0.0121688	0.0305598	-0.107323	-0.0718818	0.0140207	-0.0145138	0.148684	0.0472793
AGO4_HUMAN	0.523222	0.195783	0.459456	-0.0319458	-0.18219	-0.190244	0.207533	-0.148589
AGRIN_HUMAN	-0.0307463	0.194783	-0.0971047	-0.0349072	-0.0644662	-0.0638747	0.0844998	0.0433051
AHNK_HUMAN	-0.0164113	-0.0115696	-0.176063	-0.0200289	-0.132313	0.0498597	0.0270901	0.132177
AHNK2_HUMAN	NA	NA	NA	NA	NA	NA	NA	NA
AHSA1_HUMAN	-0.0302155	0.0289196	-0.193053	-0.0410248	-0.0177506	0.104935	-0.0993187	0.0311308
AHSP_HUMAN	-0.117062	-0.176725	1.43849	-0.718436	0.92442	0.102364	-0.610017	-0.136869
AIDA_HUMAN	-0.0410622	-0.114731	0.355114	0.0387017	0.128241	-0.10749	0.0370422	0.543258
AIF1_HUMAN	NA	NA	NA	NA	NA	NA	NA	NA
AIF1L_HUMAN	NA	NA	NA	NA	NA	NA	NA	NA
AIFM1_HUMAN	-0.0773506	0.157892	-0.052324	0.134318	-0.303346	-0.0962483	0.141688	-0.178433
AIFM2_HUMAN	NA	NA	NA	NA	NA	NA	NA	NA
AIMP1_HUMAN	0.0298734	0.00147437	-0.130216	-0.0523435	0.0106627	0.0153334	-0.0191931	-0.050333
AIMP2_HUMAN	0.0049988	0.0401779	-0.197041	-0.00973373	-0.024664	0.0337177	0.051239	-0.0723793
AIP_HUMAN	-0.114313	0.0633219	-0.119525	-0.253311	0.0535999	0.0410382	-0.155262	0.00462934
AK1A1_HUMAN	0.0928737	-0.0659899	-0.0060372	-0.144264	0.117819	0.0659899	-0.0661641	0.101216
AK1BF_HUMAN	NA	NA	NA	NA	NA	NA	NA	NA
AK1C1_HUMAN	NA	NA	NA	NA	NA	NA	NA	NA
AK1C2_HUMAN	0.266585	-0.198991	-0.139085	0.0332013	-0.116771	0.0740453	-0.194776	0.152889
AK1C3_HUMAN	0.0909828	-0.163918	-0.000309012	0.0162195	-0.151391	0.0292983	-0.115104	0.0614379
AKA12_HUMAN	0.0874601	-0.0542443	-0.267645	-0.0752395	-0.0076764	0.0566824	-0.212864	0.324607
AKA7G_HUMAN	-0.00340155	-0.0485946	-0.233814	-0.12882	0.158751	0.00287408	-0.0546035	0.0917473
AKAP1_HUMAN	0.206053	0.0423551	-0.194614	0.00516882	-0.121046	-0.0291707	-0.0282915	-0.015705
AKAP2_HUMAN	0.0790703	0.0964278	-0.236685	0.134774	-0.270336	0.10902	0.143134	-0.0327158
AKAP6_HUMAN	0.247899	-0.0781747	-0.105929	0.12996	0.0949317	-0.0135998	0.0209102	0.108905
AKAP8_HUMAN	NA	NA	NA	NA	NA	NA	NA	NA
AKAP9_HUMAN	-0.034458	-0.0725242	0.0905077	-0.15294	0.0027546	0.0779299	-0.0137074	0.0658041
AKP13_HUMAN	NA	NA	NA	NA	NA	NA	NA	NA
AKP8L_HUMAN	0.0897166	0.121735	0.452736	-0.013591	0.575006	-0.0191769	-0.0640239	0.201738
AKT1_HUMAN	0.122709	0.125532	-0.206142	0.0248755	0.424623	-0.0868115	-0.37629	0.120343
AKT2_HUMAN	-0.0167809	0.0850534	-0.0407634	-0.126996	-0.0822645	0.0746432	-0.0228405	0.0331635
AKTIP_HUMAN	0.0846733	0.160489	-0.119729	0.00382812	-0.207662	-0.180723	-0.0125505	-0.00382812
AKTS1_HUMAN	0.0382443	0.126327	-0.252918	0.0130183	-0.197461	0.157119	-0.15794	0.0906798
AL1A1_HUMAN	0.164371	0.115611	-0.00248699	-0.427164	-0.00918377	-0.446026	-0.0937092	0.465689
AL1A2_HUMAN	-0.0430778	0.0996365	-0.291928	-0.0694909	0.194836	0.00573476	-0.106123	0.0921406
AL1A3_HUMAN	NA	NA	NA	NA	NA	NA	NA	NA
AL1B1_HUMAN	0.0121335	0.368289	-0.0422299	0.568301	-0.0762924	-0.331975	-0.12861	-0.174983
AL1L1_HUMAN	0.0188744	0.296088	-0.10557	0.0488815	-0.107964	0.0139558	0.0013523	-0.22109
AL1L2_HUMAN	NA	NA	NA	NA	NA	NA	NA	NA
AL3A2_HUMAN	0.020428	0.123704	-0.143467	0.0206736	-0.0819469	0.0174829	-0.0198982	-0.101002
AL4A1_HUMAN	0.0369943	0.0911307	-0.0516314	0.0606173	-0.328347	-0.199689	-0.00451488	-0.0296809
AL7A1_HUMAN	0.295939	0.12232	0.0865677	0.216637	-0.148358	-0.0717658	-0.352045	0.106455
AL9A1_HUMAN	0.0407227	0.0230319	-0.232796	-0.0755108	-0.0521024	0.0496332	0.041447	0.0876694
ALAT1_HUMAN	0.0678092	0.0497321	-0.00188328	0.00437463	-0.154356	-0.0393193	-0.0788073	-0.0602538
ALAT2_HUMAN	0.148044	0.057636	0.04329	0.145626	-0.120686	-0.00248913	-0.109775	-0.0087564
ALDH2_HUMAN	0.0559294	0.0427361	0.0253388	0.202888	-0.326703	-0.0652415	-0.032851	-0.148193
ALDOA_HUMAN	-0.164337	0.0287681	-0.24598	-0.127864	0.00293655	0.223916	-0.025823	0.00755692
ALDOC_HUMAN	-0.15208	-0.0223097	-0.228294	-0.131807	-0.0171875	0.229803	0.00695287	0.0137012
ALDR_HUMAN	0.0705931	0.135135	-0.255978	-0.154267	-0.0396813	0.153768	-0.0700606	0.0500806
ALG1_HUMAN	0.290707	-0.182875	-0.0368132	0.0632103	0.0985689	0.155366	-0.112016	0.16269
ALG11_HUMAN	-0.516171	-0.0882415	0.240585	-0.0577378	0.0419552	-0.252346	-0.0683172	-0.0712886
ALG2_HUMAN	0.532563	-0.0637485	0.495579	0.0627592	0.89097	-0.616585	-0.350799	0.0614389
ALG5_HUMAN	0.0364591	-0.0575319	0.0230257	-0.0629401	0.0206571	-0.055841	-0.0175625	-0.0340205
ALG9_HUMAN	-0.372576	0.0918564	0.114378	-0.255525	0.330177	0.105462	-0.0361377	0.0361377
ALKB5_HUMAN	0.0935866	-0.0248356	-0.0118931	-0.260441	-0.258026	0.0638334	0.0109042	-0.0466867
ALPK2_HUMAN	NA	NA	NA	NA	NA	NA	NA	NA
ALPK3_HUMAN	0.145135	0.0348977	-0.117188	-0.0232322	-0.209812	-0.0218591	0.117887	-0.0917833
ALR_HUMAN	0.160649	0.0196162	-0.0143431	0.299795	-0.230311	-0.117552	0.0465973	-0.0130282
ALS_HUMAN	0.140124	-0.0359589	0.221708	-0.194084	0.801834	0.203959	-0.300917	0.339141
ALS2_HUMAN	NA	NA	NA	NA	NA	NA	NA	NA
AMBP_HUMAN	0.173376	-0.093188	-0.114502	-0.17725	0.630257	0.0389748	-0.479786	0.292947
AMFR_HUMAN	-0.139629	0.110205	-0.100844	0.0794944	0.16094	0.0033355	-0.0110809	0.0600558
AMPB_HUMAN	0.250135	-0.120809	-0.130404	-0.285648	0.00911674	0.198454	-0.0817525	-0.0398013
AMPD1_HUMAN	0.0719338	0.0540871	-0.0814159	0.107252	-0.117244	-0.360774	0.190338	-0.0204426
AMPD3_HUMAN	0.50118	-0.382191	0.261803	-0.0297374	0.0515527	-0.204785	0.0457716	-0.202552
AMPL_HUMAN	0.144861	0.111769	-0.116968	0.00445078	-0.0793866	-0.230268	0.076535	0.0150028
AMPN_HUMAN	-0.150302	0.0730599	0.352661	-0.00901311	0.267162	-0.13399	-0.154769	0.245371
AMRP_HUMAN	-0.124797	0.0789674	-0.110559	-0.0817276	-0.178205	0.366757	0.0995185	-0.0720544
AMZ2_HUMAN	0.0132253	0.23963	-0.139649	-0.107097	-0.0132253	0.233091	-0.00226846	-0.163374
AN13A_HUMAN	NA	NA	NA	NA	NA	NA	NA	NA
AN32A_HUMAN	0.245649	-0.220697	-0.3886	-0.186297	0.0682037	0.21317	0.0676067	-0.119754
AN32B_HUMAN	-0.0278459	-0.0621642	0.115103	-0.0879174	0.185891	0.0124542	-0.196372	0.148287
AN32E_HUMAN	-0.0158856	-0.123793	-0.0207831	-0.0929605	0.224439	0.0473269	0.00439042	0.0485836
ANFY1_HUMAN	0.0417341	-0.190745	0.484016	-0.0635742	0.385225	-0.193273	-0.0143469	0.121731
ANGI_HUMAN	-0.219423	-0.0663136	-0.136788	-0.287923	0.193819	0.390891	-0.170776	0.407657
ANGL2_HUMAN	NA	NA	NA	NA	NA	NA	NA	NA
ANGT_HUMAN	0.0510568	-0.102987	0.254475	-0.261791	0.993504	0.200223	-0.589548	0.464224
ANK1_HUMAN	0.0359866	-0.0823483	0.933499	-0.0662637	0.900409	0.0095055	-0.240961	0.250876
ANK2_HUMAN	-0.0122794	0.00198979	-0.0724163	0.0120379	-0.0204278	0.0765856	0.0310894	-0.0145181
ANK3_HUMAN	-0.00608426	-0.0729425	-0.153067	-0.0636219	-0.0588822	0.185374	0.110223	0.0442804
ANKR1_HUMAN	0.204143	0.463425	-0.373911	-0.216915	0.158266	0.495855	-0.485712	-0.0612906
ANKR2_HUMAN	0.720395	-0.190386	-0.288996	-0.13495	-0.00189415	-0.0582968	-0.00995201	0.0603554
ANKY2_HUMAN	0.0530481	-0.16688	-0.136861	-0.0208494	0.00303213	0.0386681	-0.0015041	0.00951994
ANM1_HUMAN	0.0706576	0.31431	-0.0866618	0.216629	-0.0282953	-0.0446447	-0.11239	-0.164972
ANM5_HUMAN	0.0311842	-0.0169624	0.003246	-0.0379492	0.0150953	-0.0284717	-0.041286	-0.0230163
ANM7_HUMAN	0.240397	0.00506503	-0.0935168	-0.3183	0.0944334	0.0756078	-0.642866	-0.0291631
ANO10_HUMAN	0.272075	-0.280599	0.134484	-0.097927	-0.0846296	-0.0891608	0.178565	-0.0513053
ANO6_HUMAN	-0.0661249	-0.150474	0.0767215	-0.0067454	0.00214775	0.030693	0.350983	0.154216
ANR17_HUMAN	0.0106929	-0.0330352	-0.0482591	-0.0197703	0.181806	0.149851	0.0201368	-0.0106929
ANR23_HUMAN	0.0918993	-0.0801101	-0.147426	-0.028406	-0.0491031	0.089788	0.305354	0.0622119
ANR28_HUMAN	0.0564957	-0.0996831	-0.0128588	-0.00688629	-0.0396073	0.00846337	0.0584956	-0.0785409
ANR35_HUMAN	-0.0145581	-0.219226	-0.0799623	-0.0910575	-0.10927	0.256133	-0.025577	0.18159
ANR39_HUMAN	NA	NA	NA	NA	NA	NA	NA	NA
ANR44_HUMAN	NA	NA	NA	NA	NA	NA	NA	NA
ANS1A_HUMAN	NA	NA	NA	NA	NA	NA	NA	NA
ANT3_HUMAN	0.0859959	-0.0454366	0.00817613	-0.200726	0.913547	0.14548	-0.322753	0.280768
ANX11_HUMAN	0.032976	0.0386699	-0.0992415	-0.0263968	-0.0160053	0.000545825	-0.0568599	-0.0229118
ANXA1_HUMAN	-0.0206811	-0.038049	0.0146293	-0.115975	0.2415	0.057605	-0.251107	0.384679
ANXA2_HUMAN	0.0556349	0.0125212	-0.226945	-0.0358742	0.00189328	0.0228999	-0.0578285	0.287075
ANXA3_HUMAN	0.0636139	0.00753766	0.21328	0.0393886	-0.314818	-0.25846	-0.167069	0.0715881
ANXA4_HUMAN	0.268719	0.140804	-0.024396	-0.0248296	0.056447	0.0373226	-0.239947	0.037943
ANXA5_HUMAN	0.158317	-0.0152593	-0.182699	0.0628362	0.173861	-0.0670325	-0.209394	0.0598926
ANXA6_HUMAN	0.0192425	-0.0374237	-0.222774	-0.0994138	0.000945255	0.0971666	-0.055881	0.132767
ANXA7_HUMAN	0.0779003	0.0448396	-0.00580478	-0.0926838	-0.00355949	-0.0761669	-0.0777949	0.0613398
AOC3_HUMAN	-0.286324	-0.105791	-0.0910712	-0.1748	0.197662	0.0372331	0.0877642	0.328055
AOFA_HUMAN	-0.428262	1.15501	0.207322	-0.281847	0.331377	0.537298	-0.222559	0.299064
AOFB_HUMAN	0.115612	0.115006	0.0247553	0.14792	-0.159773	-0.109037	-0.0205229	-0.119911
AOXA_HUMAN	-0.332798	0.161693	-0.189393	-0.0638935	0.0671527	-0.00186951	0.0772056	0.275726
AP1B1_HUMAN	-0.003435	0.0147	-0.0294633	-0.0900745	0.00746076	0.011522	-0.0299136	0.0742609
AP1G1_HUMAN	0.0337498	0.0531537	-0.0428771	-0.023007	0.0080196	-0.076725	0.0275709	0.089761
AP1M1_HUMAN	0.0233459	-0.06625	-0.159991	-0.0474021	-0.00345582	0.147428	-0.164844	0.0141142
AP1S2_HUMAN	-0.128314	-0.304882	0.00282237	-0.236576	-0.209047	0.245679	-0.347135	-0.0960192
AP2A1_HUMAN	0.0311165	-0.0334118	0.108196	-0.0566362	0.148202	-0.0396067	-0.0390882	-0.00664068
AP2A2_HUMAN	-0.184908	-0.0675758	-0.00901824	-0.17005	0.0274301	-0.0442778	0.0686593	0.180747
AP2B1_HUMAN	-0.0731002	-0.0533655	0.0717116	-0.0731773	0.203206	-0.00147335	-0.0173321	-0.00384512
AP2M1_HUMAN	-0.0096817	-0.081515	0.07026	-0.0976649	0.0525939	-0.111199	0.00338368	0.020408
AP2S1_HUMAN	0.152492	0.0493044	-0.0607919	-0.278007	-0.117121	0.012957	0.26962	-0.328025
AP3B1_HUMAN	0.0418549	-0.159697	0.0402113	-0.0616185	0.352243	0.114284	-0.15212	-0.0263521
AP3D1_HUMAN	0.113012	-0.0698703	0.0162476	0.0697541	0.0745006	-0.127016	-0.0162476	0.0685006
AP3M1_HUMAN	-0.0710879	0.0742744	0.115513	0.0143179	0.307697	-0.106121	-0.0228454	0.076462
AP4A_HUMAN	0.17502	-0.00805325	0.167497	-0.029986	0.0139596	0.373436	-0.202423	-0.0108577
AP4B1_HUMAN	-0.0116576	-0.209772	-0.0312388	-0.0614553	-0.336532	0.0116576	0.396303	0.092011
AP4E1_HUMAN	-0.00611507	0.0395706	-0.0368188	-0.0528033	-0.0601945	-0.0549012	0.00277203	-0.0123241
AP4M1_HUMAN	NA	NA	NA	NA	NA	NA	NA	NA
AP4S1_HUMAN	NA	NA	NA	NA	NA	NA	NA	NA
AP5S1_HUMAN	NA	NA	NA	NA	NA	NA	NA	NA
AP5Z1_HUMAN	0.0553898	0.357042	0.0142124	0.0182636	0.21025	-0.275867	-0.234958	-0.0142124
APBB1_HUMAN	-0.081098	0.028665	-0.148708	0.426563	-0.110361	-0.22539	0.298799	0.249226
APBB2_HUMAN	0.881575	-0.0412131	0.00948808	-0.0618499	1.0402	0.145639	-0.359278	0.467249
APC1_HUMAN	NA	NA	NA	NA	NA	NA	NA	NA
APC16_HUMAN	0.0179601	-0.202094	0.237494	0.0432504	0.718403	0.153189	-0.194171	-0.0179601
APC7_HUMAN	NA	NA	NA	NA	NA	NA	NA	NA
APEX1_HUMAN	0.038345	-0.00713353	-0.0203452	0.00712954	-0.10284	0.0227036	-0.0227036	-0.0211165
API5_HUMAN	0.00488778	0.0167357	-0.0836311	-0.0258515	-0.130119	0.0939897	0.0691781	-0.0203311
APMAP_HUMAN	0.0728659	-0.0658927	0.118018	-0.00954304	-0.0563007	-0.0502175	-0.103274	-0.0121663
APOA_HUMAN	NA	NA	NA	NA	NA	NA	NA	NA
APOA1_HUMAN	0.295856	0.0150862	-0.134456	-0.195683	1.23007	0.581823	-0.524341	0.469235
APOA2_HUMAN	0.163191	-0.0586209	-0.265636	0.175824	0.739946	0.0586209	-0.654542	0.111062
APOA4_HUMAN	0.184186	0.0823092	-0.0853439	-0.213826	0.908601	0.0460101	-0.350507	0.629278
APOB_HUMAN	0.55839	0.00871911	-0.0502041	-0.158645	1.07314	0.0232825	-0.339907	0.635196
APOC1_HUMAN	0.274039	0.11013	0.477147	-0.169351	1.49019	0.426043	-0.551295	-0.0346556
APOC3_HUMAN	-0.0810857	0.00718988	-0.064862	-0.293573	1.35066	0.529212	-0.445421	0.197769
APOD_HUMAN	0.0215401	0.0408263	-0.111384	-0.348557	0.981843	0.226662	-0.337067	0.397283
APOE_HUMAN	0.205514	-0.164086	0.0520005	-0.208609	0.716356	0.438129	-0.0970251	0.123554
APOF_HUMAN	NA	NA	NA	NA	NA	NA	NA	NA
APOH_HUMAN	-0.0170718	0.0966975	-0.128188	0.0294191	0.213381	0.054657	-0.176654	0.139385
APOL1_HUMAN	0.109837	-0.0508139	-0.252522	0.122962	0.855936	0.165295	-0.349556	0.131658
APOL2_HUMAN	NA	NA	NA	NA	NA	NA	NA	NA
APOM_HUMAN	NA	NA	NA	NA	NA	NA	NA	NA
APT_HUMAN	0.00944169	0.00761908	0.156177	-0.090519	0.277637	-0.167271	-0.258277	0.0441864
APTX_HUMAN	0.0426375	-0.52501	-0.0426375	0.103796	0.226677	-0.408131	0.177143	0.064715
AQP1_HUMAN	-0.0977596	0.0334046	0.12903	-0.0966377	0.0310505	0.008695	0.0038768	-0.00303951
AQP4_HUMAN	1.58581	0.93564	1.06357	-0.0933034	0.5795	-0.00558265	-0.469523	-0.122285
AQR_HUMAN	NA	NA	NA	NA	NA	NA	NA	NA
AR6P4_HUMAN	NA	NA	NA	NA	NA	NA	NA	NA
ARAF_HUMAN	0.189818	0.022205	-0.129435	-0.063964	-0.272192	0.0340287	0.0366616	0.0612349
ARAP1_HUMAN	-0.0711323	0.426786	0.0304582	-0.257301	0.474334	0.0231316	-0.190917	0.0726202
ARBK1_HUMAN	0.00924304	-0.0308663	-0.0193945	-0.0945398	-0.0663587	0.111993	-0.00233674	-0.0174608
ARC1A_HUMAN	0.185664	0.023518	-0.0973479	-0.0792917	0.177897	-0.044571	0.0745468	0.00392157
ARC1B_HUMAN	-0.120643	-0.229722	0.239471	0.0248828	0.102564	0.388085	0.0132248	-0.233011
ARCH_HUMAN	0.166574	-0.169622	0.0385924	-0.268266	0.109725	0.179397	-0.510528	-0.0385924
ARF3_HUMAN	NA	NA	NA	NA	NA	NA	NA	NA
ARF4_HUMAN	0.0439203	0.00381794	0.0810707	-0.137882	0.0631065	0.0884646	-0.126639	-0.00703898
ARF5_HUMAN	0.088968	-0.174079	-0.207077	-0.0385451	-0.0719906	0.0173972	-0.0419155	0.0785418
ARF6_HUMAN	0.0370119	0.0125135	0.00664279	-0.0382265	0.141898	-0.013453	-0.12847	0.0966447
ARFG1_HUMAN	NA	NA	NA	NA	NA	NA	NA	NA
ARFG2_HUMAN	-0.00452098	-0.0967354	-0.158839	0.0708693	0.0819551	0.238543	-0.107261	-0.0123609
ARFG3_HUMAN	NA	NA	NA	NA	NA	NA	NA	NA
ARFRP_HUMAN	NA	NA	NA	NA	NA	NA	NA	NA
ARGAL_HUMAN	-0.166368	0.143694	-0.0738648	0.0542001	0.382102	-0.0601363	-0.150141	0.226949
ARGI1_HUMAN	-0.0921742	0.00208832	1.01347	-0.203492	0.798858	0.00361856	-0.215084	0.301638
ARGI2_HUMAN	NA	NA	NA	NA	NA	NA	NA	NA
ARHG1_HUMAN	0.0400057	-0.105407	0.323902	-0.757102	0.0205984	-0.361857	0.0444761	0.389341
ARHG2_HUMAN	NA	NA	NA	NA	NA	NA	NA	NA
ARHG6_HUMAN	0.328091	-0.0842309	-0.0382112	0.280834	-0.0634637	0.00625072	-0.00625072	-0.124615
ARHG7_HUMAN	0.10434	0.0576198	-0.126092	-0.0760096	-0.218123	0.100704	0.00766384	0.0384618
ARHGA_HUMAN	0.217558	-0.0104939	0.239194	-0.0488341	-0.149039	-0.316442	0.0104939	0.119772
ARHGB_HUMAN	-0.0206429	0.0160883	0.125429	0.038371	0.161755	-0.0838351	-0.213714	0.117409
ARHL1_HUMAN	0.113155	-0.290147	-0.355695	-0.19227	0.0750769	0.12131	0.13614	0.053426
ARHL2_HUMAN	0.00792299	-0.0229636	-0.212094	-0.0522296	0.00304665	0.131252	0.000859945	0.0522296
ARI1_HUMAN	0.00961663	-0.041879	-0.160088	-0.105374	-0.000724333	0.0655211	0.0471757	-0.0235032
ARI1A_HUMAN	-0.050871	-0.144916	0.269977	0.111612	0.0258744	-0.455278	-0.240603	-0.141664
ARI1B_HUMAN	NA	NA	NA	NA	NA	NA	NA	NA
ARI2_HUMAN	0.394259	-0.252939	-0.0106073	-0.00954609	0.171792	-0.126775	0.00437256	0.0106073
ARK72_HUMAN	-0.0783699	0.00453132	-0.0610816	-0.0400841	0.151594	-0.020137	-0.126752	0.0483159
ARL1_HUMAN	0.321402	-0.000493324	-0.069884	-0.0919398	-0.0260211	-0.0686753	-0.0814859	0.000493324
ARL15_HUMAN	0.0277478	-0.126188	0.0768075	-0.137511	-0.0782375	-0.0196185	0.0290834	0.0811358
ARL2_HUMAN	0.264143	0.014798	-0.0313996	-0.0203661	0.0163859	-0.17451	0.0444674	-0.12473
ARL3_HUMAN	0.0212282	0.0125577	-0.0264895	-0.0851778	-0.0949864	0.0524076	-0.354735	-0.0125577
ARL8A_HUMAN	0.233399	-0.224956	-0.138215	-0.0496378	-0.202881	0.247299	-0.00527704	0.110882
ARL8B_HUMAN	0.0622617	-0.133381	-0.266877	-0.00344296	-0.0300937	0.00362258	0.0656923	0.0896744
ARLY_HUMAN	0.0861173	0.115145	0.225587	-0.126166	0.266446	-0.118123	-0.173446	0.0105209
ARM10_HUMAN	-0.0990037	-0.114643	0.115436	-0.135181	0.22686	0.204255	-0.0875204	0.00621095
ARMC1_HUMAN	0.2205	0.051063	-0.0297239	0.101016	-0.114625	-0.0259551	-0.0298868	-0.181049
ARMC6_HUMAN	0.237931	-0.0369915	-0.13326	-0.139552	-0.0516171	0.112603	0.00946262	0.0850902
ARMC8_HUMAN	0.0135987	0.0173579	0.00678811	-0.161637	-0.0249845	-0.0158249	0.117474	-0.0624925
ARMT1_HUMAN	0.111428	0.00147581	-0.230709	-0.0649655	-0.135484	0.00935857	-0.088877	0.0650849
ARMX1_HUMAN	0.525223	0.0912721	-0.136333	0.384384	-0.0222485	-0.0948674	0.112317	-0.159847
ARMX2_HUMAN	0.551239	-0.0540066	-0.0449833	0.429395	-0.220576	0.057326	0.0266651	-0.0333595
ARMX3_HUMAN	0.20421	-0.0263529	0.225398	-0.00168609	0.0263529	-0.0502325	0.144939	-0.0339257
ARP10_HUMAN	-0.0209552	-0.0241849	-0.00337981	-0.140523	0.00175021	0.0160804	0.103914	-0.0160804
ARP19_HUMAN	0.0104092	-0.122001	-0.234648	0.0331253	-0.402272	0.0360945	0.286775	-0.0135786
ARP2_HUMAN	0.00100993	0.00498715	0.0390807	-0.0389721	-0.044715	-0.0233272	-0.113749	0.0138653
ARP21_HUMAN	-0.0119134	-0.177272	0.0119134	0.114194	-0.107608	0.0549135	0.0723788	-0.0681792
ARP3_HUMAN	0.139714	-0.0320038	0.0951885	-0.0933071	-0.000461425	-0.0746785	-0.135126	0.0573384
ARP5L_HUMAN	0.152028	-0.0712312	-0.362782	-0.0205263	-0.146389	0.224222	0.0516088	-0.0919361
ARP6_HUMAN	NA	NA	NA	NA	NA	NA	NA	NA
ARPC2_HUMAN	0.141941	-0.00896033	0.156571	-0.0581193	0.114494	-0.18969	-0.232974	0.0109356
ARPC3_HUMAN	0.0567363	-0.103928	0.172378	-0.104601	-0.0118902	-0.101	-0.0744384	0.0879217
ARPC4_HUMAN	0.152511	0.0139878	0.102769	0.0401747	0.00264761	-0.339959	-0.306764	-0.0712447
ARPC5_HUMAN	-0.103982	-0.0961215	-0.103282	0.0107313	0.211222	0.185154	0.109651	0.0968359
ARPIN_HUMAN	-0.117299	0.304289	-0.502815	-0.0574949	-0.0400144	0.676401	-0.00227472	0.00227472
ARRB1_HUMAN	-0.194427	0.544092	0.177348	-0.0987146	-0.000735689	0.000423238	-0.000423238	0.0737926
ARRD1_HUMAN	0.172833	-0.0634297	-0.213921	-0.22181	-0.0277356	-0.0871376	0.00149694	0.109564
ARSB_HUMAN	0.0444757	-0.330357	0.889118	-0.00411465	0.650149	-0.144285	-0.223951	0.267117
ARVC_HUMAN	0.208322	-0.129265	-0.15205	-0.0239018	-0.250264	0.139142	0.159534	-0.0557605
ARY1_HUMAN	NA	NA	NA	NA	NA	NA	NA	NA
AS3MT_HUMAN	0.0801194	0.07128	-0.0141453	-0.160089	0.143876	-0.112236	-0.140213	-0.0338376
ASAH1_HUMAN	0.124156	0.0514976	-0.135508	-0.185537	-0.295354	0.0195047	-0.0068246	-0.0242671
ASAP1_HUMAN	-1.43403	-0.347408	0.70434	-1.30712	1.16754	0.813265	-0.662912	0.454182
ASAP3_HUMAN	0.0562042	-0.164811	-0.0912748	-0.0513308	0.378722	0.0513308	-0.0835501	0.268994
ASB1_HUMAN	-0.00155563	0.00155563	0.476226	-0.17974	0.463306	0.208402	-0.400688	0.301908
ASB10_HUMAN	0.0771132	-0.157792	0.0191998	-0.0671443	-0.00322208	0.0480361	0.0240308	-0.130203
ASB11_HUMAN	0.118142	0.00677538	-0.0903153	0.0378045	-0.203468	0.000276741	-0.0167637	-0.00713927
ASB12_HUMAN	-0.0281763	-0.289296	0.144504	0.150437	0.316278	0.0783415	-0.63562	-0.148313
ASB14_HUMAN	0.19608	0.217624	-0.0529997	0.0200502	-0.0431941	-0.0843898	-0.0233848	-0.0618157
ASB15_HUMAN	-0.119874	-0.00192231	0.0781811	-0.3084	-0.149858	0.353554	0.00192231	0.162136
ASB16_HUMAN	NA	NA	NA	NA	NA	NA	NA	NA
ASB2_HUMAN	0.276411	-0.0534919	-0.0371863	0.000448221	-0.135932	-0.0199162	0.139679	-0.237252
ASB5_HUMAN	0.0066511	-0.135688	-0.128361	-0.00713776	0.113447	-0.0888806	-0.0206486	-0.0375195
ASB8_HUMAN	0.00577851	-0.024221	0.0238422	-0.069813	0.0533119	-0.0116809	-0.0352926	-0.278495
ASCC3_HUMAN	NA	NA	NA	NA	NA	NA	NA	NA
ASGL1_HUMAN	NA	NA	NA	NA	NA	NA	NA	NA
ASH2L_HUMAN	0.04497	-0.065951	-0.0340543	-0.0522062	-0.0743918	0.4192	0.257411	0.0814199
ASML_HUMAN	0.271881	0.228841	-0.0953286	-0.060449	-0.216452	0.0157257	0.060449	-0.0346093
ASNA_HUMAN	0.00700296	-0.0271123	0.256767	-0.115384	0.298326	0.00542207	-0.224356	0.0203595
ASPC1_HUMAN	0.151173	0.0345066	-0.147813	-0.0781171	-0.0593482	0.030365	-0.0742279	-0.0145248
ASPG_HUMAN	0.206606	-0.40475	0.145674	-0.121281	-0.229739	0.26287	0.0142306	0.0215889
ASPH_HUMAN	-0.0552868	-0.0358753	-0.071074	0.0166489	-0.0669428	0.217004	0.163329	0.0583655
ASPM_HUMAN	NA	NA	NA	NA	NA	NA	NA	NA
ASPN_HUMAN	-0.218133	0.0790845	0.209807	0.0219011	-0.0264902	-0.271205	0.320644	1.00029
ASSY_HUMAN	0.0292522	0.0335975	-0.178321	0.202283	-0.1624	-0.0189039	-0.143074	0.122663
AT11A_HUMAN	-0.057387	0.0161199	-0.148948	0.065377	-0.233901	0.0889768	0.0615804	0.116159
AT131_HUMAN	-0.00963607	0.0785464	-0.057923	0.0610168	-0.13137	-0.0385114	0.0617438	-0.0762707
AT1A1_HUMAN	0.207159	-0.105768	-0.0380107	0.0565965	-0.0881731	-0.188954	0.0689438	0.121336
AT1A2_HUMAN	0.0199423	-0.0273558	-0.059686	-0.00383652	-0.153763	-0.0907349	0.191329	-0.00643628
AT1B1_HUMAN	0.0337932	-0.0167648	-0.0859422	0.027202	-0.321371	-0.0989195	0.316996	-0.00546775
AT1B3_HUMAN	-1.23856	0.19631	-0.375668	-0.499545	0.0842746	0.195441	0.199319	-0.0726498
AT1B4_HUMAN	0.100917	-0.0418156	0.119269	-0.103754	-0.103172	-0.00388445	0.115604	0.15898
AT2A1_HUMAN	-0.711887	0.0471608	-0.172339	-0.207492	-0.000425281	0.254537	0.22046	0.0136665
AT2A2_HUMAN	0.544305	-0.0455922	0.0631884	0.296778	-0.299848	-0.289429	0.0154375	-0.0108754
AT2A3_HUMAN	0.0877512	-0.0660291	-0.00788026	0.0405212	-0.249002	-0.0213337	0.270344	-0.0249612
AT2B1_HUMAN	0.0217275	-0.0215734	0.0181126	0.0489501	-0.0498616	-0.0398835	0.0514358	0.0216934
AT2B2_HUMAN	-0.63904	0.0473464	-0.10381	-0.00955271	-0.220042	0.334986	0.284184	-0.0473464
AT2B4_HUMAN	-0.059669	0.0299279	0.196613	-0.062948	0.14624	-0.0818597	-0.0195874	0.00703998
AT2C1_HUMAN	NA	NA	NA	NA	NA	NA	NA	NA
AT2L2_HUMAN	0.035038	-0.283216	-0.127031	-0.215669	0.178905	-0.0122485	0.0815426	0.0416289
AT5F1_HUMAN	-0.0247634	0.308434	-0.137763	0.358055	-0.211485	-0.196142	0.0910399	-0.165465
AT8A1_HUMAN	0.0333555	-0.00267124	0.00717231	-0.0117476	-0.00172321	0.0448646	-0.0491214	0.0375536
ATAD1_HUMAN	0.217945	0.422611	-0.0825745	-0.00898044	-0.187753	-0.113781	0.086189	-0.0615568
ATD3A_HUMAN	0.0746976	0.00689425	0.0161789	-0.0633736	-0.070172	-0.0890412	-0.109332	0.0522961
ATD3B_HUMAN	0.0606815	0.0839989	-0.0943389	0.247966	-0.245629	-0.179326	0.300423	-0.0970393
ATD3C_HUMAN	NA	NA	NA	NA	NA	NA	NA	NA
ATE1_HUMAN	0.154816	-0.0913084	-0.0866277	-0.0844604	0.00225553	0.0337515	-0.0846968	0.0503949
ATG2A_HUMAN	0.0695451	0.188571	0.00842574	-0.350201	0.00126455	-0.198423	-0.294179	-0.251568
ATG2B_HUMAN	0.0169509	-0.163073	-0.212055	-0.210202	-0.0666318	0.165017	0.155517	-0.0169509
ATG3_HUMAN	0.125358	0.0196868	0.510943	-0.0521876	0.510373	-0.0196868	-0.225321	-0.0409272
ATG4A_HUMAN	0.181488	-0.23312	0.1532	-0.306178	0.194162	0.0261415	-0.133085	-0.00589826
ATG4B_HUMAN	0.105445	0.0571004	-0.0674371	-0.0840354	-0.0254129	-0.0432747	-0.126282	-0.0121432
ATG5_HUMAN	0.0247173	-0.0223049	-0.0891855	-0.04723	-0.103046	-0.0647116	-0.0828414	0.0576177
ATG7_HUMAN	0.0642929	0.0859239	0.020399	-0.0188396	0.0585112	-0.0308598	-0.0903387	-0.00365707
ATG9A_HUMAN	0.0215561	-0.0281898	0.128899	-0.0246612	0.0394127	-0.077319	0.0716008	-0.0537677
ATL4_HUMAN	NA	NA	NA	NA	NA	NA	NA	NA
ATLA2_HUMAN	0.00581323	0.147809	-0.165093	0.0327693	-0.0554616	0.0508117	0.0222664	-0.0149929
ATLA3_HUMAN	-0.145704	0.0142135	0.174181	-0.128834	0.0742019	-0.146628	0.00809196	0.40253
ATM_HUMAN	NA	NA	NA	NA	NA	NA	NA	NA
ATOX1_HUMAN	0.229977	-0.161628	-0.0699281	-0.0948468	0.0234702	-0.17398	-0.192201	0.0989791
ATP23_HUMAN	-0.151074	0.00541862	-0.072731	-0.210941	-0.174742	0.307924	0.0110914	-0.0663318
ATP5H_HUMAN	0.00201646	0.335318	-0.12985	0.351318	-0.282343	-0.248477	0.101067	-0.198164
ATP5I_HUMAN	0.00209548	0.22995	-0.0325209	0.16467	-0.137981	-0.108315	-0.0171451	-0.169579
ATP5J_HUMAN	-0.110541	0.231681	0.026957	0.173283	-0.148461	-0.688545	0.182475	0.00590059
ATP5L_HUMAN	0.00432087	0.365833	-0.0927136	0.21889	-0.0326331	-0.186759	0.0401905	-0.148576
ATP5S_HUMAN	-0.00719754	0.163183	-0.0280602	0.13611	-0.020788	-0.28878	0.00806091	-0.100727
ATP6_HUMAN	0.00293815	0.41078	-0.213527	0.460583	-0.291716	-0.365858	0.0905306	-0.282949
ATP9A_HUMAN	NA	NA	NA	NA	NA	NA	NA	NA
ATPA_HUMAN	-0.00999646	0.206415	-0.0619329	0.224032	-0.14495	-0.194152	0.0403185	-0.137222
ATPB_HUMAN	-0.0221266	0.186578	-0.0489904	0.175998	-0.155121	-0.165587	0.0223611	-0.110617
ATPD_HUMAN	0.0442202	0.0359399	-0.120482	0.149064	-0.124265	-0.0588797	0.0500948	-0.180726
ATPF1_HUMAN	0.00190492	0.264023	-0.0725655	0.141079	-0.0817482	-0.249633	0.0837492	-0.193691
ATPF2_HUMAN	0.12116	0.167953	-0.131618	0.12385	0.0534476	-0.182647	-0.125407	-0.215361
ATPG_HUMAN	0.0124899	0.299667	-0.0027407	0.307518	-0.0852802	-0.313334	0.0170204	-0.136684
ATPK_HUMAN	0.0375446	0.258484	0.0811834	0.458527	-0.110617	-0.349158	0.0931491	-0.132965
ATPO_HUMAN	-0.0419382	0.258775	-0.088361	0.258738	-0.162951	-0.15682	0.0549892	-0.0652578
ATRN_HUMAN	0.362387	-0.072037	-0.081524	-0.112875	0.328383	0.637005	-0.242292	0.274753
ATRX_HUMAN	NA	NA	NA	NA	NA	NA	NA	NA
ATX10_HUMAN	0.0854027	0.0182775	-0.223585	-0.0597762	-0.0295163	0.011187	0.0233366	-0.0433047
ATX2_HUMAN	0.0468145	-0.0891337	-0.176208	-0.0597209	0.0275798	0.00443292	0.0262082	-0.0333142
ATX2L_HUMAN	-0.0230235	-0.0724809	-0.0851637	0.0138718	0.244391	-0.0877934	0.068712	-0.024368
AUHM_HUMAN	0.0273295	0.402386	-0.0698556	0.351087	-0.159779	-0.274284	-0.197079	-0.119745
[truncated: 5,687 more rows]

## Sheet: Protein-Statistics
Protein Fold Change Expression and statistics between MasterAthlete (MA) and NonAthlete (NA)
[truncated: 6,178 more rows]
