# Supplementary material for: Unbiased proteomics, histochemistry, and mitochondrial DNA copy number reveal better mitochondrial health in muscle of high-functioning octogenarians
Source: eLife. 2022 Apr 11;11:e74335. doi: 10.7554/eLife.74335 (PMC9090325; doi:10.7554/eLife.74335)
Supplement: Supplementary file 2. [file elife-74335-supp2.xlsx]

## Sheet: Underrepresented_MA-p<0.05
Underrepresented proteins in Master Athletes (p<0.05)
ProteinID	log2FC	p.ord	GenePrimary	Gene Names	ProteinDesc.1	t.ord	t.mod	p.mod	q.ord	q.mod	df.0	df.r	s2.0	s2	s2.post	Length.y	GOCC	GOMF	GOBP	Function	Mass	MassKDa
PSA2_HUMAN	-0.028871	0.0451075	PSMA2	PSMA2 HC3 PSC3	Proteasome subunit alpha type-2	-2.13733	-1.30255	0.205989	0.267066	0.477284	2.35568	20	0.0186794	0.00109479	0.00294773	234	cytosol [GO:0005829]; extracellular exosome [GO:0070062]; extracellular region [GO:0005576]; ficolin-1-rich granule lumen [GO:1904813]; nucleoplasm [GO:0005654]; nucleus [GO:0005634]; P-body [GO:0000932]; proteasome complex [GO:0000502]; proteasome core complex [GO:0005839]; proteasome core complex, alpha-subunit complex [GO:0019773]; secretory granule lumen [GO:0034774]; threonine-type endopepti…	cytosol [GO:0005829]; extracellular exosome [GO:0070062]; extracellular region [GO:0005576]; ficolin-1-rich granule lumen [GO:1904813]; nucleoplasm [GO:0005654]; nucleus [GO:0005634]; P-body [GO:0000932]; proteasome complex [GO:0000502]; proteasome core complex [GO:0005839]; proteasome core complex, alpha-subunit complex [GO:0019773]; secretory granule lumen [GO:0034774]; threonine-type endopepti…	cytosol [GO:0005829]; extracellular exosome [GO:0070062]; extracellular region [GO:0005576]; ficolin-1-rich granule lumen [GO:1904813]; nucleoplasm [GO:0005654]; nucleus [GO:0005634]; P-body [GO:0000932]; proteasome complex [GO:0000502]; proteasome core complex [GO:0005839]; proteasome core complex, alpha-subunit complex [GO:0019773]; secretory granule lumen [GO:0034774]; threonine-type endopepti…	Component of the 20S core proteasome complex involved in the proteolytic degradation of most intracellular proteins. This complex plays numerous essential roles within the cell by associating with different regulatory particles. Associated with two 19S regulatory particles, forms the 26S proteasome and thus participates in the ATP-dependent degradation of ubiquitinated proteins. The 26S proteasom…	25899	26
PSB1_HUMAN	-0.0367404	0.00785104	PSMB1	PSMB1 PSC5	Proteasome subunit beta type-1	-2.95373	-1.70112	0.102791	0.139988	0.371944	2.35568	20	0.0186794	0.000928318	0.0027988	241	cytosol [GO:0005829]; extracellular exosome [GO:0070062]; extracellular region [GO:0005576]; ficolin-1-rich granule lumen [GO:1904813]; nucleoplasm [GO:0005654]; nucleus [GO:0005634]; proteasome complex [GO:0000502]; proteasome core complex [GO:0005839]; secretory granule lumen [GO:0034774]; threonine-type endopeptidase activity [GO:0004298]; anaphase-promoting complex-dependent catabolic process…	cytosol [GO:0005829]; extracellular exosome [GO:0070062]; extracellular region [GO:0005576]; ficolin-1-rich granule lumen [GO:1904813]; nucleoplasm [GO:0005654]; nucleus [GO:0005634]; proteasome complex [GO:0000502]; proteasome core complex [GO:0005839]; secretory granule lumen [GO:0034774]; threonine-type endopeptidase activity [GO:0004298]; anaphase-promoting complex-dependent catabolic process…	cytosol [GO:0005829]; extracellular exosome [GO:0070062]; extracellular region [GO:0005576]; ficolin-1-rich granule lumen [GO:1904813]; nucleoplasm [GO:0005654]; nucleus [GO:0005634]; proteasome complex [GO:0000502]; proteasome core complex [GO:0005839]; secretory granule lumen [GO:0034774]; threonine-type endopeptidase activity [GO:0004298]; anaphase-promoting complex-dependent catabolic process…	Component of the 20S core proteasome complex involved in the proteolytic degradation of most intracellular proteins. This complex plays numerous essential roles within the cell by associating with different regulatory particles. Associated with two 19S regulatory particles, forms the 26S proteasome and thus participates in the ATP-dependent degradation of ubiquitinated proteins. The 26S proteasom…	26489	26
SGCA_HUMAN	-0.0368694	0.0209399	SGCA	SGCA ADL DAG2	Alpha-sarcoglycan	-2.50652	-1.61432	0.120485	0.189955	0.392348	2.35568	20	0.0186794	0.0012982	0.0031297	387	cell-cell junction [GO:0005911]; cytoplasm [GO:0005737]; cytoskeleton [GO:0005856]; dystrophin-associated glycoprotein complex [GO:0016010]; integral component of membrane [GO:0016021]; membrane raft [GO:0045121]; sarcoglycan complex [GO:0016012]; sarcolemma [GO:0042383]; calcium ion binding [GO:0005509]; membrane organization [GO:0061024]; muscle contraction [GO:0006936]; muscle organ developmen…	cell-cell junction [GO:0005911]; cytoplasm [GO:0005737]; cytoskeleton [GO:0005856]; dystrophin-associated glycoprotein complex [GO:0016010]; integral component of membrane [GO:0016021]; membrane raft [GO:0045121]; sarcoglycan complex [GO:0016012]; sarcolemma [GO:0042383]; calcium ion binding [GO:0005509]; membrane organization [GO:0061024]; muscle contraction [GO:0006936]; muscle organ developmen…	cell-cell junction [GO:0005911]; cytoplasm [GO:0005737]; cytoskeleton [GO:0005856]; dystrophin-associated glycoprotein complex [GO:0016010]; integral component of membrane [GO:0016021]; membrane raft [GO:0045121]; sarcoglycan complex [GO:0016012]; sarcolemma [GO:0042383]; calcium ion binding [GO:0005509]; membrane organization [GO:0061024]; muscle contraction [GO:0006936]; muscle organ developmen…	Component of the sarcoglycan complex, a subcomplex of the dystrophin-glycoprotein complex which forms a link between the F-actin cytoskeleton and the extracellular matrix.	42875	43
RYR1_HUMAN	-0.0416133	0.0143227	RYR1	RYR1 RYDR	Ryanodine receptor 1	-2.68227	-1.78518	0.0878091	0.167612	0.34639	2.35568	20	0.0186794	0.00144415	0.00326028	5038	cell cortex [GO:0005938]; cytoplasm [GO:0005737]; extracellular exosome [GO:0070062]; I band [GO:0031674]; integral component of organelle membrane [GO:0031301]; integral component of plasma membrane [GO:0005887]; junctional membrane complex [GO:0030314]; junctional sarcoplasmic reticulum membrane [GO:0014701]; plasma membrane [GO:0005886]; ryanodine receptor complex [GO:1990425]; sarcoplasmic re…	cell cortex [GO:0005938]; cytoplasm [GO:0005737]; extracellular exosome [GO:0070062]; I band [GO:0031674]; integral component of organelle membrane [GO:0031301]; integral component of plasma membrane [GO:0005887]; junctional membrane complex [GO:0030314]; junctional sarcoplasmic reticulum membrane [GO:0014701]; plasma membrane [GO:0005886]; ryanodine receptor complex [GO:1990425]; sarcoplasmic re…	cell cortex [GO:0005938]; cytoplasm [GO:0005737]; extracellular exosome [GO:0070062]; I band [GO:0031674]; integral component of organelle membrane [GO:0031301]; integral component of plasma membrane [GO:0005887]; junctional membrane complex [GO:0030314]; junctional sarcoplasmic reticulum membrane [GO:0014701]; plasma membrane [GO:0005886]; ryanodine receptor complex [GO:1990425]; sarcoplasmic re…	Calcium channel that mediates the release of Ca(2+) from the sarcoplasmic reticulum into the cytoplasm and thereby plays a key role in triggering muscle contraction following depolarization of T-tubules (PubMed:11741831, PubMed:16163667). Repeated very high-level exercise increases the open probability of the channel and leads to Ca(2+) leaking into the cytoplasm (PubMed:18268335). Can also media…	565176	565
DCTN1_HUMAN	-0.0419191	0.0240937	DCTN1	DCTN1	Dynactin subunit 1	-2.44058	-1.7229	0.0987135	0.205634	0.366001	2.35568	20	0.0186794	0.00177007	0.00355185	1278	actin cytoskeleton [GO:0015629]; cell leading edge [GO:0031252]; centriole [GO:0005814]; centrosome [GO:0005813]; cytoplasm [GO:0005737]; cytosol [GO:0005829]; dynactin complex [GO:0005869]; dynein complex [GO:0030286]; kinetochore [GO:0000776]; membrane [GO:0016020]; microtubule [GO:0005874]; microtubule plus-end [GO:0035371]; nuclear envelope [GO:0005635]; spindle [GO:0005819]; spindle pole [GO…	actin cytoskeleton [GO:0015629]; cell leading edge [GO:0031252]; centriole [GO:0005814]; centrosome [GO:0005813]; cytoplasm [GO:0005737]; cytosol [GO:0005829]; dynactin complex [GO:0005869]; dynein complex [GO:0030286]; kinetochore [GO:0000776]; membrane [GO:0016020]; microtubule [GO:0005874]; microtubule plus-end [GO:0035371]; nuclear envelope [GO:0005635]; spindle [GO:0005819]; spindle pole [GO…	actin cytoskeleton [GO:0015629]; cell leading edge [GO:0031252]; centriole [GO:0005814]; centrosome [GO:0005813]; cytoplasm [GO:0005737]; cytosol [GO:0005829]; dynactin complex [GO:0005869]; dynein complex [GO:0030286]; kinetochore [GO:0000776]; membrane [GO:0016020]; microtubule [GO:0005874]; microtubule plus-end [GO:0035371]; nuclear envelope [GO:0005635]; spindle [GO:0005819]; spindle pole [GO…	Plays a key role in dynein-mediated retrograde transport of vesicles and organelles along microtubules by recruiting and tethering dynein to microtubules. Binds to both dynein and microtubules providing a link between specific cargos, microtubules and dynein. Essential for targeting dynein to microtubule plus ends, recruiting dynein to membranous cargos and enhancing dynein processivity (the abil…	141695	142
PA2G4_HUMAN	-0.0428491	0.0324538	PA2G4	PA2G4 EBP1	Proliferation-associated protein 2G4	-2.29842	-1.69511	0.103941	0.232992	0.37218	2.35568	20	0.0186794	0.00208534	0.0038339	394	azurophil granule lumen [GO:0035578]; cytoplasm [GO:0005737]; extracellular exosome [GO:0070062]; extracellular region [GO:0005576]; intracellular ribonucleoprotein complex [GO:0030529]; membrane [GO:0016020]; nucleolus [GO:0005730]; nucleus [GO:0005634]; DNA binding [GO:0003677]; RNA binding [GO:0003723]; transcription factor activity, sequence-specific DNA binding [GO:0003700]; ubiquitin protei…	azurophil granule lumen [GO:0035578]; cytoplasm [GO:0005737]; extracellular exosome [GO:0070062]; extracellular region [GO:0005576]; intracellular ribonucleoprotein complex [GO:0030529]; membrane [GO:0016020]; nucleolus [GO:0005730]; nucleus [GO:0005634]; DNA binding [GO:0003677]; RNA binding [GO:0003723]; transcription factor activity, sequence-specific DNA binding [GO:0003700]; ubiquitin protei…	azurophil granule lumen [GO:0035578]; cytoplasm [GO:0005737]; extracellular exosome [GO:0070062]; extracellular region [GO:0005576]; intracellular ribonucleoprotein complex [GO:0030529]; membrane [GO:0016020]; nucleolus [GO:0005730]; nucleus [GO:0005634]; DNA binding [GO:0003677]; RNA binding [GO:0003723]; transcription factor activity, sequence-specific DNA binding [GO:0003700]; ubiquitin protei…	May play a role in a ERBB3-regulated signal transduction pathway. Seems be involved in growth regulation. Acts a corepressor of the androgen receptor (AR) and is regulated by the ERBB3 ligand neuregulin-1/heregulin (HRG). Inhibits transcription of some E2F1-regulated promoters, probably by recruiting histone acetylase (HAT) activity. Binds RNA. Associates with 28S, 18S and 5.8S mature rRNAs, seve…	43787	44
EIF3E_HUMAN	-0.0436404	0.0336505	EIF3E	EIF3E EIF3S6 INT6	Eukaryotic translation initiation factor 3 subunit E	-2.28092	-1.70447	0.102155	0.235449	0.370803	2.35568	20	0.0186794	0.00219639	0.00393325	445	cytoplasm [GO:0005737]; cytosol [GO:0005829]; eukaryotic translation initiation factor 3 complex [GO:0005852]; extracellular exosome [GO:0070062]; membrane [GO:0016020]; nuclear body [GO:0016604]; nucleoplasm [GO:0005654]; nucleus [GO:0005634]; PML body [GO:0016605]; cadherin binding [GO:0045296]; protein N-terminus binding [GO:0047485]; RNA binding [GO:0003723]; translation initiation factor act…	cytoplasm [GO:0005737]; cytosol [GO:0005829]; eukaryotic translation initiation factor 3 complex [GO:0005852]; extracellular exosome [GO:0070062]; membrane [GO:0016020]; nuclear body [GO:0016604]; nucleoplasm [GO:0005654]; nucleus [GO:0005634]; PML body [GO:0016605]; cadherin binding [GO:0045296]; protein N-terminus binding [GO:0047485]; RNA binding [GO:0003723]; translation initiation factor act…	cytoplasm [GO:0005737]; cytosol [GO:0005829]; eukaryotic translation initiation factor 3 complex [GO:0005852]; extracellular exosome [GO:0070062]; membrane [GO:0016020]; nuclear body [GO:0016604]; nucleoplasm [GO:0005654]; nucleus [GO:0005634]; PML body [GO:0016605]; cadherin binding [GO:0045296]; protein N-terminus binding [GO:0047485]; RNA binding [GO:0003723]; translation initiation factor act…	Component of the eukaryotic translation initiation factor 3 (eIF-3) complex, which is required for several steps in the initiation of protein synthesis (PubMed:17581632, PubMed:25849773, PubMed:27462815). The eIF-3 complex associates with the 40S ribosome and facilitates the recruitment of eIF-1, eIF-1A, eIF-2:GTP:methionyl-tRNAi and eIF-5 to form the 43S pre-initiation complex (43S PIC). The eIF…	52221	52
CSN8_HUMAN	-0.0444844	0.0443544	COPS8	COPS8 CSN8	COP9 signalosome complex subunit 8	-2.14568	-1.66645	0.109575	0.265552	0.37945	2.35568	20	0.0186794	0.00257891	0.00427546	209	COP9 signalosome [GO:0008180]; cytosol [GO:0005829]; extracellular exosome [GO:0070062]; nucleoplasm [GO:0005654]; nucleus [GO:0005634]; perinuclear region of cytoplasm [GO:0048471]; activation of NF-kappaB-inducing kinase activity [GO:0007250]; COP9 signalosome assembly [GO:0010387]; negative regulation of cell proliferation [GO:0008285]; nucleotide-excision repair, DNA damage recognition [GO:00…	COP9 signalosome [GO:0008180]; cytosol [GO:0005829]; extracellular exosome [GO:0070062]; nucleoplasm [GO:0005654]; nucleus [GO:0005634]; perinuclear region of cytoplasm [GO:0048471]; activation of NF-kappaB-inducing kinase activity [GO:0007250]; COP9 signalosome assembly [GO:0010387]; negative regulation of cell proliferation [GO:0008285]; nucleotide-excision repair, DNA damage recognition [GO:00…	COP9 signalosome [GO:0008180]; cytosol [GO:0005829]; extracellular exosome [GO:0070062]; nucleoplasm [GO:0005654]; nucleus [GO:0005634]; perinuclear region of cytoplasm [GO:0048471]; activation of NF-kappaB-inducing kinase activity [GO:0007250]; COP9 signalosome assembly [GO:0010387]; negative regulation of cell proliferation [GO:0008285]; nucleotide-excision repair, DNA damage recognition [GO:00…	Component of the COP9 signalosome complex (CSN), a complex involved in various cellular and developmental processes. The CSN complex is an essential regulator of the ubiquitin (Ubl) conjugation pathway by mediating the deneddylation of the cullin subunits of SCF-type E3 ligase complexes, leading to decrease the Ubl ligase activity of SCF-type complexes such as SCF, CSA or DDB2. The complex is als…	23226	23
RAC1_HUMAN	-0.0462749	0.0236338	RAC1	RAC1 TC25 MIG5	Ras-related C3 botulinum toxin substrate 1	-2.44967	-1.81885	0.0823574	0.202952	0.337925	2.35568	20	0.0186794	0.00214105	0.00388374	192	cytoplasm [GO:0005737]; cytoplasmic ribonucleoprotein granule [GO:0036464]; cytosol [GO:0005829]; dendritic spine [GO:0043197]; early endosome membrane [GO:0031901]; endoplasmic reticulum membrane [GO:0005789]; extracellular exosome [GO:0070062]; extracellular matrix [GO:0031012]; extrinsic component of plasma membrane [GO:0019897]; ficolin-1-rich granule membrane [GO:0101003]; focal adhesion [GO…	cytoplasm [GO:0005737]; cytoplasmic ribonucleoprotein granule [GO:0036464]; cytosol [GO:0005829]; dendritic spine [GO:0043197]; early endosome membrane [GO:0031901]; endoplasmic reticulum membrane [GO:0005789]; extracellular exosome [GO:0070062]; extracellular matrix [GO:0031012]; extrinsic component of plasma membrane [GO:0019897]; ficolin-1-rich granule membrane [GO:0101003]; focal adhesion [GO…	cytoplasm [GO:0005737]; cytoplasmic ribonucleoprotein granule [GO:0036464]; cytosol [GO:0005829]; dendritic spine [GO:0043197]; early endosome membrane [GO:0031901]; endoplasmic reticulum membrane [GO:0005789]; extracellular exosome [GO:0070062]; extracellular matrix [GO:0031012]; extrinsic component of plasma membrane [GO:0019897]; ficolin-1-rich granule membrane [GO:0101003]; focal adhesion [GO…	Plasma membrane-associated small GTPase which cycles between active GTP-bound and inactive GDP-bound states. In its active state, binds to a variety of effector proteins to regulate cellular responses such as secretory processes, phagocytosis of apoptotic cells, epithelial cell polarization and growth-factor induced formation of membrane ruffles. Rac1 p21/rho GDI heterodimer is the active compone…	21450	21
BABA1_HUMAN	-0.0474816	0.0473078	BABAM1	BABAM1 C19orf62 MERIT40 NBA1 HSPC142	BRISC and BRCA1-A complex member 1	-2.11364	-1.70063	0.102883	0.272583	0.371992	2.35568	20	0.0186794	0.0030279	0.00467714	329	BRCA1-A complex [GO:0070531]; BRISC complex [GO:0070552]; cytoplasm [GO:0005737]; cytosol [GO:0005829]; nuclear body [GO:0016604]; nucleoplasm [GO:0005654]; nucleus [GO:0005634]; cell cycle [GO:0007049]; cell division [GO:0051301]; covalent chromatin modification [GO:0016569]; double-strand break repair [GO:0006302]; double-strand break repair via nonhomologous end joining [GO:0006303]; G2 DNA da…	BRCA1-A complex [GO:0070531]; BRISC complex [GO:0070552]; cytoplasm [GO:0005737]; cytosol [GO:0005829]; nuclear body [GO:0016604]; nucleoplasm [GO:0005654]; nucleus [GO:0005634]; cell cycle [GO:0007049]; cell division [GO:0051301]; covalent chromatin modification [GO:0016569]; double-strand break repair [GO:0006302]; double-strand break repair via nonhomologous end joining [GO:0006303]; G2 DNA da…	BRCA1-A complex [GO:0070531]; BRISC complex [GO:0070552]; cytoplasm [GO:0005737]; cytosol [GO:0005829]; nuclear body [GO:0016604]; nucleoplasm [GO:0005654]; nucleus [GO:0005634]; cell cycle [GO:0007049]; cell division [GO:0051301]; covalent chromatin modification [GO:0016569]; double-strand break repair [GO:0006302]; double-strand break repair via nonhomologous end joining [GO:0006303]; G2 DNA da…	Component of the BRCA1-A complex, a complex that specifically recognizes 'Lys-63'-linked ubiquitinated histones H2A and H2AX at DNA lesions sites, leading to target the BRCA1-BARD1 heterodimer to sites of DNA damage at double-strand breaks (DSBs). The BRCA1-A complex also possesses deubiquitinase activity that specifically removes 'Lys-63'-linked ubiquitin on histones H2A and H2AX. In the BRCA1-A…	36560	37
VPS4A_HUMAN	-0.0485163	0.031871	VPS4A	VPS4A VPS4	Vacuolar protein sorting-associated protein 4A	-2.30715	-1.80352	0.0848013	0.231712	0.34269	2.35568	20	0.0186794	0.00265322	0.00434194	437	centrosome [GO:0005813]; cytoplasm [GO:0005737]; cytosol [GO:0005829]; early endosome [GO:0005769]; endosome [GO:0005768]; extracellular exosome [GO:0070062]; Flemming body [GO:0090543]; late endosome [GO:0005770]; late endosome membrane [GO:0031902]; lysosome [GO:0005764]; midbody [GO:0030496]; nucleus [GO:0005634]; perinuclear region of cytoplasm [GO:0048471]; plasma membrane [GO:0005886]; spin…	centrosome [GO:0005813]; cytoplasm [GO:0005737]; cytosol [GO:0005829]; early endosome [GO:0005769]; endosome [GO:0005768]; extracellular exosome [GO:0070062]; Flemming body [GO:0090543]; late endosome [GO:0005770]; late endosome membrane [GO:0031902]; lysosome [GO:0005764]; midbody [GO:0030496]; nucleus [GO:0005634]; perinuclear region of cytoplasm [GO:0048471]; plasma membrane [GO:0005886]; spin…	centrosome [GO:0005813]; cytoplasm [GO:0005737]; cytosol [GO:0005829]; early endosome [GO:0005769]; endosome [GO:0005768]; extracellular exosome [GO:0070062]; Flemming body [GO:0090543]; late endosome [GO:0005770]; late endosome membrane [GO:0031902]; lysosome [GO:0005764]; midbody [GO:0030496]; nucleus [GO:0005634]; perinuclear region of cytoplasm [GO:0048471]; plasma membrane [GO:0005886]; spin…	Involved in late steps of the endosomal multivesicular bodies (MVB) pathway. Recognizes membrane-associated ESCRT-III assemblies and catalyzes their disassembly, possibly in combination with membrane fission. Redistributes the ESCRT-III components to the cytoplasm for further rounds of MVB sorting. MVBs contain intraluminal vesicles (ILVs) that are generated by invagination and scission from the …	48898	49
NU153_HUMAN	-0.0511979	0.0397592	NUP153	NUP153	Nuclear pore complex protein Nup153	-2.19962	-1.79589	0.0860409	0.254843	0.344826	2.35568	20	0.0186794	0.00325057	0.00487635	1475	cytosol [GO:0005829]; nuclear inclusion body [GO:0042405]; nuclear membrane [GO:0031965]; nuclear periphery [GO:0034399]; nuclear pore [GO:0005643]; nuclear pore nuclear basket [GO:0044615]; nucleolus [GO:0005730]; nucleoplasm [GO:0005654]; DNA binding [GO:0003677]; identical protein binding [GO:0042802]; nuclear localization sequence binding [GO:0008139]; nucleocytoplasmic transporter activity […	cytosol [GO:0005829]; nuclear inclusion body [GO:0042405]; nuclear membrane [GO:0031965]; nuclear periphery [GO:0034399]; nuclear pore [GO:0005643]; nuclear pore nuclear basket [GO:0044615]; nucleolus [GO:0005730]; nucleoplasm [GO:0005654]; DNA binding [GO:0003677]; identical protein binding [GO:0042802]; nuclear localization sequence binding [GO:0008139]; nucleocytoplasmic transporter activity […	cytosol [GO:0005829]; nuclear inclusion body [GO:0042405]; nuclear membrane [GO:0031965]; nuclear periphery [GO:0034399]; nuclear pore [GO:0005643]; nuclear pore nuclear basket [GO:0044615]; nucleolus [GO:0005730]; nucleoplasm [GO:0005654]; DNA binding [GO:0003677]; identical protein binding [GO:0042802]; nuclear localization sequence binding [GO:0008139]; nucleocytoplasmic transporter activity […	Component of the nuclear pore complex (NPC), a complex required for the trafficking across the nuclear envelope. Functions as a scaffolding element in the nuclear phase of the NPC essential for normal nucleocytoplasmic transport of proteins and mRNAs. Involved in the quality control and retention of unspliced mRNAs in the nucleus; in association with TPR, regulates the nuclear export of unspliced…	153938	154
CDC5L_HUMAN	-0.0515814	0.0419554	CDC5L	CDC5L KIAA0432 PCDC5RP	Cell division cycle 5-like protein	-2.17317	-1.7882	0.0873075	0.259752	0.345833	2.35568	20	0.0186794	0.00338025	0.00499236	802	catalytic step 2 spliceosome [GO:0071013]; cytoplasm [GO:0005737]; membrane [GO:0016020]; nuclear speck [GO:0016607]; nucleoplasm [GO:0005654]; nucleus [GO:0005634]; perinuclear region of cytoplasm [GO:0048471]; protein-DNA complex [GO:0032993]; Prp19 complex [GO:0000974]; DNA binding [GO:0003677]; leucine zipper domain binding [GO:0043522]; protein kinase binding [GO:0019901]; protein phosphatas…	catalytic step 2 spliceosome [GO:0071013]; cytoplasm [GO:0005737]; membrane [GO:0016020]; nuclear speck [GO:0016607]; nucleoplasm [GO:0005654]; nucleus [GO:0005634]; perinuclear region of cytoplasm [GO:0048471]; protein-DNA complex [GO:0032993]; Prp19 complex [GO:0000974]; DNA binding [GO:0003677]; leucine zipper domain binding [GO:0043522]; protein kinase binding [GO:0019901]; protein phosphatas…	catalytic step 2 spliceosome [GO:0071013]; cytoplasm [GO:0005737]; membrane [GO:0016020]; nuclear speck [GO:0016607]; nucleoplasm [GO:0005654]; nucleus [GO:0005634]; perinuclear region of cytoplasm [GO:0048471]; protein-DNA complex [GO:0032993]; Prp19 complex [GO:0000974]; DNA binding [GO:0003677]; leucine zipper domain binding [GO:0043522]; protein kinase binding [GO:0019901]; protein phosphatas…	DNA-binding protein involved in cell cycle control. May act as a transcription activator. Component of the PRP19-CDC5L complex that forms an integral part of the spliceosome and is required for activating pre-mRNA splicing. The PRP19-CDC5L complex may also play a role in the response to DNA damage (DDR). {ECO:0000269|PubMed:10570151, ECO:0000269|PubMed:11082045, ECO:0000269|PubMed:11101529, ECO:0…	92251	92
NUP93_HUMAN	-0.0517922	0.00592356	NUP93	NUP93 KIAA0095	Nuclear pore complex protein Nup93	-3.07873	-2.14828	0.0427748	0.135096	0.26104	2.35568	20	0.0186794	0.001698	0.00348737	819	membrane [GO:0016020]; nuclear envelope [GO:0005635]; nuclear membrane [GO:0031965]; nuclear periphery [GO:0034399]; nuclear pore [GO:0005643]; structural constituent of nuclear pore [GO:0017056]; gene silencing by RNA [GO:0031047]; glomerular visceral epithelial cell development [GO:0072015]; glomerular visceral epithelial cell migration [GO:0090521]; intracellular transport of virus [GO:0075733…	membrane [GO:0016020]; nuclear envelope [GO:0005635]; nuclear membrane [GO:0031965]; nuclear periphery [GO:0034399]; nuclear pore [GO:0005643]; structural constituent of nuclear pore [GO:0017056]; gene silencing by RNA [GO:0031047]; glomerular visceral epithelial cell development [GO:0072015]; glomerular visceral epithelial cell migration [GO:0090521]; intracellular transport of virus [GO:0075733…	membrane [GO:0016020]; nuclear envelope [GO:0005635]; nuclear membrane [GO:0031965]; nuclear periphery [GO:0034399]; nuclear pore [GO:0005643]; structural constituent of nuclear pore [GO:0017056]; gene silencing by RNA [GO:0031047]; glomerular visceral epithelial cell development [GO:0072015]; glomerular visceral epithelial cell migration [GO:0090521]; intracellular transport of virus [GO:0075733…	Plays a role in the nuclear pore complex (NPC) assembly and/or maintenance. May anchor nucleoporins, but not NUP153 and TPR, to the NPC. During renal development, regulates podocyte migration and proliferation through SMAD4 signaling (PubMed:26878725). {ECO:0000269|PubMed:15229283, ECO:0000269|PubMed:15703211, ECO:0000269|PubMed:26878725}.	93488	93
GBB2_HUMAN	-0.0520317	0.0374837	GNB2	GNB2	Guanine nucleotide-binding protein G	-2.22847	-1.82174	0.0819029	0.24818	0.336923	2.35568	20	0.0186794	0.00327093	0.00489457	340	cell body [GO:0044297]; cytosol [GO:0005829]; extracellular exosome [GO:0070062]; extracellular space [GO:0005615]; focal adhesion [GO:0005925]; lysosomal membrane [GO:0005765]; membrane [GO:0016020]; myelin sheath [GO:0043209]; perinuclear region of cytoplasm [GO:0048471]; plasma membrane [GO:0005886]; protein complex [GO:0043234]; vesicle [GO:0031982]; calcium channel regulator activity [GO:000…	cell body [GO:0044297]; cytosol [GO:0005829]; extracellular exosome [GO:0070062]; extracellular space [GO:0005615]; focal adhesion [GO:0005925]; lysosomal membrane [GO:0005765]; membrane [GO:0016020]; myelin sheath [GO:0043209]; perinuclear region of cytoplasm [GO:0048471]; plasma membrane [GO:0005886]; protein complex [GO:0043234]; vesicle [GO:0031982]; calcium channel regulator activity [GO:000…	cell body [GO:0044297]; cytosol [GO:0005829]; extracellular exosome [GO:0070062]; extracellular space [GO:0005615]; focal adhesion [GO:0005925]; lysosomal membrane [GO:0005765]; membrane [GO:0016020]; myelin sheath [GO:0043209]; perinuclear region of cytoplasm [GO:0048471]; plasma membrane [GO:0005886]; protein complex [GO:0043234]; vesicle [GO:0031982]; calcium channel regulator activity [GO:000…	Guanine nucleotide-binding proteins (G proteins) are involved as a modulator or transducer in various transmembrane signaling systems. The beta and gamma chains are required for the GTPase activity, for replacement of GDP by GTP, and for G protein-effector interaction.	37331	37
PIMT_HUMAN	-0.0527535	0.0447646	PCMT1	PCMT1	Protein-L-isoaspartate	-2.14112	-1.78735	0.0874476	0.267066	0.345833	2.35568	20	0.0186794	0.00364228	0.00522678	227	cytoplasm [GO:0005737]; cytosol [GO:0005829]; extracellular exosome [GO:0070062]; extracellular vesicle [GO:1903561]; cadherin binding [GO:0045296]; protein-L-isoaspartate (D-aspartate) O-methyltransferase activity [GO:0004719]; protein methylation [GO:0006479]; protein repair [GO:0030091]	cytoplasm [GO:0005737]; cytosol [GO:0005829]; extracellular exosome [GO:0070062]; extracellular vesicle [GO:1903561]; cadherin binding [GO:0045296]; protein-L-isoaspartate (D-aspartate) O-methyltransferase activity [GO:0004719]; protein methylation [GO:0006479]; protein repair [GO:0030091]	cytoplasm [GO:0005737]; cytosol [GO:0005829]; extracellular exosome [GO:0070062]; extracellular vesicle [GO:1903561]; cadherin binding [GO:0045296]; protein-L-isoaspartate (D-aspartate) O-methyltransferase activity [GO:0004719]; protein methylation [GO:0006479]; protein repair [GO:0030091]	Catalyzes the methyl esterification of L-isoaspartyl and D-aspartyl residues in peptides and proteins that result from spontaneous decomposition of normal L-aspartyl and L-asparaginyl residues. It plays a role in the repair and/or degradation of damaged proteins. Acts on EIF4EBP2, microtubule-associated protein 2, calreticulin, clathrin light chains a and b, Ubiquitin carboxyl-terminal hydrolase …	24636	25
ACTZ_HUMAN	-0.0527875	0.0455746	ACTR1A	ACTR1A CTRN1	Alpha-centractin	-2.13221	-1.78314	0.088149	0.268594	0.346484	2.35568	20	0.0186794	0.00367748	0.00525828	376	centriole [GO:0005814]; centrosome [GO:0005813]; COPI-coated vesicle [GO:0030137]; cytoplasm [GO:0005737]; cytosol [GO:0005829]; dynactin complex [GO:0005869]; extracellular exosome [GO:0070062]; manchette [GO:0002177]; microtubule associated complex [GO:0005875]; microtubule cytoskeleton [GO:0015630]; myelin sheath [GO:0043209]; ATP binding [GO:0005524]; antigen processing and presentation of ex…	centriole [GO:0005814]; centrosome [GO:0005813]; COPI-coated vesicle [GO:0030137]; cytoplasm [GO:0005737]; cytosol [GO:0005829]; dynactin complex [GO:0005869]; extracellular exosome [GO:0070062]; manchette [GO:0002177]; microtubule associated complex [GO:0005875]; microtubule cytoskeleton [GO:0015630]; myelin sheath [GO:0043209]; ATP binding [GO:0005524]; antigen processing and presentation of ex…	centriole [GO:0005814]; centrosome [GO:0005813]; COPI-coated vesicle [GO:0030137]; cytoplasm [GO:0005737]; cytosol [GO:0005829]; dynactin complex [GO:0005869]; extracellular exosome [GO:0070062]; manchette [GO:0002177]; microtubule associated complex [GO:0005875]; microtubule cytoskeleton [GO:0015630]; myelin sheath [GO:0043209]; ATP binding [GO:0005524]; antigen processing and presentation of ex…	Component of a multi-subunit complex involved in microtubule based vesicle motility. It is associated with the centrosome.	42614	43
LMNB2_HUMAN	-0.0535671	0.0241081	LMNB2	LMNB2 LMN2	Lamin-B2	-2.44029	-1.9442	0.0645613	0.205634	0.302602	2.35568	20	0.0186794	0.0028911	0.00455475	620	lamin filament [GO:0005638]; nuclear inner membrane [GO:0005637]; structural molecule activity [GO:0005198]	lamin filament [GO:0005638]; nuclear inner membrane [GO:0005637]; structural molecule activity [GO:0005198]	lamin filament [GO:0005638]; nuclear inner membrane [GO:0005637]; structural molecule activity [GO:0005198]	Lamins are components of the nuclear lamina, a fibrous layer on the nucleoplasmic side of the inner nuclear membrane, which is thought to provide a framework for the nuclear envelope and may also interact with chromatin.	69948	70
XRCC5_HUMAN	-0.0536991	0.02666	XRCC5	XRCC5 G22P2	X-ray repair cross-complementing protein 5	-2.39261	-1.92435	0.0671319	0.213479	0.310192	2.35568	20	0.0186794	0.00302232	0.00467215	732	cytosol [GO:0005829]; extracellular region [GO:0005576]; Ku70:Ku80 complex [GO:0043564]; membrane [GO:0016020]; nonhomologous end joining complex [GO:0070419]; nuclear chromosome, telomeric region [GO:0000784]; nuclear telomere cap complex [GO:0000783]; nucleolus [GO:0005730]; nucleoplasm [GO:0005654]; nucleus [GO:0005634]; plasma membrane [GO:0005886]; protein complex [GO:0043234]; protein-DNA c…	cytosol [GO:0005829]; extracellular region [GO:0005576]; Ku70:Ku80 complex [GO:0043564]; membrane [GO:0016020]; nonhomologous end joining complex [GO:0070419]; nuclear chromosome, telomeric region [GO:0000784]; nuclear telomere cap complex [GO:0000783]; nucleolus [GO:0005730]; nucleoplasm [GO:0005654]; nucleus [GO:0005634]; plasma membrane [GO:0005886]; protein complex [GO:0043234]; protein-DNA c…	cytosol [GO:0005829]; extracellular region [GO:0005576]; Ku70:Ku80 complex [GO:0043564]; membrane [GO:0016020]; nonhomologous end joining complex [GO:0070419]; nuclear chromosome, telomeric region [GO:0000784]; nuclear telomere cap complex [GO:0000783]; nucleolus [GO:0005730]; nucleoplasm [GO:0005654]; nucleus [GO:0005634]; plasma membrane [GO:0005886]; protein complex [GO:0043234]; protein-DNA c…	Single-stranded DNA-dependent ATP-dependent helicase. Has a role in chromosome translocation. The DNA helicase II complex binds preferentially to fork-like ends of double-stranded DNA in a cell cycle-dependent manner. It works in the 3'-5' direction. Binding to DNA may be mediated by XRCC6. Involved in DNA non-homologous end joining (NHEJ) required for double-strand break repair and V(D)J recombi…	82705	83
SYP2L_HUMAN	-0.0561384	0.0436231	SYNPO2L	SYNPO2L	Synaptopodin 2-like protein	-2.15392	-1.83516	0.0798222	0.263318	0.331815	2.35568	20	0.0186794	0.00407581	0.00561463	977	actin cytoskeleton [GO:0015629]; cytosol [GO:0005829]; nuclear speck [GO:0016607]; nucleus [GO:0005634]; Z disc [GO:0030018]; actin binding [GO:0003779]; positive regulation of actin filament bundle assembly [GO:0032233]	actin cytoskeleton [GO:0015629]; cytosol [GO:0005829]; nuclear speck [GO:0016607]; nucleus [GO:0005634]; Z disc [GO:0030018]; actin binding [GO:0003779]; positive regulation of actin filament bundle assembly [GO:0032233]	actin cytoskeleton [GO:0015629]; cytosol [GO:0005829]; nuclear speck [GO:0016607]; nucleus [GO:0005634]; Z disc [GO:0030018]; actin binding [GO:0003779]; positive regulation of actin filament bundle assembly [GO:0032233]	Actin-associated protein that may play a role in modulating actin-based shape. {ECO:0000250}.	102481	102
SYEP_HUMAN	-0.0564092	0.0323936	EPRS	EPRS GLNS PARS QARS QPRS PIG32	Bifunctional glutamate/proline--tRNA ligase	-2.29931	-1.91631	0.0681989	0.232992	0.312558	2.35568	20	0.0186794	0.00361123	0.005199	1512	aminoacyl-tRNA synthetase multienzyme complex [GO:0017101]; cytoplasm [GO:0005737]; cytosol [GO:0005829]; GAIT complex [GO:0097452]; intracellular ribonucleoprotein complex [GO:0030529]; membrane [GO:0016020]; ATP binding [GO:0005524]; glutamate-tRNA ligase activity [GO:0004818]; GTPase binding [GO:0051020]; proline-tRNA ligase activity [GO:0004827]; RNA stem-loop binding [GO:0035613]; cellular r…	aminoacyl-tRNA synthetase multienzyme complex [GO:0017101]; cytoplasm [GO:0005737]; cytosol [GO:0005829]; GAIT complex [GO:0097452]; intracellular ribonucleoprotein complex [GO:0030529]; membrane [GO:0016020]; ATP binding [GO:0005524]; glutamate-tRNA ligase activity [GO:0004818]; GTPase binding [GO:0051020]; proline-tRNA ligase activity [GO:0004827]; RNA stem-loop binding [GO:0035613]; cellular r…	aminoacyl-tRNA synthetase multienzyme complex [GO:0017101]; cytoplasm [GO:0005737]; cytosol [GO:0005829]; GAIT complex [GO:0097452]; intracellular ribonucleoprotein complex [GO:0030529]; membrane [GO:0016020]; ATP binding [GO:0005524]; glutamate-tRNA ligase activity [GO:0004818]; GTPase binding [GO:0051020]; proline-tRNA ligase activity [GO:0004827]; RNA stem-loop binding [GO:0035613]; cellular r…	Catalyzes the attachment of the cognate amino acid to the corresponding tRNA in a two-step reaction: the amino acid is first activated by ATP to form a covalent intermediate with AMP and is then transferred to the acceptor end of the cognate tRNA. Component of the GAIT (gamma interferon-activated inhibitor of translation) complex which mediates interferon-gamma-induced transcript-selective transl…	170591	171
LEMD2_HUMAN	-0.0568046	0.0492595	LEMD2	LEMD2	LEM domain-containing protein 2	-2.09344	-1.80834	0.0840265	0.277193	0.341156	2.35568	20	0.0186794	0.00441773	0.00592052	503	integral component of nuclear inner membrane [GO:0005639]; membrane [GO:0016020]; nuclear membrane [GO:0031965]; chromatin DNA binding [GO:0031490]; heart formation [GO:0060914]; meiotic attachment of telomere to nuclear envelope [GO:0070197]; negative regulation of BMP signaling pathway [GO:0030514]; negative regulation of MAPK cascade [GO:0043409]; negative regulation of protein kinase B signal…	integral component of nuclear inner membrane [GO:0005639]; membrane [GO:0016020]; nuclear membrane [GO:0031965]; chromatin DNA binding [GO:0031490]; heart formation [GO:0060914]; meiotic attachment of telomere to nuclear envelope [GO:0070197]; negative regulation of BMP signaling pathway [GO:0030514]; negative regulation of MAPK cascade [GO:0043409]; negative regulation of protein kinase B signal…	integral component of nuclear inner membrane [GO:0005639]; membrane [GO:0016020]; nuclear membrane [GO:0031965]; chromatin DNA binding [GO:0031490]; heart formation [GO:0060914]; meiotic attachment of telomere to nuclear envelope [GO:0070197]; negative regulation of BMP signaling pathway [GO:0030514]; negative regulation of MAPK cascade [GO:0043409]; negative regulation of protein kinase B signal…	Involved in nuclear structure organization (PubMed:16339967). Required for maintaining the integrity of the nuclear envelope (PubMed:17097643). {ECO:0000269|PubMed:16339967, ECO:0000269|PubMed:17097643}.; Required for embryonic development and is involved in regulation of several signaling pathways such as MAPK and AKT. Required for myoblast differentiation involving regulation of ERK signaling (…	56975	57
HNRPK_HUMAN	-0.0569933	0.00156094	HNRNPK	HNRNPK HNRPK	Heterogeneous nuclear ribonucleoprotein K	-3.6585	-2.44096	0.0230116	0.112467	0.19953	2.35568	20	0.0186794	0.00145611	0.00327097	463	catalytic step 2 spliceosome [GO:0071013]; cell projection [GO:0042995]; cytoplasm [GO:0005737]; extracellular exosome [GO:0070062]; extracellular matrix [GO:0031012]; focal adhesion [GO:0005925]; membrane [GO:0016020]; nuclear chromatin [GO:0000790]; nucleoplasm [GO:0005654]; nucleus [GO:0005634]; podosome [GO:0002102]; cadherin binding [GO:0045296]; RNA binding [GO:0003723]; RNA polymerase II c…	catalytic step 2 spliceosome [GO:0071013]; cell projection [GO:0042995]; cytoplasm [GO:0005737]; extracellular exosome [GO:0070062]; extracellular matrix [GO:0031012]; focal adhesion [GO:0005925]; membrane [GO:0016020]; nuclear chromatin [GO:0000790]; nucleoplasm [GO:0005654]; nucleus [GO:0005634]; podosome [GO:0002102]; cadherin binding [GO:0045296]; RNA binding [GO:0003723]; RNA polymerase II c…	catalytic step 2 spliceosome [GO:0071013]; cell projection [GO:0042995]; cytoplasm [GO:0005737]; extracellular exosome [GO:0070062]; extracellular matrix [GO:0031012]; focal adhesion [GO:0005925]; membrane [GO:0016020]; nuclear chromatin [GO:0000790]; nucleoplasm [GO:0005654]; nucleus [GO:0005634]; podosome [GO:0002102]; cadherin binding [GO:0045296]; RNA binding [GO:0003723]; RNA polymerase II c…	One of the major pre-mRNA-binding proteins. Binds tenaciously to poly(C) sequences. Likely to play a role in the nuclear metabolism of hnRNAs, particularly for pre-mRNAs that contain cytidine-rich sequences. Can also bind poly(C) single-stranded DNA. Plays an important role in p53/TP53 response to DNA damage, acting at the level of both transcription activation and repression. When sumoylated, ac…	50976	51
OBSL1_HUMAN	-0.0571984	0.0215507	OBSL1	OBSL1 KIAA0657	Obscurin-like protein 1	-2.49305	-2.02357	0.0551294	0.193184	0.286882	2.35568	20	0.0186794	0.00315832	0.00479382	1896	3M complex [GO:1990393]; centrosome [GO:0005813]; cytoplasm [GO:0005737]; Golgi apparatus [GO:0005794]; intercalated disc [GO:0014704]; M band [GO:0031430]; muscle myosin complex [GO:0005859]; perinuclear region of cytoplasm [GO:0048471]; Z disc [GO:0030018]; actin filament binding [GO:0051015]; cytoskeletal adaptor activity [GO:0008093]; muscle alpha-actinin binding [GO:0051371]; structural cons…	3M complex [GO:1990393]; centrosome [GO:0005813]; cytoplasm [GO:0005737]; Golgi apparatus [GO:0005794]; intercalated disc [GO:0014704]; M band [GO:0031430]; muscle myosin complex [GO:0005859]; perinuclear region of cytoplasm [GO:0048471]; Z disc [GO:0030018]; actin filament binding [GO:0051015]; cytoskeletal adaptor activity [GO:0008093]; muscle alpha-actinin binding [GO:0051371]; structural cons…	3M complex [GO:1990393]; centrosome [GO:0005813]; cytoplasm [GO:0005737]; Golgi apparatus [GO:0005794]; intercalated disc [GO:0014704]; M band [GO:0031430]; muscle myosin complex [GO:0005859]; perinuclear region of cytoplasm [GO:0048471]; Z disc [GO:0030018]; actin filament binding [GO:0051015]; cytoskeletal adaptor activity [GO:0008093]; muscle alpha-actinin binding [GO:0051371]; structural cons…	Core component of the 3M complex, a complex required to regulate microtubule dynamics and genome integrity. It is unclear how the 3M complex regulates microtubules, it could act by controlling the level of a microtubule stabilizer (PubMed:24793695, PubMed:24793696). Acts as a regulator of the Cul7-RING(FBXW8) ubiquitin-protein ligase, playing a critical role in the ubiquitin ligase pathway that r…	206947	207
VATB2_HUMAN	-0.0580721	0.0395574	ATP6V1B2	ATP6V1B2 ATP6B2 VPP3	V-type proton ATPase subunit B, brain isoform	-2.20212	-1.88391	0.0726493	0.253881	0.320518	2.35568	20	0.0186794	0.00417257	0.0057012	511	cytosol [GO:0005829]; endomembrane system [GO:0012505]; extracellular exosome [GO:0070062]; integral component of membrane [GO:0016021]; intracellular membrane-bounded organelle [GO:0043231]; lysosomal membrane [GO:0005765]; melanosome [GO:0042470]; microvillus [GO:0005902]; myelin sheath [GO:0043209]; plasma membrane [GO:0005886]; proton-transporting V-type ATPase, V1 domain [GO:0033180]; ruffle…	cytosol [GO:0005829]; endomembrane system [GO:0012505]; extracellular exosome [GO:0070062]; integral component of membrane [GO:0016021]; intracellular membrane-bounded organelle [GO:0043231]; lysosomal membrane [GO:0005765]; melanosome [GO:0042470]; microvillus [GO:0005902]; myelin sheath [GO:0043209]; plasma membrane [GO:0005886]; proton-transporting V-type ATPase, V1 domain [GO:0033180]; ruffle…	cytosol [GO:0005829]; endomembrane system [GO:0012505]; extracellular exosome [GO:0070062]; integral component of membrane [GO:0016021]; intracellular membrane-bounded organelle [GO:0043231]; lysosomal membrane [GO:0005765]; melanosome [GO:0042470]; microvillus [GO:0005902]; myelin sheath [GO:0043209]; plasma membrane [GO:0005886]; proton-transporting V-type ATPase, V1 domain [GO:0033180]; ruffle…	Non-catalytic subunit of the peripheral V1 complex of vacuolar ATPase. V-ATPase is responsible for acidifying a variety of intracellular compartments in eukaryotic cells.	56501	57
CAC1S_HUMAN	-0.0586746	0.017013	CACNA1S	CACNA1S CACH1 CACN1 CACNL1A3	Voltage-dependent L-type calcium channel subunit alpha-1S	-2.60309	-2.09742	0.0474767	0.17674	0.271153	2.35568	20	0.0186794	0.00304841	0.00469549	1873	cytoplasm [GO:0005737]; I band [GO:0031674]; plasma membrane [GO:0005886]; T-tubule [GO:0030315]; voltage-gated calcium channel complex [GO:0005891]; high voltage-gated calcium channel activity [GO:0008331]; metal ion binding [GO:0046872]; voltage-gated calcium channel activity [GO:0005245]; calcium ion transport [GO:0006816]; cardiac conduction [GO:0061337]; membrane depolarization during action…	cytoplasm [GO:0005737]; I band [GO:0031674]; plasma membrane [GO:0005886]; T-tubule [GO:0030315]; voltage-gated calcium channel complex [GO:0005891]; high voltage-gated calcium channel activity [GO:0008331]; metal ion binding [GO:0046872]; voltage-gated calcium channel activity [GO:0005245]; calcium ion transport [GO:0006816]; cardiac conduction [GO:0061337]; membrane depolarization during action…	cytoplasm [GO:0005737]; I band [GO:0031674]; plasma membrane [GO:0005886]; T-tubule [GO:0030315]; voltage-gated calcium channel complex [GO:0005891]; high voltage-gated calcium channel activity [GO:0008331]; metal ion binding [GO:0046872]; voltage-gated calcium channel activity [GO:0005245]; calcium ion transport [GO:0006816]; cardiac conduction [GO:0061337]; membrane depolarization during action…	Pore-forming, alpha-1S subunit of the voltage-gated calcium channel that gives rise to L-type calcium currents in skeletal muscle. Calcium channels containing the alpha-1S subunit play an important role in excitation-contraction coupling in skeletal muscle via their interaction with RYR1, which triggers Ca(2+) release from the sarcplasmic reticulum and ultimately results in muscle contraction. Lo…	212350	212
G3BP1_HUMAN	-0.0592513	0.0464256	G3BP1	G3BP1 G3BP	Ras GTPase-activating protein-binding protein 1	-2.12301	-1.8508	0.0774571	0.271003	0.3287	2.35568	20	0.0186794	0.00467348	0.00614932	466	cytoplasmic stress granule [GO:0010494]; cytosol [GO:0005829]; focal adhesion [GO:0005925]; intracellular ribonucleoprotein complex [GO:0030529]; nucleus [GO:0005634]; plasma membrane [GO:0005886]; ATP binding [GO:0005524]; ATP-dependent DNA helicase activity [GO:0004003]; ATP-dependent RNA helicase activity [GO:0004004]; DNA binding [GO:0003677]; endonuclease activity [GO:0004519]; mRNA binding …	cytoplasmic stress granule [GO:0010494]; cytosol [GO:0005829]; focal adhesion [GO:0005925]; intracellular ribonucleoprotein complex [GO:0030529]; nucleus [GO:0005634]; plasma membrane [GO:0005886]; ATP binding [GO:0005524]; ATP-dependent DNA helicase activity [GO:0004003]; ATP-dependent RNA helicase activity [GO:0004004]; DNA binding [GO:0003677]; endonuclease activity [GO:0004519]; mRNA binding …	cytoplasmic stress granule [GO:0010494]; cytosol [GO:0005829]; focal adhesion [GO:0005925]; intracellular ribonucleoprotein complex [GO:0030529]; nucleus [GO:0005634]; plasma membrane [GO:0005886]; ATP binding [GO:0005524]; ATP-dependent DNA helicase activity [GO:0004003]; ATP-dependent RNA helicase activity [GO:0004004]; DNA binding [GO:0003677]; endonuclease activity [GO:0004519]; mRNA binding …	May be a regulated effector of stress granule assembly. Phosphorylation-dependent sequence-specific endoribonuclease in vitro. Cleaves exclusively between cytosine and adenine and cleaves MYC mRNA preferentially at the 3'-UTR. ATP- and magnesium-dependent helicase. Unwinds preferentially partial DNA and RNA duplexes having a 17 bp annealed portion and either a hanging 3' tail or hanging tails at …	52164	52
RLA0_HUMAN	-0.0600138	0.0304352	RPLP0	RPLP0	60S acidic ribosomal protein P0	-2.32933	-1.97655	0.0605577	0.225664	0.294109	2.35568	20	0.0186794	0.00398282	0.00553144	317	cytoplasm [GO:0005737]; cytoplasmic ribonucleoprotein granule [GO:0036464]; cytosol [GO:0005829]; cytosolic large ribosomal subunit [GO:0022625]; dendrite [GO:0030425]; endoplasmic reticulum [GO:0005783]; extracellular exosome [GO:0070062]; focal adhesion [GO:0005925]; intracellular ribonucleoprotein complex [GO:0030529]; membrane [GO:0016020]; nucleus [GO:0005634]; RNA binding [GO:0003723]; stru…	cytoplasm [GO:0005737]; cytoplasmic ribonucleoprotein granule [GO:0036464]; cytosol [GO:0005829]; cytosolic large ribosomal subunit [GO:0022625]; dendrite [GO:0030425]; endoplasmic reticulum [GO:0005783]; extracellular exosome [GO:0070062]; focal adhesion [GO:0005925]; intracellular ribonucleoprotein complex [GO:0030529]; membrane [GO:0016020]; nucleus [GO:0005634]; RNA binding [GO:0003723]; stru…	cytoplasm [GO:0005737]; cytoplasmic ribonucleoprotein granule [GO:0036464]; cytosol [GO:0005829]; cytosolic large ribosomal subunit [GO:0022625]; dendrite [GO:0030425]; endoplasmic reticulum [GO:0005783]; extracellular exosome [GO:0070062]; focal adhesion [GO:0005925]; intracellular ribonucleoprotein complex [GO:0030529]; membrane [GO:0016020]; nucleus [GO:0005634]; RNA binding [GO:0003723]; stru…	Ribosomal protein P0 is the functional equivalent of E.coli protein L10.	34274	34
SMC1A_HUMAN	-0.0600934	0.0288259	SMC1A	SMC1A DXS423E KIAA0178 SB1.8 SMC1 SMC1L1	Structural maintenance of chromosomes protein 1A	-2.35536	-1.99165	0.0587654	0.220163	0.291826	2.35568	20	0.0186794	0.00390561	0.00546236	1233	chromosome [GO:0005694]; chromosome, centromeric region [GO:0000775]; cohesin complex [GO:0008278]; condensed chromosome kinetochore [GO:0000777]; condensed nuclear chromosome [GO:0000794]; cytosol [GO:0005829]; kinetochore [GO:0000776]; meiotic cohesin complex [GO:0030893]; nucleoplasm [GO:0005654]; nucleus [GO:0005634]; ATP binding [GO:0005524]; chromatin binding [GO:0003682]; mediator complex …	chromosome [GO:0005694]; chromosome, centromeric region [GO:0000775]; cohesin complex [GO:0008278]; condensed chromosome kinetochore [GO:0000777]; condensed nuclear chromosome [GO:0000794]; cytosol [GO:0005829]; kinetochore [GO:0000776]; meiotic cohesin complex [GO:0030893]; nucleoplasm [GO:0005654]; nucleus [GO:0005634]; ATP binding [GO:0005524]; chromatin binding [GO:0003682]; mediator complex …	chromosome [GO:0005694]; chromosome, centromeric region [GO:0000775]; cohesin complex [GO:0008278]; condensed chromosome kinetochore [GO:0000777]; condensed nuclear chromosome [GO:0000794]; cytosol [GO:0005829]; kinetochore [GO:0000776]; meiotic cohesin complex [GO:0030893]; nucleoplasm [GO:0005654]; nucleus [GO:0005634]; ATP binding [GO:0005524]; chromatin binding [GO:0003682]; mediator complex …	Involved in chromosome cohesion during cell cycle and in DNA repair. Central component of cohesin complex. The cohesin complex is required for the cohesion of sister chromatids after DNA replication. The cohesin complex apparently forms a large proteinaceous ring within which sister chromatids can be trapped. At anaphase, the complex is cleaved and dissociates from chromatin, allowing sister chro…	143233	143
HNRPL_HUMAN	-0.0610888	0.0266882	HNRNPL	HNRNPL HNRPL P/OKcl.14	Heterogeneous nuclear ribonucleoprotein L	-2.39211	-2.02341	0.0551477	0.213479	0.286882	2.35568	20	0.0186794	0.00391301	0.00546899	589	cytosol [GO:0005829]; extracellular exosome [GO:0070062]; intracellular ribonucleoprotein complex [GO:0030529]; membrane [GO:0016020]; nucleoplasm [GO:0005654]; nucleus [GO:0005634]; perinuclear region of cytoplasm [GO:0048471]; pronucleus [GO:0045120]; ribonucleoprotein granule [GO:0035770]; mRNA 3'-UTR binding [GO:0003730]; mRNA CDS binding [GO:1990715]; pre-mRNA intronic binding [GO:0097157]; …	cytosol [GO:0005829]; extracellular exosome [GO:0070062]; intracellular ribonucleoprotein complex [GO:0030529]; membrane [GO:0016020]; nucleoplasm [GO:0005654]; nucleus [GO:0005634]; perinuclear region of cytoplasm [GO:0048471]; pronucleus [GO:0045120]; ribonucleoprotein granule [GO:0035770]; mRNA 3'-UTR binding [GO:0003730]; mRNA CDS binding [GO:1990715]; pre-mRNA intronic binding [GO:0097157]; …	cytosol [GO:0005829]; extracellular exosome [GO:0070062]; intracellular ribonucleoprotein complex [GO:0030529]; membrane [GO:0016020]; nucleoplasm [GO:0005654]; nucleus [GO:0005634]; perinuclear region of cytoplasm [GO:0048471]; pronucleus [GO:0045120]; ribonucleoprotein granule [GO:0035770]; mRNA 3'-UTR binding [GO:0003730]; mRNA CDS binding [GO:1990715]; pre-mRNA intronic binding [GO:0097157]; …	Splicing factor binding to exonic or intronic sites and acting as either an activator or repressor of exon inclusion. Exhibits a binding preference for CA-rich elements (PubMed:11809897, PubMed:22570490, PubMed:24164894, PubMed:25623890, PubMed:26051023). Component of the heterogeneous nuclear ribonucleoprotein (hnRNP) complexes and associated with most nascent transcripts (PubMed:2687284). Assoc…	64133	64
ITA7_HUMAN	-0.0615281	0.0175995	ITGA7	ITGA7 UNQ406/PRO768	Integrin alpha-7 [Cleaved into: Integrin alpha-7 heavy chain; Integrin alpha-7 light chain; Integrin alpha-7 70 kDa form]	-2.58741	-2.13062	0.044358	0.179039	0.264985	2.35568	20	0.0186794	0.00339288	0.00500366	1181	cell surface [GO:0009986]; integrin complex [GO:0008305]; plasma membrane [GO:0005886]; metal ion binding [GO:0046872]; cell-matrix adhesion [GO:0007160]; endodermal cell differentiation [GO:0035987]; extracellular matrix organization [GO:0030198]; heterotypic cell-cell adhesion [GO:0034113]; integrin-mediated signaling pathway [GO:0007229]; muscle organ development [GO:0007517]; regulation of ce…	cell surface [GO:0009986]; integrin complex [GO:0008305]; plasma membrane [GO:0005886]; metal ion binding [GO:0046872]; cell-matrix adhesion [GO:0007160]; endodermal cell differentiation [GO:0035987]; extracellular matrix organization [GO:0030198]; heterotypic cell-cell adhesion [GO:0034113]; integrin-mediated signaling pathway [GO:0007229]; muscle organ development [GO:0007517]; regulation of ce…	cell surface [GO:0009986]; integrin complex [GO:0008305]; plasma membrane [GO:0005886]; metal ion binding [GO:0046872]; cell-matrix adhesion [GO:0007160]; endodermal cell differentiation [GO:0035987]; extracellular matrix organization [GO:0030198]; heterotypic cell-cell adhesion [GO:0034113]; integrin-mediated signaling pathway [GO:0007229]; muscle organ development [GO:0007517]; regulation of ce…	Integrin alpha-7/beta-1 is the primary laminin receptor on skeletal myoblasts and adult myofibers. During myogenic differentiation, it may induce changes in the shape and mobility of myoblasts, and facilitate their localization at laminin-rich sites of secondary fiber formation. It is involved in the maintenance of the myofibers cytoarchitecture as well as for their anchorage, viability and funct…	128948	129
NONO_HUMAN	-0.0615674	0.0118587	NONO	NONO NRB54	Non-POU domain-containing octamer-binding protein	-2.7683	-2.21794	0.0370177	0.157076	0.242527	2.35568	20	0.0186794	0.00296775	0.00462333	471	membrane [GO:0016020]; nuclear matrix [GO:0016363]; nuclear speck [GO:0016607]; nucleolus [GO:0005730]; nucleoplasm [GO:0005654]; nucleus [GO:0005634]; paraspeckles [GO:0042382]; RNA polymerase II transcription factor complex [GO:0090575]; chromatin binding [GO:0003682]; core promoter binding [GO:0001047]; identical protein binding [GO:0042802]; RNA binding [GO:0003723]; RNA polymerase II distal …	membrane [GO:0016020]; nuclear matrix [GO:0016363]; nuclear speck [GO:0016607]; nucleolus [GO:0005730]; nucleoplasm [GO:0005654]; nucleus [GO:0005634]; paraspeckles [GO:0042382]; RNA polymerase II transcription factor complex [GO:0090575]; chromatin binding [GO:0003682]; core promoter binding [GO:0001047]; identical protein binding [GO:0042802]; RNA binding [GO:0003723]; RNA polymerase II distal …	membrane [GO:0016020]; nuclear matrix [GO:0016363]; nuclear speck [GO:0016607]; nucleolus [GO:0005730]; nucleoplasm [GO:0005654]; nucleus [GO:0005634]; paraspeckles [GO:0042382]; RNA polymerase II transcription factor complex [GO:0090575]; chromatin binding [GO:0003682]; core promoter binding [GO:0001047]; identical protein binding [GO:0042802]; RNA binding [GO:0003723]; RNA polymerase II distal …	DNA- and RNA binding protein, involved in several nuclear processes. Binds the conventional octamer sequence in double-stranded DNA. Also binds single-stranded DNA and RNA at a site independent of the duplex site. Involved in pre-mRNA splicing, probably as a heterodimer with SFPQ. Interacts with U5 snRNA, probably by binding to a purine-rich sequence located on the 3' side of U5 snRNA stem 1b. To…	54232	54
PCBP2_HUMAN	-0.0617356	0.0276775	PCBP2	PCBP2	Poly	-2.37478	-2.02151	0.0553578	0.215884	0.286882	2.35568	20	0.0186794	0.00405486	0.00559589	365	cytoplasm [GO:0005737]; cytosol [GO:0005829]; extracellular exosome [GO:0070062]; focal adhesion [GO:0005925]; intracellular ribonucleoprotein complex [GO:0030529]; membrane [GO:0016020]; nucleoplasm [GO:0005654]; nucleus [GO:0005634]; C-rich single-stranded DNA binding [GO:1990829]; enzyme binding [GO:0019899]; RNA binding [GO:0003723]; ubiquitin protein ligase binding [GO:0031625]; defense resp…	cytoplasm [GO:0005737]; cytosol [GO:0005829]; extracellular exosome [GO:0070062]; focal adhesion [GO:0005925]; intracellular ribonucleoprotein complex [GO:0030529]; membrane [GO:0016020]; nucleoplasm [GO:0005654]; nucleus [GO:0005634]; C-rich single-stranded DNA binding [GO:1990829]; enzyme binding [GO:0019899]; RNA binding [GO:0003723]; ubiquitin protein ligase binding [GO:0031625]; defense resp…	cytoplasm [GO:0005737]; cytosol [GO:0005829]; extracellular exosome [GO:0070062]; focal adhesion [GO:0005925]; intracellular ribonucleoprotein complex [GO:0030529]; membrane [GO:0016020]; nucleoplasm [GO:0005654]; nucleus [GO:0005634]; C-rich single-stranded DNA binding [GO:1990829]; enzyme binding [GO:0019899]; RNA binding [GO:0003723]; ubiquitin protein ligase binding [GO:0031625]; defense resp…	Single-stranded nucleic acid binding protein that binds preferentially to oligo dC. Major cellular poly(rC)-binding protein. Binds also poly(rU). Negatively regulates cellular antiviral responses mediated by MAVS signaling (PubMed:19881509). It acts as an adapter between MAVS and the E3 ubiquitin ligase ITCH, therefore triggering MAVS ubiquitination and degradation (PubMed:19881509). {ECO:0000269…	38580	39
U2AF2_HUMAN	-0.0626304	0.0469403	U2AF2	U2AF2 U2AF65	Splicing factor U2AF 65 kDa subunit	-2.11752	-1.87928	0.0733057	0.272386	0.321936	2.35568	20	0.0186794	0.00524886	0.00666408	475	commitment complex [GO:0000243]; nuclear speck [GO:0016607]; nucleoplasm [GO:0005654]; nucleus [GO:0005634]; spliceosomal complex [GO:0005681]; U2-type prespliceosome [GO:0071004]; U2AF [GO:0089701]; C2H2 zinc finger domain binding [GO:0070742]; enzyme binding [GO:0019899]; poly-pyrimidine tract binding [GO:0008187]; pre-mRNA 3'-splice site binding [GO:0030628]; RNA binding [GO:0003723]; mRNA 3'-…	commitment complex [GO:0000243]; nuclear speck [GO:0016607]; nucleoplasm [GO:0005654]; nucleus [GO:0005634]; spliceosomal complex [GO:0005681]; U2-type prespliceosome [GO:0071004]; U2AF [GO:0089701]; C2H2 zinc finger domain binding [GO:0070742]; enzyme binding [GO:0019899]; poly-pyrimidine tract binding [GO:0008187]; pre-mRNA 3'-splice site binding [GO:0030628]; RNA binding [GO:0003723]; mRNA 3'-…	commitment complex [GO:0000243]; nuclear speck [GO:0016607]; nucleoplasm [GO:0005654]; nucleus [GO:0005634]; spliceosomal complex [GO:0005681]; U2-type prespliceosome [GO:0071004]; U2AF [GO:0089701]; C2H2 zinc finger domain binding [GO:0070742]; enzyme binding [GO:0019899]; poly-pyrimidine tract binding [GO:0008187]; pre-mRNA 3'-splice site binding [GO:0030628]; RNA binding [GO:0003723]; mRNA 3'-…	Necessary for the splicing of pre-mRNA. By recruiting PRPF19 and the PRP19C/Prp19 complex/NTC/Nineteen complex to the RNA polymerase II C-terminal domain (CTD), and thereby pre-mRNA, may couple transcription to splicing (PubMed:21536736). Induces cardiac troponin-T (TNNT2) pre-mRNA exon inclusion in muscle. Regulates the TNNT2 exon 5 inclusion through competition with MBNL1. Binds preferentially …	53501	54
HNRL2_HUMAN	-0.0631503	0.0459876	HNRNPUL2	HNRNPUL2 HNRPUL2	Heterogeneous nuclear ribonucleoprotein U-like protein 2	-2.12773	-1.89026	0.0717572	0.270378	0.318627	2.35568	20	0.0186794	0.00528529	0.00669666	747	membrane [GO:0016020]; nucleoplasm [GO:0005654]; nucleus [GO:0005634]; RNA binding [GO:0003723]	membrane [GO:0016020]; nucleoplasm [GO:0005654]; nucleus [GO:0005634]; RNA binding [GO:0003723]	membrane [GO:0016020]; nucleoplasm [GO:0005654]; nucleus [GO:0005634]; RNA binding [GO:0003723]		85105	85
DDX17_HUMAN	-0.0635679	0.0205537	DDX17	DDX17	Probable ATP-dependent RNA helicase DDX17	-2.51522	-2.11954	0.0453773	0.188379	0.265468	2.35568	20	0.0186794	0.00383242	0.00539689	729	cytosol [GO:0005829]; membrane [GO:0016020]; nuclear speck [GO:0016607]; nucleolus [GO:0005730]; nucleus [GO:0005634]; ATP binding [GO:0005524]; ATP-dependent RNA helicase activity [GO:0004004]; estrogen receptor binding [GO:0030331]; RNA binding [GO:0003723]; RNA helicase activity [GO:0003724]; RNA-dependent ATPase activity [GO:0008186]; transcription coactivator activity [GO:0003713]; alternati…	cytosol [GO:0005829]; membrane [GO:0016020]; nuclear speck [GO:0016607]; nucleolus [GO:0005730]; nucleus [GO:0005634]; ATP binding [GO:0005524]; ATP-dependent RNA helicase activity [GO:0004004]; estrogen receptor binding [GO:0030331]; RNA binding [GO:0003723]; RNA helicase activity [GO:0003724]; RNA-dependent ATPase activity [GO:0008186]; transcription coactivator activity [GO:0003713]; alternati…	cytosol [GO:0005829]; membrane [GO:0016020]; nuclear speck [GO:0016607]; nucleolus [GO:0005730]; nucleus [GO:0005634]; ATP binding [GO:0005524]; ATP-dependent RNA helicase activity [GO:0004004]; estrogen receptor binding [GO:0030331]; RNA binding [GO:0003723]; RNA helicase activity [GO:0003724]; RNA-dependent ATPase activity [GO:0008186]; transcription coactivator activity [GO:0003713]; alternati…	As an RNA helicase, unwinds RNA and alters RNA structures through ATP binding and hydrolysis. Involved in multiple cellular processes, including pre-mRNA splicing, alternative splicing, ribosomal RNA processing and miRNA processing, as well as transcription regulation. Regulates the alternative splicing of exons exhibiting specific features (PubMed:12138182, PubMed:23022728, PubMed:24910439, PubM…	80272	80
HNRL1_HUMAN	-0.0636228	0.00799252	HNRNPUL1	HNRNPUL1 E1BAP5 HNRPUL1	Heterogeneous nuclear ribonucleoprotein U-like protein 1	-2.94577	-2.33038	0.0291957	0.140973	0.21941	2.35568	20	0.0186794	0.00279886	0.00447223	856	intracellular ribonucleoprotein complex [GO:0030529]; nucleoplasm [GO:0005654]; nucleus [GO:0005634]; enzyme binding [GO:0019899]; RNA binding [GO:0003723]; mRNA splicing, via spliceosome [GO:0000398]; regulation of transcription, DNA-templated [GO:0006355]; response to virus [GO:0009615]; RNA processing [GO:0006396]; transcription, DNA-templated [GO:0006351]	intracellular ribonucleoprotein complex [GO:0030529]; nucleoplasm [GO:0005654]; nucleus [GO:0005634]; enzyme binding [GO:0019899]; RNA binding [GO:0003723]; mRNA splicing, via spliceosome [GO:0000398]; regulation of transcription, DNA-templated [GO:0006355]; response to virus [GO:0009615]; RNA processing [GO:0006396]; transcription, DNA-templated [GO:0006351]	intracellular ribonucleoprotein complex [GO:0030529]; nucleoplasm [GO:0005654]; nucleus [GO:0005634]; enzyme binding [GO:0019899]; RNA binding [GO:0003723]; mRNA splicing, via spliceosome [GO:0000398]; regulation of transcription, DNA-templated [GO:0006355]; response to virus [GO:0009615]; RNA processing [GO:0006396]; transcription, DNA-templated [GO:0006351]	Acts as a basic transcriptional regulator. Represses basic transcription driven by several virus and cellular promoters. When associated with BRD7, activates transcription of glucocorticoid-responsive promoter in the absence of ligand-stimulation. Plays also a role in mRNA processing and transport. Binds avidly to poly(G) and poly(C) RNA homopolymers in vitro. {ECO:0000269|PubMed:12489984, ECO:00…	95739	96
PDIA1_HUMAN	-0.0636712	0.0302327	P4HB	P4HB ERBA2L PDI PDIA1 PO4DB	Protein disulfide-isomerase	-2.33254	-2.01886	0.0556534	0.22461	0.286882	2.35568	20	0.0186794	0.00447076	0.00596796	508	endoplasmic reticulum [GO:0005783]; endoplasmic reticulum chaperone complex [GO:0034663]; endoplasmic reticulum lumen [GO:0005788]; endoplasmic reticulum-Golgi intermediate compartment [GO:0005793]; external side of plasma membrane [GO:0009897]; extracellular exosome [GO:0070062]; extracellular matrix [GO:0031012]; extracellular region [GO:0005576]; focal adhesion [GO:0005925]; melanosome [GO:004…	endoplasmic reticulum [GO:0005783]; endoplasmic reticulum chaperone complex [GO:0034663]; endoplasmic reticulum lumen [GO:0005788]; endoplasmic reticulum-Golgi intermediate compartment [GO:0005793]; external side of plasma membrane [GO:0009897]; extracellular exosome [GO:0070062]; extracellular matrix [GO:0031012]; extracellular region [GO:0005576]; focal adhesion [GO:0005925]; melanosome [GO:004…	endoplasmic reticulum [GO:0005783]; endoplasmic reticulum chaperone complex [GO:0034663]; endoplasmic reticulum lumen [GO:0005788]; endoplasmic reticulum-Golgi intermediate compartment [GO:0005793]; external side of plasma membrane [GO:0009897]; extracellular exosome [GO:0070062]; extracellular matrix [GO:0031012]; extracellular region [GO:0005576]; focal adhesion [GO:0005925]; melanosome [GO:004…	This multifunctional protein catalyzes the formation, breakage and rearrangement of disulfide bonds. At the cell surface, seems to act as a reductase that cleaves disulfide bonds of proteins attached to the cell. May therefore cause structural modifications of exofacial proteins. Inside the cell, seems to form/rearrange disulfide bonds of nascent proteins. At high concentrations, functions as a c…	57116	57
KAP0_HUMAN	-0.0642749	0.0357834	PRKAR1A	PRKAR1A PKR1 PRKAR1 TSE1	cAMP-dependent protein kinase type I-alpha regulatory subunit	-2.2511	-1.97661	0.0605498	0.242014	0.294109	2.35568	20	0.0186794	0.00489154	0.00634441	381	cAMP-dependent protein kinase complex [GO:0005952]; ciliary base [GO:0097546]; cytoplasm [GO:0005737]; cytosol [GO:0005829]; membrane [GO:0016020]; neuromuscular junction [GO:0031594]; nucleotide-activated protein kinase complex [GO:0031588]; plasma membrane raft [GO:0044853]; protein complex [GO:0043234]; cAMP binding [GO:0030552]; cAMP-dependent protein kinase inhibitor activity [GO:0004862]; c…	cAMP-dependent protein kinase complex [GO:0005952]; ciliary base [GO:0097546]; cytoplasm [GO:0005737]; cytosol [GO:0005829]; membrane [GO:0016020]; neuromuscular junction [GO:0031594]; nucleotide-activated protein kinase complex [GO:0031588]; plasma membrane raft [GO:0044853]; protein complex [GO:0043234]; cAMP binding [GO:0030552]; cAMP-dependent protein kinase inhibitor activity [GO:0004862]; c…	cAMP-dependent protein kinase complex [GO:0005952]; ciliary base [GO:0097546]; cytoplasm [GO:0005737]; cytosol [GO:0005829]; membrane [GO:0016020]; neuromuscular junction [GO:0031594]; nucleotide-activated protein kinase complex [GO:0031588]; plasma membrane raft [GO:0044853]; protein complex [GO:0043234]; cAMP binding [GO:0030552]; cAMP-dependent protein kinase inhibitor activity [GO:0004862]; c…	Regulatory subunit of the cAMP-dependent protein kinases involved in cAMP signaling in cells. {ECO:0000269|PubMed:16491121, ECO:0000269|PubMed:20215566, ECO:0000269|PubMed:26405036}.	42982	43
SRRT_HUMAN	-0.0644161	0.0338942	SRRT	SRRT ARS2 ASR2	Serrate RNA effector molecule homolog	-2.27742	-1.99385	0.058508	0.236411	0.291826	2.35568	20	0.0186794	0.00480013	0.00626263	876	cytoplasm [GO:0005737]; nucleoplasm [GO:0005654]; protein complex [GO:0043234]; DNA binding [GO:0003677]; RNA binding [GO:0003723]; cell proliferation [GO:0008283]; mRNA splicing, via spliceosome [GO:0000398]; neuronal stem cell population maintenance [GO:0097150]; positive regulation of neurogenesis [GO:0050769]; primary miRNA processing [GO:0031053]; regulation of transcription, DNA-templated […	cytoplasm [GO:0005737]; nucleoplasm [GO:0005654]; protein complex [GO:0043234]; DNA binding [GO:0003677]; RNA binding [GO:0003723]; cell proliferation [GO:0008283]; mRNA splicing, via spliceosome [GO:0000398]; neuronal stem cell population maintenance [GO:0097150]; positive regulation of neurogenesis [GO:0050769]; primary miRNA processing [GO:0031053]; regulation of transcription, DNA-templated […	cytoplasm [GO:0005737]; nucleoplasm [GO:0005654]; protein complex [GO:0043234]; DNA binding [GO:0003677]; RNA binding [GO:0003723]; cell proliferation [GO:0008283]; mRNA splicing, via spliceosome [GO:0000398]; neuronal stem cell population maintenance [GO:0097150]; positive regulation of neurogenesis [GO:0050769]; primary miRNA processing [GO:0031053]; regulation of transcription, DNA-templated […	Acts as a mediator between the cap-binding complex (CBC) and the primary microRNAs (miRNAs) processing machinery during cell proliferation. Contributes to the stability and delivery of capped primary miRNA transcripts to the primary miRNA processing complex containing DGCR8 and DROSHA, thereby playing a role in RNA-mediated gene silencing (RNAi) by miRNAs. Binds capped RNAs (m7GpppG-capped RNA); …	100666	101
PURA_HUMAN	-0.0645068	0.00438444	PURA	PURA PUR1	Transcriptional activator protein Pur-alpha	-3.21103	-2.45734	0.0222066	0.124992	0.195963	2.35568	20	0.0186794	0.00242144	0.00413459	322	cytoplasm [GO:0005737]; dendrite [GO:0030425]; DNA replication factor A complex [GO:0005662]; neuronal cell body [GO:0043025]; nuclear chromosome, telomeric region [GO:0000784]; nucleus [GO:0005634]; double-stranded telomeric DNA binding [GO:0003691]; purine-rich negative regulatory element binding [GO:0032422]; RNA binding [GO:0003723]; single-stranded DNA binding [GO:0003697]; SMAD binding [GO:…	cytoplasm [GO:0005737]; dendrite [GO:0030425]; DNA replication factor A complex [GO:0005662]; neuronal cell body [GO:0043025]; nuclear chromosome, telomeric region [GO:0000784]; nucleus [GO:0005634]; double-stranded telomeric DNA binding [GO:0003691]; purine-rich negative regulatory element binding [GO:0032422]; RNA binding [GO:0003723]; single-stranded DNA binding [GO:0003697]; SMAD binding [GO:…	cytoplasm [GO:0005737]; dendrite [GO:0030425]; DNA replication factor A complex [GO:0005662]; neuronal cell body [GO:0043025]; nuclear chromosome, telomeric region [GO:0000784]; nucleus [GO:0005634]; double-stranded telomeric DNA binding [GO:0003691]; purine-rich negative regulatory element binding [GO:0032422]; RNA binding [GO:0003723]; single-stranded DNA binding [GO:0003697]; SMAD binding [GO:…	This is a probable transcription activator that specifically binds the purine-rich single strand of the PUR element located upstream of the MYC gene. May play a role in the initiation of DNA replication and in recombination.	34911	35
CUTC_HUMAN	-0.0648766	0.0464845	CUTC	CUTC CGI-32	Copper homeostasis protein cutC homolog	-2.12238	-1.90158	0.0701912	0.271025	0.316347	2.35568	20	0.0186794	0.00560634	0.00698388	273	cytoplasm [GO:0005737]; cytosol [GO:0005829]; nucleolus [GO:0005730]; nucleoplasm [GO:0005654]; nucleus [GO:0005634]; copper ion binding [GO:0005507]; copper ion homeostasis [GO:0055070]; copper ion transport [GO:0006825]; protein tetramerization [GO:0051262]	cytoplasm [GO:0005737]; cytosol [GO:0005829]; nucleolus [GO:0005730]; nucleoplasm [GO:0005654]; nucleus [GO:0005634]; copper ion binding [GO:0005507]; copper ion homeostasis [GO:0055070]; copper ion transport [GO:0006825]; protein tetramerization [GO:0051262]	cytoplasm [GO:0005737]; cytosol [GO:0005829]; nucleolus [GO:0005730]; nucleoplasm [GO:0005654]; nucleus [GO:0005634]; copper ion binding [GO:0005507]; copper ion homeostasis [GO:0055070]; copper ion transport [GO:0006825]; protein tetramerization [GO:0051262]	May play a role in copper homeostasis. Can bind one Cu(1+) per subunit. {ECO:0000269|PubMed:16182249, ECO:0000269|PubMed:19878721}.	29341	29
NB5R3_HUMAN	-0.0652697	0.0434851	CYB5R3	CYB5R3 DIA1	NADH-cytochrome b5 reductase 3	-2.15548	-1.92608	0.0669052	0.263318	0.310192	2.35568	20	0.0186794	0.00550155	0.00689014	301	azurophil granule lumen [GO:0035578]; cytoplasm [GO:0005737]; endoplasmic reticulum [GO:0005783]; endoplasmic reticulum membrane [GO:0005789]; extracellular exosome [GO:0070062]; extracellular region [GO:0005576]; hemoglobin complex [GO:0005833]; lipid particle [GO:0005811]; membrane [GO:0016020]; mitochondrial inner membrane [GO:0005743]; mitochondrial outer membrane [GO:0005741]; mitochondrion …	azurophil granule lumen [GO:0035578]; cytoplasm [GO:0005737]; endoplasmic reticulum [GO:0005783]; endoplasmic reticulum membrane [GO:0005789]; extracellular exosome [GO:0070062]; extracellular region [GO:0005576]; hemoglobin complex [GO:0005833]; lipid particle [GO:0005811]; membrane [GO:0016020]; mitochondrial inner membrane [GO:0005743]; mitochondrial outer membrane [GO:0005741]; mitochondrion …	azurophil granule lumen [GO:0035578]; cytoplasm [GO:0005737]; endoplasmic reticulum [GO:0005783]; endoplasmic reticulum membrane [GO:0005789]; extracellular exosome [GO:0070062]; extracellular region [GO:0005576]; hemoglobin complex [GO:0005833]; lipid particle [GO:0005811]; membrane [GO:0016020]; mitochondrial inner membrane [GO:0005743]; mitochondrial outer membrane [GO:0005741]; mitochondrion …	Desaturation and elongation of fatty acids, cholesterol biosynthesis, drug metabolism, and, in erythrocyte, methemoglobin reduction.	34235	34
DNJC3_HUMAN	-0.0657082	0.0449025	DNAJC3	DNAJC3 P58IPK PRKRI	DnaJ homolog subfamily C member 3	-2.13959	-1.91951	0.0677722	0.267066	0.311577	2.35568	20	0.0186794	0.00565885	0.00703086	504	azurophil granule lumen [GO:0035578]; cytoplasm [GO:0005737]; cytosol [GO:0005829]; endoplasmic reticulum [GO:0005783]; endoplasmic reticulum lumen [GO:0005788]; endoplasmic reticulum Sec complex [GO:0031205]; extracellular exosome [GO:0070062]; extracellular region [GO:0005576]; extracellular vesicle [GO:1903561]; membrane [GO:0016020]; smooth endoplasmic reticulum [GO:0005790]; chaperone bindin…	azurophil granule lumen [GO:0035578]; cytoplasm [GO:0005737]; cytosol [GO:0005829]; endoplasmic reticulum [GO:0005783]; endoplasmic reticulum lumen [GO:0005788]; endoplasmic reticulum Sec complex [GO:0031205]; extracellular exosome [GO:0070062]; extracellular region [GO:0005576]; extracellular vesicle [GO:1903561]; membrane [GO:0016020]; smooth endoplasmic reticulum [GO:0005790]; chaperone bindin…	azurophil granule lumen [GO:0035578]; cytoplasm [GO:0005737]; cytosol [GO:0005829]; endoplasmic reticulum [GO:0005783]; endoplasmic reticulum lumen [GO:0005788]; endoplasmic reticulum Sec complex [GO:0031205]; extracellular exosome [GO:0070062]; extracellular region [GO:0005576]; extracellular vesicle [GO:1903561]; membrane [GO:0016020]; smooth endoplasmic reticulum [GO:0005790]; chaperone bindin…	Involved in the unfolded protein response (UPR) during endoplasmic reticulum (ER) stress. Acts as a negative regulator of the EIF2AK4/GCN2 kinase activity by preventing the phosphorylation of eIF-2-alpha at 'Ser-52' and hence attenuating general protein synthesis under ER stress, hypothermic and amino acid starving stress conditions (By similarity). Co-chaperone of HSPA8/HSC70, it stimulates its …	57580	58
HNRPU_HUMAN	-0.0659375	0.0262548	HNRNPU	HNRNPU HNRPU SAFA U21.1	Heterogeneous nuclear ribonucleoprotein U	-2.39989	-2.0816	0.0490308	0.213243	0.274664	2.35568	20	0.0186794	0.00452932	0.00602035	825	catalytic step 2 spliceosome [GO:0071013]; cell surface [GO:0009986]; CRD-mediated mRNA stability complex [GO:0070937]; cytoplasmic ribonucleoprotein granule [GO:0036464]; extracellular matrix [GO:0031012]; intracellular ribonucleoprotein complex [GO:0030529]; membrane [GO:0016020]; nucleoplasm [GO:0005654]; nucleus [GO:0005634]; ATP binding [GO:0005524]; core promoter binding [GO:0001047]; DNA b…	catalytic step 2 spliceosome [GO:0071013]; cell surface [GO:0009986]; CRD-mediated mRNA stability complex [GO:0070937]; cytoplasmic ribonucleoprotein granule [GO:0036464]; extracellular matrix [GO:0031012]; intracellular ribonucleoprotein complex [GO:0030529]; membrane [GO:0016020]; nucleoplasm [GO:0005654]; nucleus [GO:0005634]; ATP binding [GO:0005524]; core promoter binding [GO:0001047]; DNA b…	catalytic step 2 spliceosome [GO:0071013]; cell surface [GO:0009986]; CRD-mediated mRNA stability complex [GO:0070937]; cytoplasmic ribonucleoprotein granule [GO:0036464]; extracellular matrix [GO:0031012]; intracellular ribonucleoprotein complex [GO:0030529]; membrane [GO:0016020]; nucleoplasm [GO:0005654]; nucleus [GO:0005634]; ATP binding [GO:0005524]; core promoter binding [GO:0001047]; DNA b…	Component of the CRD-mediated complex that promotes MYC mRNA stabilization. Binds to pre-mRNA. Has high affinity for scaffold-attached region (SAR) DNA. Binds to double- and single-stranded DNA and RNA. Plays a role in the circadian regulation of the core clock component ARNTL/BMAL1 transcription (By similarity). {ECO:0000250|UniProtKB:Q8VEK3, ECO:0000269|PubMed:19029303}.	90584	91
SRSF1_HUMAN	-0.0659529	0.0228243	SRSF1	SRSF1 ASF SF2 SF2P33 SFRS1 OK/SW-cl.3	Serine/arginine-rich splicing factor 1	-2.46609	-2.11989	0.0453446	0.19935	0.265468	2.35568	20	0.0186794	0.00429142	0.00580753	248	catalytic step 2 spliceosome [GO:0071013]; cytoplasm [GO:0005737]; extracellular exosome [GO:0070062]; nuclear speck [GO:0016607]; nucleoplasm [GO:0005654]; nucleus [GO:0005634]; DNA topoisomerase binding [GO:0044547]; mRNA binding [GO:0003729]; protein kinase B binding [GO:0043422]; RNA binding [GO:0003723]; RS domain binding [GO:0050733]; alternative mRNA splicing, via spliceosome [GO:0000380];…	catalytic step 2 spliceosome [GO:0071013]; cytoplasm [GO:0005737]; extracellular exosome [GO:0070062]; nuclear speck [GO:0016607]; nucleoplasm [GO:0005654]; nucleus [GO:0005634]; DNA topoisomerase binding [GO:0044547]; mRNA binding [GO:0003729]; protein kinase B binding [GO:0043422]; RNA binding [GO:0003723]; RS domain binding [GO:0050733]; alternative mRNA splicing, via spliceosome [GO:0000380];…	catalytic step 2 spliceosome [GO:0071013]; cytoplasm [GO:0005737]; extracellular exosome [GO:0070062]; nuclear speck [GO:0016607]; nucleoplasm [GO:0005654]; nucleus [GO:0005634]; DNA topoisomerase binding [GO:0044547]; mRNA binding [GO:0003729]; protein kinase B binding [GO:0043422]; RNA binding [GO:0003723]; RS domain binding [GO:0050733]; alternative mRNA splicing, via spliceosome [GO:0000380];…	Plays a role in preventing exon skipping, ensuring the accuracy of splicing and regulating alternative splicing. Interacts with other spliceosomal components, via the RS domains, to form a bridge between the 5'- and 3'-splice site binding components, U1 snRNP and U2AF. Can stimulate binding of U1 snRNP to a 5'-splice site-containing pre-mRNA. Binds to purine-rich RNA sequences, either the octamer…	27745	28
IF4G1_HUMAN	-0.0663603	0.0470861	EIF4G1	EIF4G1 EIF4F EIF4G EIF4GI	Eukaryotic translation initiation factor 4 gamma 1	-2.11598	-1.90934	0.0691358	0.27254	0.314836	2.35568	20	0.0186794	0.00590127	0.00724773	1599	cytoplasm [GO:0005737]; cytosol [GO:0005829]; eukaryotic translation initiation factor 4F complex [GO:0016281]; membrane [GO:0016020]; nucleus [GO:0005634]; polysome [GO:0005844]; ATP binding [GO:0005524]; cadherin binding [GO:0045296]; eukaryotic initiation factor 4E binding [GO:0008190]; mRNA binding [GO:0003729]; protein complex scaffold [GO:0032947]; RNA binding [GO:0003723]; translation fact…	cytoplasm [GO:0005737]; cytosol [GO:0005829]; eukaryotic translation initiation factor 4F complex [GO:0016281]; membrane [GO:0016020]; nucleus [GO:0005634]; polysome [GO:0005844]; ATP binding [GO:0005524]; cadherin binding [GO:0045296]; eukaryotic initiation factor 4E binding [GO:0008190]; mRNA binding [GO:0003729]; protein complex scaffold [GO:0032947]; RNA binding [GO:0003723]; translation fact…	cytoplasm [GO:0005737]; cytosol [GO:0005829]; eukaryotic translation initiation factor 4F complex [GO:0016281]; membrane [GO:0016020]; nucleus [GO:0005634]; polysome [GO:0005844]; ATP binding [GO:0005524]; cadherin binding [GO:0045296]; eukaryotic initiation factor 4E binding [GO:0008190]; mRNA binding [GO:0003729]; protein complex scaffold [GO:0032947]; RNA binding [GO:0003723]; translation fact…	Component of the protein complex eIF4F, which is involved in the recognition of the mRNA cap, ATP-dependent unwinding of 5'-terminal secondary structure and recruitment of mRNA to the ribosome.	175491	175
SC16A_HUMAN	-0.0671721	0.0377074	SEC16A	SEC16A KIAA0310 SEC16 SEC16L	Protein transport protein Sec16A	-2.22557	-1.98684	0.0593306	0.24818	0.292331	2.35568	20	0.0186794	0.00546573	0.00685809	2179	cytosol [GO:0005829]; endoplasmic reticulum [GO:0005783]; endoplasmic reticulum membrane [GO:0005789]; Golgi apparatus [GO:0005794]; Golgi membrane [GO:0000139]; COPII vesicle coating [GO:0048208]; endoplasmic reticulum organization [GO:0007029]; protein transport [GO:0015031]; substantia nigra development [GO:0021762]	cytosol [GO:0005829]; endoplasmic reticulum [GO:0005783]; endoplasmic reticulum membrane [GO:0005789]; Golgi apparatus [GO:0005794]; Golgi membrane [GO:0000139]; COPII vesicle coating [GO:0048208]; endoplasmic reticulum organization [GO:0007029]; protein transport [GO:0015031]; substantia nigra development [GO:0021762]	cytosol [GO:0005829]; endoplasmic reticulum [GO:0005783]; endoplasmic reticulum membrane [GO:0005789]; Golgi apparatus [GO:0005794]; Golgi membrane [GO:0000139]; COPII vesicle coating [GO:0048208]; endoplasmic reticulum organization [GO:0007029]; protein transport [GO:0015031]; substantia nigra development [GO:0021762]	Defines endoplasmic reticulum exit sites (ERES) and is required for secretory cargo traffic from the endoplasmic reticulum to the Golgi apparatus. SAR1A-GTP-dependent assembly of SEC16A on the ER membrane forms an organized scaffold defining an ERES. Required for normal transitional endoplasmic reticulum (tER) organization. {ECO:0000269|PubMed:17005010, ECO:0000269|PubMed:17192411}.	233517	234
RPB7_HUMAN	-0.0674089	0.0461347	POLR2G	POLR2G RPB7	DNA-directed RNA polymerase II subunit RPB7	-2.12614	-1.92414	0.0671592	0.270572	0.310192	2.35568	20	0.0186794	0.00603116	0.00736394	172	DNA-directed RNA polymerase II, core complex [GO:0005665]; nucleoplasm [GO:0005654]; nucleus [GO:0005634]; P-body [GO:0000932]; DNA-directed 5'-3' RNA polymerase activity [GO:0003899]; single-stranded DNA binding [GO:0003697]; single-stranded RNA binding [GO:0003727]; translation initiation factor binding [GO:0031369]; 7-methylguanosine mRNA capping [GO:0006370]; apoptotic process [GO:0006915]; f…	DNA-directed RNA polymerase II, core complex [GO:0005665]; nucleoplasm [GO:0005654]; nucleus [GO:0005634]; P-body [GO:0000932]; DNA-directed 5'-3' RNA polymerase activity [GO:0003899]; single-stranded DNA binding [GO:0003697]; single-stranded RNA binding [GO:0003727]; translation initiation factor binding [GO:0031369]; 7-methylguanosine mRNA capping [GO:0006370]; apoptotic process [GO:0006915]; f…	DNA-directed RNA polymerase II, core complex [GO:0005665]; nucleoplasm [GO:0005654]; nucleus [GO:0005634]; P-body [GO:0000932]; DNA-directed 5'-3' RNA polymerase activity [GO:0003899]; single-stranded DNA binding [GO:0003697]; single-stranded RNA binding [GO:0003727]; translation initiation factor binding [GO:0031369]; 7-methylguanosine mRNA capping [GO:0006370]; apoptotic process [GO:0006915]; f…	DNA-dependent RNA polymerase catalyzes the transcription of DNA into RNA using the four ribonucleoside triphosphates as substrates. Component of RNA polymerase II which synthesizes mRNA precursors and many functional non-coding RNAs. Pol II is the central component of the basal RNA polymerase II transcription machinery. It is composed of mobile elements that move relative to each other. RPB7 is p…	19294	19
TOIP1_HUMAN	-0.0675749	0.032393	TOR1AIP1	TOR1AIP1 LAP1	Torsin-1A-interacting protein 1	-2.29932	-2.03676	0.0536868	0.232992	0.285535	2.35568	20	0.0186794	0.0051823	0.00660453	583	integral component of membrane [GO:0016021]; nuclear inner membrane [GO:0005637]; nuclear membrane [GO:0031965]; nucleus [GO:0005634]; ATPase activator activity [GO:0001671]; ATPase binding [GO:0051117]; cytoskeletal protein binding [GO:0008092]; lamin binding [GO:0005521]; nuclear membrane organization [GO:0071763]; positive regulation of ATPase activity [GO:0032781]; protein localization to nuc…	integral component of membrane [GO:0016021]; nuclear inner membrane [GO:0005637]; nuclear membrane [GO:0031965]; nucleus [GO:0005634]; ATPase activator activity [GO:0001671]; ATPase binding [GO:0051117]; cytoskeletal protein binding [GO:0008092]; lamin binding [GO:0005521]; nuclear membrane organization [GO:0071763]; positive regulation of ATPase activity [GO:0032781]; protein localization to nuc…	integral component of membrane [GO:0016021]; nuclear inner membrane [GO:0005637]; nuclear membrane [GO:0031965]; nucleus [GO:0005634]; ATPase activator activity [GO:0001671]; ATPase binding [GO:0051117]; cytoskeletal protein binding [GO:0008092]; lamin binding [GO:0005521]; nuclear membrane organization [GO:0071763]; positive regulation of ATPase activity [GO:0032781]; protein localization to nuc…	Required for nuclear membrane integrity. Induces TOR1A and TOR1B ATPase activity and is required for their location on the nuclear membrane. Binds to A- and B-type lamins. Possible role in membrane attachment and assembly of the nuclear lamina. {ECO:0000269|PubMed:23569223}.	66248	66
SGCD_HUMAN	-0.0691621	0.0150919	SGCD	SGCD	Delta-sarcoglycan	-2.65828	-2.26349	0.0336432	0.169998	0.23306	2.35568	20	0.0186794	0.00406151	0.00560184	289	cytoplasm [GO:0005737]; cytoskeleton [GO:0005856]; dystrophin-associated glycoprotein complex [GO:0016010]; integral component of membrane [GO:0016021]; plasma membrane [GO:0005886]; sarcoglycan complex [GO:0016012]; sarcolemma [GO:0042383]; cardiac muscle tissue development [GO:0048738]; heart contraction [GO:0060047]; membrane organization [GO:0061024]; muscle cell development [GO:0055001]; mus…	cytoplasm [GO:0005737]; cytoskeleton [GO:0005856]; dystrophin-associated glycoprotein complex [GO:0016010]; integral component of membrane [GO:0016021]; plasma membrane [GO:0005886]; sarcoglycan complex [GO:0016012]; sarcolemma [GO:0042383]; cardiac muscle tissue development [GO:0048738]; heart contraction [GO:0060047]; membrane organization [GO:0061024]; muscle cell development [GO:0055001]; mus…	cytoplasm [GO:0005737]; cytoskeleton [GO:0005856]; dystrophin-associated glycoprotein complex [GO:0016010]; integral component of membrane [GO:0016021]; plasma membrane [GO:0005886]; sarcoglycan complex [GO:0016012]; sarcolemma [GO:0042383]; cardiac muscle tissue development [GO:0048738]; heart contraction [GO:0060047]; membrane organization [GO:0061024]; muscle cell development [GO:0055001]; mus…	Component of the sarcoglycan complex, a subcomplex of the dystrophin-glycoprotein complex which forms a link between the F-actin cytoskeleton and the extracellular matrix.	32071	32
IMDH2_HUMAN	-0.0698973	0.00716772	IMPDH2	IMPDH2 IMPD2	Inosine-5'-monophosphate dehydrogenase 2	-2.99427	-2.44756	0.0226841	0.138863	0.197575	2.35568	20	0.0186794	0.00326957	0.00489334	514	cytoplasm [GO:0005737]; cytosol [GO:0005829]; extracellular exosome [GO:0070062]; extracellular region [GO:0005576]; ficolin-1-rich granule lumen [GO:1904813]; membrane [GO:0016020]; nucleus [GO:0005634]; peroxisomal membrane [GO:0005778]; secretory granule lumen [GO:0034774]; DNA binding [GO:0003677]; IMP dehydrogenase activity [GO:0003938]; metal ion binding [GO:0046872]; nucleotide binding [GO…	cytoplasm [GO:0005737]; cytosol [GO:0005829]; extracellular exosome [GO:0070062]; extracellular region [GO:0005576]; ficolin-1-rich granule lumen [GO:1904813]; membrane [GO:0016020]; nucleus [GO:0005634]; peroxisomal membrane [GO:0005778]; secretory granule lumen [GO:0034774]; DNA binding [GO:0003677]; IMP dehydrogenase activity [GO:0003938]; metal ion binding [GO:0046872]; nucleotide binding [GO…	cytoplasm [GO:0005737]; cytosol [GO:0005829]; extracellular exosome [GO:0070062]; extracellular region [GO:0005576]; ficolin-1-rich granule lumen [GO:1904813]; membrane [GO:0016020]; nucleus [GO:0005634]; peroxisomal membrane [GO:0005778]; secretory granule lumen [GO:0034774]; DNA binding [GO:0003677]; IMP dehydrogenase activity [GO:0003938]; metal ion binding [GO:0046872]; nucleotide binding [GO…	Catalyzes the conversion of inosine 5'-phosphate (IMP) to xanthosine 5'-phosphate (XMP), the first committed and rate-limiting step in the de novo synthesis of guanine nucleotides, and therefore plays an important role in the regulation of cell growth. Could also have a single-stranded nucleic acid-binding activity and could play a role in RNA and/or DNA metabolism. It may also have a role in the…	55805	56
PRP19_HUMAN	-0.0700547	0.00539853	PRPF19	PRPF19 NMP200 PRP19 SNEV	Pre-mRNA-processing factor 19	-3.11966	-2.50968	0.0198053	0.131969	0.186749	2.35568	20	0.0186794	0.00302559	0.00467507	504	catalytic step 2 spliceosome [GO:0071013]; cytoplasm [GO:0005737]; lipid particle [GO:0005811]; membrane [GO:0016020]; nuclear speck [GO:0016607]; nucleoplasm [GO:0005654]; nucleus [GO:0005634]; Prp19 complex [GO:0000974]; site of double-strand break [GO:0035861]; spindle [GO:0005819]; U2-type catalytic step 1 spliceosome [GO:0071006]; identical protein binding [GO:0042802]; ubiquitin protein lig…	catalytic step 2 spliceosome [GO:0071013]; cytoplasm [GO:0005737]; lipid particle [GO:0005811]; membrane [GO:0016020]; nuclear speck [GO:0016607]; nucleoplasm [GO:0005654]; nucleus [GO:0005634]; Prp19 complex [GO:0000974]; site of double-strand break [GO:0035861]; spindle [GO:0005819]; U2-type catalytic step 1 spliceosome [GO:0071006]; identical protein binding [GO:0042802]; ubiquitin protein lig…	catalytic step 2 spliceosome [GO:0071013]; cytoplasm [GO:0005737]; lipid particle [GO:0005811]; membrane [GO:0016020]; nuclear speck [GO:0016607]; nucleoplasm [GO:0005654]; nucleus [GO:0005634]; Prp19 complex [GO:0000974]; site of double-strand break [GO:0035861]; spindle [GO:0005819]; U2-type catalytic step 1 spliceosome [GO:0071006]; identical protein binding [GO:0042802]; ubiquitin protein lig…	Ubiquitin-protein ligase which is a core component of several complexes mainly involved pre-mRNA splicing and DNA repair. Core component of the PRP19C/Prp19 complex/NTC/Nineteen complex which is part of the spliceosome and participates in its assembly, its remodeling and is required for its activity. During assembly of the spliceosome, mediates 'Lys-63'-linked polyubiquitination of the U4 spliceo…	55181	55
RAE1L_HUMAN	-0.070388	0.0451066	RAE1	RAE1 MRNP41	mRNA export factor	-2.13734	-1.95348	0.06339	0.267066	0.300136	2.35568	20	0.0186794	0.00650731	0.00778992	368	cytoplasm [GO:0005737]; fibrillar center [GO:0001650]; nuclear envelope [GO:0005635]; nuclear pore [GO:0005643]; nucleus [GO:0005634]; microtubule binding [GO:0008017]; RNA binding [GO:0003723]; cellular response to organic cyclic compound [GO:0071407]; gene silencing by RNA [GO:0031047]; intracellular transport of virus [GO:0075733]; mitotic nuclear envelope disassembly [GO:0007077]; mRNA export…	cytoplasm [GO:0005737]; fibrillar center [GO:0001650]; nuclear envelope [GO:0005635]; nuclear pore [GO:0005643]; nucleus [GO:0005634]; microtubule binding [GO:0008017]; RNA binding [GO:0003723]; cellular response to organic cyclic compound [GO:0071407]; gene silencing by RNA [GO:0031047]; intracellular transport of virus [GO:0075733]; mitotic nuclear envelope disassembly [GO:0007077]; mRNA export…	cytoplasm [GO:0005737]; fibrillar center [GO:0001650]; nuclear envelope [GO:0005635]; nuclear pore [GO:0005643]; nucleus [GO:0005634]; microtubule binding [GO:0008017]; RNA binding [GO:0003723]; cellular response to organic cyclic compound [GO:0071407]; gene silencing by RNA [GO:0031047]; intracellular transport of virus [GO:0075733]; mitotic nuclear envelope disassembly [GO:0007077]; mRNA export…	Binds mRNA. May function in nucleocytoplasmic transport and in directly or indirectly attaching cytoplasmic mRNPs to the cytoskeleton.	40968	41
G3BP2_HUMAN	-0.0713477	0.0308985	G3BP2	G3BP2 KIAA0660	Ras GTPase-activating protein-binding protein 2	-2.32207	-2.08351	0.0488407	0.227831	0.274664	2.35568	20	0.0186794	0.00566449	0.0070359	482	cytoplasm [GO:0005737]; cytosol [GO:0005829]; intracellular ribonucleoprotein complex [GO:0030529]; mRNA binding [GO:0003729]; receptor signaling complex scaffold activity [GO:0030159]; RNA binding [GO:0003723]; cytoplasmic sequestering of NF-kappaB [GO:0007253]; mRNA transport [GO:0051028]; Ras protein signal transduction [GO:0007265]; stress granule assembly [GO:0034063]	cytoplasm [GO:0005737]; cytosol [GO:0005829]; intracellular ribonucleoprotein complex [GO:0030529]; mRNA binding [GO:0003729]; receptor signaling complex scaffold activity [GO:0030159]; RNA binding [GO:0003723]; cytoplasmic sequestering of NF-kappaB [GO:0007253]; mRNA transport [GO:0051028]; Ras protein signal transduction [GO:0007265]; stress granule assembly [GO:0034063]	cytoplasm [GO:0005737]; cytosol [GO:0005829]; intracellular ribonucleoprotein complex [GO:0030529]; mRNA binding [GO:0003729]; receptor signaling complex scaffold activity [GO:0030159]; RNA binding [GO:0003723]; cytoplasmic sequestering of NF-kappaB [GO:0007253]; mRNA transport [GO:0051028]; Ras protein signal transduction [GO:0007265]; stress granule assembly [GO:0034063]	Probable scaffold protein that may be involved in mRNA transport. {ECO:0000305}.	54121	54
SYNEM_HUMAN	-0.0714818	0.0373899	SYNM	SYNM DMN KIAA0353 SYN	Synemin	-2.2297	-2.02381	0.0551028	0.24818	0.286882	2.35568	20	0.0186794	0.00616667	0.00748517	1565	adherens junction [GO:0005912]; costamere [GO:0043034]; intermediate filament [GO:0005882]; intermediate filament cytoskeleton [GO:0045111]; neurofilament cytoskeleton [GO:0060053]; sarcolemma [GO:0042383]; intermediate filament binding [GO:0019215]; structural constituent of cytoskeleton [GO:0005200]; structural constituent of muscle [GO:0008307]; vinculin binding [GO:0017166]; fast-twitch skele…	adherens junction [GO:0005912]; costamere [GO:0043034]; intermediate filament [GO:0005882]; intermediate filament cytoskeleton [GO:0045111]; neurofilament cytoskeleton [GO:0060053]; sarcolemma [GO:0042383]; intermediate filament binding [GO:0019215]; structural constituent of cytoskeleton [GO:0005200]; structural constituent of muscle [GO:0008307]; vinculin binding [GO:0017166]; fast-twitch skele…	adherens junction [GO:0005912]; costamere [GO:0043034]; intermediate filament [GO:0005882]; intermediate filament cytoskeleton [GO:0045111]; neurofilament cytoskeleton [GO:0060053]; sarcolemma [GO:0042383]; intermediate filament binding [GO:0019215]; structural constituent of cytoskeleton [GO:0005200]; structural constituent of muscle [GO:0008307]; vinculin binding [GO:0017166]; fast-twitch skele…	Type-VI intermediate filament (IF) which plays an important cytoskeletal role within the muscle cell cytoskeleton. It forms heteropolymeric IFs with desmin and/or vimentin, and via its interaction with cytoskeletal proteins alpha-dystrobrevin, dystrophin, talin-1, utrophin and vinculin, is able to link these heteropolymeric IFs to adherens-type junctions, such as to the costameres, neuromuscular …	172768	173
GRB2_HUMAN	-0.0716642	0.0244505	GRB2	GRB2 ASH	Growth factor receptor-bound protein 2	-2.43363	-2.15701	0.0420117	0.205705	0.258681	2.35568	20	0.0186794	0.00520291	0.00662297	217	cell-cell junction [GO:0005911]; COP9 signalosome [GO:0008180]; cytoplasm [GO:0005737]; cytosol [GO:0005829]; endosome [GO:0005768]; extracellular exosome [GO:0070062]; extrinsic component of cytoplasmic side of plasma membrane [GO:0031234]; Golgi apparatus [GO:0005794]; Grb2-EGFR complex [GO:0070436]; nucleolus [GO:0005730]; nucleoplasm [GO:0005654]; nucleus [GO:0005634]; plasma membrane [GO:000…	cell-cell junction [GO:0005911]; COP9 signalosome [GO:0008180]; cytoplasm [GO:0005737]; cytosol [GO:0005829]; endosome [GO:0005768]; extracellular exosome [GO:0070062]; extrinsic component of cytoplasmic side of plasma membrane [GO:0031234]; Golgi apparatus [GO:0005794]; Grb2-EGFR complex [GO:0070436]; nucleolus [GO:0005730]; nucleoplasm [GO:0005654]; nucleus [GO:0005634]; plasma membrane [GO:000…	cell-cell junction [GO:0005911]; COP9 signalosome [GO:0008180]; cytoplasm [GO:0005737]; cytosol [GO:0005829]; endosome [GO:0005768]; extracellular exosome [GO:0070062]; extrinsic component of cytoplasmic side of plasma membrane [GO:0031234]; Golgi apparatus [GO:0005794]; Grb2-EGFR complex [GO:0070436]; nucleolus [GO:0005730]; nucleoplasm [GO:0005654]; nucleus [GO:0005634]; plasma membrane [GO:000…	Adapter protein that provides a critical link between cell surface growth factor receptors and the Ras signaling pathway.; Isoform 2 does not bind to phosphorylated epidermal growth factor receptor (EGFR) but inhibits EGF-induced transactivation of a RAS-responsive element. Isoform 2 acts as a dominant negative protein over GRB2 and by suppressing proliferative signals, may trigger active program…	25206	25
KLC1_HUMAN	-0.0717258	0.0462414	KLC1	KLC1 KLC KNS2	Kinesin light chain 1	-2.12499	-1.95409	0.0633134	0.270572	0.300136	2.35568	20	0.0186794	0.00683577	0.00808377	573	axon [GO:0030424]; cytoplasmic vesicle [GO:0031410]; cytosol [GO:0005829]; growth cone [GO:0030426]; kinesin complex [GO:0005871]; membrane [GO:0016020]; microtubule [GO:0005874]; neuronal cell body [GO:0043025]; microtubule motor activity [GO:0003777]; motor activity [GO:0003774]; tubulin binding [GO:0015631]; antigen processing and presentation of exogenous peptide antigen via MHC class II [GO:…	axon [GO:0030424]; cytoplasmic vesicle [GO:0031410]; cytosol [GO:0005829]; growth cone [GO:0030426]; kinesin complex [GO:0005871]; membrane [GO:0016020]; microtubule [GO:0005874]; neuronal cell body [GO:0043025]; microtubule motor activity [GO:0003777]; motor activity [GO:0003774]; tubulin binding [GO:0015631]; antigen processing and presentation of exogenous peptide antigen via MHC class II [GO:…	axon [GO:0030424]; cytoplasmic vesicle [GO:0031410]; cytosol [GO:0005829]; growth cone [GO:0030426]; kinesin complex [GO:0005871]; membrane [GO:0016020]; microtubule [GO:0005874]; neuronal cell body [GO:0043025]; microtubule motor activity [GO:0003777]; motor activity [GO:0003774]; tubulin binding [GO:0015631]; antigen processing and presentation of exogenous peptide antigen via MHC class II [GO:…	Kinesin is a microtubule-associated force-producing protein that may play a role in organelle transport. The light chain may function in coupling of cargo to the heavy chain or in the modulation of its ATPase activity.	65310	65
AGO3_HUMAN	-0.0719162	0.0211187	AGO3	AGO3 EIF2C3	Protein argonaute-3	-2.50254	-2.20177	0.0382871	0.190356	0.2476	2.35568	20	0.0186794	0.00495499	0.00640117	860	condensed nuclear chromosome [GO:0000794]; cytoplasm [GO:0005737]; cytosol [GO:0005829]; membrane [GO:0016020]; micro-ribonucleoprotein complex [GO:0035068]; nucleoplasm [GO:0005654]; P-body [GO:0000932]; RISC complex [GO:0016442]; RISC-loading complex [GO:0070578]; double-stranded RNA binding [GO:0003725]; miRNA binding [GO:0035198]; RNA binding [GO:0003723]; single-stranded RNA binding [GO:0003…	condensed nuclear chromosome [GO:0000794]; cytoplasm [GO:0005737]; cytosol [GO:0005829]; membrane [GO:0016020]; micro-ribonucleoprotein complex [GO:0035068]; nucleoplasm [GO:0005654]; P-body [GO:0000932]; RISC complex [GO:0016442]; RISC-loading complex [GO:0070578]; double-stranded RNA binding [GO:0003725]; miRNA binding [GO:0035198]; RNA binding [GO:0003723]; single-stranded RNA binding [GO:0003…	condensed nuclear chromosome [GO:0000794]; cytoplasm [GO:0005737]; cytosol [GO:0005829]; membrane [GO:0016020]; micro-ribonucleoprotein complex [GO:0035068]; nucleoplasm [GO:0005654]; P-body [GO:0000932]; RISC complex [GO:0016442]; RISC-loading complex [GO:0070578]; double-stranded RNA binding [GO:0003725]; miRNA binding [GO:0035198]; RNA binding [GO:0003723]; single-stranded RNA binding [GO:0003…	Required for RNA-mediated gene silencing (RNAi). Binds to short RNAs such as microRNAs (miRNAs) and represses the translation of mRNAs which are complementary to them. Lacks endonuclease activity and does not appear to cleave target mRNAs. Proposed to be involved in stabilization of small RNA derivates (riRNA) derived from processed RNA polymerase III-transcribed Alu repeats containing a DR2 reti…	97360	97
VAPA_HUMAN	-0.0720681	0.0467459	VAPA	VAPA VAP33	Vesicle-associated membrane protein-associated protein A	-2.11959	-1.95257	0.0635034	0.271815	0.30018	2.35568	20	0.0186794	0.00693639	0.00817378	249	azurophil granule membrane [GO:0035577]; bicellular tight junction [GO:0005923]; endoplasmic reticulum [GO:0005783]; endoplasmic reticulum membrane [GO:0005789]; Golgi membrane [GO:0000139]; integral component of membrane [GO:0016021]; microtubule cytoskeleton [GO:0015630]; nuclear membrane [GO:0031965]; plasma membrane [GO:0005886]; vesicle [GO:0031982]; cadherin binding [GO:0045296]; FFAT motif…	azurophil granule membrane [GO:0035577]; bicellular tight junction [GO:0005923]; endoplasmic reticulum [GO:0005783]; endoplasmic reticulum membrane [GO:0005789]; Golgi membrane [GO:0000139]; integral component of membrane [GO:0016021]; microtubule cytoskeleton [GO:0015630]; nuclear membrane [GO:0031965]; plasma membrane [GO:0005886]; vesicle [GO:0031982]; cadherin binding [GO:0045296]; FFAT motif…	azurophil granule membrane [GO:0035577]; bicellular tight junction [GO:0005923]; endoplasmic reticulum [GO:0005783]; endoplasmic reticulum membrane [GO:0005789]; Golgi membrane [GO:0000139]; integral component of membrane [GO:0016021]; microtubule cytoskeleton [GO:0015630]; nuclear membrane [GO:0031965]; plasma membrane [GO:0005886]; vesicle [GO:0031982]; cadherin binding [GO:0045296]; FFAT motif…	Binds to OSBPL3, which mediates recruitment of VAPA to plasma membrane sites (PubMed:25447204). The ORP3-VAPA complex stimulates RRAS signaling which in turn attenuates integrin beta-1 (ITGB1) activation at the cell surface (PubMed:25447204). With OSBPL3, may regulate ER morphology (PubMed:16143324). May play a role in vesicle trafficking (PubMed:11511104, PubMed:19289470). {ECO:0000269|PubMed:11…	27893	28
NOP58_HUMAN	-0.0722497	0.0199752	NOP58	NOP58 NOL5 NOP5 HSPC120	Nucleolar protein 58	-2.52856	-2.22074	0.0368013	0.187278	0.242329	2.35568	20	0.0186794	0.00489867	0.00635078	529	box C/D snoRNP complex [GO:0031428]; Cajal body [GO:0015030]; cytosol [GO:0005829]; fibrillar center [GO:0001650]; membrane [GO:0016020]; nucleolus [GO:0005730]; nucleoplasm [GO:0005654]; nucleus [GO:0005634]; pre-snoRNP complex [GO:0070761]; small nucleolar ribonucleoprotein complex [GO:0005732]; small-subunit processome [GO:0032040]; ATPase binding [GO:0051117]; RNA binding [GO:0003723]; snoRNA…	box C/D snoRNP complex [GO:0031428]; Cajal body [GO:0015030]; cytosol [GO:0005829]; fibrillar center [GO:0001650]; membrane [GO:0016020]; nucleolus [GO:0005730]; nucleoplasm [GO:0005654]; nucleus [GO:0005634]; pre-snoRNP complex [GO:0070761]; small nucleolar ribonucleoprotein complex [GO:0005732]; small-subunit processome [GO:0032040]; ATPase binding [GO:0051117]; RNA binding [GO:0003723]; snoRNA…	box C/D snoRNP complex [GO:0031428]; Cajal body [GO:0015030]; cytosol [GO:0005829]; fibrillar center [GO:0001650]; membrane [GO:0016020]; nucleolus [GO:0005730]; nucleoplasm [GO:0005654]; nucleus [GO:0005634]; pre-snoRNP complex [GO:0070761]; small nucleolar ribonucleoprotein complex [GO:0005732]; small-subunit processome [GO:0032040]; ATPase binding [GO:0051117]; RNA binding [GO:0003723]; snoRNA…	Required for 60S ribosomal subunit biogenesis (By similarity). Core component of box C/D small nucleolar ribonucleoprotein (snoRNP) particles. Required for the biogenesis of box C/D snoRNAs such as U3, U8 and U14 snoRNAs. {ECO:0000250, ECO:0000269|PubMed:15574333, ECO:0000269|PubMed:17636026, ECO:0000269|PubMed:19620283}.	59578	60
ATE1_HUMAN	-0.0723883	0.0450789	ATE1	ATE1	Arginyl-tRNA--protein transferase 1	-2.13765	-1.96728	0.0616817	0.267066	0.295685	2.35568	20	0.0186794	0.00688044	0.00812373	518	cytoplasm [GO:0005737]; nucleus [GO:0005634]; arginyltransferase activity [GO:0004057]; protein arginylation [GO:0016598]	cytoplasm [GO:0005737]; nucleus [GO:0005634]; arginyltransferase activity [GO:0004057]; protein arginylation [GO:0016598]	cytoplasm [GO:0005737]; nucleus [GO:0005634]; arginyltransferase activity [GO:0004057]; protein arginylation [GO:0016598]	Involved in the post-translational conjugation of arginine to the N-terminal aspartate or glutamate of a protein. This arginylation is required for degradation of the protein via the ubiquitin pathway. Does not arginylate cysteine residues (By similarity). {ECO:0000250}.	59090	59
ASPH_HUMAN	-0.0724476	0.0386395	ASPH	ASPH BAH	Aspartyl/asparaginyl beta-hydroxylase	-2.21362	-2.02	0.055526	0.251613	0.286882	2.35568	20	0.0186794	0.00642674	0.00771784	758	calcium channel complex [GO:0034704]; cell [GO:0005623]; cortical endoplasmic reticulum [GO:0032541]; endoplasmic reticulum [GO:0005783]; endoplasmic reticulum membrane [GO:0005789]; integral component of endoplasmic reticulum membrane [GO:0030176]; integral component of membrane [GO:0016021]; junctional sarcoplasmic reticulum membrane [GO:0014701]; plasma membrane [GO:0005886]; sarcoplasmic reti…	calcium channel complex [GO:0034704]; cell [GO:0005623]; cortical endoplasmic reticulum [GO:0032541]; endoplasmic reticulum [GO:0005783]; endoplasmic reticulum membrane [GO:0005789]; integral component of endoplasmic reticulum membrane [GO:0030176]; integral component of membrane [GO:0016021]; junctional sarcoplasmic reticulum membrane [GO:0014701]; plasma membrane [GO:0005886]; sarcoplasmic reti…	calcium channel complex [GO:0034704]; cell [GO:0005623]; cortical endoplasmic reticulum [GO:0032541]; endoplasmic reticulum [GO:0005783]; endoplasmic reticulum membrane [GO:0005789]; integral component of endoplasmic reticulum membrane [GO:0030176]; integral component of membrane [GO:0016021]; junctional sarcoplasmic reticulum membrane [GO:0014701]; plasma membrane [GO:0005886]; sarcoplasmic reti…	Isoform 1: specifically hydroxylates an Asp or Asn residue in certain epidermal growth factor-like (EGF) domains of a number of proteins. {ECO:0000269|PubMed:11773073}.; Isoform 8: membrane-bound Ca(2+)-sensing protein, which is a structural component of the ER-plasma membrane junctions. Isoform 8 regulates the activity of Ca(+2) released-activated Ca(+2) (CRAC) channels in T-cells. {ECO:0000269|…	85863	86
FHOD1_HUMAN	-0.0728344	0.025669	FHOD1	FHOD1 FHOS FHOS1	FH1/FH2 domain-containing protein 1	-2.4106	-2.15269	0.042388	0.211538	0.260332	2.35568	20	0.0186794	0.00547738	0.00686851	1164	bleb [GO:0032059]; cytoplasm [GO:0005737]; cytoskeleton [GO:0005856]; cytosol [GO:0005829]; intercalated disc [GO:0014704]; membrane [GO:0016020]; nucleus [GO:0005634]; actin binding [GO:0003779]; identical protein binding [GO:0042802]; protein domain specific binding [GO:0019904]; protein self-association [GO:0043621]; establishment of centrosome localization [GO:0051660]; nuclear migration [GO:…	bleb [GO:0032059]; cytoplasm [GO:0005737]; cytoskeleton [GO:0005856]; cytosol [GO:0005829]; intercalated disc [GO:0014704]; membrane [GO:0016020]; nucleus [GO:0005634]; actin binding [GO:0003779]; identical protein binding [GO:0042802]; protein domain specific binding [GO:0019904]; protein self-association [GO:0043621]; establishment of centrosome localization [GO:0051660]; nuclear migration [GO:…	bleb [GO:0032059]; cytoplasm [GO:0005737]; cytoskeleton [GO:0005856]; cytosol [GO:0005829]; intercalated disc [GO:0014704]; membrane [GO:0016020]; nucleus [GO:0005634]; actin binding [GO:0003779]; identical protein binding [GO:0042802]; protein domain specific binding [GO:0019904]; protein self-association [GO:0043621]; establishment of centrosome localization [GO:0051660]; nuclear migration [GO:…	Required for the assembly of F-actin structures, such as stress fibers. Depends on the Rho-ROCK cascade for its activity. Contributes to the coordination of microtubules with actin fibers and plays a role in cell elongation. Acts synergistically with ROCK1 to promote SRC-dependent non-apoptotic plasma membrane blebbing. {ECO:0000269|PubMed:14576350, ECO:0000269|PubMed:15878344, ECO:0000269|PubMed…	126551	127
NU133_HUMAN	-0.0734262	0.00186466	NUP133	NUP133	Nuclear pore complex protein Nup133	-3.582	-2.76742	0.0111339	0.112467	0.151959	2.35568	20	0.0186794	0.00252117	0.0042238	1156	condensed chromosome kinetochore [GO:0000777]; cytosol [GO:0005829]; membrane [GO:0016020]; nuclear envelope [GO:0005635]; nuclear membrane [GO:0031965]; nuclear pore [GO:0005643]; nuclear pore outer ring [GO:0031080]; nucleocytoplasmic transporter activity [GO:0005487]; structural constituent of nuclear pore [GO:0017056]; chromatin organization [GO:0006325]; gene silencing by RNA [GO:0031047]; i…	condensed chromosome kinetochore [GO:0000777]; cytosol [GO:0005829]; membrane [GO:0016020]; nuclear envelope [GO:0005635]; nuclear membrane [GO:0031965]; nuclear pore [GO:0005643]; nuclear pore outer ring [GO:0031080]; nucleocytoplasmic transporter activity [GO:0005487]; structural constituent of nuclear pore [GO:0017056]; chromatin organization [GO:0006325]; gene silencing by RNA [GO:0031047]; i…	condensed chromosome kinetochore [GO:0000777]; cytosol [GO:0005829]; membrane [GO:0016020]; nuclear envelope [GO:0005635]; nuclear membrane [GO:0031965]; nuclear pore [GO:0005643]; nuclear pore outer ring [GO:0031080]; nucleocytoplasmic transporter activity [GO:0005487]; structural constituent of nuclear pore [GO:0017056]; chromatin organization [GO:0006325]; gene silencing by RNA [GO:0031047]; i…	Involved in poly(A)+ RNA transport. {ECO:0000269|PubMed:11684705}.	128979	129
MATR3_HUMAN	-0.0737694	0.0359316	MATR3	MATR3 KIAA0723	Matrin-3	-2.24909	-2.0535	0.0519039	0.242348	0.281716	2.35568	20	0.0186794	0.00645492	0.00774305	847	membrane [GO:0016020]; nuclear inner membrane [GO:0005637]; nuclear matrix [GO:0016363]; RNA binding [GO:0003723]; structural molecule activity [GO:0005198]; zinc ion binding [GO:0008270]; posttranscriptional regulation of gene expression [GO:0010608]	membrane [GO:0016020]; nuclear inner membrane [GO:0005637]; nuclear matrix [GO:0016363]; RNA binding [GO:0003723]; structural molecule activity [GO:0005198]; zinc ion binding [GO:0008270]; posttranscriptional regulation of gene expression [GO:0010608]	membrane [GO:0016020]; nuclear inner membrane [GO:0005637]; nuclear matrix [GO:0016363]; RNA binding [GO:0003723]; structural molecule activity [GO:0005198]; zinc ion binding [GO:0008270]; posttranscriptional regulation of gene expression [GO:0010608]	May play a role in transcription or may interact with other nuclear matrix proteins to form the internal fibrogranular network. In association with the SFPQ-NONO heteromer may play a role in nuclear retention of defective RNAs. {ECO:0000269|PubMed:11525732}.	94623	95
CAPR1_HUMAN	-0.0750277	0.0248716	CAPRIN1	CAPRIN1 GPIAP1 GPIP137 M11S1 RNG105	Caprin-1	-2.42555	-2.18042	0.0400247	0.20776	0.252923	2.35568	20	0.0186794	0.0057408	0.00710418	709	cytoplasmic stress granule [GO:0010494]; cytosol [GO:0005829]; dendrite [GO:0030425]; integral component of plasma membrane [GO:0005887]; membrane [GO:0016020]; P-body [GO:0000932]; RNA binding [GO:0003723]; negative regulation of translation [GO:0017148]; positive regulation of dendrite morphogenesis [GO:0050775]; positive regulation of dendritic spine morphogenesis [GO:0061003]	cytoplasmic stress granule [GO:0010494]; cytosol [GO:0005829]; dendrite [GO:0030425]; integral component of plasma membrane [GO:0005887]; membrane [GO:0016020]; P-body [GO:0000932]; RNA binding [GO:0003723]; negative regulation of translation [GO:0017148]; positive regulation of dendrite morphogenesis [GO:0050775]; positive regulation of dendritic spine morphogenesis [GO:0061003]	cytoplasmic stress granule [GO:0010494]; cytosol [GO:0005829]; dendrite [GO:0030425]; integral component of plasma membrane [GO:0005887]; membrane [GO:0016020]; P-body [GO:0000932]; RNA binding [GO:0003723]; negative regulation of translation [GO:0017148]; positive regulation of dendrite morphogenesis [GO:0050775]; positive regulation of dendritic spine morphogenesis [GO:0061003]	May regulate the transport and translation of mRNAs of proteins involved in synaptic plasticity in neurons and cell proliferation and migration in multiple cell types. {ECO:0000250, ECO:0000269|PubMed:17210633}.	78366	78
ABLM2_HUMAN	-0.0751484	0.0173793	ABLIM2	ABLIM2 KIAA1808	Actin-binding LIM protein 2	-2.59324	-2.28741	0.0319861	0.179028	0.229237	2.35568	20	0.0186794	0.00503856	0.00647594	611	actin cytoskeleton [GO:0015629]; cytoplasm [GO:0005737]; actin binding [GO:0003779]; zinc ion binding [GO:0008270]; actin cytoskeleton organization [GO:0030036]; transcription, DNA-templated [GO:0006351]	actin cytoskeleton [GO:0015629]; cytoplasm [GO:0005737]; actin binding [GO:0003779]; zinc ion binding [GO:0008270]; actin cytoskeleton organization [GO:0030036]; transcription, DNA-templated [GO:0006351]	actin cytoskeleton [GO:0015629]; cytoplasm [GO:0005737]; actin binding [GO:0003779]; zinc ion binding [GO:0008270]; actin cytoskeleton organization [GO:0030036]; transcription, DNA-templated [GO:0006351]	May act as scaffold protein. May stimulate ABRA activity and ABRA-dependent SRF transcriptional activity. {ECO:0000269|PubMed:17194709}.	67812	68
DENR_HUMAN	-0.0752051	0.0403839	DENR	DENR DRP1 H14	Density-regulated protein	-2.19196	-2.02361	0.0551252	0.256126	0.286882	2.35568	20	0.0186794	0.00706282	0.00828689	198	translation initiation complex [GO:0070992]; mRNA binding [GO:0003729]; ribosome binding [GO:0043022]; translation initiation factor activity [GO:0003743]; formation of translation preinitiation complex [GO:0001731]; IRES-dependent translational initiation [GO:0002192]; ribosome disassembly [GO:0032790]; translation reinitiation [GO:0002188]	translation initiation complex [GO:0070992]; mRNA binding [GO:0003729]; ribosome binding [GO:0043022]; translation initiation factor activity [GO:0003743]; formation of translation preinitiation complex [GO:0001731]; IRES-dependent translational initiation [GO:0002192]; ribosome disassembly [GO:0032790]; translation reinitiation [GO:0002188]	translation initiation complex [GO:0070992]; mRNA binding [GO:0003729]; ribosome binding [GO:0043022]; translation initiation factor activity [GO:0003743]; formation of translation preinitiation complex [GO:0001731]; IRES-dependent translational initiation [GO:0002192]; ribosome disassembly [GO:0032790]; translation reinitiation [GO:0002188]	May be involved in the translation of target mRNAs by scanning and recognition of the initiation codon. Involved in translation initiation; promotes recruitmnet of aminoacetyled initiator tRNA to P site of 40S ribosomes. Can promote release of deacylated tRNA and mRNA from recycled 40S subunits following ABCE1-mediated dissociation of post-termination ribosomal complexes into subunits. Plays a ro…	22092	22
RS2_HUMAN	-0.0760229	0.00678568	RPS2	RPS2 RPS4	40S ribosomal protein S2	-3.01859	-2.54047	0.0185084	0.138863	0.182388	2.35568	20	0.0186794	0.00380567	0.00537295	293	cytosol [GO:0005829]; cytosolic small ribosomal subunit [GO:0022627]; extracellular exosome [GO:0070062]; focal adhesion [GO:0005925]; membrane [GO:0016020]; nucleoplasm [GO:0005654]; nucleus [GO:0005634]; cadherin binding [GO:0045296]; enzyme binding [GO:0019899]; fibroblast growth factor binding [GO:0017134]; mRNA binding [GO:0003729]; RNA binding [GO:0003723]; structural constituent of ribosom…	cytosol [GO:0005829]; cytosolic small ribosomal subunit [GO:0022627]; extracellular exosome [GO:0070062]; focal adhesion [GO:0005925]; membrane [GO:0016020]; nucleoplasm [GO:0005654]; nucleus [GO:0005634]; cadherin binding [GO:0045296]; enzyme binding [GO:0019899]; fibroblast growth factor binding [GO:0017134]; mRNA binding [GO:0003729]; RNA binding [GO:0003723]; structural constituent of ribosom…	cytosol [GO:0005829]; cytosolic small ribosomal subunit [GO:0022627]; extracellular exosome [GO:0070062]; focal adhesion [GO:0005925]; membrane [GO:0016020]; nucleoplasm [GO:0005654]; nucleus [GO:0005634]; cadherin binding [GO:0045296]; enzyme binding [GO:0019899]; fibroblast growth factor binding [GO:0017134]; mRNA binding [GO:0003729]; RNA binding [GO:0003723]; structural constituent of ribosom…		31324	31
PACN3_HUMAN	-0.0760249	0.0193324	PACSIN3	PACSIN3	Protein kinase C and casein kinase substrate in neurons protein 3	-2.5438	-2.26449	0.0335727	0.183709	0.23306	2.35568	20	0.0186794	0.00535915	0.00676274	424	cytoplasm [GO:0005737]; cytosol [GO:0005829]; endosome [GO:0005768]; extracellular exosome [GO:0070062]; plasma membrane [GO:0005886]; calcium channel inhibitor activity [GO:0019855]; cytoskeletal protein binding [GO:0008092]; lipid binding [GO:0008289]; endocytosis [GO:0006897]; negative regulation of calcium ion transport [GO:0051926]; negative regulation of endocytosis [GO:0045806]; plasma mem…	cytoplasm [GO:0005737]; cytosol [GO:0005829]; endosome [GO:0005768]; extracellular exosome [GO:0070062]; plasma membrane [GO:0005886]; calcium channel inhibitor activity [GO:0019855]; cytoskeletal protein binding [GO:0008092]; lipid binding [GO:0008289]; endocytosis [GO:0006897]; negative regulation of calcium ion transport [GO:0051926]; negative regulation of endocytosis [GO:0045806]; plasma mem…	cytoplasm [GO:0005737]; cytosol [GO:0005829]; endosome [GO:0005768]; extracellular exosome [GO:0070062]; plasma membrane [GO:0005886]; calcium channel inhibitor activity [GO:0019855]; cytoskeletal protein binding [GO:0008092]; lipid binding [GO:0008289]; endocytosis [GO:0006897]; negative regulation of calcium ion transport [GO:0051926]; negative regulation of endocytosis [GO:0045806]; plasma mem…	Plays a role in endocytosis and regulates internalization of plasma membrane proteins. Overexpression impairs internalization of SLC2A1/GLUT1 and TRPV4 and increases the levels of SLC2A1/GLUT1 and TRPV4 at the cell membrane. Inhibits the TRPV4 calcium channel activity (By similarity). {ECO:0000250, ECO:0000269|PubMed:11082044}.	48487	48
WDR26_HUMAN	-0.0762353	0.0288979	WDR26	WDR26 CDW2 MIP2 PRO0852	WD repeat-containing protein 26	-2.35417	-2.14241	0.0432951	0.220347	0.26156	2.35568	20	0.0186794	0.00629198	0.00759727	661	cytoplasm [GO:0005737]; cytosol [GO:0005829]; nucleoplasm [GO:0005654]	cytoplasm [GO:0005737]; cytosol [GO:0005829]; nucleoplasm [GO:0005654]	cytoplasm [GO:0005737]; cytosol [GO:0005829]; nucleoplasm [GO:0005654]	May be involved in MAPK pathways. {ECO:0000269|PubMed:15378603}.	72124	72
TLN2_HUMAN	-0.0769932	0.00365797	TLN2	TLN2 KIAA0320	Talin-2	-3.29017	-2.69208	0.013202	0.12239	0.15898	2.35568	20	0.0186794	0.00328563	0.00490772	2542	actin cytoskeleton [GO:0015629]; cell-cell junction [GO:0005911]; cytoplasm [GO:0005737]; focal adhesion [GO:0005925]; plasma membrane [GO:0005886]; ruffle [GO:0001726]; synapse [GO:0045202]; actin binding [GO:0003779]; actin filament binding [GO:0051015]; structural constituent of cytoskeleton [GO:0005200]; structural molecule activity [GO:0005198]; cell adhesion [GO:0007155]; cell-cell junction…	actin cytoskeleton [GO:0015629]; cell-cell junction [GO:0005911]; cytoplasm [GO:0005737]; focal adhesion [GO:0005925]; plasma membrane [GO:0005886]; ruffle [GO:0001726]; synapse [GO:0045202]; actin binding [GO:0003779]; actin filament binding [GO:0051015]; structural constituent of cytoskeleton [GO:0005200]; structural molecule activity [GO:0005198]; cell adhesion [GO:0007155]; cell-cell junction…	actin cytoskeleton [GO:0015629]; cell-cell junction [GO:0005911]; cytoplasm [GO:0005737]; focal adhesion [GO:0005925]; plasma membrane [GO:0005886]; ruffle [GO:0001726]; synapse [GO:0045202]; actin binding [GO:0003779]; actin filament binding [GO:0051015]; structural constituent of cytoskeleton [GO:0005200]; structural molecule activity [GO:0005198]; cell adhesion [GO:0007155]; cell-cell junction…	As a major component of focal adhesion plaques that links integrin to the actin cytoskeleton, may play an important role in cell adhesion. Recruits PIP5K1C to focal adhesion plaques and strongly activates its kinase activity (By similarity). {ECO:0000250}.	271613	272
NPM_HUMAN	-0.0770899	0.00491649	NPM1	NPM1 NPM	Nucleophosmin	-3.1608	-2.62842	0.015227	0.131925	0.167564	2.35568	20	0.0186794	0.00356904	0.00516126	294	centrosome [GO:0005813]; cytoplasm [GO:0005737]; cytosol [GO:0005829]; focal adhesion [GO:0005925]; intracellular ribonucleoprotein complex [GO:0030529]; membrane [GO:0016020]; nucleolus [GO:0005730]; nucleoplasm [GO:0005654]; nucleus [GO:0005634]; protein complex [GO:0043234]; protein-DNA complex [GO:0032993]; spindle pole centrosome [GO:0031616]; activating transcription factor binding [GO:0033…	centrosome [GO:0005813]; cytoplasm [GO:0005737]; cytosol [GO:0005829]; focal adhesion [GO:0005925]; intracellular ribonucleoprotein complex [GO:0030529]; membrane [GO:0016020]; nucleolus [GO:0005730]; nucleoplasm [GO:0005654]; nucleus [GO:0005634]; protein complex [GO:0043234]; protein-DNA complex [GO:0032993]; spindle pole centrosome [GO:0031616]; activating transcription factor binding [GO:0033…	centrosome [GO:0005813]; cytoplasm [GO:0005737]; cytosol [GO:0005829]; focal adhesion [GO:0005925]; intracellular ribonucleoprotein complex [GO:0030529]; membrane [GO:0016020]; nucleolus [GO:0005730]; nucleoplasm [GO:0005654]; nucleus [GO:0005634]; protein complex [GO:0043234]; protein-DNA complex [GO:0032993]; spindle pole centrosome [GO:0031616]; activating transcription factor binding [GO:0033…	Involved in diverse cellular processes such as ribosome biogenesis, centrosome duplication, protein chaperoning, histone assembly, cell proliferation, and regulation of tumor suppressors p53/TP53 and ARF. Binds ribosome presumably to drive ribosome nuclear export. Associated with nucleolar ribonucleoprotein structures and bind single-stranded nucleic acids. Acts as a chaperonin for the core histo…	32575	33
PBIP1_HUMAN	-0.0771345	0.0120332	PBXIP1	PBXIP1 HPIP	Pre-B-cell leukemia transcription factor-interacting protein 1	-2.76167	-2.40816	0.0247065	0.157154	0.205201	2.35568	20	0.0186794	0.00468064	0.00615573	731	cytosol [GO:0005829]; microtubule [GO:0005874]; nucleus [GO:0005634]; transcription corepressor activity [GO:0003714]; cell differentiation [GO:0030154]; multicellular organism development [GO:0007275]; negative regulation of transcription, DNA-templated [GO:0045892]	cytosol [GO:0005829]; microtubule [GO:0005874]; nucleus [GO:0005634]; transcription corepressor activity [GO:0003714]; cell differentiation [GO:0030154]; multicellular organism development [GO:0007275]; negative regulation of transcription, DNA-templated [GO:0045892]	cytosol [GO:0005829]; microtubule [GO:0005874]; nucleus [GO:0005634]; transcription corepressor activity [GO:0003714]; cell differentiation [GO:0030154]; multicellular organism development [GO:0007275]; negative regulation of transcription, DNA-templated [GO:0045892]	Regulator of pre-B-cell leukemia transcription factors (BPXs) function. Inhibits the binding of PBX1-HOX complex to DNA and blocks the transcriptional activity of E2A-PBX1. Tethers estrogen receptor-alpha (ESR1) to microtubules and allows them to influence estrogen receptors-alpha signaling. {ECO:0000269|PubMed:10825160, ECO:0000269|PubMed:12360403, ECO:0000269|PubMed:17043237}.	80643	81
SUN1_HUMAN	-0.0779131	0.00605139	SUN1	SUN1 KIAA0810 UNC84A	SUN domain-containing protein 1	-3.0693	-2.59059	0.0165651	0.13556	0.174693	2.35568	20	0.0186794	0.00386628	0.00542718	812	acrosomal membrane [GO:0002080]; integral component of nuclear inner membrane [GO:0005639]; intracellular membrane-bounded organelle [GO:0043231]; LINC complex [GO:0034993]; nuclear envelope [GO:0005635]; nuclear membrane [GO:0031965]; lamin binding [GO:0005521]; centrosome localization [GO:0051642]; cytoskeletal anchoring at nuclear membrane [GO:0090286]; meiotic attachment of telomere to nuclea…	acrosomal membrane [GO:0002080]; integral component of nuclear inner membrane [GO:0005639]; intracellular membrane-bounded organelle [GO:0043231]; LINC complex [GO:0034993]; nuclear envelope [GO:0005635]; nuclear membrane [GO:0031965]; lamin binding [GO:0005521]; centrosome localization [GO:0051642]; cytoskeletal anchoring at nuclear membrane [GO:0090286]; meiotic attachment of telomere to nuclea…	acrosomal membrane [GO:0002080]; integral component of nuclear inner membrane [GO:0005639]; intracellular membrane-bounded organelle [GO:0043231]; LINC complex [GO:0034993]; nuclear envelope [GO:0005635]; nuclear membrane [GO:0031965]; lamin binding [GO:0005521]; centrosome localization [GO:0051642]; cytoskeletal anchoring at nuclear membrane [GO:0090286]; meiotic attachment of telomere to nuclea…	As a component of the LINC (LInker of Nucleoskeleton and Cytoskeleton) complex involved in the connection between the nuclear lamina and the cytoskeleton. The nucleocytoplasmic interactions established by the LINC complex play an important role in the transmission of mechanical forces across the nuclear envelope and in nuclear movement and positioning. Required for interkinetic nuclear migration …	90064	90
RCN2_HUMAN	-0.078464	0.0163544	RCN2	RCN2 ERC55	Reticulocalbin-2	-2.62131	-2.33455	0.0289372	0.175569	0.219124	2.35568	20	0.0186794	0.00537595	0.00677777	317	endoplasmic reticulum [GO:0005783]; endoplasmic reticulum lumen [GO:0005788]; nucleolus [GO:0005730]; calcium ion binding [GO:0005509]	endoplasmic reticulum [GO:0005783]; endoplasmic reticulum lumen [GO:0005788]; nucleolus [GO:0005730]; calcium ion binding [GO:0005509]	endoplasmic reticulum [GO:0005783]; endoplasmic reticulum lumen [GO:0005788]; nucleolus [GO:0005730]; calcium ion binding [GO:0005509]	Not known. Binds calcium.	36876	37
GLYR1_HUMAN	-0.0792548	0.0311501	GLYR1	GLYR1 HIBDL NP60	Putative oxidoreductase GLYR1	-2.31817	-2.13832	0.0436607	0.22869	0.262414	2.35568	20	0.0186794	0.00701312	0.00824243	553	cytosol [GO:0005829]; Golgi apparatus [GO:0005794]; nuclear speck [GO:0016607]; nucleoplasm [GO:0005654]; nucleosome [GO:0000786]; DNA binding [GO:0003677]; histone binding [GO:0042393]; methylated histone binding [GO:0035064]; NAD binding [GO:0051287]; phosphogluconate dehydrogenase (decarboxylating) activity [GO:0004616]	cytosol [GO:0005829]; Golgi apparatus [GO:0005794]; nuclear speck [GO:0016607]; nucleoplasm [GO:0005654]; nucleosome [GO:0000786]; DNA binding [GO:0003677]; histone binding [GO:0042393]; methylated histone binding [GO:0035064]; NAD binding [GO:0051287]; phosphogluconate dehydrogenase (decarboxylating) activity [GO:0004616]	cytosol [GO:0005829]; Golgi apparatus [GO:0005794]; nuclear speck [GO:0016607]; nucleoplasm [GO:0005654]; nucleosome [GO:0000786]; DNA binding [GO:0003677]; histone binding [GO:0042393]; methylated histone binding [GO:0035064]; NAD binding [GO:0051287]; phosphogluconate dehydrogenase (decarboxylating) activity [GO:0004616]	Putative oxidoreductase that is recruited on chromatin and promotes KDM1B demethylase activity (PubMed:23260659). Recognizes and binds trimethylated 'Lys-36' of histone H3 (H3K36me3) (PubMed:20850016). Regulates p38 MAP kinase activity by mediating stress activation of p38alpha/MAPK14 and specifically regulating MAPK14 signaling (PubMed:16352664). Indirectly promotes phosphorylation of MAPK14 and…	60556	61
GDE_HUMAN	-0.0794514	0.0348321	AGL	AGL GDE	Glycogen debranching enzyme	-2.26419	-2.1013	0.047102	0.239049	0.271153	2.35568	20	0.0186794	0.00738804	0.00857784	1532	cytoplasm [GO:0005737]; cytosol [GO:0005829]; extracellular region [GO:0005576]; ficolin-1-rich granule lumen [GO:1904813]; inclusion body [GO:0016234]; isoamylase complex [GO:0043033]; nucleus [GO:0005634]; sarcoplasmic reticulum [GO:0016529]; secretory granule lumen [GO:0034774]; 4-alpha-glucanotransferase activity [GO:0004134]; amylo-alpha-1,6-glucosidase activity [GO:0004135]; glycogen debran…	cytoplasm [GO:0005737]; cytosol [GO:0005829]; extracellular region [GO:0005576]; ficolin-1-rich granule lumen [GO:1904813]; inclusion body [GO:0016234]; isoamylase complex [GO:0043033]; nucleus [GO:0005634]; sarcoplasmic reticulum [GO:0016529]; secretory granule lumen [GO:0034774]; 4-alpha-glucanotransferase activity [GO:0004134]; amylo-alpha-1,6-glucosidase activity [GO:0004135]; glycogen debran…	cytoplasm [GO:0005737]; cytosol [GO:0005829]; extracellular region [GO:0005576]; ficolin-1-rich granule lumen [GO:1904813]; inclusion body [GO:0016234]; isoamylase complex [GO:0043033]; nucleus [GO:0005634]; sarcoplasmic reticulum [GO:0016529]; secretory granule lumen [GO:0034774]; 4-alpha-glucanotransferase activity [GO:0004134]; amylo-alpha-1,6-glucosidase activity [GO:0004135]; glycogen debran…	Multifunctional enzyme acting as 1,4-alpha-D-glucan:1,4-alpha-D-glucan 4-alpha-D-glycosyltransferase and amylo-1,6-glucosidase in glycogen degradation.	174764	175
UB2L3_HUMAN	-0.079753	0.0195706	UBE2L3	UBE2L3 UBCE7 UBCH7	Ubiquitin-conjugating enzyme E2 L3	-2.5381	-2.29144	0.0317145	0.185255	0.228863	2.35568	20	0.0186794	0.00592419	0.00726824	154	cytoplasm [GO:0005737]; cytosol [GO:0005829]; extracellular exosome [GO:0070062]; nucleoplasm [GO:0005654]; nucleus [GO:0005634]; ubiquitin ligase complex [GO:0000151]; ATP binding [GO:0005524]; enzyme binding [GO:0019899]; RNA binding [GO:0003723]; transcription coactivator activity [GO:0003713]; ubiquitin conjugating enzyme activity [GO:0061631]; ubiquitin protein ligase binding [GO:0031625]; u…	cytoplasm [GO:0005737]; cytosol [GO:0005829]; extracellular exosome [GO:0070062]; nucleoplasm [GO:0005654]; nucleus [GO:0005634]; ubiquitin ligase complex [GO:0000151]; ATP binding [GO:0005524]; enzyme binding [GO:0019899]; RNA binding [GO:0003723]; transcription coactivator activity [GO:0003713]; ubiquitin conjugating enzyme activity [GO:0061631]; ubiquitin protein ligase binding [GO:0031625]; u…	cytoplasm [GO:0005737]; cytosol [GO:0005829]; extracellular exosome [GO:0070062]; nucleoplasm [GO:0005654]; nucleus [GO:0005634]; ubiquitin ligase complex [GO:0000151]; ATP binding [GO:0005524]; enzyme binding [GO:0019899]; RNA binding [GO:0003723]; transcription coactivator activity [GO:0003713]; ubiquitin conjugating enzyme activity [GO:0061631]; ubiquitin protein ligase binding [GO:0031625]; u…	Ubiquitin-conjugating enzyme E2 that specifically acts with HECT-type and RBR family E3 ubiquitin-protein ligases. Does not function with most RING-containing E3 ubiquitin-protein ligases because it lacks intrinsic E3-independent reactivity with lysine: in contrast, it has activity with the RBR family E3 enzymes, such as PRKN and ARIH1, that function like function like RING-HECT hybrids. Accepts …	17862	18
RBP2_HUMAN	-0.0799725	0.0301765	RANBP2	RANBP2 NUP358	E3 SUMO-protein ligase RanBP2	-2.33343	-2.15366	0.0423031	0.22461	0.260143	2.35568	20	0.0186794	0.00704764	0.00827331	3224	annulate lamellae [GO:0005642]; centrosome [GO:0005813]; cytoplasm [GO:0005737]; cytosol [GO:0005829]; intracellular membrane-bounded organelle [GO:0043231]; membrane [GO:0016020]; nuclear envelope [GO:0005635]; nuclear inclusion body [GO:0042405]; nuclear membrane [GO:0031965]; nuclear pore [GO:0005643]; nuclear pore cytoplasmic filaments [GO:0044614]; nuclear pore nuclear basket [GO:0044615]; l…	annulate lamellae [GO:0005642]; centrosome [GO:0005813]; cytoplasm [GO:0005737]; cytosol [GO:0005829]; intracellular membrane-bounded organelle [GO:0043231]; membrane [GO:0016020]; nuclear envelope [GO:0005635]; nuclear inclusion body [GO:0042405]; nuclear membrane [GO:0031965]; nuclear pore [GO:0005643]; nuclear pore cytoplasmic filaments [GO:0044614]; nuclear pore nuclear basket [GO:0044615]; l…	annulate lamellae [GO:0005642]; centrosome [GO:0005813]; cytoplasm [GO:0005737]; cytosol [GO:0005829]; intracellular membrane-bounded organelle [GO:0043231]; membrane [GO:0016020]; nuclear envelope [GO:0005635]; nuclear inclusion body [GO:0042405]; nuclear membrane [GO:0031965]; nuclear pore [GO:0005643]; nuclear pore cytoplasmic filaments [GO:0044614]; nuclear pore nuclear basket [GO:0044615]; l…	E3 SUMO-protein ligase which facilitates SUMO1 and SUMO2 conjugation by UBE2I. Involved in transport factor (Ran-GTP, karyopherin)-mediated protein import via the F-G repeat-containing domain which acts as a docking site for substrates. Binds single-stranded RNA (in vitro). May bind DNA. Component of the nuclear export pathway. Specific docking site for the nuclear export factor exportin-1. Sumoy…	358199	358
NU205_HUMAN	-0.0799979	0.0451519	NUP205	NUP205 C7orf14 KIAA0225	Nuclear pore complex protein Nup205	-2.13684	-2.01134	0.0564981	0.267066	0.288046	2.35568	20	0.0186794	0.00840937	0.00949156	2012	membrane [GO:0016020]; nuclear envelope [GO:0005635]; nuclear membrane [GO:0031965]; nuclear periphery [GO:0034399]; nuclear pore [GO:0005643]; nuclear pore inner ring [GO:0044611]; structural constituent of nuclear pore [GO:0017056]; gene silencing by RNA [GO:0031047]; intracellular transport of virus [GO:0075733]; mitotic nuclear envelope disassembly [GO:0007077]; mRNA export from nucleus [GO:0…	membrane [GO:0016020]; nuclear envelope [GO:0005635]; nuclear membrane [GO:0031965]; nuclear periphery [GO:0034399]; nuclear pore [GO:0005643]; nuclear pore inner ring [GO:0044611]; structural constituent of nuclear pore [GO:0017056]; gene silencing by RNA [GO:0031047]; intracellular transport of virus [GO:0075733]; mitotic nuclear envelope disassembly [GO:0007077]; mRNA export from nucleus [GO:0…	membrane [GO:0016020]; nuclear envelope [GO:0005635]; nuclear membrane [GO:0031965]; nuclear periphery [GO:0034399]; nuclear pore [GO:0005643]; nuclear pore inner ring [GO:0044611]; structural constituent of nuclear pore [GO:0017056]; gene silencing by RNA [GO:0031047]; intracellular transport of virus [GO:0075733]; mitotic nuclear envelope disassembly [GO:0007077]; mRNA export from nucleus [GO:0…	Plays a role in the nuclear pore complex (NPC) assembly and/or maintenance. May anchor NUP62 and other nucleoporins, but not NUP153 and TPR, to the NPC. {ECO:0000269|PubMed:15229283}.	227922	228
DC1I2_HUMAN	-0.080213	0.0187152	DYNC1I2	DYNC1I2 DNCI2 DNCIC2	Cytoplasmic dynein 1 intermediate chain 2	-2.55889	-2.3087	0.0305741	0.183536	0.224531	2.35568	20	0.0186794	0.00589571	0.00724276	638	centrosome [GO:0005813]; cytoplasm [GO:0005737]; cytoplasmic dynein complex [GO:0005868]; cytosol [GO:0005829]; microtubule [GO:0005874]; vesicle [GO:0031982]; microtubule motor activity [GO:0003777]; antigen processing and presentation of exogenous peptide antigen via MHC class II [GO:0019886]; ciliary basal body docking [GO:0097711]; ER to Golgi vesicle-mediated transport [GO:0006888]; G2/M tra…	centrosome [GO:0005813]; cytoplasm [GO:0005737]; cytoplasmic dynein complex [GO:0005868]; cytosol [GO:0005829]; microtubule [GO:0005874]; vesicle [GO:0031982]; microtubule motor activity [GO:0003777]; antigen processing and presentation of exogenous peptide antigen via MHC class II [GO:0019886]; ciliary basal body docking [GO:0097711]; ER to Golgi vesicle-mediated transport [GO:0006888]; G2/M tra…	centrosome [GO:0005813]; cytoplasm [GO:0005737]; cytoplasmic dynein complex [GO:0005868]; cytosol [GO:0005829]; microtubule [GO:0005874]; vesicle [GO:0031982]; microtubule motor activity [GO:0003777]; antigen processing and presentation of exogenous peptide antigen via MHC class II [GO:0019886]; ciliary basal body docking [GO:0097711]; ER to Golgi vesicle-mediated transport [GO:0006888]; G2/M tra…	Acts as one of several non-catalytic accessory components of the cytoplasmic dynein 1 complex that are thought to be involved in linking dynein to cargos and to adapter proteins that regulate dynein function. Cytoplasmic dynein 1 acts as a motor for the intracellular retrograde motility of vesicles and organelles along microtubules. The intermediate chains mediate the binding of dynein to dynacti…	71457	71
TBCD4_HUMAN	-0.0806489	0.0182649	TBC1D4	TBC1D4 AS160 KIAA0603	TBC1 domain family member 4	-2.5702	-2.31954	0.0298774	0.182404	0.222565	2.35568	20	0.0186794	0.00590763	0.00725343	1298	cytoplasmic vesicle membrane [GO:0030659]; cytosol [GO:0005829]; endomembrane system [GO:0012505]; extracellular exosome [GO:0070062]; intracellular [GO:0005622]; GTPase activator activity [GO:0005096]; Rab GTPase binding [GO:0017137]; activation of GTPase activity [GO:0090630]; cellular response to insulin stimulus [GO:0032869]; intracellular protein transport [GO:0006886]; membrane organization…	cytoplasmic vesicle membrane [GO:0030659]; cytosol [GO:0005829]; endomembrane system [GO:0012505]; extracellular exosome [GO:0070062]; intracellular [GO:0005622]; GTPase activator activity [GO:0005096]; Rab GTPase binding [GO:0017137]; activation of GTPase activity [GO:0090630]; cellular response to insulin stimulus [GO:0032869]; intracellular protein transport [GO:0006886]; membrane organization…	cytoplasmic vesicle membrane [GO:0030659]; cytosol [GO:0005829]; endomembrane system [GO:0012505]; extracellular exosome [GO:0070062]; intracellular [GO:0005622]; GTPase activator activity [GO:0005096]; Rab GTPase binding [GO:0017137]; activation of GTPase activity [GO:0090630]; cellular response to insulin stimulus [GO:0032869]; intracellular protein transport [GO:0006886]; membrane organization…	May act as a GTPase-activating protein for RAB2A, RAB8A, RAB10 and RAB14. Isoform 2 promotes insulin-induced glucose transporter SLC2A4/GLUT4 translocation at the plasma membrane, thus increasing glucose uptake. {ECO:0000269|PubMed:15971998, ECO:0000269|PubMed:18771725, ECO:0000269|PubMed:22908308}.	146563	147
RINI_HUMAN	-0.0819562	0.0418416	RNH1	RNH1 PRI RNH	Ribonuclease inhibitor	-2.17451	-2.04963	0.0523116	0.259379	0.282643	2.35568	20	0.0186794	0.00852299	0.0095932	461	angiogenin-PRI complex [GO:0032311]; cytosol [GO:0005829]; extracellular exosome [GO:0070062]; nucleoplasm [GO:0005654]; ribonuclease inhibitor activity [GO:0008428]; mRNA catabolic process [GO:0006402]; regulation of angiogenesis [GO:0045765]	angiogenin-PRI complex [GO:0032311]; cytosol [GO:0005829]; extracellular exosome [GO:0070062]; nucleoplasm [GO:0005654]; ribonuclease inhibitor activity [GO:0008428]; mRNA catabolic process [GO:0006402]; regulation of angiogenesis [GO:0045765]	angiogenin-PRI complex [GO:0032311]; cytosol [GO:0005829]; extracellular exosome [GO:0070062]; nucleoplasm [GO:0005654]; ribonuclease inhibitor activity [GO:0008428]; mRNA catabolic process [GO:0006402]; regulation of angiogenesis [GO:0045765]	Ribonuclease inhibitor which inhibits RNASE1, RNASE2 and ANG. May play a role in redox homeostasis. {ECO:0000269|PubMed:12578357, ECO:0000269|PubMed:14515218, ECO:0000269|PubMed:17292889}.	49973	50
STRN3_HUMAN	-0.0822818	0.0404295	STRN3	STRN3 GS2NA SG2NA	Striatin-3	-2.19141	-2.06396	0.050818	0.256126	0.278971	2.35568	20	0.0186794	0.00845884	0.00953581	797	cytoplasm [GO:0005737]; dendrite [GO:0030425]; Golgi apparatus [GO:0005794]; neuronal cell body [GO:0043025]; nucleoplasm [GO:0005654]; nucleus [GO:0005634]; plasma membrane [GO:0005886]; protein complex [GO:0043234]; armadillo repeat domain binding [GO:0070016]; calmodulin binding [GO:0005516]; protein complex binding [GO:0032403]; protein phosphatase 2A binding [GO:0051721]; transcription facto…	cytoplasm [GO:0005737]; dendrite [GO:0030425]; Golgi apparatus [GO:0005794]; neuronal cell body [GO:0043025]; nucleoplasm [GO:0005654]; nucleus [GO:0005634]; plasma membrane [GO:0005886]; protein complex [GO:0043234]; armadillo repeat domain binding [GO:0070016]; calmodulin binding [GO:0005516]; protein complex binding [GO:0032403]; protein phosphatase 2A binding [GO:0051721]; transcription facto…	cytoplasm [GO:0005737]; dendrite [GO:0030425]; Golgi apparatus [GO:0005794]; neuronal cell body [GO:0043025]; nucleoplasm [GO:0005654]; nucleus [GO:0005634]; plasma membrane [GO:0005886]; protein complex [GO:0043234]; armadillo repeat domain binding [GO:0070016]; calmodulin binding [GO:0005516]; protein complex binding [GO:0032403]; protein phosphatase 2A binding [GO:0051721]; transcription facto…	Binds calmodulin in a calcium dependent manner. May function as scaffolding or signaling protein.	87209	87
H2AY_HUMAN	-0.0826175	0.0377992	H2AFY	H2AFY MACROH2A1	Core histone macro-H2A.1	-2.22438	-2.09028	0.0481729	0.248451	0.273828	2.35568	20	0.0186794	0.0082771	0.00937322	372	Barr body [GO:0001740]; condensed chromosome [GO:0000793]; extracellular exosome [GO:0070062]; nuclear chromatin [GO:0000790]; nuclear chromosome [GO:0000228]; nuclear chromosome, telomeric region [GO:0000784]; nucleolus [GO:0005730]; nucleosome [GO:0000786]; nucleus [GO:0005634]; pericentric heterochromatin [GO:0005721]; sex chromatin [GO:0001739]; chromatin DNA binding [GO:0031490]; core promot…	Barr body [GO:0001740]; condensed chromosome [GO:0000793]; extracellular exosome [GO:0070062]; nuclear chromatin [GO:0000790]; nuclear chromosome [GO:0000228]; nuclear chromosome, telomeric region [GO:0000784]; nucleolus [GO:0005730]; nucleosome [GO:0000786]; nucleus [GO:0005634]; pericentric heterochromatin [GO:0005721]; sex chromatin [GO:0001739]; chromatin DNA binding [GO:0031490]; core promot…	Barr body [GO:0001740]; condensed chromosome [GO:0000793]; extracellular exosome [GO:0070062]; nuclear chromatin [GO:0000790]; nuclear chromosome [GO:0000228]; nuclear chromosome, telomeric region [GO:0000784]; nucleolus [GO:0005730]; nucleosome [GO:0000786]; nucleus [GO:0005634]; pericentric heterochromatin [GO:0005721]; sex chromatin [GO:0001739]; chromatin DNA binding [GO:0031490]; core promot…	Variant histone H2A which replaces conventional H2A in a subset of nucleosomes where it represses transcription (PubMed:12718888, PubMed:15621527, PubMed:16428466). Nucleosomes wrap and compact DNA into chromatin, limiting DNA accessibility to the cellular machineries which require DNA as a template. Histones thereby play a central role in transcription regulation, DNA repair, DNA replication and…	39617	40
CACB1_HUMAN	-0.0832403	0.00678412	CACNB1	CACNB1 CACNLB1	Voltage-dependent L-type calcium channel subunit beta-1	-3.01869	-2.62143	0.0154665	0.138863	0.16981	2.35568	20	0.0186794	0.00456226	0.00604982	598	plasma membrane [GO:0005886]; sarcolemma [GO:0042383]; voltage-gated calcium channel complex [GO:0005891]; high voltage-gated calcium channel activity [GO:0008331]; voltage-gated calcium channel activity [GO:0005245]; cardiac conduction [GO:0061337]; chemical synaptic transmission [GO:0007268]; neuromuscular junction development [GO:0007528]; regulation of voltage-gated calcium channel activity […	plasma membrane [GO:0005886]; sarcolemma [GO:0042383]; voltage-gated calcium channel complex [GO:0005891]; high voltage-gated calcium channel activity [GO:0008331]; voltage-gated calcium channel activity [GO:0005245]; cardiac conduction [GO:0061337]; chemical synaptic transmission [GO:0007268]; neuromuscular junction development [GO:0007528]; regulation of voltage-gated calcium channel activity […	plasma membrane [GO:0005886]; sarcolemma [GO:0042383]; voltage-gated calcium channel complex [GO:0005891]; high voltage-gated calcium channel activity [GO:0008331]; voltage-gated calcium channel activity [GO:0005245]; cardiac conduction [GO:0061337]; chemical synaptic transmission [GO:0007268]; neuromuscular junction development [GO:0007528]; regulation of voltage-gated calcium channel activity […	The beta subunit of voltage-dependent calcium channels contributes to the function of the calcium channel by increasing peak calcium current, shifting the voltage dependencies of activation and inactivation, modulating G protein inhibition and controlling the alpha-1 subunit membrane targeting.	65714	66
ACL6A_HUMAN	-0.083316	0.012001	ACTL6A	ACTL6A BAF53 BAF53A INO80K	Actin-like protein 6A	-2.76289	-2.4659	0.0217961	0.157154	0.195264	2.35568	20	0.0186794	0.0054561	0.00684947	429	Ino80 complex [GO:0031011]; npBAF complex [GO:0071564]; NuA4 histone acetyltransferase complex [GO:0035267]; nuclear chromatin [GO:0000790]; nucleoplasm [GO:0005654]; nucleus [GO:0005634]; plasma membrane [GO:0005886]; protein complex [GO:0043234]; SWI/SNF complex [GO:0016514]; chromatin binding [GO:0003682]; transcription coactivator activity [GO:0003713]; ATP-dependent chromatin remodeling [GO:…	Ino80 complex [GO:0031011]; npBAF complex [GO:0071564]; NuA4 histone acetyltransferase complex [GO:0035267]; nuclear chromatin [GO:0000790]; nucleoplasm [GO:0005654]; nucleus [GO:0005634]; plasma membrane [GO:0005886]; protein complex [GO:0043234]; SWI/SNF complex [GO:0016514]; chromatin binding [GO:0003682]; transcription coactivator activity [GO:0003713]; ATP-dependent chromatin remodeling [GO:…	Ino80 complex [GO:0031011]; npBAF complex [GO:0071564]; NuA4 histone acetyltransferase complex [GO:0035267]; nuclear chromatin [GO:0000790]; nucleoplasm [GO:0005654]; nucleus [GO:0005634]; plasma membrane [GO:0005886]; protein complex [GO:0043234]; SWI/SNF complex [GO:0016514]; chromatin binding [GO:0003682]; transcription coactivator activity [GO:0003713]; ATP-dependent chromatin remodeling [GO:…	Involved in transcriptional activation and repression of select genes by chromatin remodeling (alteration of DNA-nucleosome topology). Required for maximal ATPase activity of SMARCA4/BRG1/BAF190A and for association of the SMARCA4/BRG1/BAF190A containing remodeling complex BAF with chromatin/nuclear matrix. Belongs to the neural progenitors-specific chromatin remodeling complex (npBAF complex) an…	47461	47
HNRH2_HUMAN	-0.0834125	0.00153118	HNRNPH2	HNRNPH2 FTP3 HNRPH2	Heterogeneous nuclear ribonucleoprotein H2	-3.66677	-2.9658	0.00705894	0.112467	0.132097	2.35568	20	0.0186794	0.00310488	0.00474601	449	cytosol [GO:0005829]; intracellular ribonucleoprotein complex [GO:0030529]; membrane [GO:0016020]; nucleoplasm [GO:0005654]; nucleus [GO:0005634]; RNA binding [GO:0003723]; gene expression [GO:0010467]; mRNA splicing, via spliceosome [GO:0000398]	cytosol [GO:0005829]; intracellular ribonucleoprotein complex [GO:0030529]; membrane [GO:0016020]; nucleoplasm [GO:0005654]; nucleus [GO:0005634]; RNA binding [GO:0003723]; gene expression [GO:0010467]; mRNA splicing, via spliceosome [GO:0000398]	cytosol [GO:0005829]; intracellular ribonucleoprotein complex [GO:0030529]; membrane [GO:0016020]; nucleoplasm [GO:0005654]; nucleus [GO:0005634]; RNA binding [GO:0003723]; gene expression [GO:0010467]; mRNA splicing, via spliceosome [GO:0000398]	This protein is a component of the heterogeneous nuclear ribonucleoprotein (hnRNP) complexes which provide the substrate for the processing events that pre-mRNAs undergo before becoming functional, translatable mRNAs in the cytoplasm. Binds poly(RG).	49264	49
DCTN4_HUMAN	-0.0834454	0.00425883	DCTN4	DCTN4	Dynactin subunit 4	-3.22375	-2.74003	0.0118476	0.124774	0.155949	2.35568	20	0.0186794	0.00402007	0.00556477	460	centrosome [GO:0005813]; cytoplasm [GO:0005737]; cytoplasmic dynein complex [GO:0005868]; cytosol [GO:0005829]; dynactin complex [GO:0005869]; nucleus [GO:0005634]; protein N-terminus binding [GO:0047485]; antigen processing and presentation of exogenous peptide antigen via MHC class II [GO:0019886]; ER to Golgi vesicle-mediated transport [GO:0006888]; nuclear migration [GO:0007097]	centrosome [GO:0005813]; cytoplasm [GO:0005737]; cytoplasmic dynein complex [GO:0005868]; cytosol [GO:0005829]; dynactin complex [GO:0005869]; nucleus [GO:0005634]; protein N-terminus binding [GO:0047485]; antigen processing and presentation of exogenous peptide antigen via MHC class II [GO:0019886]; ER to Golgi vesicle-mediated transport [GO:0006888]; nuclear migration [GO:0007097]	centrosome [GO:0005813]; cytoplasm [GO:0005737]; cytoplasmic dynein complex [GO:0005868]; cytosol [GO:0005829]; dynactin complex [GO:0005869]; nucleus [GO:0005634]; protein N-terminus binding [GO:0047485]; antigen processing and presentation of exogenous peptide antigen via MHC class II [GO:0019886]; ER to Golgi vesicle-mediated transport [GO:0006888]; nuclear migration [GO:0007097]	Could have a dual role in dynein targeting and in ACTR1A/Arp1 subunit of dynactin pointed-end capping. Could be involved in ACTR1A pointed-end binding and in additional roles in linking dynein and dynactin to the cortical cytoskeleton.	52337	52
TEBP_HUMAN	-0.0838675	0.00833484	PTGES3	PTGES3 P23 TEBP	Prostaglandin E synthase 3	-2.92704	-2.57292	0.0172275	0.141415	0.17705	2.35568	20	0.0186794	0.00492586	0.00637511	160	chromosome, telomeric region [GO:0000781]; cytosol [GO:0005829]; extracellular exosome [GO:0070062]; nucleoplasm [GO:0005654]; nucleus [GO:0005634]; protein complex [GO:0043234]; telomerase holoenzyme complex [GO:0005697]; DNA polymerase binding [GO:0070182]; Hsp90 protein binding [GO:0051879]; prostaglandin-E synthase activity [GO:0050220]; telomerase activity [GO:0003720]; unfolded protein bind…	chromosome, telomeric region [GO:0000781]; cytosol [GO:0005829]; extracellular exosome [GO:0070062]; nucleoplasm [GO:0005654]; nucleus [GO:0005634]; protein complex [GO:0043234]; telomerase holoenzyme complex [GO:0005697]; DNA polymerase binding [GO:0070182]; Hsp90 protein binding [GO:0051879]; prostaglandin-E synthase activity [GO:0050220]; telomerase activity [GO:0003720]; unfolded protein bind…	chromosome, telomeric region [GO:0000781]; cytosol [GO:0005829]; extracellular exosome [GO:0070062]; nucleoplasm [GO:0005654]; nucleus [GO:0005634]; protein complex [GO:0043234]; telomerase holoenzyme complex [GO:0005697]; DNA polymerase binding [GO:0070182]; Hsp90 protein binding [GO:0051879]; prostaglandin-E synthase activity [GO:0050220]; telomerase activity [GO:0003720]; unfolded protein bind…	Cytosolic prostaglandin synthase that catalyzes the oxidoreduction of prostaglandin endoperoxide H2 (PGH2) to prostaglandin E2 (PGE2) (PubMed:10922363). Molecular chaperone that localizes to genomic response elements in a hormone-dependent manner and disrupts receptor-mediated transcriptional activation, by promoting disassembly of transcriptional regulatory complexes (PubMed:11274138, PubMed:120…	18697	19
NU160_HUMAN	-0.083984	0.0433602	NUP160	NUP160 KIAA0197 NUP120	Nuclear pore complex protein Nup160	-2.15691	-2.04632	0.0526624	0.263318	0.282643	2.35568	20	0.0186794	0.00909665	0.0101064	1436	cytosol [GO:0005829]; nuclear envelope [GO:0005635]; nuclear pore [GO:0005643]; nuclear pore outer ring [GO:0031080]; nucleocytoplasmic transporter activity [GO:0005487]; gene silencing by RNA [GO:0031047]; intracellular transport of virus [GO:0075733]; mitotic nuclear envelope disassembly [GO:0007077]; mRNA export from nucleus [GO:0006406]; protein sumoylation [GO:0016925]; regulation of cellula…	cytosol [GO:0005829]; nuclear envelope [GO:0005635]; nuclear pore [GO:0005643]; nuclear pore outer ring [GO:0031080]; nucleocytoplasmic transporter activity [GO:0005487]; gene silencing by RNA [GO:0031047]; intracellular transport of virus [GO:0075733]; mitotic nuclear envelope disassembly [GO:0007077]; mRNA export from nucleus [GO:0006406]; protein sumoylation [GO:0016925]; regulation of cellula…	cytosol [GO:0005829]; nuclear envelope [GO:0005635]; nuclear pore [GO:0005643]; nuclear pore outer ring [GO:0031080]; nucleocytoplasmic transporter activity [GO:0005487]; gene silencing by RNA [GO:0031047]; intracellular transport of virus [GO:0075733]; mitotic nuclear envelope disassembly [GO:0007077]; mRNA export from nucleus [GO:0006406]; protein sumoylation [GO:0016925]; regulation of cellula…	Involved in poly(A)+ RNA transport. {ECO:0000269|PubMed:11684705}.	162121	162
RFA3_HUMAN	-0.0839903	0.00368923	RPA3	RPA3 REPA3 RPA14	Replication protein A 14 kDa subunit	-3.28646	-2.78065	0.010804	0.12239	0.150594	2.35568	20	0.0186794	0.00391879	0.00547416	121	DNA replication factor A complex [GO:0005662]; nucleoplasm [GO:0005654]; damaged DNA binding [GO:0003684]; single-stranded DNA binding [GO:0003697]; base-excision repair [GO:0006284]; DNA damage response, detection of DNA damage [GO:0042769]; DNA replication [GO:0006260]; double-strand break repair via homologous recombination [GO:0000724]; error-free translesion synthesis [GO:0070987]; error-pro…	DNA replication factor A complex [GO:0005662]; nucleoplasm [GO:0005654]; damaged DNA binding [GO:0003684]; single-stranded DNA binding [GO:0003697]; base-excision repair [GO:0006284]; DNA damage response, detection of DNA damage [GO:0042769]; DNA replication [GO:0006260]; double-strand break repair via homologous recombination [GO:0000724]; error-free translesion synthesis [GO:0070987]; error-pro…	DNA replication factor A complex [GO:0005662]; nucleoplasm [GO:0005654]; damaged DNA binding [GO:0003684]; single-stranded DNA binding [GO:0003697]; base-excision repair [GO:0006284]; DNA damage response, detection of DNA damage [GO:0042769]; DNA replication [GO:0006260]; double-strand break repair via homologous recombination [GO:0000724]; error-free translesion synthesis [GO:0070987]; error-pro…	As part of the heterotrimeric replication protein A complex (RPA/RP-A), binds and stabilizes single-stranded DNA intermediates that form during DNA replication or upon DNA stress. It prevents their reannealing and in parallel, recruits and activates different proteins and complexes involved in DNA metabolism. Thereby, it plays an essential role both in DNA replication and the cellular response to…	13569	14
STIP1_HUMAN	-0.0841123	0.00855958	STIP1	STIP1	Stress-induced-phosphoprotein 1	-2.91514	-2.56797	0.0174174	0.141794	0.177214	2.35568	20	0.0186794	0.00499518	0.00643712	543	Golgi apparatus [GO:0005794]; myelin sheath [GO:0043209]; nucleus [GO:0005634]; protein complex [GO:0043234]; chaperone binding [GO:0051087]; Hsp70 protein binding [GO:0030544]; protein C-terminus binding [GO:0008022]; RNA binding [GO:0003723]; response to stress [GO:0006950]	Golgi apparatus [GO:0005794]; myelin sheath [GO:0043209]; nucleus [GO:0005634]; protein complex [GO:0043234]; chaperone binding [GO:0051087]; Hsp70 protein binding [GO:0030544]; protein C-terminus binding [GO:0008022]; RNA binding [GO:0003723]; response to stress [GO:0006950]	Golgi apparatus [GO:0005794]; myelin sheath [GO:0043209]; nucleus [GO:0005634]; protein complex [GO:0043234]; chaperone binding [GO:0051087]; Hsp70 protein binding [GO:0030544]; protein C-terminus binding [GO:0008022]; RNA binding [GO:0003723]; response to stress [GO:0006950]	Acts as a co-chaperone for HSP90AA1 (PubMed:27353360). Mediates the association of the molecular chaperones HSPA8/HSC70 and HSP90 (By similarity). {ECO:0000250|UniProtKB:O35814, ECO:0000303|PubMed:27353360}.	62639	63
DDX23_HUMAN	-0.0842577	0.049431	DDX23	DDX23	Probable ATP-dependent RNA helicase DDX23	-2.0917	-1.99726	0.0581104	0.277388	0.290612	2.35568	20	0.0186794	0.00973583	0.0106782	820	catalytic step 2 spliceosome [GO:0071013]; extracellular exosome [GO:0070062]; nucleolus [GO:0005730]; nucleoplasm [GO:0005654]; nucleus [GO:0005634]; U5 snRNP [GO:0005682]; ATP binding [GO:0005524]; ATP-dependent RNA helicase activity [GO:0004004]; RNA binding [GO:0003723]; cis assembly of pre-catalytic spliceosome [GO:0000354]; mRNA splicing, via spliceosome [GO:0000398]; RNA secondary structur…	catalytic step 2 spliceosome [GO:0071013]; extracellular exosome [GO:0070062]; nucleolus [GO:0005730]; nucleoplasm [GO:0005654]; nucleus [GO:0005634]; U5 snRNP [GO:0005682]; ATP binding [GO:0005524]; ATP-dependent RNA helicase activity [GO:0004004]; RNA binding [GO:0003723]; cis assembly of pre-catalytic spliceosome [GO:0000354]; mRNA splicing, via spliceosome [GO:0000398]; RNA secondary structur…	catalytic step 2 spliceosome [GO:0071013]; extracellular exosome [GO:0070062]; nucleolus [GO:0005730]; nucleoplasm [GO:0005654]; nucleus [GO:0005634]; U5 snRNP [GO:0005682]; ATP binding [GO:0005524]; ATP-dependent RNA helicase activity [GO:0004004]; RNA binding [GO:0003723]; cis assembly of pre-catalytic spliceosome [GO:0000354]; mRNA splicing, via spliceosome [GO:0000398]; RNA secondary structur…	Involved in pre-mRNA splicing and its phosphorylated form (by SRPK2) is required for spliceosomal B complex formation. {ECO:0000269|PubMed:18425142}.	95583	96
LRC39_HUMAN	-0.0846745	0.00977584	LRRC39	LRRC39 UNQ6500/PRO21368	Leucine-rich repeat-containing protein 39	-2.85554	-2.53617	0.0186847	0.145257	0.182627	2.35568	20	0.0186794	0.00527569	0.00668808	335					38793	39
JSPR1_HUMAN	-0.0859379	0.0105728	JSRP1	JSRP1 JP45	Junctional sarcoplasmic reticulum protein 1	-2.82023	-2.52459	0.019167	0.150268	0.183977	2.35568	20	0.0186794	0.00557123	0.00695247	331	sarcoplasmic reticulum [GO:0016529]; sarcoplasmic reticulum membrane [GO:0033017]; regulation of ryanodine-sensitive calcium-release channel activity [GO:0060314]; skeletal muscle contraction [GO:0003009]	sarcoplasmic reticulum [GO:0016529]; sarcoplasmic reticulum membrane [GO:0033017]; regulation of ryanodine-sensitive calcium-release channel activity [GO:0060314]; skeletal muscle contraction [GO:0003009]	sarcoplasmic reticulum [GO:0016529]; sarcoplasmic reticulum membrane [GO:0033017]; regulation of ryanodine-sensitive calcium-release channel activity [GO:0060314]; skeletal muscle contraction [GO:0003009]	Involved in skeletal muscle excitation/contraction coupling (EC), probably acting as a regulator of the voltage-sensitive calcium channel CACNA1S. EC is a physiological process whereby an electrical signal (depolarization of the plasma membrane) is converted into a chemical signal, a calcium gradient, by the opening of ryanodine receptor calcium release channels. May regulate CACNA1S membrane tar…	36319	36
STAR7_HUMAN	-0.0863588	0.0426988	STARD7	STARD7 GTT1	StAR-related lipid transfer protein 7, mitochondrial	-2.1645	-2.06311	0.0509055	0.262039	0.278992	2.35568	20	0.0186794	0.00955098	0.0105129	370	mitochondrial outer membrane [GO:0005741]; lipid binding [GO:0008289]; phosphatidylcholine biosynthetic process [GO:0006656]; positive regulation of protein targeting to mitochondrion [GO:1903955]	mitochondrial outer membrane [GO:0005741]; lipid binding [GO:0008289]; phosphatidylcholine biosynthetic process [GO:0006656]; positive regulation of protein targeting to mitochondrion [GO:1903955]	mitochondrial outer membrane [GO:0005741]; lipid binding [GO:0008289]; phosphatidylcholine biosynthetic process [GO:0006656]; positive regulation of protein targeting to mitochondrion [GO:1903955]	May play a protective role in mucosal tissues by preventing exaggerated allergic responses. {ECO:0000250|UniProtKB:Q8R1R3}.	43113	43
CA123_HUMAN	-0.0867925	0.0297887	C1orf123	C1orf123	UPF0587 protein C1orf123	-2.33963	-2.19802	0.0385877	0.224371	0.2476	2.35568	20	0.0186794	0.00825696	0.0093552	160	extracellular exosome [GO:0070062]	extracellular exosome [GO:0070062]	extracellular exosome [GO:0070062]		18048	18
PI42B_HUMAN	-0.0875228	0.0258693	PIP4K2B	PIP4K2B PIP5K2B	Phosphatidylinositol 5-phosphate 4-kinase type-2 beta	-2.40692	-2.2516	0.0344962	0.212596	0.234069	2.35568	20	0.0186794	0.00793363	0.00906594	416	autophagosome [GO:0005776]; cytosol [GO:0005829]; endoplasmic reticulum membrane [GO:0005789]; nucleoplasm [GO:0005654]; plasma membrane [GO:0005886]; 1-phosphatidylinositol-3-phosphate 4-kinase activity [GO:0052811]; 1-phosphatidylinositol-4-phosphate 5-kinase activity [GO:0016308]; 1-phosphatidylinositol-5-phosphate 4-kinase activity [GO:0016309]; ATP binding [GO:0005524]; protein homodimerizat…	autophagosome [GO:0005776]; cytosol [GO:0005829]; endoplasmic reticulum membrane [GO:0005789]; nucleoplasm [GO:0005654]; plasma membrane [GO:0005886]; 1-phosphatidylinositol-3-phosphate 4-kinase activity [GO:0052811]; 1-phosphatidylinositol-4-phosphate 5-kinase activity [GO:0016308]; 1-phosphatidylinositol-5-phosphate 4-kinase activity [GO:0016309]; ATP binding [GO:0005524]; protein homodimerizat…	autophagosome [GO:0005776]; cytosol [GO:0005829]; endoplasmic reticulum membrane [GO:0005789]; nucleoplasm [GO:0005654]; plasma membrane [GO:0005886]; 1-phosphatidylinositol-3-phosphate 4-kinase activity [GO:0052811]; 1-phosphatidylinositol-4-phosphate 5-kinase activity [GO:0016308]; 1-phosphatidylinositol-5-phosphate 4-kinase activity [GO:0016309]; ATP binding [GO:0005524]; protein homodimerizat…	Participates in the biosynthesis of phosphatidylinositol 4,5-bisphosphate. {ECO:0000269|PubMed:9038203}.	47378	47
CA2D1_HUMAN	-0.0875763	0.0393066	CACNA2D1	CACNA2D1 CACNL2A CCHL2A MHS3	Voltage-dependent calcium channel subunit alpha-2/delta-1	-2.20524	-2.1001	0.0472177	0.253148	0.271153	2.35568	20	0.0186794	0.00946267	0.0104339	1103	extracellular exosome [GO:0070062]; L-type voltage-gated calcium channel complex [GO:1990454]; plasma membrane [GO:0005886]; sarcoplasmic reticulum [GO:0016529]; voltage-gated calcium channel complex [GO:0005891]; metal ion binding [GO:0046872]; voltage-gated calcium channel activity [GO:0005245]; calcium ion import across plasma membrane [GO:0098703]; calcium ion transmembrane transport via high…	extracellular exosome [GO:0070062]; L-type voltage-gated calcium channel complex [GO:1990454]; plasma membrane [GO:0005886]; sarcoplasmic reticulum [GO:0016529]; voltage-gated calcium channel complex [GO:0005891]; metal ion binding [GO:0046872]; voltage-gated calcium channel activity [GO:0005245]; calcium ion import across plasma membrane [GO:0098703]; calcium ion transmembrane transport via high…	extracellular exosome [GO:0070062]; L-type voltage-gated calcium channel complex [GO:1990454]; plasma membrane [GO:0005886]; sarcoplasmic reticulum [GO:0016529]; voltage-gated calcium channel complex [GO:0005891]; metal ion binding [GO:0046872]; voltage-gated calcium channel activity [GO:0005245]; calcium ion import across plasma membrane [GO:0098703]; calcium ion transmembrane transport via high…	The alpha-2/delta subunit of voltage-dependent calcium channels regulates calcium current density and activation/inactivation kinetics of the calcium channel. Plays an important role in excitation-contraction coupling (By similarity). {ECO:0000250}.	124568	125
TMOD1_HUMAN	-0.0878813	0.00934163	TMOD1	TMOD1 D9S57E TMOD	Tropomodulin-1	-2.87596	-2.57651	0.0170909	0.143143	0.17675	2.35568	20	0.0186794	0.00560246	0.00698042	359	actin filament [GO:0005884]; cortical cytoskeleton [GO:0030863]; cytosol [GO:0005829]; membrane [GO:0016020]; myofibril [GO:0030016]; sarcomere [GO:0030017]; actin binding [GO:0003779]; actin filament binding [GO:0051015]; tropomyosin binding [GO:0005523]; adult locomotory behavior [GO:0008344]; lens fiber cell development [GO:0070307]; muscle filament sliding [GO:0030049]; myofibril assembly [GO…	actin filament [GO:0005884]; cortical cytoskeleton [GO:0030863]; cytosol [GO:0005829]; membrane [GO:0016020]; myofibril [GO:0030016]; sarcomere [GO:0030017]; actin binding [GO:0003779]; actin filament binding [GO:0051015]; tropomyosin binding [GO:0005523]; adult locomotory behavior [GO:0008344]; lens fiber cell development [GO:0070307]; muscle filament sliding [GO:0030049]; myofibril assembly [GO…	actin filament [GO:0005884]; cortical cytoskeleton [GO:0030863]; cytosol [GO:0005829]; membrane [GO:0016020]; myofibril [GO:0030016]; sarcomere [GO:0030017]; actin binding [GO:0003779]; actin filament binding [GO:0051015]; tropomyosin binding [GO:0005523]; adult locomotory behavior [GO:0008344]; lens fiber cell development [GO:0070307]; muscle filament sliding [GO:0030049]; myofibril assembly [GO…	Blocks the elongation and depolymerization of the actin filaments at the pointed end. The Tmod/TM complex contributes to the formation of the short actin protofilament, which in turn defines the geometry of the membrane skeleton. May play an important role in regulating the organization of actin filaments by preferentially binding to a specific tropomyosin isoform at its N-terminus. {ECO:0000269|…	40569	41
HSPB8_HUMAN	-0.0879396	0.0328454	HSPB8	HSPB8 CRYAC E2IG1 HSP22 PP1629	Heat shock protein beta-8	-2.29263	-2.16866	0.0410119	0.23409	0.255801	2.35568	20	0.0186794	0.00882783	0.00986591	196	cytoplasm [GO:0005737]; cytosol [GO:0005829]; intracellular [GO:0005622]; nucleoplasm [GO:0005654]; nucleus [GO:0005634]; identical protein binding [GO:0042802]; regulation of cellular response to heat [GO:1900034]	cytoplasm [GO:0005737]; cytosol [GO:0005829]; intracellular [GO:0005622]; nucleoplasm [GO:0005654]; nucleus [GO:0005634]; identical protein binding [GO:0042802]; regulation of cellular response to heat [GO:1900034]	cytoplasm [GO:0005737]; cytosol [GO:0005829]; intracellular [GO:0005622]; nucleoplasm [GO:0005654]; nucleus [GO:0005634]; identical protein binding [GO:0042802]; regulation of cellular response to heat [GO:1900034]	Displays temperature-dependent chaperone activity.	21604	22
STT3A_HUMAN	-0.0880862	0.040216	STT3A	STT3A ITM1 TMC	Dolichyl-diphosphooligosaccharide--protein glycosyltransferase subunit STT3A	-2.19401	-2.09368	0.0478404	0.256044	0.272582	2.35568	20	0.0186794	0.00967139	0.0106206	705	endoplasmic reticulum membrane [GO:0005789]; integral component of membrane [GO:0016021]; membrane [GO:0016020]; oligosaccharyltransferase complex [GO:0008250]; dolichyl-diphosphooligosaccharide-protein glycotransferase activity [GO:0004579]; metal ion binding [GO:0046872]; co-translational protein modification [GO:0043686]; post-translational protein modification [GO:0043687]; protein N-linked g…	endoplasmic reticulum membrane [GO:0005789]; integral component of membrane [GO:0016021]; membrane [GO:0016020]; oligosaccharyltransferase complex [GO:0008250]; dolichyl-diphosphooligosaccharide-protein glycotransferase activity [GO:0004579]; metal ion binding [GO:0046872]; co-translational protein modification [GO:0043686]; post-translational protein modification [GO:0043687]; protein N-linked g…	endoplasmic reticulum membrane [GO:0005789]; integral component of membrane [GO:0016021]; membrane [GO:0016020]; oligosaccharyltransferase complex [GO:0008250]; dolichyl-diphosphooligosaccharide-protein glycotransferase activity [GO:0004579]; metal ion binding [GO:0046872]; co-translational protein modification [GO:0043686]; post-translational protein modification [GO:0043687]; protein N-linked g…	Catalytic subunit of the N-oligosaccharyl transferase (OST) complex which catalyzes the transfer of a high mannose oligosaccharide from a lipid-linked oligosaccharide donor to an asparagine residue within an Asn-X-Ser/Thr consensus motif in nascent polypeptide chains. N-glycosylation occurs cotranslationally and the complex associates with the Sec61 complex at the channel-forming translocon compl…	80530	81
DYLT1_HUMAN	-0.0884198	0.0498611	DYNLT1	DYNLT1 TCTEL1 TCTEX-1 TCTEX1	Dynein light chain Tctex-type 1	-2.08736	-2.01093	0.056544	0.278169	0.288046	2.35568	20	0.0186794	0.010766	0.0115999	113	cytoplasmic dynein complex [GO:0005868]; cytoplasmic microtubule [GO:0005881]; extracellular region [GO:0005576]; ficolin-1-rich granule lumen [GO:1904813]; Golgi apparatus [GO:0005794]; host cell [GO:0043657]; secretory granule lumen [GO:0034774]; secretory vesicle [GO:0099503]; spindle [GO:0005819]; identical protein binding [GO:0042802]; motor activity [GO:0003774]; cell division [GO:0051301];…	cytoplasmic dynein complex [GO:0005868]; cytoplasmic microtubule [GO:0005881]; extracellular region [GO:0005576]; ficolin-1-rich granule lumen [GO:1904813]; Golgi apparatus [GO:0005794]; host cell [GO:0043657]; secretory granule lumen [GO:0034774]; secretory vesicle [GO:0099503]; spindle [GO:0005819]; identical protein binding [GO:0042802]; motor activity [GO:0003774]; cell division [GO:0051301];…	cytoplasmic dynein complex [GO:0005868]; cytoplasmic microtubule [GO:0005881]; extracellular region [GO:0005576]; ficolin-1-rich granule lumen [GO:1904813]; Golgi apparatus [GO:0005794]; host cell [GO:0043657]; secretory granule lumen [GO:0034774]; secretory vesicle [GO:0099503]; spindle [GO:0005819]; identical protein binding [GO:0042802]; motor activity [GO:0003774]; cell division [GO:0051301];…	Acts as one of several non-catalytic accessory components of the cytoplasmic dynein 1 complex that are thought to be involved in linking dynein to cargos and to adapter proteins that regulate dynein function. Cytoplasmic dynein 1 acts as a motor for the intracellular retrograde motility of vesicles and organelles along microtubules. Binds to transport cargos and is involved in apical cargo transp…	12452	12
SF3B3_HUMAN	-0.0889203	0.00063789	SF3B3	SF3B3 KIAA0017 SAP130	Splicing factor 3B subunit 3	-4.04188	-3.22328	0.00385685	0.109714	0.113787	2.35568	20	0.0186794	0.00290393	0.00456623	1217	catalytic step 2 spliceosome [GO:0071013]; nucleolus [GO:0005730]; nucleoplasm [GO:0005654]; nucleus [GO:0005634]; small nuclear ribonucleoprotein complex [GO:0030532]; spliceosomal complex [GO:0005681]; U12-type spliceosomal complex [GO:0005689]; protein complex binding [GO:0032403]; RNA binding [GO:0003723]; mRNA processing [GO:0006397]; mRNA splicing, via spliceosome [GO:0000398]; negative reg…	catalytic step 2 spliceosome [GO:0071013]; nucleolus [GO:0005730]; nucleoplasm [GO:0005654]; nucleus [GO:0005634]; small nuclear ribonucleoprotein complex [GO:0030532]; spliceosomal complex [GO:0005681]; U12-type spliceosomal complex [GO:0005689]; protein complex binding [GO:0032403]; RNA binding [GO:0003723]; mRNA processing [GO:0006397]; mRNA splicing, via spliceosome [GO:0000398]; negative reg…	catalytic step 2 spliceosome [GO:0071013]; nucleolus [GO:0005730]; nucleoplasm [GO:0005654]; nucleus [GO:0005634]; small nuclear ribonucleoprotein complex [GO:0030532]; spliceosomal complex [GO:0005681]; U12-type spliceosomal complex [GO:0005689]; protein complex binding [GO:0032403]; RNA binding [GO:0003723]; mRNA processing [GO:0006397]; mRNA splicing, via spliceosome [GO:0000398]; negative reg…	Subunit of the splicing factor SF3B required for 'A' complex assembly formed by the stable binding of U2 snRNP to the branchpoint sequence (BPS) in pre-mRNA. Sequence independent binding of SF3A/SF3B complex upstream of the branch site is essential, it may anchor U2 snRNP to the pre-mRNA. May also be involved in the assembly of the 'E' complex. Belongs also to the minor U12-dependent spliceosome,…	135577	136
BIRC6_HUMAN	-0.0889547	0.0499749	BIRC6	BIRC6 KIAA1289	Baculoviral IAP repeat-containing protein 6	-2.08622	-2.01207	0.0564161	0.278169	0.288046	2.35568	20	0.0186794	0.0109086	0.0117275	4857	endosome [GO:0005768]; Golgi apparatus [GO:0005794]; intracellular membrane-bounded organelle [GO:0043231]; membrane [GO:0016020]; microtubule organizing center [GO:0005815]; midbody [GO:0030496]; spindle pole [GO:0000922]; trans-Golgi network [GO:0005802]; cysteine-type endopeptidase inhibitor activity [GO:0004869]; ubiquitin conjugating enzyme activity [GO:0061631]; ubiquitin-protein transferas…	endosome [GO:0005768]; Golgi apparatus [GO:0005794]; intracellular membrane-bounded organelle [GO:0043231]; membrane [GO:0016020]; microtubule organizing center [GO:0005815]; midbody [GO:0030496]; spindle pole [GO:0000922]; trans-Golgi network [GO:0005802]; cysteine-type endopeptidase inhibitor activity [GO:0004869]; ubiquitin conjugating enzyme activity [GO:0061631]; ubiquitin-protein transferas…	endosome [GO:0005768]; Golgi apparatus [GO:0005794]; intracellular membrane-bounded organelle [GO:0043231]; membrane [GO:0016020]; microtubule organizing center [GO:0005815]; midbody [GO:0030496]; spindle pole [GO:0000922]; trans-Golgi network [GO:0005802]; cysteine-type endopeptidase inhibitor activity [GO:0004869]; ubiquitin conjugating enzyme activity [GO:0061631]; ubiquitin-protein transferas…	Anti-apoptotic protein which can regulate cell death by controlling caspases and by acting as an E3 ubiquitin-protein ligase. Has an unusual ubiquitin conjugation system in that it could combine in a single polypeptide, ubiquitin conjugating (E2) with ubiquitin ligase (E3) activity, forming a chimeric E2/E3 ubiquitin ligase. Its tragets include CASP9 and DIABLO/SMAC. Acts as an inhibitor of CASP3…	530255	530
SHC1_HUMAN	-0.0892391	0.0429339	SHC1	SHC1 SHC SHCA	SHC-transforming protein 1	-2.16179	-2.07334	0.04986	0.262308	0.275917	2.35568	20	0.0186794	0.0102243	0.0111153	583	cytosol [GO:0005829]; mitochondrial matrix [GO:0005759]; plasma membrane [GO:0005886]; Shc-EGFR complex [GO:0070435]; ephrin receptor binding [GO:0046875]; epidermal growth factor binding [GO:0048408]; epidermal growth factor receptor binding [GO:0005154]; insulin receptor binding [GO:0005158]; insulin-like growth factor receptor binding [GO:0005159]; neurotrophin TRKA receptor binding [GO:000516…	cytosol [GO:0005829]; mitochondrial matrix [GO:0005759]; plasma membrane [GO:0005886]; Shc-EGFR complex [GO:0070435]; ephrin receptor binding [GO:0046875]; epidermal growth factor binding [GO:0048408]; epidermal growth factor receptor binding [GO:0005154]; insulin receptor binding [GO:0005158]; insulin-like growth factor receptor binding [GO:0005159]; neurotrophin TRKA receptor binding [GO:000516…	cytosol [GO:0005829]; mitochondrial matrix [GO:0005759]; plasma membrane [GO:0005886]; Shc-EGFR complex [GO:0070435]; ephrin receptor binding [GO:0046875]; epidermal growth factor binding [GO:0048408]; epidermal growth factor receptor binding [GO:0005154]; insulin receptor binding [GO:0005158]; insulin-like growth factor receptor binding [GO:0005159]; neurotrophin TRKA receptor binding [GO:000516…	Signaling adapter that couples activated growth factor receptors to signaling pathways. Participates in a signaling cascade initiated by activated KIT and KITLG/SCF. Isoform p46Shc and isoform p52Shc, once phosphorylated, couple activated receptor tyrosine kinases to Ras via the recruitment of the GRB2/SOS complex and are implicated in the cytoplasmic propagation of mitogenic signals. Isoform p46…	62822	63
NSMA3_HUMAN	-0.0893347	0.00603544	SMPD4	SMPD4 KIAA1418	Sphingomyelin phosphodiesterase 4	-3.07047	-2.71165	0.0126325	0.13556	0.157147	2.35568	20	0.0186794	0.00507905	0.00651215	827	endoplasmic reticulum [GO:0005783]; endoplasmic reticulum membrane [GO:0005789]; Golgi apparatus [GO:0005794]; Golgi membrane [GO:0000139]; integral component of membrane [GO:0016021]; trans-Golgi network [GO:0005802]; metal ion binding [GO:0046872]; sphingomyelin phosphodiesterase activity [GO:0004767]; sphingomyelin phosphodiesterase D activity [GO:0050290]; cellular response to tumor necrosis …	endoplasmic reticulum [GO:0005783]; endoplasmic reticulum membrane [GO:0005789]; Golgi apparatus [GO:0005794]; Golgi membrane [GO:0000139]; integral component of membrane [GO:0016021]; trans-Golgi network [GO:0005802]; metal ion binding [GO:0046872]; sphingomyelin phosphodiesterase activity [GO:0004767]; sphingomyelin phosphodiesterase D activity [GO:0050290]; cellular response to tumor necrosis …	endoplasmic reticulum [GO:0005783]; endoplasmic reticulum membrane [GO:0005789]; Golgi apparatus [GO:0005794]; Golgi membrane [GO:0000139]; integral component of membrane [GO:0016021]; trans-Golgi network [GO:0005802]; metal ion binding [GO:0046872]; sphingomyelin phosphodiesterase activity [GO:0004767]; sphingomyelin phosphodiesterase D activity [GO:0050290]; cellular response to tumor necrosis …	Catalyzes the hydrolysis of membrane sphingomyelin to form phosphorylcholine and ceramide. {ECO:0000269|PubMed:16517606}.	93352	93
ANXA6_HUMAN	-0.0896974	0.00875795	ANXA6	ANXA6 ANX6	Annexin A6	-2.90489	-2.61004	0.0158639	0.142242	0.171515	2.35568	20	0.0186794	0.00572075	0.00708623	673	extracellular exosome [GO:0070062]; focal adhesion [GO:0005925]; late endosome membrane [GO:0031902]; lysosomal membrane [GO:0005765]; melanosome [GO:0042470]; membrane [GO:0016020]; mitochondrion [GO:0005739]; perinuclear region of cytoplasm [GO:0048471]; calcium ion binding [GO:0005509]; calcium-dependent phospholipid binding [GO:0005544]; calcium-dependent protein binding [GO:0048306]; cholest…	extracellular exosome [GO:0070062]; focal adhesion [GO:0005925]; late endosome membrane [GO:0031902]; lysosomal membrane [GO:0005765]; melanosome [GO:0042470]; membrane [GO:0016020]; mitochondrion [GO:0005739]; perinuclear region of cytoplasm [GO:0048471]; calcium ion binding [GO:0005509]; calcium-dependent phospholipid binding [GO:0005544]; calcium-dependent protein binding [GO:0048306]; cholest…	extracellular exosome [GO:0070062]; focal adhesion [GO:0005925]; late endosome membrane [GO:0031902]; lysosomal membrane [GO:0005765]; melanosome [GO:0042470]; membrane [GO:0016020]; mitochondrion [GO:0005739]; perinuclear region of cytoplasm [GO:0048471]; calcium ion binding [GO:0005509]; calcium-dependent phospholipid binding [GO:0005544]; calcium-dependent protein binding [GO:0048306]; cholest…	May associate with CD21. May regulate the release of Ca(2+) from intracellular stores.	75873	76
THUM1_HUMAN	-0.0902083	0.0448944	THUMPD1	THUMPD1	THUMP domain-containing protein 1	-2.13968	-2.05968	0.0512597	0.267066	0.279921	2.35568	20	0.0186794	0.0106647	0.0115092	353	nucleoplasm [GO:0005654]; RNA binding [GO:0003723]; rRNA modification [GO:0000154]; tRNA modification [GO:0006400]	nucleoplasm [GO:0005654]; RNA binding [GO:0003723]; rRNA modification [GO:0000154]; tRNA modification [GO:0006400]	nucleoplasm [GO:0005654]; RNA binding [GO:0003723]; rRNA modification [GO:0000154]; tRNA modification [GO:0006400]	Functions as a tRNA-binding adapter to mediate NAT10-dependent tRNA acetylation (PubMed:25653167). {ECO:0000269|PubMed:25653167}.	39315	39
TPR_HUMAN	-0.0908601	0.000733721	TPR	TPR	Nucleoprotein TPR	-3.98202	-3.22485	0.00384248	0.110441	0.113787	2.35568	20	0.0186794	0.00312385	0.00476298	2363	cytoplasm [GO:0005737]; cytoplasmic dynein complex [GO:0005868]; extrinsic component of membrane [GO:0019898]; kinetochore [GO:0000776]; mitotic spindle [GO:0072686]; nuclear envelope [GO:0005635]; nuclear inclusion body [GO:0042405]; nuclear membrane [GO:0031965]; nuclear periphery [GO:0034399]; nuclear pore [GO:0005643]; nuclear pore nuclear basket [GO:0044615]; nucleoplasm [GO:0005654]; nucleu…	cytoplasm [GO:0005737]; cytoplasmic dynein complex [GO:0005868]; extrinsic component of membrane [GO:0019898]; kinetochore [GO:0000776]; mitotic spindle [GO:0072686]; nuclear envelope [GO:0005635]; nuclear inclusion body [GO:0042405]; nuclear membrane [GO:0031965]; nuclear periphery [GO:0034399]; nuclear pore [GO:0005643]; nuclear pore nuclear basket [GO:0044615]; nucleoplasm [GO:0005654]; nucleu…	cytoplasm [GO:0005737]; cytoplasmic dynein complex [GO:0005868]; extrinsic component of membrane [GO:0019898]; kinetochore [GO:0000776]; mitotic spindle [GO:0072686]; nuclear envelope [GO:0005635]; nuclear inclusion body [GO:0042405]; nuclear membrane [GO:0031965]; nuclear periphery [GO:0034399]; nuclear pore [GO:0005643]; nuclear pore nuclear basket [GO:0044615]; nucleoplasm [GO:0005654]; nucleu…	Component of the nuclear pore complex (NPC), a complex required for the trafficking across the nuclear envelope. Functions as a scaffolding element in the nuclear phase of the NPC essential for normal nucleocytoplasmic transport of proteins and mRNAs, plays a role in the establishment of nuclear-peripheral chromatin compartmentalization in interphase, and in the mitotic spindle checkpoint signali…	267293	267
HS71A_HUMAN	-0.091007	0.0427598	HSPA1A	HSPA1A HSP72 HSPA1 HSX70	Heat shock 70 kDa protein 1A	-2.1638	-2.08204	0.0489867	0.262085	0.274664	2.35568	20	0.0186794	0.0106137	0.0114636	641	aggresome [GO:0016235]; blood microparticle [GO:0072562]; centriole [GO:0005814]; centrosome [GO:0005813]; cytoplasm [GO:0005737]; cytosol [GO:0005829]; endoplasmic reticulum [GO:0005783]; extracellular exosome [GO:0070062]; extracellular region [GO:0005576]; ficolin-1-rich granule lumen [GO:1904813]; focal adhesion [GO:0005925]; inclusion body [GO:0016234]; intracellular ribonucleoprotein comple…	ATPase activity [GO:0016887]; ATPase activity, coupled [GO:0042623]; ATP binding [GO:0005524]; C3HC4-type RING finger domain binding [GO:0055131]; cadherin binding [GO:0045296]; denatured protein binding [GO:0031249]; disordered domain specific binding [GO:0097718]; enzyme binding [GO:0019899]; G-protein coupled receptor binding [GO:0001664]; heat shock protein binding [GO:0031072]; histone deace…	ATP metabolic process [GO:0046034]; cellular heat acclimation [GO:0070370]; cellular response to heat [GO:0034605]; cellular response to oxidative stress [GO:0034599]; chaperone-mediated protein complex assembly [GO:0051131]; mRNA catabolic process [GO:0006402]; negative regulation of apoptotic process [GO:0043066]; negative regulation of cell death [GO:0060548]; negative regulation of cell growt…	Molecular chaperone implicated in a wide variety of cellular processes, including protection of the proteome from stress, folding and transport of newly synthesized polypeptides, activation of proteolysis of misfolded proteins and the formation and dissociation of protein complexes. Plays a pivotal role in the protein quality control system, ensuring the correct folding of proteins, the re-foldin…	70052	70
ELYS_HUMAN	-0.0910102	0.0272634	AHCTF1	AHCTF1 ELYS TMBS62 MSTP108	Protein ELYS	-2.38196	-2.25141	0.03451	0.215363	0.234069	2.35568	20	0.0186794	0.00875915	0.00980447	2266	condensed chromosome kinetochore [GO:0000777]; cytosol [GO:0005829]; extracellular exosome [GO:0070062]; nuclear matrix [GO:0016363]; nuclear membrane [GO:0031965]; nuclear periphery [GO:0034399]; nuclear pore [GO:0005643]; nucleoplasm [GO:0005654]; nucleus [GO:0005634]; DNA binding [GO:0003677]; transcription factor activity, sequence-specific DNA binding [GO:0003700]; cytokinesis [GO:0000910]; …	condensed chromosome kinetochore [GO:0000777]; cytosol [GO:0005829]; extracellular exosome [GO:0070062]; nuclear matrix [GO:0016363]; nuclear membrane [GO:0031965]; nuclear periphery [GO:0034399]; nuclear pore [GO:0005643]; nucleoplasm [GO:0005654]; nucleus [GO:0005634]; DNA binding [GO:0003677]; transcription factor activity, sequence-specific DNA binding [GO:0003700]; cytokinesis [GO:0000910]; …	condensed chromosome kinetochore [GO:0000777]; cytosol [GO:0005829]; extracellular exosome [GO:0070062]; nuclear matrix [GO:0016363]; nuclear membrane [GO:0031965]; nuclear periphery [GO:0034399]; nuclear pore [GO:0005643]; nucleoplasm [GO:0005654]; nucleus [GO:0005634]; DNA binding [GO:0003677]; transcription factor activity, sequence-specific DNA binding [GO:0003700]; cytokinesis [GO:0000910]; …	Required for the assembly of a functional nuclear pore complex (NPC) on the surface of chromosomes as nuclei form at the end of mitosis. May initiate NPC assembly by binding to chromatin and recruiting the Nup107-160 subcomplex of the NPC. Also required for the localization of the Nup107-160 subcomplex of the NPC to the kinetochore during mitosis and for the completion of cytokinesis. {ECO:000026…	252498	252
HDGF_HUMAN	-0.0921148	0.0148224	HDGF	HDGF HMG1L2	Hepatoma-derived growth factor	-2.66655	-2.46572	0.0218047	0.169052	0.195264	2.35568	20	0.0186794	0.00715998	0.00837381	240	cytoplasm [GO:0005737]; extracellular space [GO:0005615]; nucleoplasm [GO:0005654]; transcriptional repressor complex [GO:0017053]; DNA binding [GO:0003677]; growth factor activity [GO:0008083]; heparin binding [GO:0008201]; nucleotide binding [GO:0000166]; RNA binding [GO:0003723]; RNA polymerase II transcription corepressor activity [GO:0001106]; transcription corepressor binding [GO:0001222]; …	cytoplasm [GO:0005737]; extracellular space [GO:0005615]; nucleoplasm [GO:0005654]; transcriptional repressor complex [GO:0017053]; DNA binding [GO:0003677]; growth factor activity [GO:0008083]; heparin binding [GO:0008201]; nucleotide binding [GO:0000166]; RNA binding [GO:0003723]; RNA polymerase II transcription corepressor activity [GO:0001106]; transcription corepressor binding [GO:0001222]; …	cytoplasm [GO:0005737]; extracellular space [GO:0005615]; nucleoplasm [GO:0005654]; transcriptional repressor complex [GO:0017053]; DNA binding [GO:0003677]; growth factor activity [GO:0008083]; heparin binding [GO:0008201]; nucleotide binding [GO:0000166]; RNA binding [GO:0003723]; RNA polymerase II transcription corepressor activity [GO:0001106]; transcription corepressor binding [GO:0001222]; …	Heparin-binding protein, with mitogenic activity for fibroblasts. Acts as a transcriptional repressor. {ECO:0000269|PubMed:17974029}.	26788	27
LSM4_HUMAN	-0.0921993	0.0392223	LSM4	LSM4	U6 snRNA-associated Sm-like protein LSm4	-2.20629	-2.12057	0.0452813	0.253148	0.265468	2.35568	20	0.0186794	0.0104781	0.0113423	139	cytosol [GO:0005829]; membrane [GO:0016020]; neuron projection [GO:0043005]; nucleoplasm [GO:0005654]; P-body [GO:0000932]; protein complex [GO:0043234]; spliceosomal complex [GO:0005681]; spliceosomal tri-snRNP complex [GO:0097526]; U6 snRNP [GO:0005688]; PH domain binding [GO:0042731]; RNA binding [GO:0003723]; U6 snRNA binding [GO:0017070]; cytoplasmic mRNA processing body assembly [GO:0033962…	cytosol [GO:0005829]; membrane [GO:0016020]; neuron projection [GO:0043005]; nucleoplasm [GO:0005654]; P-body [GO:0000932]; protein complex [GO:0043234]; spliceosomal complex [GO:0005681]; spliceosomal tri-snRNP complex [GO:0097526]; U6 snRNP [GO:0005688]; PH domain binding [GO:0042731]; RNA binding [GO:0003723]; U6 snRNA binding [GO:0017070]; cytoplasmic mRNA processing body assembly [GO:0033962…	cytosol [GO:0005829]; membrane [GO:0016020]; neuron projection [GO:0043005]; nucleoplasm [GO:0005654]; P-body [GO:0000932]; protein complex [GO:0043234]; spliceosomal complex [GO:0005681]; spliceosomal tri-snRNP complex [GO:0097526]; U6 snRNP [GO:0005688]; PH domain binding [GO:0042731]; RNA binding [GO:0003723]; U6 snRNA binding [GO:0017070]; cytoplasmic mRNA processing body assembly [GO:0033962…	Binds specifically to the 3'-terminal U-tract of U6 snRNA.	15350	15
TCP4_HUMAN	-0.0923959	0.0010202	SUB1	SUB1 PC4 RPO2TC1	Activated RNA polymerase II transcriptional coactivator p15	-3.84095	-3.17712	0.00430227	0.110441	0.115884	2.35568	20	0.0186794	0.00347199	0.00507444	127	extracellular exosome [GO:0070062]; nucleolus [GO:0005730]; nucleus [GO:0005634]; transcription factor complex [GO:0005667]; RNA binding [GO:0003723]; single-stranded DNA binding [GO:0003697]; transcription coactivator activity [GO:0003713]; transcriptional activator activity, RNA polymerase II distal enhancer sequence-specific binding [GO:0001205]; positive regulation of transcription initiation…	extracellular exosome [GO:0070062]; nucleolus [GO:0005730]; nucleus [GO:0005634]; transcription factor complex [GO:0005667]; RNA binding [GO:0003723]; single-stranded DNA binding [GO:0003697]; transcription coactivator activity [GO:0003713]; transcriptional activator activity, RNA polymerase II distal enhancer sequence-specific binding [GO:0001205]; positive regulation of transcription initiation…	extracellular exosome [GO:0070062]; nucleolus [GO:0005730]; nucleus [GO:0005634]; transcription factor complex [GO:0005667]; RNA binding [GO:0003723]; single-stranded DNA binding [GO:0003697]; transcription coactivator activity [GO:0003713]; transcriptional activator activity, RNA polymerase II distal enhancer sequence-specific binding [GO:0001205]; positive regulation of transcription initiation…	General coactivator that functions cooperatively with TAFs and mediates functional interactions between upstream activators and the general transcriptional machinery. May be involved in stabilizing the multiprotein transcription complex. Binds single-stranded DNA. Also binds, in vitro, non-specifically to double-stranded DNA (ds DNA). {ECO:0000269|PubMed:16605275, ECO:0000269|PubMed:16689930, ECO…	14395	14
MECP2_HUMAN	-0.0928701	0.0137361	MECP2	MECP2	Methyl-CpG-binding protein 2	-2.70139	-2.4951	0.0204487	0.164679	0.18974	2.35568	20	0.0186794	0.00709135	0.00831241	486	cytosol [GO:0005829]; extracellular space [GO:0005615]; heterochromatin [GO:0000792]; mitochondrion [GO:0005739]; nucleus [GO:0005634]; postsynapse [GO:0098794]; chromatin binding [GO:0003682]; DNA binding [GO:0003677]; double-stranded methylated DNA binding [GO:0010385]; histone deacetylase binding [GO:0042826]; methyl-CpG binding [GO:0008327]; mRNA binding [GO:0003729]; protein domain specific …	cytosol [GO:0005829]; extracellular space [GO:0005615]; heterochromatin [GO:0000792]; mitochondrion [GO:0005739]; nucleus [GO:0005634]; postsynapse [GO:0098794]; chromatin binding [GO:0003682]; DNA binding [GO:0003677]; double-stranded methylated DNA binding [GO:0010385]; histone deacetylase binding [GO:0042826]; methyl-CpG binding [GO:0008327]; mRNA binding [GO:0003729]; protein domain specific …	cytosol [GO:0005829]; extracellular space [GO:0005615]; heterochromatin [GO:0000792]; mitochondrion [GO:0005739]; nucleus [GO:0005634]; postsynapse [GO:0098794]; chromatin binding [GO:0003682]; DNA binding [GO:0003677]; double-stranded methylated DNA binding [GO:0010385]; histone deacetylase binding [GO:0042826]; methyl-CpG binding [GO:0008327]; mRNA binding [GO:0003729]; protein domain specific …	Chromosomal protein that binds to methylated DNA. It can bind specifically to a single methyl-CpG pair. It is not influenced by sequences flanking the methyl-CpGs. Mediates transcriptional repression through interaction with histone deacetylase and the corepressor SIN3A. Binds both 5-methylcytosine (5mC) and 5-hydroxymethylcytosine (5hmC)-containing DNA, with a preference for 5-methylcytosine (5m…	52441	52
TM222_HUMAN	-0.0930505	0.027319	TMEM222	TMEM222 C1orf160	Transmembrane protein 222	-2.38099	-2.26053	0.0338539	0.215363	0.23306	2.35568	20	0.0186794	0.00916374	0.0101664	208	integral component of membrane [GO:0016021]	integral component of membrane [GO:0016021]	integral component of membrane [GO:0016021]		23230	23
DNJB4_HUMAN	-0.0931486	0.0479022	DNAJB4	DNAJB4 DNAJW HLJ1	DnaJ homolog subfamily B member 4	-2.10741	-2.04445	0.0528618	0.273534	0.282721	2.35568	20	0.0186794	0.0117222	0.0124553	337	cytosol [GO:0005829]; extracellular exosome [GO:0070062]; plasma membrane [GO:0005886]; ATPase activator activity [GO:0001671]; chaperone binding [GO:0051087]; unfolded protein binding [GO:0051082]; protein folding [GO:0006457]; response to heat [GO:0009408]; response to unfolded protein [GO:0006986]	cytosol [GO:0005829]; extracellular exosome [GO:0070062]; plasma membrane [GO:0005886]; ATPase activator activity [GO:0001671]; chaperone binding [GO:0051087]; unfolded protein binding [GO:0051082]; protein folding [GO:0006457]; response to heat [GO:0009408]; response to unfolded protein [GO:0006986]	cytosol [GO:0005829]; extracellular exosome [GO:0070062]; plasma membrane [GO:0005886]; ATPase activator activity [GO:0001671]; chaperone binding [GO:0051087]; unfolded protein binding [GO:0051082]; protein folding [GO:0006457]; response to heat [GO:0009408]; response to unfolded protein [GO:0006986]	Probable chaperone. Stimulates ATP hydrolysis and the folding of unfolded proteins mediated by HSPA1A/B (in vitro) (PubMed:24318877). {ECO:0000269|PubMed:24318877}.	37807	38
UBE2F_HUMAN	-0.0935805	0.0220752	UBE2F	UBE2F NCE2	NEDD8-conjugating enzyme UBE2F	-2.48177	-2.33947	0.0286345	0.196093	0.219124	2.35568	20	0.0186794	0.00853096	0.00960033	185	cytoplasm [GO:0005737]; ATP binding [GO:0005524]; NEDD8 transferase activity [GO:0019788]; ubiquitin protein ligase activity [GO:0061630]; ubiquitin protein ligase binding [GO:0031625]; protein neddylation [GO:0045116]	cytoplasm [GO:0005737]; ATP binding [GO:0005524]; NEDD8 transferase activity [GO:0019788]; ubiquitin protein ligase activity [GO:0061630]; ubiquitin protein ligase binding [GO:0031625]; protein neddylation [GO:0045116]	cytoplasm [GO:0005737]; ATP binding [GO:0005524]; NEDD8 transferase activity [GO:0019788]; ubiquitin protein ligase activity [GO:0061630]; ubiquitin protein ligase binding [GO:0031625]; protein neddylation [GO:0045116]	Accepts the ubiquitin-like protein NEDD8 from the UBA3-NAE1 E1 complex and catalyzes its covalent attachment to other proteins. The specific interaction with the E3 ubiquitin ligase RBX2, but not RBX1, suggests that the RBX2-UBE2F complex neddylates specific target proteins, such as CUL5. {ECO:0000269|PubMed:19250909}.	21077	21
ROA2_HUMAN	-0.093717	0.000381114	HNRNPA2B1	HNRNPA2B1 HNRPA2B1	Heterogeneous nuclear ribonucleoproteins A2/B1	-4.26216	-3.39817	0.00254084	0.0978309	0.112849	2.35568	20	0.0186794	0.00290087	0.0045635	353	Cajal body [GO:0015030]; catalytic step 2 spliceosome [GO:0071013]; chromosome, telomeric region [GO:0000781]; cytoplasm [GO:0005737]; extracellular exosome [GO:0070062]; intracellular ribonucleoprotein complex [GO:0030529]; membrane [GO:0016020]; nuclear matrix [GO:0016363]; nucleoplasm [GO:0005654]; nucleus [GO:0005634]; spliceosomal complex [GO:0005681]; G-rich strand telomeric DNA binding [GO…	Cajal body [GO:0015030]; catalytic step 2 spliceosome [GO:0071013]; chromosome, telomeric region [GO:0000781]; cytoplasm [GO:0005737]; extracellular exosome [GO:0070062]; intracellular ribonucleoprotein complex [GO:0030529]; membrane [GO:0016020]; nuclear matrix [GO:0016363]; nucleoplasm [GO:0005654]; nucleus [GO:0005634]; spliceosomal complex [GO:0005681]; G-rich strand telomeric DNA binding [GO…	Cajal body [GO:0015030]; catalytic step 2 spliceosome [GO:0071013]; chromosome, telomeric region [GO:0000781]; cytoplasm [GO:0005737]; extracellular exosome [GO:0070062]; intracellular ribonucleoprotein complex [GO:0030529]; membrane [GO:0016020]; nuclear matrix [GO:0016363]; nucleoplasm [GO:0005654]; nucleus [GO:0005634]; spliceosomal complex [GO:0005681]; G-rich strand telomeric DNA binding [GO…	Heterogeneous nuclear ribonucleoprotein (hnRNP) that associates with nascent pre-mRNAs, packaging them into hnRNP particles. The hnRNP particle arrangement on nascent hnRNA is non-random and sequence-dependent and serves to condense and stabilize the transcripts and minimize tangling and knotting. Packaging plays a role in various processes such as transcription, pre-mRNA processing, RNA nuclear …	37430	37
SRSF7_HUMAN	-0.0939453	0.0393399	SRSF7	SRSF7 SFRS7	Serine/arginine-rich splicing factor 7	-2.20482	-2.12621	0.0447614	0.253148	0.265169	2.35568	20	0.0186794	0.0108932	0.0117136	238	cytoplasm [GO:0005737]; extracellular exosome [GO:0070062]; nucleoplasm [GO:0005654]; nucleus [GO:0005634]; RNA binding [GO:0003723]; zinc ion binding [GO:0008270]; mRNA 3'-end processing [GO:0031124]; mRNA export from nucleus [GO:0006406]; mRNA processing [GO:0006397]; mRNA splicing, via spliceosome [GO:0000398]; negative regulation of mRNA splicing, via spliceosome [GO:0048025]; RNA export from…	cytoplasm [GO:0005737]; extracellular exosome [GO:0070062]; nucleoplasm [GO:0005654]; nucleus [GO:0005634]; RNA binding [GO:0003723]; zinc ion binding [GO:0008270]; mRNA 3'-end processing [GO:0031124]; mRNA export from nucleus [GO:0006406]; mRNA processing [GO:0006397]; mRNA splicing, via spliceosome [GO:0000398]; negative regulation of mRNA splicing, via spliceosome [GO:0048025]; RNA export from…	cytoplasm [GO:0005737]; extracellular exosome [GO:0070062]; nucleoplasm [GO:0005654]; nucleus [GO:0005634]; RNA binding [GO:0003723]; zinc ion binding [GO:0008270]; mRNA 3'-end processing [GO:0031124]; mRNA export from nucleus [GO:0006406]; mRNA processing [GO:0006397]; mRNA splicing, via spliceosome [GO:0000398]; negative regulation of mRNA splicing, via spliceosome [GO:0048025]; RNA export from…	Required for pre-mRNA splicing. Can also modulate alternative splicing in vitro. Represses the splicing of MAPT/Tau exon 10. May function as export adapter involved in mRNA nuclear export such as of histone H2A. Binds mRNA which is thought to be transferred to the NXF1-NXT1 heterodimer for export (TAP/NXF1 pathway); enhances NXF1-NXT1 RNA-binding activity. RNA-binding is semi-sequence specific. {…	27367	27
HACD3_HUMAN	-0.094136	0.0380001	HACD3	HACD3 BIND1 PTPLAD1	Very-long-chain	-2.22179	-2.14053	0.0434633	0.248876	0.26195	2.35568	20	0.0186794	0.010771	0.0116044	362	cytosol [GO:0005829]; endoplasmic reticulum [GO:0005783]; endoplasmic reticulum membrane [GO:0005789]; focal adhesion [GO:0005925]; integral component of membrane [GO:0016021]; mitochondrion [GO:0005739]; nuclear membrane [GO:0031965]; 3-hydroxy-arachidoyl-CoA dehydratase activity [GO:0102343]; 3-hydroxy-behenoyl-CoA dehydratase activity [GO:0102344]; 3-hydroxy-lignoceroyl-CoA dehydratase activit…	cytosol [GO:0005829]; endoplasmic reticulum [GO:0005783]; endoplasmic reticulum membrane [GO:0005789]; focal adhesion [GO:0005925]; integral component of membrane [GO:0016021]; mitochondrion [GO:0005739]; nuclear membrane [GO:0031965]; 3-hydroxy-arachidoyl-CoA dehydratase activity [GO:0102343]; 3-hydroxy-behenoyl-CoA dehydratase activity [GO:0102344]; 3-hydroxy-lignoceroyl-CoA dehydratase activit…	cytosol [GO:0005829]; endoplasmic reticulum [GO:0005783]; endoplasmic reticulum membrane [GO:0005789]; focal adhesion [GO:0005925]; integral component of membrane [GO:0016021]; mitochondrion [GO:0005739]; nuclear membrane [GO:0031965]; 3-hydroxy-arachidoyl-CoA dehydratase activity [GO:0102343]; 3-hydroxy-behenoyl-CoA dehydratase activity [GO:0102344]; 3-hydroxy-lignoceroyl-CoA dehydratase activit…	Catalyzes the third of the four reactions of the long-chain fatty acids elongation cycle. This endoplasmic reticulum-bound enzymatic process, allows the addition of two carbons to the chain of long- and very long-chain fatty acids/VLCFAs per cycle. This enzyme catalyzes the dehydration of the 3-hydroxyacyl-CoA intermediate into trans-2,3-enoyl-CoA, within each cycle of fatty acid elongation. Ther…	43160	43
STT3B_HUMAN	-0.0941846	0.0169522	STT3B	STT3B SIMP	Dolichyl-diphosphooligosaccharide--protein glycosyltransferase subunit STT3B	-2.60474	-2.43367	0.023379	0.17674	0.201342	2.35568	20	0.0186794	0.0078448	0.00898647	826	endoplasmic reticulum [GO:0005783]; integral component of membrane [GO:0016021]; membrane [GO:0016020]; oligosaccharyltransferase complex [GO:0008250]; dolichyl-diphosphooligosaccharide-protein glycotransferase activity [GO:0004579]; metal ion binding [GO:0046872]; co-translational protein modification [GO:0043686]; glycoprotein catabolic process [GO:0006516]; post-translational protein modificat…	endoplasmic reticulum [GO:0005783]; integral component of membrane [GO:0016021]; membrane [GO:0016020]; oligosaccharyltransferase complex [GO:0008250]; dolichyl-diphosphooligosaccharide-protein glycotransferase activity [GO:0004579]; metal ion binding [GO:0046872]; co-translational protein modification [GO:0043686]; glycoprotein catabolic process [GO:0006516]; post-translational protein modificat…	endoplasmic reticulum [GO:0005783]; integral component of membrane [GO:0016021]; membrane [GO:0016020]; oligosaccharyltransferase complex [GO:0008250]; dolichyl-diphosphooligosaccharide-protein glycotransferase activity [GO:0004579]; metal ion binding [GO:0046872]; co-translational protein modification [GO:0043686]; glycoprotein catabolic process [GO:0006516]; post-translational protein modificat…	Catalytic subunit of the N-oligosaccharyl transferase (OST) complex which catalyzes the transfer of a high mannose oligosaccharide from a lipid-linked oligosaccharide donor to an asparagine residue within an Asn-X-Ser/Thr consensus motif in nascent polypeptide chains. N-glycosylation occurs cotranslationally and the complex associates with the Sec61 complex at the channel-forming translocon compl…	93674	94
ROA1_HUMAN	-0.0948275	0.00357341	HNRNPA1	HNRNPA1 HNRPA1	Heterogeneous nuclear ribonucleoprotein A1	-3.30036	-2.90356	0.00815233	0.12239	0.134721	2.35568	20	0.0186794	0.00495332	0.00639968	372	catalytic step 2 spliceosome [GO:0071013]; cytoplasm [GO:0005737]; extracellular exosome [GO:0070062]; intracellular ribonucleoprotein complex [GO:0030529]; membrane [GO:0016020]; nucleoplasm [GO:0005654]; nucleus [GO:0005634]; spliceosomal complex [GO:0005681]; G-rich strand telomeric DNA binding [GO:0098505]; pre-mRNA binding [GO:0036002]; RNA binding [GO:0003723]; single-stranded DNA binding […	catalytic step 2 spliceosome [GO:0071013]; cytoplasm [GO:0005737]; extracellular exosome [GO:0070062]; intracellular ribonucleoprotein complex [GO:0030529]; membrane [GO:0016020]; nucleoplasm [GO:0005654]; nucleus [GO:0005634]; spliceosomal complex [GO:0005681]; G-rich strand telomeric DNA binding [GO:0098505]; pre-mRNA binding [GO:0036002]; RNA binding [GO:0003723]; single-stranded DNA binding […	catalytic step 2 spliceosome [GO:0071013]; cytoplasm [GO:0005737]; extracellular exosome [GO:0070062]; intracellular ribonucleoprotein complex [GO:0030529]; membrane [GO:0016020]; nucleoplasm [GO:0005654]; nucleus [GO:0005634]; spliceosomal complex [GO:0005681]; G-rich strand telomeric DNA binding [GO:0098505]; pre-mRNA binding [GO:0036002]; RNA binding [GO:0003723]; single-stranded DNA binding […	Involved in the packaging of pre-mRNA into hnRNP particles, transport of poly(A) mRNA from the nucleus to the cytoplasm and may modulate splice site selection. {ECO:0000269|PubMed:17371836}.; (Microbial infection) May play a role in HCV RNA replication. {ECO:0000269|PubMed:17229681}.	38747	39
PQBP1_HUMAN	-0.0950854	0.0441047	PQBP1	NA	NA	-2.14848	-2.08471	0.0487215	0.264703	0.274664	2.35568	20	0.0186794	0.0117521	0.0124821
SDCB1_HUMAN	-0.0951634	0.0330286	SDCBP	SDCBP MDA9 SYCL	Syntenin-1	-2.28994	-2.19884	0.0385221	0.234145	0.2476	2.35568	20	0.0186794	0.010362	0.0112384	298	adherens junction [GO:0005912]; azurophil granule lumen [GO:0035578]; blood microparticle [GO:0072562]; cytoplasm [GO:0005737]; cytoskeleton [GO:0005856]; cytosol [GO:0005829]; endoplasmic reticulum membrane [GO:0005789]; extracellular exosome [GO:0070062]; extracellular region [GO:0005576]; extracellular space [GO:0005615]; extracellular vesicle [GO:1903561]; focal adhesion [GO:0005925]; interle…	adherens junction [GO:0005912]; azurophil granule lumen [GO:0035578]; blood microparticle [GO:0072562]; cytoplasm [GO:0005737]; cytoskeleton [GO:0005856]; cytosol [GO:0005829]; endoplasmic reticulum membrane [GO:0005789]; extracellular exosome [GO:0070062]; extracellular region [GO:0005576]; extracellular space [GO:0005615]; extracellular vesicle [GO:1903561]; focal adhesion [GO:0005925]; interle…	adherens junction [GO:0005912]; azurophil granule lumen [GO:0035578]; blood microparticle [GO:0072562]; cytoplasm [GO:0005737]; cytoskeleton [GO:0005856]; cytosol [GO:0005829]; endoplasmic reticulum membrane [GO:0005789]; extracellular exosome [GO:0070062]; extracellular region [GO:0005576]; extracellular space [GO:0005615]; extracellular vesicle [GO:1903561]; focal adhesion [GO:0005925]; interle…	Multifunctional adapter protein involved in diverse array of functions including trafficking of transmembrane proteins, neuro and immunomodulation, exosome biogenesis, and tumorigenesis (PubMed:26291527). Positively regulates TGFB1-mediated SMAD2/3 activation and TGFB1-induced epithelial-to-mesenchymal transition (EMT) and cell migration in various cell types. May increase TGFB1 signaling by enha…	32444	32
NUP98_HUMAN	-0.0958883	0.0116397	NUP98	NUP98 ADAR2	Nuclear pore complex protein Nup98-Nup96	-2.77675	-2.56741	0.0174388	0.156697	0.177214	2.35568	20	0.0186794	0.00715498	0.00836934	1817	cytosol [GO:0005829]; intracellular membrane-bounded organelle [GO:0043231]; nuclear envelope [GO:0005635]; nuclear inclusion body [GO:0042405]; nuclear membrane [GO:0031965]; nuclear periphery [GO:0034399]; nuclear pore [GO:0005643]; nuclear pore cytoplasmic filaments [GO:0044614]; nuclear pore nuclear basket [GO:0044615]; nuclear pore outer ring [GO:0031080]; nucleoplasm [GO:0005654]; nuclear l…	cytosol [GO:0005829]; intracellular membrane-bounded organelle [GO:0043231]; nuclear envelope [GO:0005635]; nuclear inclusion body [GO:0042405]; nuclear membrane [GO:0031965]; nuclear periphery [GO:0034399]; nuclear pore [GO:0005643]; nuclear pore cytoplasmic filaments [GO:0044614]; nuclear pore nuclear basket [GO:0044615]; nuclear pore outer ring [GO:0031080]; nucleoplasm [GO:0005654]; nuclear l…	cytosol [GO:0005829]; intracellular membrane-bounded organelle [GO:0043231]; nuclear envelope [GO:0005635]; nuclear inclusion body [GO:0042405]; nuclear membrane [GO:0031965]; nuclear periphery [GO:0034399]; nuclear pore [GO:0005643]; nuclear pore cytoplasmic filaments [GO:0044614]; nuclear pore nuclear basket [GO:0044615]; nuclear pore outer ring [GO:0031080]; nucleoplasm [GO:0005654]; nuclear l…	Plays a role in the nuclear pore complex (NPC) assembly and/or maintenance. Nup98 and Nup96 are involved in the bidirectional transport across the NPC. May anchor NUP153 and TPR to the NPC. {ECO:0000269|PubMed:15229283}.	197579	198
PRP31_HUMAN	-0.0964307	0.0071851	PRPF31	PRPF31 PRP31	U4/U6 small nuclear ribonucleoprotein Prp31	-2.99319	-2.72031	0.0123879	0.138863	0.155949	2.35568	20	0.0186794	0.00622748	0.00753957	499	Cajal body [GO:0015030]; MLL1 complex [GO:0071339]; nuclear speck [GO:0016607]; nucleoplasm [GO:0005654]; nucleus [GO:0005634]; precatalytic spliceosome [GO:0071011]; U2-type spliceosomal complex [GO:0005684]; U4 snRNP [GO:0005687]; U4/U6 x U5 tri-snRNP complex [GO:0046540]; U4atac snRNP [GO:0005690]; ribonucleoprotein complex binding [GO:0043021]; RNA binding [GO:0003723]; snRNP binding [GO:0070…	Cajal body [GO:0015030]; MLL1 complex [GO:0071339]; nuclear speck [GO:0016607]; nucleoplasm [GO:0005654]; nucleus [GO:0005634]; precatalytic spliceosome [GO:0071011]; U2-type spliceosomal complex [GO:0005684]; U4 snRNP [GO:0005687]; U4/U6 x U5 tri-snRNP complex [GO:0046540]; U4atac snRNP [GO:0005690]; ribonucleoprotein complex binding [GO:0043021]; RNA binding [GO:0003723]; snRNP binding [GO:0070…	Cajal body [GO:0015030]; MLL1 complex [GO:0071339]; nuclear speck [GO:0016607]; nucleoplasm [GO:0005654]; nucleus [GO:0005634]; precatalytic spliceosome [GO:0071011]; U2-type spliceosomal complex [GO:0005684]; U4 snRNP [GO:0005687]; U4/U6 x U5 tri-snRNP complex [GO:0046540]; U4atac snRNP [GO:0005690]; ribonucleoprotein complex binding [GO:0043021]; RNA binding [GO:0003723]; snRNP binding [GO:0070…	Involved in pre-mRNA splicing. Required for the assembly of the U4/U5/U6 tri-snRNP complex, one of the building blocks of the spliceosome. {ECO:0000269|PubMed:11867543}.	55456	55
ANK3_HUMAN	-0.0972466	0.00137582	ANK3	ANK3	Ankyrin-3	-3.71273	-3.16877	0.00438803	0.112437	0.11615	2.35568	20	0.0186794	0.00411637	0.00565091	4377	axon initial segment [GO:0043194]; basolateral plasma membrane [GO:0016323]; cell surface [GO:0009986]; costamere [GO:0043034]; cytosol [GO:0005829]; dendrite [GO:0030425]; endoplasmic reticulum [GO:0005783]; Golgi apparatus [GO:0005794]; intercalated disc [GO:0014704]; lateral plasma membrane [GO:0016328]; lysosome [GO:0005764]; neuromuscular junction [GO:0031594]; neuron projection [GO:0043005]…	axon initial segment [GO:0043194]; basolateral plasma membrane [GO:0016323]; cell surface [GO:0009986]; costamere [GO:0043034]; cytosol [GO:0005829]; dendrite [GO:0030425]; endoplasmic reticulum [GO:0005783]; Golgi apparatus [GO:0005794]; intercalated disc [GO:0014704]; lateral plasma membrane [GO:0016328]; lysosome [GO:0005764]; neuromuscular junction [GO:0031594]; neuron projection [GO:0043005]…	axon initial segment [GO:0043194]; basolateral plasma membrane [GO:0016323]; cell surface [GO:0009986]; costamere [GO:0043034]; cytosol [GO:0005829]; dendrite [GO:0030425]; endoplasmic reticulum [GO:0005783]; Golgi apparatus [GO:0005794]; intercalated disc [GO:0014704]; lateral plasma membrane [GO:0016328]; lysosome [GO:0005764]; neuromuscular junction [GO:0031594]; neuron projection [GO:0043005]…	In skeletal muscle, required for costamere localization of DMD and betaDAG1 (By similarity). Membrane-cytoskeleton linker. May participate in the maintenance/targeting of ion channels and cell adhesion molecules at the nodes of Ranvier and axonal initial segments. Regulates KCNA1 channel activity in function of dietary Mg(2+) levels, and thereby contributes to the regulation of renal Mg(2+) reabs…	480410	480
SAE1_HUMAN	-0.0976103	0.00760732	SAE1	SAE1 AOS1 SUA1 UBLE1A	SUMO-activating enzyme subunit 1	-2.96779	-2.7116	0.0126339	0.138894	0.157147	2.35568	20	0.0186794	0.00649049	0.00777486	346	nucleoplasm [GO:0005654]; nucleus [GO:0005634]; SUMO activating enzyme complex [GO:0031510]; ATP-dependent protein binding [GO:0043008]; enzyme activator activity [GO:0008047]; protein C-terminus binding [GO:0008022]; protein heterodimerization activity [GO:0046982]; small protein activating enzyme binding [GO:0044388]; ubiquitin activating enzyme activity [GO:0004839]; positive regulation of pro…	nucleoplasm [GO:0005654]; nucleus [GO:0005634]; SUMO activating enzyme complex [GO:0031510]; ATP-dependent protein binding [GO:0043008]; enzyme activator activity [GO:0008047]; protein C-terminus binding [GO:0008022]; protein heterodimerization activity [GO:0046982]; small protein activating enzyme binding [GO:0044388]; ubiquitin activating enzyme activity [GO:0004839]; positive regulation of pro…	nucleoplasm [GO:0005654]; nucleus [GO:0005634]; SUMO activating enzyme complex [GO:0031510]; ATP-dependent protein binding [GO:0043008]; enzyme activator activity [GO:0008047]; protein C-terminus binding [GO:0008022]; protein heterodimerization activity [GO:0046982]; small protein activating enzyme binding [GO:0044388]; ubiquitin activating enzyme activity [GO:0004839]; positive regulation of pro…	The heterodimer acts as an E1 ligase for SUMO1, SUMO2, SUMO3, and probably SUMO4. It mediates ATP-dependent activation of SUMO proteins followed by formation of a thioester bond between a SUMO protein and a conserved active site cysteine residue on UBA2/SAE2. {ECO:0000269|PubMed:10187858, ECO:0000269|PubMed:10217437, ECO:0000269|PubMed:11451954, ECO:0000269|PubMed:11481243, ECO:0000269|PubMed:156…	38450	38
HMCN2_HUMAN	-0.09805	0.00804236	HMCN2	HMCN2	Hemicentin-2	-2.94299	-2.69764	0.0130377	0.14131	0.15898	2.35568	20	0.0186794	0.00665991	0.00792644	5059	basement membrane [GO:0005604]; cell cortex [GO:0005938]; cell junction [GO:0030054]; cleavage furrow [GO:0032154]; calcium ion binding [GO:0005509]; positive regulation of cell migration [GO:0030335]; response to stimulus [GO:0050896]; smooth muscle contraction [GO:0006939]	basement membrane [GO:0005604]; cell cortex [GO:0005938]; cell junction [GO:0030054]; cleavage furrow [GO:0032154]; calcium ion binding [GO:0005509]; positive regulation of cell migration [GO:0030335]; response to stimulus [GO:0050896]; smooth muscle contraction [GO:0006939]	basement membrane [GO:0005604]; cell cortex [GO:0005938]; cell junction [GO:0030054]; cleavage furrow [GO:0032154]; calcium ion binding [GO:0005509]; positive regulation of cell migration [GO:0030335]; response to stimulus [GO:0050896]; smooth muscle contraction [GO:0006939]		541978	542
BIN1_HUMAN	-0.0981544	0.049295	BIN1	BIN1 AMPHL	Myc box-dependent-interacting protein 1	-2.09308	-2.04869	0.052411	0.277193	0.282643	2.35568	20	0.0186794	0.0131947	0.0137727	593	actin cytoskeleton [GO:0015629]; axon [GO:0030424]; axon initial segment [GO:0043194]; cytoplasm [GO:0005737]; cytosol [GO:0005829]; I band [GO:0031674]; lipid tube [GO:0060987]; membrane [GO:0016020]; node of Ranvier [GO:0033268]; nuclear envelope [GO:0005635]; T-tubule [GO:0030315]; Z disc [GO:0030018]; actin filament binding [GO:0051015]; identical protein binding [GO:0042802]; RNA polymerase …	actin cytoskeleton [GO:0015629]; axon [GO:0030424]; axon initial segment [GO:0043194]; cytoplasm [GO:0005737]; cytosol [GO:0005829]; I band [GO:0031674]; lipid tube [GO:0060987]; membrane [GO:0016020]; node of Ranvier [GO:0033268]; nuclear envelope [GO:0005635]; T-tubule [GO:0030315]; Z disc [GO:0030018]; actin filament binding [GO:0051015]; identical protein binding [GO:0042802]; RNA polymerase …	actin cytoskeleton [GO:0015629]; axon [GO:0030424]; axon initial segment [GO:0043194]; cytoplasm [GO:0005737]; cytosol [GO:0005829]; I band [GO:0031674]; lipid tube [GO:0060987]; membrane [GO:0016020]; node of Ranvier [GO:0033268]; nuclear envelope [GO:0005635]; T-tubule [GO:0030315]; Z disc [GO:0030018]; actin filament binding [GO:0051015]; identical protein binding [GO:0042802]; RNA polymerase …	May be involved in regulation of synaptic vesicle endocytosis. May act as a tumor suppressor and inhibits malignant cell transformation.	64699	65
EWS_HUMAN	-0.0986911	0.0309643	EWSR1	EWSR1 EWS	RNA-binding protein EWS	-2.32105	-2.2375	0.0355325	0.227973	0.238649	2.35568	20	0.0186794	0.0108477	0.011673	656	cytoplasm [GO:0005737]; nucleolus [GO:0005730]; nucleus [GO:0005634]; plasma membrane [GO:0005886]; calmodulin binding [GO:0005516]; identical protein binding [GO:0042802]; RNA binding [GO:0003723]; zinc ion binding [GO:0008270]; regulation of transcription, DNA-templated [GO:0006355]; transcription, DNA-templated [GO:0006351]	cytoplasm [GO:0005737]; nucleolus [GO:0005730]; nucleus [GO:0005634]; plasma membrane [GO:0005886]; calmodulin binding [GO:0005516]; identical protein binding [GO:0042802]; RNA binding [GO:0003723]; zinc ion binding [GO:0008270]; regulation of transcription, DNA-templated [GO:0006355]; transcription, DNA-templated [GO:0006351]	cytoplasm [GO:0005737]; nucleolus [GO:0005730]; nucleus [GO:0005634]; plasma membrane [GO:0005886]; calmodulin binding [GO:0005516]; identical protein binding [GO:0042802]; RNA binding [GO:0003723]; zinc ion binding [GO:0008270]; regulation of transcription, DNA-templated [GO:0006355]; transcription, DNA-templated [GO:0006351]	Might normally function as a transcriptional repressor. EWS-fusion-proteins (EFPS) may play a role in the tumorigenic process. They may disturb gene expression by mimicking, or interfering with the normal function of CTD-POLII within the transcription initiation complex. They may also contribute to an aberrant activation of the fusion protein target genes.	68478	68
CBX3_HUMAN	-0.0987925	0.0100316	CBX3	CBX3	Chromobox protein homolog 3	-2.84392	-2.63317	0.0150663	0.147715	0.166941	2.35568	20	0.0186794	0.00724043	0.00844579	183	chromatin [GO:0000785]; chromosome, centromeric region [GO:0000775]; condensed chromosome, centromeric region [GO:0000779]; nuclear chromosome, telomeric region [GO:0000784]; nuclear envelope [GO:0005635]; nuclear euchromatin [GO:0005719]; nuclear heterochromatin [GO:0005720]; nuclear inner membrane [GO:0005637]; nuclear pericentric heterochromatin [GO:0031618]; nucleus [GO:0005634]; senescence-a…	chromatin [GO:0000785]; chromosome, centromeric region [GO:0000775]; condensed chromosome, centromeric region [GO:0000779]; nuclear chromosome, telomeric region [GO:0000784]; nuclear envelope [GO:0005635]; nuclear euchromatin [GO:0005719]; nuclear heterochromatin [GO:0005720]; nuclear inner membrane [GO:0005637]; nuclear pericentric heterochromatin [GO:0031618]; nucleus [GO:0005634]; senescence-a…	chromatin [GO:0000785]; chromosome, centromeric region [GO:0000775]; condensed chromosome, centromeric region [GO:0000779]; nuclear chromosome, telomeric region [GO:0000784]; nuclear envelope [GO:0005635]; nuclear euchromatin [GO:0005719]; nuclear heterochromatin [GO:0005720]; nuclear inner membrane [GO:0005637]; nuclear pericentric heterochromatin [GO:0031618]; nucleus [GO:0005634]; senescence-a…	Seems to be involved in transcriptional silencing in heterochromatin-like complexes. Recognizes and binds histone H3 tails methylated at 'Lys-9', leading to epigenetic repression. May contribute to the association of the heterochromatin with the inner nuclear membrane through its interaction with lamin B receptor (LBR). Involved in the formation of functional kinetochore through interaction with …	20811	21
CCAR1_HUMAN	-0.0990419	0.0185018	CCAR1	CCAR1 CARP1 DIS	Cell division cycle and apoptosis regulator protein 1	-2.56422	-2.42891	0.0236214	0.183082	0.201963	2.35568	20	0.0186794	0.00895114	0.00997623	1150	nucleoplasm [GO:0005654]; perinuclear region of cytoplasm [GO:0048471]; core promoter binding [GO:0001047]; ligand-dependent nuclear receptor transcription coactivator activity [GO:0030374]; RNA binding [GO:0003723]; transcription coactivator activity [GO:0003713]; transcription corepressor activity [GO:0003714]; apoptotic process [GO:0006915]; cell cycle [GO:0007049]; mRNA splicing, via spliceos…	nucleoplasm [GO:0005654]; perinuclear region of cytoplasm [GO:0048471]; core promoter binding [GO:0001047]; ligand-dependent nuclear receptor transcription coactivator activity [GO:0030374]; RNA binding [GO:0003723]; transcription coactivator activity [GO:0003713]; transcription corepressor activity [GO:0003714]; apoptotic process [GO:0006915]; cell cycle [GO:0007049]; mRNA splicing, via spliceos…	nucleoplasm [GO:0005654]; perinuclear region of cytoplasm [GO:0048471]; core promoter binding [GO:0001047]; ligand-dependent nuclear receptor transcription coactivator activity [GO:0030374]; RNA binding [GO:0003723]; transcription coactivator activity [GO:0003713]; transcription corepressor activity [GO:0003714]; apoptotic process [GO:0006915]; cell cycle [GO:0007049]; mRNA splicing, via spliceos…	Associates with components of the Mediator and p160 coactivator complexes that play a role as intermediaries transducing regulatory signals from upstream transcriptional activator proteins to basal transcription machinery at the core promoter. Recruited to endogenous nuclear receptor target genes in response to the appropriate hormone. Also functions as a p53 coactivator. May thus play an importa…	132821	133
VPS51_HUMAN	-0.0990527	0.0423826	VPS51	VPS51 ANG2 C11orf2 C11orf3 FFR PP5382	Vacuolar protein sorting-associated protein 51 homolog	-2.16817	-2.1141	0.0458854	0.261043	0.267688	2.35568	20	0.0186794	0.0125226	0.0131714	782	cytosol [GO:0005829]; EARP complex [GO:1990745]; GARP complex [GO:0000938]; Golgi apparatus [GO:0005794]; integral component of membrane [GO:0016021]; intracellular membrane-bounded organelle [GO:0043231]; membrane [GO:0016020]; nucleolus [GO:0005730]; recycling endosome [GO:0055037]; trans-Golgi network [GO:0005802]; trans-Golgi network membrane [GO:0032588]; autophagy [GO:0006914]; endocytic re…	cytosol [GO:0005829]; EARP complex [GO:1990745]; GARP complex [GO:0000938]; Golgi apparatus [GO:0005794]; integral component of membrane [GO:0016021]; intracellular membrane-bounded organelle [GO:0043231]; membrane [GO:0016020]; nucleolus [GO:0005730]; recycling endosome [GO:0055037]; trans-Golgi network [GO:0005802]; trans-Golgi network membrane [GO:0032588]; autophagy [GO:0006914]; endocytic re…	cytosol [GO:0005829]; EARP complex [GO:1990745]; GARP complex [GO:0000938]; Golgi apparatus [GO:0005794]; integral component of membrane [GO:0016021]; intracellular membrane-bounded organelle [GO:0043231]; membrane [GO:0016020]; nucleolus [GO:0005730]; recycling endosome [GO:0055037]; trans-Golgi network [GO:0005802]; trans-Golgi network membrane [GO:0032588]; autophagy [GO:0006914]; endocytic re…	Acts as component of the GARP complex that is involved in retrograde transport from early and late endosomes to the trans-Golgi network (TGN). The GARP complex is required for the maintenance of protein retrieval from endosomes to the TGN, acid hydrolase sorting, lysosome function, endosomal cholesterol traffic and autophagy. VPS51 participates in retrograde transport of acid hydrolase receptors,…	86042	86
RBM4_HUMAN	-0.0991068	0.0478296	RBM4	RBM4 RBM4A	RNA-binding protein 4	-2.10816	-2.06419	0.0507944	0.273534	0.278971	2.35568	20	0.0186794	0.0132602	0.0138312	364	cytoplasm [GO:0005737]; cytoplasmic stress granule [GO:0010494]; cytosol [GO:0005829]; nuclear speck [GO:0016607]; nucleolus [GO:0005730]; nucleoplasm [GO:0005654]; nucleus [GO:0005634]	cyclin binding [GO:0030332]; miRNA binding [GO:0035198]; mRNA 3'-UTR binding [GO:0003730]; mRNA binding [GO:0003729]; pre-mRNA intronic binding [GO:0097157]; pre-mRNA intronic pyrimidine-rich binding [GO:0097158]; RNA binding [GO:0003723]; zinc ion binding [GO:0008270]	cap-independent translational initiation [GO:0002190]; cell differentiation [GO:0030154]; circadian regulation of translation [GO:0097167]; entrainment of circadian clock by photoperiod [GO:0043153]; IRES-dependent translational initiation of linear mRNA [GO:0002192]; miRNA mediated inhibition of translation [GO:0035278]; mRNA processing [GO:0006397]; negative regulation of translation [GO:001714…	RNA-binding factor involved in multiple aspects of cellular processes like alternative splicing of pre-mRNA and translation regulation. Modulates alternative 5'-splice site and exon selection. Acts as a muscle cell differentiation-promoting factor. Activates exon skipping of the PTB pre-mRNA during muscle cell differentiation. Antagonizes the activity of the splicing factor PTBP1 to modulate musc…	40314	40
PTBP2_HUMAN	-0.0992437	0.00871467	PTBP2	PTBP2 NPTB PTB PTBLP	Polypyrimidine tract-binding protein 2	-2.9071	-2.68063	0.0135466	0.142242	0.160377	2.35568	20	0.0186794	0.00699256	0.00822403	531	growth cone [GO:0030426]; neuronal cell body [GO:0043025]; spliceosomal complex [GO:0005681]; mRNA binding [GO:0003729]; pre-mRNA binding [GO:0036002]; RNA binding [GO:0003723]; cerebellum development [GO:0021549]; mRNA splice site selection [GO:0006376]; negative regulation of RNA splicing [GO:0033119]; regulation of neural precursor cell proliferation [GO:2000177]; spinal cord development [GO:0…	growth cone [GO:0030426]; neuronal cell body [GO:0043025]; spliceosomal complex [GO:0005681]; mRNA binding [GO:0003729]; pre-mRNA binding [GO:0036002]; RNA binding [GO:0003723]; cerebellum development [GO:0021549]; mRNA splice site selection [GO:0006376]; negative regulation of RNA splicing [GO:0033119]; regulation of neural precursor cell proliferation [GO:2000177]; spinal cord development [GO:0…	growth cone [GO:0030426]; neuronal cell body [GO:0043025]; spliceosomal complex [GO:0005681]; mRNA binding [GO:0003729]; pre-mRNA binding [GO:0036002]; RNA binding [GO:0003723]; cerebellum development [GO:0021549]; mRNA splice site selection [GO:0006376]; negative regulation of RNA splicing [GO:0033119]; regulation of neural precursor cell proliferation [GO:2000177]; spinal cord development [GO:0…	RNA-binding protein which binds to intronic polypyrimidine tracts and mediates negative regulation of exons splicing. May antagonize in a tissue-specific manner the ability of NOVA1 to activate exon selection. In addition to its function in pre-mRNA splicing, plays also a role in the regulation of translation. Isoform 5 has a reduced affinity for RNA. {ECO:0000269|PubMed:11003644, ECO:0000269|Pub…	57491	57
TTC1_HUMAN	-0.101566	0.0214508	TTC1	TTC1 TPR1	Tetratricopeptide repeat protein 1	-2.49523	-2.38712	0.025853	0.192641	0.208864	2.35568	20	0.0186794	0.00994099	0.0108618	292	cytosol [GO:0005829]; peroxisomal membrane [GO:0005778]; unfolded protein binding [GO:0051082]; protein folding [GO:0006457]	cytosol [GO:0005829]; peroxisomal membrane [GO:0005778]; unfolded protein binding [GO:0051082]; protein folding [GO:0006457]	cytosol [GO:0005829]; peroxisomal membrane [GO:0005778]; unfolded protein binding [GO:0051082]; protein folding [GO:0006457]		33526	34
TBC17_HUMAN	-0.102227	0.00410526	TBC1D17	TBC1D17	TBC1 domain family member 17	-3.23981	-2.92825	0.00770057	0.123495	0.132983	2.35568	20	0.0186794	0.00597375	0.00731258	648	autophagosome [GO:0005776]; cytosol [GO:0005829]; endomembrane system [GO:0012505]; recycling endosome [GO:0055037]; GTPase activator activity [GO:0005096]; Rab GTPase binding [GO:0017137]; activation of GTPase activity [GO:0090630]; autophagy [GO:0006914]; intracellular protein transport [GO:0006886]; membrane organization [GO:0061024]; regulation of vesicle fusion [GO:0031338]; retrograde trans…	autophagosome [GO:0005776]; cytosol [GO:0005829]; endomembrane system [GO:0012505]; recycling endosome [GO:0055037]; GTPase activator activity [GO:0005096]; Rab GTPase binding [GO:0017137]; activation of GTPase activity [GO:0090630]; autophagy [GO:0006914]; intracellular protein transport [GO:0006886]; membrane organization [GO:0061024]; regulation of vesicle fusion [GO:0031338]; retrograde trans…	autophagosome [GO:0005776]; cytosol [GO:0005829]; endomembrane system [GO:0012505]; recycling endosome [GO:0055037]; GTPase activator activity [GO:0005096]; Rab GTPase binding [GO:0017137]; activation of GTPase activity [GO:0090630]; autophagy [GO:0006914]; intracellular protein transport [GO:0006886]; membrane organization [GO:0061024]; regulation of vesicle fusion [GO:0031338]; retrograde trans…	Probable GTPase-activating protein for Rab8; its transient association with Rab8 is mediated by OPTN. Inhibits Rab8-mediated endocytic trafficking, such as of transferrin receptor (TfR) and reduces Rab8 recruitnment to tubules emanating from the endocytic recycling compartment (ERC). Involved in regulation of autophagy. Mediates inhibition of autophagy caused by the OPTN variant GLC1E LYS-50; the…	72728	73
CUL4B_HUMAN	-0.102254	0.0382027	CUL4B	CUL4B KIAA0695	Cullin-4B	-2.3064	-2.09581	0.0530607	0.249431	0.283201	2.35568	13	0.0186794	0.00786242	0.00952182	913	Cul4B-RING E3 ubiquitin ligase complex [GO:0031465]; cytosol [GO:0005829]; extracellular exosome [GO:0070062]; nucleoplasm [GO:0005654]; ubiquitin protein ligase binding [GO:0031625]; cell cycle [GO:0007049]; DNA damage response, detection of DNA damage [GO:0042769]; global genome nucleotide-excision repair [GO:0070911]; histone H2A monoubiquitination [GO:0035518]; neuron projection development […	Cul4B-RING E3 ubiquitin ligase complex [GO:0031465]; cytosol [GO:0005829]; extracellular exosome [GO:0070062]; nucleoplasm [GO:0005654]; ubiquitin protein ligase binding [GO:0031625]; cell cycle [GO:0007049]; DNA damage response, detection of DNA damage [GO:0042769]; global genome nucleotide-excision repair [GO:0070911]; histone H2A monoubiquitination [GO:0035518]; neuron projection development […	Cul4B-RING E3 ubiquitin ligase complex [GO:0031465]; cytosol [GO:0005829]; extracellular exosome [GO:0070062]; nucleoplasm [GO:0005654]; ubiquitin protein ligase binding [GO:0031625]; cell cycle [GO:0007049]; DNA damage response, detection of DNA damage [GO:0042769]; global genome nucleotide-excision repair [GO:0070911]; histone H2A monoubiquitination [GO:0035518]; neuron projection development […	Core component of multiple cullin-RING-based E3 ubiquitin-protein ligase complexes which mediate the ubiquitination and subsequent proteasomal degradation of target proteins. The functional specificity of the E3 ubiquitin-protein ligase complex depends on the variable substrate recognition subunit. CUL4B may act within the complex as a scaffold protein, contributing to catalysis through positioni…	103982	104
JPH1_HUMAN	-0.102258	0.00204549	JPH1	JPH1 JP1	Junctophilin-1	-3.54211	-3.12078	0.00491376	0.112743	0.121803	2.35568	20	0.0186794	0.00500056	0.00644194	661	integral component of membrane [GO:0016021]; junctional membrane complex [GO:0030314]; junctional sarcoplasmic reticulum membrane [GO:0014701]; plasma membrane [GO:0005886]; sarcoplasmic reticulum [GO:0016529]; Z disc [GO:0030018]; structural constituent of muscle [GO:0008307]; calcium ion transport into cytosol [GO:0060402]; muscle organ development [GO:0007517]; regulation of ryanodine-sensitiv…	integral component of membrane [GO:0016021]; junctional membrane complex [GO:0030314]; junctional sarcoplasmic reticulum membrane [GO:0014701]; plasma membrane [GO:0005886]; sarcoplasmic reticulum [GO:0016529]; Z disc [GO:0030018]; structural constituent of muscle [GO:0008307]; calcium ion transport into cytosol [GO:0060402]; muscle organ development [GO:0007517]; regulation of ryanodine-sensitiv…	integral component of membrane [GO:0016021]; junctional membrane complex [GO:0030314]; junctional sarcoplasmic reticulum membrane [GO:0014701]; plasma membrane [GO:0005886]; sarcoplasmic reticulum [GO:0016529]; Z disc [GO:0030018]; structural constituent of muscle [GO:0008307]; calcium ion transport into cytosol [GO:0060402]; muscle organ development [GO:0007517]; regulation of ryanodine-sensitiv…	Junctophilins contribute to the formation of junctional membrane complexes (JMCs) which link the plasma membrane with the endoplasmic or sarcoplasmic reticulum in excitable cells. Provides a structural foundation for functional cross-talk between the cell surface and intracellular calcium release channels. JPH1 contributes to the construction of the skeletal muscle triad by linking the t-tubule (…	71686	72
CASQ1_HUMAN	-0.102267	0.00966745	CASQ1	CASQ1 CASQ	Calsequestrin-1	-2.86056	-2.66598	0.0139995	0.144964	0.162496	2.35568	20	0.0186794	0.00766864	0.00882887	396	endoplasmic reticulum [GO:0005783]; Golgi apparatus [GO:0005794]; I band [GO:0031674]; mitochondrial matrix [GO:0005759]; mitochondrion [GO:0005739]; sarcoplasmic reticulum [GO:0016529]; sarcoplasmic reticulum lumen [GO:0033018]; sarcoplasmic reticulum membrane [GO:0033017]; smooth endoplasmic reticulum [GO:0005790]; T-tubule [GO:0030315]; terminal cisterna lumen [GO:0014804]; calcium ion binding…	endoplasmic reticulum [GO:0005783]; Golgi apparatus [GO:0005794]; I band [GO:0031674]; mitochondrial matrix [GO:0005759]; mitochondrion [GO:0005739]; sarcoplasmic reticulum [GO:0016529]; sarcoplasmic reticulum lumen [GO:0033018]; sarcoplasmic reticulum membrane [GO:0033017]; smooth endoplasmic reticulum [GO:0005790]; T-tubule [GO:0030315]; terminal cisterna lumen [GO:0014804]; calcium ion binding…	endoplasmic reticulum [GO:0005783]; Golgi apparatus [GO:0005794]; I band [GO:0031674]; mitochondrial matrix [GO:0005759]; mitochondrion [GO:0005739]; sarcoplasmic reticulum [GO:0016529]; sarcoplasmic reticulum lumen [GO:0033018]; sarcoplasmic reticulum membrane [GO:0033017]; smooth endoplasmic reticulum [GO:0005790]; T-tubule [GO:0030315]; terminal cisterna lumen [GO:0014804]; calcium ion binding…	Calsequestrin is a high-capacity, moderate affinity, calcium-binding protein and thus acts as an internal calcium store in muscle. Calcium ions are bound by clusters of acidic residues at the protein surface, often at the interface between subunits. Can bind around 80 Ca(2+) ions. Regulates the release of lumenal Ca(2+) via the calcium release channel RYR1; this plays an important role in trigger…	45160	45
MAP1S_HUMAN	-0.102339	0.0471119	MAP1S	MAP1S BPY2IP1 C19orf5 MAP8 VCY2IP1	Microtubule-associated protein 1S	-2.1157	-2.07979	0.0492114	0.27254	0.274664	2.35568	20	0.0186794	0.0140386	0.0145276	1059	cell junction [GO:0030054]; cell projection [GO:0042995]; cytosol [GO:0005829]; dendrite [GO:0030425]; microtubule [GO:0005874]; neuronal cell body [GO:0043025]; nucleolus [GO:0005730]; nucleus [GO:0005634]; perinuclear region of cytoplasm [GO:0048471]; spindle [GO:0005819]; synapse [GO:0045202]; actin filament binding [GO:0051015]; beta-tubulin binding [GO:0048487]; DNA binding [GO:0003677]; ide…	cell junction [GO:0030054]; cell projection [GO:0042995]; cytosol [GO:0005829]; dendrite [GO:0030425]; microtubule [GO:0005874]; neuronal cell body [GO:0043025]; nucleolus [GO:0005730]; nucleus [GO:0005634]; perinuclear region of cytoplasm [GO:0048471]; spindle [GO:0005819]; synapse [GO:0045202]; actin filament binding [GO:0051015]; beta-tubulin binding [GO:0048487]; DNA binding [GO:0003677]; ide…	cell junction [GO:0030054]; cell projection [GO:0042995]; cytosol [GO:0005829]; dendrite [GO:0030425]; microtubule [GO:0005874]; neuronal cell body [GO:0043025]; nucleolus [GO:0005730]; nucleus [GO:0005634]; perinuclear region of cytoplasm [GO:0048471]; spindle [GO:0005819]; synapse [GO:0045202]; actin filament binding [GO:0051015]; beta-tubulin binding [GO:0048487]; DNA binding [GO:0003677]; ide…	Microtubule-associated protein that mediates aggregation of mitochondria resulting in cell death and genomic destruction (MAGD). Plays a role in anchoring the microtubule organizing center to the centrosomes. Binds to DNA. Plays a role in apoptosis. Involved in the formation of microtubule bundles (By similarity). {ECO:0000250, ECO:0000269|PubMed:15899810, ECO:0000269|PubMed:17234756}.	112211	112
NDRG2_HUMAN	-0.104047	0.00851296	NDRG2	NDRG2 KIAA1248 SYLD	Protein NDRG2	-2.91758	-2.71762	0.0124632	0.141794	0.156079	2.35568	20	0.0186794	0.00763071	0.00879494	371	cytosol [GO:0005829]; extracellular exosome [GO:0070062]; Golgi apparatus [GO:0005794]; growth cone [GO:0030426]; nucleus [GO:0005634]; perinuclear region of cytoplasm [GO:0048471]; cell differentiation [GO:0030154]; negative regulation of cytokine production [GO:0001818]; negative regulation of ERK1 and ERK2 cascade [GO:0070373]; negative regulation of smooth muscle cell proliferation [GO:004866…	cytosol [GO:0005829]; extracellular exosome [GO:0070062]; Golgi apparatus [GO:0005794]; growth cone [GO:0030426]; nucleus [GO:0005634]; perinuclear region of cytoplasm [GO:0048471]; cell differentiation [GO:0030154]; negative regulation of cytokine production [GO:0001818]; negative regulation of ERK1 and ERK2 cascade [GO:0070373]; negative regulation of smooth muscle cell proliferation [GO:004866…	cytosol [GO:0005829]; extracellular exosome [GO:0070062]; Golgi apparatus [GO:0005794]; growth cone [GO:0030426]; nucleus [GO:0005634]; perinuclear region of cytoplasm [GO:0048471]; cell differentiation [GO:0030154]; negative regulation of cytokine production [GO:0001818]; negative regulation of ERK1 and ERK2 cascade [GO:0070373]; negative regulation of smooth muscle cell proliferation [GO:004866…	Contributes to the regulation of the Wnt signaling pathway. Down-regulates CTNNB1-mediated transcriptional activation of target genes, such as CCND1, and may thereby act as tumor suppressor. May be involved in dendritic cell and neuron differentiation. {ECO:0000269|PubMed:12845671, ECO:0000269|PubMed:16103061, ECO:0000269|PubMed:21247902}.	40798	41
STAT3_HUMAN	-0.104398	0.0311896	STAT3	STAT3 APRF	Signal transducer and activator of transcription 3	-2.31756	-2.25496	0.0342528	0.22869	0.233654	2.35568	20	0.0186794	0.0121752	0.0128606	770	cytoplasm [GO:0005737]; cytosol [GO:0005829]; mitochondrial inner membrane [GO:0005743]; nuclear chromatin [GO:0000790]; nucleoplasm [GO:0005654]; nucleus [GO:0005634]; plasma membrane [GO:0005886]; RNA polymerase II transcription factor complex [GO:0090575]; CCR5 chemokine receptor binding [GO:0031730]; chromatin DNA binding [GO:0031490]; DNA binding [GO:0003677]; glucocorticoid receptor binding…	cytoplasm [GO:0005737]; cytosol [GO:0005829]; mitochondrial inner membrane [GO:0005743]; nuclear chromatin [GO:0000790]; nucleoplasm [GO:0005654]; nucleus [GO:0005634]; plasma membrane [GO:0005886]; RNA polymerase II transcription factor complex [GO:0090575]; CCR5 chemokine receptor binding [GO:0031730]; chromatin DNA binding [GO:0031490]; DNA binding [GO:0003677]; glucocorticoid receptor binding…	cytoplasm [GO:0005737]; cytosol [GO:0005829]; mitochondrial inner membrane [GO:0005743]; nuclear chromatin [GO:0000790]; nucleoplasm [GO:0005654]; nucleus [GO:0005634]; plasma membrane [GO:0005886]; RNA polymerase II transcription factor complex [GO:0090575]; CCR5 chemokine receptor binding [GO:0031730]; chromatin DNA binding [GO:0031490]; DNA binding [GO:0003677]; glucocorticoid receptor binding…	Signal transducer and transcription activator that mediates cellular responses to interleukins, KITLG/SCF, LEP and other growth factors (PubMed:10688651, PubMed:12359225, PubMed:12873986, PubMed:15194700, PubMed:17344214, PubMed:18242580, PubMed:23084476). Once activated, recruits coactivators, such as NCOA1 or MED1, to the promoter region of the target gene (PubMed:17344214). May mediate cellula…	88068	88
AKP13_HUMAN	-0.104612	0.0406074	AKAP13	NA	NA	-2.27346	-2.08853	0.0537959	0.256561	0.285535	2.35568	13	0.0186794	0.00846934	0.0100356
VPP1_HUMAN	-0.104662	0.0185062	ATP6V0A1	ATP6V0A1 ATP6N1 ATP6N1A VPP1	V-type proton ATPase 116 kDa subunit a isoform 1	-2.56411	-2.45426	0.0223559	0.183082	0.195963	2.35568	20	0.0186794	0.0099967	0.0109116	837	cytosol [GO:0005829]; endosome membrane [GO:0010008]; extracellular exosome [GO:0070062]; ficolin-1-rich granule membrane [GO:0101003]; Golgi apparatus [GO:0005794]; integral component of membrane [GO:0016021]; intracellular membrane-bounded organelle [GO:0043231]; lysosomal membrane [GO:0005765]; melanosome [GO:0042470]; nuclear speck [GO:0016607]; phagocytic vesicle membrane [GO:0030670]; plasm…	cytosol [GO:0005829]; endosome membrane [GO:0010008]; extracellular exosome [GO:0070062]; ficolin-1-rich granule membrane [GO:0101003]; Golgi apparatus [GO:0005794]; integral component of membrane [GO:0016021]; intracellular membrane-bounded organelle [GO:0043231]; lysosomal membrane [GO:0005765]; melanosome [GO:0042470]; nuclear speck [GO:0016607]; phagocytic vesicle membrane [GO:0030670]; plasm…	cytosol [GO:0005829]; endosome membrane [GO:0010008]; extracellular exosome [GO:0070062]; ficolin-1-rich granule membrane [GO:0101003]; Golgi apparatus [GO:0005794]; integral component of membrane [GO:0016021]; intracellular membrane-bounded organelle [GO:0043231]; lysosomal membrane [GO:0005765]; melanosome [GO:0042470]; nuclear speck [GO:0016607]; phagocytic vesicle membrane [GO:0030670]; plasm…	Required for assembly and activity of the vacuolar ATPase. Potential role in differential targeting and regulation of the enzyme for a specific organelle (By similarity). {ECO:0000250}.	96413	96
LYPA2_HUMAN	-0.104866	0.0158692	LYPLA2	LYPLA2 APT2	Acyl-protein thioesterase 2	-2.63519	-2.51052	0.0197689	0.174181	0.186749	2.35568	20	0.0186794	0.00950155	0.0104686	231	cytoplasm [GO:0005737]; cytosol [GO:0005829]; extracellular exosome [GO:0070062]; cadherin binding [GO:0045296]; carboxylic ester hydrolase activity [GO:0052689]; palmitoyl-(protein) hydrolase activity [GO:0008474]; axon guidance [GO:0007411]; fatty acid metabolic process [GO:0006631]; protein depalmitoylation [GO:0002084]	cytoplasm [GO:0005737]; cytosol [GO:0005829]; extracellular exosome [GO:0070062]; cadherin binding [GO:0045296]; carboxylic ester hydrolase activity [GO:0052689]; palmitoyl-(protein) hydrolase activity [GO:0008474]; axon guidance [GO:0007411]; fatty acid metabolic process [GO:0006631]; protein depalmitoylation [GO:0002084]	cytoplasm [GO:0005737]; cytosol [GO:0005829]; extracellular exosome [GO:0070062]; cadherin binding [GO:0045296]; carboxylic ester hydrolase activity [GO:0052689]; palmitoyl-(protein) hydrolase activity [GO:0008474]; axon guidance [GO:0007411]; fatty acid metabolic process [GO:0006631]; protein depalmitoylation [GO:0002084]	May hydrolyze fatty acids from S-acylated cysteine residues in proteins such as trimeric G alpha proteins or HRAS. Has lysophospholipase activity (By similarity). Deacylates GAP43. {ECO:0000250, ECO:0000269|PubMed:21152083}.	24737	25
CO4A1_HUMAN	-0.105164	0.038083	COL4A1	COL4A1	Collagen alpha-1	-2.22072	-2.17665	0.0403391	0.248981	0.253578	2.35568	20	0.0186794	0.0134555	0.014006	1669	basement membrane [GO:0005604]; collagen type IV trimer [GO:0005587]; endoplasmic reticulum lumen [GO:0005788]; extracellular matrix [GO:0031012]; extracellular region [GO:0005576]; extracellular space [GO:0005615]; extracellular matrix constituent conferring elasticity [GO:0030023]; extracellular matrix structural constituent [GO:0005201]; platelet-derived growth factor binding [GO:0048407]; bas…	basement membrane [GO:0005604]; collagen type IV trimer [GO:0005587]; endoplasmic reticulum lumen [GO:0005788]; extracellular matrix [GO:0031012]; extracellular region [GO:0005576]; extracellular space [GO:0005615]; extracellular matrix constituent conferring elasticity [GO:0030023]; extracellular matrix structural constituent [GO:0005201]; platelet-derived growth factor binding [GO:0048407]; bas…	basement membrane [GO:0005604]; collagen type IV trimer [GO:0005587]; endoplasmic reticulum lumen [GO:0005788]; extracellular matrix [GO:0031012]; extracellular region [GO:0005576]; extracellular space [GO:0005615]; extracellular matrix constituent conferring elasticity [GO:0030023]; extracellular matrix structural constituent [GO:0005201]; platelet-derived growth factor binding [GO:0048407]; bas…	Type IV collagen is the major structural component of glomerular basement membranes (GBM), forming a 'chicken-wire' meshwork together with laminins, proteoglycans and entactin/nidogen.; Arresten, comprising the C-terminal NC1 domain, inhibits angiogenesis and tumor formation. The C-terminal half is found to possess the anti-angiogenic activity. Specifically inhibits endothelial cell proliferation…	160615	161
NUCL_HUMAN	-0.10537	0.0451054	NCL	NCL	Nucleolin	-2.13735	-2.1064	0.0466137	0.267066	0.271153	2.35568	20	0.0186794	0.0145825	0.0150142	710	cell cortex [GO:0005938]; cytoplasmic ribonucleoprotein granule [GO:0036464]; extracellular exosome [GO:0070062]; intracellular ribonucleoprotein complex [GO:0030529]; membrane [GO:0016020]; nucleolus [GO:0005730]; nucleoplasm [GO:0005654]; nucleus [GO:0005634]; DNA topoisomerase binding [GO:0044547]; identical protein binding [GO:0042802]; mRNA 5'-UTR binding [GO:0048027]; protein C-terminus bin…	cell cortex [GO:0005938]; cytoplasmic ribonucleoprotein granule [GO:0036464]; extracellular exosome [GO:0070062]; intracellular ribonucleoprotein complex [GO:0030529]; membrane [GO:0016020]; nucleolus [GO:0005730]; nucleoplasm [GO:0005654]; nucleus [GO:0005634]; DNA topoisomerase binding [GO:0044547]; identical protein binding [GO:0042802]; mRNA 5'-UTR binding [GO:0048027]; protein C-terminus bin…	cell cortex [GO:0005938]; cytoplasmic ribonucleoprotein granule [GO:0036464]; extracellular exosome [GO:0070062]; intracellular ribonucleoprotein complex [GO:0030529]; membrane [GO:0016020]; nucleolus [GO:0005730]; nucleoplasm [GO:0005654]; nucleus [GO:0005634]; DNA topoisomerase binding [GO:0044547]; identical protein binding [GO:0042802]; mRNA 5'-UTR binding [GO:0048027]; protein C-terminus bin…	Nucleolin is the major nucleolar protein of growing eukaryotic cells. It is found associated with intranucleolar chromatin and pre-ribosomal particles. It induces chromatin decondensation by binding to histone H1. It is thought to play a role in pre-rRNA transcription and ribosome assembly. May play a role in the process of transcriptional elongation. Binds RNA oligonucleotides with 5'-UUAGGG-3' …	76614	77
LAMB2_HUMAN	-0.105751	0.00109423	LAMB2	LAMB2 LAMS	Laminin subunit beta-2	-3.81094	-3.31618	0.00309178	0.110441	0.113342	2.35568	20	0.0186794	0.00462016	0.00610162	1798	basal lamina [GO:0005605]; basement membrane [GO:0005604]; extracellular exosome [GO:0070062]; extracellular region [GO:0005576]; extracellular space [GO:0005615]; laminin-11 complex [GO:0043260]; laminin-3 complex [GO:0005608]; synaptic cleft [GO:0043083]; integrin binding [GO:0005178]; structural molecule activity [GO:0005198]; astrocyte development [GO:0014002]; axon extension involved in rege…	basal lamina [GO:0005605]; basement membrane [GO:0005604]; extracellular exosome [GO:0070062]; extracellular region [GO:0005576]; extracellular space [GO:0005615]; laminin-11 complex [GO:0043260]; laminin-3 complex [GO:0005608]; synaptic cleft [GO:0043083]; integrin binding [GO:0005178]; structural molecule activity [GO:0005198]; astrocyte development [GO:0014002]; axon extension involved in rege…	basal lamina [GO:0005605]; basement membrane [GO:0005604]; extracellular exosome [GO:0070062]; extracellular region [GO:0005576]; extracellular space [GO:0005615]; laminin-11 complex [GO:0043260]; laminin-3 complex [GO:0005608]; synaptic cleft [GO:0043083]; integrin binding [GO:0005178]; structural molecule activity [GO:0005198]; astrocyte development [GO:0014002]; axon extension involved in rege…	Binding to cells via a high affinity receptor, laminin is thought to mediate the attachment, migration and organization of cells into tissues during embryonic development by interacting with other extracellular matrix components.	195981	196
PGAM5_HUMAN	-0.105972	0.0275857	PGAM5	PGAM5	Serine/threonine-protein phosphatase PGAM5	-2.37636	-2.30857	0.0305825	0.215884	0.224531	2.35568	20	0.0186794	0.0119319	0.0126429	289	integral component of membrane [GO:0016021]; mitochondrial outer membrane [GO:0005741]; mitochondrion [GO:0005739]; GTPase activator activity [GO:0005096]; phosphatase activity [GO:0016791]; protein complex binding [GO:0032403]; signal transducer, downstream of receptor, with serine/threonine phosphatase activity [GO:0009400]; necroptotic process [GO:0070266]	integral component of membrane [GO:0016021]; mitochondrial outer membrane [GO:0005741]; mitochondrion [GO:0005739]; GTPase activator activity [GO:0005096]; phosphatase activity [GO:0016791]; protein complex binding [GO:0032403]; signal transducer, downstream of receptor, with serine/threonine phosphatase activity [GO:0009400]; necroptotic process [GO:0070266]	integral component of membrane [GO:0016021]; mitochondrial outer membrane [GO:0005741]; mitochondrion [GO:0005739]; GTPase activator activity [GO:0005096]; phosphatase activity [GO:0016791]; protein complex binding [GO:0032403]; signal transducer, downstream of receptor, with serine/threonine phosphatase activity [GO:0009400]; necroptotic process [GO:0070266]	Displays phosphatase activity for serine/threonine residues, and, dephosphorylates and activates MAP3K5 kinase. Has apparently no phosphoglycerate mutase activity. May be regulator of mitochondrial dynamics. Substrate for a KEAP1-dependent ubiquitin ligase complex. Contributes to the repression of NFE2L2-dependent gene expression. Acts as a central mediator for programmed necrosis induced by TNF,…	32004	32
FBRL_HUMAN	-0.106554	0.0387005	FBL	FBL FIB1 FLRN	rRNA 2'-O-methyltransferase fibrillarin	-2.21285	-2.17395	0.0405652	0.251676	0.254295	2.35568	20	0.0186794	0.0139118	0.0144142	321	box C/D snoRNP complex [GO:0031428]; Cajal body [GO:0015030]; chromosome [GO:0005694]; dense fibrillar component [GO:0001651]; extracellular exosome [GO:0070062]; fibrillar center [GO:0001650]; granular component [GO:0001652]; membrane [GO:0016020]; nucleolus [GO:0005730]; nucleoplasm [GO:0005654]; nucleus [GO:0005634]; small-subunit processome [GO:0032040]; ATPase binding [GO:0051117]; histone-g…	box C/D snoRNP complex [GO:0031428]; Cajal body [GO:0015030]; chromosome [GO:0005694]; dense fibrillar component [GO:0001651]; extracellular exosome [GO:0070062]; fibrillar center [GO:0001650]; granular component [GO:0001652]; membrane [GO:0016020]; nucleolus [GO:0005730]; nucleoplasm [GO:0005654]; nucleus [GO:0005634]; small-subunit processome [GO:0032040]; ATPase binding [GO:0051117]; histone-g…	box C/D snoRNP complex [GO:0031428]; Cajal body [GO:0015030]; chromosome [GO:0005694]; dense fibrillar component [GO:0001651]; extracellular exosome [GO:0070062]; fibrillar center [GO:0001650]; granular component [GO:0001652]; membrane [GO:0016020]; nucleolus [GO:0005730]; nucleoplasm [GO:0005654]; nucleus [GO:0005634]; small-subunit processome [GO:0032040]; ATPase binding [GO:0051117]; histone-g…	S-adenosyl-L-methionine-dependent methyltransferase that has the ability to methylate both RNAs and proteins. Involved in pre-rRNA processing by catalyzing the site-specific 2'-hydroxyl methylation of ribose moieties in pre-ribosomal RNA. Site specificity is provided by a guide RNA that base pairs with the substrate. Methylation occurs at a characteristic distance from the sequence involved in ba…	33784	34
HP1B3_HUMAN	-0.106657	0.000716202	HP1BP3	HP1BP3	Heterochromatin protein 1-binding protein 3	-3.99236	-3.43065	0.00235015	0.110441	0.111706	2.35568	20	0.0186794	0.00428221	0.00579929	553	chromosome [GO:0005694]; nuclear speck [GO:0016607]; nucleosome [GO:0000786]; nucleus [GO:0005634]; DNA binding [GO:0003677]; nucleosome binding [GO:0031491]; cellular response to hypoxia [GO:0071456]; heterochromatin organization [GO:0070828]; nucleosome assembly [GO:0006334]; regulation of cell proliferation [GO:0042127]; regulation of nucleus size [GO:0097298]; regulation of transcription, DNA…	chromosome [GO:0005694]; nuclear speck [GO:0016607]; nucleosome [GO:0000786]; nucleus [GO:0005634]; DNA binding [GO:0003677]; nucleosome binding [GO:0031491]; cellular response to hypoxia [GO:0071456]; heterochromatin organization [GO:0070828]; nucleosome assembly [GO:0006334]; regulation of cell proliferation [GO:0042127]; regulation of nucleus size [GO:0097298]; regulation of transcription, DNA…	chromosome [GO:0005694]; nuclear speck [GO:0016607]; nucleosome [GO:0000786]; nucleus [GO:0005634]; DNA binding [GO:0003677]; nucleosome binding [GO:0031491]; cellular response to hypoxia [GO:0071456]; heterochromatin organization [GO:0070828]; nucleosome assembly [GO:0006334]; regulation of cell proliferation [GO:0042127]; regulation of nucleus size [GO:0097298]; regulation of transcription, DNA…	Component of heterochromatin that maintains heterochromatin integrity during G1/S progression and regulates the duration of G1 phase to critically influence cell proliferative capacity (PubMed:24830416). Mediates chromatin condensation during hypoxia, leading to increased tumor cell viability, radio-resistance, chemo-resistance and self-renewal(PubMed:25100860). {ECO:0000269|PubMed:24830416, ECO:…	61207	61
ACSL3_HUMAN	-0.106796	0.0463615	ACSL3	ACSL3 ACS3 FACL3 LACS3	Long-chain-fatty-acid--CoA ligase 3	-2.1237	-2.09831	0.0473905	0.270952	0.271153	2.35568	20	0.0186794	0.0151732	0.0155426	720	endoplasmic reticulum [GO:0005783]; endoplasmic reticulum membrane [GO:0005789]; Golgi apparatus [GO:0005794]; integral component of membrane [GO:0016021]; lipid particle [GO:0005811]; membrane [GO:0016020]; mitochondrial outer membrane [GO:0005741]; perinuclear region of cytoplasm [GO:0048471]; peroxisomal membrane [GO:0005778]; ATP binding [GO:0005524]; decanoate--CoA ligase activity [GO:010239…	endoplasmic reticulum [GO:0005783]; endoplasmic reticulum membrane [GO:0005789]; Golgi apparatus [GO:0005794]; integral component of membrane [GO:0016021]; lipid particle [GO:0005811]; membrane [GO:0016020]; mitochondrial outer membrane [GO:0005741]; perinuclear region of cytoplasm [GO:0048471]; peroxisomal membrane [GO:0005778]; ATP binding [GO:0005524]; decanoate--CoA ligase activity [GO:010239…	endoplasmic reticulum [GO:0005783]; endoplasmic reticulum membrane [GO:0005789]; Golgi apparatus [GO:0005794]; integral component of membrane [GO:0016021]; lipid particle [GO:0005811]; membrane [GO:0016020]; mitochondrial outer membrane [GO:0005741]; perinuclear region of cytoplasm [GO:0048471]; peroxisomal membrane [GO:0005778]; ATP binding [GO:0005524]; decanoate--CoA ligase activity [GO:010239…	Acyl-CoA synthetases (ACSL) activates long-chain fatty acids for both synthesis of cellular lipids, and degradation via beta-oxidation. ACSL3 mediates hepatic lipogenesis (By similarity). Preferentially uses myristate, laurate, arachidonate and eicosapentaenoate as substrates (By similarity). Has mainly an anabolic role in energy metabolism. Required for the incorporation of fatty acids into phos…	80420	80
KS6A5_HUMAN	-0.107092	0.0491743	RPS6KA5	RPS6KA5 MSK1	Ribosomal protein S6 kinase alpha-5	-2.09431	-2.07358	0.0498359	0.277193	0.275917	2.35568	20	0.0186794	0.0156886	0.0160038	802	cytoplasm [GO:0005737]; nucleoplasm [GO:0005654]; nucleus [GO:0005634]; ATP binding [GO:0005524]; magnesium ion binding [GO:0000287]; protein kinase activity [GO:0004672]; protein serine/threonine kinase activity [GO:0004674]; axon guidance [GO:0007411]; epidermal growth factor receptor signaling pathway [GO:0007173]; histone H2A-S1 phosphorylation [GO:0043990]; histone H3-S10 phosphorylation [GO…	cytoplasm [GO:0005737]; nucleoplasm [GO:0005654]; nucleus [GO:0005634]; ATP binding [GO:0005524]; magnesium ion binding [GO:0000287]; protein kinase activity [GO:0004672]; protein serine/threonine kinase activity [GO:0004674]; axon guidance [GO:0007411]; epidermal growth factor receptor signaling pathway [GO:0007173]; histone H2A-S1 phosphorylation [GO:0043990]; histone H3-S10 phosphorylation [GO…	cytoplasm [GO:0005737]; nucleoplasm [GO:0005654]; nucleus [GO:0005634]; ATP binding [GO:0005524]; magnesium ion binding [GO:0000287]; protein kinase activity [GO:0004672]; protein serine/threonine kinase activity [GO:0004674]; axon guidance [GO:0007411]; epidermal growth factor receptor signaling pathway [GO:0007173]; histone H2A-S1 phosphorylation [GO:0043990]; histone H3-S10 phosphorylation [GO…	Serine/threonine-protein kinase that is required for the mitogen or stress-induced phosphorylation of the transcription factors CREB1 and ATF1 and for the regulation of the transcription factors RELA, STAT3 and ETV1/ER81, and that contributes to gene activation by histone phosphorylation and functions in the regulation of inflammatory genes. Phosphorylates CREB1 and ATF1 in response to mitogenic …	89865	90
SRP54_HUMAN	-0.10778	0.0282114	SRP54	SRP54	Signal recognition particle 54 kDa protein	-2.36566	-2.30572	0.0307684	0.216883	0.225451	2.35568	20	0.0186794	0.0124543	0.0131102	504	cytoplasm [GO:0005737]; cytosol [GO:0005829]; nuclear speck [GO:0016607]; nucleus [GO:0005634]; signal recognition particle, endoplasmic reticulum targeting [GO:0005786]; 7S RNA binding [GO:0008312]; drug binding [GO:0008144]; endoplasmic reticulum signal peptide binding [GO:0030942]; GDP binding [GO:0019003]; GTP binding [GO:0005525]; GTPase activity [GO:0003924]; ribonucleoprotein complex bindi…	cytoplasm [GO:0005737]; cytosol [GO:0005829]; nuclear speck [GO:0016607]; nucleus [GO:0005634]; signal recognition particle, endoplasmic reticulum targeting [GO:0005786]; 7S RNA binding [GO:0008312]; drug binding [GO:0008144]; endoplasmic reticulum signal peptide binding [GO:0030942]; GDP binding [GO:0019003]; GTP binding [GO:0005525]; GTPase activity [GO:0003924]; ribonucleoprotein complex bindi…	cytoplasm [GO:0005737]; cytosol [GO:0005829]; nuclear speck [GO:0016607]; nucleus [GO:0005634]; signal recognition particle, endoplasmic reticulum targeting [GO:0005786]; 7S RNA binding [GO:0008312]; drug binding [GO:0008144]; endoplasmic reticulum signal peptide binding [GO:0030942]; GDP binding [GO:0019003]; GTP binding [GO:0005525]; GTPase activity [GO:0003924]; ribonucleoprotein complex bindi…	Binds to the signal sequence of presecretory protein when they emerge from the ribosomes and transfers them to TRAM (translocating chain-associating membrane protein).	55705	56
HYEP_HUMAN	-0.108116	0.0147999	EPHX1	EPHX1 EPHX EPOX	Epoxide hydrolase 1	-2.66725	-2.54975	0.0181332	0.169052	0.180167	2.35568	20	0.0186794	0.00985829	0.0107878	455	endoplasmic reticulum membrane [GO:0005789]; integral component of membrane [GO:0016021]; organelle membrane [GO:0031090]; cis-stilbene-oxide hydrolase activity [GO:0033961]; epoxide hydrolase activity [GO:0004301]; aromatic compound catabolic process [GO:0019439]; response to organic cyclic compound [GO:0014070]; response to toxic substance [GO:0009636]; xenobiotic metabolic process [GO:0006805]	endoplasmic reticulum membrane [GO:0005789]; integral component of membrane [GO:0016021]; organelle membrane [GO:0031090]; cis-stilbene-oxide hydrolase activity [GO:0033961]; epoxide hydrolase activity [GO:0004301]; aromatic compound catabolic process [GO:0019439]; response to organic cyclic compound [GO:0014070]; response to toxic substance [GO:0009636]; xenobiotic metabolic process [GO:0006805]	endoplasmic reticulum membrane [GO:0005789]; integral component of membrane [GO:0016021]; organelle membrane [GO:0031090]; cis-stilbene-oxide hydrolase activity [GO:0033961]; epoxide hydrolase activity [GO:0004301]; aromatic compound catabolic process [GO:0019439]; response to organic cyclic compound [GO:0014070]; response to toxic substance [GO:0009636]; xenobiotic metabolic process [GO:0006805]	Biotransformation enzyme that catalyzes the hydrolysis of arene and aliphatic epoxides to less reactive and more water soluble dihydrodiols by the trans addition of water.	52949	53
SYMPK_HUMAN	-0.108263	0.0162155	SYMPK	SYMPK SPK	Symplekin	-2.62525	-2.51739	0.0194727	0.175569	0.185798	2.35568	20	0.0186794	0.0102041	0.0110972	1274	bicellular tight junction [GO:0005923]; cytoplasm [GO:0005737]; cytoskeleton [GO:0005856]; cytosol [GO:0005829]; nuclear stress granule [GO:0097165]; nucleoplasm [GO:0005654]; plasma membrane [GO:0005886]; cell adhesion [GO:0007155]; mRNA 3'-end processing [GO:0031124]; mRNA export from nucleus [GO:0006406]; mRNA polyadenylation [GO:0006378]; mRNA splicing, via spliceosome [GO:0000398]; positive …	bicellular tight junction [GO:0005923]; cytoplasm [GO:0005737]; cytoskeleton [GO:0005856]; cytosol [GO:0005829]; nuclear stress granule [GO:0097165]; nucleoplasm [GO:0005654]; plasma membrane [GO:0005886]; cell adhesion [GO:0007155]; mRNA 3'-end processing [GO:0031124]; mRNA export from nucleus [GO:0006406]; mRNA polyadenylation [GO:0006378]; mRNA splicing, via spliceosome [GO:0000398]; positive …	bicellular tight junction [GO:0005923]; cytoplasm [GO:0005737]; cytoskeleton [GO:0005856]; cytosol [GO:0005829]; nuclear stress granule [GO:0097165]; nucleoplasm [GO:0005654]; plasma membrane [GO:0005886]; cell adhesion [GO:0007155]; mRNA 3'-end processing [GO:0031124]; mRNA export from nucleus [GO:0006406]; mRNA polyadenylation [GO:0006378]; mRNA splicing, via spliceosome [GO:0000398]; positive …	Scaffold protein that functions as a component of a multimolecular complex involved in histone mRNA 3'-end processing. Specific component of the tight junction (TJ) plaque, but might not be an exclusively junctional component. May have a house-keeping rule. Is involved in pre-mRNA polyadenylation. Enhances SSU72 phosphatase activity. {ECO:0000269|PubMed:16230528, ECO:0000269|PubMed:20861839}.	141148	141
MYOME_HUMAN	-0.10891	0.0250055	PDE4DIP	PDE4DIP CMYA2 KIAA0454 KIAA0477 MMGL	Myomegalin	-2.42301	-2.35677	0.0275942	0.207886	0.21655	2.35568	20	0.0186794	0.012122	0.012813	2346	centrosome [GO:0005813]; cytoplasm [GO:0005737]; Golgi apparatus [GO:0005794]; myofibril [GO:0030016]; nucleus [GO:0005634]; enzyme binding [GO:0019899]; cellular protein complex assembly [GO:0043623]	centrosome [GO:0005813]; cytoplasm [GO:0005737]; Golgi apparatus [GO:0005794]; myofibril [GO:0030016]; nucleus [GO:0005634]; enzyme binding [GO:0019899]; cellular protein complex assembly [GO:0043623]	centrosome [GO:0005813]; cytoplasm [GO:0005737]; Golgi apparatus [GO:0005794]; myofibril [GO:0030016]; nucleus [GO:0005634]; enzyme binding [GO:0019899]; cellular protein complex assembly [GO:0043623]	May function as an anchor sequestering components of the cAMP-dependent pathway to Golgi and/or centrosomes. {ECO:0000250}.	265080	265
PSPC1_HUMAN	-0.109497	0.00676886	PSPC1	PSPC1 PSP1	Paraspeckle component 1	-3.01969	-2.8231	0.00980687	0.138863	0.146548	2.35568	20	0.0186794	0.00788911	0.00902611	523	cytoplasm [GO:0005737]; fibrillar center [GO:0001650]; nuclear matrix [GO:0016363]; nuclear speck [GO:0016607]; nucleoplasm [GO:0005654]; nucleus [GO:0005634]; paraspeckles [GO:0042382]; core promoter binding [GO:0001047]; RNA binding [GO:0003723]; transcription regulatory region sequence-specific DNA binding [GO:0000976]; mRNA splicing, via spliceosome [GO:0000398]; negative regulation of transc…	cytoplasm [GO:0005737]; fibrillar center [GO:0001650]; nuclear matrix [GO:0016363]; nuclear speck [GO:0016607]; nucleoplasm [GO:0005654]; nucleus [GO:0005634]; paraspeckles [GO:0042382]; core promoter binding [GO:0001047]; RNA binding [GO:0003723]; transcription regulatory region sequence-specific DNA binding [GO:0000976]; mRNA splicing, via spliceosome [GO:0000398]; negative regulation of transc…	cytoplasm [GO:0005737]; fibrillar center [GO:0001650]; nuclear matrix [GO:0016363]; nuclear speck [GO:0016607]; nucleoplasm [GO:0005654]; nucleus [GO:0005634]; paraspeckles [GO:0042382]; core promoter binding [GO:0001047]; RNA binding [GO:0003723]; transcription regulatory region sequence-specific DNA binding [GO:0000976]; mRNA splicing, via spliceosome [GO:0000398]; negative regulation of transc…	Regulates, cooperatively with NONO and SFPQ, androgen receptor-mediated gene transcription activity in Sertoli cell line (By similarity). Binds to poly(A), poly(G) and poly(U) RNA homopolymers. Regulates the circadian clock by repressing the transcriptional activator activity of the CLOCK-ARNTL/BMAL1 heterodimer (By similarity). Together with NONO, required for the formation of nuclear paraspeckl…	58744	59
NFKB1_HUMAN	-0.109572	0.0030655	NFKB1	NFKB1	Nuclear factor NF-kappa-B p105 subunit	-3.36705	-3.06807	0.00556118	0.122032	0.128573	2.35568	20	0.0186794	0.00635411	0.00765286	968	cytoplasm [GO:0005737]; cytosol [GO:0005829]; extracellular region [GO:0005576]; I-kappaB/NF-kappaB complex [GO:0033256]; mitochondrion [GO:0005739]; nucleoplasm [GO:0005654]; nucleus [GO:0005634]; secretory granule lumen [GO:0034774]; specific granule lumen [GO:0035580]; actinin binding [GO:0042805]; chromatin binding [GO:0003682]; identical protein binding [GO:0042802]; protein heterodimerizati…	cytoplasm [GO:0005737]; cytosol [GO:0005829]; extracellular region [GO:0005576]; I-kappaB/NF-kappaB complex [GO:0033256]; mitochondrion [GO:0005739]; nucleoplasm [GO:0005654]; nucleus [GO:0005634]; secretory granule lumen [GO:0034774]; specific granule lumen [GO:0035580]; actinin binding [GO:0042805]; chromatin binding [GO:0003682]; identical protein binding [GO:0042802]; protein heterodimerizati…	cytoplasm [GO:0005737]; cytosol [GO:0005829]; extracellular region [GO:0005576]; I-kappaB/NF-kappaB complex [GO:0033256]; mitochondrion [GO:0005739]; nucleoplasm [GO:0005654]; nucleus [GO:0005634]; secretory granule lumen [GO:0034774]; specific granule lumen [GO:0035580]; actinin binding [GO:0042805]; chromatin binding [GO:0003682]; identical protein binding [GO:0042802]; protein heterodimerizati…	NF-kappa-B is a pleiotropic transcription factor present in almost all cell types and is the endpoint of a series of signal transduction events that are initiated by a vast array of stimuli related to many biological processes such as inflammation, immunity, differentiation, cell growth, tumorigenesis and apoptosis. NF-kappa-B is a homo- or heterodimeric complex formed by the Rel-like domain-cont…	105356	105
HMGB1_HUMAN	-0.109729	0.0185714	HMGB1	HMGB1 HMG1	High mobility group protein B1	-2.56248	-2.47316	0.0214535	0.183082	0.193924	2.35568	20	0.0186794	0.0110021	0.011811	215	cell surface [GO:0009986]; condensed chromosome [GO:0000793]; endoplasmic reticulum-Golgi intermediate compartment [GO:0005793]; endosome [GO:0005768]; extracellular region [GO:0005576]; extracellular space [GO:0005615]; ficolin-1-rich granule lumen [GO:1904813]; nucleoplasm [GO:0005654]; nucleus [GO:0005634]; plasma membrane [GO:0005886]; secretory granule lumen [GO:0034774]; bubble DNA binding …	cell surface [GO:0009986]; condensed chromosome [GO:0000793]; endoplasmic reticulum-Golgi intermediate compartment [GO:0005793]; endosome [GO:0005768]; extracellular region [GO:0005576]; extracellular space [GO:0005615]; ficolin-1-rich granule lumen [GO:1904813]; nucleoplasm [GO:0005654]; nucleus [GO:0005634]; plasma membrane [GO:0005886]; secretory granule lumen [GO:0034774]; bubble DNA binding …	cell surface [GO:0009986]; condensed chromosome [GO:0000793]; endoplasmic reticulum-Golgi intermediate compartment [GO:0005793]; endosome [GO:0005768]; extracellular region [GO:0005576]; extracellular space [GO:0005615]; ficolin-1-rich granule lumen [GO:1904813]; nucleoplasm [GO:0005654]; nucleus [GO:0005634]; plasma membrane [GO:0005886]; secretory granule lumen [GO:0034774]; bubble DNA binding …	Multifunctional redox sensitive protein with various roles in different cellular compartments. In the nucleus is one of the major chromatin-associated non-histone proteins and acts as a DNA chaperone involved in replication, transcription, chromatin remodeling, V(D)J recombination, DNA repair and genome stability. Proposed to be an universal biosensor for nucleic acids. Promotes host inflammatory…	24894	25
CJ071_HUMAN	-0.109903	0.0265833	C10orf71	C10orf71	Uncharacterized protein C10orf71	-2.39398	-2.33597	0.0288492	0.213336	0.219124	2.35568	20	0.0186794	0.0126453	0.0132811	1435					156477	156
SMCE1_HUMAN	-0.111652	0.0184105	SMARCE1	SMARCE1 BAF57	SWI/SNF-related matrix-associated actin-dependent regulator of chromatin subfamily E member 1	-2.56652	-2.48351	0.020974	0.183082	0.192118	2.35568	20	0.0186794	0.0113552	0.012127	411	nBAF complex [GO:0071565]; npBAF complex [GO:0071564]; nuclear chromatin [GO:0000790]; nuclear chromosome [GO:0000228]; nucleoplasm [GO:0005654]; nucleus [GO:0005634]; protein complex [GO:0043234]; SWI/SNF complex [GO:0016514]; transcriptional repressor complex [GO:0017053]; chromatin binding [GO:0003682]; DNA binding [GO:0003677]; ligand-dependent nuclear receptor binding [GO:0016922]; N-acetylt…	nBAF complex [GO:0071565]; npBAF complex [GO:0071564]; nuclear chromatin [GO:0000790]; nuclear chromosome [GO:0000228]; nucleoplasm [GO:0005654]; nucleus [GO:0005634]; protein complex [GO:0043234]; SWI/SNF complex [GO:0016514]; transcriptional repressor complex [GO:0017053]; chromatin binding [GO:0003682]; DNA binding [GO:0003677]; ligand-dependent nuclear receptor binding [GO:0016922]; N-acetylt…	nBAF complex [GO:0071565]; npBAF complex [GO:0071564]; nuclear chromatin [GO:0000790]; nuclear chromosome [GO:0000228]; nucleoplasm [GO:0005654]; nucleus [GO:0005634]; protein complex [GO:0043234]; SWI/SNF complex [GO:0016514]; transcriptional repressor complex [GO:0017053]; chromatin binding [GO:0003682]; DNA binding [GO:0003677]; ligand-dependent nuclear receptor binding [GO:0016922]; N-acetylt…	Involved in transcriptional activation and repression of select genes by chromatin remodeling (alteration of DNA-nucleosome topology). Belongs to the neural progenitors-specific chromatin remodeling complex (npBAF complex) and the neuron-specific chromatin remodeling complex (nBAF complex). During neural development a switch from a stem/progenitor to a postmitotic chromatin remodeling mechanism o…	46649	47
SARNP_HUMAN	-0.111806	0.0136346	SARNP	SARNP HCC1 HSPC316	SAP domain-containing ribonucleoprotein	-2.70478	-2.59474	0.0164132	0.164265	0.173471	2.35568	20	0.0186794	0.0102523	0.0111402	210	nuclear speck [GO:0016607]; nucleoplasm [GO:0005654]; nucleus [GO:0005634]; P-body [GO:0000932]; transcription export complex [GO:0000346]; DNA binding [GO:0003677]; RNA binding [GO:0003723]; mRNA 3'-end processing [GO:0031124]; mRNA export from nucleus [GO:0006406]; regulation of transcription, DNA-templated [GO:0006355]; regulation of translation [GO:0006417]; RNA export from nucleus [GO:000640…	nuclear speck [GO:0016607]; nucleoplasm [GO:0005654]; nucleus [GO:0005634]; P-body [GO:0000932]; transcription export complex [GO:0000346]; DNA binding [GO:0003677]; RNA binding [GO:0003723]; mRNA 3'-end processing [GO:0031124]; mRNA export from nucleus [GO:0006406]; regulation of transcription, DNA-templated [GO:0006355]; regulation of translation [GO:0006417]; RNA export from nucleus [GO:000640…	nuclear speck [GO:0016607]; nucleoplasm [GO:0005654]; nucleus [GO:0005634]; P-body [GO:0000932]; transcription export complex [GO:0000346]; DNA binding [GO:0003677]; RNA binding [GO:0003723]; mRNA 3'-end processing [GO:0031124]; mRNA export from nucleus [GO:0006406]; regulation of transcription, DNA-templated [GO:0006355]; regulation of translation [GO:0006417]; RNA export from nucleus [GO:000640…	Binds both single-stranded and double-stranded DNA with higher affinity for the single-stranded form. Specifically binds to scaffold/matrix attachment region DNA. Also binds single-stranded RNA. Enhances RNA unwinding activity of DDX39A. May participate in important transcriptional or translational control of cell growth, metabolism and carcinogenesis. Component of the TREX complex which is thoug…	23671	24
CPSF6_HUMAN	-0.111878	0.0198689	CPSF6	CPSF6 CFIM68	Cleavage and polyadenylation specificity factor subunit 6	-2.53104	-2.45544	0.0222985	0.187013	0.195963	2.35568	20	0.0186794	0.011723	0.012456	551	intracellular ribonucleoprotein complex [GO:0030529]; membrane [GO:0016020]; mRNA cleavage factor complex [GO:0005849]; nuclear speck [GO:0016607]; nucleoplasm [GO:0005654]; nucleus [GO:0005634]; paraspeckles [GO:0042382]; mRNA binding [GO:0003729]; RNA binding [GO:0003723]; mRNA polyadenylation [GO:0006378]; mRNA processing [GO:0006397]; protein tetramerization [GO:0051262]	intracellular ribonucleoprotein complex [GO:0030529]; membrane [GO:0016020]; mRNA cleavage factor complex [GO:0005849]; nuclear speck [GO:0016607]; nucleoplasm [GO:0005654]; nucleus [GO:0005634]; paraspeckles [GO:0042382]; mRNA binding [GO:0003729]; RNA binding [GO:0003723]; mRNA polyadenylation [GO:0006378]; mRNA processing [GO:0006397]; protein tetramerization [GO:0051262]	intracellular ribonucleoprotein complex [GO:0030529]; membrane [GO:0016020]; mRNA cleavage factor complex [GO:0005849]; nuclear speck [GO:0016607]; nucleoplasm [GO:0005654]; nucleus [GO:0005634]; paraspeckles [GO:0042382]; mRNA binding [GO:0003729]; RNA binding [GO:0003723]; mRNA polyadenylation [GO:0006378]; mRNA processing [GO:0006397]; protein tetramerization [GO:0051262]	Component of the cleavage factor Im complex (CFIm) that plays a key role in pre-mRNA 3'-processing. Involved in association with NUDT21/CPSF5 in pre-MRNA 3'-end poly(A) site cleavage and poly(A) addition. CPSF6 binds to cleavage and polyadenylation RNA substrates and promotes RNA looping. {ECO:0000269|PubMed:14690600, ECO:0000269|PubMed:20695905, ECO:0000269|PubMed:21295486, ECO:0000269|PubMed:86…	59210	59
GTF2I_HUMAN	-0.111939	0.00477704	GTF2I	GTF2I BAP135 WBSCR6	General transcription factor II-I	-3.17343	-2.94864	0.00734548	0.131017	0.132722	2.35568	20	0.0186794	0.00746547	0.00864711	998	cell projection [GO:0042995]; cytoplasm [GO:0005737]; membrane [GO:0016020]; neuronal cell body [GO:0043025]; nucleoplasm [GO:0005654]; nucleus [GO:0005634]; DNA binding [GO:0003677]; mitogen-activated protein kinase binding [GO:0051019]; RNA polymerase II transcription factor activity, sequence-specific DNA binding [GO:0000981]; transcription factor activity, sequence-specific DNA binding [GO:00…	cell projection [GO:0042995]; cytoplasm [GO:0005737]; membrane [GO:0016020]; neuronal cell body [GO:0043025]; nucleoplasm [GO:0005654]; nucleus [GO:0005634]; DNA binding [GO:0003677]; mitogen-activated protein kinase binding [GO:0051019]; RNA polymerase II transcription factor activity, sequence-specific DNA binding [GO:0000981]; transcription factor activity, sequence-specific DNA binding [GO:00…	cell projection [GO:0042995]; cytoplasm [GO:0005737]; membrane [GO:0016020]; neuronal cell body [GO:0043025]; nucleoplasm [GO:0005654]; nucleus [GO:0005634]; DNA binding [GO:0003677]; mitogen-activated protein kinase binding [GO:0051019]; RNA polymerase II transcription factor activity, sequence-specific DNA binding [GO:0000981]; transcription factor activity, sequence-specific DNA binding [GO:00…	Interacts with the basal transcription machinery by coordinating the formation of a multiprotein complex at the C-FOS promoter, and linking specific signal responsive activator complexes. Promotes the formation of stable high-order complexes of SRF and PHOX1 and interacts cooperatively with PHOX1 to promote serum-inducible transcription of a reporter gene deriven by the C-FOS serum response eleme…	112416	112
DYSF_HUMAN	-0.111998	0.00402153	DYSF	DYSF FER1L1	Dysferlin	-3.24882	-3.00268	0.00647897	0.123391	0.131675	2.35568	20	0.0186794	0.00713054	0.00834748	2080	cytoplasmic vesicle membrane [GO:0030659]; early endosome [GO:0005769]; endocytic vesicle [GO:0030139]; endosome [GO:0005768]; extracellular exosome [GO:0070062]; integral component of membrane [GO:0016021]; lamellipodium [GO:0030027]; late endosome [GO:0005770]; microtubule organizing center [GO:0005815]; plasma membrane [GO:0005886]; sarcolemma [GO:0042383]; T-tubule [GO:0030315]; calcium ion b…	cytoplasmic vesicle membrane [GO:0030659]; early endosome [GO:0005769]; endocytic vesicle [GO:0030139]; endosome [GO:0005768]; extracellular exosome [GO:0070062]; integral component of membrane [GO:0016021]; lamellipodium [GO:0030027]; late endosome [GO:0005770]; microtubule organizing center [GO:0005815]; plasma membrane [GO:0005886]; sarcolemma [GO:0042383]; T-tubule [GO:0030315]; calcium ion b…	cytoplasmic vesicle membrane [GO:0030659]; early endosome [GO:0005769]; endocytic vesicle [GO:0030139]; endosome [GO:0005768]; extracellular exosome [GO:0070062]; integral component of membrane [GO:0016021]; lamellipodium [GO:0030027]; late endosome [GO:0005770]; microtubule organizing center [GO:0005815]; plasma membrane [GO:0005886]; sarcolemma [GO:0042383]; T-tubule [GO:0030315]; calcium ion b…	Key calcium ion sensor involved in the Ca(2+)-triggered synaptic vesicle-plasma membrane fusion. Plays a role in the sarcolemma repair mechanism of both skeletal muscle and cardiomyocytes that permits rapid resealing of membranes disrupted by mechanical stress (By similarity). {ECO:0000250}.	237295	237
AN32E_HUMAN	-0.112306	0.0133602	ANP32E	ANP32E	Acidic leucine-rich nuclear phosphoprotein 32 family member E	-2.71406	-2.60412	0.0160744	0.163368	0.171515	2.35568	20	0.0186794	0.0102736	0.0111593	268	cytoplasmic vesicle [GO:0031410]; nucleus [GO:0005634]; Swr1 complex [GO:0000812]; histone binding [GO:0042393]; phosphatase inhibitor activity [GO:0019212]; covalent chromatin modification [GO:0016569]; histone exchange [GO:0043486]	cytoplasmic vesicle [GO:0031410]; nucleus [GO:0005634]; Swr1 complex [GO:0000812]; histone binding [GO:0042393]; phosphatase inhibitor activity [GO:0019212]; covalent chromatin modification [GO:0016569]; histone exchange [GO:0043486]	cytoplasmic vesicle [GO:0031410]; nucleus [GO:0005634]; Swr1 complex [GO:0000812]; histone binding [GO:0042393]; phosphatase inhibitor activity [GO:0019212]; covalent chromatin modification [GO:0016569]; histone exchange [GO:0043486]	Histone chaperone that specifically mediates the genome-wide removal of histone H2A.Z/H2AFZ from the nucleosome: removes H2A.Z/H2AFZ from its normal sites of deposition, especially from enhancer and insulator regions. Not involved in deposition of H2A.Z/H2AFZ in the nucleosome. May stabilize the evicted H2A.Z/H2AFZ-H2B dimer, thus shifting the equilibrium towards dissociation and the off-chromati…	30692	31
DEK_HUMAN	-0.112666	0.0115581	DEK	DEK	Protein DEK	-2.77994	-2.6574	0.0142714	0.156233	0.163429	2.35568	20	0.0186794	0.00985514	0.010785	375	contractile fiber [GO:0043292]; nucleoplasm [GO:0005654]; nucleus [GO:0005634]; chromatin binding [GO:0003682]; DNA binding [GO:0003677]; histone binding [GO:0042393]; RNA binding [GO:0003723]; chromatin remodeling [GO:0006338]; covalent chromatin modification [GO:0016569]; positive regulation of gene expression, epigenetic [GO:0045815]; regulation of double-strand break repair [GO:2000779]; regu…	contractile fiber [GO:0043292]; nucleoplasm [GO:0005654]; nucleus [GO:0005634]; chromatin binding [GO:0003682]; DNA binding [GO:0003677]; histone binding [GO:0042393]; RNA binding [GO:0003723]; chromatin remodeling [GO:0006338]; covalent chromatin modification [GO:0016569]; positive regulation of gene expression, epigenetic [GO:0045815]; regulation of double-strand break repair [GO:2000779]; regu…	contractile fiber [GO:0043292]; nucleoplasm [GO:0005654]; nucleus [GO:0005634]; chromatin binding [GO:0003682]; DNA binding [GO:0003677]; histone binding [GO:0042393]; RNA binding [GO:0003723]; chromatin remodeling [GO:0006338]; covalent chromatin modification [GO:0016569]; positive regulation of gene expression, epigenetic [GO:0045815]; regulation of double-strand break repair [GO:2000779]; regu…	Involved in chromatin organization. {ECO:0000269|PubMed:17524367}.	42674	43
AL9A1_HUMAN	-0.112754	0.0135294	ALDH9A1	ALDH9A1 ALDH4 ALDH7 ALDH9	4-trimethylaminobutyraldehyde dehydrogenase	-2.70832	-2.60139	0.0161723	0.163974	0.171659	2.35568	20	0.0186794	0.0103996	0.011272	494	cytoplasm [GO:0005737]; cytosol [GO:0005829]; extracellular exosome [GO:0070062]; 1-pyrroline dehydrogenase activity [GO:0033737]; 3-chloroallyl aldehyde dehydrogenase activity [GO:0004028]; 4-trimethylammoniobutyraldehyde dehydrogenase activity [GO:0047105]; aldehyde dehydrogenase (NAD) activity [GO:0004029]; aminobutyraldehyde dehydrogenase activity [GO:0019145]; carnitine biosynthetic process …	cytoplasm [GO:0005737]; cytosol [GO:0005829]; extracellular exosome [GO:0070062]; 1-pyrroline dehydrogenase activity [GO:0033737]; 3-chloroallyl aldehyde dehydrogenase activity [GO:0004028]; 4-trimethylammoniobutyraldehyde dehydrogenase activity [GO:0047105]; aldehyde dehydrogenase (NAD) activity [GO:0004029]; aminobutyraldehyde dehydrogenase activity [GO:0019145]; carnitine biosynthetic process …	cytoplasm [GO:0005737]; cytosol [GO:0005829]; extracellular exosome [GO:0070062]; 1-pyrroline dehydrogenase activity [GO:0033737]; 3-chloroallyl aldehyde dehydrogenase activity [GO:0004028]; 4-trimethylammoniobutyraldehyde dehydrogenase activity [GO:0047105]; aldehyde dehydrogenase (NAD) activity [GO:0004029]; aminobutyraldehyde dehydrogenase activity [GO:0019145]; carnitine biosynthetic process …	Converts gamma-trimethylaminobutyraldehyde into gamma-butyrobetaine. Catalyzes the irreversible oxidation of a broad range of aldehydes to the corresponding acids in an NAD-dependent reaction. {ECO:0000269|PubMed:10702312}.	53802	54
DHRS7_HUMAN	-0.113029	0.0224421	DHRS7	DHRS7 DHRS7A RETSDR4 SDR34C1 CGI-86 UNQ285/PRO3448	Dehydrogenase/reductase SDR family member 7	-2.47403	-2.41234	0.024484	0.198517	0.204245	2.35568	20	0.0186794	0.0125234	0.0131721	339	membrane [GO:0016020]; oxidoreductase activity [GO:0016491]	membrane [GO:0016020]; oxidoreductase activity [GO:0016491]	membrane [GO:0016020]; oxidoreductase activity [GO:0016491]		38299	38
PRDX4_HUMAN	-0.113616	0.0456361	PRDX4	PRDX4	Peroxiredoxin-4	-2.13154	-2.12087	0.0452538	0.268633	0.265468	2.35568	20	0.0186794	0.0170468	0.0172188	271	cytosol [GO:0005829]; extracellular exosome [GO:0070062]; extracellular region [GO:0005576]; extracellular space [GO:0005615]; ficolin-1-rich granule lumen [GO:1904813]; mitochondrion [GO:0005739]; nucleus [GO:0005634]; secretory granule lumen [GO:0034774]; smooth endoplasmic reticulum [GO:0005790]; protein homodimerization activity [GO:0042803]; thioredoxin peroxidase activity [GO:0008379]; 4-hy…	cytosol [GO:0005829]; extracellular exosome [GO:0070062]; extracellular region [GO:0005576]; extracellular space [GO:0005615]; ficolin-1-rich granule lumen [GO:1904813]; mitochondrion [GO:0005739]; nucleus [GO:0005634]; secretory granule lumen [GO:0034774]; smooth endoplasmic reticulum [GO:0005790]; protein homodimerization activity [GO:0042803]; thioredoxin peroxidase activity [GO:0008379]; 4-hy…	cytosol [GO:0005829]; extracellular exosome [GO:0070062]; extracellular region [GO:0005576]; extracellular space [GO:0005615]; ficolin-1-rich granule lumen [GO:1904813]; mitochondrion [GO:0005739]; nucleus [GO:0005634]; secretory granule lumen [GO:0034774]; smooth endoplasmic reticulum [GO:0005790]; protein homodimerization activity [GO:0042803]; thioredoxin peroxidase activity [GO:0008379]; 4-hy…	Probably involved in redox regulation of the cell. Regulates the activation of NF-kappa-B in the cytosol by a modulation of I-kappa-B-alpha phosphorylation. {ECO:0000269|PubMed:9388242}.	30540	31
LRC20_HUMAN	-0.113696	0.0264848	LRRC20	LRRC20 UNQ2429/PRO4989	Leucine-rich repeat-containing protein 20	-2.39575	-2.3489	0.0280631	0.213243	0.217957	2.35568	20	0.0186794	0.0135132	0.0140575	184					20509	21
PCNA_HUMAN	-0.113904	0.0150173	PCNA	PCNA	Proliferating cell nuclear antigen	-2.66055	-2.56773	0.0174266	0.169998	0.177214	2.35568	20	0.0186794	0.0109972	0.0118067	261	centrosome [GO:0005813]; DNA replication factor C complex [GO:0005663]; extracellular exosome [GO:0070062]; nuclear body [GO:0016604]; nuclear chromosome, telomeric region [GO:0000784]; nuclear replication fork [GO:0043596]; nucleoplasm [GO:0005654]; nucleus [GO:0005634]; PCNA complex [GO:0043626]; PCNA-p21 complex [GO:0070557]; replication fork [GO:0005657]; replisome [GO:0030894]; chromatin bin…	centrosome [GO:0005813]; DNA replication factor C complex [GO:0005663]; extracellular exosome [GO:0070062]; nuclear body [GO:0016604]; nuclear chromosome, telomeric region [GO:0000784]; nuclear replication fork [GO:0043596]; nucleoplasm [GO:0005654]; nucleus [GO:0005634]; PCNA complex [GO:0043626]; PCNA-p21 complex [GO:0070557]; replication fork [GO:0005657]; replisome [GO:0030894]; chromatin bin…	centrosome [GO:0005813]; DNA replication factor C complex [GO:0005663]; extracellular exosome [GO:0070062]; nuclear body [GO:0016604]; nuclear chromosome, telomeric region [GO:0000784]; nuclear replication fork [GO:0043596]; nucleoplasm [GO:0005654]; nucleus [GO:0005634]; PCNA complex [GO:0043626]; PCNA-p21 complex [GO:0070557]; replication fork [GO:0005657]; replisome [GO:0030894]; chromatin bin…	Auxiliary protein of DNA polymerase delta and is involved in the control of eukaryotic DNA replication by increasing the polymerase's processibility during elongation of the leading strand. Induces a robust stimulatory effect on the 3'-5' exonuclease and 3'-phosphodiesterase, but not apurinic-apyrimidinic (AP) endonuclease, APEX2 activities. Has to be loaded onto DNA in order to be able to stimul…	28769	29
ERLN1_HUMAN	-0.114136	0.0133466	ERLIN1	ERLIN1 C10orf69 KE04 KEO4 SPFH1	Erlin-1	-2.71453	-2.61183	0.015801	0.163368	0.171515	2.35568	20	0.0186794	0.0106074	0.011458	346	endoplasmic reticulum [GO:0005783]; endoplasmic reticulum membrane [GO:0005789]; integral component of membrane [GO:0016021]; protein complex [GO:0043234]; cholesterol binding [GO:0015485]; ubiquitin protein ligase binding [GO:0031625]; cholesterol metabolic process [GO:0008203]; negative regulation of cholesterol biosynthetic process [GO:0045541]; negative regulation of fatty acid biosynthetic p…	endoplasmic reticulum [GO:0005783]; endoplasmic reticulum membrane [GO:0005789]; integral component of membrane [GO:0016021]; protein complex [GO:0043234]; cholesterol binding [GO:0015485]; ubiquitin protein ligase binding [GO:0031625]; cholesterol metabolic process [GO:0008203]; negative regulation of cholesterol biosynthetic process [GO:0045541]; negative regulation of fatty acid biosynthetic p…	endoplasmic reticulum [GO:0005783]; endoplasmic reticulum membrane [GO:0005789]; integral component of membrane [GO:0016021]; protein complex [GO:0043234]; cholesterol binding [GO:0015485]; ubiquitin protein ligase binding [GO:0031625]; cholesterol metabolic process [GO:0008203]; negative regulation of cholesterol biosynthetic process [GO:0045541]; negative regulation of fatty acid biosynthetic p…	Component of the ERLIN1/ERLIN2 complex which mediates the endoplasmic reticulum-associated degradation (ERAD) of inositol 1,4,5-trisphosphate receptors (IP3Rs). Involved in regulation of cellular cholesterol homeostasis by regulation the SREBP signaling pathway. Binds cholesterol and may promote ER retention of the SCAP-SREBF complex (PubMed:24217618). {ECO:0000269|PubMed:19240031, ECO:0000269|Pu…	38926	39
GGPPS_HUMAN	-0.116714	0.00823399	GGPS1	GGPS1	Geranylgeranyl pyrophosphate synthase	-2.93248	-2.79383	0.0104846	0.14131	0.149072	2.35568	20	0.0186794	0.00950452	0.0104713	300	cytosol [GO:0005829]; dimethylallyltranstransferase activity [GO:0004161]; farnesyltranstransferase activity [GO:0004311]; geranyltranstransferase activity [GO:0004337]; identical protein binding [GO:0042802]; metal ion binding [GO:0046872]; cholesterol biosynthetic process [GO:0006695]; farnesyl diphosphate biosynthetic process [GO:0045337]; geranyl diphosphate biosynthetic process [GO:0033384];…	cytosol [GO:0005829]; dimethylallyltranstransferase activity [GO:0004161]; farnesyltranstransferase activity [GO:0004311]; geranyltranstransferase activity [GO:0004337]; identical protein binding [GO:0042802]; metal ion binding [GO:0046872]; cholesterol biosynthetic process [GO:0006695]; farnesyl diphosphate biosynthetic process [GO:0045337]; geranyl diphosphate biosynthetic process [GO:0033384];…	cytosol [GO:0005829]; dimethylallyltranstransferase activity [GO:0004161]; farnesyltranstransferase activity [GO:0004311]; geranyltranstransferase activity [GO:0004337]; identical protein binding [GO:0042802]; metal ion binding [GO:0046872]; cholesterol biosynthetic process [GO:0006695]; farnesyl diphosphate biosynthetic process [GO:0045337]; geranyl diphosphate biosynthetic process [GO:0033384];…	Catalyzes the trans-addition of the three molecules of IPP onto DMAPP to form geranylgeranyl pyrophosphate, an important precursor of carotenoids and geranylated proteins.	34871	35
PP2BB_HUMAN	-0.11677	0.024412	PPP3CB	PPP3CB CALNA2 CALNB CNA2	Serine/threonine-protein phosphatase 2B catalytic subunit beta isoform	-2.43437	-2.39031	0.025676	0.205705	0.208864	2.35568	20	0.0186794	0.0138051	0.0143187	524	calcineurin complex [GO:0005955]; cytosol [GO:0005829]; nucleoplasm [GO:0005654]; plasma membrane [GO:0005886]; T-tubule [GO:0030315]; Z disc [GO:0030018]; calcium ion binding [GO:0005509]; calmodulin binding [GO:0005516]; calmodulin-dependent protein phosphatase activity [GO:0033192]; drug binding [GO:0008144]; enzyme binding [GO:0019899]; protein dimerization activity [GO:0046983]; protein phos…	calcineurin complex [GO:0005955]; cytosol [GO:0005829]; nucleoplasm [GO:0005654]; plasma membrane [GO:0005886]; T-tubule [GO:0030315]; Z disc [GO:0030018]; calcium ion binding [GO:0005509]; calmodulin binding [GO:0005516]; calmodulin-dependent protein phosphatase activity [GO:0033192]; drug binding [GO:0008144]; enzyme binding [GO:0019899]; protein dimerization activity [GO:0046983]; protein phos…	calcineurin complex [GO:0005955]; cytosol [GO:0005829]; nucleoplasm [GO:0005654]; plasma membrane [GO:0005886]; T-tubule [GO:0030315]; Z disc [GO:0030018]; calcium ion binding [GO:0005509]; calmodulin binding [GO:0005516]; calmodulin-dependent protein phosphatase activity [GO:0033192]; drug binding [GO:0008144]; enzyme binding [GO:0019899]; protein dimerization activity [GO:0046983]; protein phos…	Calcium-dependent, calmodulin-stimulated protein phosphatase. This subunit may have a role in the calmodulin activation of calcineurin.	59024	59
TM205_HUMAN	-0.117943	0.0357779	TMEM205	TMEM205 UNQ501/PRO1018	Transmembrane protein 205	-2.25117	-2.23542	0.0356874	0.242014	0.238887	2.35568	20	0.0186794	0.0164695	0.0167024	189	extracellular exosome [GO:0070062]; integral component of membrane [GO:0016021]	extracellular exosome [GO:0070062]; integral component of membrane [GO:0016021]	extracellular exosome [GO:0070062]; integral component of membrane [GO:0016021]	In cancer cells, plays a role in resistance to the chemotherapeutic agent cisplatin. {ECO:0000269|PubMed:20589834}.	21198	21
RU1C_HUMAN	-0.118529	0.0287405	SNRPC	NA	NA	-2.45867	-2.28791	0.0367132	0.219853	0.242328	2.35568	13	0.0186794	0.00929621	0.0107357
ACTY_HUMAN	-0.119027	0.000816005	ACTR1B	ACTR1B CTRN2	Beta-centractin	-3.93655	-3.51611	0.0019128	0.110441	0.108611	2.35568	20	0.0186794	0.0054854	0.00687569	376	centrosome [GO:0005813]; cytoplasm [GO:0005737]; cytosol [GO:0005829]; dynactin complex [GO:0005869]; extracellular exosome [GO:0070062]; extracellular region [GO:0005576]; ficolin-1-rich granule lumen [GO:1904813]; membrane [GO:0016020]; microtubule cytoskeleton [GO:0015630]; secretory granule lumen [GO:0034774]; ATP binding [GO:0005524]; antigen processing and presentation of exogenous peptide …	centrosome [GO:0005813]; cytoplasm [GO:0005737]; cytosol [GO:0005829]; dynactin complex [GO:0005869]; extracellular exosome [GO:0070062]; extracellular region [GO:0005576]; ficolin-1-rich granule lumen [GO:1904813]; membrane [GO:0016020]; microtubule cytoskeleton [GO:0015630]; secretory granule lumen [GO:0034774]; ATP binding [GO:0005524]; antigen processing and presentation of exogenous peptide …	centrosome [GO:0005813]; cytoplasm [GO:0005737]; cytosol [GO:0005829]; dynactin complex [GO:0005869]; extracellular exosome [GO:0070062]; extracellular region [GO:0005576]; ficolin-1-rich granule lumen [GO:1904813]; membrane [GO:0016020]; microtubule cytoskeleton [GO:0015630]; secretory granule lumen [GO:0034774]; ATP binding [GO:0005524]; antigen processing and presentation of exogenous peptide …	Component of a multi-subunit complex involved in microtubule based vesicle motility. It is associated with the centrosome.	42293	42
MA2A2_HUMAN	-0.119265	0.0249999	MAN2A2	MAN2A2 MANA2X	Alpha-mannosidase 2x	-2.42312	-2.38752	0.0258308	0.207886	0.208864	2.35568	20	0.0186794	0.0145355	0.0149722	1150	Golgi membrane [GO:0000139]; integral component of membrane [GO:0016021]; alpha-mannosidase activity [GO:0004559]; carbohydrate binding [GO:0030246]; hydrolase activity, hydrolyzing N-glycosyl compounds [GO:0016799]; mannosyl-oligosaccharide 1,3-1,6-alpha-mannosidase activity [GO:0004572]; zinc ion binding [GO:0008270]; mannose metabolic process [GO:0006013]; N-glycan processing [GO:0006491]; pro…	Golgi membrane [GO:0000139]; integral component of membrane [GO:0016021]; alpha-mannosidase activity [GO:0004559]; carbohydrate binding [GO:0030246]; hydrolase activity, hydrolyzing N-glycosyl compounds [GO:0016799]; mannosyl-oligosaccharide 1,3-1,6-alpha-mannosidase activity [GO:0004572]; zinc ion binding [GO:0008270]; mannose metabolic process [GO:0006013]; N-glycan processing [GO:0006491]; pro…	Golgi membrane [GO:0000139]; integral component of membrane [GO:0016021]; alpha-mannosidase activity [GO:0004559]; carbohydrate binding [GO:0030246]; hydrolase activity, hydrolyzing N-glycosyl compounds [GO:0016799]; mannosyl-oligosaccharide 1,3-1,6-alpha-mannosidase activity [GO:0004572]; zinc ion binding [GO:0008270]; mannose metabolic process [GO:0006013]; N-glycan processing [GO:0006491]; pro…	Catalyzes the first committed step in the biosynthesis of complex N-glycans. It controls conversion of high mannose to complex N-glycans; the final hydrolytic step in the N-glycan maturation pathway.	130539	131
NUP88_HUMAN	-0.11974	0.00588012	NUP88	NUP88	Nuclear pore complex protein Nup88	-3.08198	-2.92271	0.00779976	0.135096	0.132983	2.35568	20	0.0186794	0.00905666	0.0100706	741	cytosol [GO:0005829]; nuclear pore [GO:0005643]; nucleoplasm [GO:0005654]; transporter activity [GO:0005215]; gene silencing by RNA [GO:0031047]; intracellular transport of virus [GO:0075733]; mitotic nuclear envelope disassembly [GO:0007077]; mRNA export from nucleus [GO:0006406]; protein export from nucleus [GO:0006611]; protein import into nucleus [GO:0006606]; protein sumoylation [GO:0016925]…	cytosol [GO:0005829]; nuclear pore [GO:0005643]; nucleoplasm [GO:0005654]; transporter activity [GO:0005215]; gene silencing by RNA [GO:0031047]; intracellular transport of virus [GO:0075733]; mitotic nuclear envelope disassembly [GO:0007077]; mRNA export from nucleus [GO:0006406]; protein export from nucleus [GO:0006611]; protein import into nucleus [GO:0006606]; protein sumoylation [GO:0016925]…	cytosol [GO:0005829]; nuclear pore [GO:0005643]; nucleoplasm [GO:0005654]; transporter activity [GO:0005215]; gene silencing by RNA [GO:0031047]; intracellular transport of virus [GO:0075733]; mitotic nuclear envelope disassembly [GO:0007077]; mRNA export from nucleus [GO:0006406]; protein export from nucleus [GO:0006611]; protein import into nucleus [GO:0006606]; protein sumoylation [GO:0016925]…	Essential component of nuclear pore complex.	83542	84
WDR82_HUMAN	-0.120123	0.00601539	WDR82	WDR82 TMEM113 WDR82A UNQ9342/PRO34047	WD repeat-containing protein 82	-3.07194	-2.91685	0.00790614	0.13556	0.132983	2.35568	20	0.0186794	0.00917447	0.010176	313	chromatin [GO:0000785]; histone methyltransferase complex [GO:0035097]; nucleolus [GO:0005730]; PTW/PP1 phosphatase complex [GO:0072357]; Set1C/COMPASS complex [GO:0048188]; chromatin binding [GO:0003682]; histone H3-K4 methylation [GO:0051568]; histone H3-K4 trimethylation [GO:0080182]	chromatin [GO:0000785]; histone methyltransferase complex [GO:0035097]; nucleolus [GO:0005730]; PTW/PP1 phosphatase complex [GO:0072357]; Set1C/COMPASS complex [GO:0048188]; chromatin binding [GO:0003682]; histone H3-K4 methylation [GO:0051568]; histone H3-K4 trimethylation [GO:0080182]	chromatin [GO:0000785]; histone methyltransferase complex [GO:0035097]; nucleolus [GO:0005730]; PTW/PP1 phosphatase complex [GO:0072357]; Set1C/COMPASS complex [GO:0048188]; chromatin binding [GO:0003682]; histone H3-K4 methylation [GO:0051568]; histone H3-K4 trimethylation [GO:0080182]	Regulatory component of the SET1 complex implicated in the tethering of this complex to transcriptional start sites of active genes. Facilitates histone H3 'Lys-4' methylation via recruitment of the SETD1A or SETD1B to the 'Ser-5' phosphorylated C-terminal domain (CTD) of RNA polymerase II large subunit (POLR2A). Component of PTW/PP1 phosphatase complex, which plays a role in the control of chrom…	35079	35
SF3B4_HUMAN	-0.120439	0.00846644	SF3B4	NA	NA	-2.92003	-2.80015	0.0103345	0.141794	0.148351	2.35568	20	0.0186794	0.0102073	0.0111
FKB15_HUMAN	-0.121147	0.0234712	FKBP15	FKBP15 KIAA0674	FK506-binding protein 15	-2.45293	-2.41798	0.0241873	0.202492	0.203929	2.35568	20	0.0186794	0.0146356	0.0150617	1219	actin filament [GO:0005884]; axon [GO:0030424]; early endosome [GO:0005769]; growth cone [GO:0030426]; membrane [GO:0016020]; actin binding [GO:0003779]; endocytosis [GO:0006897]; negative regulation of phosphatase activity [GO:0010923]	actin filament [GO:0005884]; axon [GO:0030424]; early endosome [GO:0005769]; growth cone [GO:0030426]; membrane [GO:0016020]; actin binding [GO:0003779]; endocytosis [GO:0006897]; negative regulation of phosphatase activity [GO:0010923]	actin filament [GO:0005884]; axon [GO:0030424]; early endosome [GO:0005769]; growth cone [GO:0030426]; membrane [GO:0016020]; actin binding [GO:0003779]; endocytosis [GO:0006897]; negative regulation of phosphatase activity [GO:0010923]	May be involved in the cytoskeletal organization of neuronal growth cones. Seems to be inactive as a PPIase (By similarity). Involved in the transport of early endosomes at the level of transition between microfilament-based and microtubule-based movement. {ECO:0000250, ECO:0000269|PubMed:19121306}.	133630	134
H10_HUMAN	-0.121209	0.00548333	H1F0	H1F0 H1FV	Histone H1.0	-3.1128	-2.95323	0.00726789	0.131969	0.132722	2.35568	20	0.0186794	0.0090974	0.0101071	194	actin cytoskeleton [GO:0015629]; Golgi apparatus [GO:0005794]; nuclear body [GO:0016604]; nuclear chromatin [GO:0000790]; nuclear euchromatin [GO:0005719]; nucleoplasm [GO:0005654]; nucleosome [GO:0000786]; nucleus [GO:0005634]; AT DNA binding [GO:0003680]; chromatin DNA binding [GO:0031490]; RNA binding [GO:0003723]; apoptotic DNA fragmentation [GO:0006309]; nucleosome assembly [GO:0006334]	actin cytoskeleton [GO:0015629]; Golgi apparatus [GO:0005794]; nuclear body [GO:0016604]; nuclear chromatin [GO:0000790]; nuclear euchromatin [GO:0005719]; nucleoplasm [GO:0005654]; nucleosome [GO:0000786]; nucleus [GO:0005634]; AT DNA binding [GO:0003680]; chromatin DNA binding [GO:0031490]; RNA binding [GO:0003723]; apoptotic DNA fragmentation [GO:0006309]; nucleosome assembly [GO:0006334]	actin cytoskeleton [GO:0015629]; Golgi apparatus [GO:0005794]; nuclear body [GO:0016604]; nuclear chromatin [GO:0000790]; nuclear euchromatin [GO:0005719]; nucleoplasm [GO:0005654]; nucleosome [GO:0000786]; nucleus [GO:0005634]; AT DNA binding [GO:0003680]; chromatin DNA binding [GO:0031490]; RNA binding [GO:0003723]; apoptotic DNA fragmentation [GO:0006309]; nucleosome assembly [GO:0006334]	Histones H1 are necessary for the condensation of nucleosome chains into higher-order structures. The H1F0 histones are found in cells that are in terminal stages of differentiation or that have low rates of cell division.	20863	21
NEO1_HUMAN	-0.121612	0.00615076	NEO1	NEO1 IGDCC2 NGN	Neogenin	-3.0621	-2.91614	0.007919	0.136468	0.132983	2.35568	20	0.0186794	0.00946387	0.0104349	1461	Golgi apparatus [GO:0005794]; integral component of plasma membrane [GO:0005887]; nucleoplasm [GO:0005654]; plasma membrane [GO:0005886]; plasma membrane protein complex [GO:0098797]; co-receptor binding [GO:0039706]; receptor activity [GO:0004872]; axon guidance [GO:0007411]; cell adhesion [GO:0007155]; iron ion homeostasis [GO:0055072]; positive regulation of BMP signaling pathway [GO:0030513]	Golgi apparatus [GO:0005794]; integral component of plasma membrane [GO:0005887]; nucleoplasm [GO:0005654]; plasma membrane [GO:0005886]; plasma membrane protein complex [GO:0098797]; co-receptor binding [GO:0039706]; receptor activity [GO:0004872]; axon guidance [GO:0007411]; cell adhesion [GO:0007155]; iron ion homeostasis [GO:0055072]; positive regulation of BMP signaling pathway [GO:0030513]	Golgi apparatus [GO:0005794]; integral component of plasma membrane [GO:0005887]; nucleoplasm [GO:0005654]; plasma membrane [GO:0005886]; plasma membrane protein complex [GO:0098797]; co-receptor binding [GO:0039706]; receptor activity [GO:0004872]; axon guidance [GO:0007411]; cell adhesion [GO:0007155]; iron ion homeostasis [GO:0055072]; positive regulation of BMP signaling pathway [GO:0030513]	Multi-functional cell surface receptor regulating cell adhesion in many diverse developmental processes, including neural tube and mammary gland formation, myogenesis and angiogenesis. Receptor for members of the BMP, netrin, and repulsive guidance molecule (RGM) families. Netrin-Neogenin interactions result in a chemoattractive axon guidance response and cell-cell adhesion, the interaction betwe…	160017	160
NAR3_HUMAN	-0.122031	0.0163943	ART3	ART3 TMART	Ecto-ADP-ribosyltransferase 3	-2.62019	-2.56209	0.0176453	0.175569	0.178539	2.35568	20	0.0186794	0.0130145	0.0136114	389	anchored component of membrane [GO:0031225]; extracellular exosome [GO:0070062]; extracellular region [GO:0005576]; integral component of plasma membrane [GO:0005887]; plasma membrane [GO:0005886]; NAD(P)+-protein-arginine ADP-ribosyltransferase activity [GO:0003956]; NAD+ ADP-ribosyltransferase activity [GO:0003950]; C-terminal protein lipidation [GO:0006501]; protein ADP-ribosylation [GO:000647…	anchored component of membrane [GO:0031225]; extracellular exosome [GO:0070062]; extracellular region [GO:0005576]; integral component of plasma membrane [GO:0005887]; plasma membrane [GO:0005886]; NAD(P)+-protein-arginine ADP-ribosyltransferase activity [GO:0003956]; NAD+ ADP-ribosyltransferase activity [GO:0003950]; C-terminal protein lipidation [GO:0006501]; protein ADP-ribosylation [GO:000647…	anchored component of membrane [GO:0031225]; extracellular exosome [GO:0070062]; extracellular region [GO:0005576]; integral component of plasma membrane [GO:0005887]; plasma membrane [GO:0005886]; NAD(P)+-protein-arginine ADP-ribosyltransferase activity [GO:0003956]; NAD+ ADP-ribosyltransferase activity [GO:0003950]; C-terminal protein lipidation [GO:0006501]; protein ADP-ribosylation [GO:000647…		43923	44
NUP54_HUMAN	-0.123069	0.00275979	NUP54	NUP54	Nucleoporin p54	-3.41263	-3.18663	0.00420662	0.117724	0.115884	2.35568	20	0.0186794	0.0078032	0.00894925	507	nuclear envelope [GO:0005635]; nuclear membrane [GO:0031965]; nuclear pore central transport channel [GO:0044613]; nucleocytoplasmic transporter activity [GO:0005487]; structural constituent of nuclear pore [GO:0017056]; gene silencing by RNA [GO:0031047]; intracellular transport of virus [GO:0075733]; mitotic nuclear envelope disassembly [GO:0007077]; mRNA export from nucleus [GO:0006406]; NLS-b…	nuclear envelope [GO:0005635]; nuclear membrane [GO:0031965]; nuclear pore central transport channel [GO:0044613]; nucleocytoplasmic transporter activity [GO:0005487]; structural constituent of nuclear pore [GO:0017056]; gene silencing by RNA [GO:0031047]; intracellular transport of virus [GO:0075733]; mitotic nuclear envelope disassembly [GO:0007077]; mRNA export from nucleus [GO:0006406]; NLS-b…	nuclear envelope [GO:0005635]; nuclear membrane [GO:0031965]; nuclear pore central transport channel [GO:0044613]; nucleocytoplasmic transporter activity [GO:0005487]; structural constituent of nuclear pore [GO:0017056]; gene silencing by RNA [GO:0031047]; intracellular transport of virus [GO:0075733]; mitotic nuclear envelope disassembly [GO:0007077]; mRNA export from nucleus [GO:0006406]; NLS-b…	Component of the nuclear pore complex, a complex required for the trafficking across the nuclear membrane. {ECO:0000250|UniProtKB:P70582}.	55435	55
F118B_HUMAN	-0.12401	0.0289398	FAM118B	FAM118B	Protein FAM118B	-2.35348	-2.33858	0.0286891	0.220347	0.219124	2.35568	20	0.0186794	0.0166589	0.0168718	351	Cajal body [GO:0015030]; Cajal body organization [GO:0030576]	Cajal body [GO:0015030]; Cajal body organization [GO:0030576]	Cajal body [GO:0015030]; Cajal body organization [GO:0030576]	May play a role in Cajal bodies formation. {ECO:0000269|PubMed:24569877}.	39499	39
PKHA1_HUMAN	-0.125412	0.0402599	PLEKHA1	NA	NA	-2.27811	-2.18909	0.044426	0.256044	0.265062	2.35568	13	0.0186794	0.0121225	0.0131284
PCBP4_HUMAN	-0.126334	0.0125101	PCBP4	PCBP4	Poly	-2.74401	-2.67865	0.0136068	0.159493	0.160377	2.35568	20	0.0186794	0.012718	0.0133462	403	cytosol [GO:0005829]; intracellular ribonucleoprotein complex [GO:0030529]; DNA binding [GO:0003677]; mRNA 3'-UTR binding [GO:0003730]; RNA binding [GO:0003723]; DNA damage response, signal transduction by p53 class mediator resulting in cell cycle arrest [GO:0006977]; regulation of mRNA stability [GO:0043488]	cytosol [GO:0005829]; intracellular ribonucleoprotein complex [GO:0030529]; DNA binding [GO:0003677]; mRNA 3'-UTR binding [GO:0003730]; RNA binding [GO:0003723]; DNA damage response, signal transduction by p53 class mediator resulting in cell cycle arrest [GO:0006977]; regulation of mRNA stability [GO:0043488]	cytosol [GO:0005829]; intracellular ribonucleoprotein complex [GO:0030529]; DNA binding [GO:0003677]; mRNA 3'-UTR binding [GO:0003730]; RNA binding [GO:0003723]; DNA damage response, signal transduction by p53 class mediator resulting in cell cycle arrest [GO:0006977]; regulation of mRNA stability [GO:0043488]	Single-stranded nucleic acid binding protein that binds preferentially to oligo dC. {ECO:0000250}.	41482	41
VP37C_HUMAN	-0.12668	0.03354	VPS37C	VPS37C PML39	Vacuolar protein sorting-associated protein 37C	-2.28251	-2.28122	0.0324074	0.235449	0.230538	2.35568	20	0.0186794	0.0184819	0.0185027	355	endosome membrane [GO:0010008]; ESCRT I complex [GO:0000813]; extracellular exosome [GO:0070062]; late endosome membrane [GO:0031902]; calcium-dependent protein binding [GO:0048306]; protein dimerization activity [GO:0046983]; endosomal transport [GO:0016197]; intracellular transport of virus [GO:0075733]; macroautophagy [GO:0016236]; multivesicular body assembly [GO:0036258]; protein transport […	endosome membrane [GO:0010008]; ESCRT I complex [GO:0000813]; extracellular exosome [GO:0070062]; late endosome membrane [GO:0031902]; calcium-dependent protein binding [GO:0048306]; protein dimerization activity [GO:0046983]; endosomal transport [GO:0016197]; intracellular transport of virus [GO:0075733]; macroautophagy [GO:0016236]; multivesicular body assembly [GO:0036258]; protein transport […	endosome membrane [GO:0010008]; ESCRT I complex [GO:0000813]; extracellular exosome [GO:0070062]; late endosome membrane [GO:0031902]; calcium-dependent protein binding [GO:0048306]; protein dimerization activity [GO:0046983]; endosomal transport [GO:0016197]; intracellular transport of virus [GO:0075733]; macroautophagy [GO:0016236]; multivesicular body assembly [GO:0036258]; protein transport […	Component of the ESCRT-I complex, a regulator of vesicular trafficking process. Required for the sorting of endocytic ubiquitinated cargos into multivesicular bodies. May be involved in cell growth and differentiation. {ECO:0000269|PubMed:15509564}.	38659	39
DCPS_HUMAN	-0.127003	0.0312971	DCPS	DCPS DCS1 HINT5 HSPC015	m7GpppX diphosphatase	-2.31591	-2.31162	0.0303851	0.228832	0.224453	2.35568	20	0.0186794	0.0180442	0.0181111	337	cytoplasm [GO:0005737]; cytosol [GO:0005829]; mitochondrion [GO:0005739]; nucleoplasm [GO:0005654]; nucleus [GO:0005634]; P-body [GO:0000932]; exoribonuclease activity [GO:0004532]; m7G(5')pppN diphosphatase activity [GO:0050072]; RNA 7-methylguanosine cap binding [GO:0000340]; cellular response to menadione [GO:0036245]; deadenylation-dependent decapping of nuclear-transcribed mRNA [GO:0000290];…	cytoplasm [GO:0005737]; cytosol [GO:0005829]; mitochondrion [GO:0005739]; nucleoplasm [GO:0005654]; nucleus [GO:0005634]; P-body [GO:0000932]; exoribonuclease activity [GO:0004532]; m7G(5')pppN diphosphatase activity [GO:0050072]; RNA 7-methylguanosine cap binding [GO:0000340]; cellular response to menadione [GO:0036245]; deadenylation-dependent decapping of nuclear-transcribed mRNA [GO:0000290];…	cytoplasm [GO:0005737]; cytosol [GO:0005829]; mitochondrion [GO:0005739]; nucleoplasm [GO:0005654]; nucleus [GO:0005634]; P-body [GO:0000932]; exoribonuclease activity [GO:0004532]; m7G(5')pppN diphosphatase activity [GO:0050072]; RNA 7-methylguanosine cap binding [GO:0000340]; cellular response to menadione [GO:0036245]; deadenylation-dependent decapping of nuclear-transcribed mRNA [GO:0000290];…	Decapping scavenger enzyme that catalyzes the cleavage of a residual cap structure following the degradation of mRNAs by the 3'->5' exosome-mediated mRNA decay pathway. Hydrolyzes cap analog structures like 7-methylguanosine nucleoside triphosphate (m7GpppG) with up to 10 nucleotide substrates (small capped oligoribonucleotides) and specifically releases 5'-phosphorylated RNA fragments and 7-meth…	38609	39
ASH2L_HUMAN	-0.127363	0.0191622	ASH2L	ASH2L ASH2L1	Set1/Ash2 histone methyltransferase complex subunit ASH2	-2.54792	-2.51553	0.0195525	0.183709	0.185823	2.35568	20	0.0186794	0.0149923	0.0153809	628	histone methyltransferase complex [GO:0035097]; MLL1 complex [GO:0071339]; MLL3/4 complex [GO:0044666]; nuclear euchromatin [GO:0005719]; nucleoplasm [GO:0005654]; nucleus [GO:0005634]; Set1C/COMPASS complex [GO:0048188]	beta-catenin binding [GO:0008013]; DNA binding [GO:0003677]; euchromatin binding [GO:1990188]; histone-lysine N-methyltransferase activity [GO:0018024]; metal ion binding [GO:0046872]; transcription regulatory region DNA binding [GO:0044212]	beta-catenin-TCF complex assembly [GO:1904837]; cellular response to DNA damage stimulus [GO:0006974]; hemopoiesis [GO:0030097]; histone H3-K4 methylation [GO:0051568]; positive regulation of cell proliferation [GO:0008284]; positive regulation of transcription from RNA polymerase II promoter [GO:0045944]; regulation of megakaryocyte differentiation [GO:0045652]; regulation of transcription, DNA-…	Component of the Set1/Ash2 histone methyltransferase (HMT) complex, a complex that specifically methylates 'Lys-4' of histone H3, but not if the neighboring 'Lys-9' residue is already methylated. As part of the MLL1/MLL complex it is involved in methylation and dimethylation at 'Lys-4' of histone H3. May function as a transcriptional regulator. May play a role in hematopoiesis. {ECO:0000269|PubMe…	68723	69
COBL_HUMAN	-0.128119	0.0329255	COBL	COBL KIAA0633	Protein cordon-bleu	-2.29145	-2.29195	0.0316804	0.234145	0.228863	2.35568	20	0.0186794	0.0187566	0.0187485	1261	actin filament [GO:0005884]; axon [GO:0030424]; axonal growth cone [GO:0044295]; cell cortex [GO:0005938]; dendrite [GO:0030425]; dendritic growth cone [GO:0044294]; neuronal cell body [GO:0043025]; perinuclear region of cytoplasm [GO:0048471]; plasma membrane [GO:0005886]; ruffle [GO:0001726]; actin monomer binding [GO:0003785]; actin filament network formation [GO:0051639]; actin filament polym…	actin filament [GO:0005884]; axon [GO:0030424]; axonal growth cone [GO:0044295]; cell cortex [GO:0005938]; dendrite [GO:0030425]; dendritic growth cone [GO:0044294]; neuronal cell body [GO:0043025]; perinuclear region of cytoplasm [GO:0048471]; plasma membrane [GO:0005886]; ruffle [GO:0001726]; actin monomer binding [GO:0003785]; actin filament network formation [GO:0051639]; actin filament polym…	actin filament [GO:0005884]; axon [GO:0030424]; axonal growth cone [GO:0044295]; cell cortex [GO:0005938]; dendrite [GO:0030425]; dendritic growth cone [GO:0044294]; neuronal cell body [GO:0043025]; perinuclear region of cytoplasm [GO:0048471]; plasma membrane [GO:0005886]; ruffle [GO:0001726]; actin monomer binding [GO:0003785]; actin filament network formation [GO:0051639]; actin filament polym…	Plays an important role in the reorganization of the actin cytoskeleton. Regulates neuron morphogenesis and increases branching of axons and dendrites. Regulates dendrite branching in Purkinje cells (By similarity). Binds to and sequesters actin monomers (G actin). Nucleates actin polymerization by assembling three actin monomers in cross-filament orientation and thereby promotes growth of actin …	135617	136
IPO13_HUMAN	-0.129132	0.00944491	IPO13	IPO13 KIAA0724 RANBP13	Importin-13	-2.87102	-2.79282	0.0105087	0.143709	0.149072	2.35568	20	0.0186794	0.0121379	0.0128272	963	cytoplasm [GO:0005737]; nuclear membrane [GO:0031965]; nuclear localization sequence binding [GO:0008139]; protein transporter activity [GO:0008565]; Ran GTPase binding [GO:0008536]; protein import into nucleus [GO:0006606]	cytoplasm [GO:0005737]; nuclear membrane [GO:0031965]; nuclear localization sequence binding [GO:0008139]; protein transporter activity [GO:0008565]; Ran GTPase binding [GO:0008536]; protein import into nucleus [GO:0006606]	cytoplasm [GO:0005737]; nuclear membrane [GO:0031965]; nuclear localization sequence binding [GO:0008139]; protein transporter activity [GO:0008565]; Ran GTPase binding [GO:0008536]; protein import into nucleus [GO:0006606]	Functions in nuclear protein import as nuclear transport receptor. Serves as receptor for nuclear localization signals (NLS) in cargo substrates. Is thought to mediate docking of the importin/substrate complex to the nuclear pore complex (NPC) through binding to nucleoporin and the complex is subsequently translocated through the pore by an energy requiring, Ran-dependent mechanism. At the nucleo…	108195	108
SRBS1_HUMAN	-0.129156	0.00780827	SORBS1	SORBS1 KIAA0894 KIAA1296 SH3D5	Sorbin and SH3 domain-containing protein 1	-2.95617	-2.86254	0.00895941	0.139802	0.140342	2.35568	20	0.0186794	0.0114531	0.0122145	1292	cell-cell adherens junction [GO:0005913]; cell-substrate adherens junction [GO:0005924]; centrosome [GO:0005813]; cytosol [GO:0005829]; focal adhesion [GO:0005925]; membrane raft [GO:0045121]; nuclear matrix [GO:0016363]; nucleus [GO:0005634]; plasma membrane [GO:0005886]; stress fiber [GO:0001725]; zonula adherens [GO:0005915]; actin binding [GO:0003779]; cytoskeletal protein binding [GO:0008092…	cell-cell adherens junction [GO:0005913]; cell-substrate adherens junction [GO:0005924]; centrosome [GO:0005813]; cytosol [GO:0005829]; focal adhesion [GO:0005925]; membrane raft [GO:0045121]; nuclear matrix [GO:0016363]; nucleus [GO:0005634]; plasma membrane [GO:0005886]; stress fiber [GO:0001725]; zonula adherens [GO:0005915]; actin binding [GO:0003779]; cytoskeletal protein binding [GO:0008092…	cell-cell adherens junction [GO:0005913]; cell-substrate adherens junction [GO:0005924]; centrosome [GO:0005813]; cytosol [GO:0005829]; focal adhesion [GO:0005925]; membrane raft [GO:0045121]; nuclear matrix [GO:0016363]; nucleus [GO:0005634]; plasma membrane [GO:0005886]; stress fiber [GO:0001725]; zonula adherens [GO:0005915]; actin binding [GO:0003779]; cytoskeletal protein binding [GO:0008092…	Plays a role in tyrosine phosphorylation of CBL by linking CBL to the insulin receptor. Required for insulin-stimulated glucose transport. Involved in formation of actin stress fibers and focal adhesions (By similarity). {ECO:0000250|UniProtKB:Q62417}.	142513	143
DUS28_HUMAN	-0.129721	0.0178222	DUSP28	DUSP28	Dual specificity phosphatase 28	-2.58158	-2.55046	0.0181046	0.180226	0.180167	2.35568	20	0.0186794	0.0151494	0.0155214	176	phosphatase activity [GO:0016791]; protein tyrosine phosphatase activity [GO:0004725]; protein tyrosine/serine/threonine phosphatase activity [GO:0008138]; dephosphorylation [GO:0016311]; peptidyl-tyrosine dephosphorylation [GO:0035335]	phosphatase activity [GO:0016791]; protein tyrosine phosphatase activity [GO:0004725]; protein tyrosine/serine/threonine phosphatase activity [GO:0008138]; dephosphorylation [GO:0016311]; peptidyl-tyrosine dephosphorylation [GO:0035335]	phosphatase activity [GO:0016791]; protein tyrosine phosphatase activity [GO:0004725]; protein tyrosine/serine/threonine phosphatase activity [GO:0008138]; dephosphorylation [GO:0016311]; peptidyl-tyrosine dephosphorylation [GO:0035335]	Has phosphatase activity with the synthetic substrate 6,8-difluoro-4-methylumbelliferyl phosphate (in vitro). {ECO:0000269|PubMed:24531476}.	18324	18
WDR13_HUMAN	-0.130469	0.0269436	WDR13	WDR13	WD repeat-containing protein 13	-2.38758	-2.38224	0.0261262	0.214473	0.209561	2.35568	20	0.0186794	0.0179164	0.0179968	485	microtubule organizing center [GO:0005815]; nucleoplasm [GO:0005654]; plasma membrane [GO:0005886]; promoter-specific chromatin binding [GO:1990841]; negative regulation of type B pancreatic cell proliferation [GO:1904691]	microtubule organizing center [GO:0005815]; nucleoplasm [GO:0005654]; plasma membrane [GO:0005886]; promoter-specific chromatin binding [GO:1990841]; negative regulation of type B pancreatic cell proliferation [GO:1904691]	microtubule organizing center [GO:0005815]; nucleoplasm [GO:0005654]; plasma membrane [GO:0005886]; promoter-specific chromatin binding [GO:1990841]; negative regulation of type B pancreatic cell proliferation [GO:1904691]		53696	54
CTL2_HUMAN	-0.1306	0.0187756	SLC44A2	SLC44A2 CTL2 PSEC0210	Choline transporter-like protein 2	-2.5574	-2.53168	0.0188702	0.183551	0.183234	2.35568	20	0.0186794	0.0156475	0.015967	706	extracellular exosome [GO:0070062]; integral component of membrane [GO:0016021]; lysosomal membrane [GO:0005765]; plasma membrane [GO:0005886]; specific granule membrane [GO:0035579]; choline transmembrane transporter activity [GO:0015220]; signal transducer activity [GO:0004871]; choline transport [GO:0015871]; neutrophil degranulation [GO:0043312]; phosphatidylcholine biosynthetic process [GO:0…	extracellular exosome [GO:0070062]; integral component of membrane [GO:0016021]; lysosomal membrane [GO:0005765]; plasma membrane [GO:0005886]; specific granule membrane [GO:0035579]; choline transmembrane transporter activity [GO:0015220]; signal transducer activity [GO:0004871]; choline transport [GO:0015871]; neutrophil degranulation [GO:0043312]; phosphatidylcholine biosynthetic process [GO:0…	extracellular exosome [GO:0070062]; integral component of membrane [GO:0016021]; lysosomal membrane [GO:0005765]; plasma membrane [GO:0005886]; specific granule membrane [GO:0035579]; choline transmembrane transporter activity [GO:0015220]; signal transducer activity [GO:0004871]; choline transport [GO:0015871]; neutrophil degranulation [GO:0043312]; phosphatidylcholine biosynthetic process [GO:0…	Isoform 1, but not isoform 3, exhibits some choline transporter activity. {ECO:0000269|PubMed:10677542, ECO:0000269|PubMed:20665236}.	80124	80
MTL26_HUMAN	-0.131114	0.00243592	METTL26	NA	NA	-3.46667	-3.26992	0.00345225	0.112743	0.113342	2.35568	20	0.0186794	0.00858267	0.00964659
ARVC_HUMAN	-0.132299	0.0343898	ARVCF	ARVCF	Armadillo repeat protein deleted in velo-cardio-facial syndrome	-2.27039	-2.2804	0.0324638	0.238173	0.230538	2.35568	20	0.0186794	0.0203735	0.020195	962	cytoplasm [GO:0005737]; intracellular [GO:0005622]; nucleus [GO:0005634]; plasma membrane [GO:0005886]; calcium-dependent cell-cell adhesion via plasma membrane cell adhesion molecules [GO:0016339]; cell adhesion [GO:0007155]; multicellular organism development [GO:0007275]; single organismal cell-cell adhesion [GO:0016337]	cytoplasm [GO:0005737]; intracellular [GO:0005622]; nucleus [GO:0005634]; plasma membrane [GO:0005886]; calcium-dependent cell-cell adhesion via plasma membrane cell adhesion molecules [GO:0016339]; cell adhesion [GO:0007155]; multicellular organism development [GO:0007275]; single organismal cell-cell adhesion [GO:0016337]	cytoplasm [GO:0005737]; intracellular [GO:0005622]; nucleus [GO:0005634]; plasma membrane [GO:0005886]; calcium-dependent cell-cell adhesion via plasma membrane cell adhesion molecules [GO:0016339]; cell adhesion [GO:0007155]; multicellular organism development [GO:0007275]; single organismal cell-cell adhesion [GO:0016337]	Involved in protein-protein interactions at adherens junctions.	104642	105
PRDX1_HUMAN	-0.13374	0.00880998	PRDX1	NA	NA	-2.90223	-2.83349	0.00957655	0.142242	0.144781	2.35568	20	0.0186794	0.0127411	0.0133668
PKHM2_HUMAN	-0.13383	0.0487629	PLEKHM2	NA	NA	-2.09851	-2.12493	0.0448788	0.276972	0.265169	2.35568	20	0.0186794	0.0244025	0.0237994
SREK1_HUMAN	-0.135136	0.0282225	SREK1	SREK1 SFRS12 SRRP86	Splicing regulatory glutamine/lysine-rich protein 1	-2.36547	-2.37124	0.0267513	0.216883	0.212636	2.35568	20	0.0186794	0.019582	0.0194869	508	nuclear speck [GO:0016607]; nucleoplasm [GO:0005654]; spliceosomal complex [GO:0005681]; RNA binding [GO:0003723]; mRNA processing [GO:0006397]; regulation of alternative mRNA splicing, via spliceosome [GO:0000381]; RNA splicing [GO:0008380]	nuclear speck [GO:0016607]; nucleoplasm [GO:0005654]; spliceosomal complex [GO:0005681]; RNA binding [GO:0003723]; mRNA processing [GO:0006397]; regulation of alternative mRNA splicing, via spliceosome [GO:0000381]; RNA splicing [GO:0008380]	nuclear speck [GO:0016607]; nucleoplasm [GO:0005654]; spliceosomal complex [GO:0005681]; RNA binding [GO:0003723]; mRNA processing [GO:0006397]; regulation of alternative mRNA splicing, via spliceosome [GO:0000381]; RNA splicing [GO:0008380]	Participates in the regulation of alternative splicing by modulating the activity of other splice facors. Inhibits the splicing activity of SFRS1, SFRS2 and SFRS6. Augments the splicing activity of SFRS3 (By similarity). {ECO:0000250}.	59380	59
SH3G1_HUMAN	-0.135484	0.0187916	SH3GL1	SH3GL1 CNSA1 SH3D2B	Endophilin-A2	-2.557	-2.54245	0.0184275	0.183551	0.181963	2.35568	20	0.0186794	0.0168447	0.0170381	368	cell junction [GO:0030054]; cell projection [GO:0042995]; cytoplasm [GO:0005737]; early endosome membrane [GO:0031901]; podosome [GO:0002102]; synapse [GO:0045202]; cadherin binding [GO:0045296]; GTPase binding [GO:0051020]; identical protein binding [GO:0042802]; lipid binding [GO:0008289]; phosphatase binding [GO:0019902]; central nervous system development [GO:0007417]; signal transduction [GO…	cell junction [GO:0030054]; cell projection [GO:0042995]; cytoplasm [GO:0005737]; early endosome membrane [GO:0031901]; podosome [GO:0002102]; synapse [GO:0045202]; cadherin binding [GO:0045296]; GTPase binding [GO:0051020]; identical protein binding [GO:0042802]; lipid binding [GO:0008289]; phosphatase binding [GO:0019902]; central nervous system development [GO:0007417]; signal transduction [GO…	cell junction [GO:0030054]; cell projection [GO:0042995]; cytoplasm [GO:0005737]; early endosome membrane [GO:0031901]; podosome [GO:0002102]; synapse [GO:0045202]; cadherin binding [GO:0045296]; GTPase binding [GO:0051020]; identical protein binding [GO:0042802]; lipid binding [GO:0008289]; phosphatase binding [GO:0019902]; central nervous system development [GO:0007417]; signal transduction [GO…	Implicated in endocytosis. May recruit other proteins to membranes with high curvature (By similarity). {ECO:0000250}.	41490	41
STAC3_HUMAN	-0.136418	0.0118629	STAC3	STAC3	SH3 and cysteine-rich domain-containing protein 3	-2.76814	-2.72792	0.0121765	0.157076	0.155949	2.35568	20	0.0186794	0.014572	0.0150048	364	cytosol [GO:0005829]; nucleoplasm [GO:0005654]; identical protein binding [GO:0042802]; metal ion binding [GO:0046872]; intracellular signal transduction [GO:0035556]; neuromuscular synaptic transmission [GO:0007274]; skeletal muscle contraction [GO:0003009]; skeletal muscle fiber development [GO:0048741]	cytosol [GO:0005829]; nucleoplasm [GO:0005654]; identical protein binding [GO:0042802]; metal ion binding [GO:0046872]; intracellular signal transduction [GO:0035556]; neuromuscular synaptic transmission [GO:0007274]; skeletal muscle contraction [GO:0003009]; skeletal muscle fiber development [GO:0048741]	cytosol [GO:0005829]; nucleoplasm [GO:0005654]; identical protein binding [GO:0042802]; metal ion binding [GO:0046872]; intracellular signal transduction [GO:0035556]; neuromuscular synaptic transmission [GO:0007274]; skeletal muscle contraction [GO:0003009]; skeletal muscle fiber development [GO:0048741]	In skeletal muscles contraction, may play a role in neuromuscular synaptic transmission. {ECO:0000269|PubMed:23736855}.	41507	42
LHPP_HUMAN	-0.136899	0.0370259	LHPP	LHPP	Phospholysine phosphohistidine inorganic pyrophosphate phosphatase	-2.23447	-2.25483	0.0342623	0.24701	0.233654	2.35568	20	0.0186794	0.0225217	0.0221168	270	cytosol [GO:0005829]; nuclear speck [GO:0016607]; nucleus [GO:0005634]; inorganic diphosphatase activity [GO:0004427]; magnesium ion binding [GO:0000287]; phosphatase activity [GO:0016791]; phosphohistidine phosphatase activity [GO:0008969]; protein homodimerization activity [GO:0042803]; dephosphorylation [GO:0016311]; phosphate-containing compound metabolic process [GO:0006796]; protein dephosp…	cytosol [GO:0005829]; nuclear speck [GO:0016607]; nucleus [GO:0005634]; inorganic diphosphatase activity [GO:0004427]; magnesium ion binding [GO:0000287]; phosphatase activity [GO:0016791]; phosphohistidine phosphatase activity [GO:0008969]; protein homodimerization activity [GO:0042803]; dephosphorylation [GO:0016311]; phosphate-containing compound metabolic process [GO:0006796]; protein dephosp…	cytosol [GO:0005829]; nuclear speck [GO:0016607]; nucleus [GO:0005634]; inorganic diphosphatase activity [GO:0004427]; magnesium ion binding [GO:0000287]; phosphatase activity [GO:0016791]; phosphohistidine phosphatase activity [GO:0008969]; protein homodimerization activity [GO:0042803]; dephosphorylation [GO:0016311]; phosphate-containing compound metabolic process [GO:0006796]; protein dephosp…	Phosphatase that hydrolyzes imidodiphosphate, 3-phosphohistidine and 6-phospholysine. Has broad substrate specificity and can also hydrolyze inorganic diphosphate, but with lower efficiency (By similarity). {ECO:0000250}.	29165	29
PR40A_HUMAN	-0.137544	0.0118913	PRPF40A	PRPF40A FBP11 FLAF1 FNBP3 HIP10 HYPA HSPC225	Pre-mRNA-processing factor 40 homolog A	-2.76706	-2.72991	0.0121218	0.157076	0.155949	2.35568	20	0.0186794	0.014825	0.0152312	957	cytosol [GO:0005829]; membrane [GO:0016020]; nuclear matrix [GO:0016363]; nuclear speck [GO:0016607]; nucleoplasm [GO:0005654]; U1 snRNP [GO:0005685]; U2-type prespliceosome [GO:0071004]; proline-rich region binding [GO:0070064]; RNA binding [GO:0003723]; cell cycle [GO:0007049]; cell division [GO:0051301]; cell migration [GO:0016477]; cytoskeleton organization [GO:0007010]; mRNA splicing, via sp…	cytosol [GO:0005829]; membrane [GO:0016020]; nuclear matrix [GO:0016363]; nuclear speck [GO:0016607]; nucleoplasm [GO:0005654]; U1 snRNP [GO:0005685]; U2-type prespliceosome [GO:0071004]; proline-rich region binding [GO:0070064]; RNA binding [GO:0003723]; cell cycle [GO:0007049]; cell division [GO:0051301]; cell migration [GO:0016477]; cytoskeleton organization [GO:0007010]; mRNA splicing, via sp…	cytosol [GO:0005829]; membrane [GO:0016020]; nuclear matrix [GO:0016363]; nuclear speck [GO:0016607]; nucleoplasm [GO:0005654]; U1 snRNP [GO:0005685]; U2-type prespliceosome [GO:0071004]; proline-rich region binding [GO:0070064]; RNA binding [GO:0003723]; cell cycle [GO:0007049]; cell division [GO:0051301]; cell migration [GO:0016477]; cytoskeleton organization [GO:0007010]; mRNA splicing, via sp…	Binds to WASL/N-WASP and suppresses its translocation from the nucleus to the cytoplasm, thereby inhibiting its cytoplasmic function (By similarity). Plays a role in the regulation of cell morphology and cytoskeletal organization. Required in the control of cell shape and migration. May play a role in cytokinesis. May be involved in pre-mRNA splicing. {ECO:0000250, ECO:0000269|PubMed:21834987}.	108805	109
HNRLL_HUMAN	-0.138302	0.00688628	HNRNPLL	HNRNPLL HNRPLL SRRF BLOCK24	Heterogeneous nuclear ribonucleoprotein L-like	-3.01206	-2.93915	0.00750872	0.138863	0.132753	2.35568	20	0.0186794	0.0126498	0.0132851	542	intracellular ribonucleoprotein complex [GO:0030529]; membrane [GO:0016020]; nucleus [GO:0005634]; mRNA binding [GO:0003729]; RNA binding [GO:0003723]; mRNA processing [GO:0006397]; positive regulation of RNA splicing [GO:0033120]	intracellular ribonucleoprotein complex [GO:0030529]; membrane [GO:0016020]; nucleus [GO:0005634]; mRNA binding [GO:0003729]; RNA binding [GO:0003723]; mRNA processing [GO:0006397]; positive regulation of RNA splicing [GO:0033120]	intracellular ribonucleoprotein complex [GO:0030529]; membrane [GO:0016020]; nucleus [GO:0005634]; mRNA binding [GO:0003729]; RNA binding [GO:0003723]; mRNA processing [GO:0006397]; positive regulation of RNA splicing [GO:0033120]	RNA-binding protein that functions as regulator of alternative splicing for multiple target mRNAs, including PTPRC/CD45 and STAT5A. Required for alternative splicing of PTPRC. {ECO:0000269|PubMed:18669861}.	60083	60
RHOQ_HUMAN	-0.138586	0.0474635	RHOQ	NA	NA	-2.112	-2.14351	0.0431975	0.272684	0.26156	2.35568	20	0.0186794	0.0258346	0.0250807
SRSF4_HUMAN	-0.139226	0.000249528	SRSF4	SRSF4 SFRS4 SRP75	Serine/arginine-rich splicing factor 4	-4.44356	-4.0086	0.0005758	0.0978309	0.0988917	2.35568	20	0.0186794	0.00589022	0.00723785	494	nuclear speck [GO:0016607]; nucleoplasm [GO:0005654]; nucleus [GO:0005634]	RNA binding [GO:0003723]; sequence-specific mRNA binding [GO:1990825]	mRNA 3'-end processing [GO:0031124]; mRNA export from nucleus [GO:0006406]; mRNA processing [GO:0006397]; mRNA splicing, via spliceosome [GO:0000398]; negative regulation of mRNA splicing, via spliceosome [GO:0048025]; response to insulin [GO:0032868]; RNA export from nucleus [GO:0006405]; RNA splicing [GO:0008380]; RNA splicing, via transesterification reactions [GO:0000375]; termination of RNA …	Plays a role in alternative splice site selection during pre-mRNA splicing. Represses the splicing of MAPT/Tau exon 10. {ECO:0000269|PubMed:15009664}.	56678	57
SYNRG_HUMAN	-0.140611	0.0428917	SYNRG	SYNRG AP1GBP1 SYNG	Synergin gamma	-2.56029	-2.02977	0.0753808	0.262308	0.324446	2.35568	6	0.0186794	0.0060324	0.00959791	1314	AP-1 adaptor complex [GO:0030121]; cytoplasm [GO:0005737]; Golgi apparatus [GO:0005794]; endocytosis [GO:0006897]; intracellular protein transport [GO:0006886]	AP-1 adaptor complex [GO:0030121]; cytoplasm [GO:0005737]; Golgi apparatus [GO:0005794]; endocytosis [GO:0006897]; intracellular protein transport [GO:0006886]	AP-1 adaptor complex [GO:0030121]; cytoplasm [GO:0005737]; Golgi apparatus [GO:0005794]; endocytosis [GO:0006897]; intracellular protein transport [GO:0006886]	May play a role in endocytosis and/or membrane trafficking at the trans-Golgi network (TGN). May act by linking the adapter protein complex AP-1 to other proteins.	140654	141
PDLI3_HUMAN	-0.142368	0.0192816	PDLIM3	PDLIM3 ALP	PDZ and LIM domain protein 3	-2.54503	-2.54571	0.0182955	0.183709	0.181031	2.35568	20	0.0186794	0.0187756	0.0187654	364	actin cytoskeleton [GO:0015629]; cytosol [GO:0005829]; Z disc [GO:0030018]; cytoskeletal protein binding [GO:0008092]; structural constituent of muscle [GO:0008307]; zinc ion binding [GO:0008270]; actin filament organization [GO:0007015]; heart development [GO:0007507]	actin cytoskeleton [GO:0015629]; cytosol [GO:0005829]; Z disc [GO:0030018]; cytoskeletal protein binding [GO:0008092]; structural constituent of muscle [GO:0008307]; zinc ion binding [GO:0008270]; actin filament organization [GO:0007015]; heart development [GO:0007507]	actin cytoskeleton [GO:0015629]; cytosol [GO:0005829]; Z disc [GO:0030018]; cytoskeletal protein binding [GO:0008092]; structural constituent of muscle [GO:0008307]; zinc ion binding [GO:0008270]; actin filament organization [GO:0007015]; heart development [GO:0007507]	May play a role in the organization of actin filament arrays within muscle cells. {ECO:0000250}.	39232	39
CDNF_HUMAN	-0.143515	0.0201777	CDNF	CDNF ARMETL1	Cerebral dopamine neurotrophic factor	-2.52385	-2.52881	0.01899	0.187662	0.183375	2.35568	20	0.0186794	0.0194006	0.0193246	187	endoplasmic reticulum [GO:0005783]; extracellular space [GO:0005615]; growth factor activity [GO:0008083]; dopaminergic neuron differentiation [GO:0071542]; neuron projection development [GO:0031175]	endoplasmic reticulum [GO:0005783]; extracellular space [GO:0005615]; growth factor activity [GO:0008083]; dopaminergic neuron differentiation [GO:0071542]; neuron projection development [GO:0031175]	endoplasmic reticulum [GO:0005783]; extracellular space [GO:0005615]; growth factor activity [GO:0008083]; dopaminergic neuron differentiation [GO:0071542]; neuron projection development [GO:0031175]	Trophic factor for dopamine neurons. Prevents the 6-hydroxydopamine (6-OHDA)-induced degeneration of dopaminergic neurons. When administered after 6-OHDA-lesioning, restores the dopaminergic function and prevents the degeneration of dopaminergic neurons in substantia nigra (By similarity). {ECO:0000250}.	20964	21
XK_HUMAN	-0.143867	0.00337426	XK	NA	NA	-4.68616	-2.50066	0.035717	0.122032	0.238887	2.35568	6	0.0186794	0.00188503	0.00661979
MA7D1_HUMAN	-0.144768	0.0407533	MAP7D1	MAP7D1 KIAA1187 PARCC1 RPRC1 PP2464	MAP7 domain-containing protein 1	-2.18749	-2.2216	0.0367354	0.25685	0.242328	2.35568	20	0.0186794	0.0262787	0.025478	841	cytosol [GO:0005829]; microtubule cytoskeleton [GO:0015630]; spindle [GO:0005819]; structural molecule activity [GO:0005198]; microtubule cytoskeleton organization [GO:0000226]	cytosol [GO:0005829]; microtubule cytoskeleton [GO:0015630]; spindle [GO:0005819]; structural molecule activity [GO:0005198]; microtubule cytoskeleton organization [GO:0000226]	cytosol [GO:0005829]; microtubule cytoskeleton [GO:0015630]; spindle [GO:0005819]; structural molecule activity [GO:0005198]; microtubule cytoskeleton organization [GO:0000226]		92820	93
GDE1_HUMAN	-0.14569	0.0475302	GDE1	GDE1 MIR16	Glycerophosphodiester phosphodiesterase 1	-2.1113	-2.15089	0.0425451	0.272684	0.260631	2.35568	20	0.0186794	0.0285701	0.0275279	331	cytoplasmic vesicle membrane [GO:0030659]; integral component of membrane [GO:0016021]; plasma membrane [GO:0005886]; glycerophosphodiester phosphodiesterase activity [GO:0008889]; glycerophosphoinositol glycerophosphodiesterase activity [GO:0047395]; metal ion binding [GO:0046872]; glycerophospholipid catabolic process [GO:0046475]; lipid metabolic process [GO:0006629]	cytoplasmic vesicle membrane [GO:0030659]; integral component of membrane [GO:0016021]; plasma membrane [GO:0005886]; glycerophosphodiester phosphodiesterase activity [GO:0008889]; glycerophosphoinositol glycerophosphodiesterase activity [GO:0047395]; metal ion binding [GO:0046872]; glycerophospholipid catabolic process [GO:0046475]; lipid metabolic process [GO:0006629]	cytoplasmic vesicle membrane [GO:0030659]; integral component of membrane [GO:0016021]; plasma membrane [GO:0005886]; glycerophosphodiester phosphodiesterase activity [GO:0008889]; glycerophosphoinositol glycerophosphodiesterase activity [GO:0047395]; metal ion binding [GO:0046872]; glycerophospholipid catabolic process [GO:0046475]; lipid metabolic process [GO:0006629]	Has glycerophosphoinositol phosphodiesterase activity. Has little or no activity towards glycerophosphocholine. GDE1 activity can be modulated by G-protein signaling pathways (By similarity). {ECO:0000250}.	37718	38
AMRP_HUMAN	-0.14576	0.0331804	LRPAP1	LRPAP1 A2MRAP	Alpha-2-macroglobulin receptor-associated protein	-2.28772	-2.31634	0.0300815	0.234771	0.222895	2.35568	20	0.0186794	0.0243567	0.0237585	357	cell surface [GO:0009986]; cis-Golgi network [GO:0005801]; endoplasmic reticulum [GO:0005783]; endoplasmic reticulum-Golgi intermediate compartment [GO:0005793]; endosome [GO:0005768]; endosome lumen [GO:0031904]; extracellular region [GO:0005576]; Golgi apparatus [GO:0005794]; Golgi lumen [GO:0005796]; plasma membrane [GO:0005886]; rough endoplasmic reticulum lumen [GO:0048237]; heparin binding …	cell surface [GO:0009986]; cis-Golgi network [GO:0005801]; endoplasmic reticulum [GO:0005783]; endoplasmic reticulum-Golgi intermediate compartment [GO:0005793]; endosome [GO:0005768]; endosome lumen [GO:0031904]; extracellular region [GO:0005576]; Golgi apparatus [GO:0005794]; Golgi lumen [GO:0005796]; plasma membrane [GO:0005886]; rough endoplasmic reticulum lumen [GO:0048237]; heparin binding …	cell surface [GO:0009986]; cis-Golgi network [GO:0005801]; endoplasmic reticulum [GO:0005783]; endoplasmic reticulum-Golgi intermediate compartment [GO:0005793]; endosome [GO:0005768]; endosome lumen [GO:0031904]; extracellular region [GO:0005576]; Golgi apparatus [GO:0005794]; Golgi lumen [GO:0005796]; plasma membrane [GO:0005886]; rough endoplasmic reticulum lumen [GO:0048237]; heparin binding …	Molecular chaperone for LDL receptor-related proteins that may regulate their ligand binding activity along the secretory pathway. {ECO:0000269|PubMed:7774585}.	41466	41
SRP09_HUMAN	-0.146429	0.00152579	SRP9	SRP9	Signal recognition particle 9 kDa protein	-3.66829	-3.49677	0.00200419	0.112467	0.108611	2.35568	20	0.0186794	0.00956043	0.0105213	86	cytosol [GO:0005829]; extracellular exosome [GO:0070062]; signal recognition particle receptor complex [GO:0005785]; signal recognition particle, endoplasmic reticulum targeting [GO:0005786]; 7S RNA binding [GO:0008312]; RNA binding [GO:0003723]; signal recognition particle binding [GO:0005047]; negative regulation of translational elongation [GO:0045900]; SRP-dependent cotranslational protein ta…	cytosol [GO:0005829]; extracellular exosome [GO:0070062]; signal recognition particle receptor complex [GO:0005785]; signal recognition particle, endoplasmic reticulum targeting [GO:0005786]; 7S RNA binding [GO:0008312]; RNA binding [GO:0003723]; signal recognition particle binding [GO:0005047]; negative regulation of translational elongation [GO:0045900]; SRP-dependent cotranslational protein ta…	cytosol [GO:0005829]; extracellular exosome [GO:0070062]; signal recognition particle receptor complex [GO:0005785]; signal recognition particle, endoplasmic reticulum targeting [GO:0005786]; 7S RNA binding [GO:0008312]; RNA binding [GO:0003723]; signal recognition particle binding [GO:0005047]; negative regulation of translational elongation [GO:0045900]; SRP-dependent cotranslational protein ta…	Signal-recognition-particle assembly has a crucial role in targeting secretory proteins to the rough endoplasmic reticulum membrane. SRP9 together with SRP14 and the Alu portion of the SRP RNA, constitutes the elongation arrest domain of SRP. The complex of SRP9 and SRP14 is required for SRP RNA binding.	10112	10
SMCO1_HUMAN	-0.146617	0.0377024	SMCO1	SMCO1 C3orf43	Single-pass membrane and coiled-coil domain-containing protein 1	-2.22563	-2.25953	0.033925	0.24818	0.23306	2.35568	20	0.0186794	0.0260384	0.0252629	214	integral component of membrane [GO:0016021]	integral component of membrane [GO:0016021]	integral component of membrane [GO:0016021]		24598	25
LMOD1_HUMAN	-0.146794	0.0282623	LMOD1	LMOD1	Leiomodin-1	-2.3648	-2.3891	0.0257434	0.216883	0.208864	2.35568	20	0.0186794	0.0231195	0.0226516	600	actin filament [GO:0005884]; cytosol [GO:0005829]; membrane [GO:0016020]; myofibril [GO:0030016]; sarcomere [GO:0030017]; actin binding [GO:0003779]; tropomyosin binding [GO:0005523]; actin nucleation [GO:0045010]; muscle contraction [GO:0006936]; pointed-end actin filament capping [GO:0051694]; positive regulation of actin filament polymerization [GO:0030838]	actin filament [GO:0005884]; cytosol [GO:0005829]; membrane [GO:0016020]; myofibril [GO:0030016]; sarcomere [GO:0030017]; actin binding [GO:0003779]; tropomyosin binding [GO:0005523]; actin nucleation [GO:0045010]; muscle contraction [GO:0006936]; pointed-end actin filament capping [GO:0051694]; positive regulation of actin filament polymerization [GO:0030838]	actin filament [GO:0005884]; cytosol [GO:0005829]; membrane [GO:0016020]; myofibril [GO:0030016]; sarcomere [GO:0030017]; actin binding [GO:0003779]; tropomyosin binding [GO:0005523]; actin nucleation [GO:0045010]; muscle contraction [GO:0006936]; pointed-end actin filament capping [GO:0051694]; positive regulation of actin filament polymerization [GO:0030838]	Mediates nucleation of actin filaments. {ECO:0000269|PubMed:26370058}.	67030	67
HSP72_HUMAN	-0.147374	0.0292817	HSPA2	HSPA2	Heat shock-related 70 kDa protein 2	-2.34786	-2.37425	0.0265786	0.221916	0.211964	2.35568	20	0.0186794	0.0236403	0.0231175	639	blood microparticle [GO:0072562]; CatSper complex [GO:0036128]; cytosol [GO:0005829]; extracellular exosome [GO:0070062]; meiotic spindle [GO:0072687]; membrane [GO:0016020]; nucleus [GO:0005634]; ATP binding [GO:0005524]; disordered domain specific binding [GO:0097718]; enzyme binding [GO:0019899]; unfolded protein binding [GO:0051082]; male meiotic nuclear division [GO:0007140]; negative regula…	blood microparticle [GO:0072562]; CatSper complex [GO:0036128]; cytosol [GO:0005829]; extracellular exosome [GO:0070062]; meiotic spindle [GO:0072687]; membrane [GO:0016020]; nucleus [GO:0005634]; ATP binding [GO:0005524]; disordered domain specific binding [GO:0097718]; enzyme binding [GO:0019899]; unfolded protein binding [GO:0051082]; male meiotic nuclear division [GO:0007140]; negative regula…	blood microparticle [GO:0072562]; CatSper complex [GO:0036128]; cytosol [GO:0005829]; extracellular exosome [GO:0070062]; meiotic spindle [GO:0072687]; membrane [GO:0016020]; nucleus [GO:0005634]; ATP binding [GO:0005524]; disordered domain specific binding [GO:0097718]; enzyme binding [GO:0019899]; unfolded protein binding [GO:0051082]; male meiotic nuclear division [GO:0007140]; negative regula…	Molecular chaperone implicated in a wide variety of cellular processes, including protection of the proteome from stress, folding and transport of newly synthesized polypeptides, activation of proteolysis of misfolded proteins and the formation and dissociation of protein complexes. Plays a pivotal role in the protein quality control system, ensuring the correct folding of proteins, the re-foldin…	70021	70
RANB9_HUMAN	-0.147734	0.00921999	RANBP9	RANBP9 RANBPM	Ran-binding protein 9	-2.88184	-2.85421	0.00913247	0.142611	0.141556	2.35568	20	0.0186794	0.0157679	0.0160747	729	cytoplasm [GO:0005737]; cytosol [GO:0005829]; microtubule associated complex [GO:0005875]; nucleus [GO:0005634]; plasma membrane [GO:0005886]; enzyme binding [GO:0019899]; Ran GTPase binding [GO:0008536]; Ras guanyl-nucleotide exchange factor activity [GO:0005088]; axon guidance [GO:0007411]; MAPK cascade [GO:0000165]; microtubule nucleation [GO:0007020]; negative regulation of ERK1 and ERK2 casc…	cytoplasm [GO:0005737]; cytosol [GO:0005829]; microtubule associated complex [GO:0005875]; nucleus [GO:0005634]; plasma membrane [GO:0005886]; enzyme binding [GO:0019899]; Ran GTPase binding [GO:0008536]; Ras guanyl-nucleotide exchange factor activity [GO:0005088]; axon guidance [GO:0007411]; MAPK cascade [GO:0000165]; microtubule nucleation [GO:0007020]; negative regulation of ERK1 and ERK2 casc…	cytoplasm [GO:0005737]; cytosol [GO:0005829]; microtubule associated complex [GO:0005875]; nucleus [GO:0005634]; plasma membrane [GO:0005886]; enzyme binding [GO:0019899]; Ran GTPase binding [GO:0008536]; Ras guanyl-nucleotide exchange factor activity [GO:0005088]; axon guidance [GO:0007411]; MAPK cascade [GO:0000165]; microtubule nucleation [GO:0007020]; negative regulation of ERK1 and ERK2 casc…	May act as an adapter protein to couple membrane receptors to intracellular signaling pathways. May be involved in signaling of ITGB2/LFA-1 and other integrins. Enhances HGF-MET signaling by recruiting Sos and activating the Ras pathway. Enhances dihydrotestosterone-induced transactivation activity of AR, as well as dexamethasone-induced transactivation activity of NR3C1, but not affect estrogen-…	77847	78
CNST_HUMAN	-0.148168	0.0117502	CNST	CNST C1orf71	Consortin	-2.77247	-2.75941	0.0113382	0.156697	0.15273	2.35568	20	0.0186794	0.0171368	0.0172993	725	integral component of membrane [GO:0016021]; intracellular membrane-bounded organelle [GO:0043231]; membrane [GO:0016020]; plasma membrane [GO:0005886]; protein complex [GO:0043234]; trans-Golgi network [GO:0005802]; transport vesicle [GO:0030133]; connexin binding [GO:0071253]; phosphatase binding [GO:0019902]; negative regulation of phosphatase activity [GO:0010923]; positive regulation of Golg…	integral component of membrane [GO:0016021]; intracellular membrane-bounded organelle [GO:0043231]; membrane [GO:0016020]; plasma membrane [GO:0005886]; protein complex [GO:0043234]; trans-Golgi network [GO:0005802]; transport vesicle [GO:0030133]; connexin binding [GO:0071253]; phosphatase binding [GO:0019902]; negative regulation of phosphatase activity [GO:0010923]; positive regulation of Golg…	integral component of membrane [GO:0016021]; intracellular membrane-bounded organelle [GO:0043231]; membrane [GO:0016020]; plasma membrane [GO:0005886]; protein complex [GO:0043234]; trans-Golgi network [GO:0005802]; transport vesicle [GO:0030133]; connexin binding [GO:0071253]; phosphatase binding [GO:0019902]; negative regulation of phosphatase activity [GO:0010923]; positive regulation of Golg…	Required for targeting of connexins to the plasma membrane. {ECO:0000269|PubMed:19864490}.	79597	80
ERH_HUMAN	-0.148766	0.0227116	ERH	ERH	Enhancer of rudimentary homolog	-2.58336	-2.50608	0.0239057	0.198864	0.202752	2.35568	13	0.0186794	0.0132648	0.0140955	104	methylosome [GO:0034709]; midbody [GO:0030496]; methyl-CpG binding [GO:0008327]; RNA binding [GO:0003723]; cell cycle [GO:0007049]; nucleobase-containing compound metabolic process [GO:0006139]; positive regulation of Notch signaling pathway [GO:0045747]; pyrimidine nucleoside metabolic process [GO:0006213]; pyrimidine nucleotide biosynthetic process [GO:0006221]	methylosome [GO:0034709]; midbody [GO:0030496]; methyl-CpG binding [GO:0008327]; RNA binding [GO:0003723]; cell cycle [GO:0007049]; nucleobase-containing compound metabolic process [GO:0006139]; positive regulation of Notch signaling pathway [GO:0045747]; pyrimidine nucleoside metabolic process [GO:0006213]; pyrimidine nucleotide biosynthetic process [GO:0006221]	methylosome [GO:0034709]; midbody [GO:0030496]; methyl-CpG binding [GO:0008327]; RNA binding [GO:0003723]; cell cycle [GO:0007049]; nucleobase-containing compound metabolic process [GO:0006139]; positive regulation of Notch signaling pathway [GO:0045747]; pyrimidine nucleoside metabolic process [GO:0006213]; pyrimidine nucleotide biosynthetic process [GO:0006221]	May have a role in the cell cycle.	12259	12
I23O1_HUMAN	-0.150624	0.0126333	IDO1	NA	NA	-2.73955	-2.73525	0.0119764	0.160482	0.155949	2.35568	20	0.0186794	0.0181376	0.0181947
PADI2_HUMAN	-0.151035	0.00747891	PADI2	PADI2 KIAA0994 PAD2 PDI2	Protein-arginine deiminase type-2	-2.97537	-2.94326	0.00743771	0.138894	0.132753	2.35568	20	0.0186794	0.0154605	0.0157997	665	azurophil granule lumen [GO:0035578]; cytoplasm [GO:0005737]; cytosol [GO:0005829]; extracellular exosome [GO:0070062]; extracellular region [GO:0005576]; nucleus [GO:0005634]; transcriptionally active chromatin [GO:0035327]; calcium ion binding [GO:0005509]; estrogen receptor binding [GO:0030331]; protein-arginine deiminase activity [GO:0004668]; chromatin organization [GO:0006325]; chromatin-me…	azurophil granule lumen [GO:0035578]; cytoplasm [GO:0005737]; cytosol [GO:0005829]; extracellular exosome [GO:0070062]; extracellular region [GO:0005576]; nucleus [GO:0005634]; transcriptionally active chromatin [GO:0035327]; calcium ion binding [GO:0005509]; estrogen receptor binding [GO:0030331]; protein-arginine deiminase activity [GO:0004668]; chromatin organization [GO:0006325]; chromatin-me…	azurophil granule lumen [GO:0035578]; cytoplasm [GO:0005737]; cytosol [GO:0005829]; extracellular exosome [GO:0070062]; extracellular region [GO:0005576]; nucleus [GO:0005634]; transcriptionally active chromatin [GO:0035327]; calcium ion binding [GO:0005509]; estrogen receptor binding [GO:0030331]; protein-arginine deiminase activity [GO:0004668]; chromatin organization [GO:0006325]; chromatin-me…	Catalyzes the deimination of arginine residues of proteins. {ECO:0000250}.	75564	76
HYI_HUMAN	-0.152252	0.03299	HYI	HYI HT036 SB156	Putative hydroxypyruvate isomerase	-2.2905	-2.327	0.0294064	0.234145	0.219952	2.35568	20	0.0186794	0.0265105	0.0256853	277	hydroxypyruvate isomerase activity [GO:0008903]	hydroxypyruvate isomerase activity [GO:0008903]	hydroxypyruvate isomerase activity [GO:0008903]	Catalyzes the reversible isomerization between hydroxypyruvate and 2-hydroxy-3-oxopropanoate (also termed tartronate semialdehyde). {ECO:0000250}.	30406	30
ANR35_HUMAN	-0.152482	0.0172873	ANKRD35	ANKRD35	Ankyrin repeat domain-containing protein 35	-2.59569	-2.60918	0.0158945	0.178455	0.171515	2.35568	20	0.0186794	0.0207054	0.0204919	1001					109966	110
TM38A_HUMAN	-0.154247	0.0190481	TMEM38A	TMEM38A	Trimeric intracellular cation channel type A	-2.5507	-2.57091	0.0173041	0.183709	0.17705	2.35568	20	0.0186794	0.0219416	0.0215979	299	extracellular exosome [GO:0070062]; integral component of membrane [GO:0016021]; nuclear membrane [GO:0031965]; sarcoplasmic reticulum [GO:0016529]; sarcoplasmic reticulum membrane [GO:0033017]; calcium-activated potassium channel activity [GO:0015269]; potassium channel activity [GO:0005267]	extracellular exosome [GO:0070062]; integral component of membrane [GO:0016021]; nuclear membrane [GO:0031965]; sarcoplasmic reticulum [GO:0016529]; sarcoplasmic reticulum membrane [GO:0033017]; calcium-activated potassium channel activity [GO:0015269]; potassium channel activity [GO:0005267]	extracellular exosome [GO:0070062]; integral component of membrane [GO:0016021]; nuclear membrane [GO:0031965]; sarcoplasmic reticulum [GO:0016529]; sarcoplasmic reticulum membrane [GO:0033017]; calcium-activated potassium channel activity [GO:0015269]; potassium channel activity [GO:0005267]	Monovalent cation channel required for maintenance of rapid intracellular calcium release. May act as a potassium counter-ion channel that functions in synchronization with calcium release from intracellular stores. {ECO:0000250|UniProtKB:Q3TMP8}.	33260	33
DPP2_HUMAN	-0.154277	0.0175285	DPP7	DPP7 DPP2 QPP	Dipeptidyl peptidase 2	-2.58928	-2.60623	0.015999	0.179039	0.171515	2.35568	20	0.0186794	0.0213009	0.0210247	492	azurophil granule lumen [GO:0035578]; cytosol [GO:0005829]; extracellular exosome [GO:0070062]; extracellular region [GO:0005576]; Golgi apparatus [GO:0005794]; intracellular membrane-bounded organelle [GO:0043231]; vesicle [GO:0031982]; dipeptidyl-peptidase activity [GO:0008239]; serine-type peptidase activity [GO:0008236]; neutrophil degranulation [GO:0043312]	azurophil granule lumen [GO:0035578]; cytosol [GO:0005829]; extracellular exosome [GO:0070062]; extracellular region [GO:0005576]; Golgi apparatus [GO:0005794]; intracellular membrane-bounded organelle [GO:0043231]; vesicle [GO:0031982]; dipeptidyl-peptidase activity [GO:0008239]; serine-type peptidase activity [GO:0008236]; neutrophil degranulation [GO:0043312]	azurophil granule lumen [GO:0035578]; cytosol [GO:0005829]; extracellular exosome [GO:0070062]; extracellular region [GO:0005576]; Golgi apparatus [GO:0005794]; intracellular membrane-bounded organelle [GO:0043231]; vesicle [GO:0031982]; dipeptidyl-peptidase activity [GO:0008239]; serine-type peptidase activity [GO:0008236]; neutrophil degranulation [GO:0043312]	Plays an important role in the degradation of some oligopeptides. {ECO:0000269|PubMed:15487984}.	54341	54
RBM14_HUMAN	-0.156541	0.00114216	RBM14	RBM14 SIP	RNA-binding protein 14	-3.79257	-3.63733	0.00142619	0.110441	0.108611	2.35568	20	0.0186794	0.0102221	0.0111133	669	cytoplasm [GO:0005737]; intracellular ribonucleoprotein complex [GO:0030529]; mediator complex [GO:0016592]; nuclear speck [GO:0016607]; nucleolus [GO:0005730]; nucleus [GO:0005634]; transcription factor complex [GO:0005667]; ligand-dependent nuclear receptor transcription coactivator activity [GO:0030374]; protein binding, bridging [GO:0030674]; RNA binding [GO:0003723]; RNA polymerase II transc…	cytoplasm [GO:0005737]; intracellular ribonucleoprotein complex [GO:0030529]; mediator complex [GO:0016592]; nuclear speck [GO:0016607]; nucleolus [GO:0005730]; nucleus [GO:0005634]; transcription factor complex [GO:0005667]; ligand-dependent nuclear receptor transcription coactivator activity [GO:0030374]; protein binding, bridging [GO:0030674]; RNA binding [GO:0003723]; RNA polymerase II transc…	cytoplasm [GO:0005737]; intracellular ribonucleoprotein complex [GO:0030529]; mediator complex [GO:0016592]; nuclear speck [GO:0016607]; nucleolus [GO:0005730]; nucleus [GO:0005634]; transcription factor complex [GO:0005667]; ligand-dependent nuclear receptor transcription coactivator activity [GO:0030374]; protein binding, bridging [GO:0030674]; RNA binding [GO:0003723]; RNA polymerase II transc…	Isoform 1 may function as a nuclear receptor coactivator, enhancing transcription through other coactivators such as NCOA6 and CITED1. Isoform 2, functions as a transcriptional repressor, modulating transcriptional activities of coactivators including isoform 1, NCOA6 and CITED1 (PubMed:11443112). Regulates centriole biogenesis by suppressing the formation of aberrant centriolar protein complexes…	69492	69
RASA1_HUMAN	-0.158152	0.0305126	RASA1	NA	NA	-2.42682	-2.40849	0.0289997	0.225664	0.219124	2.35568	13	0.0186794	0.0169878	0.0172473
KRI1_HUMAN	-0.158844	0.0105416	KRI1	NA	NA	-2.82156	-2.8242	0.00978233	0.150268	0.146548	2.35568	20	0.0186794	0.0190156	0.0189802
SAFB1_HUMAN	-0.159193	0.000376876	SAFB	SAFB HAP HET SAFB1	Scaffold attachment factor B1	-4.26695	-4.01346	0.000568968	0.0978309	0.0988917	2.35568	20	0.0186794	0.00835154	0.00943982	915	nucleoplasm [GO:0005654]; nucleus [GO:0005634]; chromatin binding [GO:0003682]; core promoter binding [GO:0001047]; double-stranded DNA binding [GO:0003690]; RNA binding [GO:0003723]; sequence-specific DNA binding [GO:0043565]; chromatin organization [GO:0006325]; growth [GO:0040007]; hormone metabolic process [GO:0042445]; intracellular estrogen receptor signaling pathway [GO:0030520]; positive …	nucleoplasm [GO:0005654]; nucleus [GO:0005634]; chromatin binding [GO:0003682]; core promoter binding [GO:0001047]; double-stranded DNA binding [GO:0003690]; RNA binding [GO:0003723]; sequence-specific DNA binding [GO:0043565]; chromatin organization [GO:0006325]; growth [GO:0040007]; hormone metabolic process [GO:0042445]; intracellular estrogen receptor signaling pathway [GO:0030520]; positive …	nucleoplasm [GO:0005654]; nucleus [GO:0005634]; chromatin binding [GO:0003682]; core promoter binding [GO:0001047]; double-stranded DNA binding [GO:0003690]; RNA binding [GO:0003723]; sequence-specific DNA binding [GO:0043565]; chromatin organization [GO:0006325]; growth [GO:0040007]; hormone metabolic process [GO:0042445]; intracellular estrogen receptor signaling pathway [GO:0030520]; positive …	Binds to scaffold/matrix attachment region (S/MAR) DNA and forms a molecular assembly point to allow the formation of a 'transcriptosomal' complex (consisting of SR proteins and RNA polymerase II) coupling transcription and RNA processing (By similarity). Can function as an estrogen receptor corepressor and can also bind to the HSP27 promoter and decrease its transcription. When associated with R…	102642	103
HSPB1_HUMAN	-0.159282	0.00945301	HSPB1	HSPB1 HSP27 HSP28	Heat shock protein beta-1	-2.87064	-2.86894	0.00882863	0.143709	0.139658	2.35568	20	0.0186794	0.0184725	0.0184943	205	axon cytoplasm [GO:1904115]; cytoplasm [GO:0005737]; cytoskeleton [GO:0005856]; cytosol [GO:0005829]; extracellular exosome [GO:0070062]; extracellular matrix [GO:0031012]; extracellular space [GO:0005615]; focal adhesion [GO:0005925]; nucleus [GO:0005634]; plasma membrane [GO:0005886]; proteasome complex [GO:0000502]; spindle [GO:0005819]; Z disc [GO:0030018]; identical protein binding [GO:00428…	axon cytoplasm [GO:1904115]; cytoplasm [GO:0005737]; cytoskeleton [GO:0005856]; cytosol [GO:0005829]; extracellular exosome [GO:0070062]; extracellular matrix [GO:0031012]; extracellular space [GO:0005615]; focal adhesion [GO:0005925]; nucleus [GO:0005634]; plasma membrane [GO:0005886]; proteasome complex [GO:0000502]; spindle [GO:0005819]; Z disc [GO:0030018]; identical protein binding [GO:00428…	axon cytoplasm [GO:1904115]; cytoplasm [GO:0005737]; cytoskeleton [GO:0005856]; cytosol [GO:0005829]; extracellular exosome [GO:0070062]; extracellular matrix [GO:0031012]; extracellular space [GO:0005615]; focal adhesion [GO:0005925]; nucleus [GO:0005634]; plasma membrane [GO:0005886]; proteasome complex [GO:0000502]; spindle [GO:0005819]; Z disc [GO:0030018]; identical protein binding [GO:00428…	Small heat shock protein which functions as a molecular chaperone probably maintaining denatured proteins in a folding-competent state (PubMed:10383393, PubMed:20178975). Plays a role in stress resistance and actin organization (PubMed:19166925). Through its molecular chaperone activity may regulate numerous biological processes including the phosphorylation and the axonal transport of neurofilam…	22783	23
IRS1_HUMAN	-0.159744	0.0130012	IRS1	IRS1	Insulin receptor substrate 1	-2.72648	-2.73995	0.0118496	0.162628	0.155949	2.35568	20	0.0186794	0.0205966	0.0203946	1242	caveola [GO:0005901]; cytoplasm [GO:0005737]; cytosol [GO:0005829]; insulin receptor complex [GO:0005899]; intracellular membrane-bounded organelle [GO:0043231]; nucleus [GO:0005634]; plasma membrane [GO:0005886]; 1-phosphatidylinositol-3-kinase activity [GO:0016303]; insulin receptor binding [GO:0005158]; insulin-like growth factor receptor binding [GO:0005159]; phosphatidylinositol 3-kinase bin…	caveola [GO:0005901]; cytoplasm [GO:0005737]; cytosol [GO:0005829]; insulin receptor complex [GO:0005899]; intracellular membrane-bounded organelle [GO:0043231]; nucleus [GO:0005634]; plasma membrane [GO:0005886]; 1-phosphatidylinositol-3-kinase activity [GO:0016303]; insulin receptor binding [GO:0005158]; insulin-like growth factor receptor binding [GO:0005159]; phosphatidylinositol 3-kinase bin…	caveola [GO:0005901]; cytoplasm [GO:0005737]; cytosol [GO:0005829]; insulin receptor complex [GO:0005899]; intracellular membrane-bounded organelle [GO:0043231]; nucleus [GO:0005634]; plasma membrane [GO:0005886]; 1-phosphatidylinositol-3-kinase activity [GO:0016303]; insulin receptor binding [GO:0005158]; insulin-like growth factor receptor binding [GO:0005159]; phosphatidylinositol 3-kinase bin…	May mediate the control of various cellular processes by insulin. When phosphorylated by the insulin receptor binds specifically to various cellular proteins containing SH2 domains such as phosphatidylinositol 3-kinase p85 subunit or GRB2. Activates phosphatidylinositol 3-kinase when bound to the regulatory p85 subunit (By similarity). {ECO:0000250, ECO:0000269|PubMed:16878150}.	131591	132
CD2B2_HUMAN	-0.160799	0.0336675	CD2BP2	NA	NA	-2.28067	-2.32695	0.0294099	0.235449	0.219952	2.35568	20	0.0186794	0.0298259	0.0286514
PRIO_HUMAN	-0.162387	0.0400882	PRNP	NA	NA	-2.19558	-2.24718	0.0348177	0.256044	0.235161	2.35568	20	0.0186794	0.0328214	0.0313313
TDIF1_HUMAN	-0.165431	0.0489167	DNTTIP1	NA	NA	-2.17234	-2.20554	0.0430459	0.276972	0.26156	2.35568	13	0.0186794	0.0231973	0.0225042
TRA2A_HUMAN	-0.167045	0.000400429	TRA2A	TRA2A	Transformer-2 protein homolog alpha	-4.24101	-4.03252	0.000542958	0.0978309	0.0988917	2.35568	20	0.0186794	0.00930855	0.010296	282	intracellular membrane-bounded organelle [GO:0043231]; nucleolus [GO:0005730]; nucleus [GO:0005634]; RNA binding [GO:0003723]; mRNA splicing, via spliceosome [GO:0000398]	intracellular membrane-bounded organelle [GO:0043231]; nucleolus [GO:0005730]; nucleus [GO:0005634]; RNA binding [GO:0003723]; mRNA splicing, via spliceosome [GO:0000398]	intracellular membrane-bounded organelle [GO:0043231]; nucleolus [GO:0005730]; nucleus [GO:0005634]; RNA binding [GO:0003723]; mRNA splicing, via spliceosome [GO:0000398]	Sequence-specific RNA-binding protein which participates in the control of pre-mRNA splicing. {ECO:0000269|PubMed:9546399}.	32689	33
KANK1_HUMAN	-0.167161	0.0347549	KANK1	NA	NA	-2.71757	-2.28537	0.0502912	0.239049	0.277346	2.35568	6	0.0186794	0.00756731	0.0107001
SPTN2_HUMAN	-0.167475	0.036408	SPTBN2	NA	NA	-2.68264	-2.27238	0.0513402	0.243655	0.279921	2.35568	6	0.0186794	0.00779481	0.0108635
CPZIP_HUMAN	-0.167702	0.00860592	RCSD1	RCSD1 CAPZIP	CapZ-interacting protein	-2.91273	-2.92211	0.00781061	0.142081	0.132983	2.35568	20	0.0186794	0.0198898	0.0197623	416	actin filament [GO:0005884]; actin filament binding [GO:0051015]; cellular hyperosmotic response [GO:0071474]; skeletal muscle contraction [GO:0003009]	actin filament [GO:0005884]; actin filament binding [GO:0051015]; cellular hyperosmotic response [GO:0071474]; skeletal muscle contraction [GO:0003009]	actin filament [GO:0005884]; actin filament binding [GO:0051015]; cellular hyperosmotic response [GO:0071474]; skeletal muscle contraction [GO:0003009]	Stress-induced phosphorylation of CAPZIP may regulate the ability of F-actin-capping protein to remodel actin filament assembly. {ECO:0000269|PubMed:15850461}.	44504	45
5NT1A_HUMAN	-0.168023	0.0145848	NT5C1A	NT5C1A	Cytosolic 5'-nucleotidase 1A	-2.67396	-2.70426	0.0128446	0.168668	0.157885	2.35568	20	0.0186794	0.0236909	0.0231628	368	cytosol [GO:0005829]; 5'-nucleotidase activity [GO:0008253]; magnesium ion binding [GO:0000287]; nucleotide binding [GO:0000166]; adenosine metabolic process [GO:0046085]; nucleoside metabolic process [GO:0009116]; purine nucleoside monophosphate catabolic process [GO:0009128]; purine nucleotide catabolic process [GO:0006195]; pyrimidine nucleoside catabolic process [GO:0046135]	cytosol [GO:0005829]; 5'-nucleotidase activity [GO:0008253]; magnesium ion binding [GO:0000287]; nucleotide binding [GO:0000166]; adenosine metabolic process [GO:0046085]; nucleoside metabolic process [GO:0009116]; purine nucleoside monophosphate catabolic process [GO:0009128]; purine nucleotide catabolic process [GO:0006195]; pyrimidine nucleoside catabolic process [GO:0046135]	cytosol [GO:0005829]; 5'-nucleotidase activity [GO:0008253]; magnesium ion binding [GO:0000287]; nucleotide binding [GO:0000166]; adenosine metabolic process [GO:0046085]; nucleoside metabolic process [GO:0009116]; purine nucleoside monophosphate catabolic process [GO:0009128]; purine nucleotide catabolic process [GO:0006195]; pyrimidine nucleoside catabolic process [GO:0046135]	Dephosphorylates the 5' and 2'(3')-phosphates of deoxyribonucleotides and has a broad substrate specificity. Helps to regulate adenosine levels in heart during ischemia and hypoxia. {ECO:0000269|PubMed:11133996}.	41021	41
IMPA2_HUMAN	-0.168207	0.0408329	IMPA2	IMPA2 IMP.18P	Inositol monophosphatase 2	-2.18653	-2.24326	0.0351056	0.257021	0.236111	2.35568	20	0.0186794	0.0355081	0.0337348	288	cytoplasm [GO:0005737]; cytosol [GO:0005829]; inositol monophosphate 1-phosphatase activity [GO:0008934]; inositol monophosphate 3-phosphatase activity [GO:0052832]; inositol monophosphate 4-phosphatase activity [GO:0052833]; metal ion binding [GO:0046872]; protein homodimerization activity [GO:0042803]; inositol biosynthetic process [GO:0006021]; inositol metabolic process [GO:0006020]; inositol…	cytoplasm [GO:0005737]; cytosol [GO:0005829]; inositol monophosphate 1-phosphatase activity [GO:0008934]; inositol monophosphate 3-phosphatase activity [GO:0052832]; inositol monophosphate 4-phosphatase activity [GO:0052833]; metal ion binding [GO:0046872]; protein homodimerization activity [GO:0042803]; inositol biosynthetic process [GO:0006021]; inositol metabolic process [GO:0006020]; inositol…	cytoplasm [GO:0005737]; cytosol [GO:0005829]; inositol monophosphate 1-phosphatase activity [GO:0008934]; inositol monophosphate 3-phosphatase activity [GO:0052832]; inositol monophosphate 4-phosphatase activity [GO:0052833]; metal ion binding [GO:0046872]; protein homodimerization activity [GO:0042803]; inositol biosynthetic process [GO:0006021]; inositol metabolic process [GO:0006020]; inositol…	Can use myo-inositol monophosphates, scylloinositol 1,4-diphosphate, glucose-1-phosphate, beta-glycerophosphate, and 2'-AMP as substrates. Has been implicated as the pharmacological target for lithium Li(+) action in brain. {ECO:0000269|PubMed:17068342}.	31321	31
KCC2A_HUMAN	-0.169463	0.00112941	CAMK2A	CAMK2A CAMKA KIAA0968	Calcium/calmodulin-dependent protein kinase type II subunit alpha	-3.79738	-3.68947	0.00125643	0.110441	0.108611	2.35568	20	0.0186794	0.0119491	0.0126583	478	cell junction [GO:0030054]; cytoplasm [GO:0005737]; cytosol [GO:0005829]; endocytic vesicle membrane [GO:0030666]; mitochondrion [GO:0005739]; neuron projection [GO:0043005]; nucleoplasm [GO:0005654]; nucleus [GO:0005634]; plasma membrane [GO:0005886]; postsynaptic density [GO:0014069]; presynaptic membrane [GO:0042734]; ATP binding [GO:0005524]; calcium-dependent protein serine/threonine kinase …	cell junction [GO:0030054]; cytoplasm [GO:0005737]; cytosol [GO:0005829]; endocytic vesicle membrane [GO:0030666]; mitochondrion [GO:0005739]; neuron projection [GO:0043005]; nucleoplasm [GO:0005654]; nucleus [GO:0005634]; plasma membrane [GO:0005886]; postsynaptic density [GO:0014069]; presynaptic membrane [GO:0042734]; ATP binding [GO:0005524]; calcium-dependent protein serine/threonine kinase …	cell junction [GO:0030054]; cytoplasm [GO:0005737]; cytosol [GO:0005829]; endocytic vesicle membrane [GO:0030666]; mitochondrion [GO:0005739]; neuron projection [GO:0043005]; nucleoplasm [GO:0005654]; nucleus [GO:0005634]; plasma membrane [GO:0005886]; postsynaptic density [GO:0014069]; presynaptic membrane [GO:0042734]; ATP binding [GO:0005524]; calcium-dependent protein serine/threonine kinase …	CaM-kinase II (CAMK2) is a prominent kinase in the central nervous system that may function in long-term potentiation and neurotransmitter release. Member of the NMDAR signaling complex in excitatory synapses it may regulate NMDAR-dependent potentiation of the AMPAR and synaptic plasticity (By similarity). Phosphorylates transcription factor FOXO3 on 'Ser-298' (PubMed:23805378). Activates FOXO3 t…	54088	54
SMTL1_HUMAN	-0.170044	0.0326471	SMTNL1	SMTNL1	Smoothelin-like protein 1	-2.29555	-2.34973	0.0280133	0.233148	0.217957	2.35568	20	0.0186794	0.032923	0.0314221	457	contractile fiber [GO:0043292]; cytoplasm [GO:0005737]; I band [GO:0031674]; M band [GO:0031430]; nucleus [GO:0005634]; calmodulin binding [GO:0005516]; negative regulation of blood vessel diameter [GO:0097756]; positive regulation of vasoconstriction [GO:0045907]	contractile fiber [GO:0043292]; cytoplasm [GO:0005737]; I band [GO:0031674]; M band [GO:0031430]; nucleus [GO:0005634]; calmodulin binding [GO:0005516]; negative regulation of blood vessel diameter [GO:0097756]; positive regulation of vasoconstriction [GO:0045907]	contractile fiber [GO:0043292]; cytoplasm [GO:0005737]; I band [GO:0031674]; M band [GO:0031430]; nucleus [GO:0005634]; calmodulin binding [GO:0005516]; negative regulation of blood vessel diameter [GO:0097756]; positive regulation of vasoconstriction [GO:0045907]	Plays a role in the regulation of contractile properties of both striated and smooth muscles. When unphosphorylated, may inhibit myosin dephosphorylation. Phosphorylation at Ser-299 reduces this inhibitory activity (By similarity). {ECO:0000250}.	48953	49
GRIP2_HUMAN	-0.170316	0.0462258	GRIP2	NA	NA	-2.12516	-2.18532	0.03962	0.270572	0.251026	2.35568	20	0.0186794	0.038537	0.0364445
UBC9_HUMAN	-0.170892	0.0120218	UBE2I	NA	NA	-2.7621	-2.78968	0.0105841	0.157154	0.1497	2.35568	20	0.0186794	0.0229676	0.0225157
UBFD1_HUMAN	-0.173235	0.00328669	UBFD1	UBFD1 UBPH	Ubiquitin domain-containing protein UBFD1	-3.33677	-3.30985	0.00313888	0.122032	0.113342	2.35568	20	0.0186794	0.0161722	0.0164364	309	cadherin binding [GO:0045296]; RNA binding [GO:0003723]	cadherin binding [GO:0045296]; RNA binding [GO:0003723]	cadherin binding [GO:0045296]; RNA binding [GO:0003723]	May play a role as NF-kappa-B regulator. {ECO:0000269|PubMed:19285159}.	33382	33
ARHL1_HUMAN	-0.173525	0.0154666	ADPRHL1	ADPRHL1 ARH2	[Protein ADP-ribosylarginine] hydrolase-like protein 1	-2.64701	-2.6863	0.0133749	0.171581	0.159996	2.35568	20	0.0186794	0.0257849	0.0250362	354	endomembrane system [GO:0012505]; intracellular [GO:0005622]; ADP-ribosylarginine hydrolase activity [GO:0003875]; GTPase activator activity [GO:0005096]; magnesium ion binding [GO:0000287]; Rab GTPase binding [GO:0017137]; activation of GTPase activity [GO:0090630]; intracellular protein transport [GO:0006886]; protein de-ADP-ribosylation [GO:0051725]; regulation of vesicle fusion [GO:0031338]	endomembrane system [GO:0012505]; intracellular [GO:0005622]; ADP-ribosylarginine hydrolase activity [GO:0003875]; GTPase activator activity [GO:0005096]; magnesium ion binding [GO:0000287]; Rab GTPase binding [GO:0017137]; activation of GTPase activity [GO:0090630]; intracellular protein transport [GO:0006886]; protein de-ADP-ribosylation [GO:0051725]; regulation of vesicle fusion [GO:0031338]	endomembrane system [GO:0012505]; intracellular [GO:0005622]; ADP-ribosylarginine hydrolase activity [GO:0003875]; GTPase activator activity [GO:0005096]; magnesium ion binding [GO:0000287]; Rab GTPase binding [GO:0017137]; activation of GTPase activity [GO:0090630]; intracellular protein transport [GO:0006886]; protein de-ADP-ribosylation [GO:0051725]; regulation of vesicle fusion [GO:0031338]		40105	40
GMPPB_HUMAN	-0.174039	0.0252337	GMPPB	GMPPB	Mannose-1-phosphate guanyltransferase beta	-2.41871	-2.47118	0.0215466	0.209005	0.193939	2.35568	20	0.0186794	0.0310654	0.0297603	360	cytoplasm [GO:0005737]; extracellular exosome [GO:0070062]; mitochondrion [GO:0005739]; GTP binding [GO:0005525]; mannose-1-phosphate guanylyltransferase activity [GO:0004475]; GDP-mannose biosynthetic process [GO:0009298]	cytoplasm [GO:0005737]; extracellular exosome [GO:0070062]; mitochondrion [GO:0005739]; GTP binding [GO:0005525]; mannose-1-phosphate guanylyltransferase activity [GO:0004475]; GDP-mannose biosynthetic process [GO:0009298]	cytoplasm [GO:0005737]; extracellular exosome [GO:0070062]; mitochondrion [GO:0005739]; GTP binding [GO:0005525]; mannose-1-phosphate guanylyltransferase activity [GO:0004475]; GDP-mannose biosynthetic process [GO:0009298]		39834	40
CHCH5_HUMAN	-0.174826	0.00717789	CHCHD5	NA	NA	-3.99277	-2.76087	0.02365	0.138863	0.201963	2.35568	6	0.0186794	0.00383436	0.00801955
VKORL_HUMAN	-0.178796	0.0203609	VKORC1L1	VKORC1L1	Vitamin K epoxide reductase complex subunit 1-like protein 1	-2.51963	-2.57189	0.0172668	0.187752	0.17705	2.35568	20	0.0186794	0.0302131	0.0289977	176	endoplasmic reticulum [GO:0005783]; endoplasmic reticulum membrane [GO:0005789]; integral component of membrane [GO:0016021]; quinone binding [GO:0048038]; vitamin-K-epoxide reductase (warfarin-sensitive) activity [GO:0047057]; cellular response to oxidative stress [GO:0034599]; peptidyl-glutamic acid carboxylation [GO:0017187]; vitamin K metabolic process [GO:0042373]	endoplasmic reticulum [GO:0005783]; endoplasmic reticulum membrane [GO:0005789]; integral component of membrane [GO:0016021]; quinone binding [GO:0048038]; vitamin-K-epoxide reductase (warfarin-sensitive) activity [GO:0047057]; cellular response to oxidative stress [GO:0034599]; peptidyl-glutamic acid carboxylation [GO:0017187]; vitamin K metabolic process [GO:0042373]	endoplasmic reticulum [GO:0005783]; endoplasmic reticulum membrane [GO:0005789]; integral component of membrane [GO:0016021]; quinone binding [GO:0048038]; vitamin-K-epoxide reductase (warfarin-sensitive) activity [GO:0047057]; cellular response to oxidative stress [GO:0034599]; peptidyl-glutamic acid carboxylation [GO:0017187]; vitamin K metabolic process [GO:0042373]	Involved in vitamin K metabolism. Can reduce inactive vitamin K 2,3-epoxide to active vitamin K (in vitro), and may contribute to vitamin K-mediated protection against oxidative stress. Plays a role in vitamin K-dependent gamma-carboxylation of Glu residues in target proteins. {ECO:0000269|PubMed:21367861, ECO:0000269|PubMed:23928358, ECO:0000269|PubMed:24532791}.	19836	20
AEDO_HUMAN	-0.181532	0.00423782	ADO	ADO C10orf22	2-aminoethanethiol dioxygenase	-3.22591	-3.22878	0.00380677	0.124774	0.113704	2.35568	20	0.0186794	0.019	0.0189662	270	cytosol [GO:0005829]; mitochondrion [GO:0005739]; cysteamine dioxygenase activity [GO:0047800]; metal ion binding [GO:0046872]; oxidation-reduction process [GO:0055114]; sulfur amino acid catabolic process [GO:0000098]	cytosol [GO:0005829]; mitochondrion [GO:0005739]; cysteamine dioxygenase activity [GO:0047800]; metal ion binding [GO:0046872]; oxidation-reduction process [GO:0055114]; sulfur amino acid catabolic process [GO:0000098]	cytosol [GO:0005829]; mitochondrion [GO:0005739]; cysteamine dioxygenase activity [GO:0047800]; metal ion binding [GO:0046872]; oxidation-reduction process [GO:0055114]; sulfur amino acid catabolic process [GO:0000098]		29751	30
NHEJ1_HUMAN	-0.182077	5.3e-05	NHEJ1	NHEJ1 XLF	Non-homologous end-joining factor 1	-5.11291	-4.76097	9.05e-05	0.0520223	0.0544057	2.35568	20	0.0186794	0.00760893	0.00877546	299	DNA ligase IV complex [GO:0032807]; fibrillar center [GO:0001650]; nonhomologous end joining complex [GO:0070419]; nucleoplasm [GO:0005654]; nucleus [GO:0005634]; DNA end binding [GO:0045027]; B cell differentiation [GO:0030183]; central nervous system development [GO:0007417]; double-strand break repair via nonhomologous end joining [GO:0006303]; positive regulation of ligase activity [GO:005135…	DNA ligase IV complex [GO:0032807]; fibrillar center [GO:0001650]; nonhomologous end joining complex [GO:0070419]; nucleoplasm [GO:0005654]; nucleus [GO:0005634]; DNA end binding [GO:0045027]; B cell differentiation [GO:0030183]; central nervous system development [GO:0007417]; double-strand break repair via nonhomologous end joining [GO:0006303]; positive regulation of ligase activity [GO:005135…	DNA ligase IV complex [GO:0032807]; fibrillar center [GO:0001650]; nonhomologous end joining complex [GO:0070419]; nucleoplasm [GO:0005654]; nucleus [GO:0005634]; DNA end binding [GO:0045027]; B cell differentiation [GO:0030183]; central nervous system development [GO:0007417]; double-strand break repair via nonhomologous end joining [GO:0006303]; positive regulation of ligase activity [GO:005135…	DNA repair protein involved in DNA nonhomologous end joining (NHEJ) required for double-strand break (DSB) repair and V(D)J recombination. May serve as a bridge between XRCC4 and the other NHEJ factors located at DNA ends, or may participate in reconfiguration of the end bound NHEJ factors to allow XRCC4 access to the DNA termini. It may act in concert with XRCC6/XRCC5 (Ku) to stimulate XRCC4-med…	33337	33
CAV3_HUMAN	-0.182275	0.00910878	CAV3	CAV3	Caveolin-3	-2.88728	-2.92116	0.00782771	0.142242	0.132983	2.35568	20	0.0186794	0.0239126	0.0233612	151	caveola [GO:0005901]; cell surface [GO:0009986]; dystrophin-associated glycoprotein complex [GO:0016010]; endoplasmic reticulum [GO:0005783]; Golgi membrane [GO:0000139]; intercalated disc [GO:0014704]; intracellular membrane-bounded organelle [GO:0043231]; membrane raft [GO:0045121]; neuromuscular junction [GO:0031594]; plasma membrane [GO:0005886]; sarcolemma [GO:0042383]; T-tubule [GO:0030315]…	caveola [GO:0005901]; cell surface [GO:0009986]; dystrophin-associated glycoprotein complex [GO:0016010]; endoplasmic reticulum [GO:0005783]; Golgi membrane [GO:0000139]; intercalated disc [GO:0014704]; intracellular membrane-bounded organelle [GO:0043231]; membrane raft [GO:0045121]; neuromuscular junction [GO:0031594]; plasma membrane [GO:0005886]; sarcolemma [GO:0042383]; T-tubule [GO:0030315]…	caveola [GO:0005901]; cell surface [GO:0009986]; dystrophin-associated glycoprotein complex [GO:0016010]; endoplasmic reticulum [GO:0005783]; Golgi membrane [GO:0000139]; intercalated disc [GO:0014704]; intracellular membrane-bounded organelle [GO:0043231]; membrane raft [GO:0045121]; neuromuscular junction [GO:0031594]; plasma membrane [GO:0005886]; sarcolemma [GO:0042383]; T-tubule [GO:0030315]…	May act as a scaffolding protein within caveolar membranes. Interacts directly with G-protein alpha subunits and can functionally regulate their activity. May also regulate voltage-gated potassium channels. Plays a role in the sarcolemma repair mechanism of both skeletal muscle and cardiomyocytes that permits rapid resealing of membranes disrupted by mechanical stress.	17259	17
CAH3_HUMAN	-0.183746	0.0394415	CA3	CA3	Carbonic anhydrase 3	-2.20356	-2.27062	0.0331416	0.253469	0.232477	2.35568	20	0.0186794	0.0417193	0.0392915	260	cytosol [GO:0005829]; carbonate dehydratase activity [GO:0004089]; nickel cation binding [GO:0016151]; phosphatase activity [GO:0016791]; zinc ion binding [GO:0008270]; bicarbonate transport [GO:0015701]; one-carbon metabolic process [GO:0006730]; response to ethanol [GO:0045471]; response to oxidative stress [GO:0006979]	cytosol [GO:0005829]; carbonate dehydratase activity [GO:0004089]; nickel cation binding [GO:0016151]; phosphatase activity [GO:0016791]; zinc ion binding [GO:0008270]; bicarbonate transport [GO:0015701]; one-carbon metabolic process [GO:0006730]; response to ethanol [GO:0045471]; response to oxidative stress [GO:0006979]	cytosol [GO:0005829]; carbonate dehydratase activity [GO:0004089]; nickel cation binding [GO:0016151]; phosphatase activity [GO:0016791]; zinc ion binding [GO:0008270]; bicarbonate transport [GO:0015701]; one-carbon metabolic process [GO:0006730]; response to ethanol [GO:0045471]; response to oxidative stress [GO:0006979]	Reversible hydration of carbon dioxide.	29557	30
FUCO_HUMAN	-0.185229	0.0334944	FUCA1	NA	NA	-2.28317	-2.34933	0.0280377	0.235449	0.217957	2.35568	20	0.0186794	0.0394905	0.0372976
PEBB_HUMAN	-0.186554	0.0189049	CBFB	CBFB	Core-binding factor subunit beta	-2.55421	-2.61216	0.0157894	0.183709	0.171515	2.35568	20	0.0186794	0.0320073	0.0306029	182	membrane [GO:0016020]; nucleus [GO:0005634]; DNA binding [GO:0003677]; transcription coactivator activity [GO:0003713]; transcription factor activity, sequence-specific DNA binding [GO:0003700]; cell maturation [GO:0048469]; definitive hemopoiesis [GO:0060216]; lymphocyte differentiation [GO:0030098]; myeloid cell differentiation [GO:0030099]; osteoblast differentiation [GO:0001649]; positive reg…	membrane [GO:0016020]; nucleus [GO:0005634]; DNA binding [GO:0003677]; transcription coactivator activity [GO:0003713]; transcription factor activity, sequence-specific DNA binding [GO:0003700]; cell maturation [GO:0048469]; definitive hemopoiesis [GO:0060216]; lymphocyte differentiation [GO:0030098]; myeloid cell differentiation [GO:0030099]; osteoblast differentiation [GO:0001649]; positive reg…	membrane [GO:0016020]; nucleus [GO:0005634]; DNA binding [GO:0003677]; transcription coactivator activity [GO:0003713]; transcription factor activity, sequence-specific DNA binding [GO:0003700]; cell maturation [GO:0048469]; definitive hemopoiesis [GO:0060216]; lymphocyte differentiation [GO:0030098]; myeloid cell differentiation [GO:0030099]; osteoblast differentiation [GO:0001649]; positive reg…	CBF binds to the core site, 5'-PYGPYGGT-3', of a number of enhancers and promoters, including murine leukemia virus, polyomavirus enhancer, T-cell receptor enhancers, LCK, IL3 and GM-CSF promoters. CBFB enhances DNA binding by RUNX1.	21508	22
ABEC2_HUMAN	-0.187088	0.00177513	APOBEC2	APOBEC2	C->U-editing enzyme APOBEC-2	-3.60319	-3.57417	0.00166225	0.112467	0.108611	2.35568	20	0.0186794	0.0161758	0.0164397	224	cytidine deaminase activity [GO:0004126]; RNA binding [GO:0003723]; zinc ion binding [GO:0008270]; cytidine to uridine editing [GO:0016554]; DNA demethylation [GO:0080111]; mRNA modification [GO:0016556]; mRNA processing [GO:0006397]	cytidine deaminase activity [GO:0004126]; RNA binding [GO:0003723]; zinc ion binding [GO:0008270]; cytidine to uridine editing [GO:0016554]; DNA demethylation [GO:0080111]; mRNA modification [GO:0016556]; mRNA processing [GO:0006397]	cytidine deaminase activity [GO:0004126]; RNA binding [GO:0003723]; zinc ion binding [GO:0008270]; cytidine to uridine editing [GO:0016554]; DNA demethylation [GO:0080111]; mRNA modification [GO:0016556]; mRNA processing [GO:0006397]	Probable C to U editing enzyme whose physiological substrate is not yet known. Does not display detectable apoB mRNA editing. Has a low intrinsic cytidine deaminase activity. May play a role in the epigenetic regulation of gene expression through the process of active DNA demethylation. {ECO:0000269|PubMed:17187054, ECO:0000269|PubMed:21496894}.	25703	26
NUP62_HUMAN	-0.187173	0.00726602	NUP62	NUP62	Nuclear pore glycoprotein p62	-2.98822	-3.02127	0.00620424	0.138863	0.130026	2.35568	20	0.0186794	0.0235404	0.0230282	522	annulate lamellae [GO:0005642]; centrosome [GO:0005813]; cytoplasm [GO:0005737]; Flemming body [GO:0090543]; intracellular membrane-bounded organelle [GO:0043231]; intracellular ribonucleoprotein complex [GO:0030529]; mitotic spindle [GO:0072686]; nuclear envelope [GO:0005635]; nuclear membrane [GO:0031965]; nuclear pore [GO:0005643]; nuclear pore central transport channel [GO:0044613]; nucleocyt…	annulate lamellae [GO:0005642]; centrosome [GO:0005813]; cytoplasm [GO:0005737]; Flemming body [GO:0090543]; intracellular membrane-bounded organelle [GO:0043231]; intracellular ribonucleoprotein complex [GO:0030529]; mitotic spindle [GO:0072686]; nuclear envelope [GO:0005635]; nuclear membrane [GO:0031965]; nuclear pore [GO:0005643]; nuclear pore central transport channel [GO:0044613]; nucleocyt…	annulate lamellae [GO:0005642]; centrosome [GO:0005813]; cytoplasm [GO:0005737]; Flemming body [GO:0090543]; intracellular membrane-bounded organelle [GO:0043231]; intracellular ribonucleoprotein complex [GO:0030529]; mitotic spindle [GO:0072686]; nuclear envelope [GO:0005635]; nuclear membrane [GO:0031965]; nuclear pore [GO:0005643]; nuclear pore central transport channel [GO:0044613]; nucleocyt…	Essential component of the nuclear pore complex (PubMed:1915414). The N-terminal is probably involved in nucleocytoplasmic transport (PubMed:1915414). The C-terminal is involved in protein-protein interaction probably via coiled-coil formation, promotes its association with centrosomes and may function in anchorage of p62 to the pore complex (PubMed:1915414, PubMed:24107630). Plays a role in mito…	53255	53
GNAO_HUMAN	-0.187866	0.0282638	GNAO1	GNAO1	Guanine nucleotide-binding protein G	-2.46757	-2.5052	0.0239479	0.216883	0.202752	2.35568	13	0.0186794	0.0231857	0.0224944	354	cell body [GO:0044297]; dendrite [GO:0030425]; heterotrimeric G-protein complex [GO:0005834]; myelin sheath [GO:0043209]; plasma membrane [GO:0005886]; corticotropin-releasing hormone receptor 1 binding [GO:0051430]; G-protein beta/gamma-subunit complex binding [GO:0031683]; G-protein coupled serotonin receptor binding [GO:0031821]; GTP binding [GO:0005525]; GTPase activating protein binding [GO:…	cell body [GO:0044297]; dendrite [GO:0030425]; heterotrimeric G-protein complex [GO:0005834]; myelin sheath [GO:0043209]; plasma membrane [GO:0005886]; corticotropin-releasing hormone receptor 1 binding [GO:0051430]; G-protein beta/gamma-subunit complex binding [GO:0031683]; G-protein coupled serotonin receptor binding [GO:0031821]; GTP binding [GO:0005525]; GTPase activating protein binding [GO:…	cell body [GO:0044297]; dendrite [GO:0030425]; heterotrimeric G-protein complex [GO:0005834]; myelin sheath [GO:0043209]; plasma membrane [GO:0005886]; corticotropin-releasing hormone receptor 1 binding [GO:0051430]; G-protein beta/gamma-subunit complex binding [GO:0031683]; G-protein coupled serotonin receptor binding [GO:0031821]; GTP binding [GO:0005525]; GTPase activating protein binding [GO:…	Guanine nucleotide-binding proteins (G proteins) are involved as modulators or transducers in various transmembrane signaling systems. The G(o) protein function is not clear. Stimulated by RGS14.	40051	40
ANGI_HUMAN	-0.190308	0.0165064	ANG	NA	NA	-2.61704	-2.67566	0.0136985	0.175569	0.161063	2.35568	20	0.0186794	0.031728	0.0303531
AR6P6_HUMAN	-0.190321	0.0398612	ARL6IP6	NA	NA	-2.28348	-2.34315	0.032967	0.255163	0.232116	2.35568	13	0.0186794	0.0277868	0.0263896
E41L3_HUMAN	-0.190396	0.0432831	EPB41L3	EPB41L3 DAL1 KIAA0987	Band 4.1-like protein 3	-2.15779	-2.22943	0.0361384	0.263318	0.240368	2.35568	20	0.0186794	0.0467145	0.0437604	1087	axolemma [GO:0030673]; cell-cell junction [GO:0005911]; cytoskeleton [GO:0005856]; cytosol [GO:0005829]; extrinsic component of membrane [GO:0019898]; juxtaparanode region of axon [GO:0044224]; paranode region of axon [GO:0033270]; plasma membrane [GO:0005886]; postsynaptic density [GO:0014069]; actin binding [GO:0003779]; structural constituent of cytoskeleton [GO:0005200]; actomyosin structure …	axolemma [GO:0030673]; cell-cell junction [GO:0005911]; cytoskeleton [GO:0005856]; cytosol [GO:0005829]; extrinsic component of membrane [GO:0019898]; juxtaparanode region of axon [GO:0044224]; paranode region of axon [GO:0033270]; plasma membrane [GO:0005886]; postsynaptic density [GO:0014069]; actin binding [GO:0003779]; structural constituent of cytoskeleton [GO:0005200]; actomyosin structure …	axolemma [GO:0030673]; cell-cell junction [GO:0005911]; cytoskeleton [GO:0005856]; cytosol [GO:0005829]; extrinsic component of membrane [GO:0019898]; juxtaparanode region of axon [GO:0044224]; paranode region of axon [GO:0033270]; plasma membrane [GO:0005886]; postsynaptic density [GO:0014069]; actin binding [GO:0003779]; structural constituent of cytoskeleton [GO:0005200]; actomyosin structure …	Tumor suppressor that inhibits cell proliferation and promotes apoptosis. Modulates the activity of protein arginine N-methyltransferases, including PRMT3 and PRMT5. {ECO:0000269|PubMed:15334060, ECO:0000269|PubMed:15737618, ECO:0000269|PubMed:16420693, ECO:0000269|PubMed:9892180}.	120678	121
MYL1_HUMAN	-0.191156	0.0414917	MYL1	MYL1	Myosin light chain 1/3, skeletal muscle isoform	-2.17865	-2.25041	0.0345822	0.258842	0.234172	2.35568	20	0.0186794	0.0461904	0.0432915	194	cytosol [GO:0005829]; muscle myosin complex [GO:0005859]; myofibril [GO:0030016]; sarcomere [GO:0030017]; calcium ion binding [GO:0005509]; structural constituent of muscle [GO:0008307]; cardiac muscle contraction [GO:0060048]; muscle contraction [GO:0006936]; muscle filament sliding [GO:0030049]	cytosol [GO:0005829]; muscle myosin complex [GO:0005859]; myofibril [GO:0030016]; sarcomere [GO:0030017]; calcium ion binding [GO:0005509]; structural constituent of muscle [GO:0008307]; cardiac muscle contraction [GO:0060048]; muscle contraction [GO:0006936]; muscle filament sliding [GO:0030049]	cytosol [GO:0005829]; muscle myosin complex [GO:0005859]; myofibril [GO:0030016]; sarcomere [GO:0030017]; calcium ion binding [GO:0005509]; structural constituent of muscle [GO:0008307]; cardiac muscle contraction [GO:0060048]; muscle contraction [GO:0006936]; muscle filament sliding [GO:0030049]	Regulatory light chain of myosin. Does not bind calcium.	21145	21
H33_HUMAN	-0.192179	0.00406481	H3F3A; H3F3B	H3F3A H3.3A H3F3 PP781; H3F3B H3.3B	Histone H3.3	-3.24414	-3.2636	0.00350453	0.123391	0.113342	2.35568	20	0.0186794	0.0210555	0.0208052	136	Barr body [GO:0001740]; extracellular exosome [GO:0070062]; extracellular region [GO:0005576]; nuclear chromosome [GO:0000228]; nuclear chromosome, telomeric region [GO:0000784]; nuclear nucleosome [GO:0000788]; nucleoplasm [GO:0005654]; nucleosome [GO:0000786]; nucleus [GO:0005634]; protein complex [GO:0043234]; histone binding [GO:0042393]; nucleosomal DNA binding [GO:0031492]; protein heterodi…	Barr body [GO:0001740]; extracellular exosome [GO:0070062]; extracellular region [GO:0005576]; nuclear chromosome [GO:0000228]; nuclear chromosome, telomeric region [GO:0000784]; nuclear nucleosome [GO:0000788]; nucleoplasm [GO:0005654]; nucleosome [GO:0000786]; nucleus [GO:0005634]; protein complex [GO:0043234]; histone binding [GO:0042393]; nucleosomal DNA binding [GO:0031492]; protein heterodi…	Barr body [GO:0001740]; extracellular exosome [GO:0070062]; extracellular region [GO:0005576]; nuclear chromosome [GO:0000228]; nuclear chromosome, telomeric region [GO:0000784]; nuclear nucleosome [GO:0000788]; nucleoplasm [GO:0005654]; nucleosome [GO:0000786]; nucleus [GO:0005634]; protein complex [GO:0043234]; histone binding [GO:0042393]; nucleosomal DNA binding [GO:0031492]; protein heterodi…	Variant histone H3 which replaces conventional H3 in a wide range of nucleosomes in active genes. Constitutes the predominant form of histone H3 in non-dividing cells and is incorporated into chromatin independently of DNA synthesis. Deposited at sites of nucleosomal displacement throughout transcribed genes, suggesting that it represents an epigenetic imprint of transcriptionally active chromati…	15328	15
AT2A1_HUMAN	-0.192721	0.0392934	ATP2A1	ATP2A1	Sarcoplasmic/endoplasmic reticulum calcium ATPase 1	-2.2054	-2.27763	0.0326548	0.253148	0.230593	2.35568	20	0.0186794	0.0458175	0.0429578	1001	calcium channel complex [GO:0034704]; endoplasmic reticulum membrane [GO:0005789]; endoplasmic reticulum-Golgi intermediate compartment [GO:0005793]; H zone [GO:0031673]; I band [GO:0031674]; integral component of membrane [GO:0016021]; membrane [GO:0016020]; mitochondrion [GO:0005739]; perinuclear region of cytoplasm [GO:0048471]; platelet dense tubular network membrane [GO:0031095]; sarcoplasmi…	calcium channel complex [GO:0034704]; endoplasmic reticulum membrane [GO:0005789]; endoplasmic reticulum-Golgi intermediate compartment [GO:0005793]; H zone [GO:0031673]; I band [GO:0031674]; integral component of membrane [GO:0016021]; membrane [GO:0016020]; mitochondrion [GO:0005739]; perinuclear region of cytoplasm [GO:0048471]; platelet dense tubular network membrane [GO:0031095]; sarcoplasmi…	calcium channel complex [GO:0034704]; endoplasmic reticulum membrane [GO:0005789]; endoplasmic reticulum-Golgi intermediate compartment [GO:0005793]; H zone [GO:0031673]; I band [GO:0031674]; integral component of membrane [GO:0016021]; membrane [GO:0016020]; mitochondrion [GO:0005739]; perinuclear region of cytoplasm [GO:0048471]; platelet dense tubular network membrane [GO:0031095]; sarcoplasmi…	Key regulator of striated muscle performance by acting as the major Ca(2+) ATPase responsible for the reuptake of cytosolic Ca(2+) into the sarcoplasmic reticulum. Catalyzes the hydrolysis of ATP coupled with the translocation of calcium from the cytosol to the sarcoplasmic reticulum lumen. Contributes to calcium sequestration involved in muscular excitation/contraction. {ECO:0000250|UniProtKB:Q8…	110252	110
HMGA1_HUMAN	-0.193992	0.00297983	HMGA1	HMGA1 HMGIY	High mobility group protein HMG-I/HMG-Y	-3.37936	-3.38924	0.00259589	0.122032	0.112849	2.35568	20	0.0186794	0.0197719	0.0196568	107	cytosol [GO:0005829]; focal adhesion [GO:0005925]; nucleoplasm [GO:0005654]; nucleus [GO:0005634]; RNA polymerase II transcription factor complex [GO:0090575]; senescence-associated heterochromatin focus [GO:0035985]; transcription factor complex [GO:0005667]; 5'-deoxyribose-5-phosphate lyase activity [GO:0051575]; AT DNA binding [GO:0003680]; chromatin binding [GO:0003682]; DNA binding [GO:00036…	cytosol [GO:0005829]; focal adhesion [GO:0005925]; nucleoplasm [GO:0005654]; nucleus [GO:0005634]; RNA polymerase II transcription factor complex [GO:0090575]; senescence-associated heterochromatin focus [GO:0035985]; transcription factor complex [GO:0005667]; 5'-deoxyribose-5-phosphate lyase activity [GO:0051575]; AT DNA binding [GO:0003680]; chromatin binding [GO:0003682]; DNA binding [GO:00036…	cytosol [GO:0005829]; focal adhesion [GO:0005925]; nucleoplasm [GO:0005654]; nucleus [GO:0005634]; RNA polymerase II transcription factor complex [GO:0090575]; senescence-associated heterochromatin focus [GO:0035985]; transcription factor complex [GO:0005667]; 5'-deoxyribose-5-phosphate lyase activity [GO:0051575]; AT DNA binding [GO:0003680]; chromatin binding [GO:0003682]; DNA binding [GO:00036…	HMG-I/Y bind preferentially to the minor groove of A+T rich regions in double-stranded DNA. It is suggested that these proteins could function in nucleosome phasing and in the 3'-end processing of mRNA transcripts. They are also involved in the transcription regulation of genes containing, or in close proximity to A+T-rich regions.	11676	12
CELF2_HUMAN	-0.196146	0.0120787	CELF2	NA	NA	-2.75996	-2.81749	0.00993349	0.157154	0.146759	2.35568	20	0.0186794	0.0303043	0.0290794
NCAM1_HUMAN	-0.19946	0.0435724	NCAM1	NCAM1 NCAM	Neural cell adhesion molecule 1	-2.15449	-2.23062	0.0360481	0.263318	0.2401	2.35568	20	0.0186794	0.051425	0.0479745	858	anchored component of membrane [GO:0031225]; cell surface [GO:0009986]; cytosol [GO:0005829]; external side of plasma membrane [GO:0009897]; extracellular exosome [GO:0070062]; Golgi membrane [GO:0000139]; integral component of membrane [GO:0016021]; membrane [GO:0016020]; plasma membrane [GO:0005886]; identical protein binding [GO:0042802]; Ras guanyl-nucleotide exchange factor activity [GO:0005…	anchored component of membrane [GO:0031225]; cell surface [GO:0009986]; cytosol [GO:0005829]; external side of plasma membrane [GO:0009897]; extracellular exosome [GO:0070062]; Golgi membrane [GO:0000139]; integral component of membrane [GO:0016021]; membrane [GO:0016020]; plasma membrane [GO:0005886]; identical protein binding [GO:0042802]; Ras guanyl-nucleotide exchange factor activity [GO:0005…	anchored component of membrane [GO:0031225]; cell surface [GO:0009986]; cytosol [GO:0005829]; external side of plasma membrane [GO:0009897]; extracellular exosome [GO:0070062]; Golgi membrane [GO:0000139]; integral component of membrane [GO:0016021]; membrane [GO:0016020]; plasma membrane [GO:0005886]; identical protein binding [GO:0042802]; Ras guanyl-nucleotide exchange factor activity [GO:0005…	This protein is a cell adhesion molecule involved in neuron-neuron adhesion, neurite fasciculation, outgrowth of neurites, etc.; (Microbial infection) Acts as a receptor for rabies virus. {ECO:0000269|PubMed:9696812}.	94574	95
AAKG3_HUMAN	-0.202507	0.0326657	PRKAG3	PRKAG3 AMPKG3	5'-AMP-activated protein kinase subunit gamma-3	-2.29527	-2.37147	0.026738	0.233148	0.212636	2.35568	20	0.0186794	0.046705	0.0437519	489	cytosol [GO:0005829]; extracellular space [GO:0005615]; nucleoplasm [GO:0005654]; nucleotide-activated protein kinase complex [GO:0031588]; AMP-activated protein kinase activity [GO:0004679]; ATP binding [GO:0005524]; protein kinase binding [GO:0019901]; cell cycle arrest [GO:0007050]; fatty acid biosynthetic process [GO:0006633]; glucose transport [GO:0015758]; glycogen biosynthetic process [GO:…	cytosol [GO:0005829]; extracellular space [GO:0005615]; nucleoplasm [GO:0005654]; nucleotide-activated protein kinase complex [GO:0031588]; AMP-activated protein kinase activity [GO:0004679]; ATP binding [GO:0005524]; protein kinase binding [GO:0019901]; cell cycle arrest [GO:0007050]; fatty acid biosynthetic process [GO:0006633]; glucose transport [GO:0015758]; glycogen biosynthetic process [GO:…	cytosol [GO:0005829]; extracellular space [GO:0005615]; nucleoplasm [GO:0005654]; nucleotide-activated protein kinase complex [GO:0031588]; AMP-activated protein kinase activity [GO:0004679]; ATP binding [GO:0005524]; protein kinase binding [GO:0019901]; cell cycle arrest [GO:0007050]; fatty acid biosynthetic process [GO:0006633]; glucose transport [GO:0015758]; glycogen biosynthetic process [GO:…	AMP/ATP-binding subunit of AMP-activated protein kinase (AMPK), an energy sensor protein kinase that plays a key role in regulating cellular energy metabolism. In response to reduction of intracellular ATP levels, AMPK activates energy-producing pathways and inhibits energy-consuming processes: inhibits protein, carbohydrate and lipid biosynthesis, as well as cell growth and proliferation. AMPK a…	54258	54
TRIM7_HUMAN	-0.203447	0.0113369	TRIM7	TRIM7 GNIP RNF90	Tripartite motif-containing protein 7	-2.78869	-2.85175	0.00918408	0.155277	0.141556	2.35568	20	0.0186794	0.0319339	0.0305373	511	cytoplasm [GO:0005737]; nucleus [GO:0005634]; zinc ion binding [GO:0008270]	cytoplasm [GO:0005737]; nucleus [GO:0005634]; zinc ion binding [GO:0008270]	cytoplasm [GO:0005737]; nucleus [GO:0005634]; zinc ion binding [GO:0008270]		56631	57
CPSF3_HUMAN	-0.204147	0.00650904	CPSF3	NA	NA	-3.23536	-3.19329	0.00590055	0.138767	0.130026	2.35568	13	0.0186794	0.0159257	0.0163481
TE2IP_HUMAN	-0.205337	0.00174242	TERF2IP	NA	NA	-3.6112	-3.61828	0.00149369	0.112467	0.108611	2.35568	20	0.0186794	0.0193992	0.0193233
TCEA3_HUMAN	-0.205743	0.00350961	TCEA3	TCEA3 TFIISH	Transcription elongation factor A protein 3	-3.30821	-3.34275	0.00290162	0.12239	0.113342	2.35568	20	0.0186794	0.0232067	0.0227297	348	nucleus [GO:0005634]; DNA binding [GO:0003677]; zinc ion binding [GO:0008270]; regulation of transcription, DNA-templated [GO:0006355]; transcription, DNA-templated [GO:0006351]	nucleus [GO:0005634]; DNA binding [GO:0003677]; zinc ion binding [GO:0008270]; regulation of transcription, DNA-templated [GO:0006355]; transcription, DNA-templated [GO:0006351]	nucleus [GO:0005634]; DNA binding [GO:0003677]; zinc ion binding [GO:0008270]; regulation of transcription, DNA-templated [GO:0006355]; transcription, DNA-templated [GO:0006351]	Necessary for efficient RNA polymerase II transcription elongation past template-encoded arresting sites. The arresting sites in DNA have the property of trapping a certain fraction of elongating RNA polymerases that pass through, resulting in locked ternary complexes. Cleavage of the nascent transcript by S-II allows the resumption of elongation from the new 3'-terminus.	38972	39
DUPD1_HUMAN	-0.207372	0.00191242	DUPD1	DUPD1 DUSP27	Dual specificity phosphatase DUPD1	-3.57111	-3.58564	0.0016167	0.112467	0.108611	2.35568	20	0.0186794	0.0202323	0.0200687	220	cytoplasm [GO:0005737]; protein tyrosine phosphatase activity [GO:0004725]; protein tyrosine/serine/threonine phosphatase activity [GO:0008138]	cytoplasm [GO:0005737]; protein tyrosine phosphatase activity [GO:0004725]; protein tyrosine/serine/threonine phosphatase activity [GO:0008138]	cytoplasm [GO:0005737]; protein tyrosine phosphatase activity [GO:0004725]; protein tyrosine/serine/threonine phosphatase activity [GO:0008138]		25336	25
HS71L_HUMAN	-0.2083	0.00425735	HSPA1L	HSPA1L	Heat shock 70 kDa protein 1-like	-3.2239	-3.26797	0.00346826	0.124774	0.113342	2.35568	20	0.0186794	0.0250475	0.0243765	641	blood microparticle [GO:0072562]; cell body [GO:0044297]; cytosol [GO:0005829]; mitochondrial matrix [GO:0005759]; nucleoplasm [GO:0005654]; zona pellucida receptor complex [GO:0002199]; ATP binding [GO:0005524]; heat shock protein binding [GO:0031072]; ubiquitin protein ligase binding [GO:0031625]; unfolded protein binding [GO:0051082]; binding of sperm to zona pellucida [GO:0007339]; positive r…	blood microparticle [GO:0072562]; cell body [GO:0044297]; cytosol [GO:0005829]; mitochondrial matrix [GO:0005759]; nucleoplasm [GO:0005654]; zona pellucida receptor complex [GO:0002199]; ATP binding [GO:0005524]; heat shock protein binding [GO:0031072]; ubiquitin protein ligase binding [GO:0031625]; unfolded protein binding [GO:0051082]; binding of sperm to zona pellucida [GO:0007339]; positive r…	blood microparticle [GO:0072562]; cell body [GO:0044297]; cytosol [GO:0005829]; mitochondrial matrix [GO:0005759]; nucleoplasm [GO:0005654]; zona pellucida receptor complex [GO:0002199]; ATP binding [GO:0005524]; heat shock protein binding [GO:0031072]; ubiquitin protein ligase binding [GO:0031625]; unfolded protein binding [GO:0051082]; binding of sperm to zona pellucida [GO:0007339]; positive r…	Molecular chaperone implicated in a wide variety of cellular processes, including protection of the proteome from stress, folding and transport of newly synthesized polypeptides, activation of proteolysis of misfolded proteins and the formation and dissociation of protein complexes. Plays a pivotal role in the protein quality control system, ensuring the correct folding of proteins, the re-foldin…	70375	70
CDS2_HUMAN	-0.215725	0.00372978	CDS2	CDS2	Phosphatidate cytidylyltransferase 2	-3.28169	-3.33112	0.0029834	0.122742	0.113342	2.35568	20	0.0186794	0.0259273	0.0251636	445	endoplasmic reticulum membrane [GO:0005789]; integral component of membrane [GO:0016021]; membrane [GO:0016020]; mitochondrial inner membrane [GO:0005743]; phosphatidate cytidylyltransferase activity [GO:0004605]; CDP-diacylglycerol biosynthetic process [GO:0016024]; phosphatidylglycerol biosynthetic process [GO:0006655]	endoplasmic reticulum membrane [GO:0005789]; integral component of membrane [GO:0016021]; membrane [GO:0016020]; mitochondrial inner membrane [GO:0005743]; phosphatidate cytidylyltransferase activity [GO:0004605]; CDP-diacylglycerol biosynthetic process [GO:0016024]; phosphatidylglycerol biosynthetic process [GO:0006655]	endoplasmic reticulum membrane [GO:0005789]; integral component of membrane [GO:0016021]; membrane [GO:0016020]; mitochondrial inner membrane [GO:0005743]; phosphatidate cytidylyltransferase activity [GO:0004605]; CDP-diacylglycerol biosynthetic process [GO:0016024]; phosphatidylglycerol biosynthetic process [GO:0006655]	Provides CDP-diacylglycerol, an important precursor for the synthesis of phosphatidylinositol, phosphatidylglycerol, and cardiolipin.	51418	51
IRF3_HUMAN	-0.216536	0.0373902	IRF3	NA	NA	-2.66268	-2.52025	0.0346225	0.24818	0.234172	2.35568	6	0.0186794	0.0132268	0.014764
[truncated: 46 more rows]

## Sheet: Overrepresented_MA-p<0.05
Overrepresented proteins in Master Athletes (p<0.05)
ProteinID	log2FC	p.ord	GenePrimary	Genenames	ProteinDesc.1	t.ord	t.mod	p.mod	q.ord	q.mod	df.0	df.r	s2.0	s2	s2.post	Length.y	GOCC	GOMF	GOBP	Function	Pathway	Mass	MassKDa
[truncated: 544 more rows]
