# Supplementary material for: Unbiased proteomics, histochemistry, and mitochondrial DNA copy number reveal better mitochondrial health in muscle of high-functioning octogenarians
Source: eLife. 2022 Apr 11;11:e74335. doi: 10.7554/eLife.74335 (PMC9090325; doi:10.7554/eLife.74335)
Supplement: Supplementary file 3. [file elife-74335-supp3.xlsx]

## Sheet: MA_UniqueProteome (MA-)
MasterAthlete Exclusive Proteome (Underrepresented)
ProteinID	Underrepresented	log2FC	p.ord	GenePrimary	Genenames	ProteinDesc.1	t.ord	t.mod	p.mod	q.ord	q.mod	df.0	df.r	s2.0	s2	s2.post	Length.y	GOCC	GOMF	GOBP	Keywords.y	Function	Mass	MassKDa
ZBT40_HUMAN	TRUE	-0.473543	0.0198861	ZBTB40	NA	NA	-3.14717	-3.44539	0.00819357	0.187013	0.134939	2.35568	6	0.0186794	0.0452804	0.0377809	NA	NA	NA	NA	NA	NA	NA	NA
XK_HUMAN	TRUE	-0.143867	0.00337426	XK	NA	NA	-4.68616	-2.50066	0.035717	0.122032	0.238887	2.35568	6	0.0186794	0.00188503	0.00661979	NA	NA	NA	NA	NA	NA	NA	NA
WDR26_HUMAN	TRUE	-0.0762353	0.0288979	WDR26	WDR26 CDW2 MIP2 PRO0852	WD repeat-containing protein 26	-2.35417	-2.14241	0.0432951	0.220347	0.26156	2.35568	20	0.0186794	0.00629198	0.00759727	661	cytoplasm [GO:0005737]; cytosol [GO:0005829]; nucleoplasm [GO:0005654]	cytoplasm [GO:0005737]; cytosol [GO:0005829]; nucleoplasm [GO:0005654]	cytoplasm [GO:0005737]; cytosol [GO:0005829]; nucleoplasm [GO:0005654]	Alternative splicing; Complete proteome; Cytoplasm; Phosphoprotein; Reference proteome; Repeat; WD repeat	May be involved in MAPK pathways. {ECO:0000269|PubMed:15378603}.	72124	72
WDR24_HUMAN	TRUE	-0.30728	0.0376741	WDR24	NA	NA	-2.65701	-2.77776	0.0230279	0.24818	0.19953	2.35568	6	0.0186794	0.0267493	0.0244742	NA	NA	NA	NA	NA	NA	NA	NA
WDR13_HUMAN	TRUE	-0.130469	0.0269436	WDR13	WDR13	WD repeat-containing protein 13	-2.38758	-2.38224	0.0261262	0.214473	0.209561	2.35568	20	0.0186794	0.0179164	0.0179968	485	microtubule organizing center [GO:0005815]; nucleoplasm [GO:0005654]; plasma membrane [GO:0005886]; promoter-specific chromatin binding [GO:1990841]; negative regulation of type B pancreatic cell proliferation [GO:1904691]	microtubule organizing center [GO:0005815]; nucleoplasm [GO:0005654]; plasma membrane [GO:0005886]; promoter-specific chromatin binding [GO:1990841]; negative regulation of type B pancreatic cell proliferation [GO:1904691]	microtubule organizing center [GO:0005815]; nucleoplasm [GO:0005654]; plasma membrane [GO:0005886]; promoter-specific chromatin binding [GO:1990841]; negative regulation of type B pancreatic cell proliferation [GO:1904691]	Acetylation; Alternative splicing; Complete proteome; Methylation; Nucleus; Phosphoprotein; Polymorphism; Reference proteome; Repeat; WD repeat		53696	54
WASC3_HUMAN	TRUE	-0.223261	0.0411818	WASHC3	NA	NA	-2.26587	-2.36184	0.0317825	0.257564	0.228863	2.35568	13	0.0186794	0.0388344	0.0357425	NA	NA	NA	NA	NA	NA	NA	NA
VPS51_HUMAN	TRUE	-0.0990527	0.0423826	VPS51	VPS51 ANG2 C11orf2 C11orf3 FFR PP5382	Vacuolar protein sorting-associated protein 51 homolog	-2.16817	-2.1141	0.0458854	0.261043	0.267688	2.35568	20	0.0186794	0.0125226	0.0131714	782	cytosol [GO:0005829]; EARP complex [GO:1990745]; GARP complex [GO:0000938]; Golgi apparatus [GO:0005794]; integral component of membrane [GO:0016021]; intracellular membrane-bounded organelle [GO:0043231]; membrane [GO:0016020]; nucleolus [GO:0005730]; recycling endosome [GO:0055037]; trans-Golgi network [GO:0005802]; trans-Golgi network membrane [GO:0032588]; autophagy [GO:0006914]; endocytic re…	cytosol [GO:0005829]; EARP complex [GO:1990745]; GARP complex [GO:0000938]; Golgi apparatus [GO:0005794]; integral component of membrane [GO:0016021]; intracellular membrane-bounded organelle [GO:0043231]; membrane [GO:0016020]; nucleolus [GO:0005730]; recycling endosome [GO:0055037]; trans-Golgi network [GO:0005802]; trans-Golgi network membrane [GO:0032588]; autophagy [GO:0006914]; endocytic re…	cytosol [GO:0005829]; EARP complex [GO:1990745]; GARP complex [GO:0000938]; Golgi apparatus [GO:0005794]; integral component of membrane [GO:0016021]; intracellular membrane-bounded organelle [GO:0043231]; membrane [GO:0016020]; nucleolus [GO:0005730]; recycling endosome [GO:0055037]; trans-Golgi network [GO:0005802]; trans-Golgi network membrane [GO:0032588]; autophagy [GO:0006914]; endocytic re…	3D-structure; Acetylation; Alternative splicing; Coiled coil; Complete proteome; Endosome; Golgi apparatus; Lipid transport; Phosphoprotein; Protein transport; Reference proteome; Transport	Acts as component of the GARP complex that is involved in retrograde transport from early and late endosomes to the trans-Golgi network (TGN). The GARP complex is required for the maintenance of protein retrieval from endosomes to the TGN, acid hydrolase sorting, lysosome function, endosomal cholesterol traffic and autophagy. VPS51 participates in retrograde transport of acid hydrolase receptors,…	86042	86
VPS4A_HUMAN	TRUE	-0.0485163	0.031871	VPS4A	VPS4A VPS4	Vacuolar protein sorting-associated protein 4A	-2.30715	-1.80352	0.0848013	0.231712	0.34269	2.35568	20	0.0186794	0.00265322	0.00434194	437	centrosome [GO:0005813]; cytoplasm [GO:0005737]; cytosol [GO:0005829]; early endosome [GO:0005769]; endosome [GO:0005768]; extracellular exosome [GO:0070062]; Flemming body [GO:0090543]; late endosome [GO:0005770]; late endosome membrane [GO:0031902]; lysosome [GO:0005764]; midbody [GO:0030496]; nucleus [GO:0005634]; perinuclear region of cytoplasm [GO:0048471]; plasma membrane [GO:0005886]; spin…	centrosome [GO:0005813]; cytoplasm [GO:0005737]; cytosol [GO:0005829]; early endosome [GO:0005769]; endosome [GO:0005768]; extracellular exosome [GO:0070062]; Flemming body [GO:0090543]; late endosome [GO:0005770]; late endosome membrane [GO:0031902]; lysosome [GO:0005764]; midbody [GO:0030496]; nucleus [GO:0005634]; perinuclear region of cytoplasm [GO:0048471]; plasma membrane [GO:0005886]; spin…	centrosome [GO:0005813]; cytoplasm [GO:0005737]; cytosol [GO:0005829]; early endosome [GO:0005769]; endosome [GO:0005768]; extracellular exosome [GO:0070062]; Flemming body [GO:0090543]; late endosome [GO:0005770]; late endosome membrane [GO:0031902]; lysosome [GO:0005764]; midbody [GO:0030496]; nucleus [GO:0005634]; perinuclear region of cytoplasm [GO:0048471]; plasma membrane [GO:0005886]; spin…	3D-structure; ATP-binding; Acetylation; Cell cycle; Cell division; Complete proteome; Disease mutation; Endosome; Hydrolase; Membrane; Nucleotide-binding; Phosphoprotein; Protein transport; Reference proteome; Transport	Involved in late steps of the endosomal multivesicular bodies (MVB) pathway. Recognizes membrane-associated ESCRT-III assemblies and catalyzes their disassembly, possibly in combination with membrane fission. Redistributes the ESCRT-III components to the cytoplasm for further rounds of MVB sorting. MVBs contain intraluminal vesicles (ILVs) that are generated by invagination and scission from the …	48898	49
VATF_HUMAN	TRUE	-0.26512	0.0172555	ATP6V1F	NA	NA	-2.72776	-2.84014	0.0121909	0.178455	0.155949	2.35568	13	0.0186794	0.0377862	0.034855	NA	NA	NA	NA	NA	NA	NA	NA
VATB2_HUMAN	TRUE	-0.0580721	0.0395574	ATP6V1B2	ATP6V1B2 ATP6B2 VPP3	V-type proton ATPase subunit B, brain isoform	-2.20212	-1.88391	0.0726493	0.253881	0.320518	2.35568	20	0.0186794	0.00417257	0.0057012	511	cytosol [GO:0005829]; endomembrane system [GO:0012505]; extracellular exosome [GO:0070062]; integral component of membrane [GO:0016021]; intracellular membrane-bounded organelle [GO:0043231]; lysosomal membrane [GO:0005765]; melanosome [GO:0042470]; microvillus [GO:0005902]; myelin sheath [GO:0043209]; plasma membrane [GO:0005886]; proton-transporting V-type ATPase, V1 domain [GO:0033180]; ruffle…	cytosol [GO:0005829]; endomembrane system [GO:0012505]; extracellular exosome [GO:0070062]; integral component of membrane [GO:0016021]; intracellular membrane-bounded organelle [GO:0043231]; lysosomal membrane [GO:0005765]; melanosome [GO:0042470]; microvillus [GO:0005902]; myelin sheath [GO:0043209]; plasma membrane [GO:0005886]; proton-transporting V-type ATPase, V1 domain [GO:0033180]; ruffle…	cytosol [GO:0005829]; endomembrane system [GO:0012505]; extracellular exosome [GO:0070062]; integral component of membrane [GO:0016021]; intracellular membrane-bounded organelle [GO:0043231]; lysosomal membrane [GO:0005765]; melanosome [GO:0042470]; microvillus [GO:0005902]; myelin sheath [GO:0043209]; plasma membrane [GO:0005886]; proton-transporting V-type ATPase, V1 domain [GO:0033180]; ruffle…	Complete proteome; Deafness; Disease mutation; Hydrogen ion transport; Hydrolase; Ion transport; Membrane; Reference proteome; Transport	Non-catalytic subunit of the peripheral V1 complex of vacuolar ATPase. V-ATPase is responsible for acidifying a variety of intracellular compartments in eukaryotic cells.	56501	57
VAMP5_HUMAN	TRUE	-0.261324	0.0164906	VAMP5	VAMP5 HSPC191	Vesicle-associated membrane protein 5	-2.7515	-2.85931	0.0117234	0.175569	0.155949	2.35568	13	0.0186794	0.0360812	0.0334116	116	cell surface [GO:0009986]; cytoplasmic vesicle membrane [GO:0030659]; extracellular exosome [GO:0070062]; Golgi apparatus [GO:0005794]; integral component of organelle membrane [GO:0031301]; integral component of plasma membrane [GO:0005887]; intercalated disc [GO:0014704]; late endosome [GO:0005770]; perinuclear region of cytoplasm [GO:0048471]; plasma membrane [GO:0005886]; SNARE complex [GO:00…	cell surface [GO:0009986]; cytoplasmic vesicle membrane [GO:0030659]; extracellular exosome [GO:0070062]; Golgi apparatus [GO:0005794]; integral component of organelle membrane [GO:0031301]; integral component of plasma membrane [GO:0005887]; intercalated disc [GO:0014704]; late endosome [GO:0005770]; perinuclear region of cytoplasm [GO:0048471]; plasma membrane [GO:0005886]; SNARE complex [GO:00…	cell surface [GO:0009986]; cytoplasmic vesicle membrane [GO:0030659]; extracellular exosome [GO:0070062]; Golgi apparatus [GO:0005794]; integral component of organelle membrane [GO:0031301]; integral component of plasma membrane [GO:0005887]; intercalated disc [GO:0014704]; late endosome [GO:0005770]; perinuclear region of cytoplasm [GO:0048471]; plasma membrane [GO:0005886]; SNARE complex [GO:00…	Cell membrane; Coiled coil; Complete proteome; Developmental protein; Differentiation; Golgi apparatus; Membrane; Myogenesis; Phosphoprotein; Reference proteome; Transmembrane; Transmembrane helix	May participate in trafficking events that are associated with myogenesis, such as myoblast fusion and/or GLUT4 trafficking.	12805	13
UBP53_HUMAN	TRUE	-0.23709	0.0317688	USP53	NA	NA	-2.78542	-2.67841	0.026942	0.231712	0.213335	2.35568	6	0.0186794	0.0144902	0.0156713	NA	NA	NA	NA	NA	NA	NA	NA
UBC9_HUMAN	TRUE	-0.170892	0.0120218	UBE2I	NA	NA	-2.7621	-2.78968	0.0105841	0.157154	0.1497	2.35568	20	0.0186794	0.0229676	0.0225157	NA	NA	NA	NA	NA	NA	NA	NA
TRIM7_HUMAN	TRUE	-0.203447	0.0113369	TRIM7	TRIM7 GNIP RNF90	Tripartite motif-containing protein 7	-2.78869	-2.85175	0.00918408	0.155277	0.141556	2.35568	20	0.0186794	0.0319339	0.0305373	511	cytoplasm [GO:0005737]; nucleus [GO:0005634]; zinc ion binding [GO:0008270]	cytoplasm [GO:0005737]; nucleus [GO:0005634]; zinc ion binding [GO:0008270]	cytoplasm [GO:0005737]; nucleus [GO:0005634]; zinc ion binding [GO:0008270]	Alternative splicing; Coiled coil; Complete proteome; Metal-binding; Polymorphism; Reference proteome; Zinc; Zinc-finger		56631	57
TPM1_HUMAN	TRUE	-0.246659	0.0490309	TPM1	TPM1 C15orf13 TMSA	Tropomyosin alpha-1 chain	-2.09577	-2.187	0.039482	0.277193	0.250482	2.35568	20	0.0186794	0.0831115	0.0763221	284	actin cytoskeleton [GO:0015629]; actin filament [GO:0005884]; bleb [GO:0032059]; cytoskeleton [GO:0005856]; cytosol [GO:0005829]; filamentous actin [GO:0031941]; muscle thin filament tropomyosin [GO:0005862]; ruffle membrane [GO:0032587]; sarcomere [GO:0030017]; stress fiber [GO:0001725]; actin binding [GO:0003779]; actin filament binding [GO:0051015]; cytoskeletal protein binding [GO:0008092]; s…	actin cytoskeleton [GO:0015629]; actin filament [GO:0005884]; bleb [GO:0032059]; cytoskeleton [GO:0005856]; cytosol [GO:0005829]; filamentous actin [GO:0031941]; muscle thin filament tropomyosin [GO:0005862]; ruffle membrane [GO:0032587]; sarcomere [GO:0030017]; stress fiber [GO:0001725]; actin binding [GO:0003779]; actin filament binding [GO:0051015]; cytoskeletal protein binding [GO:0008092]; s…	actin cytoskeleton [GO:0015629]; actin filament [GO:0005884]; bleb [GO:0032059]; cytoskeleton [GO:0005856]; cytosol [GO:0005829]; filamentous actin [GO:0031941]; muscle thin filament tropomyosin [GO:0005862]; ruffle membrane [GO:0032587]; sarcomere [GO:0030017]; stress fiber [GO:0001725]; actin binding [GO:0003779]; actin filament binding [GO:0051015]; cytoskeletal protein binding [GO:0008092]; s…	Acetylation; Actin-binding; Alternative splicing; Cardiomyopathy; Coiled coil; Complete proteome; Cytoplasm; Cytoskeleton; Direct protein sequencing; Disease mutation; Muscle protein; Phosphoprotein; Reference proteome	Binds to actin filaments in muscle and non-muscle cells. Plays a central role, in association with the troponin complex, in the calcium dependent regulation of vertebrate striated muscle contraction. Smooth muscle contraction is regulated by interaction with caldesmon. In non-muscle cells is implicated in stabilizing cytoskeleton actin filaments.	32709	33
TNNT3_HUMAN	TRUE	-0.256226	0.0276933	TNNT3	TNNT3	Troponin T, fast skeletal muscle	-2.37451	-2.47183	0.0215158	0.215884	0.193939	2.35568	20	0.0186794	0.0698638	0.0644703	269	cytosol [GO:0005829]; troponin complex [GO:0005861]; calcium-dependent protein binding [GO:0048306]; tropomyosin binding [GO:0005523]; troponin C binding [GO:0030172]; troponin I binding [GO:0031013]; muscle filament sliding [GO:0030049]; regulation of ATPase activity [GO:0043462]; regulation of striated muscle contraction [GO:0006942]; skeletal muscle contraction [GO:0003009]	cytosol [GO:0005829]; troponin complex [GO:0005861]; calcium-dependent protein binding [GO:0048306]; tropomyosin binding [GO:0005523]; troponin C binding [GO:0030172]; troponin I binding [GO:0031013]; muscle filament sliding [GO:0030049]; regulation of ATPase activity [GO:0043462]; regulation of striated muscle contraction [GO:0006942]; skeletal muscle contraction [GO:0003009]	cytosol [GO:0005829]; troponin complex [GO:0005861]; calcium-dependent protein binding [GO:0048306]; tropomyosin binding [GO:0005523]; troponin C binding [GO:0030172]; troponin I binding [GO:0031013]; muscle filament sliding [GO:0030049]; regulation of ATPase activity [GO:0043462]; regulation of striated muscle contraction [GO:0006942]; skeletal muscle contraction [GO:0003009]	Acetylation; Alternative splicing; Complete proteome; Disease mutation; Muscle protein; Phosphoprotein; Reference proteome	Troponin T is the tropomyosin-binding subunit of troponin, the thin filament regulatory complex which confers calcium-sensitivity to striated muscle actomyosin ATPase activity.	31825	32
TM38A_HUMAN	TRUE	-0.154247	0.0190481	TMEM38A	TMEM38A	Trimeric intracellular cation channel type A	-2.5507	-2.57091	0.0173041	0.183709	0.17705	2.35568	20	0.0186794	0.0219416	0.0215979	299	extracellular exosome [GO:0070062]; integral component of membrane [GO:0016021]; nuclear membrane [GO:0031965]; sarcoplasmic reticulum [GO:0016529]; sarcoplasmic reticulum membrane [GO:0033017]; calcium-activated potassium channel activity [GO:0015269]; potassium channel activity [GO:0005267]	extracellular exosome [GO:0070062]; integral component of membrane [GO:0016021]; nuclear membrane [GO:0031965]; sarcoplasmic reticulum [GO:0016529]; sarcoplasmic reticulum membrane [GO:0033017]; calcium-activated potassium channel activity [GO:0015269]; potassium channel activity [GO:0005267]	extracellular exosome [GO:0070062]; integral component of membrane [GO:0016021]; nuclear membrane [GO:0031965]; sarcoplasmic reticulum [GO:0016529]; sarcoplasmic reticulum membrane [GO:0033017]; calcium-activated potassium channel activity [GO:0015269]; potassium channel activity [GO:0005267]	Complete proteome; Ion channel; Ion transport; Membrane; Nucleus; Potassium; Potassium channel; Potassium transport; Reference proteome; Sarcoplasmic reticulum; Transmembrane; Transmembrane helix; Transport	Monovalent cation channel required for maintenance of rapid intracellular calcium release. May act as a potassium counter-ion channel that functions in synchronization with calcium release from intracellular stores. {ECO:0000250|UniProtKB:Q3TMP8}.	33260	33
TM222_HUMAN	TRUE	-0.0930505	0.027319	TMEM222	TMEM222 C1orf160	Transmembrane protein 222	-2.38099	-2.26053	0.0338539	0.215363	0.23306	2.35568	20	0.0186794	0.00916374	0.0101664	208	integral component of membrane [GO:0016021]	integral component of membrane [GO:0016021]	integral component of membrane [GO:0016021]	Alternative splicing; Complete proteome; Membrane; Reference proteome; Transmembrane; Transmembrane helix		23230	23
TEBP_HUMAN	TRUE	-0.0838675	0.00833484	PTGES3	PTGES3 P23 TEBP	Prostaglandin E synthase 3	-2.92704	-2.57292	0.0172275	0.141415	0.17705	2.35568	20	0.0186794	0.00492586	0.00637511	160	chromosome, telomeric region [GO:0000781]; cytosol [GO:0005829]; extracellular exosome [GO:0070062]; nucleoplasm [GO:0005654]; nucleus [GO:0005634]; protein complex [GO:0043234]; telomerase holoenzyme complex [GO:0005697]; DNA polymerase binding [GO:0070182]; Hsp90 protein binding [GO:0051879]; prostaglandin-E synthase activity [GO:0050220]; telomerase activity [GO:0003720]; unfolded protein bind…	chromosome, telomeric region [GO:0000781]; cytosol [GO:0005829]; extracellular exosome [GO:0070062]; nucleoplasm [GO:0005654]; nucleus [GO:0005634]; protein complex [GO:0043234]; telomerase holoenzyme complex [GO:0005697]; DNA polymerase binding [GO:0070182]; Hsp90 protein binding [GO:0051879]; prostaglandin-E synthase activity [GO:0050220]; telomerase activity [GO:0003720]; unfolded protein bind…	chromosome, telomeric region [GO:0000781]; cytosol [GO:0005829]; extracellular exosome [GO:0070062]; nucleoplasm [GO:0005654]; nucleus [GO:0005634]; protein complex [GO:0043234]; telomerase holoenzyme complex [GO:0005697]; DNA polymerase binding [GO:0070182]; Hsp90 protein binding [GO:0051879]; prostaglandin-E synthase activity [GO:0050220]; telomerase activity [GO:0003720]; unfolded protein bind…	3D-structure; Acetylation; Alternative splicing; Chaperone; Complete proteome; Cytoplasm; Direct protein sequencing; Fatty acid biosynthesis; Fatty acid metabolism; Isomerase; Lipid biosynthesis; Lipid metabolism; Phosphoprotein; Prostaglandin biosynthesis; Prostaglandin metabolism; Reference proteome	Cytosolic prostaglandin synthase that catalyzes the oxidoreduction of prostaglandin endoperoxide H2 (PGH2) to prostaglandin E2 (PGE2) (PubMed:10922363). Molecular chaperone that localizes to genomic response elements in a hormone-dependent manner and disrupts receptor-mediated transcriptional activation, by promoting disassembly of transcriptional regulatory complexes (PubMed:11274138, PubMed:120…	18697	19
TE2IP_HUMAN	TRUE	-0.205337	0.00174242	TERF2IP	NA	NA	-3.6112	-3.61828	0.00149369	0.112467	0.108611	2.35568	20	0.0186794	0.0193992	0.0193233	NA	NA	NA	NA	NA	NA	NA	NA
TDIF1_HUMAN	TRUE	-0.165431	0.0489167	DNTTIP1	NA	NA	-2.17234	-2.20554	0.0430459	0.276972	0.26156	2.35568	13	0.0186794	0.0231973	0.0225042	NA	NA	NA	NA	NA	NA	NA	NA
TCF25_HUMAN	TRUE	-0.449652	0.012844	TCF25	NA	NA	-3.49887	-3.73511	0.00531605	0.161355	0.126354	2.35568	6	0.0186794	0.0330314	0.0289852	NA	NA	NA	NA	NA	NA	NA	NA
TBCD4_HUMAN	TRUE	-0.0806489	0.0182649	TBC1D4	TBC1D4 AS160 KIAA0603	TBC1 domain family member 4	-2.5702	-2.31954	0.0298774	0.182404	0.222565	2.35568	20	0.0186794	0.00590763	0.00725343	1298	cytoplasmic vesicle membrane [GO:0030659]; cytosol [GO:0005829]; endomembrane system [GO:0012505]; extracellular exosome [GO:0070062]; intracellular [GO:0005622]; GTPase activator activity [GO:0005096]; Rab GTPase binding [GO:0017137]; activation of GTPase activity [GO:0090630]; cellular response to insulin stimulus [GO:0032869]; intracellular protein transport [GO:0006886]; membrane organization…	cytoplasmic vesicle membrane [GO:0030659]; cytosol [GO:0005829]; endomembrane system [GO:0012505]; extracellular exosome [GO:0070062]; intracellular [GO:0005622]; GTPase activator activity [GO:0005096]; Rab GTPase binding [GO:0017137]; activation of GTPase activity [GO:0090630]; cellular response to insulin stimulus [GO:0032869]; intracellular protein transport [GO:0006886]; membrane organization…	cytoplasmic vesicle membrane [GO:0030659]; cytosol [GO:0005829]; endomembrane system [GO:0012505]; extracellular exosome [GO:0070062]; intracellular [GO:0005622]; GTPase activator activity [GO:0005096]; Rab GTPase binding [GO:0017137]; activation of GTPase activity [GO:0090630]; cellular response to insulin stimulus [GO:0032869]; intracellular protein transport [GO:0006886]; membrane organization…	3D-structure; Acetylation; Alternative splicing; Complete proteome; Cytoplasm; Diabetes mellitus; GTPase activation; Methylation; Phosphoprotein; Polymorphism; Reference proteome; Repeat	May act as a GTPase-activating protein for RAB2A, RAB8A, RAB10 and RAB14. Isoform 2 promotes insulin-induced glucose transporter SLC2A4/GLUT4 translocation at the plasma membrane, thus increasing glucose uptake. {ECO:0000269|PubMed:15971998, ECO:0000269|PubMed:18771725, ECO:0000269|PubMed:22908308}.	146563	147
TBC25_HUMAN	TRUE	-0.580069	0.0422818	TBC1D25	NA	NA	-2.57093	-2.93024	0.0181207	0.260798	0.180167	2.35568	6	0.0186794	0.101814	0.0783762	NA	NA	NA	NA	NA	NA	NA	NA
TBC17_HUMAN	TRUE	-0.102227	0.00410526	TBC1D17	TBC1D17	TBC1 domain family member 17	-3.23981	-2.92825	0.00770057	0.123495	0.132983	2.35568	20	0.0186794	0.00597375	0.00731258	648	autophagosome [GO:0005776]; cytosol [GO:0005829]; endomembrane system [GO:0012505]; recycling endosome [GO:0055037]; GTPase activator activity [GO:0005096]; Rab GTPase binding [GO:0017137]; activation of GTPase activity [GO:0090630]; autophagy [GO:0006914]; intracellular protein transport [GO:0006886]; membrane organization [GO:0061024]; regulation of vesicle fusion [GO:0031338]; retrograde trans…	autophagosome [GO:0005776]; cytosol [GO:0005829]; endomembrane system [GO:0012505]; recycling endosome [GO:0055037]; GTPase activator activity [GO:0005096]; Rab GTPase binding [GO:0017137]; activation of GTPase activity [GO:0090630]; autophagy [GO:0006914]; intracellular protein transport [GO:0006886]; membrane organization [GO:0061024]; regulation of vesicle fusion [GO:0031338]; retrograde trans…	autophagosome [GO:0005776]; cytosol [GO:0005829]; endomembrane system [GO:0012505]; recycling endosome [GO:0055037]; GTPase activator activity [GO:0005096]; Rab GTPase binding [GO:0017137]; activation of GTPase activity [GO:0090630]; autophagy [GO:0006914]; intracellular protein transport [GO:0006886]; membrane organization [GO:0061024]; regulation of vesicle fusion [GO:0031338]; retrograde trans…	Alternative splicing; Autophagy; Complete proteome; Cytoplasmic vesicle; GTPase activation; Phosphoprotein; Polymorphism; Protein transport; Reference proteome; Transport	Probable GTPase-activating protein for Rab8; its transient association with Rab8 is mediated by OPTN. Inhibits Rab8-mediated endocytic trafficking, such as of transferrin receptor (TfR) and reduces Rab8 recruitnment to tubules emanating from the endocytic recycling compartment (ERC). Involved in regulation of autophagy. Mediates inhibition of autophagy caused by the OPTN variant GLC1E LYS-50; the…	72728	73
SYNRG_HUMAN	TRUE	-0.140611	0.0428917	SYNRG	SYNRG AP1GBP1 SYNG	Synergin gamma	-2.56029	-2.02977	0.0753808	0.262308	0.324446	2.35568	6	0.0186794	0.0060324	0.00959791	1314	AP-1 adaptor complex [GO:0030121]; cytoplasm [GO:0005737]; Golgi apparatus [GO:0005794]; endocytosis [GO:0006897]; intracellular protein transport [GO:0006886]	AP-1 adaptor complex [GO:0030121]; cytoplasm [GO:0005737]; Golgi apparatus [GO:0005794]; endocytosis [GO:0006897]; intracellular protein transport [GO:0006886]	AP-1 adaptor complex [GO:0030121]; cytoplasm [GO:0005737]; Golgi apparatus [GO:0005794]; endocytosis [GO:0006897]; intracellular protein transport [GO:0006886]	3D-structure; Acetylation; Alternative splicing; Coiled coil; Complete proteome; Cytoplasm; Endocytosis; Golgi apparatus; Membrane; Phosphoprotein; Polymorphism; Protein transport; Reference proteome; Repeat; Transport	May play a role in endocytosis and/or membrane trafficking at the trans-Golgi network (TGN). May act by linking the adapter protein complex AP-1 to other proteins.	140654	141
SYMPK_HUMAN	TRUE	-0.108263	0.0162155	SYMPK	SYMPK SPK	Symplekin	-2.62525	-2.51739	0.0194727	0.175569	0.185798	2.35568	20	0.0186794	0.0102041	0.0110972	1274	bicellular tight junction [GO:0005923]; cytoplasm [GO:0005737]; cytoskeleton [GO:0005856]; cytosol [GO:0005829]; nuclear stress granule [GO:0097165]; nucleoplasm [GO:0005654]; plasma membrane [GO:0005886]; cell adhesion [GO:0007155]; mRNA 3'-end processing [GO:0031124]; mRNA export from nucleus [GO:0006406]; mRNA polyadenylation [GO:0006378]; mRNA splicing, via spliceosome [GO:0000398]; positive …	bicellular tight junction [GO:0005923]; cytoplasm [GO:0005737]; cytoskeleton [GO:0005856]; cytosol [GO:0005829]; nuclear stress granule [GO:0097165]; nucleoplasm [GO:0005654]; plasma membrane [GO:0005886]; cell adhesion [GO:0007155]; mRNA 3'-end processing [GO:0031124]; mRNA export from nucleus [GO:0006406]; mRNA polyadenylation [GO:0006378]; mRNA splicing, via spliceosome [GO:0000398]; positive …	bicellular tight junction [GO:0005923]; cytoplasm [GO:0005737]; cytoskeleton [GO:0005856]; cytosol [GO:0005829]; nuclear stress granule [GO:0097165]; nucleoplasm [GO:0005654]; plasma membrane [GO:0005886]; cell adhesion [GO:0007155]; mRNA 3'-end processing [GO:0031124]; mRNA export from nucleus [GO:0006406]; mRNA polyadenylation [GO:0006378]; mRNA splicing, via spliceosome [GO:0000398]; positive …	3D-structure; Alternative splicing; Cell adhesion; Cell junction; Cell membrane; Complete proteome; Cytoplasm; Cytoskeleton; Isopeptide bond; Membrane; Nucleus; Phosphoprotein; Reference proteome; Repeat; Tight junction; Ubl conjugation; mRNA processing	Scaffold protein that functions as a component of a multimolecular complex involved in histone mRNA 3'-end processing. Specific component of the tight junction (TJ) plaque, but might not be an exclusively junctional component. May have a house-keeping rule. Is involved in pre-mRNA polyadenylation. Enhances SSU72 phosphatase activity. {ECO:0000269|PubMed:16230528, ECO:0000269|PubMed:20861839}.	141148	141
STAR7_HUMAN	TRUE	-0.0863588	0.0426988	STARD7	STARD7 GTT1	StAR-related lipid transfer protein 7, mitochondrial	-2.1645	-2.06311	0.0509055	0.262039	0.278992	2.35568	20	0.0186794	0.00955098	0.0105129	370	mitochondrial outer membrane [GO:0005741]; lipid binding [GO:0008289]; phosphatidylcholine biosynthetic process [GO:0006656]; positive regulation of protein targeting to mitochondrion [GO:1903955]	mitochondrial outer membrane [GO:0005741]; lipid binding [GO:0008289]; phosphatidylcholine biosynthetic process [GO:0006656]; positive regulation of protein targeting to mitochondrion [GO:1903955]	mitochondrial outer membrane [GO:0005741]; lipid binding [GO:0008289]; phosphatidylcholine biosynthetic process [GO:0006656]; positive regulation of protein targeting to mitochondrion [GO:1903955]	Coiled coil; Complete proteome; Mitochondrion; Polymorphism; Reference proteome; Transit peptide	May play a protective role in mucosal tissues by preventing exaggerated allergic responses. {ECO:0000250|UniProtKB:Q8R1R3}.	43113	43
SRP09_HUMAN	TRUE	-0.146429	0.00152579	SRP9	SRP9	Signal recognition particle 9 kDa protein	-3.66829	-3.49677	0.00200419	0.112467	0.108611	2.35568	20	0.0186794	0.00956043	0.0105213	86	cytosol [GO:0005829]; extracellular exosome [GO:0070062]; signal recognition particle receptor complex [GO:0005785]; signal recognition particle, endoplasmic reticulum targeting [GO:0005786]; 7S RNA binding [GO:0008312]; RNA binding [GO:0003723]; signal recognition particle binding [GO:0005047]; negative regulation of translational elongation [GO:0045900]; SRP-dependent cotranslational protein ta…	cytosol [GO:0005829]; extracellular exosome [GO:0070062]; signal recognition particle receptor complex [GO:0005785]; signal recognition particle, endoplasmic reticulum targeting [GO:0005786]; 7S RNA binding [GO:0008312]; RNA binding [GO:0003723]; signal recognition particle binding [GO:0005047]; negative regulation of translational elongation [GO:0045900]; SRP-dependent cotranslational protein ta…	cytosol [GO:0005829]; extracellular exosome [GO:0070062]; signal recognition particle receptor complex [GO:0005785]; signal recognition particle, endoplasmic reticulum targeting [GO:0005786]; 7S RNA binding [GO:0008312]; RNA binding [GO:0003723]; signal recognition particle binding [GO:0005047]; negative regulation of translational elongation [GO:0045900]; SRP-dependent cotranslational protein ta…	3D-structure; Acetylation; Alternative splicing; Complete proteome; Cytoplasm; Direct protein sequencing; RNA-binding; Reference proteome; Ribonucleoprotein; Signal recognition particle	Signal-recognition-particle assembly has a crucial role in targeting secretory proteins to the rough endoplasmic reticulum membrane. SRP9 together with SRP14 and the Alu portion of the SRP RNA, constitutes the elongation arrest domain of SRP. The complex of SRP9 and SRP14 is required for SRP RNA binding.	10112	10
SPTN2_HUMAN	TRUE	-0.167475	0.036408	SPTBN2	NA	NA	-2.68264	-2.27238	0.0513402	0.243655	0.279921	2.35568	6	0.0186794	0.00779481	0.0108635	NA	NA	NA	NA	NA	NA	NA	NA
SMTL1_HUMAN	TRUE	-0.170044	0.0326471	SMTNL1	SMTNL1	Smoothelin-like protein 1	-2.29555	-2.34973	0.0280133	0.233148	0.217957	2.35568	20	0.0186794	0.032923	0.0314221	457	contractile fiber [GO:0043292]; cytoplasm [GO:0005737]; I band [GO:0031674]; M band [GO:0031430]; nucleus [GO:0005634]; calmodulin binding [GO:0005516]; negative regulation of blood vessel diameter [GO:0097756]; positive regulation of vasoconstriction [GO:0045907]	contractile fiber [GO:0043292]; cytoplasm [GO:0005737]; I band [GO:0031674]; M band [GO:0031430]; nucleus [GO:0005634]; calmodulin binding [GO:0005516]; negative regulation of blood vessel diameter [GO:0097756]; positive regulation of vasoconstriction [GO:0045907]	contractile fiber [GO:0043292]; cytoplasm [GO:0005737]; I band [GO:0031674]; M band [GO:0031430]; nucleus [GO:0005634]; calmodulin binding [GO:0005516]; negative regulation of blood vessel diameter [GO:0097756]; positive regulation of vasoconstriction [GO:0045907]	Calmodulin-binding; Coiled coil; Complete proteome; Cytoplasm; Muscle protein; Nucleus; Phosphoprotein; Reference proteome	Plays a role in the regulation of contractile properties of both striated and smooth muscles. When unphosphorylated, may inhibit myosin dephosphorylation. Phosphorylation at Ser-299 reduces this inhibitory activity (By similarity). {ECO:0000250}.	48953	49
SMCO1_HUMAN	TRUE	-0.146617	0.0377024	SMCO1	SMCO1 C3orf43	Single-pass membrane and coiled-coil domain-containing protein 1	-2.22563	-2.25953	0.033925	0.24818	0.23306	2.35568	20	0.0186794	0.0260384	0.0252629	214	integral component of membrane [GO:0016021]	integral component of membrane [GO:0016021]	integral component of membrane [GO:0016021]	Coiled coil; Complete proteome; Membrane; Polymorphism; Reference proteome; Transmembrane; Transmembrane helix		24598	25
SMCE1_HUMAN	TRUE	-0.111652	0.0184105	SMARCE1	SMARCE1 BAF57	SWI/SNF-related matrix-associated actin-dependent regulator of chromatin subfamily E member 1	-2.56652	-2.48351	0.020974	0.183082	0.192118	2.35568	20	0.0186794	0.0113552	0.012127	411	nBAF complex [GO:0071565]; npBAF complex [GO:0071564]; nuclear chromatin [GO:0000790]; nuclear chromosome [GO:0000228]; nucleoplasm [GO:0005654]; nucleus [GO:0005634]; protein complex [GO:0043234]; SWI/SNF complex [GO:0016514]; transcriptional repressor complex [GO:0017053]; chromatin binding [GO:0003682]; DNA binding [GO:0003677]; ligand-dependent nuclear receptor binding [GO:0016922]; N-acetylt…	nBAF complex [GO:0071565]; npBAF complex [GO:0071564]; nuclear chromatin [GO:0000790]; nuclear chromosome [GO:0000228]; nucleoplasm [GO:0005654]; nucleus [GO:0005634]; protein complex [GO:0043234]; SWI/SNF complex [GO:0016514]; transcriptional repressor complex [GO:0017053]; chromatin binding [GO:0003682]; DNA binding [GO:0003677]; ligand-dependent nuclear receptor binding [GO:0016922]; N-acetylt…	nBAF complex [GO:0071565]; npBAF complex [GO:0071564]; nuclear chromatin [GO:0000790]; nuclear chromosome [GO:0000228]; nucleoplasm [GO:0005654]; nucleus [GO:0005634]; protein complex [GO:0043234]; SWI/SNF complex [GO:0016514]; transcriptional repressor complex [GO:0017053]; chromatin binding [GO:0003682]; DNA binding [GO:0003677]; ligand-dependent nuclear receptor binding [GO:0016922]; N-acetylt…	Alternative splicing; Chromatin regulator; Coiled coil; Complete proteome; DNA-binding; Disease mutation; Isopeptide bond; Mental retardation; Methylation; Neurogenesis; Nucleus; Phosphoprotein; Reference proteome; Ubl conjugation	Involved in transcriptional activation and repression of select genes by chromatin remodeling (alteration of DNA-nucleosome topology). Belongs to the neural progenitors-specific chromatin remodeling complex (npBAF complex) and the neuron-specific chromatin remodeling complex (nBAF complex). During neural development a switch from a stem/progenitor to a postmitotic chromatin remodeling mechanism o…	46649	47
SHPK_HUMAN	TRUE	-0.352775	0.0455403	SHPK	NA	NA	-2.21132	-2.36435	0.0316268	0.268594	0.228863	2.35568	13	0.0186794	0.101801	0.0890498	NA	NA	NA	NA	NA	NA	NA	NA
SH3G1_HUMAN	TRUE	-0.135484	0.0187916	SH3GL1	SH3GL1 CNSA1 SH3D2B	Endophilin-A2	-2.557	-2.54245	0.0184275	0.183551	0.181963	2.35568	20	0.0186794	0.0168447	0.0170381	368	cell junction [GO:0030054]; cell projection [GO:0042995]; cytoplasm [GO:0005737]; early endosome membrane [GO:0031901]; podosome [GO:0002102]; synapse [GO:0045202]; cadherin binding [GO:0045296]; GTPase binding [GO:0051020]; identical protein binding [GO:0042802]; lipid binding [GO:0008289]; phosphatase binding [GO:0019902]; central nervous system development [GO:0007417]; signal transduction [GO…	cell junction [GO:0030054]; cell projection [GO:0042995]; cytoplasm [GO:0005737]; early endosome membrane [GO:0031901]; podosome [GO:0002102]; synapse [GO:0045202]; cadherin binding [GO:0045296]; GTPase binding [GO:0051020]; identical protein binding [GO:0042802]; lipid binding [GO:0008289]; phosphatase binding [GO:0019902]; central nervous system development [GO:0007417]; signal transduction [GO…	cell junction [GO:0030054]; cell projection [GO:0042995]; cytoplasm [GO:0005737]; early endosome membrane [GO:0031901]; podosome [GO:0002102]; synapse [GO:0045202]; cadherin binding [GO:0045296]; GTPase binding [GO:0051020]; identical protein binding [GO:0042802]; lipid binding [GO:0008289]; phosphatase binding [GO:0019902]; central nervous system development [GO:0007417]; signal transduction [GO…	Alternative splicing; Cell junction; Cell projection; Chromosomal rearrangement; Coiled coil; Complete proteome; Cytoplasm; Endocytosis; Endosome; Lipid-binding; Membrane; Phosphoprotein; Proto-oncogene; Reference proteome; SH3 domain	Implicated in endocytosis. May recruit other proteins to membranes with high curvature (By similarity). {ECO:0000250}.	41490	41
SGCA_HUMAN	TRUE	-0.0368694	0.0209399	SGCA	SGCA ADL DAG2	Alpha-sarcoglycan	-2.50652	-1.61432	0.120485	0.189955	0.392348	2.35568	20	0.0186794	0.0012982	0.0031297	387	cell-cell junction [GO:0005911]; cytoplasm [GO:0005737]; cytoskeleton [GO:0005856]; dystrophin-associated glycoprotein complex [GO:0016010]; integral component of membrane [GO:0016021]; membrane raft [GO:0045121]; sarcoglycan complex [GO:0016012]; sarcolemma [GO:0042383]; calcium ion binding [GO:0005509]; membrane organization [GO:0061024]; muscle contraction [GO:0006936]; muscle organ developmen…	cell-cell junction [GO:0005911]; cytoplasm [GO:0005737]; cytoskeleton [GO:0005856]; dystrophin-associated glycoprotein complex [GO:0016010]; integral component of membrane [GO:0016021]; membrane raft [GO:0045121]; sarcoglycan complex [GO:0016012]; sarcolemma [GO:0042383]; calcium ion binding [GO:0005509]; membrane organization [GO:0061024]; muscle contraction [GO:0006936]; muscle organ developmen…	cell-cell junction [GO:0005911]; cytoplasm [GO:0005737]; cytoskeleton [GO:0005856]; dystrophin-associated glycoprotein complex [GO:0016010]; integral component of membrane [GO:0016021]; membrane raft [GO:0045121]; sarcoglycan complex [GO:0016012]; sarcolemma [GO:0042383]; calcium ion binding [GO:0005509]; membrane organization [GO:0061024]; muscle contraction [GO:0006936]; muscle organ developmen…	Alternative splicing; Cell membrane; Complete proteome; Cytoplasm; Cytoskeleton; Disease mutation; Glycoprotein; Limb-girdle muscular dystrophy; Membrane; Phosphoprotein; Reference proteome; Signal; Transmembrane; Transmembrane helix	Component of the sarcoglycan complex, a subcomplex of the dystrophin-glycoprotein complex which forms a link between the F-actin cytoskeleton and the extracellular matrix.	42875	43
SFR19_HUMAN	TRUE	-0.354879	0.0313143	SCAF1	NA	NA	-2.31564	-2.42933	0.0236	0.228832	0.201963	2.35568	20	0.0186794	0.140919	0.128038	NA	NA	NA	NA	NA	NA	NA	NA
SF3B4_HUMAN	TRUE	-0.120439	0.00846644	SF3B4	NA	NA	-2.92003	-2.80015	0.0103345	0.141794	0.148351	2.35568	20	0.0186794	0.0102073	0.0111	NA	NA	NA	NA	NA	NA	NA	NA
SELH_HUMAN	TRUE	-0.233845	0.0132696	SELENOH	SELENOH C11orf31 SELH	Selenoprotein H	-2.71716	-2.80415	0.0102406	0.163073	0.147443	2.35568	20	0.0186794	0.0444403	0.0417258	122	RNA binding [GO:0003723]	RNA binding [GO:0003723]	RNA binding [GO:0003723]	Acetylation; Complete proteome; Redox-active center; Reference proteome; Selenocysteine	May be involved in a redox-related process. {ECO:0000305}.	13453	13
SCAM4_HUMAN	TRUE	-0.241914	0.000476339	SCAMP4	NA	NA	-4.62415	-4.39232	0.000498017	0.0978309	0.0988917	2.35568	13	0.0186794	0.0109476	0.0121337	NA	NA	NA	NA	NA	NA	NA	NA
SC16A_HUMAN	TRUE	-0.0671721	0.0377074	SEC16A	SEC16A KIAA0310 SEC16 SEC16L	Protein transport protein Sec16A	-2.22557	-1.98684	0.0593306	0.24818	0.292331	2.35568	20	0.0186794	0.00546573	0.00685809	2179	cytosol [GO:0005829]; endoplasmic reticulum [GO:0005783]; endoplasmic reticulum membrane [GO:0005789]; Golgi apparatus [GO:0005794]; Golgi membrane [GO:0000139]; COPII vesicle coating [GO:0048208]; endoplasmic reticulum organization [GO:0007029]; protein transport [GO:0015031]; substantia nigra development [GO:0021762]	cytosol [GO:0005829]; endoplasmic reticulum [GO:0005783]; endoplasmic reticulum membrane [GO:0005789]; Golgi apparatus [GO:0005794]; Golgi membrane [GO:0000139]; COPII vesicle coating [GO:0048208]; endoplasmic reticulum organization [GO:0007029]; protein transport [GO:0015031]; substantia nigra development [GO:0021762]	cytosol [GO:0005829]; endoplasmic reticulum [GO:0005783]; endoplasmic reticulum membrane [GO:0005789]; Golgi apparatus [GO:0005794]; Golgi membrane [GO:0000139]; COPII vesicle coating [GO:0048208]; endoplasmic reticulum organization [GO:0007029]; protein transport [GO:0015031]; substantia nigra development [GO:0021762]	Alternative splicing; Complete proteome; ER-Golgi transport; Endoplasmic reticulum; Golgi apparatus; Membrane; Phosphoprotein; Polymorphism; Protein transport; Reference proteome; Transport	Defines endoplasmic reticulum exit sites (ERES) and is required for secretory cargo traffic from the endoplasmic reticulum to the Golgi apparatus. SAR1A-GTP-dependent assembly of SEC16A on the ER membrane forms an organized scaffold defining an ERES. Required for normal transitional endoplasmic reticulum (tER) organization. {ECO:0000269|PubMed:17005010, ECO:0000269|PubMed:17192411}.	233517	234
S36A2_HUMAN	TRUE	-0.417197	0.00645791	SLC36A2	SLC36A2 PAT2 TRAMD1	Proton-coupled amino acid transporter 2	-3.23946	-3.43424	0.00358252	0.138767	0.113342	2.35568	13	0.0186794	0.0663433	0.0590313	483	extracellular exosome [GO:0070062]; integral component of membrane [GO:0016021]; plasma membrane [GO:0005886]; vacuolar membrane [GO:0005774]; amino acid transmembrane transporter activity [GO:0015171]; glycine transmembrane transporter activity [GO:0015187]; hydrogen ion transmembrane transporter activity [GO:0015078]; hydrogen:amino acid symporter activity [GO:0005280]; L-alanine transmembrane …	extracellular exosome [GO:0070062]; integral component of membrane [GO:0016021]; plasma membrane [GO:0005886]; vacuolar membrane [GO:0005774]; amino acid transmembrane transporter activity [GO:0015171]; glycine transmembrane transporter activity [GO:0015187]; hydrogen ion transmembrane transporter activity [GO:0015078]; hydrogen:amino acid symporter activity [GO:0005280]; L-alanine transmembrane …	extracellular exosome [GO:0070062]; integral component of membrane [GO:0016021]; plasma membrane [GO:0005886]; vacuolar membrane [GO:0005774]; amino acid transmembrane transporter activity [GO:0015171]; glycine transmembrane transporter activity [GO:0015187]; hydrogen ion transmembrane transporter activity [GO:0015078]; hydrogen:amino acid symporter activity [GO:0005280]; L-alanine transmembrane …	Alternative splicing; Amino-acid transport; Cell membrane; Complete proteome; Cytoplasm; Disease mutation; Membrane; Polymorphism; Reference proteome; Transmembrane; Transmembrane helix; Transport	Involved in a pH-dependent electrogenic neuronal transport and sequestration of small amino acids. Transports glycine and proline. Inhibited by sarcosine (By similarity). {ECO:0000250, ECO:0000269|PubMed:19033659}.	53216	53
S29A2_HUMAN	TRUE	-0.267749	0.047189	SLC29A2	NA	NA	-2.48958	-2.56003	0.0325033	0.27254	0.230538	2.35568	6	0.0186794	0.0231331	0.0218775	NA	NA	NA	NA	NA	NA	NA	NA
RU1C_HUMAN	TRUE	-0.118529	0.0287405	SNRPC	NA	NA	-2.45867	-2.28791	0.0367132	0.219853	0.242328	2.35568	13	0.0186794	0.00929621	0.0107357	NA	NA	NA	NA	NA	NA	NA	NA
RS2_HUMAN	TRUE	-0.0760229	0.00678568	RPS2	RPS2 RPS4	40S ribosomal protein S2	-3.01859	-2.54047	0.0185084	0.138863	0.182388	2.35568	20	0.0186794	0.00380567	0.00537295	293	cytosol [GO:0005829]; cytosolic small ribosomal subunit [GO:0022627]; extracellular exosome [GO:0070062]; focal adhesion [GO:0005925]; membrane [GO:0016020]; nucleoplasm [GO:0005654]; nucleus [GO:0005634]; cadherin binding [GO:0045296]; enzyme binding [GO:0019899]; fibroblast growth factor binding [GO:0017134]; mRNA binding [GO:0003729]; RNA binding [GO:0003723]; structural constituent of ribosom…	cytosol [GO:0005829]; cytosolic small ribosomal subunit [GO:0022627]; extracellular exosome [GO:0070062]; focal adhesion [GO:0005925]; membrane [GO:0016020]; nucleoplasm [GO:0005654]; nucleus [GO:0005634]; cadherin binding [GO:0045296]; enzyme binding [GO:0019899]; fibroblast growth factor binding [GO:0017134]; mRNA binding [GO:0003729]; RNA binding [GO:0003723]; structural constituent of ribosom…	cytosol [GO:0005829]; cytosolic small ribosomal subunit [GO:0022627]; extracellular exosome [GO:0070062]; focal adhesion [GO:0005925]; membrane [GO:0016020]; nucleoplasm [GO:0005654]; nucleus [GO:0005634]; cadherin binding [GO:0045296]; enzyme binding [GO:0019899]; fibroblast growth factor binding [GO:0017134]; mRNA binding [GO:0003729]; RNA binding [GO:0003723]; structural constituent of ribosom…	3D-structure; Acetylation; Citrullination; Complete proteome; Direct protein sequencing; Isopeptide bond; Phosphoprotein; Reference proteome; Repeat; Ribonucleoprotein; Ribosomal protein; Ubl conjugation		31324	31
RPB7_HUMAN	TRUE	-0.0674089	0.0461347	POLR2G	POLR2G RPB7	DNA-directed RNA polymerase II subunit RPB7	-2.12614	-1.92414	0.0671592	0.270572	0.310192	2.35568	20	0.0186794	0.00603116	0.00736394	172	DNA-directed RNA polymerase II, core complex [GO:0005665]; nucleoplasm [GO:0005654]; nucleus [GO:0005634]; P-body [GO:0000932]; DNA-directed 5'-3' RNA polymerase activity [GO:0003899]; single-stranded DNA binding [GO:0003697]; single-stranded RNA binding [GO:0003727]; translation initiation factor binding [GO:0031369]; 7-methylguanosine mRNA capping [GO:0006370]; apoptotic process [GO:0006915]; f…	DNA-directed RNA polymerase II, core complex [GO:0005665]; nucleoplasm [GO:0005654]; nucleus [GO:0005634]; P-body [GO:0000932]; DNA-directed 5'-3' RNA polymerase activity [GO:0003899]; single-stranded DNA binding [GO:0003697]; single-stranded RNA binding [GO:0003727]; translation initiation factor binding [GO:0031369]; 7-methylguanosine mRNA capping [GO:0006370]; apoptotic process [GO:0006915]; f…	DNA-directed RNA polymerase II, core complex [GO:0005665]; nucleoplasm [GO:0005654]; nucleus [GO:0005634]; P-body [GO:0000932]; DNA-directed 5'-3' RNA polymerase activity [GO:0003899]; single-stranded DNA binding [GO:0003697]; single-stranded RNA binding [GO:0003727]; translation initiation factor binding [GO:0031369]; 7-methylguanosine mRNA capping [GO:0006370]; apoptotic process [GO:0006915]; f…	3D-structure; Complete proteome; DNA-directed RNA polymerase; Nucleus; RNA-binding; Reference proteome; Transcription	DNA-dependent RNA polymerase catalyzes the transcription of DNA into RNA using the four ribonucleoside triphosphates as substrates. Component of RNA polymerase II which synthesizes mRNA precursors and many functional non-coding RNAs. Pol II is the central component of the basal RNA polymerase II transcription machinery. It is composed of mobile elements that move relative to each other. RPB7 is p…	19294	19
RHOQ_HUMAN	TRUE	-0.138586	0.0474635	RHOQ	NA	NA	-2.112	-2.14351	0.0431975	0.272684	0.26156	2.35568	20	0.0186794	0.0258346	0.0250807	NA	NA	NA	NA	NA	NA	NA	NA
RFA3_HUMAN	TRUE	-0.0839903	0.00368923	RPA3	RPA3 REPA3 RPA14	Replication protein A 14 kDa subunit	-3.28646	-2.78065	0.010804	0.12239	0.150594	2.35568	20	0.0186794	0.00391879	0.00547416	121	DNA replication factor A complex [GO:0005662]; nucleoplasm [GO:0005654]; damaged DNA binding [GO:0003684]; single-stranded DNA binding [GO:0003697]; base-excision repair [GO:0006284]; DNA damage response, detection of DNA damage [GO:0042769]; DNA replication [GO:0006260]; double-strand break repair via homologous recombination [GO:0000724]; error-free translesion synthesis [GO:0070987]; error-pro…	DNA replication factor A complex [GO:0005662]; nucleoplasm [GO:0005654]; damaged DNA binding [GO:0003684]; single-stranded DNA binding [GO:0003697]; base-excision repair [GO:0006284]; DNA damage response, detection of DNA damage [GO:0042769]; DNA replication [GO:0006260]; double-strand break repair via homologous recombination [GO:0000724]; error-free translesion synthesis [GO:0070987]; error-pro…	DNA replication factor A complex [GO:0005662]; nucleoplasm [GO:0005654]; damaged DNA binding [GO:0003684]; single-stranded DNA binding [GO:0003697]; base-excision repair [GO:0006284]; DNA damage response, detection of DNA damage [GO:0042769]; DNA replication [GO:0006260]; double-strand break repair via homologous recombination [GO:0000724]; error-free translesion synthesis [GO:0070987]; error-pro…	3D-structure; Acetylation; Complete proteome; DNA damage; DNA recombination; DNA repair; DNA replication; Nucleus; Reference proteome	As part of the heterotrimeric replication protein A complex (RPA/RP-A), binds and stabilizes single-stranded DNA intermediates that form during DNA replication or upon DNA stress. It prevents their reannealing and in parallel, recruits and activates different proteins and complexes involved in DNA metabolism. Thereby, it plays an essential role both in DNA replication and the cellular response to…	13569	14
RCN2_HUMAN	TRUE	-0.078464	0.0163544	RCN2	RCN2 ERC55	Reticulocalbin-2	-2.62131	-2.33455	0.0289372	0.175569	0.219124	2.35568	20	0.0186794	0.00537595	0.00677777	317	endoplasmic reticulum [GO:0005783]; endoplasmic reticulum lumen [GO:0005788]; nucleolus [GO:0005730]; calcium ion binding [GO:0005509]	endoplasmic reticulum [GO:0005783]; endoplasmic reticulum lumen [GO:0005788]; nucleolus [GO:0005730]; calcium ion binding [GO:0005509]	endoplasmic reticulum [GO:0005783]; endoplasmic reticulum lumen [GO:0005788]; nucleolus [GO:0005730]; calcium ion binding [GO:0005509]	Alternative splicing; Calcium; Complete proteome; Direct protein sequencing; Endoplasmic reticulum; Metal-binding; Phosphoprotein; Reference proteome; Repeat; Signal	Not known. Binds calcium.	36876	37
RBM4_HUMAN	TRUE	-0.0991068	0.0478296	RBM4	RBM4 RBM4A	RNA-binding protein 4	-2.10816	-2.06419	0.0507944	0.273534	0.278971	2.35568	20	0.0186794	0.0132602	0.0138312	364	cytoplasm [GO:0005737]; cytoplasmic stress granule [GO:0010494]; cytosol [GO:0005829]; nuclear speck [GO:0016607]; nucleolus [GO:0005730]; nucleoplasm [GO:0005654]; nucleus [GO:0005634]	cyclin binding [GO:0030332]; miRNA binding [GO:0035198]; mRNA 3'-UTR binding [GO:0003730]; mRNA binding [GO:0003729]; pre-mRNA intronic binding [GO:0097157]; pre-mRNA intronic pyrimidine-rich binding [GO:0097158]; RNA binding [GO:0003723]; zinc ion binding [GO:0008270]	cap-independent translational initiation [GO:0002190]; cell differentiation [GO:0030154]; circadian regulation of translation [GO:0097167]; entrainment of circadian clock by photoperiod [GO:0043153]; IRES-dependent translational initiation of linear mRNA [GO:0002192]; miRNA mediated inhibition of translation [GO:0035278]; mRNA processing [GO:0006397]; negative regulation of translation [GO:001714…	3D-structure; Activator; Alternative splicing; Complete proteome; Cytoplasm; Differentiation; Isopeptide bond; Metal-binding; Nucleus; Phosphoprotein; RNA-binding; RNA-mediated gene silencing; Reference proteome; Repeat; Ubl conjugation; Zinc; Zinc-finger; mRNA processing; mRNA splicing	RNA-binding factor involved in multiple aspects of cellular processes like alternative splicing of pre-mRNA and translation regulation. Modulates alternative 5'-splice site and exon selection. Acts as a muscle cell differentiation-promoting factor. Activates exon skipping of the PTB pre-mRNA during muscle cell differentiation. Antagonizes the activity of the splicing factor PTBP1 to modulate musc…	40314	40
RASA1_HUMAN	TRUE	-0.158152	0.0305126	RASA1	NA	NA	-2.42682	-2.40849	0.0289997	0.225664	0.219124	2.35568	13	0.0186794	0.0169878	0.0172473	NA	NA	NA	NA	NA	NA	NA	NA
RANB9_HUMAN	TRUE	-0.147734	0.00921999	RANBP9	RANBP9 RANBPM	Ran-binding protein 9	-2.88184	-2.85421	0.00913247	0.142611	0.141556	2.35568	20	0.0186794	0.0157679	0.0160747	729	cytoplasm [GO:0005737]; cytosol [GO:0005829]; microtubule associated complex [GO:0005875]; nucleus [GO:0005634]; plasma membrane [GO:0005886]; enzyme binding [GO:0019899]; Ran GTPase binding [GO:0008536]; Ras guanyl-nucleotide exchange factor activity [GO:0005088]; axon guidance [GO:0007411]; MAPK cascade [GO:0000165]; microtubule nucleation [GO:0007020]; negative regulation of ERK1 and ERK2 casc…	cytoplasm [GO:0005737]; cytosol [GO:0005829]; microtubule associated complex [GO:0005875]; nucleus [GO:0005634]; plasma membrane [GO:0005886]; enzyme binding [GO:0019899]; Ran GTPase binding [GO:0008536]; Ras guanyl-nucleotide exchange factor activity [GO:0005088]; axon guidance [GO:0007411]; MAPK cascade [GO:0000165]; microtubule nucleation [GO:0007020]; negative regulation of ERK1 and ERK2 casc…	cytoplasm [GO:0005737]; cytosol [GO:0005829]; microtubule associated complex [GO:0005875]; nucleus [GO:0005634]; plasma membrane [GO:0005886]; enzyme binding [GO:0019899]; Ran GTPase binding [GO:0008536]; Ras guanyl-nucleotide exchange factor activity [GO:0005088]; axon guidance [GO:0007411]; MAPK cascade [GO:0000165]; microtubule nucleation [GO:0007020]; negative regulation of ERK1 and ERK2 casc…	3D-structure; Acetylation; Alternative splicing; Cell membrane; Complete proteome; Cytoplasm; Membrane; Nucleus; Phosphoprotein; Reference proteome; Ubl conjugation	May act as an adapter protein to couple membrane receptors to intracellular signaling pathways. May be involved in signaling of ITGB2/LFA-1 and other integrins. Enhances HGF-MET signaling by recruiting Sos and activating the Ras pathway. Enhances dihydrotestosterone-induced transactivation activity of AR, as well as dexamethasone-induced transactivation activity of NR3C1, but not affect estrogen-…	77847	78
RAE1L_HUMAN	TRUE	-0.070388	0.0451066	RAE1	RAE1 MRNP41	mRNA export factor	-2.13734	-1.95348	0.06339	0.267066	0.300136	2.35568	20	0.0186794	0.00650731	0.00778992	368	cytoplasm [GO:0005737]; fibrillar center [GO:0001650]; nuclear envelope [GO:0005635]; nuclear pore [GO:0005643]; nucleus [GO:0005634]; microtubule binding [GO:0008017]; RNA binding [GO:0003723]; cellular response to organic cyclic compound [GO:0071407]; gene silencing by RNA [GO:0031047]; intracellular transport of virus [GO:0075733]; mitotic nuclear envelope disassembly [GO:0007077]; mRNA export…	cytoplasm [GO:0005737]; fibrillar center [GO:0001650]; nuclear envelope [GO:0005635]; nuclear pore [GO:0005643]; nucleus [GO:0005634]; microtubule binding [GO:0008017]; RNA binding [GO:0003723]; cellular response to organic cyclic compound [GO:0071407]; gene silencing by RNA [GO:0031047]; intracellular transport of virus [GO:0075733]; mitotic nuclear envelope disassembly [GO:0007077]; mRNA export…	cytoplasm [GO:0005737]; fibrillar center [GO:0001650]; nuclear envelope [GO:0005635]; nuclear pore [GO:0005643]; nucleus [GO:0005634]; microtubule binding [GO:0008017]; RNA binding [GO:0003723]; cellular response to organic cyclic compound [GO:0071407]; gene silencing by RNA [GO:0031047]; intracellular transport of virus [GO:0075733]; mitotic nuclear envelope disassembly [GO:0007077]; mRNA export…	3D-structure; Complete proteome; Cytoplasm; Nucleus; Phosphoprotein; Reference proteome; Repeat; WD repeat	Binds mRNA. May function in nucleocytoplasmic transport and in directly or indirectly attaching cytoplasmic mRNPs to the cytoskeleton.	40968	41
RAC1_HUMAN	TRUE	-0.0462749	0.0236338	RAC1	RAC1 TC25 MIG5	Ras-related C3 botulinum toxin substrate 1	-2.44967	-1.81885	0.0823574	0.202952	0.337925	2.35568	20	0.0186794	0.00214105	0.00388374	192	cytoplasm [GO:0005737]; cytoplasmic ribonucleoprotein granule [GO:0036464]; cytosol [GO:0005829]; dendritic spine [GO:0043197]; early endosome membrane [GO:0031901]; endoplasmic reticulum membrane [GO:0005789]; extracellular exosome [GO:0070062]; extracellular matrix [GO:0031012]; extrinsic component of plasma membrane [GO:0019897]; ficolin-1-rich granule membrane [GO:0101003]; focal adhesion [GO…	cytoplasm [GO:0005737]; cytoplasmic ribonucleoprotein granule [GO:0036464]; cytosol [GO:0005829]; dendritic spine [GO:0043197]; early endosome membrane [GO:0031901]; endoplasmic reticulum membrane [GO:0005789]; extracellular exosome [GO:0070062]; extracellular matrix [GO:0031012]; extrinsic component of plasma membrane [GO:0019897]; ficolin-1-rich granule membrane [GO:0101003]; focal adhesion [GO…	cytoplasm [GO:0005737]; cytoplasmic ribonucleoprotein granule [GO:0036464]; cytosol [GO:0005829]; dendritic spine [GO:0043197]; early endosome membrane [GO:0031901]; endoplasmic reticulum membrane [GO:0005789]; extracellular exosome [GO:0070062]; extracellular matrix [GO:0031012]; extrinsic component of plasma membrane [GO:0019897]; ficolin-1-rich granule membrane [GO:0101003]; focal adhesion [GO…	3D-structure; ADP-ribosylation; Alternative splicing; Cell membrane; Complete proteome; Cytoplasm; GTP-binding; Glycoprotein; Isopeptide bond; Lipoprotein; Membrane; Methylation; Nucleotide-binding; Phosphoprotein; Polymorphism; Prenylation; Reference proteome; Ubl conjugation	Plasma membrane-associated small GTPase which cycles between active GTP-bound and inactive GDP-bound states. In its active state, binds to a variety of effector proteins to regulate cellular responses such as secretory processes, phagocytosis of apoptotic cells, epithelial cell polarization and growth-factor induced formation of membrane ruffles. Rac1 p21/rho GDI heterodimer is the active compone…	21450	21
PURA_HUMAN	TRUE	-0.0645068	0.00438444	PURA	PURA PUR1	Transcriptional activator protein Pur-alpha	-3.21103	-2.45734	0.0222066	0.124992	0.195963	2.35568	20	0.0186794	0.00242144	0.00413459	322	cytoplasm [GO:0005737]; dendrite [GO:0030425]; DNA replication factor A complex [GO:0005662]; neuronal cell body [GO:0043025]; nuclear chromosome, telomeric region [GO:0000784]; nucleus [GO:0005634]; double-stranded telomeric DNA binding [GO:0003691]; purine-rich negative regulatory element binding [GO:0032422]; RNA binding [GO:0003723]; single-stranded DNA binding [GO:0003697]; SMAD binding [GO:…	cytoplasm [GO:0005737]; dendrite [GO:0030425]; DNA replication factor A complex [GO:0005662]; neuronal cell body [GO:0043025]; nuclear chromosome, telomeric region [GO:0000784]; nucleus [GO:0005634]; double-stranded telomeric DNA binding [GO:0003691]; purine-rich negative regulatory element binding [GO:0032422]; RNA binding [GO:0003723]; single-stranded DNA binding [GO:0003697]; SMAD binding [GO:…	cytoplasm [GO:0005737]; dendrite [GO:0030425]; DNA replication factor A complex [GO:0005662]; neuronal cell body [GO:0043025]; nuclear chromosome, telomeric region [GO:0000784]; nucleus [GO:0005634]; double-stranded telomeric DNA binding [GO:0003691]; purine-rich negative regulatory element binding [GO:0032422]; RNA binding [GO:0003723]; single-stranded DNA binding [GO:0003697]; SMAD binding [GO:…	Acetylation; Activator; Complete proteome; DNA-binding; Disease mutation; Mental retardation; Nucleus; Phosphoprotein; Reference proteome; Transcription; Transcription regulation	This is a probable transcription activator that specifically binds the purine-rich single strand of the PUR element located upstream of the MYC gene. May play a role in the initiation of DNA replication and in recombination.	34911	35
PTBP2_HUMAN	TRUE	-0.0992437	0.00871467	PTBP2	PTBP2 NPTB PTB PTBLP	Polypyrimidine tract-binding protein 2	-2.9071	-2.68063	0.0135466	0.142242	0.160377	2.35568	20	0.0186794	0.00699256	0.00822403	531	growth cone [GO:0030426]; neuronal cell body [GO:0043025]; spliceosomal complex [GO:0005681]; mRNA binding [GO:0003729]; pre-mRNA binding [GO:0036002]; RNA binding [GO:0003723]; cerebellum development [GO:0021549]; mRNA splice site selection [GO:0006376]; negative regulation of RNA splicing [GO:0033119]; regulation of neural precursor cell proliferation [GO:2000177]; spinal cord development [GO:0…	growth cone [GO:0030426]; neuronal cell body [GO:0043025]; spliceosomal complex [GO:0005681]; mRNA binding [GO:0003729]; pre-mRNA binding [GO:0036002]; RNA binding [GO:0003723]; cerebellum development [GO:0021549]; mRNA splice site selection [GO:0006376]; negative regulation of RNA splicing [GO:0033119]; regulation of neural precursor cell proliferation [GO:2000177]; spinal cord development [GO:0…	growth cone [GO:0030426]; neuronal cell body [GO:0043025]; spliceosomal complex [GO:0005681]; mRNA binding [GO:0003729]; pre-mRNA binding [GO:0036002]; RNA binding [GO:0003723]; cerebellum development [GO:0021549]; mRNA splice site selection [GO:0006376]; negative regulation of RNA splicing [GO:0033119]; regulation of neural precursor cell proliferation [GO:2000177]; spinal cord development [GO:0…	3D-structure; Acetylation; Alternative splicing; Complete proteome; Direct protein sequencing; Nucleus; Phosphoprotein; RNA-binding; Reference proteome; Repeat; mRNA processing; mRNA splicing	RNA-binding protein which binds to intronic polypyrimidine tracts and mediates negative regulation of exons splicing. May antagonize in a tissue-specific manner the ability of NOVA1 to activate exon selection. In addition to its function in pre-mRNA splicing, plays also a role in the regulation of translation. Isoform 5 has a reduced affinity for RNA. {ECO:0000269|PubMed:11003644, ECO:0000269|Pub…	57491	57
PSA2_HUMAN	TRUE	-0.028871	0.0451075	PSMA2	PSMA2 HC3 PSC3	Proteasome subunit alpha type-2	-2.13733	-1.30255	0.205989	0.267066	0.477284	2.35568	20	0.0186794	0.00109479	0.00294773	234	cytosol [GO:0005829]; extracellular exosome [GO:0070062]; extracellular region [GO:0005576]; ficolin-1-rich granule lumen [GO:1904813]; nucleoplasm [GO:0005654]; nucleus [GO:0005634]; P-body [GO:0000932]; proteasome complex [GO:0000502]; proteasome core complex [GO:0005839]; proteasome core complex, alpha-subunit complex [GO:0019773]; secretory granule lumen [GO:0034774]; threonine-type endopepti…	cytosol [GO:0005829]; extracellular exosome [GO:0070062]; extracellular region [GO:0005576]; ficolin-1-rich granule lumen [GO:1904813]; nucleoplasm [GO:0005654]; nucleus [GO:0005634]; P-body [GO:0000932]; proteasome complex [GO:0000502]; proteasome core complex [GO:0005839]; proteasome core complex, alpha-subunit complex [GO:0019773]; secretory granule lumen [GO:0034774]; threonine-type endopepti…	cytosol [GO:0005829]; extracellular exosome [GO:0070062]; extracellular region [GO:0005576]; ficolin-1-rich granule lumen [GO:1904813]; nucleoplasm [GO:0005654]; nucleus [GO:0005634]; P-body [GO:0000932]; proteasome complex [GO:0000502]; proteasome core complex [GO:0005839]; proteasome core complex, alpha-subunit complex [GO:0019773]; secretory granule lumen [GO:0034774]; threonine-type endopepti…	3D-structure; Acetylation; Complete proteome; Cytoplasm; Direct protein sequencing; Hydrolase; Nucleus; Phosphoprotein; Polymorphism; Protease; Proteasome; Reference proteome; Threonine protease	Component of the 20S core proteasome complex involved in the proteolytic degradation of most intracellular proteins. This complex plays numerous essential roles within the cell by associating with different regulatory particles. Associated with two 19S regulatory particles, forms the 26S proteasome and thus participates in the ATP-dependent degradation of ubiquitinated proteins. The 26S proteasom…	25899	26
PRIO_HUMAN	TRUE	-0.162387	0.0400882	PRNP	NA	NA	-2.19558	-2.24718	0.0348177	0.256044	0.235161	2.35568	20	0.0186794	0.0328214	0.0313313	NA	NA	NA	NA	NA	NA	NA	NA
PRDX1_HUMAN	TRUE	-0.13374	0.00880998	PRDX1	NA	NA	-2.90223	-2.83349	0.00957655	0.142242	0.144781	2.35568	20	0.0186794	0.0127411	0.0133668	NA	NA	NA	NA	NA	NA	NA	NA
PQBP1_HUMAN	TRUE	-0.0950854	0.0441047	PQBP1	NA	NA	-2.14848	-2.08471	0.0487215	0.264703	0.274664	2.35568	20	0.0186794	0.0117521	0.0124821	NA	NA	NA	NA	NA	NA	NA	NA
PP2BB_HUMAN	TRUE	-0.11677	0.024412	PPP3CB	PPP3CB CALNA2 CALNB CNA2	Serine/threonine-protein phosphatase 2B catalytic subunit beta isoform	-2.43437	-2.39031	0.025676	0.205705	0.208864	2.35568	20	0.0186794	0.0138051	0.0143187	524	calcineurin complex [GO:0005955]; cytosol [GO:0005829]; nucleoplasm [GO:0005654]; plasma membrane [GO:0005886]; T-tubule [GO:0030315]; Z disc [GO:0030018]; calcium ion binding [GO:0005509]; calmodulin binding [GO:0005516]; calmodulin-dependent protein phosphatase activity [GO:0033192]; drug binding [GO:0008144]; enzyme binding [GO:0019899]; protein dimerization activity [GO:0046983]; protein phos…	calcineurin complex [GO:0005955]; cytosol [GO:0005829]; nucleoplasm [GO:0005654]; plasma membrane [GO:0005886]; T-tubule [GO:0030315]; Z disc [GO:0030018]; calcium ion binding [GO:0005509]; calmodulin binding [GO:0005516]; calmodulin-dependent protein phosphatase activity [GO:0033192]; drug binding [GO:0008144]; enzyme binding [GO:0019899]; protein dimerization activity [GO:0046983]; protein phos…	calcineurin complex [GO:0005955]; cytosol [GO:0005829]; nucleoplasm [GO:0005654]; plasma membrane [GO:0005886]; T-tubule [GO:0030315]; Z disc [GO:0030018]; calcium ion binding [GO:0005509]; calmodulin binding [GO:0005516]; calmodulin-dependent protein phosphatase activity [GO:0033192]; drug binding [GO:0008144]; enzyme binding [GO:0019899]; protein dimerization activity [GO:0046983]; protein phos…	3D-structure; Acetylation; Alternative splicing; Calmodulin-binding; Complete proteome; Hydrolase; Iron; Metal-binding; Phosphoprotein; Protein phosphatase; Reference proteome; Zinc	Calcium-dependent, calmodulin-stimulated protein phosphatase. This subunit may have a role in the calmodulin activation of calcineurin.	59024	59
PKHM2_HUMAN	TRUE	-0.13383	0.0487629	PLEKHM2	NA	NA	-2.09851	-2.12493	0.0448788	0.276972	0.265169	2.35568	20	0.0186794	0.0244025	0.0237994	NA	NA	NA	NA	NA	NA	NA	NA
PKHA1_HUMAN	TRUE	-0.125412	0.0402599	PLEKHA1	NA	NA	-2.27811	-2.18909	0.044426	0.256044	0.265062	2.35568	13	0.0186794	0.0121225	0.0131284	NA	NA	NA	NA	NA	NA	NA	NA
PI42B_HUMAN	TRUE	-0.0875228	0.0258693	PIP4K2B	PIP4K2B PIP5K2B	Phosphatidylinositol 5-phosphate 4-kinase type-2 beta	-2.40692	-2.2516	0.0344962	0.212596	0.234069	2.35568	20	0.0186794	0.00793363	0.00906594	416	autophagosome [GO:0005776]; cytosol [GO:0005829]; endoplasmic reticulum membrane [GO:0005789]; nucleoplasm [GO:0005654]; plasma membrane [GO:0005886]; 1-phosphatidylinositol-3-phosphate 4-kinase activity [GO:0052811]; 1-phosphatidylinositol-4-phosphate 5-kinase activity [GO:0016308]; 1-phosphatidylinositol-5-phosphate 4-kinase activity [GO:0016309]; ATP binding [GO:0005524]; protein homodimerizat…	autophagosome [GO:0005776]; cytosol [GO:0005829]; endoplasmic reticulum membrane [GO:0005789]; nucleoplasm [GO:0005654]; plasma membrane [GO:0005886]; 1-phosphatidylinositol-3-phosphate 4-kinase activity [GO:0052811]; 1-phosphatidylinositol-4-phosphate 5-kinase activity [GO:0016308]; 1-phosphatidylinositol-5-phosphate 4-kinase activity [GO:0016309]; ATP binding [GO:0005524]; protein homodimerizat…	autophagosome [GO:0005776]; cytosol [GO:0005829]; endoplasmic reticulum membrane [GO:0005789]; nucleoplasm [GO:0005654]; plasma membrane [GO:0005886]; 1-phosphatidylinositol-3-phosphate 4-kinase activity [GO:0052811]; 1-phosphatidylinositol-4-phosphate 5-kinase activity [GO:0016308]; 1-phosphatidylinositol-5-phosphate 4-kinase activity [GO:0016309]; ATP binding [GO:0005524]; protein homodimerizat…	3D-structure; ATP-binding; Acetylation; Alternative splicing; Cell membrane; Complete proteome; Cytoplasm; Endoplasmic reticulum; Kinase; Membrane; Nucleotide-binding; Nucleus; Phosphoprotein; Reference proteome; Transferase; Ubl conjugation	Participates in the biosynthesis of phosphatidylinositol 4,5-bisphosphate. {ECO:0000269|PubMed:9038203}.	47378	47
PGAM5_HUMAN	TRUE	-0.105972	0.0275857	PGAM5	PGAM5	Serine/threonine-protein phosphatase PGAM5	-2.37636	-2.30857	0.0305825	0.215884	0.224531	2.35568	20	0.0186794	0.0119319	0.0126429	289	integral component of membrane [GO:0016021]; mitochondrial outer membrane [GO:0005741]; mitochondrion [GO:0005739]; GTPase activator activity [GO:0005096]; phosphatase activity [GO:0016791]; protein complex binding [GO:0032403]; signal transducer, downstream of receptor, with serine/threonine phosphatase activity [GO:0009400]; necroptotic process [GO:0070266]	integral component of membrane [GO:0016021]; mitochondrial outer membrane [GO:0005741]; mitochondrion [GO:0005739]; GTPase activator activity [GO:0005096]; phosphatase activity [GO:0016791]; protein complex binding [GO:0032403]; signal transducer, downstream of receptor, with serine/threonine phosphatase activity [GO:0009400]; necroptotic process [GO:0070266]	integral component of membrane [GO:0016021]; mitochondrial outer membrane [GO:0005741]; mitochondrion [GO:0005739]; GTPase activator activity [GO:0005096]; phosphatase activity [GO:0016791]; protein complex binding [GO:0032403]; signal transducer, downstream of receptor, with serine/threonine phosphatase activity [GO:0009400]; necroptotic process [GO:0070266]	3D-structure; Acetylation; Alternative splicing; Complete proteome; Hydrolase; Membrane; Mitochondrion; Mitochondrion outer membrane; Necrosis; Phosphoprotein; Reference proteome; Transmembrane; Transmembrane helix	Displays phosphatase activity for serine/threonine residues, and, dephosphorylates and activates MAP3K5 kinase. Has apparently no phosphoglycerate mutase activity. May be regulator of mitochondrial dynamics. Substrate for a KEAP1-dependent ubiquitin ligase complex. Contributes to the repression of NFE2L2-dependent gene expression. Acts as a central mediator for programmed necrosis induced by TNF,…	32004	32
PEBB_HUMAN	TRUE	-0.186554	0.0189049	CBFB	CBFB	Core-binding factor subunit beta	-2.55421	-2.61216	0.0157894	0.183709	0.171515	2.35568	20	0.0186794	0.0320073	0.0306029	182	membrane [GO:0016020]; nucleus [GO:0005634]; DNA binding [GO:0003677]; transcription coactivator activity [GO:0003713]; transcription factor activity, sequence-specific DNA binding [GO:0003700]; cell maturation [GO:0048469]; definitive hemopoiesis [GO:0060216]; lymphocyte differentiation [GO:0030098]; myeloid cell differentiation [GO:0030099]; osteoblast differentiation [GO:0001649]; positive reg…	membrane [GO:0016020]; nucleus [GO:0005634]; DNA binding [GO:0003677]; transcription coactivator activity [GO:0003713]; transcription factor activity, sequence-specific DNA binding [GO:0003700]; cell maturation [GO:0048469]; definitive hemopoiesis [GO:0060216]; lymphocyte differentiation [GO:0030098]; myeloid cell differentiation [GO:0030099]; osteoblast differentiation [GO:0001649]; positive reg…	membrane [GO:0016020]; nucleus [GO:0005634]; DNA binding [GO:0003677]; transcription coactivator activity [GO:0003713]; transcription factor activity, sequence-specific DNA binding [GO:0003700]; cell maturation [GO:0048469]; definitive hemopoiesis [GO:0060216]; lymphocyte differentiation [GO:0030098]; myeloid cell differentiation [GO:0030099]; osteoblast differentiation [GO:0001649]; positive reg…	3D-structure; Alternative splicing; Chromosomal rearrangement; Complete proteome; Nucleus; Phosphoprotein; Polymorphism; Proto-oncogene; Reference proteome	CBF binds to the core site, 5'-PYGPYGGT-3', of a number of enhancers and promoters, including murine leukemia virus, polyomavirus enhancer, T-cell receptor enhancers, LCK, IL3 and GM-CSF promoters. CBFB enhances DNA binding by RUNX1.	21508	22
PCBP4_HUMAN	TRUE	-0.126334	0.0125101	PCBP4	PCBP4	Poly	-2.74401	-2.67865	0.0136068	0.159493	0.160377	2.35568	20	0.0186794	0.012718	0.0133462	403	cytosol [GO:0005829]; intracellular ribonucleoprotein complex [GO:0030529]; DNA binding [GO:0003677]; mRNA 3'-UTR binding [GO:0003730]; RNA binding [GO:0003723]; DNA damage response, signal transduction by p53 class mediator resulting in cell cycle arrest [GO:0006977]; regulation of mRNA stability [GO:0043488]	cytosol [GO:0005829]; intracellular ribonucleoprotein complex [GO:0030529]; DNA binding [GO:0003677]; mRNA 3'-UTR binding [GO:0003730]; RNA binding [GO:0003723]; DNA damage response, signal transduction by p53 class mediator resulting in cell cycle arrest [GO:0006977]; regulation of mRNA stability [GO:0043488]	cytosol [GO:0005829]; intracellular ribonucleoprotein complex [GO:0030529]; DNA binding [GO:0003677]; mRNA 3'-UTR binding [GO:0003730]; RNA binding [GO:0003723]; DNA damage response, signal transduction by p53 class mediator resulting in cell cycle arrest [GO:0006977]; regulation of mRNA stability [GO:0043488]	Alternative splicing; Complete proteome; Cytoplasm; DNA-binding; Polymorphism; RNA-binding; Reference proteome; Repeat; Ribonucleoprotein	Single-stranded nucleic acid binding protein that binds preferentially to oligo dC. {ECO:0000250}.	41482	41
OGFD2_HUMAN	TRUE	-0.462146	0.0163358	OGFOD2	NA	NA	-3.30353	-3.57768	0.00671576	0.175569	0.131675	2.35568	6	0.0186794	0.0391409	0.0333723	NA	NA	NA	NA	NA	NA	NA	NA
NUP54_HUMAN	TRUE	-0.123069	0.00275979	NUP54	NUP54	Nucleoporin p54	-3.41263	-3.18663	0.00420662	0.117724	0.115884	2.35568	20	0.0186794	0.0078032	0.00894925	507	nuclear envelope [GO:0005635]; nuclear membrane [GO:0031965]; nuclear pore central transport channel [GO:0044613]; nucleocytoplasmic transporter activity [GO:0005487]; structural constituent of nuclear pore [GO:0017056]; gene silencing by RNA [GO:0031047]; intracellular transport of virus [GO:0075733]; mitotic nuclear envelope disassembly [GO:0007077]; mRNA export from nucleus [GO:0006406]; NLS-b…	nuclear envelope [GO:0005635]; nuclear membrane [GO:0031965]; nuclear pore central transport channel [GO:0044613]; nucleocytoplasmic transporter activity [GO:0005487]; structural constituent of nuclear pore [GO:0017056]; gene silencing by RNA [GO:0031047]; intracellular transport of virus [GO:0075733]; mitotic nuclear envelope disassembly [GO:0007077]; mRNA export from nucleus [GO:0006406]; NLS-b…	nuclear envelope [GO:0005635]; nuclear membrane [GO:0031965]; nuclear pore central transport channel [GO:0044613]; nucleocytoplasmic transporter activity [GO:0005487]; structural constituent of nuclear pore [GO:0017056]; gene silencing by RNA [GO:0031047]; intracellular transport of virus [GO:0075733]; mitotic nuclear envelope disassembly [GO:0007077]; mRNA export from nucleus [GO:0006406]; NLS-b…	3D-structure; Alternative splicing; Complete proteome; Glycoprotein; Membrane; Nuclear pore complex; Nucleus; Protein transport; Reference proteome; Repeat; Translocation; Transport; mRNA transport	Component of the nuclear pore complex, a complex required for the trafficking across the nuclear membrane. {ECO:0000250|UniProtKB:P70582}.	55435	55
NU160_HUMAN	TRUE	-0.083984	0.0433602	NUP160	NUP160 KIAA0197 NUP120	Nuclear pore complex protein Nup160	-2.15691	-2.04632	0.0526624	0.263318	0.282643	2.35568	20	0.0186794	0.00909665	0.0101064	1436	cytosol [GO:0005829]; nuclear envelope [GO:0005635]; nuclear pore [GO:0005643]; nuclear pore outer ring [GO:0031080]; nucleocytoplasmic transporter activity [GO:0005487]; gene silencing by RNA [GO:0031047]; intracellular transport of virus [GO:0075733]; mitotic nuclear envelope disassembly [GO:0007077]; mRNA export from nucleus [GO:0006406]; protein sumoylation [GO:0016925]; regulation of cellula…	cytosol [GO:0005829]; nuclear envelope [GO:0005635]; nuclear pore [GO:0005643]; nuclear pore outer ring [GO:0031080]; nucleocytoplasmic transporter activity [GO:0005487]; gene silencing by RNA [GO:0031047]; intracellular transport of virus [GO:0075733]; mitotic nuclear envelope disassembly [GO:0007077]; mRNA export from nucleus [GO:0006406]; protein sumoylation [GO:0016925]; regulation of cellula…	cytosol [GO:0005829]; nuclear envelope [GO:0005635]; nuclear pore [GO:0005643]; nuclear pore outer ring [GO:0031080]; nucleocytoplasmic transporter activity [GO:0005487]; gene silencing by RNA [GO:0031047]; intracellular transport of virus [GO:0075733]; mitotic nuclear envelope disassembly [GO:0007077]; mRNA export from nucleus [GO:0006406]; protein sumoylation [GO:0016925]; regulation of cellula…	3D-structure; Alternative splicing; Complete proteome; Nuclear pore complex; Nucleus; Phosphoprotein; Polymorphism; Protein transport; Reference proteome; Translocation; Transport; mRNA transport	Involved in poly(A)+ RNA transport. {ECO:0000269|PubMed:11684705}.	162121	162
NU153_HUMAN	TRUE	-0.0511979	0.0397592	NUP153	NUP153	Nuclear pore complex protein Nup153	-2.19962	-1.79589	0.0860409	0.254843	0.344826	2.35568	20	0.0186794	0.00325057	0.00487635	1475	cytosol [GO:0005829]; nuclear inclusion body [GO:0042405]; nuclear membrane [GO:0031965]; nuclear periphery [GO:0034399]; nuclear pore [GO:0005643]; nuclear pore nuclear basket [GO:0044615]; nucleolus [GO:0005730]; nucleoplasm [GO:0005654]; DNA binding [GO:0003677]; identical protein binding [GO:0042802]; nuclear localization sequence binding [GO:0008139]; nucleocytoplasmic transporter activity […	cytosol [GO:0005829]; nuclear inclusion body [GO:0042405]; nuclear membrane [GO:0031965]; nuclear periphery [GO:0034399]; nuclear pore [GO:0005643]; nuclear pore nuclear basket [GO:0044615]; nucleolus [GO:0005730]; nucleoplasm [GO:0005654]; DNA binding [GO:0003677]; identical protein binding [GO:0042802]; nuclear localization sequence binding [GO:0008139]; nucleocytoplasmic transporter activity […	cytosol [GO:0005829]; nuclear inclusion body [GO:0042405]; nuclear membrane [GO:0031965]; nuclear periphery [GO:0034399]; nuclear pore [GO:0005643]; nuclear pore nuclear basket [GO:0044615]; nucleolus [GO:0005730]; nucleoplasm [GO:0005654]; DNA binding [GO:0003677]; identical protein binding [GO:0042802]; nuclear localization sequence binding [GO:0008139]; nucleocytoplasmic transporter activity […	3D-structure; Acetylation; Alternative splicing; Complete proteome; DNA-binding; Direct protein sequencing; Glycoprotein; Host-virus interaction; Isopeptide bond; Membrane; Metal-binding; Nuclear pore complex; Nucleus; Phosphoprotein; Polymorphism; Protein transport; Reference proteome; Repeat; Translocation; Transport; Ubl conjugation; Viral penetration into host nucleus; Virus entry into host c…	Component of the nuclear pore complex (NPC), a complex required for the trafficking across the nuclear envelope. Functions as a scaffolding element in the nuclear phase of the NPC essential for normal nucleocytoplasmic transport of proteins and mRNAs. Involved in the quality control and retention of unspliced mRNAs in the nucleus; in association with TPR, regulates the nuclear export of unspliced…	153938	154
NU133_HUMAN	TRUE	-0.0734262	0.00186466	NUP133	NUP133	Nuclear pore complex protein Nup133	-3.582	-2.76742	0.0111339	0.112467	0.151959	2.35568	20	0.0186794	0.00252117	0.0042238	1156	condensed chromosome kinetochore [GO:0000777]; cytosol [GO:0005829]; membrane [GO:0016020]; nuclear envelope [GO:0005635]; nuclear membrane [GO:0031965]; nuclear pore [GO:0005643]; nuclear pore outer ring [GO:0031080]; nucleocytoplasmic transporter activity [GO:0005487]; structural constituent of nuclear pore [GO:0017056]; chromatin organization [GO:0006325]; gene silencing by RNA [GO:0031047]; i…	condensed chromosome kinetochore [GO:0000777]; cytosol [GO:0005829]; membrane [GO:0016020]; nuclear envelope [GO:0005635]; nuclear membrane [GO:0031965]; nuclear pore [GO:0005643]; nuclear pore outer ring [GO:0031080]; nucleocytoplasmic transporter activity [GO:0005487]; structural constituent of nuclear pore [GO:0017056]; chromatin organization [GO:0006325]; gene silencing by RNA [GO:0031047]; i…	condensed chromosome kinetochore [GO:0000777]; cytosol [GO:0005829]; membrane [GO:0016020]; nuclear envelope [GO:0005635]; nuclear membrane [GO:0031965]; nuclear pore [GO:0005643]; nuclear pore outer ring [GO:0031080]; nucleocytoplasmic transporter activity [GO:0005487]; structural constituent of nuclear pore [GO:0017056]; chromatin organization [GO:0006325]; gene silencing by RNA [GO:0031047]; i…	3D-structure; Acetylation; Centromere; Chromosome; Complete proteome; Kinetochore; Methylation; Nuclear pore complex; Nucleus; Phosphoprotein; Polymorphism; Protein transport; Reference proteome; Translocation; Transport; mRNA transport	Involved in poly(A)+ RNA transport. {ECO:0000269|PubMed:11684705}.	128979	129
NHEJ1_HUMAN	TRUE	-0.182077	5.3e-05	NHEJ1	NHEJ1 XLF	Non-homologous end-joining factor 1	-5.11291	-4.76097	9.05e-05	0.0520223	0.0544057	2.35568	20	0.0186794	0.00760893	0.00877546	299	DNA ligase IV complex [GO:0032807]; fibrillar center [GO:0001650]; nonhomologous end joining complex [GO:0070419]; nucleoplasm [GO:0005654]; nucleus [GO:0005634]; DNA end binding [GO:0045027]; B cell differentiation [GO:0030183]; central nervous system development [GO:0007417]; double-strand break repair via nonhomologous end joining [GO:0006303]; positive regulation of ligase activity [GO:005135…	DNA ligase IV complex [GO:0032807]; fibrillar center [GO:0001650]; nonhomologous end joining complex [GO:0070419]; nucleoplasm [GO:0005654]; nucleus [GO:0005634]; DNA end binding [GO:0045027]; B cell differentiation [GO:0030183]; central nervous system development [GO:0007417]; double-strand break repair via nonhomologous end joining [GO:0006303]; positive regulation of ligase activity [GO:005135…	DNA ligase IV complex [GO:0032807]; fibrillar center [GO:0001650]; nonhomologous end joining complex [GO:0070419]; nucleoplasm [GO:0005654]; nucleus [GO:0005634]; DNA end binding [GO:0045027]; B cell differentiation [GO:0030183]; central nervous system development [GO:0007417]; double-strand break repair via nonhomologous end joining [GO:0006303]; positive regulation of ligase activity [GO:005135…	3D-structure; Alternative splicing; Chromosomal rearrangement; Coiled coil; Complete proteome; DNA damage; DNA repair; DNA-binding; Disease mutation; Nucleus; Phosphoprotein; Polymorphism; Reference proteome; SCID	DNA repair protein involved in DNA nonhomologous end joining (NHEJ) required for double-strand break (DSB) repair and V(D)J recombination. May serve as a bridge between XRCC4 and the other NHEJ factors located at DNA ends, or may participate in reconfiguration of the end bound NHEJ factors to allow XRCC4 access to the DNA termini. It may act in concert with XRCC6/XRCC5 (Ku) to stimulate XRCC4-med…	33337	33
NEPR1_HUMAN	TRUE	-0.313387	0.0164027	CNEP1R1	NA	NA	-2.75429	-2.90017	0.0107842	0.175569	0.150594	2.35568	13	0.0186794	0.0517847	0.0467061	NA	NA	NA	NA	NA	NA	NA	NA
NCAM1_HUMAN	TRUE	-0.19946	0.0435724	NCAM1	NCAM1 NCAM	Neural cell adhesion molecule 1	-2.15449	-2.23062	0.0360481	0.263318	0.2401	2.35568	20	0.0186794	0.051425	0.0479745	858	anchored component of membrane [GO:0031225]; cell surface [GO:0009986]; cytosol [GO:0005829]; external side of plasma membrane [GO:0009897]; extracellular exosome [GO:0070062]; Golgi membrane [GO:0000139]; integral component of membrane [GO:0016021]; membrane [GO:0016020]; plasma membrane [GO:0005886]; identical protein binding [GO:0042802]; Ras guanyl-nucleotide exchange factor activity [GO:0005…	anchored component of membrane [GO:0031225]; cell surface [GO:0009986]; cytosol [GO:0005829]; external side of plasma membrane [GO:0009897]; extracellular exosome [GO:0070062]; Golgi membrane [GO:0000139]; integral component of membrane [GO:0016021]; membrane [GO:0016020]; plasma membrane [GO:0005886]; identical protein binding [GO:0042802]; Ras guanyl-nucleotide exchange factor activity [GO:0005…	anchored component of membrane [GO:0031225]; cell surface [GO:0009986]; cytosol [GO:0005829]; external side of plasma membrane [GO:0009897]; extracellular exosome [GO:0070062]; Golgi membrane [GO:0000139]; integral component of membrane [GO:0016021]; membrane [GO:0016020]; plasma membrane [GO:0005886]; identical protein binding [GO:0042802]; Ras guanyl-nucleotide exchange factor activity [GO:0005…	3D-structure; Alternative splicing; Cell adhesion; Cell membrane; Complete proteome; Disulfide bond; GPI-anchor; Glycoprotein; Host cell receptor for virus entry; Host-virus interaction; Immunoglobulin domain; Lipoprotein; Membrane; Phosphoprotein; Polymorphism; Receptor; Reference proteome; Repeat; Secreted; Signal; Transmembrane; Transmembrane helix	This protein is a cell adhesion molecule involved in neuron-neuron adhesion, neurite fasciculation, outgrowth of neurites, etc.; (Microbial infection) Acts as a receptor for rabies virus. {ECO:0000269|PubMed:9696812}.	94574	95
NADAP_HUMAN	TRUE	-0.268496	0.00854701	SLC4A1AP	SLC4A1AP HLC3	Kanadaptin	-2.9158	-3.01817	0.00624926	0.141794	0.130026	2.35568	20	0.0186794	0.050876	0.0474834	796	cytoplasm [GO:0005737]; intracellular membrane-bounded organelle [GO:0043231]; nucleoplasm [GO:0005654]; plasma membrane [GO:0005886]; mRNA binding [GO:0003729]	cytoplasm [GO:0005737]; intracellular membrane-bounded organelle [GO:0043231]; nucleoplasm [GO:0005654]; plasma membrane [GO:0005886]; mRNA binding [GO:0003729]	cytoplasm [GO:0005737]; intracellular membrane-bounded organelle [GO:0043231]; nucleoplasm [GO:0005654]; plasma membrane [GO:0005886]; mRNA binding [GO:0003729]	3D-structure; Coiled coil; Complete proteome; Cytoplasm; Nucleus; Phosphoprotein; Polymorphism; Reference proteome		88814	89
MYL1_HUMAN	TRUE	-0.191156	0.0414917	MYL1	MYL1	Myosin light chain 1/3, skeletal muscle isoform	-2.17865	-2.25041	0.0345822	0.258842	0.234172	2.35568	20	0.0186794	0.0461904	0.0432915	194	cytosol [GO:0005829]; muscle myosin complex [GO:0005859]; myofibril [GO:0030016]; sarcomere [GO:0030017]; calcium ion binding [GO:0005509]; structural constituent of muscle [GO:0008307]; cardiac muscle contraction [GO:0060048]; muscle contraction [GO:0006936]; muscle filament sliding [GO:0030049]	cytosol [GO:0005829]; muscle myosin complex [GO:0005859]; myofibril [GO:0030016]; sarcomere [GO:0030017]; calcium ion binding [GO:0005509]; structural constituent of muscle [GO:0008307]; cardiac muscle contraction [GO:0060048]; muscle contraction [GO:0006936]; muscle filament sliding [GO:0030049]	cytosol [GO:0005829]; muscle myosin complex [GO:0005859]; myofibril [GO:0030016]; sarcomere [GO:0030017]; calcium ion binding [GO:0005509]; structural constituent of muscle [GO:0008307]; cardiac muscle contraction [GO:0060048]; muscle contraction [GO:0006936]; muscle filament sliding [GO:0030049]	Acetylation; Alternative splicing; Complete proteome; Methylation; Motor protein; Muscle protein; Myosin; Phosphoprotein; Reference proteome; Repeat	Regulatory light chain of myosin. Does not bind calcium.	21145	21
MYH2_HUMAN	TRUE	-0.266969	0.032072	MYH2	MYH2 MYHSA2	Myosin-2	-2.30412	-2.40344	0.0249594	0.232292	0.206233	2.35568	20	0.0186794	0.0805489	0.0740296	1941	A band [GO:0031672]; actomyosin contractile ring [GO:0005826]; cell-cell junction [GO:0005911]; cytosol [GO:0005829]; Golgi apparatus [GO:0005794]; muscle myosin complex [GO:0005859]; myofibril [GO:0030016]; myosin filament [GO:0032982]; protein complex [GO:0043234]; sarcomere [GO:0030017]; actin binding [GO:0003779]; ATP binding [GO:0005524]; calmodulin binding [GO:0005516]; microfilament motor …	A band [GO:0031672]; actomyosin contractile ring [GO:0005826]; cell-cell junction [GO:0005911]; cytosol [GO:0005829]; Golgi apparatus [GO:0005794]; muscle myosin complex [GO:0005859]; myofibril [GO:0030016]; myosin filament [GO:0032982]; protein complex [GO:0043234]; sarcomere [GO:0030017]; actin binding [GO:0003779]; ATP binding [GO:0005524]; calmodulin binding [GO:0005516]; microfilament motor …	A band [GO:0031672]; actomyosin contractile ring [GO:0005826]; cell-cell junction [GO:0005911]; cytosol [GO:0005829]; Golgi apparatus [GO:0005794]; muscle myosin complex [GO:0005859]; myofibril [GO:0030016]; myosin filament [GO:0032982]; protein complex [GO:0043234]; sarcomere [GO:0030017]; actin binding [GO:0003779]; ATP binding [GO:0005524]; calmodulin binding [GO:0005516]; microfilament motor …	ATP-binding; Actin-binding; Alternative splicing; Calmodulin-binding; Coiled coil; Complete proteome; Cytoplasm; Disease mutation; Isopeptide bond; Methylation; Motor protein; Muscle protein; Myosin; Nucleotide-binding; Phosphoprotein; Polymorphism; Reference proteome; Thick filament; Ubl conjugation	Muscle contraction. Required for cytoskeleton organization (By similarity). {ECO:0000250}.	223044	223
MTL26_HUMAN	TRUE	-0.131114	0.00243592	METTL26	NA	NA	-3.46667	-3.26992	0.00345225	0.112743	0.113342	2.35568	20	0.0186794	0.00858267	0.00964659	NA	NA	NA	NA	NA	NA	NA	NA
MLRS_HUMAN	TRUE	-0.316445	0.028008	MYLPF	MYLPF	Myosin regulatory light chain 2, skeletal muscle isoform	-2.36912	-2.4794	0.021163	0.216615	0.193209	2.35568	20	0.0186794	0.107047	0.0977355	169	cytosol [GO:0005829]; lysosomal membrane [GO:0005765]; muscle myosin complex [GO:0005859]; calcium ion binding [GO:0005509]; structural constituent of muscle [GO:0008307]; immune response [GO:0006955]; muscle contraction [GO:0006936]; skeletal muscle tissue development [GO:0007519]	cytosol [GO:0005829]; lysosomal membrane [GO:0005765]; muscle myosin complex [GO:0005859]; calcium ion binding [GO:0005509]; structural constituent of muscle [GO:0008307]; immune response [GO:0006955]; muscle contraction [GO:0006936]; skeletal muscle tissue development [GO:0007519]	cytosol [GO:0005829]; lysosomal membrane [GO:0005765]; muscle myosin complex [GO:0005859]; calcium ion binding [GO:0005509]; structural constituent of muscle [GO:0008307]; immune response [GO:0006955]; muscle contraction [GO:0006936]; skeletal muscle tissue development [GO:0007519]	Calcium; Complete proteome; Metal-binding; Methylation; Motor protein; Muscle protein; Myosin; Phosphoprotein; Reference proteome; Repeat		19015	19
MARK3_HUMAN	TRUE	-0.227866	0.00752388	MARK3	MARK3 CTAK1 EMK2	MAP/microtubule affinity-regulating kinase 3	-3.1601	-3.18508	0.00600147	0.138894	0.130026	2.35568	13	0.0186794	0.0207977	0.0204728	753	cytosol [GO:0005829]; extracellular exosome [GO:0070062]; plasma membrane [GO:0005886]; ATP binding [GO:0005524]; protein serine/threonine kinase activity [GO:0004674]; establishment of cell polarity [GO:0030010]; MAPK cascade [GO:0000165]; microtubule cytoskeleton organization [GO:0000226]	cytosol [GO:0005829]; extracellular exosome [GO:0070062]; plasma membrane [GO:0005886]; ATP binding [GO:0005524]; protein serine/threonine kinase activity [GO:0004674]; establishment of cell polarity [GO:0030010]; MAPK cascade [GO:0000165]; microtubule cytoskeleton organization [GO:0000226]	cytosol [GO:0005829]; extracellular exosome [GO:0070062]; plasma membrane [GO:0005886]; ATP binding [GO:0005524]; protein serine/threonine kinase activity [GO:0004674]; establishment of cell polarity [GO:0030010]; MAPK cascade [GO:0000165]; microtubule cytoskeleton organization [GO:0000226]	3D-structure; ATP-binding; Alternative splicing; Cell membrane; Complete proteome; Kinase; Membrane; Nucleotide-binding; Phosphoprotein; Polymorphism; Reference proteome; Serine/threonine-protein kinase; Transferase	Involved in the specific phosphorylation of microtubule-associated proteins for tau, MAP2 and MAP4. Phosphorylates CDC25C on 'Ser-216'. Regulates localization and activity of some histone deacetylases by mediating phosphorylation of HDAC7, promoting subsequent interaction between HDAC7 and 14-3-3 and export from the nucleus (PubMed:16980613). Negatively regulates the Hippo signaling pathway and a…	84489	84
MA7D1_HUMAN	TRUE	-0.144768	0.0407533	MAP7D1	MAP7D1 KIAA1187 PARCC1 RPRC1 PP2464	MAP7 domain-containing protein 1	-2.18749	-2.2216	0.0367354	0.25685	0.242328	2.35568	20	0.0186794	0.0262787	0.025478	841	cytosol [GO:0005829]; microtubule cytoskeleton [GO:0015630]; spindle [GO:0005819]; structural molecule activity [GO:0005198]; microtubule cytoskeleton organization [GO:0000226]	cytosol [GO:0005829]; microtubule cytoskeleton [GO:0015630]; spindle [GO:0005819]; structural molecule activity [GO:0005198]; microtubule cytoskeleton organization [GO:0000226]	cytosol [GO:0005829]; microtubule cytoskeleton [GO:0015630]; spindle [GO:0005819]; structural molecule activity [GO:0005198]; microtubule cytoskeleton organization [GO:0000226]	Alternative splicing; Coiled coil; Complete proteome; Cytoplasm; Cytoskeleton; Phosphoprotein; Polymorphism; Reference proteome		92820	93
MA2A2_HUMAN	TRUE	-0.119265	0.0249999	MAN2A2	MAN2A2 MANA2X	Alpha-mannosidase 2x	-2.42312	-2.38752	0.0258308	0.207886	0.208864	2.35568	20	0.0186794	0.0145355	0.0149722	1150	Golgi membrane [GO:0000139]; integral component of membrane [GO:0016021]; alpha-mannosidase activity [GO:0004559]; carbohydrate binding [GO:0030246]; hydrolase activity, hydrolyzing N-glycosyl compounds [GO:0016799]; mannosyl-oligosaccharide 1,3-1,6-alpha-mannosidase activity [GO:0004572]; zinc ion binding [GO:0008270]; mannose metabolic process [GO:0006013]; N-glycan processing [GO:0006491]; pro…	Golgi membrane [GO:0000139]; integral component of membrane [GO:0016021]; alpha-mannosidase activity [GO:0004559]; carbohydrate binding [GO:0030246]; hydrolase activity, hydrolyzing N-glycosyl compounds [GO:0016799]; mannosyl-oligosaccharide 1,3-1,6-alpha-mannosidase activity [GO:0004572]; zinc ion binding [GO:0008270]; mannose metabolic process [GO:0006013]; N-glycan processing [GO:0006491]; pro…	Golgi membrane [GO:0000139]; integral component of membrane [GO:0016021]; alpha-mannosidase activity [GO:0004559]; carbohydrate binding [GO:0030246]; hydrolase activity, hydrolyzing N-glycosyl compounds [GO:0016799]; mannosyl-oligosaccharide 1,3-1,6-alpha-mannosidase activity [GO:0004572]; zinc ion binding [GO:0008270]; mannose metabolic process [GO:0006013]; N-glycan processing [GO:0006491]; pro…	Alternative splicing; Complete proteome; Disulfide bond; Glycoprotein; Glycosidase; Golgi apparatus; Hydrolase; Membrane; Metal-binding; Polymorphism; Reference proteome; Signal-anchor; Transmembrane; Transmembrane helix; Zinc	Catalyzes the first committed step in the biosynthesis of complex N-glycans. It controls conversion of high mannose to complex N-glycans; the final hydrolytic step in the N-glycan maturation pathway.	130539	131
LYPA2_HUMAN	TRUE	-0.104866	0.0158692	LYPLA2	LYPLA2 APT2	Acyl-protein thioesterase 2	-2.63519	-2.51052	0.0197689	0.174181	0.186749	2.35568	20	0.0186794	0.00950155	0.0104686	231	cytoplasm [GO:0005737]; cytosol [GO:0005829]; extracellular exosome [GO:0070062]; cadherin binding [GO:0045296]; carboxylic ester hydrolase activity [GO:0052689]; palmitoyl-(protein) hydrolase activity [GO:0008474]; axon guidance [GO:0007411]; fatty acid metabolic process [GO:0006631]; protein depalmitoylation [GO:0002084]	cytoplasm [GO:0005737]; cytosol [GO:0005829]; extracellular exosome [GO:0070062]; cadherin binding [GO:0045296]; carboxylic ester hydrolase activity [GO:0052689]; palmitoyl-(protein) hydrolase activity [GO:0008474]; axon guidance [GO:0007411]; fatty acid metabolic process [GO:0006631]; protein depalmitoylation [GO:0002084]	cytoplasm [GO:0005737]; cytosol [GO:0005829]; extracellular exosome [GO:0070062]; cadherin binding [GO:0045296]; carboxylic ester hydrolase activity [GO:0052689]; palmitoyl-(protein) hydrolase activity [GO:0008474]; axon guidance [GO:0007411]; fatty acid metabolic process [GO:0006631]; protein depalmitoylation [GO:0002084]	3D-structure; Complete proteome; Cytoplasm; Fatty acid metabolism; Hydrolase; Lipid metabolism; Phosphoprotein; Reference proteome	May hydrolyze fatty acids from S-acylated cysteine residues in proteins such as trimeric G alpha proteins or HRAS. Has lysophospholipase activity (By similarity). Deacylates GAP43. {ECO:0000250, ECO:0000269|PubMed:21152083}.	24737	25
LRC39_HUMAN	TRUE	-0.0846745	0.00977584	LRRC39	LRRC39 UNQ6500/PRO21368	Leucine-rich repeat-containing protein 39	-2.85554	-2.53617	0.0186847	0.145257	0.182627	2.35568	20	0.0186794	0.00527569	0.00668808	335				Alternative splicing; Coiled coil; Complete proteome; Leucine-rich repeat; Polymorphism; Reference proteome; Repeat		38793	39
LRC20_HUMAN	TRUE	-0.113696	0.0264848	LRRC20	LRRC20 UNQ2429/PRO4989	Leucine-rich repeat-containing protein 20	-2.39575	-2.3489	0.0280631	0.213243	0.217957	2.35568	20	0.0186794	0.0135132	0.0140575	184				Alternative splicing; Complete proteome; Leucine-rich repeat; Phosphoprotein; Reference proteome; Repeat		20509	21
LMOD1_HUMAN	TRUE	-0.146794	0.0282623	LMOD1	LMOD1	Leiomodin-1	-2.3648	-2.3891	0.0257434	0.216883	0.208864	2.35568	20	0.0186794	0.0231195	0.0226516	600	actin filament [GO:0005884]; cytosol [GO:0005829]; membrane [GO:0016020]; myofibril [GO:0030016]; sarcomere [GO:0030017]; actin binding [GO:0003779]; tropomyosin binding [GO:0005523]; actin nucleation [GO:0045010]; muscle contraction [GO:0006936]; pointed-end actin filament capping [GO:0051694]; positive regulation of actin filament polymerization [GO:0030838]	actin filament [GO:0005884]; cytosol [GO:0005829]; membrane [GO:0016020]; myofibril [GO:0030016]; sarcomere [GO:0030017]; actin binding [GO:0003779]; tropomyosin binding [GO:0005523]; actin nucleation [GO:0045010]; muscle contraction [GO:0006936]; pointed-end actin filament capping [GO:0051694]; positive regulation of actin filament polymerization [GO:0030838]	actin filament [GO:0005884]; cytosol [GO:0005829]; membrane [GO:0016020]; myofibril [GO:0030016]; sarcomere [GO:0030017]; actin binding [GO:0003779]; tropomyosin binding [GO:0005523]; actin nucleation [GO:0045010]; muscle contraction [GO:0006936]; pointed-end actin filament capping [GO:0051694]; positive regulation of actin filament polymerization [GO:0030838]	3D-structure; Actin-binding; Alternative splicing; Complete proteome; Cytoplasm; Cytoskeleton; Phosphoprotein; Polymorphism; Reference proteome; Repeat	Mediates nucleation of actin filaments. {ECO:0000269|PubMed:26370058}.	67030	67
LHPP_HUMAN	TRUE	-0.136899	0.0370259	LHPP	LHPP	Phospholysine phosphohistidine inorganic pyrophosphate phosphatase	-2.23447	-2.25483	0.0342623	0.24701	0.233654	2.35568	20	0.0186794	0.0225217	0.0221168	270	cytosol [GO:0005829]; nuclear speck [GO:0016607]; nucleus [GO:0005634]; inorganic diphosphatase activity [GO:0004427]; magnesium ion binding [GO:0000287]; phosphatase activity [GO:0016791]; phosphohistidine phosphatase activity [GO:0008969]; protein homodimerization activity [GO:0042803]; dephosphorylation [GO:0016311]; phosphate-containing compound metabolic process [GO:0006796]; protein dephosp…	cytosol [GO:0005829]; nuclear speck [GO:0016607]; nucleus [GO:0005634]; inorganic diphosphatase activity [GO:0004427]; magnesium ion binding [GO:0000287]; phosphatase activity [GO:0016791]; phosphohistidine phosphatase activity [GO:0008969]; protein homodimerization activity [GO:0042803]; dephosphorylation [GO:0016311]; phosphate-containing compound metabolic process [GO:0006796]; protein dephosp…	cytosol [GO:0005829]; nuclear speck [GO:0016607]; nucleus [GO:0005634]; inorganic diphosphatase activity [GO:0004427]; magnesium ion binding [GO:0000287]; phosphatase activity [GO:0016791]; phosphohistidine phosphatase activity [GO:0008969]; protein homodimerization activity [GO:0042803]; dephosphorylation [GO:0016311]; phosphate-containing compound metabolic process [GO:0006796]; protein dephosp…	3D-structure; Alternative splicing; Complete proteome; Cytoplasm; Hydrolase; Magnesium; Metal-binding; Nucleus; Polymorphism; Reference proteome	Phosphatase that hydrolyzes imidodiphosphate, 3-phosphohistidine and 6-phospholysine. Has broad substrate specificity and can also hydrolyze inorganic diphosphate, but with lower efficiency (By similarity). {ECO:0000250}.	29165	29
LEG1_HUMAN	TRUE	-0.461259	2.21e-05	LGALS1	LGALS1	Galectin-1	-5.49925	-5.66826	1e-05	0.0504794	0.0343396	2.35568	20	0.0186794	0.0422118	0.0397321	135	cell surface [GO:0009986]; cytoplasm [GO:0005737]; cytosol [GO:0005829]; extracellular exosome [GO:0070062]; extracellular matrix [GO:0031012]; extracellular space [GO:0005615]; intracellular [GO:0005622]; nucleus [GO:0005634]; proteinaceous extracellular matrix [GO:0005578]; glycoprotein binding [GO:0001948]; lactose binding [GO:0030395]; laminin binding [GO:0043236]; protein homodimerization ac…	cell surface [GO:0009986]; cytoplasm [GO:0005737]; cytosol [GO:0005829]; extracellular exosome [GO:0070062]; extracellular matrix [GO:0031012]; extracellular space [GO:0005615]; intracellular [GO:0005622]; nucleus [GO:0005634]; proteinaceous extracellular matrix [GO:0005578]; glycoprotein binding [GO:0001948]; lactose binding [GO:0030395]; laminin binding [GO:0043236]; protein homodimerization ac…	cell surface [GO:0009986]; cytoplasm [GO:0005737]; cytosol [GO:0005829]; extracellular exosome [GO:0070062]; extracellular matrix [GO:0031012]; extracellular space [GO:0005615]; intracellular [GO:0005622]; nucleus [GO:0005634]; proteinaceous extracellular matrix [GO:0005578]; glycoprotein binding [GO:0001948]; lactose binding [GO:0030395]; laminin binding [GO:0043236]; protein homodimerization ac…	3D-structure; Acetylation; Apoptosis; Complete proteome; Direct protein sequencing; Extracellular matrix; Lectin; Phosphoprotein; Reference proteome; Secreted	Lectin that binds beta-galactoside and a wide array of complex carbohydrates. Plays a role in regulating apoptosis, cell proliferation and cell differentiation. Inhibits CD45 protein phosphatase activity and therefore the dephosphorylation of Lyn kinase. Strong inducer of T-cell apoptosis. {ECO:0000269|PubMed:14617626, ECO:0000269|PubMed:18796645, ECO:0000269|PubMed:19497882, ECO:0000269|PubMed:2…	14716	15
KS6A5_HUMAN	TRUE	-0.107092	0.0491743	RPS6KA5	RPS6KA5 MSK1	Ribosomal protein S6 kinase alpha-5	-2.09431	-2.07358	0.0498359	0.277193	0.275917	2.35568	20	0.0186794	0.0156886	0.0160038	802	cytoplasm [GO:0005737]; nucleoplasm [GO:0005654]; nucleus [GO:0005634]; ATP binding [GO:0005524]; magnesium ion binding [GO:0000287]; protein kinase activity [GO:0004672]; protein serine/threonine kinase activity [GO:0004674]; axon guidance [GO:0007411]; epidermal growth factor receptor signaling pathway [GO:0007173]; histone H2A-S1 phosphorylation [GO:0043990]; histone H3-S10 phosphorylation [GO…	cytoplasm [GO:0005737]; nucleoplasm [GO:0005654]; nucleus [GO:0005634]; ATP binding [GO:0005524]; magnesium ion binding [GO:0000287]; protein kinase activity [GO:0004672]; protein serine/threonine kinase activity [GO:0004674]; axon guidance [GO:0007411]; epidermal growth factor receptor signaling pathway [GO:0007173]; histone H2A-S1 phosphorylation [GO:0043990]; histone H3-S10 phosphorylation [GO…	cytoplasm [GO:0005737]; nucleoplasm [GO:0005654]; nucleus [GO:0005634]; ATP binding [GO:0005524]; magnesium ion binding [GO:0000287]; protein kinase activity [GO:0004672]; protein serine/threonine kinase activity [GO:0004674]; axon guidance [GO:0007411]; epidermal growth factor receptor signaling pathway [GO:0007173]; histone H2A-S1 phosphorylation [GO:0043990]; histone H3-S10 phosphorylation [GO…	3D-structure; ATP-binding; Alternative splicing; Complete proteome; Cytoplasm; Inflammatory response; Kinase; Magnesium; Metal-binding; Nucleotide-binding; Nucleus; Phosphoprotein; Polymorphism; Reference proteome; Repeat; Serine/threonine-protein kinase; Stress response; Transferase; Ubl conjugation	Serine/threonine-protein kinase that is required for the mitogen or stress-induced phosphorylation of the transcription factors CREB1 and ATF1 and for the regulation of the transcription factors RELA, STAT3 and ETV1/ER81, and that contributes to gene activation by histone phosphorylation and functions in the regulation of inflammatory genes. Phosphorylates CREB1 and ATF1 in response to mitogenic …	89865	90
KRI1_HUMAN	TRUE	-0.158844	0.0105416	KRI1	NA	NA	-2.82156	-2.8242	0.00978233	0.150268	0.146548	2.35568	20	0.0186794	0.0190156	0.0189802	NA	NA	NA	NA	NA	NA	NA	NA
KANK1_HUMAN	TRUE	-0.167161	0.0347549	KANK1	NA	NA	-2.71757	-2.28537	0.0502912	0.239049	0.277346	2.35568	6	0.0186794	0.00756731	0.0107001	NA	NA	NA	NA	NA	NA	NA	NA
IRS1_HUMAN	TRUE	-0.159744	0.0130012	IRS1	IRS1	Insulin receptor substrate 1	-2.72648	-2.73995	0.0118496	0.162628	0.155949	2.35568	20	0.0186794	0.0205966	0.0203946	1242	caveola [GO:0005901]; cytoplasm [GO:0005737]; cytosol [GO:0005829]; insulin receptor complex [GO:0005899]; intracellular membrane-bounded organelle [GO:0043231]; nucleus [GO:0005634]; plasma membrane [GO:0005886]; 1-phosphatidylinositol-3-kinase activity [GO:0016303]; insulin receptor binding [GO:0005158]; insulin-like growth factor receptor binding [GO:0005159]; phosphatidylinositol 3-kinase bin…	caveola [GO:0005901]; cytoplasm [GO:0005737]; cytosol [GO:0005829]; insulin receptor complex [GO:0005899]; intracellular membrane-bounded organelle [GO:0043231]; nucleus [GO:0005634]; plasma membrane [GO:0005886]; 1-phosphatidylinositol-3-kinase activity [GO:0016303]; insulin receptor binding [GO:0005158]; insulin-like growth factor receptor binding [GO:0005159]; phosphatidylinositol 3-kinase bin…	caveola [GO:0005901]; cytoplasm [GO:0005737]; cytosol [GO:0005829]; insulin receptor complex [GO:0005899]; intracellular membrane-bounded organelle [GO:0043231]; nucleus [GO:0005634]; plasma membrane [GO:0005886]; 1-phosphatidylinositol-3-kinase activity [GO:0016303]; insulin receptor binding [GO:0005158]; insulin-like growth factor receptor binding [GO:0005159]; phosphatidylinositol 3-kinase bin…	3D-structure; Complete proteome; Diabetes mellitus; Disease mutation; Phosphoprotein; Polymorphism; Reference proteome; Repeat; Transducer; Ubl conjugation	May mediate the control of various cellular processes by insulin. When phosphorylated by the insulin receptor binds specifically to various cellular proteins containing SH2 domains such as phosphatidylinositol 3-kinase p85 subunit or GRB2. Activates phosphatidylinositol 3-kinase when bound to the regulatory p85 subunit (By similarity). {ECO:0000250, ECO:0000269|PubMed:16878150}.	131591	132
IRF3_HUMAN	TRUE	-0.216536	0.0373902	IRF3	NA	NA	-2.66268	-2.52025	0.0346225	0.24818	0.234172	2.35568	6	0.0186794	0.0132268	0.014764	NA	NA	NA	NA	NA	NA	NA	NA
IPO13_HUMAN	TRUE	-0.129132	0.00944491	IPO13	IPO13 KIAA0724 RANBP13	Importin-13	-2.87102	-2.79282	0.0105087	0.143709	0.149072	2.35568	20	0.0186794	0.0121379	0.0128272	963	cytoplasm [GO:0005737]; nuclear membrane [GO:0031965]; nuclear localization sequence binding [GO:0008139]; protein transporter activity [GO:0008565]; Ran GTPase binding [GO:0008536]; protein import into nucleus [GO:0006606]	cytoplasm [GO:0005737]; nuclear membrane [GO:0031965]; nuclear localization sequence binding [GO:0008139]; protein transporter activity [GO:0008565]; Ran GTPase binding [GO:0008536]; protein import into nucleus [GO:0006606]	cytoplasm [GO:0005737]; nuclear membrane [GO:0031965]; nuclear localization sequence binding [GO:0008139]; protein transporter activity [GO:0008565]; Ran GTPase binding [GO:0008536]; protein import into nucleus [GO:0006606]	3D-structure; Complete proteome; Cytoplasm; Nucleus; Protein transport; Reference proteome; Repeat; Transport	Functions in nuclear protein import as nuclear transport receptor. Serves as receptor for nuclear localization signals (NLS) in cargo substrates. Is thought to mediate docking of the importin/substrate complex to the nuclear pore complex (NPC) through binding to nucleoporin and the complex is subsequently translocated through the pore by an energy requiring, Ran-dependent mechanism. At the nucleo…	108195	108
IPO11_HUMAN	TRUE	-0.243378	0.00458943	IPO11	IPO11 RANBP11	Importin-11	-3.41706	-3.43808	0.00355411	0.127862	0.113342	2.35568	13	0.0186794	0.0202916	0.0200443	975	cytoplasm [GO:0005737]; fibrillar center [GO:0001650]; nucleus [GO:0005634]; protein transporter activity [GO:0008565]; Ran GTPase binding [GO:0008536]; ribosomal protein import into nucleus [GO:0006610]	cytoplasm [GO:0005737]; fibrillar center [GO:0001650]; nucleus [GO:0005634]; protein transporter activity [GO:0008565]; Ran GTPase binding [GO:0008536]; ribosomal protein import into nucleus [GO:0006610]	cytoplasm [GO:0005737]; fibrillar center [GO:0001650]; nucleus [GO:0005634]; protein transporter activity [GO:0008565]; Ran GTPase binding [GO:0008536]; ribosomal protein import into nucleus [GO:0006610]	Acetylation; Alternative splicing; Complete proteome; Cytoplasm; Nucleus; Phosphoprotein; Polymorphism; Protein transport; Reference proteome; Repeat; Transport	Functions in nuclear protein import as nuclear transport receptor. Serves as receptor for nuclear localization signals (NLS) in cargo substrates. Is thought to mediate docking of the importin/substrate complex to the nuclear pore complex (NPC) through binding to nucleoporin and the complex is subsequently translocated through the pore by an energy requiring, Ran-dependent mechanism. At the nucleo…	112535	113
INT8_HUMAN	TRUE	-0.349073	0.00185393	INTS8	NA	NA	-5.28633	-4.59778	0.00157171	0.112467	0.108611	2.35568	6	0.0186794	0.00872075	0.0115283	NA	NA	NA	NA	NA	NA	NA	NA
IMPA2_HUMAN	TRUE	-0.168207	0.0408329	IMPA2	IMPA2 IMP.18P	Inositol monophosphatase 2	-2.18653	-2.24326	0.0351056	0.257021	0.236111	2.35568	20	0.0186794	0.0355081	0.0337348	288	cytoplasm [GO:0005737]; cytosol [GO:0005829]; inositol monophosphate 1-phosphatase activity [GO:0008934]; inositol monophosphate 3-phosphatase activity [GO:0052832]; inositol monophosphate 4-phosphatase activity [GO:0052833]; metal ion binding [GO:0046872]; protein homodimerization activity [GO:0042803]; inositol biosynthetic process [GO:0006021]; inositol metabolic process [GO:0006020]; inositol…	cytoplasm [GO:0005737]; cytosol [GO:0005829]; inositol monophosphate 1-phosphatase activity [GO:0008934]; inositol monophosphate 3-phosphatase activity [GO:0052832]; inositol monophosphate 4-phosphatase activity [GO:0052833]; metal ion binding [GO:0046872]; protein homodimerization activity [GO:0042803]; inositol biosynthetic process [GO:0006021]; inositol metabolic process [GO:0006020]; inositol…	cytoplasm [GO:0005737]; cytosol [GO:0005829]; inositol monophosphate 1-phosphatase activity [GO:0008934]; inositol monophosphate 3-phosphatase activity [GO:0052832]; inositol monophosphate 4-phosphatase activity [GO:0052833]; metal ion binding [GO:0046872]; protein homodimerization activity [GO:0042803]; inositol biosynthetic process [GO:0006021]; inositol metabolic process [GO:0006020]; inositol…	3D-structure; Alternative splicing; Complete proteome; Hydrolase; Magnesium; Metal-binding; Polymorphism; Reference proteome	Can use myo-inositol monophosphates, scylloinositol 1,4-diphosphate, glucose-1-phosphate, beta-glycerophosphate, and 2'-AMP as substrates. Has been implicated as the pharmacological target for lithium Li(+) action in brain. {ECO:0000269|PubMed:17068342}.	31321	31
I23O1_HUMAN	TRUE	-0.150624	0.0126333	IDO1	NA	NA	-2.73955	-2.73525	0.0119764	0.160482	0.155949	2.35568	20	0.0186794	0.0181376	0.0181947	NA	NA	NA	NA	NA	NA	NA	NA
HYI_HUMAN	TRUE	-0.152252	0.03299	HYI	HYI HT036 SB156	Putative hydroxypyruvate isomerase	-2.2905	-2.327	0.0294064	0.234145	0.219952	2.35568	20	0.0186794	0.0265105	0.0256853	277	hydroxypyruvate isomerase activity [GO:0008903]	hydroxypyruvate isomerase activity [GO:0008903]	hydroxypyruvate isomerase activity [GO:0008903]	Alternative splicing; Complete proteome; Isomerase; Polymorphism; Reference proteome	Catalyzes the reversible isomerization between hydroxypyruvate and 2-hydroxy-3-oxopropanoate (also termed tartronate semialdehyde). {ECO:0000250}.	30406	30
HSPB8_HUMAN	TRUE	-0.0879396	0.0328454	HSPB8	HSPB8 CRYAC E2IG1 HSP22 PP1629	Heat shock protein beta-8	-2.29263	-2.16866	0.0410119	0.23409	0.255801	2.35568	20	0.0186794	0.00882783	0.00986591	196	cytoplasm [GO:0005737]; cytosol [GO:0005829]; intracellular [GO:0005622]; nucleoplasm [GO:0005654]; nucleus [GO:0005634]; identical protein binding [GO:0042802]; regulation of cellular response to heat [GO:1900034]	cytoplasm [GO:0005737]; cytosol [GO:0005829]; intracellular [GO:0005622]; nucleoplasm [GO:0005654]; nucleus [GO:0005634]; identical protein binding [GO:0042802]; regulation of cellular response to heat [GO:1900034]	cytoplasm [GO:0005737]; cytosol [GO:0005829]; intracellular [GO:0005622]; nucleoplasm [GO:0005654]; nucleus [GO:0005634]; identical protein binding [GO:0042802]; regulation of cellular response to heat [GO:1900034]	Chaperone; Charcot-Marie-Tooth disease; Complete proteome; Cytoplasm; Disease mutation; Methylation; Neurodegeneration; Neuropathy; Nucleus; Phosphoprotein; Polymorphism; Reference proteome; Stress response	Displays temperature-dependent chaperone activity.	21604	22
HS71L_HUMAN	TRUE	-0.2083	0.00425735	HSPA1L	HSPA1L	Heat shock 70 kDa protein 1-like	-3.2239	-3.26797	0.00346826	0.124774	0.113342	2.35568	20	0.0186794	0.0250475	0.0243765	641	blood microparticle [GO:0072562]; cell body [GO:0044297]; cytosol [GO:0005829]; mitochondrial matrix [GO:0005759]; nucleoplasm [GO:0005654]; zona pellucida receptor complex [GO:0002199]; ATP binding [GO:0005524]; heat shock protein binding [GO:0031072]; ubiquitin protein ligase binding [GO:0031625]; unfolded protein binding [GO:0051082]; binding of sperm to zona pellucida [GO:0007339]; positive r…	blood microparticle [GO:0072562]; cell body [GO:0044297]; cytosol [GO:0005829]; mitochondrial matrix [GO:0005759]; nucleoplasm [GO:0005654]; zona pellucida receptor complex [GO:0002199]; ATP binding [GO:0005524]; heat shock protein binding [GO:0031072]; ubiquitin protein ligase binding [GO:0031625]; unfolded protein binding [GO:0051082]; binding of sperm to zona pellucida [GO:0007339]; positive r…	blood microparticle [GO:0072562]; cell body [GO:0044297]; cytosol [GO:0005829]; mitochondrial matrix [GO:0005759]; nucleoplasm [GO:0005654]; zona pellucida receptor complex [GO:0002199]; ATP binding [GO:0005524]; heat shock protein binding [GO:0031072]; ubiquitin protein ligase binding [GO:0031625]; unfolded protein binding [GO:0051082]; binding of sperm to zona pellucida [GO:0007339]; positive r…	3D-structure; ATP-binding; Complete proteome; Nucleotide-binding; Polymorphism; Reference proteome	Molecular chaperone implicated in a wide variety of cellular processes, including protection of the proteome from stress, folding and transport of newly synthesized polypeptides, activation of proteolysis of misfolded proteins and the formation and dissociation of protein complexes. Plays a pivotal role in the protein quality control system, ensuring the correct folding of proteins, the re-foldin…	70375	70
HS71A_HUMAN	TRUE	-0.091007	0.0427598	HSPA1A	HSPA1A HSP72 HSPA1 HSX70	Heat shock 70 kDa protein 1A	-2.1638	-2.08204	0.0489867	0.262085	0.274664	2.35568	20	0.0186794	0.0106137	0.0114636	641	aggresome [GO:0016235]; blood microparticle [GO:0072562]; centriole [GO:0005814]; centrosome [GO:0005813]; cytoplasm [GO:0005737]; cytosol [GO:0005829]; endoplasmic reticulum [GO:0005783]; extracellular exosome [GO:0070062]; extracellular region [GO:0005576]; ficolin-1-rich granule lumen [GO:1904813]; focal adhesion [GO:0005925]; inclusion body [GO:0016234]; intracellular ribonucleoprotein comple…	ATPase activity [GO:0016887]; ATPase activity, coupled [GO:0042623]; ATP binding [GO:0005524]; C3HC4-type RING finger domain binding [GO:0055131]; cadherin binding [GO:0045296]; denatured protein binding [GO:0031249]; disordered domain specific binding [GO:0097718]; enzyme binding [GO:0019899]; G-protein coupled receptor binding [GO:0001664]; heat shock protein binding [GO:0031072]; histone deace…	ATP metabolic process [GO:0046034]; cellular heat acclimation [GO:0070370]; cellular response to heat [GO:0034605]; cellular response to oxidative stress [GO:0034599]; chaperone-mediated protein complex assembly [GO:0051131]; mRNA catabolic process [GO:0006402]; negative regulation of apoptotic process [GO:0043066]; negative regulation of cell death [GO:0060548]; negative regulation of cell growt…	3D-structure; ATP-binding; Acetylation; Alternative splicing; Chaperone; Complete proteome; Cytoplasm; Cytoskeleton; Direct protein sequencing; Host cell receptor for virus entry; Methylation; Nucleotide-binding; Nucleus; Phosphoprotein; Polymorphism; Receptor; Reference proteome; Stress response	Molecular chaperone implicated in a wide variety of cellular processes, including protection of the proteome from stress, folding and transport of newly synthesized polypeptides, activation of proteolysis of misfolded proteins and the formation and dissociation of protein complexes. Plays a pivotal role in the protein quality control system, ensuring the correct folding of proteins, the re-foldin…	70052	70
HP1B3_HUMAN	TRUE	-0.106657	0.000716202	HP1BP3	HP1BP3	Heterochromatin protein 1-binding protein 3	-3.99236	-3.43065	0.00235015	0.110441	0.111706	2.35568	20	0.0186794	0.00428221	0.00579929	553	chromosome [GO:0005694]; nuclear speck [GO:0016607]; nucleosome [GO:0000786]; nucleus [GO:0005634]; DNA binding [GO:0003677]; nucleosome binding [GO:0031491]; cellular response to hypoxia [GO:0071456]; heterochromatin organization [GO:0070828]; nucleosome assembly [GO:0006334]; regulation of cell proliferation [GO:0042127]; regulation of nucleus size [GO:0097298]; regulation of transcription, DNA…	chromosome [GO:0005694]; nuclear speck [GO:0016607]; nucleosome [GO:0000786]; nucleus [GO:0005634]; DNA binding [GO:0003677]; nucleosome binding [GO:0031491]; cellular response to hypoxia [GO:0071456]; heterochromatin organization [GO:0070828]; nucleosome assembly [GO:0006334]; regulation of cell proliferation [GO:0042127]; regulation of nucleus size [GO:0097298]; regulation of transcription, DNA…	chromosome [GO:0005694]; nuclear speck [GO:0016607]; nucleosome [GO:0000786]; nucleus [GO:0005634]; DNA binding [GO:0003677]; nucleosome binding [GO:0031491]; cellular response to hypoxia [GO:0071456]; heterochromatin organization [GO:0070828]; nucleosome assembly [GO:0006334]; regulation of cell proliferation [GO:0042127]; regulation of nucleus size [GO:0097298]; regulation of transcription, DNA…	3D-structure; Acetylation; Alternative splicing; Chromosome; Complete proteome; DNA-binding; Direct protein sequencing; Nucleus; Phosphoprotein; Reference proteome; Repeat	Component of heterochromatin that maintains heterochromatin integrity during G1/S progression and regulates the duration of G1 phase to critically influence cell proliferative capacity (PubMed:24830416). Mediates chromatin condensation during hypoxia, leading to increased tumor cell viability, radio-resistance, chemo-resistance and self-renewal(PubMed:25100860). {ECO:0000269|PubMed:24830416, ECO:…	61207	61
HNRLL_HUMAN	TRUE	-0.138302	0.00688628	HNRNPLL	HNRNPLL HNRPLL SRRF BLOCK24	Heterogeneous nuclear ribonucleoprotein L-like	-3.01206	-2.93915	0.00750872	0.138863	0.132753	2.35568	20	0.0186794	0.0126498	0.0132851	542	intracellular ribonucleoprotein complex [GO:0030529]; membrane [GO:0016020]; nucleus [GO:0005634]; mRNA binding [GO:0003729]; RNA binding [GO:0003723]; mRNA processing [GO:0006397]; positive regulation of RNA splicing [GO:0033120]	intracellular ribonucleoprotein complex [GO:0030529]; membrane [GO:0016020]; nucleus [GO:0005634]; mRNA binding [GO:0003729]; RNA binding [GO:0003723]; mRNA processing [GO:0006397]; positive regulation of RNA splicing [GO:0033120]	intracellular ribonucleoprotein complex [GO:0030529]; membrane [GO:0016020]; nucleus [GO:0005634]; mRNA binding [GO:0003729]; RNA binding [GO:0003723]; mRNA processing [GO:0006397]; positive regulation of RNA splicing [GO:0033120]	Alternative splicing; Complete proteome; Phosphoprotein; RNA-binding; Reference proteome; Repeat; Ribonucleoprotein	RNA-binding protein that functions as regulator of alternative splicing for multiple target mRNAs, including PTPRC/CD45 and STAT5A. Required for alternative splicing of PTPRC. {ECO:0000269|PubMed:18669861}.	60083	60
HMGA1_HUMAN	TRUE	-0.193992	0.00297983	HMGA1	HMGA1 HMGIY	High mobility group protein HMG-I/HMG-Y	-3.37936	-3.38924	0.00259589	0.122032	0.112849	2.35568	20	0.0186794	0.0197719	0.0196568	107	cytosol [GO:0005829]; focal adhesion [GO:0005925]; nucleoplasm [GO:0005654]; nucleus [GO:0005634]; RNA polymerase II transcription factor complex [GO:0090575]; senescence-associated heterochromatin focus [GO:0035985]; transcription factor complex [GO:0005667]; 5'-deoxyribose-5-phosphate lyase activity [GO:0051575]; AT DNA binding [GO:0003680]; chromatin binding [GO:0003682]; DNA binding [GO:00036…	cytosol [GO:0005829]; focal adhesion [GO:0005925]; nucleoplasm [GO:0005654]; nucleus [GO:0005634]; RNA polymerase II transcription factor complex [GO:0090575]; senescence-associated heterochromatin focus [GO:0035985]; transcription factor complex [GO:0005667]; 5'-deoxyribose-5-phosphate lyase activity [GO:0051575]; AT DNA binding [GO:0003680]; chromatin binding [GO:0003682]; DNA binding [GO:00036…	cytosol [GO:0005829]; focal adhesion [GO:0005925]; nucleoplasm [GO:0005654]; nucleus [GO:0005634]; RNA polymerase II transcription factor complex [GO:0090575]; senescence-associated heterochromatin focus [GO:0035985]; transcription factor complex [GO:0005667]; 5'-deoxyribose-5-phosphate lyase activity [GO:0051575]; AT DNA binding [GO:0003680]; chromatin binding [GO:0003682]; DNA binding [GO:00036…	3D-structure; ADP-ribosylation; Acetylation; Alternative splicing; Chromosomal rearrangement; Chromosome; Complete proteome; DNA-binding; Direct protein sequencing; Host-virus interaction; Methylation; Nucleus; Phosphoprotein; Reference proteome; Repeat; Transcription; Transcription regulation	HMG-I/Y bind preferentially to the minor groove of A+T rich regions in double-stranded DNA. It is suggested that these proteins could function in nucleosome phasing and in the 3'-end processing of mRNA transcripts. They are also involved in the transcription regulation of genes containing, or in close proximity to A+T-rich regions.	11676	12
HMCN2_HUMAN	TRUE	-0.09805	0.00804236	HMCN2	HMCN2	Hemicentin-2	-2.94299	-2.69764	0.0130377	0.14131	0.15898	2.35568	20	0.0186794	0.00665991	0.00792644	5059	basement membrane [GO:0005604]; cell cortex [GO:0005938]; cell junction [GO:0030054]; cleavage furrow [GO:0032154]; calcium ion binding [GO:0005509]; positive regulation of cell migration [GO:0030335]; response to stimulus [GO:0050896]; smooth muscle contraction [GO:0006939]	basement membrane [GO:0005604]; cell cortex [GO:0005938]; cell junction [GO:0030054]; cleavage furrow [GO:0032154]; calcium ion binding [GO:0005509]; positive regulation of cell migration [GO:0030335]; response to stimulus [GO:0050896]; smooth muscle contraction [GO:0006939]	basement membrane [GO:0005604]; cell cortex [GO:0005938]; cell junction [GO:0030054]; cleavage furrow [GO:0032154]; calcium ion binding [GO:0005509]; positive regulation of cell migration [GO:0030335]; response to stimulus [GO:0050896]; smooth muscle contraction [GO:0006939]	Alternative splicing; Calcium; Complete proteome; Disulfide bond; EGF-like domain; Extracellular matrix; Glycoprotein; Immunoglobulin domain; Methylation; Reference proteome; Repeat; Secreted; Sensory transduction; Signal		541978	542
HMBX1_HUMAN	TRUE	-0.573092	0.0471874	HMBOX1	NA	NA	-2.48961	-2.84129	0.0208353	0.27254	0.191611	2.35568	6	0.0186794	0.105978	0.0813666	NA	NA	NA	NA	NA	NA	NA	NA
HACD3_HUMAN	TRUE	-0.094136	0.0380001	HACD3	HACD3 BIND1 PTPLAD1	Very-long-chain	-2.22179	-2.14053	0.0434633	0.248876	0.26195	2.35568	20	0.0186794	0.010771	0.0116044	362	cytosol [GO:0005829]; endoplasmic reticulum [GO:0005783]; endoplasmic reticulum membrane [GO:0005789]; focal adhesion [GO:0005925]; integral component of membrane [GO:0016021]; mitochondrion [GO:0005739]; nuclear membrane [GO:0031965]; 3-hydroxy-arachidoyl-CoA dehydratase activity [GO:0102343]; 3-hydroxy-behenoyl-CoA dehydratase activity [GO:0102344]; 3-hydroxy-lignoceroyl-CoA dehydratase activit…	cytosol [GO:0005829]; endoplasmic reticulum [GO:0005783]; endoplasmic reticulum membrane [GO:0005789]; focal adhesion [GO:0005925]; integral component of membrane [GO:0016021]; mitochondrion [GO:0005739]; nuclear membrane [GO:0031965]; 3-hydroxy-arachidoyl-CoA dehydratase activity [GO:0102343]; 3-hydroxy-behenoyl-CoA dehydratase activity [GO:0102344]; 3-hydroxy-lignoceroyl-CoA dehydratase activit…	cytosol [GO:0005829]; endoplasmic reticulum [GO:0005783]; endoplasmic reticulum membrane [GO:0005789]; focal adhesion [GO:0005925]; integral component of membrane [GO:0016021]; mitochondrion [GO:0005739]; nuclear membrane [GO:0031965]; 3-hydroxy-arachidoyl-CoA dehydratase activity [GO:0102343]; 3-hydroxy-behenoyl-CoA dehydratase activity [GO:0102344]; 3-hydroxy-lignoceroyl-CoA dehydratase activit…	Acetylation; Alternative splicing; Coiled coil; Complete proteome; Endoplasmic reticulum; Fatty acid biosynthesis; Fatty acid metabolism; Lipid biosynthesis; Lipid metabolism; Lyase; Membrane; Phosphoprotein; Polymorphism; Reference proteome; Transmembrane; Transmembrane helix	Catalyzes the third of the four reactions of the long-chain fatty acids elongation cycle. This endoplasmic reticulum-bound enzymatic process, allows the addition of two carbons to the chain of long- and very long-chain fatty acids/VLCFAs per cycle. This enzyme catalyzes the dehydration of the 3-hydroxyacyl-CoA intermediate into trans-2,3-enoyl-CoA, within each cycle of fatty acid elongation. Ther…	43160	43
H33_HUMAN	TRUE	-0.192179	0.00406481	H3F3A; H3F3B	H3F3A H3.3A H3F3 PP781; H3F3B H3.3B	Histone H3.3	-3.24414	-3.2636	0.00350453	0.123391	0.113342	2.35568	20	0.0186794	0.0210555	0.0208052	136	Barr body [GO:0001740]; extracellular exosome [GO:0070062]; extracellular region [GO:0005576]; nuclear chromosome [GO:0000228]; nuclear chromosome, telomeric region [GO:0000784]; nuclear nucleosome [GO:0000788]; nucleoplasm [GO:0005654]; nucleosome [GO:0000786]; nucleus [GO:0005634]; protein complex [GO:0043234]; histone binding [GO:0042393]; nucleosomal DNA binding [GO:0031492]; protein heterodi…	Barr body [GO:0001740]; extracellular exosome [GO:0070062]; extracellular region [GO:0005576]; nuclear chromosome [GO:0000228]; nuclear chromosome, telomeric region [GO:0000784]; nuclear nucleosome [GO:0000788]; nucleoplasm [GO:0005654]; nucleosome [GO:0000786]; nucleus [GO:0005634]; protein complex [GO:0043234]; histone binding [GO:0042393]; nucleosomal DNA binding [GO:0031492]; protein heterodi…	Barr body [GO:0001740]; extracellular exosome [GO:0070062]; extracellular region [GO:0005576]; nuclear chromosome [GO:0000228]; nuclear chromosome, telomeric region [GO:0000784]; nuclear nucleosome [GO:0000788]; nucleoplasm [GO:0005654]; nucleosome [GO:0000786]; nucleus [GO:0005634]; protein complex [GO:0043234]; histone binding [GO:0042393]; nucleosomal DNA binding [GO:0031492]; protein heterodi…	3D-structure; ADP-ribosylation; Acetylation; Chromosome; Citrullination; Complete proteome; DNA-binding; Direct protein sequencing; Methylation; Nucleosome core; Nucleus; Phosphoprotein; Reference proteome; Ubl conjugation	Variant histone H3 which replaces conventional H3 in a wide range of nucleosomes in active genes. Constitutes the predominant form of histone H3 in non-dividing cells and is incorporated into chromatin independently of DNA synthesis. Deposited at sites of nucleosomal displacement throughout transcribed genes, suggesting that it represents an epigenetic imprint of transcriptionally active chromati…	15328	15
H10_HUMAN	TRUE	-0.121209	0.00548333	H1F0	H1F0 H1FV	Histone H1.0	-3.1128	-2.95323	0.00726789	0.131969	0.132722	2.35568	20	0.0186794	0.0090974	0.0101071	194	actin cytoskeleton [GO:0015629]; Golgi apparatus [GO:0005794]; nuclear body [GO:0016604]; nuclear chromatin [GO:0000790]; nuclear euchromatin [GO:0005719]; nucleoplasm [GO:0005654]; nucleosome [GO:0000786]; nucleus [GO:0005634]; AT DNA binding [GO:0003680]; chromatin DNA binding [GO:0031490]; RNA binding [GO:0003723]; apoptotic DNA fragmentation [GO:0006309]; nucleosome assembly [GO:0006334]	actin cytoskeleton [GO:0015629]; Golgi apparatus [GO:0005794]; nuclear body [GO:0016604]; nuclear chromatin [GO:0000790]; nuclear euchromatin [GO:0005719]; nucleoplasm [GO:0005654]; nucleosome [GO:0000786]; nucleus [GO:0005634]; AT DNA binding [GO:0003680]; chromatin DNA binding [GO:0031490]; RNA binding [GO:0003723]; apoptotic DNA fragmentation [GO:0006309]; nucleosome assembly [GO:0006334]	actin cytoskeleton [GO:0015629]; Golgi apparatus [GO:0005794]; nuclear body [GO:0016604]; nuclear chromatin [GO:0000790]; nuclear euchromatin [GO:0005719]; nucleoplasm [GO:0005654]; nucleosome [GO:0000786]; nucleus [GO:0005634]; AT DNA binding [GO:0003680]; chromatin DNA binding [GO:0031490]; RNA binding [GO:0003723]; apoptotic DNA fragmentation [GO:0006309]; nucleosome assembly [GO:0006334]	ADP-ribosylation; Acetylation; Alternative splicing; Chromosome; Citrullination; Complete proteome; DNA-binding; Direct protein sequencing; Nucleus; Phosphoprotein; RNA editing; Reference proteome	Histones H1 are necessary for the condensation of nucleosome chains into higher-order structures. The H1F0 histones are found in cells that are in terminal stages of differentiation or that have low rates of cell division.	20863	21
GRIP2_HUMAN	TRUE	-0.170316	0.0462258	GRIP2	NA	NA	-2.12516	-2.18532	0.03962	0.270572	0.251026	2.35568	20	0.0186794	0.038537	0.0364445	NA	NA	NA	NA	NA	NA	NA	NA
GMPPB_HUMAN	TRUE	-0.174039	0.0252337	GMPPB	GMPPB	Mannose-1-phosphate guanyltransferase beta	-2.41871	-2.47118	0.0215466	0.209005	0.193939	2.35568	20	0.0186794	0.0310654	0.0297603	360	cytoplasm [GO:0005737]; extracellular exosome [GO:0070062]; mitochondrion [GO:0005739]; GTP binding [GO:0005525]; mannose-1-phosphate guanylyltransferase activity [GO:0004475]; GDP-mannose biosynthetic process [GO:0009298]	cytoplasm [GO:0005737]; extracellular exosome [GO:0070062]; mitochondrion [GO:0005739]; GTP binding [GO:0005525]; mannose-1-phosphate guanylyltransferase activity [GO:0004475]; GDP-mannose biosynthetic process [GO:0009298]	cytoplasm [GO:0005737]; extracellular exosome [GO:0070062]; mitochondrion [GO:0005739]; GTP binding [GO:0005525]; mannose-1-phosphate guanylyltransferase activity [GO:0004475]; GDP-mannose biosynthetic process [GO:0009298]	Alternative splicing; Complete proteome; Congenital muscular dystrophy; Cytoplasm; Disease mutation; Dystroglycanopathy; GTP-binding; Limb-girdle muscular dystrophy; Nucleotide-binding; Nucleotidyltransferase; Polymorphism; Reference proteome; Transferase		39834	40
GGPPS_HUMAN	TRUE	-0.116714	0.00823399	GGPS1	GGPS1	Geranylgeranyl pyrophosphate synthase	-2.93248	-2.79383	0.0104846	0.14131	0.149072	2.35568	20	0.0186794	0.00950452	0.0104713	300	cytosol [GO:0005829]; dimethylallyltranstransferase activity [GO:0004161]; farnesyltranstransferase activity [GO:0004311]; geranyltranstransferase activity [GO:0004337]; identical protein binding [GO:0042802]; metal ion binding [GO:0046872]; cholesterol biosynthetic process [GO:0006695]; farnesyl diphosphate biosynthetic process [GO:0045337]; geranyl diphosphate biosynthetic process [GO:0033384];…	cytosol [GO:0005829]; dimethylallyltranstransferase activity [GO:0004161]; farnesyltranstransferase activity [GO:0004311]; geranyltranstransferase activity [GO:0004337]; identical protein binding [GO:0042802]; metal ion binding [GO:0046872]; cholesterol biosynthetic process [GO:0006695]; farnesyl diphosphate biosynthetic process [GO:0045337]; geranyl diphosphate biosynthetic process [GO:0033384];…	cytosol [GO:0005829]; dimethylallyltranstransferase activity [GO:0004161]; farnesyltranstransferase activity [GO:0004311]; geranyltranstransferase activity [GO:0004337]; identical protein binding [GO:0042802]; metal ion binding [GO:0046872]; cholesterol biosynthetic process [GO:0006695]; farnesyl diphosphate biosynthetic process [GO:0045337]; geranyl diphosphate biosynthetic process [GO:0033384];…	3D-structure; Acetylation; Alternative splicing; Complete proteome; Cytoplasm; Isoprene biosynthesis; Magnesium; Metal-binding; Reference proteome; Transferase	Catalyzes the trans-addition of the three molecules of IPP onto DMAPP to form geranylgeranyl pyrophosphate, an important precursor of carotenoids and geranylated proteins.	34871	35
GDE1_HUMAN	TRUE	-0.14569	0.0475302	GDE1	GDE1 MIR16	Glycerophosphodiester phosphodiesterase 1	-2.1113	-2.15089	0.0425451	0.272684	0.260631	2.35568	20	0.0186794	0.0285701	0.0275279	331	cytoplasmic vesicle membrane [GO:0030659]; integral component of membrane [GO:0016021]; plasma membrane [GO:0005886]; glycerophosphodiester phosphodiesterase activity [GO:0008889]; glycerophosphoinositol glycerophosphodiesterase activity [GO:0047395]; metal ion binding [GO:0046872]; glycerophospholipid catabolic process [GO:0046475]; lipid metabolic process [GO:0006629]	cytoplasmic vesicle membrane [GO:0030659]; integral component of membrane [GO:0016021]; plasma membrane [GO:0005886]; glycerophosphodiester phosphodiesterase activity [GO:0008889]; glycerophosphoinositol glycerophosphodiesterase activity [GO:0047395]; metal ion binding [GO:0046872]; glycerophospholipid catabolic process [GO:0046475]; lipid metabolic process [GO:0006629]	cytoplasmic vesicle membrane [GO:0030659]; integral component of membrane [GO:0016021]; plasma membrane [GO:0005886]; glycerophosphodiester phosphodiesterase activity [GO:0008889]; glycerophosphoinositol glycerophosphodiesterase activity [GO:0047395]; metal ion binding [GO:0046872]; glycerophospholipid catabolic process [GO:0046475]; lipid metabolic process [GO:0006629]	Cell membrane; Complete proteome; Cytoplasmic vesicle; Glycoprotein; Hydrolase; Magnesium; Membrane; Metal-binding; Polymorphism; Reference proteome; Transmembrane; Transmembrane helix	Has glycerophosphoinositol phosphodiesterase activity. Has little or no activity towards glycerophosphocholine. GDE1 activity can be modulated by G-protein signaling pathways (By similarity). {ECO:0000250}.	37718	38
GDE_HUMAN	TRUE	-0.0794514	0.0348321	AGL	AGL GDE	Glycogen debranching enzyme	-2.26419	-2.1013	0.047102	0.239049	0.271153	2.35568	20	0.0186794	0.00738804	0.00857784	1532	cytoplasm [GO:0005737]; cytosol [GO:0005829]; extracellular region [GO:0005576]; ficolin-1-rich granule lumen [GO:1904813]; inclusion body [GO:0016234]; isoamylase complex [GO:0043033]; nucleus [GO:0005634]; sarcoplasmic reticulum [GO:0016529]; secretory granule lumen [GO:0034774]; 4-alpha-glucanotransferase activity [GO:0004134]; amylo-alpha-1,6-glucosidase activity [GO:0004135]; glycogen debran…	cytoplasm [GO:0005737]; cytosol [GO:0005829]; extracellular region [GO:0005576]; ficolin-1-rich granule lumen [GO:1904813]; inclusion body [GO:0016234]; isoamylase complex [GO:0043033]; nucleus [GO:0005634]; sarcoplasmic reticulum [GO:0016529]; secretory granule lumen [GO:0034774]; 4-alpha-glucanotransferase activity [GO:0004134]; amylo-alpha-1,6-glucosidase activity [GO:0004135]; glycogen debran…	cytoplasm [GO:0005737]; cytosol [GO:0005829]; extracellular region [GO:0005576]; ficolin-1-rich granule lumen [GO:1904813]; inclusion body [GO:0016234]; isoamylase complex [GO:0043033]; nucleus [GO:0005634]; sarcoplasmic reticulum [GO:0016529]; secretory granule lumen [GO:0034774]; 4-alpha-glucanotransferase activity [GO:0004134]; amylo-alpha-1,6-glucosidase activity [GO:0004135]; glycogen debran…	Alternative splicing; Complete proteome; Cytoplasm; Direct protein sequencing; Disease mutation; Glycogen biosynthesis; Glycogen storage disease; Glycosidase; Glycosyltransferase; Hydrolase; Multifunctional enzyme; Phosphoprotein; Polymorphism; Reference proteome; Transferase; Ubl conjugation	Multifunctional enzyme acting as 1,4-alpha-D-glucan:1,4-alpha-D-glucan 4-alpha-D-glycosyltransferase and amylo-1,6-glucosidase in glycogen degradation.	174764	175
FUCO_HUMAN	TRUE	-0.185229	0.0334944	FUCA1	NA	NA	-2.28317	-2.34933	0.0280377	0.235449	0.217957	2.35568	20	0.0186794	0.0394905	0.0372976	NA	NA	NA	NA	NA	NA	NA	NA
FRIL_HUMAN	TRUE	-0.360595	0.0233326	FTL	FTL	Ferritin light chain	-2.45572	-2.57452	0.0171666	0.202315	0.17705	2.35568	20	0.0186794	0.12937	0.117706	175	autolysosome [GO:0044754]; azurophil granule lumen [GO:0035578]; cytosol [GO:0005829]; extracellular exosome [GO:0070062]; extracellular region [GO:0005576]; intracellular ferritin complex [GO:0008043]; membrane [GO:0016020]; ferric iron binding [GO:0008199]; identical protein binding [GO:0042802]; iron ion binding [GO:0005506]; cellular iron ion homeostasis [GO:0006879]; intracellular sequesteri…	autolysosome [GO:0044754]; azurophil granule lumen [GO:0035578]; cytosol [GO:0005829]; extracellular exosome [GO:0070062]; extracellular region [GO:0005576]; intracellular ferritin complex [GO:0008043]; membrane [GO:0016020]; ferric iron binding [GO:0008199]; identical protein binding [GO:0042802]; iron ion binding [GO:0005506]; cellular iron ion homeostasis [GO:0006879]; intracellular sequesteri…	autolysosome [GO:0044754]; azurophil granule lumen [GO:0035578]; cytosol [GO:0005829]; extracellular exosome [GO:0070062]; extracellular region [GO:0005576]; intracellular ferritin complex [GO:0008043]; membrane [GO:0016020]; ferric iron binding [GO:0008199]; identical protein binding [GO:0042802]; iron ion binding [GO:0005506]; cellular iron ion homeostasis [GO:0006879]; intracellular sequesteri…	3D-structure; Acetylation; Cataract; Complete proteome; Direct protein sequencing; Disease mutation; Iron; Iron storage; Metal-binding; Neurodegeneration; Reference proteome	Stores iron in a soluble, non-toxic, readily available form. Important for iron homeostasis. Iron is taken up in the ferrous form and deposited as ferric hydroxides after oxidation. Also plays a role in delivery of iron to cells. Mediates iron uptake in capsule cells of the developing kidney (By similarity). {ECO:0000250, ECO:0000269|PubMed:19923220, ECO:0000269|PubMed:20159981}.	20020	20
FKB15_HUMAN	TRUE	-0.121147	0.0234712	FKBP15	FKBP15 KIAA0674	FK506-binding protein 15	-2.45293	-2.41798	0.0241873	0.202492	0.203929	2.35568	20	0.0186794	0.0146356	0.0150617	1219	actin filament [GO:0005884]; axon [GO:0030424]; early endosome [GO:0005769]; growth cone [GO:0030426]; membrane [GO:0016020]; actin binding [GO:0003779]; endocytosis [GO:0006897]; negative regulation of phosphatase activity [GO:0010923]	actin filament [GO:0005884]; axon [GO:0030424]; early endosome [GO:0005769]; growth cone [GO:0030426]; membrane [GO:0016020]; actin binding [GO:0003779]; endocytosis [GO:0006897]; negative regulation of phosphatase activity [GO:0010923]	actin filament [GO:0005884]; axon [GO:0030424]; early endosome [GO:0005769]; growth cone [GO:0030426]; membrane [GO:0016020]; actin binding [GO:0003779]; endocytosis [GO:0006897]; negative regulation of phosphatase activity [GO:0010923]	Acetylation; Actin-binding; Alternative splicing; Cell projection; Coiled coil; Complete proteome; Cytoplasm; Endocytosis; Endosome; Phosphoprotein; Polymorphism; Reference proteome; Transport	May be involved in the cytoskeletal organization of neuronal growth cones. Seems to be inactive as a PPIase (By similarity). Involved in the transport of early endosomes at the level of transition between microfilament-based and microtubule-based movement. {ECO:0000250, ECO:0000269|PubMed:19121306}.	133630	134
FHOD1_HUMAN	TRUE	-0.0728344	0.025669	FHOD1	FHOD1 FHOS FHOS1	FH1/FH2 domain-containing protein 1	-2.4106	-2.15269	0.042388	0.211538	0.260332	2.35568	20	0.0186794	0.00547738	0.00686851	1164	bleb [GO:0032059]; cytoplasm [GO:0005737]; cytoskeleton [GO:0005856]; cytosol [GO:0005829]; intercalated disc [GO:0014704]; membrane [GO:0016020]; nucleus [GO:0005634]; actin binding [GO:0003779]; identical protein binding [GO:0042802]; protein domain specific binding [GO:0019904]; protein self-association [GO:0043621]; establishment of centrosome localization [GO:0051660]; nuclear migration [GO:…	bleb [GO:0032059]; cytoplasm [GO:0005737]; cytoskeleton [GO:0005856]; cytosol [GO:0005829]; intercalated disc [GO:0014704]; membrane [GO:0016020]; nucleus [GO:0005634]; actin binding [GO:0003779]; identical protein binding [GO:0042802]; protein domain specific binding [GO:0019904]; protein self-association [GO:0043621]; establishment of centrosome localization [GO:0051660]; nuclear migration [GO:…	bleb [GO:0032059]; cytoplasm [GO:0005737]; cytoskeleton [GO:0005856]; cytosol [GO:0005829]; intercalated disc [GO:0014704]; membrane [GO:0016020]; nucleus [GO:0005634]; actin binding [GO:0003779]; identical protein binding [GO:0042802]; protein domain specific binding [GO:0019904]; protein self-association [GO:0043621]; establishment of centrosome localization [GO:0051660]; nuclear migration [GO:…	3D-structure; Actin-binding; Cell projection; Coiled coil; Complete proteome; Cytoplasm; Cytoskeleton; Direct protein sequencing; Phosphoprotein; Reference proteome	Required for the assembly of F-actin structures, such as stress fibers. Depends on the Rho-ROCK cascade for its activity. Contributes to the coordination of microtubules with actin fibers and plays a role in cell elongation. Acts synergistically with ROCK1 to promote SRC-dependent non-apoptotic plasma membrane blebbing. {ECO:0000269|PubMed:14576350, ECO:0000269|PubMed:15878344, ECO:0000269|PubMed…	126551	127
EXOSX_HUMAN	TRUE	-0.244699	0.0167589	EXOSC10	NA	NA	-3.28304	-3.00697	0.016073	0.17674	0.171515	2.35568	6	0.0186794	0.0111107	0.0132445	NA	NA	NA	NA	NA	NA	NA	NA
ERLN1_HUMAN	TRUE	-0.114136	0.0133466	ERLIN1	ERLIN1 C10orf69 KE04 KEO4 SPFH1	Erlin-1	-2.71453	-2.61183	0.015801	0.163368	0.171515	2.35568	20	0.0186794	0.0106074	0.011458	346	endoplasmic reticulum [GO:0005783]; endoplasmic reticulum membrane [GO:0005789]; integral component of membrane [GO:0016021]; protein complex [GO:0043234]; cholesterol binding [GO:0015485]; ubiquitin protein ligase binding [GO:0031625]; cholesterol metabolic process [GO:0008203]; negative regulation of cholesterol biosynthetic process [GO:0045541]; negative regulation of fatty acid biosynthetic p…	endoplasmic reticulum [GO:0005783]; endoplasmic reticulum membrane [GO:0005789]; integral component of membrane [GO:0016021]; protein complex [GO:0043234]; cholesterol binding [GO:0015485]; ubiquitin protein ligase binding [GO:0031625]; cholesterol metabolic process [GO:0008203]; negative regulation of cholesterol biosynthetic process [GO:0045541]; negative regulation of fatty acid biosynthetic p…	endoplasmic reticulum [GO:0005783]; endoplasmic reticulum membrane [GO:0005789]; integral component of membrane [GO:0016021]; protein complex [GO:0043234]; cholesterol binding [GO:0015485]; ubiquitin protein ligase binding [GO:0031625]; cholesterol metabolic process [GO:0008203]; negative regulation of cholesterol biosynthetic process [GO:0045541]; negative regulation of fatty acid biosynthetic p…	Acetylation; Cholesterol metabolism; Complete proteome; Direct protein sequencing; Disease mutation; Endoplasmic reticulum; Glycoprotein; Hereditary spastic paraplegia; Lipid metabolism; Lipid-binding; Membrane; Neurodegeneration; Reference proteome; Signal-anchor; Steroid metabolism; Sterol metabolism; Transmembrane; Transmembrane helix	Component of the ERLIN1/ERLIN2 complex which mediates the endoplasmic reticulum-associated degradation (ERAD) of inositol 1,4,5-trisphosphate receptors (IP3Rs). Involved in regulation of cellular cholesterol homeostasis by regulation the SREBP signaling pathway. Binds cholesterol and may promote ER retention of the SCAP-SREBF complex (PubMed:24217618). {ECO:0000269|PubMed:19240031, ECO:0000269|Pu…	38926	39
ENASE_HUMAN	TRUE	-0.309262	0.0483314	ENGASE	NA	NA	-2.17891	-2.31989	0.0344983	0.274928	0.234069	2.35568	13	0.0186794	0.0805811	0.0710849	NA	NA	NA	NA	NA	NA	NA	NA
DYSF_HUMAN	TRUE	-0.111998	0.00402153	DYSF	DYSF FER1L1	Dysferlin	-3.24882	-3.00268	0.00647897	0.123391	0.131675	2.35568	20	0.0186794	0.00713054	0.00834748	2080	cytoplasmic vesicle membrane [GO:0030659]; early endosome [GO:0005769]; endocytic vesicle [GO:0030139]; endosome [GO:0005768]; extracellular exosome [GO:0070062]; integral component of membrane [GO:0016021]; lamellipodium [GO:0030027]; late endosome [GO:0005770]; microtubule organizing center [GO:0005815]; plasma membrane [GO:0005886]; sarcolemma [GO:0042383]; T-tubule [GO:0030315]; calcium ion b…	cytoplasmic vesicle membrane [GO:0030659]; early endosome [GO:0005769]; endocytic vesicle [GO:0030139]; endosome [GO:0005768]; extracellular exosome [GO:0070062]; integral component of membrane [GO:0016021]; lamellipodium [GO:0030027]; late endosome [GO:0005770]; microtubule organizing center [GO:0005815]; plasma membrane [GO:0005886]; sarcolemma [GO:0042383]; T-tubule [GO:0030315]; calcium ion b…	cytoplasmic vesicle membrane [GO:0030659]; early endosome [GO:0005769]; endocytic vesicle [GO:0030139]; endosome [GO:0005768]; extracellular exosome [GO:0070062]; integral component of membrane [GO:0016021]; lamellipodium [GO:0030027]; late endosome [GO:0005770]; microtubule organizing center [GO:0005815]; plasma membrane [GO:0005886]; sarcolemma [GO:0042383]; T-tubule [GO:0030315]; calcium ion b…	3D-structure; Alternative promoter usage; Alternative splicing; Calcium; Cell membrane; Complete proteome; Cytoplasmic vesicle; Disease mutation; Limb-girdle muscular dystrophy; Lipid-binding; Membrane; Metal-binding; Phosphoprotein; Polymorphism; Reference proteome; Repeat; Signal-anchor; Transmembrane; Transmembrane helix	Key calcium ion sensor involved in the Ca(2+)-triggered synaptic vesicle-plasma membrane fusion. Plays a role in the sarcolemma repair mechanism of both skeletal muscle and cardiomyocytes that permits rapid resealing of membranes disrupted by mechanical stress (By similarity). {ECO:0000250}.	237295	237
DYLT1_HUMAN	TRUE	-0.0884198	0.0498611	DYNLT1	DYNLT1 TCTEL1 TCTEX-1 TCTEX1	Dynein light chain Tctex-type 1	-2.08736	-2.01093	0.056544	0.278169	0.288046	2.35568	20	0.0186794	0.010766	0.0115999	113	cytoplasmic dynein complex [GO:0005868]; cytoplasmic microtubule [GO:0005881]; extracellular region [GO:0005576]; ficolin-1-rich granule lumen [GO:1904813]; Golgi apparatus [GO:0005794]; host cell [GO:0043657]; secretory granule lumen [GO:0034774]; secretory vesicle [GO:0099503]; spindle [GO:0005819]; identical protein binding [GO:0042802]; motor activity [GO:0003774]; cell division [GO:0051301];…	cytoplasmic dynein complex [GO:0005868]; cytoplasmic microtubule [GO:0005881]; extracellular region [GO:0005576]; ficolin-1-rich granule lumen [GO:1904813]; Golgi apparatus [GO:0005794]; host cell [GO:0043657]; secretory granule lumen [GO:0034774]; secretory vesicle [GO:0099503]; spindle [GO:0005819]; identical protein binding [GO:0042802]; motor activity [GO:0003774]; cell division [GO:0051301];…	cytoplasmic dynein complex [GO:0005868]; cytoplasmic microtubule [GO:0005881]; extracellular region [GO:0005576]; ficolin-1-rich granule lumen [GO:1904813]; Golgi apparatus [GO:0005794]; host cell [GO:0043657]; secretory granule lumen [GO:0034774]; secretory vesicle [GO:0099503]; spindle [GO:0005819]; identical protein binding [GO:0042802]; motor activity [GO:0003774]; cell division [GO:0051301];…	3D-structure; Acetylation; Cell cycle; Cell division; Complete proteome; Cytoplasm; Cytoplasmic inwards viral transport; Cytoskeleton; Dynein; Golgi apparatus; Host-virus interaction; Microtubular inwards viral transport; Microtubule; Mitosis; Motor protein; Neurogenesis; Phosphoprotein; Reference proteome; Transport; Virus entry into host cell	Acts as one of several non-catalytic accessory components of the cytoplasmic dynein 1 complex that are thought to be involved in linking dynein to cargos and to adapter proteins that regulate dynein function. Cytoplasmic dynein 1 acts as a motor for the intracellular retrograde motility of vesicles and organelles along microtubules. Binds to transport cargos and is involved in apical cargo transp…	12452	12
DYH7_HUMAN	TRUE	-0.730573	0.0107129	DNAH7	DNAH7 KIAA0944	Dynein heavy chain 7, axonemal	-2.97646	-3.21244	0.00567157	0.15182	0.129453	2.35568	13	0.0186794	0.240983	0.20688	4024	axonemal dynein complex [GO:0005858]; cilium [GO:0005929]; cytosol [GO:0005829]; inner dynein arm [GO:0036156]; microtubule [GO:0005874]	ATP binding [GO:0005524]; ATP-dependent microtubule motor activity, minus-end-directed [GO:0008569]; calcium ion binding [GO:0005509]; dynein intermediate chain binding [GO:0045505]; dynein light chain binding [GO:0045503]; dynein light intermediate chain binding [GO:0051959]; microtubule motor activity [GO:0003777]	cilium-dependent cell motility [GO:0060285]; cilium movement [GO:0003341]; inner dynein arm assembly [GO:0036159]	ATP-binding; Alternative splicing; Cell projection; Cilium; Coiled coil; Complete proteome; Cytoplasm; Cytoskeleton; Dynein; Microtubule; Motor protein; Nucleotide-binding; Polymorphism; Reference proteome; Repeat	Force generating protein of respiratory cilia. Produces force towards the minus ends of microtubules. Dynein has ATPase activity; the force-producing power stroke is thought to occur on release of ADP (By similarity). {ECO:0000250}.	461159	461
DUPD1_HUMAN	TRUE	-0.207372	0.00191242	DUPD1	DUPD1 DUSP27	Dual specificity phosphatase DUPD1	-3.57111	-3.58564	0.0016167	0.112467	0.108611	2.35568	20	0.0186794	0.0202323	0.0200687	220	cytoplasm [GO:0005737]; protein tyrosine phosphatase activity [GO:0004725]; protein tyrosine/serine/threonine phosphatase activity [GO:0008138]	cytoplasm [GO:0005737]; protein tyrosine phosphatase activity [GO:0004725]; protein tyrosine/serine/threonine phosphatase activity [GO:0008138]	cytoplasm [GO:0005737]; protein tyrosine phosphatase activity [GO:0004725]; protein tyrosine/serine/threonine phosphatase activity [GO:0008138]	3D-structure; Complete proteome; Cytoplasm; Hydrolase; Polymorphism; Protein phosphatase; Reference proteome		25336	25
DPP2_HUMAN	TRUE	-0.154277	0.0175285	DPP7	DPP7 DPP2 QPP	Dipeptidyl peptidase 2	-2.58928	-2.60623	0.015999	0.179039	0.171515	2.35568	20	0.0186794	0.0213009	0.0210247	492	azurophil granule lumen [GO:0035578]; cytosol [GO:0005829]; extracellular exosome [GO:0070062]; extracellular region [GO:0005576]; Golgi apparatus [GO:0005794]; intracellular membrane-bounded organelle [GO:0043231]; vesicle [GO:0031982]; dipeptidyl-peptidase activity [GO:0008239]; serine-type peptidase activity [GO:0008236]; neutrophil degranulation [GO:0043312]	azurophil granule lumen [GO:0035578]; cytosol [GO:0005829]; extracellular exosome [GO:0070062]; extracellular region [GO:0005576]; Golgi apparatus [GO:0005794]; intracellular membrane-bounded organelle [GO:0043231]; vesicle [GO:0031982]; dipeptidyl-peptidase activity [GO:0008239]; serine-type peptidase activity [GO:0008236]; neutrophil degranulation [GO:0043312]	azurophil granule lumen [GO:0035578]; cytosol [GO:0005829]; extracellular exosome [GO:0070062]; extracellular region [GO:0005576]; Golgi apparatus [GO:0005794]; intracellular membrane-bounded organelle [GO:0043231]; vesicle [GO:0031982]; dipeptidyl-peptidase activity [GO:0008239]; serine-type peptidase activity [GO:0008236]; neutrophil degranulation [GO:0043312]	3D-structure; Aminopeptidase; Cleavage on pair of basic residues; Complete proteome; Cytoplasmic vesicle; Direct protein sequencing; Glycoprotein; Hydrolase; Lysosome; Polymorphism; Protease; Reference proteome; Secreted; Serine protease; Signal; Zymogen	Plays an important role in the degradation of some oligopeptides. {ECO:0000269|PubMed:15487984}.	54341	54
DDAH1_HUMAN	TRUE	-0.246463	0.00916079	DDAH1	DDAH1 DDAH	N	-2.88473	-2.97606	0.00689288	0.1426	0.132097	2.35568	20	0.0186794	0.0437971	0.0411504	285	cytosol [GO:0005829]; extracellular exosome [GO:0070062]; mitochondrion [GO:0005739]; amino acid binding [GO:0016597]; catalytic activity [GO:0003824]; dimethylargininase activity [GO:0016403]; metal ion binding [GO:0046872]; arginine catabolic process [GO:0006527]; citrulline metabolic process [GO:0000052]; nitric oxide mediated signal transduction [GO:0007263]; positive regulation of angiogenes…	cytosol [GO:0005829]; extracellular exosome [GO:0070062]; mitochondrion [GO:0005739]; amino acid binding [GO:0016597]; catalytic activity [GO:0003824]; dimethylargininase activity [GO:0016403]; metal ion binding [GO:0046872]; arginine catabolic process [GO:0006527]; citrulline metabolic process [GO:0000052]; nitric oxide mediated signal transduction [GO:0007263]; positive regulation of angiogenes…	cytosol [GO:0005829]; extracellular exosome [GO:0070062]; mitochondrion [GO:0005739]; amino acid binding [GO:0016597]; catalytic activity [GO:0003824]; dimethylargininase activity [GO:0016403]; metal ion binding [GO:0046872]; arginine catabolic process [GO:0006527]; citrulline metabolic process [GO:0000052]; nitric oxide mediated signal transduction [GO:0007263]; positive regulation of angiogenes…	3D-structure; Acetylation; Alternative splicing; Complete proteome; Direct protein sequencing; Hydrolase; Metal-binding; Reference proteome; S-nitrosylation; Zinc	Hydrolyzes N(G),N(G)-dimethyl-L-arginine (ADMA) and N(G)-monomethyl-L-arginine (MMA) which act as inhibitors of NOS. Has therefore a role in the regulation of nitric oxide generation.	31122	31
CUL4B_HUMAN	TRUE	-0.102254	0.0382027	CUL4B	CUL4B KIAA0695	Cullin-4B	-2.3064	-2.09581	0.0530607	0.249431	0.283201	2.35568	13	0.0186794	0.00786242	0.00952182	913	Cul4B-RING E3 ubiquitin ligase complex [GO:0031465]; cytosol [GO:0005829]; extracellular exosome [GO:0070062]; nucleoplasm [GO:0005654]; ubiquitin protein ligase binding [GO:0031625]; cell cycle [GO:0007049]; DNA damage response, detection of DNA damage [GO:0042769]; global genome nucleotide-excision repair [GO:0070911]; histone H2A monoubiquitination [GO:0035518]; neuron projection development […	Cul4B-RING E3 ubiquitin ligase complex [GO:0031465]; cytosol [GO:0005829]; extracellular exosome [GO:0070062]; nucleoplasm [GO:0005654]; ubiquitin protein ligase binding [GO:0031625]; cell cycle [GO:0007049]; DNA damage response, detection of DNA damage [GO:0042769]; global genome nucleotide-excision repair [GO:0070911]; histone H2A monoubiquitination [GO:0035518]; neuron projection development […	Cul4B-RING E3 ubiquitin ligase complex [GO:0031465]; cytosol [GO:0005829]; extracellular exosome [GO:0070062]; nucleoplasm [GO:0005654]; ubiquitin protein ligase binding [GO:0031625]; cell cycle [GO:0007049]; DNA damage response, detection of DNA damage [GO:0042769]; global genome nucleotide-excision repair [GO:0070911]; histone H2A monoubiquitination [GO:0035518]; neuron projection development […	3D-structure; Acetylation; Alternative splicing; Cell cycle; Complete proteome; DNA damage; DNA repair; Disease mutation; Dwarfism; Isopeptide bond; Mental retardation; Nucleus; Phosphoprotein; Polymorphism; Reference proteome; Ubl conjugation; Ubl conjugation pathway	Core component of multiple cullin-RING-based E3 ubiquitin-protein ligase complexes which mediate the ubiquitination and subsequent proteasomal degradation of target proteins. The functional specificity of the E3 ubiquitin-protein ligase complex depends on the variable substrate recognition subunit. CUL4B may act within the complex as a scaffold protein, contributing to catalysis through positioni…	103982	104
CSN8_HUMAN	TRUE	-0.0444844	0.0443544	COPS8	COPS8 CSN8	COP9 signalosome complex subunit 8	-2.14568	-1.66645	0.109575	0.265552	0.37945	2.35568	20	0.0186794	0.00257891	0.00427546	209	COP9 signalosome [GO:0008180]; cytosol [GO:0005829]; extracellular exosome [GO:0070062]; nucleoplasm [GO:0005654]; nucleus [GO:0005634]; perinuclear region of cytoplasm [GO:0048471]; activation of NF-kappaB-inducing kinase activity [GO:0007250]; COP9 signalosome assembly [GO:0010387]; negative regulation of cell proliferation [GO:0008285]; nucleotide-excision repair, DNA damage recognition [GO:00…	COP9 signalosome [GO:0008180]; cytosol [GO:0005829]; extracellular exosome [GO:0070062]; nucleoplasm [GO:0005654]; nucleus [GO:0005634]; perinuclear region of cytoplasm [GO:0048471]; activation of NF-kappaB-inducing kinase activity [GO:0007250]; COP9 signalosome assembly [GO:0010387]; negative regulation of cell proliferation [GO:0008285]; nucleotide-excision repair, DNA damage recognition [GO:00…	COP9 signalosome [GO:0008180]; cytosol [GO:0005829]; extracellular exosome [GO:0070062]; nucleoplasm [GO:0005654]; nucleus [GO:0005634]; perinuclear region of cytoplasm [GO:0048471]; activation of NF-kappaB-inducing kinase activity [GO:0007250]; COP9 signalosome assembly [GO:0010387]; negative regulation of cell proliferation [GO:0008285]; nucleotide-excision repair, DNA damage recognition [GO:00…	3D-structure; Alternative splicing; Complete proteome; Cytoplasm; Direct protein sequencing; Nucleus; Phosphoprotein; Reference proteome; Signalosome	Component of the COP9 signalosome complex (CSN), a complex involved in various cellular and developmental processes. The CSN complex is an essential regulator of the ubiquitin (Ubl) conjugation pathway by mediating the deneddylation of the cullin subunits of SCF-type E3 ligase complexes, leading to decrease the Ubl ligase activity of SCF-type complexes such as SCF, CSA or DDB2. The complex is als…	23226	23
CPSF3_HUMAN	TRUE	-0.204147	0.00650904	CPSF3	NA	NA	-3.23536	-3.19329	0.00590055	0.138767	0.130026	2.35568	13	0.0186794	0.0159257	0.0163481	NA	NA	NA	NA	NA	NA	NA	NA
CP131_HUMAN	TRUE	-0.246187	0.0111904	CEP131	CEP131 AZI1 KIAA1118	Centrosomal protein of 131 kDa	-3.61302	-3.18702	0.0121571	0.154132	0.155949	2.35568	6	0.0186794	0.00928584	0.0119341	1083	acrosomal vesicle [GO:0001669]; centriolar satellite [GO:0034451]; centrosome [GO:0005813]; ciliary transition zone [GO:0035869]; cytosol [GO:0005829]; intercellular bridge [GO:0045171]; intracellular membrane-bounded organelle [GO:0043231]; microtubule cytoskeleton [GO:0015630]; microtubule organizing center [GO:0005815]	protein complex binding [GO:0032403]; protein homodimerization activity [GO:0042803]	cell differentiation [GO:0030154]; ciliary basal body-plasma membrane docking [GO:0097711]; G2/M transition of mitotic cell cycle [GO:0000086]; intraciliary transport involved in cilium assembly [GO:0035735]; multicellular organism development [GO:0007275]; positive regulation of cell proliferation [GO:0008284]; positive regulation of intracellular protein transport [GO:0090316]; protein localiza…	Alternative splicing; Cell cycle; Cell projection; Cilium biogenesis/degradation; Complete proteome; Cytoplasm; Cytoplasmic vesicle; Cytoskeleton; Developmental protein; Differentiation; Phosphoprotein; Polymorphism; Reference proteome; Spermatogenesis; Transport; Ubl conjugation	Component of centriolar satellites contributing to the building of a complex and dynamic network required to regulate cilia/flagellum formation (PubMed:17954613, PubMed:24185901). In proliferating cells, MIB1-mediated ubiquitination induces its sequestration within centriolar satellites, precluding untimely cilia formation initiation (PubMed:24121310). In contrast, during normal and ultraviolet o…	122149	122
CNST_HUMAN	TRUE	-0.148168	0.0117502	CNST	CNST C1orf71	Consortin	-2.77247	-2.75941	0.0113382	0.156697	0.15273	2.35568	20	0.0186794	0.0171368	0.0172993	725	integral component of membrane [GO:0016021]; intracellular membrane-bounded organelle [GO:0043231]; membrane [GO:0016020]; plasma membrane [GO:0005886]; protein complex [GO:0043234]; trans-Golgi network [GO:0005802]; transport vesicle [GO:0030133]; connexin binding [GO:0071253]; phosphatase binding [GO:0019902]; negative regulation of phosphatase activity [GO:0010923]; positive regulation of Golg…	integral component of membrane [GO:0016021]; intracellular membrane-bounded organelle [GO:0043231]; membrane [GO:0016020]; plasma membrane [GO:0005886]; protein complex [GO:0043234]; trans-Golgi network [GO:0005802]; transport vesicle [GO:0030133]; connexin binding [GO:0071253]; phosphatase binding [GO:0019902]; negative regulation of phosphatase activity [GO:0010923]; positive regulation of Golg…	integral component of membrane [GO:0016021]; intracellular membrane-bounded organelle [GO:0043231]; membrane [GO:0016020]; plasma membrane [GO:0005886]; protein complex [GO:0043234]; trans-Golgi network [GO:0005802]; transport vesicle [GO:0030133]; connexin binding [GO:0071253]; phosphatase binding [GO:0019902]; negative regulation of phosphatase activity [GO:0010923]; positive regulation of Golg…	Alternative splicing; Cell membrane; Complete proteome; Cytoplasmic vesicle; Golgi apparatus; Membrane; Polymorphism; Reference proteome; Transmembrane; Transmembrane helix	Required for targeting of connexins to the plasma membrane. {ECO:0000269|PubMed:19864490}.	79597	80
CLCB_HUMAN	TRUE	-0.232797	0.000322726	CLTB	CLTB	Clathrin light chain B	-4.33334	-4.31548	0.000270723	0.0978309	0.0900284	2.35568	20	0.0186794	0.0173165	0.0174601	229	ciliary membrane [GO:0060170]; clathrin coat [GO:0030118]; clathrin coat of coated pit [GO:0030132]; clathrin coat of trans-Golgi network vesicle [GO:0030130]; clathrin vesicle coat [GO:0030125]; cytosol [GO:0005829]; intracellular membrane-bounded organelle [GO:0043231]; plasma membrane [GO:0005886]; trans-Golgi network [GO:0005802]; clathrin heavy chain binding [GO:0032050]; peptide binding [GO…	ciliary membrane [GO:0060170]; clathrin coat [GO:0030118]; clathrin coat of coated pit [GO:0030132]; clathrin coat of trans-Golgi network vesicle [GO:0030130]; clathrin vesicle coat [GO:0030125]; cytosol [GO:0005829]; intracellular membrane-bounded organelle [GO:0043231]; plasma membrane [GO:0005886]; trans-Golgi network [GO:0005802]; clathrin heavy chain binding [GO:0032050]; peptide binding [GO…	ciliary membrane [GO:0060170]; clathrin coat [GO:0030118]; clathrin coat of coated pit [GO:0030132]; clathrin coat of trans-Golgi network vesicle [GO:0030130]; clathrin vesicle coat [GO:0030125]; cytosol [GO:0005829]; intracellular membrane-bounded organelle [GO:0043231]; plasma membrane [GO:0005886]; trans-Golgi network [GO:0005802]; clathrin heavy chain binding [GO:0032050]; peptide binding [GO…	Acetylation; Alternative splicing; Calcium; Coated pit; Complete proteome; Cytoplasmic vesicle; Disulfide bond; Membrane; Phosphoprotein; Reference proteome	Clathrin is the major protein of the polyhedral coat of coated pits and vesicles.	25190	25
CJ071_HUMAN	TRUE	-0.109903	0.0265833	C10orf71	C10orf71	Uncharacterized protein C10orf71	-2.39398	-2.33597	0.0288492	0.213336	0.219124	2.35568	20	0.0186794	0.0126453	0.0132811	1435				Alternative splicing; Complete proteome; Phosphoprotein; Polymorphism; Reference proteome		156477	156
CHCH5_HUMAN	TRUE	-0.174826	0.00717789	CHCHD5	NA	NA	-3.99277	-2.76087	0.02365	0.138863	0.201963	2.35568	6	0.0186794	0.00383436	0.00801955	NA	NA	NA	NA	NA	NA	NA	NA
CELF2_HUMAN	TRUE	-0.196146	0.0120787	CELF2	NA	NA	-2.75996	-2.81749	0.00993349	0.157154	0.146759	2.35568	20	0.0186794	0.0303043	0.0290794	NA	NA	NA	NA	NA	NA	NA	NA
CDC5L_HUMAN	TRUE	-0.0515814	0.0419554	CDC5L	CDC5L KIAA0432 PCDC5RP	Cell division cycle 5-like protein	-2.17317	-1.7882	0.0873075	0.259752	0.345833	2.35568	20	0.0186794	0.00338025	0.00499236	802	catalytic step 2 spliceosome [GO:0071013]; cytoplasm [GO:0005737]; membrane [GO:0016020]; nuclear speck [GO:0016607]; nucleoplasm [GO:0005654]; nucleus [GO:0005634]; perinuclear region of cytoplasm [GO:0048471]; protein-DNA complex [GO:0032993]; Prp19 complex [GO:0000974]; DNA binding [GO:0003677]; leucine zipper domain binding [GO:0043522]; protein kinase binding [GO:0019901]; protein phosphatas…	catalytic step 2 spliceosome [GO:0071013]; cytoplasm [GO:0005737]; membrane [GO:0016020]; nuclear speck [GO:0016607]; nucleoplasm [GO:0005654]; nucleus [GO:0005634]; perinuclear region of cytoplasm [GO:0048471]; protein-DNA complex [GO:0032993]; Prp19 complex [GO:0000974]; DNA binding [GO:0003677]; leucine zipper domain binding [GO:0043522]; protein kinase binding [GO:0019901]; protein phosphatas…	catalytic step 2 spliceosome [GO:0071013]; cytoplasm [GO:0005737]; membrane [GO:0016020]; nuclear speck [GO:0016607]; nucleoplasm [GO:0005654]; nucleus [GO:0005634]; perinuclear region of cytoplasm [GO:0048471]; protein-DNA complex [GO:0032993]; Prp19 complex [GO:0000974]; DNA binding [GO:0003677]; leucine zipper domain binding [GO:0043522]; protein kinase binding [GO:0019901]; protein phosphatas…	3D-structure; Activator; Cell cycle; Chromosomal rearrangement; Coiled coil; Complete proteome; Cytoplasm; DNA damage; DNA repair; DNA-binding; Isopeptide bond; Nucleus; Phosphoprotein; Polymorphism; RNA-binding; Reference proteome; Repeat; Spliceosome; Transcription; Transcription regulation; Ubl conjugation; mRNA processing; mRNA splicing	DNA-binding protein involved in cell cycle control. May act as a transcription activator. Component of the PRP19-CDC5L complex that forms an integral part of the spliceosome and is required for activating pre-mRNA splicing. The PRP19-CDC5L complex may also play a role in the response to DNA damage (DDR). {ECO:0000269|PubMed:10570151, ECO:0000269|PubMed:11082045, ECO:0000269|PubMed:11101529, ECO:0…	92251	92
CD2B2_HUMAN	TRUE	-0.160799	0.0336675	CD2BP2	NA	NA	-2.28067	-2.32695	0.0294099	0.235449	0.219952	2.35568	20	0.0186794	0.0298259	0.0286514	NA	NA	NA	NA	NA	NA	NA	NA
CASP7_HUMAN	TRUE	-0.21922	0.0196513	CASP7	CASP7 MCH3	Caspase-7	-3.15653	-2.80762	0.0219694	0.185661	0.195787	2.35568	6	0.0186794	0.00964654	0.0121931	303	cytoplasm [GO:0005737]; cytosol [GO:0005829]; nucleoplasm [GO:0005654]; nucleus [GO:0005634]; cysteine-type endopeptidase activity [GO:0004197]; cysteine-type endopeptidase activity involved in execution phase of apoptosis [GO:0097200]; cysteine-type peptidase activity [GO:0008234]; peptidase activity [GO:0008233]; activation of cysteine-type endopeptidase activity involved in apoptotic process b…	cytoplasm [GO:0005737]; cytosol [GO:0005829]; nucleoplasm [GO:0005654]; nucleus [GO:0005634]; cysteine-type endopeptidase activity [GO:0004197]; cysteine-type endopeptidase activity involved in execution phase of apoptosis [GO:0097200]; cysteine-type peptidase activity [GO:0008234]; peptidase activity [GO:0008233]; activation of cysteine-type endopeptidase activity involved in apoptotic process b…	cytoplasm [GO:0005737]; cytosol [GO:0005829]; nucleoplasm [GO:0005654]; nucleus [GO:0005634]; cysteine-type endopeptidase activity [GO:0004197]; cysteine-type endopeptidase activity involved in execution phase of apoptosis [GO:0097200]; cysteine-type peptidase activity [GO:0008234]; peptidase activity [GO:0008233]; activation of cysteine-type endopeptidase activity involved in apoptotic process b…	3D-structure; Acetylation; Alternative splicing; Apoptosis; Complete proteome; Cytoplasm; Hydrolase; Phosphoprotein; Polymorphism; Protease; Reference proteome; Thiol protease; Zymogen	Involved in the activation cascade of caspases responsible for apoptosis execution. Cleaves and activates sterol regulatory element binding proteins (SREBPs). Proteolytically cleaves poly(ADP-ribose) polymerase (PARP) at a '216-Asp-|-Gly-217' bond. Overexpression promotes programmed cell death.	34277	34
CAH3_HUMAN	TRUE	-0.183746	0.0394415	CA3	CA3	Carbonic anhydrase 3	-2.20356	-2.27062	0.0331416	0.253469	0.232477	2.35568	20	0.0186794	0.0417193	0.0392915	260	cytosol [GO:0005829]; carbonate dehydratase activity [GO:0004089]; nickel cation binding [GO:0016151]; phosphatase activity [GO:0016791]; zinc ion binding [GO:0008270]; bicarbonate transport [GO:0015701]; one-carbon metabolic process [GO:0006730]; response to ethanol [GO:0045471]; response to oxidative stress [GO:0006979]	cytosol [GO:0005829]; carbonate dehydratase activity [GO:0004089]; nickel cation binding [GO:0016151]; phosphatase activity [GO:0016791]; zinc ion binding [GO:0008270]; bicarbonate transport [GO:0015701]; one-carbon metabolic process [GO:0006730]; response to ethanol [GO:0045471]; response to oxidative stress [GO:0006979]	cytosol [GO:0005829]; carbonate dehydratase activity [GO:0004089]; nickel cation binding [GO:0016151]; phosphatase activity [GO:0016791]; zinc ion binding [GO:0008270]; bicarbonate transport [GO:0015701]; one-carbon metabolic process [GO:0006730]; response to ethanol [GO:0045471]; response to oxidative stress [GO:0006979]	3D-structure; Acetylation; Complete proteome; Cytoplasm; Glutathionylation; Lyase; Metal-binding; Phosphoprotein; Polymorphism; Reference proteome; Zinc	Reversible hydration of carbon dioxide.	29557	30
BIRC6_HUMAN	TRUE	-0.0889547	0.0499749	BIRC6	BIRC6 KIAA1289	Baculoviral IAP repeat-containing protein 6	-2.08622	-2.01207	0.0564161	0.278169	0.288046	2.35568	20	0.0186794	0.0109086	0.0117275	4857	endosome [GO:0005768]; Golgi apparatus [GO:0005794]; intracellular membrane-bounded organelle [GO:0043231]; membrane [GO:0016020]; microtubule organizing center [GO:0005815]; midbody [GO:0030496]; spindle pole [GO:0000922]; trans-Golgi network [GO:0005802]; cysteine-type endopeptidase inhibitor activity [GO:0004869]; ubiquitin conjugating enzyme activity [GO:0061631]; ubiquitin-protein transferas…	endosome [GO:0005768]; Golgi apparatus [GO:0005794]; intracellular membrane-bounded organelle [GO:0043231]; membrane [GO:0016020]; microtubule organizing center [GO:0005815]; midbody [GO:0030496]; spindle pole [GO:0000922]; trans-Golgi network [GO:0005802]; cysteine-type endopeptidase inhibitor activity [GO:0004869]; ubiquitin conjugating enzyme activity [GO:0061631]; ubiquitin-protein transferas…	endosome [GO:0005768]; Golgi apparatus [GO:0005794]; intracellular membrane-bounded organelle [GO:0043231]; membrane [GO:0016020]; microtubule organizing center [GO:0005815]; midbody [GO:0030496]; spindle pole [GO:0000922]; trans-Golgi network [GO:0005802]; cysteine-type endopeptidase inhibitor activity [GO:0004869]; ubiquitin conjugating enzyme activity [GO:0061631]; ubiquitin-protein transferas…	3D-structure; Apoptosis; Cell cycle; Cell division; Complete proteome; Cytoplasm; Cytoskeleton; Endosome; Golgi apparatus; Membrane; Mitosis; Phosphoprotein; Protease inhibitor; Reference proteome; Thiol protease inhibitor; Transferase; Ubl conjugation; Ubl conjugation pathway	Anti-apoptotic protein which can regulate cell death by controlling caspases and by acting as an E3 ubiquitin-protein ligase. Has an unusual ubiquitin conjugation system in that it could combine in a single polypeptide, ubiquitin conjugating (E2) with ubiquitin ligase (E3) activity, forming a chimeric E2/E3 ubiquitin ligase. Its tragets include CASP9 and DIABLO/SMAC. Acts as an inhibitor of CASP3…	530255	530
BIN1_HUMAN	TRUE	-0.0981544	0.049295	BIN1	BIN1 AMPHL	Myc box-dependent-interacting protein 1	-2.09308	-2.04869	0.052411	0.277193	0.282643	2.35568	20	0.0186794	0.0131947	0.0137727	593	actin cytoskeleton [GO:0015629]; axon [GO:0030424]; axon initial segment [GO:0043194]; cytoplasm [GO:0005737]; cytosol [GO:0005829]; I band [GO:0031674]; lipid tube [GO:0060987]; membrane [GO:0016020]; node of Ranvier [GO:0033268]; nuclear envelope [GO:0005635]; T-tubule [GO:0030315]; Z disc [GO:0030018]; actin filament binding [GO:0051015]; identical protein binding [GO:0042802]; RNA polymerase …	actin cytoskeleton [GO:0015629]; axon [GO:0030424]; axon initial segment [GO:0043194]; cytoplasm [GO:0005737]; cytosol [GO:0005829]; I band [GO:0031674]; lipid tube [GO:0060987]; membrane [GO:0016020]; node of Ranvier [GO:0033268]; nuclear envelope [GO:0005635]; T-tubule [GO:0030315]; Z disc [GO:0030018]; actin filament binding [GO:0051015]; identical protein binding [GO:0042802]; RNA polymerase …	actin cytoskeleton [GO:0015629]; axon [GO:0030424]; axon initial segment [GO:0043194]; cytoplasm [GO:0005737]; cytosol [GO:0005829]; I band [GO:0031674]; lipid tube [GO:0060987]; membrane [GO:0016020]; node of Ranvier [GO:0033268]; nuclear envelope [GO:0005635]; T-tubule [GO:0030315]; Z disc [GO:0030018]; actin filament binding [GO:0051015]; identical protein binding [GO:0042802]; RNA polymerase …	3D-structure; Acetylation; Alternative splicing; Coiled coil; Complete proteome; Cytoplasm; Developmental protein; Differentiation; Disease mutation; Endocytosis; Host-virus interaction; Nucleus; Phosphoprotein; Reference proteome; SH3 domain; Tumor suppressor	May be involved in regulation of synaptic vesicle endocytosis. May act as a tumor suppressor and inhibits malignant cell transformation.	64699	65
BABA1_HUMAN	TRUE	-0.0474816	0.0473078	BABAM1	BABAM1 C19orf62 MERIT40 NBA1 HSPC142	BRISC and BRCA1-A complex member 1	-2.11364	-1.70063	0.102883	0.272583	0.371992	2.35568	20	0.0186794	0.0030279	0.00467714	329	BRCA1-A complex [GO:0070531]; BRISC complex [GO:0070552]; cytoplasm [GO:0005737]; cytosol [GO:0005829]; nuclear body [GO:0016604]; nucleoplasm [GO:0005654]; nucleus [GO:0005634]; cell cycle [GO:0007049]; cell division [GO:0051301]; covalent chromatin modification [GO:0016569]; double-strand break repair [GO:0006302]; double-strand break repair via nonhomologous end joining [GO:0006303]; G2 DNA da…	BRCA1-A complex [GO:0070531]; BRISC complex [GO:0070552]; cytoplasm [GO:0005737]; cytosol [GO:0005829]; nuclear body [GO:0016604]; nucleoplasm [GO:0005654]; nucleus [GO:0005634]; cell cycle [GO:0007049]; cell division [GO:0051301]; covalent chromatin modification [GO:0016569]; double-strand break repair [GO:0006302]; double-strand break repair via nonhomologous end joining [GO:0006303]; G2 DNA da…	BRCA1-A complex [GO:0070531]; BRISC complex [GO:0070552]; cytoplasm [GO:0005737]; cytosol [GO:0005829]; nuclear body [GO:0016604]; nucleoplasm [GO:0005654]; nucleus [GO:0005634]; cell cycle [GO:0007049]; cell division [GO:0051301]; covalent chromatin modification [GO:0016569]; double-strand break repair [GO:0006302]; double-strand break repair via nonhomologous end joining [GO:0006303]; G2 DNA da…	Acetylation; Alternative splicing; Cell cycle; Cell division; Chromatin regulator; Complete proteome; Cytoplasm; DNA damage; DNA repair; Mitosis; Nucleus; Phosphoprotein; Reference proteome; Ubl conjugation pathway	Component of the BRCA1-A complex, a complex that specifically recognizes 'Lys-63'-linked ubiquitinated histones H2A and H2AX at DNA lesions sites, leading to target the BRCA1-BARD1 heterodimer to sites of DNA damage at double-strand breaks (DSBs). The BRCA1-A complex also possesses deubiquitinase activity that specifically removes 'Lys-63'-linked ubiquitin on histones H2A and H2AX. In the BRCA1-A…	36560	37
ATE1_HUMAN	TRUE	-0.0723883	0.0450789	ATE1	ATE1	Arginyl-tRNA--protein transferase 1	-2.13765	-1.96728	0.0616817	0.267066	0.295685	2.35568	20	0.0186794	0.00688044	0.00812373	518	cytoplasm [GO:0005737]; nucleus [GO:0005634]; arginyltransferase activity [GO:0004057]; protein arginylation [GO:0016598]	cytoplasm [GO:0005737]; nucleus [GO:0005634]; arginyltransferase activity [GO:0004057]; protein arginylation [GO:0016598]	cytoplasm [GO:0005737]; nucleus [GO:0005634]; arginyltransferase activity [GO:0004057]; protein arginylation [GO:0016598]	Acyltransferase; Alternative splicing; Complete proteome; Cytoplasm; Nucleus; Phosphoprotein; Reference proteome; Transferase; Ubl conjugation pathway	Involved in the post-translational conjugation of arginine to the N-terminal aspartate or glutamate of a protein. This arginylation is required for degradation of the protein via the ubiquitin pathway. Does not arginylate cysteine residues (By similarity). {ECO:0000250}.	59090	59
AT2B2_HUMAN	TRUE	-0.227728	0.0128665	ATP2B2	ATP2B2 PMCA2	Plasma membrane calcium-transporting ATPase 2	-2.73123	-2.81433	0.0100054	0.161355	0.146759	2.35568	20	0.0186794	0.0417127	0.0392856	1243	apical plasma membrane [GO:0016324]; cell junction [GO:0030054]; cilium [GO:0005929]; cytoplasm [GO:0005737]; endoplasmic reticulum [GO:0005783]; extracellular exosome [GO:0070062]; integral component of plasma membrane [GO:0005887]; intracellular membrane-bounded organelle [GO:0043231]; neuronal cell body [GO:0043025]; plasma membrane [GO:0005886]; synapse [GO:0045202]; ATP binding [GO:0005524];…	apical plasma membrane [GO:0016324]; cell junction [GO:0030054]; cilium [GO:0005929]; cytoplasm [GO:0005737]; endoplasmic reticulum [GO:0005783]; extracellular exosome [GO:0070062]; integral component of plasma membrane [GO:0005887]; intracellular membrane-bounded organelle [GO:0043231]; neuronal cell body [GO:0043025]; plasma membrane [GO:0005886]; synapse [GO:0045202]; ATP binding [GO:0005524];…	apical plasma membrane [GO:0016324]; cell junction [GO:0030054]; cilium [GO:0005929]; cytoplasm [GO:0005737]; endoplasmic reticulum [GO:0005783]; extracellular exosome [GO:0070062]; integral component of plasma membrane [GO:0005887]; intracellular membrane-bounded organelle [GO:0043231]; neuronal cell body [GO:0043025]; plasma membrane [GO:0005886]; synapse [GO:0045202]; ATP binding [GO:0005524];…	ATP-binding; Alternative splicing; Calcium; Calcium transport; Calmodulin-binding; Cell junction; Cell membrane; Complete proteome; Hydrolase; Ion transport; Magnesium; Membrane; Metal-binding; Nucleotide-binding; Phosphoprotein; Reference proteome; Synapse; Transmembrane; Transmembrane helix; Transport	This magnesium-dependent enzyme catalyzes the hydrolysis of ATP coupled with the transport of calcium out of the cell.	136876	137
ASH2L_HUMAN	TRUE	-0.127363	0.0191622	ASH2L	ASH2L ASH2L1	Set1/Ash2 histone methyltransferase complex subunit ASH2	-2.54792	-2.51553	0.0195525	0.183709	0.185823	2.35568	20	0.0186794	0.0149923	0.0153809	628	histone methyltransferase complex [GO:0035097]; MLL1 complex [GO:0071339]; MLL3/4 complex [GO:0044666]; nuclear euchromatin [GO:0005719]; nucleoplasm [GO:0005654]; nucleus [GO:0005634]; Set1C/COMPASS complex [GO:0048188]	beta-catenin binding [GO:0008013]; DNA binding [GO:0003677]; euchromatin binding [GO:1990188]; histone-lysine N-methyltransferase activity [GO:0018024]; metal ion binding [GO:0046872]; transcription regulatory region DNA binding [GO:0044212]	beta-catenin-TCF complex assembly [GO:1904837]; cellular response to DNA damage stimulus [GO:0006974]; hemopoiesis [GO:0030097]; histone H3-K4 methylation [GO:0051568]; positive regulation of cell proliferation [GO:0008284]; positive regulation of transcription from RNA polymerase II promoter [GO:0045944]; regulation of megakaryocyte differentiation [GO:0045652]; regulation of transcription, DNA-…	3D-structure; Acetylation; Alternative splicing; Chromatin regulator; Complete proteome; DNA-binding; Metal-binding; Methylation; Nucleus; Phosphoprotein; Polymorphism; Reference proteome; Transcription; Transcription regulation; Zinc; Zinc-finger	Component of the Set1/Ash2 histone methyltransferase (HMT) complex, a complex that specifically methylates 'Lys-4' of histone H3, but not if the neighboring 'Lys-9' residue is already methylated. As part of the MLL1/MLL complex it is involved in methylation and dimethylation at 'Lys-4' of histone H3. May function as a transcriptional regulator. May play a role in hematopoiesis. {ECO:0000269|PubMe…	68723	69
ASAP3_HUMAN	TRUE	-0.292548	0.00133222	ASAP3	NA	NA	-4.06737	-4.09807	0.000908198	0.110718	0.108611	2.35568	13	0.0186794	0.0206931	0.0203842	NA	NA	NA	NA	NA	NA	NA	NA
ARVC_HUMAN	TRUE	-0.132299	0.0343898	ARVCF	ARVCF	Armadillo repeat protein deleted in velo-cardio-facial syndrome	-2.27039	-2.2804	0.0324638	0.238173	0.230538	2.35568	20	0.0186794	0.0203735	0.020195	962	cytoplasm [GO:0005737]; intracellular [GO:0005622]; nucleus [GO:0005634]; plasma membrane [GO:0005886]; calcium-dependent cell-cell adhesion via plasma membrane cell adhesion molecules [GO:0016339]; cell adhesion [GO:0007155]; multicellular organism development [GO:0007275]; single organismal cell-cell adhesion [GO:0016337]	cytoplasm [GO:0005737]; intracellular [GO:0005622]; nucleus [GO:0005634]; plasma membrane [GO:0005886]; calcium-dependent cell-cell adhesion via plasma membrane cell adhesion molecules [GO:0016339]; cell adhesion [GO:0007155]; multicellular organism development [GO:0007275]; single organismal cell-cell adhesion [GO:0016337]	cytoplasm [GO:0005737]; intracellular [GO:0005622]; nucleus [GO:0005634]; plasma membrane [GO:0005886]; calcium-dependent cell-cell adhesion via plasma membrane cell adhesion molecules [GO:0016339]; cell adhesion [GO:0007155]; multicellular organism development [GO:0007275]; single organismal cell-cell adhesion [GO:0016337]	Alternative splicing; Cell adhesion; Coiled coil; Complete proteome; Methylation; Phosphoprotein; Polymorphism; Reference proteome; Repeat	Involved in protein-protein interactions at adherens junctions.	104642	105
ARHL1_HUMAN	TRUE	-0.173525	0.0154666	ADPRHL1	ADPRHL1 ARH2	[Protein ADP-ribosylarginine] hydrolase-like protein 1	-2.64701	-2.6863	0.0133749	0.171581	0.159996	2.35568	20	0.0186794	0.0257849	0.0250362	354	endomembrane system [GO:0012505]; intracellular [GO:0005622]; ADP-ribosylarginine hydrolase activity [GO:0003875]; GTPase activator activity [GO:0005096]; magnesium ion binding [GO:0000287]; Rab GTPase binding [GO:0017137]; activation of GTPase activity [GO:0090630]; intracellular protein transport [GO:0006886]; protein de-ADP-ribosylation [GO:0051725]; regulation of vesicle fusion [GO:0031338]	endomembrane system [GO:0012505]; intracellular [GO:0005622]; ADP-ribosylarginine hydrolase activity [GO:0003875]; GTPase activator activity [GO:0005096]; magnesium ion binding [GO:0000287]; Rab GTPase binding [GO:0017137]; activation of GTPase activity [GO:0090630]; intracellular protein transport [GO:0006886]; protein de-ADP-ribosylation [GO:0051725]; regulation of vesicle fusion [GO:0031338]	endomembrane system [GO:0012505]; intracellular [GO:0005622]; ADP-ribosylarginine hydrolase activity [GO:0003875]; GTPase activator activity [GO:0005096]; magnesium ion binding [GO:0000287]; Rab GTPase binding [GO:0017137]; activation of GTPase activity [GO:0090630]; intracellular protein transport [GO:0006886]; protein de-ADP-ribosylation [GO:0051725]; regulation of vesicle fusion [GO:0031338]	Alternative splicing; Complete proteome; Hydrolase; Phosphoprotein; Polymorphism; Reference proteome		40105	40
ARFRP_HUMAN	TRUE	-0.282254	0.0163381	ARFRP1	NA	NA	-2.75636	-2.88168	0.0111997	0.175569	0.152142	2.35568	13	0.0186794	0.0419438	0.0383749	NA	NA	NA	NA	NA	NA	NA	NA
AR6P6_HUMAN	TRUE	-0.190321	0.0398612	ARL6IP6	NA	NA	-2.28348	-2.34315	0.032967	0.255163	0.232116	2.35568	13	0.0186794	0.0277868	0.0263896	NA	NA	NA	NA	NA	NA	NA	NA
ANGI_HUMAN	TRUE	-0.190308	0.0165064	ANG	NA	NA	-2.61704	-2.67566	0.0136985	0.175569	0.161063	2.35568	20	0.0186794	0.031728	0.0303531	NA	NA	NA	NA	NA	NA	NA	NA
AKP13_HUMAN	TRUE	-0.104612	0.0406074	AKAP13	NA	NA	-2.27346	-2.08853	0.0537959	0.256561	0.285535	2.35568	13	0.0186794	0.00846934	0.0100356	NA	NA	NA	NA	NA	NA	NA	NA
AGO3_HUMAN	TRUE	-0.0719162	0.0211187	AGO3	AGO3 EIF2C3	Protein argonaute-3	-2.50254	-2.20177	0.0382871	0.190356	0.2476	2.35568	20	0.0186794	0.00495499	0.00640117	860	condensed nuclear chromosome [GO:0000794]; cytoplasm [GO:0005737]; cytosol [GO:0005829]; membrane [GO:0016020]; micro-ribonucleoprotein complex [GO:0035068]; nucleoplasm [GO:0005654]; P-body [GO:0000932]; RISC complex [GO:0016442]; RISC-loading complex [GO:0070578]; double-stranded RNA binding [GO:0003725]; miRNA binding [GO:0035198]; RNA binding [GO:0003723]; single-stranded RNA binding [GO:0003…	condensed nuclear chromosome [GO:0000794]; cytoplasm [GO:0005737]; cytosol [GO:0005829]; membrane [GO:0016020]; micro-ribonucleoprotein complex [GO:0035068]; nucleoplasm [GO:0005654]; P-body [GO:0000932]; RISC complex [GO:0016442]; RISC-loading complex [GO:0070578]; double-stranded RNA binding [GO:0003725]; miRNA binding [GO:0035198]; RNA binding [GO:0003723]; single-stranded RNA binding [GO:0003…	condensed nuclear chromosome [GO:0000794]; cytoplasm [GO:0005737]; cytosol [GO:0005829]; membrane [GO:0016020]; micro-ribonucleoprotein complex [GO:0035068]; nucleoplasm [GO:0005654]; P-body [GO:0000932]; RISC complex [GO:0016442]; RISC-loading complex [GO:0070578]; double-stranded RNA binding [GO:0003725]; miRNA binding [GO:0035198]; RNA binding [GO:0003723]; single-stranded RNA binding [GO:0003…	Acetylation; Alternative splicing; Complete proteome; Cytoplasm; Phosphoprotein; RNA-binding; RNA-mediated gene silencing; Reference proteome; Ribonucleoprotein; Translation regulation	Required for RNA-mediated gene silencing (RNAi). Binds to short RNAs such as microRNAs (miRNAs) and represses the translation of mRNAs which are complementary to them. Lacks endonuclease activity and does not appear to cleave target mRNAs. Proposed to be involved in stabilization of small RNA derivates (riRNA) derived from processed RNA polymerase III-transcribed Alu repeats containing a DR2 reti…	97360	97
AEDO_HUMAN	TRUE	-0.181532	0.00423782	ADO	ADO C10orf22	2-aminoethanethiol dioxygenase	-3.22591	-3.22878	0.00380677	0.124774	0.113704	2.35568	20	0.0186794	0.019	0.0189662	270	cytosol [GO:0005829]; mitochondrion [GO:0005739]; cysteamine dioxygenase activity [GO:0047800]; metal ion binding [GO:0046872]; oxidation-reduction process [GO:0055114]; sulfur amino acid catabolic process [GO:0000098]	cytosol [GO:0005829]; mitochondrion [GO:0005739]; cysteamine dioxygenase activity [GO:0047800]; metal ion binding [GO:0046872]; oxidation-reduction process [GO:0055114]; sulfur amino acid catabolic process [GO:0000098]	cytosol [GO:0005829]; mitochondrion [GO:0005739]; cysteamine dioxygenase activity [GO:0047800]; metal ion binding [GO:0046872]; oxidation-reduction process [GO:0055114]; sulfur amino acid catabolic process [GO:0000098]	Complete proteome; Dioxygenase; Iron; Metal-binding; Oxidoreductase; Polymorphism; Reference proteome		29751	30
ACTZ_HUMAN	TRUE	-0.0527875	0.0455746	ACTR1A	ACTR1A CTRN1	Alpha-centractin	-2.13221	-1.78314	0.088149	0.268594	0.346484	2.35568	20	0.0186794	0.00367748	0.00525828	376	centriole [GO:0005814]; centrosome [GO:0005813]; COPI-coated vesicle [GO:0030137]; cytoplasm [GO:0005737]; cytosol [GO:0005829]; dynactin complex [GO:0005869]; extracellular exosome [GO:0070062]; manchette [GO:0002177]; microtubule associated complex [GO:0005875]; microtubule cytoskeleton [GO:0015630]; myelin sheath [GO:0043209]; ATP binding [GO:0005524]; antigen processing and presentation of ex…	centriole [GO:0005814]; centrosome [GO:0005813]; COPI-coated vesicle [GO:0030137]; cytoplasm [GO:0005737]; cytosol [GO:0005829]; dynactin complex [GO:0005869]; extracellular exosome [GO:0070062]; manchette [GO:0002177]; microtubule associated complex [GO:0005875]; microtubule cytoskeleton [GO:0015630]; myelin sheath [GO:0043209]; ATP binding [GO:0005524]; antigen processing and presentation of ex…	centriole [GO:0005814]; centrosome [GO:0005813]; COPI-coated vesicle [GO:0030137]; cytoplasm [GO:0005737]; cytosol [GO:0005829]; dynactin complex [GO:0005869]; extracellular exosome [GO:0070062]; manchette [GO:0002177]; microtubule associated complex [GO:0005875]; microtubule cytoskeleton [GO:0015630]; myelin sheath [GO:0043209]; ATP binding [GO:0005524]; antigen processing and presentation of ex…	ATP-binding; Acetylation; Complete proteome; Cytoplasm; Cytoskeleton; Direct protein sequencing; Nucleotide-binding; Reference proteome	Component of a multi-subunit complex involved in microtubule based vesicle motility. It is associated with the centrosome.	42614	43
ACTY_HUMAN	TRUE	-0.119027	0.000816005	ACTR1B	ACTR1B CTRN2	Beta-centractin	-3.93655	-3.51611	0.0019128	0.110441	0.108611	2.35568	20	0.0186794	0.0054854	0.00687569	376	centrosome [GO:0005813]; cytoplasm [GO:0005737]; cytosol [GO:0005829]; dynactin complex [GO:0005869]; extracellular exosome [GO:0070062]; extracellular region [GO:0005576]; ficolin-1-rich granule lumen [GO:1904813]; membrane [GO:0016020]; microtubule cytoskeleton [GO:0015630]; secretory granule lumen [GO:0034774]; ATP binding [GO:0005524]; antigen processing and presentation of exogenous peptide …	centrosome [GO:0005813]; cytoplasm [GO:0005737]; cytosol [GO:0005829]; dynactin complex [GO:0005869]; extracellular exosome [GO:0070062]; extracellular region [GO:0005576]; ficolin-1-rich granule lumen [GO:1904813]; membrane [GO:0016020]; microtubule cytoskeleton [GO:0015630]; secretory granule lumen [GO:0034774]; ATP binding [GO:0005524]; antigen processing and presentation of exogenous peptide …	centrosome [GO:0005813]; cytoplasm [GO:0005737]; cytosol [GO:0005829]; dynactin complex [GO:0005869]; extracellular exosome [GO:0070062]; extracellular region [GO:0005576]; ficolin-1-rich granule lumen [GO:1904813]; membrane [GO:0016020]; microtubule cytoskeleton [GO:0015630]; secretory granule lumen [GO:0034774]; ATP binding [GO:0005524]; antigen processing and presentation of exogenous peptide …	ATP-binding; Acetylation; Complete proteome; Cytoplasm; Cytoskeleton; Direct protein sequencing; Nitration; Nucleotide-binding; Polymorphism; Reference proteome	Component of a multi-subunit complex involved in microtubule based vesicle motility. It is associated with the centrosome.	42293	42
ABEC2_HUMAN	TRUE	-0.187088	0.00177513	APOBEC2	APOBEC2	C->U-editing enzyme APOBEC-2	-3.60319	-3.57417	0.00166225	0.112467	0.108611	2.35568	20	0.0186794	0.0161758	0.0164397	224	cytidine deaminase activity [GO:0004126]; RNA binding [GO:0003723]; zinc ion binding [GO:0008270]; cytidine to uridine editing [GO:0016554]; DNA demethylation [GO:0080111]; mRNA modification [GO:0016556]; mRNA processing [GO:0006397]	cytidine deaminase activity [GO:0004126]; RNA binding [GO:0003723]; zinc ion binding [GO:0008270]; cytidine to uridine editing [GO:0016554]; DNA demethylation [GO:0080111]; mRNA modification [GO:0016556]; mRNA processing [GO:0006397]	cytidine deaminase activity [GO:0004126]; RNA binding [GO:0003723]; zinc ion binding [GO:0008270]; cytidine to uridine editing [GO:0016554]; DNA demethylation [GO:0080111]; mRNA modification [GO:0016556]; mRNA processing [GO:0006397]	3D-structure; Complete proteome; Hydrolase; Metal-binding; Polymorphism; Reference proteome; Zinc; mRNA processing	Probable C to U editing enzyme whose physiological substrate is not yet known. Does not display detectable apoB mRNA editing. Has a low intrinsic cytidine deaminase activity. May play a role in the epigenetic regulation of gene expression through the process of active DNA demethylation. {ECO:0000269|PubMed:17187054, ECO:0000269|PubMed:21496894}.	25703	26
5NT1A_HUMAN	TRUE	-0.168023	0.0145848	NT5C1A	NT5C1A	Cytosolic 5'-nucleotidase 1A	-2.67396	-2.70426	0.0128446	0.168668	0.157885	2.35568	20	0.0186794	0.0236909	0.0231628	368	cytosol [GO:0005829]; 5'-nucleotidase activity [GO:0008253]; magnesium ion binding [GO:0000287]; nucleotide binding [GO:0000166]; adenosine metabolic process [GO:0046085]; nucleoside metabolic process [GO:0009116]; purine nucleoside monophosphate catabolic process [GO:0009128]; purine nucleotide catabolic process [GO:0006195]; pyrimidine nucleoside catabolic process [GO:0046135]	cytosol [GO:0005829]; 5'-nucleotidase activity [GO:0008253]; magnesium ion binding [GO:0000287]; nucleotide binding [GO:0000166]; adenosine metabolic process [GO:0046085]; nucleoside metabolic process [GO:0009116]; purine nucleoside monophosphate catabolic process [GO:0009128]; purine nucleotide catabolic process [GO:0006195]; pyrimidine nucleoside catabolic process [GO:0046135]	cytosol [GO:0005829]; 5'-nucleotidase activity [GO:0008253]; magnesium ion binding [GO:0000287]; nucleotide binding [GO:0000166]; adenosine metabolic process [GO:0046085]; nucleoside metabolic process [GO:0009116]; purine nucleoside monophosphate catabolic process [GO:0009128]; purine nucleotide catabolic process [GO:0006195]; pyrimidine nucleoside catabolic process [GO:0046135]	Complete proteome; Cytoplasm; Hydrolase; Magnesium; Nucleotide metabolism; Nucleotide-binding; Reference proteome	Dephosphorylates the 5' and 2'(3')-phosphates of deoxyribonucleotides and has a broad substrate specificity. Helps to regulate adenosine levels in heart during ischemia and hypoxia. {ECO:0000269|PubMed:11133996}.	41021	41
1A24_HUMAN	TRUE	-0.825223	0.0410162	HLA-A	NA	NA	-2.59354	-3.00665	0.016081	0.257514	0.171515	2.35568	6	0.0186794	0.202481	0.150663	NA	NA	NA	NA	NA	NA	NA	NA

## Sheet: MA_UniqueProteome (MA+)
MasterAthlete Exclusive Proteome (Overrepresented)
ProteinID	Overrepresented	log2FC	FC	p.ord	GenePrimary	Genenames	ProteinDesc.1	t.ord	t.mod	p.mod	q.ord	q.mod	df.0	df.r	s2.0	s2	s2.post	Length.y	GOCC	GOMF	GOBP	Keywords.y	Function	Pathway	Mass	MassKDa
ZNT9_HUMAN	TRUE	0.167514	1.12312	0.0271541	SLC30A9	SLC30A9 C4orf1 HUEL	Zinc transporter 9	2.48884	2.48297	0.0250289	0.215363	0.206452	2.35568	13	0.0186794	0.0181205	0.0182062	568	cytoskeleton [GO:0005856]; integral component of membrane [GO:0016021]; nucleus [GO:0005634]; cation transmembrane transporter activity [GO:0008324]; chromatin binding [GO:0003682]; ligand-dependent nuclear receptor binding [GO:0016922]; ligand-dependent nuclear receptor transcription coactivator activity [GO:0030374]; transcription factor activity, sequence-specific DNA binding [GO:0003700]; nuc…	cytoskeleton [GO:0005856]; integral component of membrane [GO:0016021]; nucleus [GO:0005634]; cation transmembrane transporter activity [GO:0008324]; chromatin binding [GO:0003682]; ligand-dependent nuclear receptor binding [GO:0016922]; ligand-dependent nuclear receptor transcription coactivator activity [GO:0030374]; transcription factor activity, sequence-specific DNA binding [GO:0003700]; nuc…	cytoskeleton [GO:0005856]; integral component of membrane [GO:0016021]; nucleus [GO:0005634]; cation transmembrane transporter activity [GO:0008324]; chromatin binding [GO:0003682]; ligand-dependent nuclear receptor binding [GO:0016922]; ligand-dependent nuclear receptor transcription coactivator activity [GO:0030374]; transcription factor activity, sequence-specific DNA binding [GO:0003700]; nuc…	3D-structure; Complete proteome; Ion transport; Membrane; Nucleus; Polymorphism; Reference proteome; Transcription; Transcription regulation; Transmembrane; Transmembrane helix; Transport; Zinc; Zinc transport	Plays a role in the p160 coactivator signaling pathway that mediates transcriptional activation by nuclear receptors. Plays a role in transcriptional activation of Wnt-responsive genes. {ECO:0000250, ECO:0000269|PubMed:10409434}.	FALSE	63515	64
ZN469_HUMAN	TRUE	0.3482	1.27297	0.0442943	ZNF469	NA	NA	2.53642	2.73861	0.0244958	0.265516	0.204245	2.35568	6	0.0186794	0.0376916	0.0323316	NA	NA	NA	NA	NA	NA	NA	NA	NA
ZBED1_HUMAN	TRUE	0.375789	1.29755	0.00763438	ZBED1	NA	NA	3.93889	3.92447	0.00403128	0.138894	0.115691	2.35568	6	0.0186794	0.0182041	0.0183381	NA	NA	NA	NA	NA	NA	NA	NA	NA
Z385B_HUMAN	TRUE	0.381283	1.3025	0.00450731	ZNF385B	NA	NA	4.41248	4.26427	0.00248545	0.127018	0.111706	2.35568	6	0.0186794	0.0149335	0.0159895	NA	NA	NA	NA	NA	NA	NA	NA	NA
YMEL1_HUMAN	TRUE	0.0900922	1.06444	0.0245066	YME1L1	YME1L1 FTSH1 YME1L UNQ1868/PRO4304	ATP-dependent zinc metalloprotease YME1L1	2.43255	2.28452	0.0321822	0.205763	0.230299	2.35568	20	0.0186794	0.00823008	0.00933115	773	integral component of membrane [GO:0016021]; membrane [GO:0016020]; mitochondrial inner membrane [GO:0005743]; mitochondrion [GO:0005739]; nuclear body [GO:0016604]; ATP binding [GO:0005524]; ATP-dependent peptidase activity [GO:0004176]; metal ion binding [GO:0046872]; metalloendopeptidase activity [GO:0004222]; metallopeptidase activity [GO:0008237]; cell proliferation [GO:0008283]; misfolded o…	integral component of membrane [GO:0016021]; membrane [GO:0016020]; mitochondrial inner membrane [GO:0005743]; mitochondrion [GO:0005739]; nuclear body [GO:0016604]; ATP binding [GO:0005524]; ATP-dependent peptidase activity [GO:0004176]; metal ion binding [GO:0046872]; metalloendopeptidase activity [GO:0004222]; metallopeptidase activity [GO:0008237]; cell proliferation [GO:0008283]; misfolded o…	integral component of membrane [GO:0016021]; membrane [GO:0016020]; mitochondrial inner membrane [GO:0005743]; mitochondrion [GO:0005739]; nuclear body [GO:0016604]; ATP binding [GO:0005524]; ATP-dependent peptidase activity [GO:0004176]; metal ion binding [GO:0046872]; metalloendopeptidase activity [GO:0004222]; metallopeptidase activity [GO:0008237]; cell proliferation [GO:0008283]; misfolded o…	ATP-binding; Alternative splicing; Complete proteome; Disease mutation; Hydrolase; Membrane; Metal-binding; Metalloprotease; Mitochondrion; Mitochondrion inner membrane; Nucleotide-binding; Protease; Reference proteome; Transmembrane; Transmembrane helix; Zinc	Putative ATP-dependent protease. Plays a role in mitochondrial organization and mitochondrial protein metabolism, including degradation of PRELID1 and OPA1 (PubMed:18076378, PubMed:27495975). Ensures cell proliferation, maintains normal cristae morphology and complex I respiration activity, promotes antiapoptotic activity and protects mitochondria from the accumulation of oxidatively damaged memb…	FALSE	86455	86
WDR12_HUMAN	TRUE	0.227897	1.17113	0.0227042	WDR12	WDR12	Ribosome biogenesis protein WDR12	2.46857	2.55551	0.017904	0.198864	0.179372	2.35568	20	0.0186794	0.0511371	0.047717	423	nucleolus [GO:0005730]; nucleoplasm [GO:0005654]; PeBoW complex [GO:0070545]; preribosome, large subunit precursor [GO:0030687]		cell proliferation [GO:0008283]; maturation of 5.8S rRNA from tricistronic rRNA transcript (SSU-rRNA, 5.8S rRNA, LSU-rRNA) [GO:0000466]; maturation of LSU-rRNA from tricistronic rRNA transcript (SSU-rRNA, 5.8S rRNA, LSU-rRNA) [GO:0000463]; Notch signaling pathway [GO:0007219]; ribosomal large subunit biogenesis [GO:0042273]; rRNA processing [GO:0006364]	Acetylation; Complete proteome; Isopeptide bond; Nucleus; Phosphoprotein; Polymorphism; Reference proteome; Repeat; Ribosome biogenesis; Ubl conjugation; WD repeat; rRNA processing	Component of the PeBoW complex, which is required for maturation of 28S and 5.8S ribosomal RNAs and formation of the 60S ribosome. {ECO:0000255|HAMAP-Rule:MF_03029, ECO:0000269|PubMed:16043514, ECO:0000269|PubMed:17353269}.		47708	48
VDAC2_HUMAN	TRUE	0.139264	1.10134	0.0202076	VDAC2	VDAC2	Voltage-dependent anion-selective channel protein 2	2.52316	2.52025	0.0193509	0.187662	0.185003	2.35568	20	0.0186794	0.0182785	0.0183208	294	extracellular exosome [GO:0070062]; membrane raft [GO:0045121]; mitochondrial inner membrane [GO:0005743]; mitochondrial nucleoid [GO:0042645]; mitochondrial outer membrane [GO:0005741]; mitochondrion [GO:0005739]; myelin sheath [GO:0043209]; nucleus [GO:0005634]; pore complex [GO:0046930]; synaptic vesicle [GO:0008021]; nucleotide binding [GO:0000166]; porin activity [GO:0015288]; voltage-gated …	extracellular exosome [GO:0070062]; membrane raft [GO:0045121]; mitochondrial inner membrane [GO:0005743]; mitochondrial nucleoid [GO:0042645]; mitochondrial outer membrane [GO:0005741]; mitochondrion [GO:0005739]; myelin sheath [GO:0043209]; nucleus [GO:0005634]; pore complex [GO:0046930]; synaptic vesicle [GO:0008021]; nucleotide binding [GO:0000166]; porin activity [GO:0015288]; voltage-gated …	extracellular exosome [GO:0070062]; membrane raft [GO:0045121]; mitochondrial inner membrane [GO:0005743]; mitochondrial nucleoid [GO:0042645]; mitochondrial outer membrane [GO:0005741]; mitochondrion [GO:0005739]; myelin sheath [GO:0043209]; nucleus [GO:0005634]; pore complex [GO:0046930]; synaptic vesicle [GO:0008021]; nucleotide binding [GO:0000166]; porin activity [GO:0015288]; voltage-gated …	Acetylation; Alternative splicing; Complete proteome; Direct protein sequencing; Ion transport; Isopeptide bond; Membrane; Mitochondrion; Mitochondrion outer membrane; NAD; Nucleotide-binding; Polymorphism; Porin; Reference proteome; Transmembrane; Transmembrane beta strand; Transport; Ubl conjugation	Forms a channel through the mitochondrial outer membrane that allows diffusion of small hydrophilic molecules. The channel adopts an open conformation at low or zero membrane potential and a closed conformation at potentials above 30-40 mV. The open state has a weak anion selectivity whereas the closed state is cation-selective.	FALSE	31567	32
UTP4_HUMAN	TRUE	0.526726	1.44066	0.00369411	UTP4	NA	NA	3.53017	3.7658	0.00180191	0.12239	0.108611	2.35568	13	0.0186794	0.0890509	0.0782554	NA	NA	NA	NA	NA	NA	NA	NA	NA
UBR2_HUMAN	TRUE	0.221144	1.16566	0.0360936	UBR2	NA	NA	2.2469	2.33181	0.0291064	0.243106	0.219389	2.35568	20	0.0186794	0.0581212	0.0539651	NA	NA	NA	NA	NA	NA	NA	NA	NA
UBE4B_HUMAN	TRUE	0.0661255	1.0469	0.0218733	UBE4B	UBE4B HDNB1 KIAA0684 UFD2	Ubiquitin conjugation factor E4 B	2.48609	2.13312	0.0441307	0.194694	0.264284	2.35568	20	0.0186794	0.0042448	0.00576582	1302	cytoplasm [GO:0005737]; nucleus [GO:0005634]; ubiquitin ligase complex [GO:0000151]; ATP binding [GO:0005524]; ATPase binding [GO:0051117]; enzyme binding [GO:0019899]; ubiquitin-ubiquitin ligase activity [GO:0034450]; granzyme-mediated apoptotic signaling pathway [GO:0008626]; neuron projection development [GO:0031175]; proteasome-mediated ubiquitin-dependent protein catabolic process [GO:004316…	cytoplasm [GO:0005737]; nucleus [GO:0005634]; ubiquitin ligase complex [GO:0000151]; ATP binding [GO:0005524]; ATPase binding [GO:0051117]; enzyme binding [GO:0019899]; ubiquitin-ubiquitin ligase activity [GO:0034450]; granzyme-mediated apoptotic signaling pathway [GO:0008626]; neuron projection development [GO:0031175]; proteasome-mediated ubiquitin-dependent protein catabolic process [GO:004316…	cytoplasm [GO:0005737]; nucleus [GO:0005634]; ubiquitin ligase complex [GO:0000151]; ATP binding [GO:0005524]; ATPase binding [GO:0051117]; enzyme binding [GO:0019899]; ubiquitin-ubiquitin ligase activity [GO:0034450]; granzyme-mediated apoptotic signaling pathway [GO:0008626]; neuron projection development [GO:0031175]; proteasome-mediated ubiquitin-dependent protein catabolic process [GO:004316…	3D-structure; Acetylation; Alternative splicing; Complete proteome; Cytoplasm; Nucleus; Phosphoprotein; Polymorphism; Reference proteome; Transferase; Ubl conjugation pathway	Ubiquitin-protein ligase that probably functions as an E3 ligase in conjunction with specific E1 and E2 ligases. May also function as an E4 ligase mediating the assembly of polyubiquitin chains on substrates ubiquitinated by another E3 ubiquitin ligase. {ECO:0000250|UniProtKB:P54860, ECO:0000250|UniProtKB:Q9ES00}.	Protein modification; protein ubiquitination. {ECO:0000250|UniProtKB:Q9ES00}.	146185	146
UBE4A_HUMAN	TRUE	0.120549	1.08715	0.00195259	UBE4A	UBE4A KIAA0126	Ubiquitin conjugation factor E4 A	3.56215	3.27774	0.00338856	0.112467	0.113342	2.35568	20	0.0186794	0.00687153	0.00811576	1066	cytoplasm [GO:0005737]; nucleus [GO:0005634]; ubiquitin ligase complex [GO:0000151]; ubiquitin-ubiquitin ligase activity [GO:0034450]; protein polyubiquitination [GO:0000209]; ubiquitin-dependent ERAD pathway [GO:0030433]; ubiquitin-dependent protein catabolic process [GO:0006511]	cytoplasm [GO:0005737]; nucleus [GO:0005634]; ubiquitin ligase complex [GO:0000151]; ubiquitin-ubiquitin ligase activity [GO:0034450]; protein polyubiquitination [GO:0000209]; ubiquitin-dependent ERAD pathway [GO:0030433]; ubiquitin-dependent protein catabolic process [GO:0006511]	cytoplasm [GO:0005737]; nucleus [GO:0005634]; ubiquitin ligase complex [GO:0000151]; ubiquitin-ubiquitin ligase activity [GO:0034450]; protein polyubiquitination [GO:0000209]; ubiquitin-dependent ERAD pathway [GO:0030433]; ubiquitin-dependent protein catabolic process [GO:0006511]	3D-structure; Acetylation; Alternative splicing; Complete proteome; Cytoplasm; Direct protein sequencing; Reference proteome; Transferase; Ubl conjugation pathway	Ubiquitin-protein ligase that probably functions as an E3 ligase in conjunction with specific E1 and E2 ligases. May also function as an E4 ligase mediating the assembly of polyubiquitin chains on substrates ubiquitinated by another E3 ubiquitin ligase. Mediates 'Lys-48'-linked polyubiquitination of substrates. {ECO:0000250|UniProtKB:E9Q735, ECO:0000250|UniProtKB:P54860}.	Protein modification; protein ubiquitination. {ECO:0000250|UniProtKB:E9Q735}.	122561	123
TX264_HUMAN	TRUE	0.119171	1.08611	0.0190883	TEX264	TEX264 ZSIG11 UNQ337/PRO536	Testis-expressed protein 264	2.54972	2.49446	0.0204776	0.183709	0.18974	2.35568	20	0.0186794	0.0131072	0.0136943	313	extracellular exosome [GO:0070062]; extracellular region [GO:0005576]; platelet alpha granule lumen [GO:0031093]; platelet degranulation [GO:0002576]	extracellular exosome [GO:0070062]; extracellular region [GO:0005576]; platelet alpha granule lumen [GO:0031093]; platelet degranulation [GO:0002576]	extracellular exosome [GO:0070062]; extracellular region [GO:0005576]; platelet alpha granule lumen [GO:0031093]; platelet degranulation [GO:0002576]	Complete proteome; Glycoprotein; Phosphoprotein; Polymorphism; Reference proteome; Secreted; Signal		FALSE	34189	34
TTC27_HUMAN	TRUE	0.20452	1.1523	0.020802	TTC27	NA	NA	2.50961	2.58295	0.0168487	0.189541	0.175376	2.35568	20	0.0186794	0.0398482	0.0376176	NA	NA	NA	NA	NA	NA	NA	NA	NA
TSN_HUMAN	TRUE	0.12893	1.09348	0.0354153	TSN	TSN	Translin	2.25612	2.2617	0.0337707	0.24186	0.23306	2.35568	20	0.0186794	0.0195945	0.0194981	228	cytosol [GO:0005829]; nucleus [GO:0005634]; DNA binding [GO:0003677]; endonuclease activity [GO:0004519]; identical protein binding [GO:0042802]; mRNA binding [GO:0003729]; protein complex binding [GO:0032403]; sequence-specific DNA binding [GO:0043565]; single-stranded DNA binding [GO:0003697]; DNA recombination [GO:0006310]; gene silencing by RNA [GO:0031047]; RNA metabolic process [GO:0016070]	cytosol [GO:0005829]; nucleus [GO:0005634]; DNA binding [GO:0003677]; endonuclease activity [GO:0004519]; identical protein binding [GO:0042802]; mRNA binding [GO:0003729]; protein complex binding [GO:0032403]; sequence-specific DNA binding [GO:0043565]; single-stranded DNA binding [GO:0003697]; DNA recombination [GO:0006310]; gene silencing by RNA [GO:0031047]; RNA metabolic process [GO:0016070]	cytosol [GO:0005829]; nucleus [GO:0005634]; DNA binding [GO:0003677]; endonuclease activity [GO:0004519]; identical protein binding [GO:0042802]; mRNA binding [GO:0003729]; protein complex binding [GO:0032403]; sequence-specific DNA binding [GO:0043565]; single-stranded DNA binding [GO:0003697]; DNA recombination [GO:0006310]; gene silencing by RNA [GO:0031047]; RNA metabolic process [GO:0016070]	3D-structure; Acetylation; Alternative splicing; Complete proteome; Cytoplasm; DNA-binding; Endonuclease; Hydrolase; Nuclease; Nucleus; Phosphoprotein; RNA-binding; Reference proteome	DNA-binding protein that specifically recognizes consensus sequences at the breakpoint junctions in chromosomal translocations, mostly involving immunoglobulin (Ig)/T-cell receptor gene segments. Seems to recognize single-stranded DNA ends generated by staggered breaks occurring at recombination hot spots.; Exhibits both single-stranded and double-stranded endoribonuclease activity. May act as an…	FALSE	26183	26
TRUA_HUMAN	TRUE	0.144386	1.10526	0.0340311	PUS1	PUS1 PP8985	tRNA pseudouridine synthase A, mitochondrial	2.3685	2.32322	0.0342755	0.236432	0.233654	2.35568	13	0.0186794	0.0148651	0.0154502	427	mitochondrial matrix [GO:0005759]; mitochondrion [GO:0005739]; nucleus [GO:0005634]; pseudouridine synthase activity [GO:0009982]; pseudouridylate synthase activity [GO:0004730]; RNA binding [GO:0003723]; mitochondrial tRNA pseudouridine synthesis [GO:0070902]; mRNA pseudouridine synthesis [GO:1990481]; tRNA pseudouridine synthesis [GO:0031119]	mitochondrial matrix [GO:0005759]; mitochondrion [GO:0005739]; nucleus [GO:0005634]; pseudouridine synthase activity [GO:0009982]; pseudouridylate synthase activity [GO:0004730]; RNA binding [GO:0003723]; mitochondrial tRNA pseudouridine synthesis [GO:0070902]; mRNA pseudouridine synthesis [GO:1990481]; tRNA pseudouridine synthesis [GO:0031119]	mitochondrial matrix [GO:0005759]; mitochondrion [GO:0005739]; nucleus [GO:0005634]; pseudouridine synthase activity [GO:0009982]; pseudouridylate synthase activity [GO:0004730]; RNA binding [GO:0003723]; mitochondrial tRNA pseudouridine synthesis [GO:0070902]; mRNA pseudouridine synthesis [GO:1990481]; tRNA pseudouridine synthesis [GO:0031119]	3D-structure; Alternative splicing; Complete proteome; Disease mutation; Isomerase; Mitochondrion; Nucleus; Phosphoprotein; Polymorphism; Primary mitochondrial disease; Reference proteome; Transit peptide; tRNA processing	Converts specific uridines to PSI in a number of tRNA substrates. Acts on positions 27/28 in the anticodon stem and also positions 34 and 36 in the anticodon of an intron containing tRNA. Involved in regulation of nuclear receptor activity possibly through pseudouridylation of SRA1 RNA (By similarity). {ECO:0000250}.	FALSE	47470	47
TRI65_HUMAN	TRUE	0.272397	1.20781	0.0356722	TRIM65	NA	NA	2.69797	2.73041	0.0248152	0.242014	0.205748	2.35568	6	0.0186794	0.0203874	0.0199059	NA	NA	NA	NA	NA	NA	NA	NA	NA
TRABD_HUMAN	TRUE	0.176916	1.13047	0.0275355	TRABD	NA	NA	2.37723	2.43405	0.0233596	0.215884	0.201342	2.35568	20	0.0186794	0.0332312	0.0316978	NA	NA	NA	NA	NA	NA	NA	NA	NA
TPP1_HUMAN	TRUE	0.0616924	1.04369	0.0415996	TPP1	TPP1 CLN2 GIG1 UNQ267/PRO304	Tripeptidyl-peptidase 1	2.17737	1.90728	0.0694137	0.258857	0.315803	2.35568	20	0.0186794	0.00481671	0.00627746	563	extracellular exosome [GO:0070062]; lysosomal lumen [GO:0043202]; lysosome [GO:0005764]; melanosome [GO:0042470]; mitochondrion [GO:0005739]; endopeptidase activity [GO:0004175]; metal ion binding [GO:0046872]; peptidase activity [GO:0008233]; peptide binding [GO:0042277]; serine-type endopeptidase activity [GO:0004252]; serine-type peptidase activity [GO:0008236]; tripeptidyl-peptidase activity …	extracellular exosome [GO:0070062]; lysosomal lumen [GO:0043202]; lysosome [GO:0005764]; melanosome [GO:0042470]; mitochondrion [GO:0005739]; endopeptidase activity [GO:0004175]; metal ion binding [GO:0046872]; peptidase activity [GO:0008233]; peptide binding [GO:0042277]; serine-type endopeptidase activity [GO:0004252]; serine-type peptidase activity [GO:0008236]; tripeptidyl-peptidase activity …	extracellular exosome [GO:0070062]; lysosomal lumen [GO:0043202]; lysosome [GO:0005764]; melanosome [GO:0042470]; mitochondrion [GO:0005739]; endopeptidase activity [GO:0004175]; metal ion binding [GO:0046872]; peptidase activity [GO:0008233]; peptide binding [GO:0042277]; serine-type endopeptidase activity [GO:0004252]; serine-type peptidase activity [GO:0008236]; tripeptidyl-peptidase activity …	3D-structure; Alternative splicing; Autocatalytic cleavage; Calcium; Complete proteome; Direct protein sequencing; Disease mutation; Disulfide bond; Epilepsy; Glycoprotein; Hydrolase; Lysosome; Metal-binding; Neurodegeneration; Neuronal ceroid lipofuscinosis; Polymorphism; Protease; Reference proteome; Serine protease; Signal; Spinocerebellar ataxia; Zymogen	Lysosomal serine protease with tripeptidyl-peptidase I activity. May act as a non-specific lysosomal peptidase which generates tripeptides from the breakdown products produced by lysosomal proteinases. Requires substrates with an unsubstituted N-terminus (By similarity). {ECO:0000250|UniProtKB:Q9EQV6}.	FALSE	61248	61
TOM40_HUMAN	TRUE	0.105152	1.07561	0.00130636	TOMM40	TOMM40 C19orf1 PEREC1 TOM40	Mitochondrial import receptor subunit TOM40 homolog	3.73496	3.26511	0.00349198	0.110441	0.113342	2.35568	20	0.0186794	0.00475569	0.00622287	361	cytosol [GO:0005829]; extracellular exosome [GO:0070062]; integral component of membrane [GO:0016021]; integral component of mitochondrial outer membrane [GO:0031307]; mitochondrial inner membrane [GO:0005743]; mitochondrial outer membrane [GO:0005741]; mitochondrial outer membrane translocase complex [GO:0005742]; mitochondrion [GO:0005739]; pore complex [GO:0046930]; porin activity [GO:0015288]…	cytosol [GO:0005829]; extracellular exosome [GO:0070062]; integral component of membrane [GO:0016021]; integral component of mitochondrial outer membrane [GO:0031307]; mitochondrial inner membrane [GO:0005743]; mitochondrial outer membrane [GO:0005741]; mitochondrial outer membrane translocase complex [GO:0005742]; mitochondrion [GO:0005739]; pore complex [GO:0046930]; porin activity [GO:0015288]…	cytosol [GO:0005829]; extracellular exosome [GO:0070062]; integral component of membrane [GO:0016021]; integral component of mitochondrial outer membrane [GO:0031307]; mitochondrial inner membrane [GO:0005743]; mitochondrial outer membrane [GO:0005741]; mitochondrial outer membrane translocase complex [GO:0005742]; mitochondrion [GO:0005739]; pore complex [GO:0046930]; porin activity [GO:0015288]…	Alternative splicing; Complete proteome; Direct protein sequencing; Ion transport; Membrane; Mitochondrion; Mitochondrion outer membrane; Porin; Protein transport; Reference proteome; Transmembrane; Transmembrane beta strand; Transport	Channel-forming protein essential for import of protein precursors into mitochondria. {ECO:0000269|PubMed:15644312}.	FALSE	37893	38
TNIK_HUMAN	TRUE	0.255562	1.1938	0.0336188	TNIK	TNIK KIAA0551	TRAF2 and NCK-interacting protein kinase	2.74262	2.71383	0.0254739	0.235449	0.208691	2.35568	6	0.0186794	0.0173657	0.017736	1360	apical plasma membrane [GO:0016324]; cytoplasm [GO:0005737]; cytoskeleton [GO:0005856]; cytosol [GO:0005829]; extracellular exosome [GO:0070062]; nucleoplasm [GO:0005654]; nucleus [GO:0005634]; recycling endosome [GO:0055037]; ATP binding [GO:0005524]; protein kinase activity [GO:0004672]; protein serine/threonine kinase activity [GO:0004674]; signal transducer, downstream of receptor, with serin…	apical plasma membrane [GO:0016324]; cytoplasm [GO:0005737]; cytoskeleton [GO:0005856]; cytosol [GO:0005829]; extracellular exosome [GO:0070062]; nucleoplasm [GO:0005654]; nucleus [GO:0005634]; recycling endosome [GO:0055037]; ATP binding [GO:0005524]; protein kinase activity [GO:0004672]; protein serine/threonine kinase activity [GO:0004674]; signal transducer, downstream of receptor, with serin…	apical plasma membrane [GO:0016324]; cytoplasm [GO:0005737]; cytoskeleton [GO:0005856]; cytosol [GO:0005829]; extracellular exosome [GO:0070062]; nucleoplasm [GO:0005654]; nucleus [GO:0005634]; recycling endosome [GO:0055037]; ATP binding [GO:0005524]; protein kinase activity [GO:0004672]; protein serine/threonine kinase activity [GO:0004674]; signal transducer, downstream of receptor, with serin…	3D-structure; ATP-binding; Alternative splicing; Complete proteome; Cytoplasm; Cytoskeleton; Endosome; Kinase; Mental retardation; Neurogenesis; Nucleotide-binding; Nucleus; Phosphoprotein; Polymorphism; Reference proteome; Serine/threonine-protein kinase; Transferase; Wnt signaling pathway	Serine/threonine kinase that acts as an essential activator of the Wnt signaling pathway. Recruited to promoters of Wnt target genes and required to activate their expression. May act by phosphorylating TCF4/TCF7L2. Appears to act upstream of the JUN N-terminal pathway. May play a role in the response to environmental stress. Part of a signaling complex composed of NEDD4, RAP2A and TNIK which reg…	FALSE	154943	155
TMM65_HUMAN	TRUE	0.306405	1.23662	0.0418311	TMEM65	TMEM65	Transmembrane protein 65	2.17464	2.2782	0.0326154	0.259379	0.230593	2.35568	20	0.0186794	0.119116	0.108533	240	integral component of membrane [GO:0016021]; intercalated disc [GO:0014704]; mitochondrial inner membrane [GO:0005743]; plasma membrane [GO:0005886]; cardiac ventricle development [GO:0003231]; regulation of cardiac conduction [GO:1903779]	integral component of membrane [GO:0016021]; intercalated disc [GO:0014704]; mitochondrial inner membrane [GO:0005743]; plasma membrane [GO:0005886]; cardiac ventricle development [GO:0003231]; regulation of cardiac conduction [GO:1903779]	integral component of membrane [GO:0016021]; intercalated disc [GO:0014704]; mitochondrial inner membrane [GO:0005743]; plasma membrane [GO:0005886]; cardiac ventricle development [GO:0003231]; regulation of cardiac conduction [GO:1903779]	Cell membrane; Complete proteome; Membrane; Mitochondrion; Mitochondrion inner membrane; Polymorphism; Reference proteome; Transit peptide; Transmembrane; Transmembrane helix	May play an important role in cardiac development and function. May regulate cardiac conduction and the function of the gap junction protein GJA1. May contributes to the stability and proper localization of GJA1 to cardiac intercalated disk thereby regulating gap junction communication (By similarity). May also play a role in the regulation of mitochondrial respiration and mitochondrial DNA copy …	FALSE	25498	25
TMED1_HUMAN	TRUE	0.126782	1.09186	0.0274092	TMED1	TMED1 IL1RL1L IL1RL1LG	Transmembrane emp24 domain-containing protein 1	2.37942	2.3674	0.0269724	0.215727	0.213335	2.35568	20	0.0186794	0.0170343	0.0172076	227	endoplasmic reticulum [GO:0005783]; endoplasmic reticulum membrane [GO:0005789]; endoplasmic reticulum-Golgi intermediate compartment [GO:0005793]; endoplasmic reticulum-Golgi intermediate compartment membrane [GO:0033116]; Golgi apparatus [GO:0005794]; integral component of membrane [GO:0016021]; intracellular membrane-bounded organelle [GO:0043231]; plasma membrane [GO:0005886]; receptor bindin…	endoplasmic reticulum [GO:0005783]; endoplasmic reticulum membrane [GO:0005789]; endoplasmic reticulum-Golgi intermediate compartment [GO:0005793]; endoplasmic reticulum-Golgi intermediate compartment membrane [GO:0033116]; Golgi apparatus [GO:0005794]; integral component of membrane [GO:0016021]; intracellular membrane-bounded organelle [GO:0043231]; plasma membrane [GO:0005886]; receptor bindin…	endoplasmic reticulum [GO:0005783]; endoplasmic reticulum membrane [GO:0005789]; endoplasmic reticulum-Golgi intermediate compartment [GO:0005793]; endoplasmic reticulum-Golgi intermediate compartment membrane [GO:0033116]; Golgi apparatus [GO:0005794]; integral component of membrane [GO:0016021]; intracellular membrane-bounded organelle [GO:0043231]; plasma membrane [GO:0005886]; receptor bindin…	Cell membrane; Coiled coil; Complete proteome; Direct protein sequencing; Endoplasmic reticulum; Golgi apparatus; Membrane; Polymorphism; Protein transport; Reference proteome; Signal; Transmembrane; Transmembrane helix; Transport	Potential role in vesicular protein trafficking, mainly in the early secretory pathway. May act as a cargo receptor at the lumenal side for incorporation of secretory cargo molecules into transport vesicles and may be involved in vesicle coat formation at the cytoplasmic side.	FALSE	25206	25
TIM8A_HUMAN	TRUE	0.284653	1.21812	0.00208687	TIMM8A	TIMM8A DDP DDP1 TIM8A	Mitochondrial import inner membrane translocase subunit Tim8 A	3.53347	3.6345	0.001436	0.112743	0.108611	2.35568	20	0.0186794	0.0389386	0.0368038	97	mitochondrial inner membrane [GO:0005743]; mitochondrial intermembrane space [GO:0005758]; mitochondrion [GO:0005739]; metal ion binding [GO:0046872]; chaperone-mediated protein transport [GO:0072321]; nervous system development [GO:0007399]	mitochondrial inner membrane [GO:0005743]; mitochondrial intermembrane space [GO:0005758]; mitochondrion [GO:0005739]; metal ion binding [GO:0046872]; chaperone-mediated protein transport [GO:0072321]; nervous system development [GO:0007399]	mitochondrial inner membrane [GO:0005743]; mitochondrial intermembrane space [GO:0005758]; mitochondrion [GO:0005739]; metal ion binding [GO:0046872]; chaperone-mediated protein transport [GO:0072321]; nervous system development [GO:0007399]	Chaperone; Complete proteome; Deafness; Disease mutation; Disulfide bond; Dystonia; Membrane; Metal-binding; Mitochondrion; Mitochondrion inner membrane; Phosphoprotein; Protein transport; Reference proteome; Translocation; Transport; Zinc	Mitochondrial intermembrane chaperone that participates in the import and insertion of some multi-pass transmembrane proteins into the mitochondrial inner membrane. Also required for the transfer of beta-barrel precursors from the TOM complex to the sorting and assembly machinery (SAM complex) of the outer membrane. Acts as a chaperone-like protein that protects the hydrophobic precursors from ag…	FALSE	10998	11
TIM50_HUMAN	TRUE	0.190833	1.14142	0.00478283	TIMM50	TIMM50 TIM50 PRO1512	Mitochondrial import inner membrane translocase subunit TIM50	3.1729	3.19646	0.00410992	0.131017	0.115691	2.35568	20	0.0186794	0.0217042	0.0213854	353	integral component of membrane [GO:0016021]; mitochondrial inner membrane [GO:0005743]; mitochondrial inner membrane presequence translocase complex [GO:0005744]; mitochondrion [GO:0005739]; nuclear speck [GO:0016607]; nucleoplasm [GO:0005654]; interleukin-2 receptor binding [GO:0005134]; phosphoprotein phosphatase activity [GO:0004721]; protein serine/threonine phosphatase activity [GO:0004722];…	integral component of membrane [GO:0016021]; mitochondrial inner membrane [GO:0005743]; mitochondrial inner membrane presequence translocase complex [GO:0005744]; mitochondrion [GO:0005739]; nuclear speck [GO:0016607]; nucleoplasm [GO:0005654]; interleukin-2 receptor binding [GO:0005134]; phosphoprotein phosphatase activity [GO:0004721]; protein serine/threonine phosphatase activity [GO:0004722];…	integral component of membrane [GO:0016021]; mitochondrial inner membrane [GO:0005743]; mitochondrial inner membrane presequence translocase complex [GO:0005744]; mitochondrion [GO:0005739]; nuclear speck [GO:0016607]; nucleoplasm [GO:0005654]; interleukin-2 receptor binding [GO:0005134]; phosphoprotein phosphatase activity [GO:0004721]; protein serine/threonine phosphatase activity [GO:0004722];…	Alternative splicing; Complete proteome; Direct protein sequencing; Membrane; Mitochondrion; Mitochondrion inner membrane; Nucleus; Phosphoprotein; Polymorphism; Protein transport; RNA-binding; Reference proteome; Transit peptide; Translocation; Transmembrane; Transmembrane helix; Transport	Essential component of the TIM23 complex, a complex that mediates the translocation of transit peptide-containing proteins across the mitochondrial inner membrane. Has some phosphatase activity in vitro; however such activity may not be relevant in vivo. Isoform 2 may participate in the release of snRNPs and SMN from the Cajal body. {ECO:0000269|PubMed:15044455}.	FALSE	39646	40
TIDC1_HUMAN	TRUE	0.123193	1.08914	0.0187004	TIMMDC1	TIMMDC1 C3orf1 UNQ247/PRO284	Complex I assembly factor TIMMDC1, mitochondrial	2.55926	2.51415	0.0196118	0.183536	0.186018	2.35568	20	0.0186794	0.0139026	0.0144059	285	integral component of membrane [GO:0016021]; mitochondrial inner membrane [GO:0005743]; mitochondrion [GO:0005739]; nucleoplasm [GO:0005654]; nucleus [GO:0005634]; mitochondrial respiratory chain complex I assembly [GO:0032981]	integral component of membrane [GO:0016021]; mitochondrial inner membrane [GO:0005743]; mitochondrion [GO:0005739]; nucleoplasm [GO:0005654]; nucleus [GO:0005634]; mitochondrial respiratory chain complex I assembly [GO:0032981]	integral component of membrane [GO:0016021]; mitochondrial inner membrane [GO:0005743]; mitochondrion [GO:0005739]; nucleoplasm [GO:0005654]; nucleus [GO:0005634]; mitochondrial respiratory chain complex I assembly [GO:0032981]	Chaperone; Complete proteome; Membrane; Mitochondrion; Phosphoprotein; Polymorphism; Reference proteome; Transmembrane; Transmembrane helix	Chaperone protein involved in the assembly of the mitochondrial NADH:ubiquinone oxidoreductase complex (complex I). Participates in constructing the membrane arm of complex I. {ECO:0000269|PubMed:24191001}.	FALSE	32178	32
THG1_HUMAN	TRUE	0.509616	1.42367	0.0209919	THG1L	THG1L ICF45	Probable tRNA	3.10464	3.43731	0.00829427	0.189955	0.135373	2.35568	6	0.0186794	0.0538883	0.043962	298	cytosol [GO:0005829]; mitochondrion [GO:0005739]; ATP binding [GO:0005524]; GTP binding [GO:0005525]; identical protein binding [GO:0042802]; magnesium ion binding [GO:0000287]; nucleotidyltransferase activity [GO:0016779]; tRNA binding [GO:0000049]; tRNA guanylyltransferase activity [GO:0008193]; protein homotetramerization [GO:0051289]; tRNA modification [GO:0006400]; tRNA processing [GO:000803…	cytosol [GO:0005829]; mitochondrion [GO:0005739]; ATP binding [GO:0005524]; GTP binding [GO:0005525]; identical protein binding [GO:0042802]; magnesium ion binding [GO:0000287]; nucleotidyltransferase activity [GO:0016779]; tRNA binding [GO:0000049]; tRNA guanylyltransferase activity [GO:0008193]; protein homotetramerization [GO:0051289]; tRNA modification [GO:0006400]; tRNA processing [GO:000803…	cytosol [GO:0005829]; mitochondrion [GO:0005739]; ATP binding [GO:0005524]; GTP binding [GO:0005525]; identical protein binding [GO:0042802]; magnesium ion binding [GO:0000287]; nucleotidyltransferase activity [GO:0016779]; tRNA binding [GO:0000049]; tRNA guanylyltransferase activity [GO:0008193]; protein homotetramerization [GO:0051289]; tRNA modification [GO:0006400]; tRNA processing [GO:000803…	3D-structure; Complete proteome; Cytoplasm; GTP-binding; Magnesium; Metal-binding; Nucleotide-binding; Nucleotidyltransferase; Polymorphism; Reference proteome; Transferase; tRNA processing	Adds a GMP to the 5'-end of tRNA(His) after transcription and RNase P cleavage. This step is essential for proper recognition of the tRNA and for the fidelity of protein synthesis. {ECO:0000269|PubMed:21059936}.	FALSE	34831	35
THEM4_HUMAN	TRUE	0.233199	1.17544	0.00889219	THEM4	THEM4 CTMP	Acyl-coenzyme A thioesterase THEM4	2.89807	2.98076	0.00681802	0.142242	0.131675	2.35568	20	0.0186794	0.0388496	0.0367242	240	cytosol [GO:0005829]; mitochondrial inner membrane [GO:0005743]; mitochondrial intermembrane space [GO:0005758]; mitochondrial matrix [GO:0005759]; mitochondrion [GO:0005739]; plasma membrane [GO:0005886]; ruffle membrane [GO:0032587]; acyl-CoA hydrolase activity [GO:0047617]; myristoyl-CoA hydrolase activity [GO:0102991]; palmitoyl-CoA hydrolase activity [GO:0016290]; fatty acid metabolic proces…	cytosol [GO:0005829]; mitochondrial inner membrane [GO:0005743]; mitochondrial intermembrane space [GO:0005758]; mitochondrial matrix [GO:0005759]; mitochondrion [GO:0005739]; plasma membrane [GO:0005886]; ruffle membrane [GO:0032587]; acyl-CoA hydrolase activity [GO:0047617]; myristoyl-CoA hydrolase activity [GO:0102991]; palmitoyl-CoA hydrolase activity [GO:0016290]; fatty acid metabolic proces…	cytosol [GO:0005829]; mitochondrial inner membrane [GO:0005743]; mitochondrial intermembrane space [GO:0005758]; mitochondrial matrix [GO:0005759]; mitochondrion [GO:0005739]; plasma membrane [GO:0005886]; ruffle membrane [GO:0032587]; acyl-CoA hydrolase activity [GO:0047617]; myristoyl-CoA hydrolase activity [GO:0102991]; palmitoyl-CoA hydrolase activity [GO:0016290]; fatty acid metabolic proces…	3D-structure; Acetylation; Apoptosis; Cell membrane; Cell projection; Complete proteome; Cytoplasm; Fatty acid metabolism; Hydrolase; Lipid metabolism; Membrane; Mitochondrion; Mitochondrion inner membrane; Phosphoprotein; Polymorphism; Reference proteome; Transit peptide	Has acyl-CoA thioesterase activity towards medium and long-chain (C14 to C18) fatty acyl-CoA substrates, and probably plays an role in mitochondrial fatty acid metabolism. Plays a role in the apoptotic process, possibly via its regulation of AKT1 activity. According to PubMed:11598301, inhibits AKT1 phosphorylation and activity. According to PubMed:17615157, enhances AKT1 activity by favoring its…	FALSE	27130	27
TFR1_HUMAN	TRUE	0.233979	1.17607	0.0242728	TFRC	TFRC	Transferrin receptor protein 1	2.43708	2.52684	0.0190725	0.205696	0.183803	2.35568	20	0.0186794	0.0553053	0.0514459	760	basolateral plasma membrane [GO:0016323]; blood microparticle [GO:0072562]; cell surface [GO:0009986]; clathrin-coated pit [GO:0005905]; clathrin-coated vesicle membrane [GO:0030665]; cytoplasmic vesicle [GO:0031410]; endosome [GO:0005768]; endosome membrane [GO:0010008]; external side of plasma membrane [GO:0009897]; extracellular exosome [GO:0070062]; extracellular region [GO:0005576]; extracel…	basolateral plasma membrane [GO:0016323]; blood microparticle [GO:0072562]; cell surface [GO:0009986]; clathrin-coated pit [GO:0005905]; clathrin-coated vesicle membrane [GO:0030665]; cytoplasmic vesicle [GO:0031410]; endosome [GO:0005768]; endosome membrane [GO:0010008]; external side of plasma membrane [GO:0009897]; extracellular exosome [GO:0070062]; extracellular region [GO:0005576]; extracel…	basolateral plasma membrane [GO:0016323]; blood microparticle [GO:0072562]; cell surface [GO:0009986]; clathrin-coated pit [GO:0005905]; clathrin-coated vesicle membrane [GO:0030665]; cytoplasmic vesicle [GO:0031410]; endosome [GO:0005768]; endosome membrane [GO:0010008]; external side of plasma membrane [GO:0009897]; extracellular exosome [GO:0070062]; extracellular region [GO:0005576]; extracel…	3D-structure; Cell membrane; Complete proteome; Direct protein sequencing; Disease mutation; Disulfide bond; Endocytosis; Glycoprotein; Host cell receptor for virus entry; Host-virus interaction; Lipoprotein; Membrane; Palmitate; Phosphoprotein; Polymorphism; Receptor; Reference proteome; Secreted; Signal-anchor; Transmembrane; Transmembrane helix	Cellular uptake of iron occurs via receptor-mediated endocytosis of ligand-occupied transferrin receptor into specialized endosomes. Endosomal acidification leads to iron release. The apotransferrin-receptor complex is then recycled to the cell surface with a return to neutral pH and the concomitant loss of affinity of apotransferrin for its receptor. Transferrin receptor is necessary for develop…	FALSE	84871	85
TF3C6_HUMAN	TRUE	0.333586	1.26014	0.010998	GTF3C6	NA	NA	3.6275	3.57526	0.00674009	0.154079	0.131675	2.35568	6	0.0186794	0.0169134	0.0174112	NA	NA	NA	NA	NA	NA	NA	NA	NA
TACO1_HUMAN	TRUE	0.217351	1.1626	0.0202869	TACO1	TACO1 CCDC44 PRO0477	Translational activator of cytochrome c oxidase 1	2.52133	2.60225	0.0161413	0.187752	0.171659	2.35568	20	0.0186794	0.0445878	0.0418578	297	mitochondrion [GO:0005739]; nucleus [GO:0005634]; regulation of translation [GO:0006417]	mitochondrion [GO:0005739]; nucleus [GO:0005634]; regulation of translation [GO:0006417]	mitochondrion [GO:0005739]; nucleus [GO:0005634]; regulation of translation [GO:0006417]	Activator; Coiled coil; Complete proteome; Leigh syndrome; Mitochondrion; Polymorphism; Primary mitochondrial disease; Reference proteome; Translation regulation	Acts as a translational activator of mitochondrially-encoded cytochrome c oxidase 1. {ECO:0000269|PubMed:19503089}.	FALSE	32477	32
SYWM_HUMAN	TRUE	0.137944	1.10034	0.0304906	WARS2	WARS2	Tryptophan--tRNA ligase, mitochondrial	2.32846	2.34244	0.0284536	0.225664	0.218931	2.35568	20	0.0186794	0.021058	0.0208074	360	mitochondrial matrix [GO:0005759]; mitochondrion [GO:0005739]; plasma membrane [GO:0005886]; ATP binding [GO:0005524]; tryptophan-tRNA ligase activity [GO:0004830]; tRNA aminoacylation for protein translation [GO:0006418]; tryptophanyl-tRNA aminoacylation [GO:0006436]; vasculogenesis [GO:0001570]	mitochondrial matrix [GO:0005759]; mitochondrion [GO:0005739]; plasma membrane [GO:0005886]; ATP binding [GO:0005524]; tryptophan-tRNA ligase activity [GO:0004830]; tRNA aminoacylation for protein translation [GO:0006418]; tryptophanyl-tRNA aminoacylation [GO:0006436]; vasculogenesis [GO:0001570]	mitochondrial matrix [GO:0005759]; mitochondrion [GO:0005739]; plasma membrane [GO:0005886]; ATP binding [GO:0005524]; tryptophan-tRNA ligase activity [GO:0004830]; tRNA aminoacylation for protein translation [GO:0006418]; tryptophanyl-tRNA aminoacylation [GO:0006436]; vasculogenesis [GO:0001570]	3D-structure; ATP-binding; Alternative splicing; Aminoacyl-tRNA synthetase; Complete proteome; Disease mutation; Ligase; Mitochondrion; Nucleotide-binding; Polymorphism; Protein biosynthesis; Reference proteome; Transit peptide		FALSE	40147	40
SYSM_HUMAN	TRUE	0.102045	1.07329	0.0467864	SARS2	SARS2 SARSM	Serine--tRNA ligase, mitochondrial	2.11916	2.08191	0.0489998	0.271815	0.274664	2.35568	20	0.0186794	0.0139126	0.0144149	518	cytoplasm [GO:0005737]; mitochondrial matrix [GO:0005759]; mitochondrion [GO:0005739]; ATP binding [GO:0005524]; RNA binding [GO:0003723]; serine-tRNA ligase activity [GO:0004828]; selenocysteinyl-tRNA(Sec) biosynthetic process [GO:0097056]; seryl-tRNA aminoacylation [GO:0006434]; tRNA aminoacylation for protein translation [GO:0006418]	cytoplasm [GO:0005737]; mitochondrial matrix [GO:0005759]; mitochondrion [GO:0005739]; ATP binding [GO:0005524]; RNA binding [GO:0003723]; serine-tRNA ligase activity [GO:0004828]; selenocysteinyl-tRNA(Sec) biosynthetic process [GO:0097056]; seryl-tRNA aminoacylation [GO:0006434]; tRNA aminoacylation for protein translation [GO:0006418]	cytoplasm [GO:0005737]; mitochondrial matrix [GO:0005759]; mitochondrion [GO:0005739]; ATP binding [GO:0005524]; RNA binding [GO:0003723]; serine-tRNA ligase activity [GO:0004828]; selenocysteinyl-tRNA(Sec) biosynthetic process [GO:0097056]; seryl-tRNA aminoacylation [GO:0006434]; tRNA aminoacylation for protein translation [GO:0006418]	ATP-binding; Acetylation; Alternative splicing; Aminoacyl-tRNA synthetase; Complete proteome; Ligase; Mitochondrion; Nucleotide-binding; Polymorphism; Protein biosynthesis; Reference proteome; Transit peptide	Catalyzes the attachment of serine to tRNA(Ser). Is also able to aminoacylate tRNA(Sec) with serine, to form the misacylated tRNA L-seryl-tRNA(Sec), which will be further converted into selenocysteinyl-tRNA(Sec) (By similarity). {ECO:0000250}.	Aminoacyl-tRNA biosynthesis; selenocysteinyl-tRNA(Sec) biosynthesis; L-seryl-tRNA(Sec) from L-serine and tRNA(Sec): step 1/1.	58283	58
SYNM_HUMAN	TRUE	0.10657	1.07667	0.0482393	NARS2	NARS2	Probable asparagine--tRNA ligase, mitochondrial	2.1039	2.08064	0.0491263	0.274928	0.274664	2.35568	20	0.0186794	0.0153946	0.0157407	477	cytosol [GO:0005829]; mitochondrial matrix [GO:0005759]; mitochondrion [GO:0005739]; nucleoplasm [GO:0005654]; asparagine-tRNA ligase activity [GO:0004816]; ATP binding [GO:0005524]; nucleic acid binding [GO:0003676]; asparaginyl-tRNA aminoacylation [GO:0006421]	cytosol [GO:0005829]; mitochondrial matrix [GO:0005759]; mitochondrion [GO:0005739]; nucleoplasm [GO:0005654]; asparagine-tRNA ligase activity [GO:0004816]; ATP binding [GO:0005524]; nucleic acid binding [GO:0003676]; asparaginyl-tRNA aminoacylation [GO:0006421]	cytosol [GO:0005829]; mitochondrial matrix [GO:0005759]; mitochondrion [GO:0005739]; nucleoplasm [GO:0005654]; asparagine-tRNA ligase activity [GO:0004816]; ATP binding [GO:0005524]; nucleic acid binding [GO:0003676]; asparaginyl-tRNA aminoacylation [GO:0006421]	ATP-binding; Acetylation; Alternative splicing; Aminoacyl-tRNA synthetase; Complete proteome; Deafness; Disease mutation; Leigh syndrome; Ligase; Mitochondrion; Non-syndromic deafness; Nucleotide-binding; Polymorphism; Primary mitochondrial disease; Protein biosynthesis; Reference proteome; Transit peptide		FALSE	54090	54
SYJ2B_HUMAN	TRUE	0.0927995	1.06644	0.00628311	SYNJ2BP	SYNJ2BP OMP25	Synaptojanin-2-binding protein	3.05268	2.73083	0.0120969	0.137538	0.155949	2.35568	20	0.0186794	0.00554471	0.00692875	145	integral component of mitochondrial outer membrane [GO:0031307]; mitochondrion [GO:0005739]; protein C-terminus binding [GO:0008022]; intracellular distribution of mitochondria [GO:0048312]; negative regulation of angiogenesis [GO:0016525]; negative regulation of endothelial cell migration [GO:0010596]; negative regulation of endothelial cell proliferation [GO:0001937]; negative regulation of ERK…	integral component of mitochondrial outer membrane [GO:0031307]; mitochondrion [GO:0005739]; protein C-terminus binding [GO:0008022]; intracellular distribution of mitochondria [GO:0048312]; negative regulation of angiogenesis [GO:0016525]; negative regulation of endothelial cell migration [GO:0010596]; negative regulation of endothelial cell proliferation [GO:0001937]; negative regulation of ERK…	integral component of mitochondrial outer membrane [GO:0031307]; mitochondrion [GO:0005739]; protein C-terminus binding [GO:0008022]; intracellular distribution of mitochondria [GO:0048312]; negative regulation of angiogenesis [GO:0016525]; negative regulation of endothelial cell migration [GO:0010596]; negative regulation of endothelial cell proliferation [GO:0001937]; negative regulation of ERK…	3D-structure; Complete proteome; Membrane; Mitochondrion; Mitochondrion outer membrane; Polymorphism; Reference proteome; Transmembrane; Transmembrane helix	Regulates endocytosis of activin type 2 receptor kinases through the Ral/RALBP1-dependent pathway and may be involved in suppression of activin-induced signal transduction. {ECO:0000250|UniProtKB:Q9D6K5}.	FALSE	15928	16
SYHM_HUMAN	TRUE	0.121753	1.08806	0.00492359	HARS2	HARS2 HARSL HARSR HO3	Probable histidine--tRNA ligase, mitochondrial	3.16017	2.99192	0.00664329	0.131925	0.131675	2.35568	20	0.0186794	0.00890623	0.00993605	506	mitochondrial matrix [GO:0005759]; mitochondrion [GO:0005739]; ATP binding [GO:0005524]; histidine-tRNA ligase activity [GO:0004821]; protein homodimerization activity [GO:0042803]; RNA binding [GO:0003723]; histidyl-tRNA aminoacylation [GO:0006427]; translation [GO:0006412]; tRNA aminoacylation for protein translation [GO:0006418]	mitochondrial matrix [GO:0005759]; mitochondrion [GO:0005739]; ATP binding [GO:0005524]; histidine-tRNA ligase activity [GO:0004821]; protein homodimerization activity [GO:0042803]; RNA binding [GO:0003723]; histidyl-tRNA aminoacylation [GO:0006427]; translation [GO:0006412]; tRNA aminoacylation for protein translation [GO:0006418]	mitochondrial matrix [GO:0005759]; mitochondrion [GO:0005739]; ATP binding [GO:0005524]; histidine-tRNA ligase activity [GO:0004821]; protein homodimerization activity [GO:0042803]; RNA binding [GO:0003723]; histidyl-tRNA aminoacylation [GO:0006427]; translation [GO:0006412]; tRNA aminoacylation for protein translation [GO:0006418]	ATP-binding; Acetylation; Alternative splicing; Aminoacyl-tRNA synthetase; Complete proteome; Deafness; Disease mutation; Ligase; Mitochondrion; Nucleotide-binding; Phosphoprotein; Protein biosynthesis; Reference proteome; Transit peptide		FALSE	56888	57
SYHC_HUMAN	TRUE	0.0554208	1.03916	0.0406246	HARS	NA	NA	2.18904	1.84584	0.0782	0.256561	0.328814	2.35568	20	0.0186794	0.00384581	0.00540886	NA	NA	NA	NA	NA	NA	NA	NA	NA
SYEM_HUMAN	TRUE	0.205845	1.15336	0.0199089	EARS2	EARS2 KIAA1970	Probable glutamate--tRNA ligase, mitochondrial	2.53011	2.60381	0.0160854	0.187013	0.171515	2.35568	20	0.0186794	0.0397148	0.0374983	523	mitochondrial matrix [GO:0005759]; mitochondrion [GO:0005739]; ATP binding [GO:0005524]; glutamate-tRNA ligase activity [GO:0004818]; glutamate-tRNA(Gln) ligase activity [GO:0050561]; tRNA binding [GO:0000049]; zinc ion binding [GO:0008270]; glutamyl-tRNA aminoacylation [GO:0006424]; tRNA aminoacylation for mitochondrial protein translation [GO:0070127]	mitochondrial matrix [GO:0005759]; mitochondrion [GO:0005739]; ATP binding [GO:0005524]; glutamate-tRNA ligase activity [GO:0004818]; glutamate-tRNA(Gln) ligase activity [GO:0050561]; tRNA binding [GO:0000049]; zinc ion binding [GO:0008270]; glutamyl-tRNA aminoacylation [GO:0006424]; tRNA aminoacylation for mitochondrial protein translation [GO:0070127]	mitochondrial matrix [GO:0005759]; mitochondrion [GO:0005739]; ATP binding [GO:0005524]; glutamate-tRNA ligase activity [GO:0004818]; glutamate-tRNA(Gln) ligase activity [GO:0050561]; tRNA binding [GO:0000049]; zinc ion binding [GO:0008270]; glutamyl-tRNA aminoacylation [GO:0006424]; tRNA aminoacylation for mitochondrial protein translation [GO:0070127]	ATP-binding; Acetylation; Alternative splicing; Aminoacyl-tRNA synthetase; Complete proteome; Disease mutation; Ligase; Mitochondrion; Nucleotide-binding; Polymorphism; Primary mitochondrial disease; Protein biosynthesis; RNA-binding; Reference proteome; Transit peptide	Catalyzes the attachment of glutamate to tRNA(Glu) in a two-step reaction: glutamate is first activated by ATP to form Glu-AMP and then transferred to the acceptor end of tRNA(Glu). {ECO:0000250}.	FALSE	58689	59
SUCHY_HUMAN	TRUE	0.225976	1.16957	0.00535774	SUGCT	SUGCT C7orf10 DERP13	Succinate--hydroxymethylglutarate CoA-transferase	3.123	3.19192	0.00415428	0.131969	0.115691	2.35568	20	0.0186794	0.0314146	0.0300726	445	mitochondrion [GO:0005739]; succinate-hydroxymethylglutarate CoA-transferase activity [GO:0047369]	mitochondrion [GO:0005739]; succinate-hydroxymethylglutarate CoA-transferase activity [GO:0047369]	mitochondrion [GO:0005739]; succinate-hydroxymethylglutarate CoA-transferase activity [GO:0047369]	Acetylation; Alternative splicing; Complete proteome; Disease mutation; Glutaricaciduria; Mitochondrion; Reference proteome; Transferase; Transit peptide	Catalyzes the succinyl-CoA-dependent conversion of glutarate to glutaryl-CoA. Can use different dicarboxylic acids as CoA acceptors, the preferred ones are glutarate, succinate, adipate, and 3-hydroxymethylglutarate. {ECO:0000269|PubMed:23893049}.	FALSE	48462	48
SUCB2_HUMAN	TRUE	0.320839	1.24906	0.00507444	SUCLG2	SUCLG2	Succinate--CoA ligase [GDP-forming] subunit beta, mitochondrial	3.14691	3.2699	0.0034524	0.131969	0.113342	2.35568	20	0.0186794	0.0623675	0.057764	432	mitochondrial matrix [GO:0005759]; mitochondrion [GO:0005739]; plasma membrane [GO:0005886]; succinate-CoA ligase complex (GDP-forming) [GO:0045244]; ATP binding [GO:0005524]; GDP binding [GO:0019003]; GTP binding [GO:0005525]; metal ion binding [GO:0046872]; protein heterodimerization activity [GO:0046982]; succinate-CoA ligase (GDP-forming) activity [GO:0004776]; succinate metabolic process [GO…	mitochondrial matrix [GO:0005759]; mitochondrion [GO:0005739]; plasma membrane [GO:0005886]; succinate-CoA ligase complex (GDP-forming) [GO:0045244]; ATP binding [GO:0005524]; GDP binding [GO:0019003]; GTP binding [GO:0005525]; metal ion binding [GO:0046872]; protein heterodimerization activity [GO:0046982]; succinate-CoA ligase (GDP-forming) activity [GO:0004776]; succinate metabolic process [GO…	mitochondrial matrix [GO:0005759]; mitochondrion [GO:0005739]; plasma membrane [GO:0005886]; succinate-CoA ligase complex (GDP-forming) [GO:0045244]; ATP binding [GO:0005524]; GDP binding [GO:0019003]; GTP binding [GO:0005525]; metal ion binding [GO:0046872]; protein heterodimerization activity [GO:0046982]; succinate-CoA ligase (GDP-forming) activity [GO:0004776]; succinate metabolic process [GO…	Acetylation; Alternative splicing; Complete proteome; GTP-binding; Ligase; Magnesium; Metal-binding; Mitochondrion; Nucleotide-binding; Phosphoprotein; Polymorphism; Reference proteome; Transit peptide; Tricarboxylic acid cycle	GTP-specific succinyl-CoA synthetase functions in the citric acid cycle (TCA), coupling the hydrolysis of succinyl-CoA to the synthesis of GTP and thus represents the only step of substrate-level phosphorylation in the TCA. The beta subunit provides nucleotide specificity of the enzyme and binds the substrate succinate, while the binding sites for coenzyme A and phosphate are found in the alpha s…	Carbohydrate metabolism; tricarboxylic acid cycle; succinate from succinyl-CoA (ligase route): step 1/1. {ECO:0000255|HAMAP-Rule:MF_03221}.	46511	47
SSDH_HUMAN	TRUE	0.149278	1.10901	0.0180526	ALDH5A1	ALDH5A1 SSADH	Succinate-semialdehyde dehydrogenase, mitochondrial	2.57563	2.58562	0.0167491	0.181764	0.175249	2.35568	20	0.0186794	0.0201547	0.0199992	535	mitochondrial matrix [GO:0005759]; mitochondrion [GO:0005739]; protein homodimerization activity [GO:0042803]; succinate-semialdehyde dehydrogenase (NAD+) activity [GO:0004777]; succinate-semialdehyde dehydrogenase [NAD(P)+] activity [GO:0009013]; acetate metabolic process [GO:0006083]; central nervous system development [GO:0007417]; galactosylceramide metabolic process [GO:0006681]; gamma-amino…	mitochondrial matrix [GO:0005759]; mitochondrion [GO:0005739]; protein homodimerization activity [GO:0042803]; succinate-semialdehyde dehydrogenase (NAD+) activity [GO:0004777]; succinate-semialdehyde dehydrogenase [NAD(P)+] activity [GO:0009013]; acetate metabolic process [GO:0006083]; central nervous system development [GO:0007417]; galactosylceramide metabolic process [GO:0006681]; gamma-amino…	mitochondrial matrix [GO:0005759]; mitochondrion [GO:0005739]; protein homodimerization activity [GO:0042803]; succinate-semialdehyde dehydrogenase (NAD+) activity [GO:0004777]; succinate-semialdehyde dehydrogenase [NAD(P)+] activity [GO:0009013]; acetate metabolic process [GO:0006083]; central nervous system development [GO:0007417]; galactosylceramide metabolic process [GO:0006681]; gamma-amino…	3D-structure; Acetylation; Alternative splicing; Complete proteome; Disease mutation; Disulfide bond; Mitochondrion; NAD; Oxidoreductase; Phosphoprotein; Polymorphism; Reference proteome; Transit peptide	Catalyzes one step in the degradation of the inhibitory neurotransmitter gamma-aminobutyric acid (GABA). {ECO:0000269|PubMed:19300440}.	Amino-acid degradation; 4-aminobutanoate degradation.	57215	57
SRPRA_HUMAN	TRUE	0.0981256	1.07038	0.0206798	SRPRA	SRPRA SRPR	Signal recognition particle receptor subunit alpha	2.51236	2.38498	0.0259728	0.188829	0.208864	2.35568	20	0.0186794	0.00915274	0.0101566	638	endoplasmic reticulum [GO:0005783]; endoplasmic reticulum membrane [GO:0005789]; extracellular exosome [GO:0070062]; integral component of membrane [GO:0016021]; membrane [GO:0016020]; signal recognition particle receptor complex [GO:0005785]; GTP binding [GO:0005525]; GTPase activity [GO:0003924]; RNA binding [GO:0003723]; signal recognition particle binding [GO:0005047]; cotranslational protein…	endoplasmic reticulum [GO:0005783]; endoplasmic reticulum membrane [GO:0005789]; extracellular exosome [GO:0070062]; integral component of membrane [GO:0016021]; membrane [GO:0016020]; signal recognition particle receptor complex [GO:0005785]; GTP binding [GO:0005525]; GTPase activity [GO:0003924]; RNA binding [GO:0003723]; signal recognition particle binding [GO:0005047]; cotranslational protein…	endoplasmic reticulum [GO:0005783]; endoplasmic reticulum membrane [GO:0005789]; extracellular exosome [GO:0070062]; integral component of membrane [GO:0016021]; membrane [GO:0016020]; signal recognition particle receptor complex [GO:0005785]; GTP binding [GO:0005525]; GTPase activity [GO:0003924]; RNA binding [GO:0003723]; signal recognition particle binding [GO:0005047]; cotranslational protein…	3D-structure; Alternative splicing; Complete proteome; Endoplasmic reticulum; GTP-binding; Membrane; Nucleotide-binding; Phosphoprotein; Receptor; Reference proteome	Component of the SRP (signal recognition particle) receptor. Ensures, in conjunction with the signal recognition particle, the correct targeting of the nascent secretory proteins to the endoplasmic reticulum membrane system.	FALSE	69811	70
SQOR_HUMAN	TRUE	0.126542	1.09167	0.0260485	SQOR	NA	NA	2.40364	2.38818	0.0257943	0.213232	0.208864	2.35568	20	0.0186794	0.0166296	0.0168456	NA	NA	NA	NA	NA	NA	NA	NA	NA
SPRY4_HUMAN	TRUE	0.165937	1.12189	0.0244577	SPRYD4	SPRYD4	SPRY domain-containing protein 4	2.43349	2.477	0.0212747	0.205705	0.19341	2.35568	20	0.0186794	0.0278982	0.0269268	207	mitochondrion [GO:0005739]; nucleus [GO:0005634]	mitochondrion [GO:0005739]; nucleus [GO:0005634]	mitochondrion [GO:0005739]; nucleus [GO:0005634]	Acetylation; Complete proteome; Polymorphism; Reference proteome		FALSE	23129	23
SNP23_HUMAN	TRUE	0.121789	1.08808	0.0247579	SNAP23	SNAP23	Synaptosomal-associated protein 23	2.42772	2.39795	0.0252566	0.207163	0.207618	2.35568	20	0.0186794	0.0150996	0.0154769	211	azurophil granule [GO:0042582]; cell-cell adherens junction [GO:0005913]; cytoplasm [GO:0005737]; extracellular exosome [GO:0070062]; focal adhesion [GO:0005925]; mast cell granule [GO:0042629]; neuron projection [GO:0043005]; nucleoplasm [GO:0005654]; phagocytic vesicle membrane [GO:0030670]; plasma membrane [GO:0005886]; presynapse [GO:0098793]; SNARE complex [GO:0031201]; specific granule [GO:…	azurophil granule [GO:0042582]; cell-cell adherens junction [GO:0005913]; cytoplasm [GO:0005737]; extracellular exosome [GO:0070062]; focal adhesion [GO:0005925]; mast cell granule [GO:0042629]; neuron projection [GO:0043005]; nucleoplasm [GO:0005654]; phagocytic vesicle membrane [GO:0030670]; plasma membrane [GO:0005886]; presynapse [GO:0098793]; SNARE complex [GO:0031201]; specific granule [GO:…	azurophil granule [GO:0042582]; cell-cell adherens junction [GO:0005913]; cytoplasm [GO:0005737]; extracellular exosome [GO:0070062]; focal adhesion [GO:0005925]; mast cell granule [GO:0042629]; neuron projection [GO:0043005]; nucleoplasm [GO:0005654]; phagocytic vesicle membrane [GO:0030670]; plasma membrane [GO:0005886]; presynapse [GO:0098793]; SNARE complex [GO:0031201]; specific granule [GO:…	3D-structure; Acetylation; Alternative splicing; Cell junction; Cell membrane; Coiled coil; Complete proteome; Direct protein sequencing; Lipoprotein; Membrane; Palmitate; Phosphoprotein; Protein transport; Reference proteome; Repeat; Synapse; Synaptosome; Transport	Essential component of the high affinity receptor for the general membrane fusion machinery and an important regulator of transport vesicle docking and fusion.	FALSE	23354	23
SHAN3_HUMAN	TRUE	0.18173	1.13424	0.0243308	SHANK3	NA	NA	2.54699	2.5633	0.0213279	0.205696	0.193516	2.35568	13	0.0186794	0.0203638	0.0201054	NA	NA	NA	NA	NA	NA	NA	NA	NA
SFXN4_HUMAN	TRUE	0.241024	1.18183	0.00095862	SFXN4	SFXN4 BCRM1	Sideroflexin-4	3.86761	3.90868	0.000735651	0.110441	0.105421	2.35568	20	0.0186794	0.0233016	0.0228145	337	integral component of membrane [GO:0016021]; mitochondrial inner membrane [GO:0005743]; ion transmembrane transporter activity [GO:0015075]; iron ion homeostasis [GO:0055072]	integral component of membrane [GO:0016021]; mitochondrial inner membrane [GO:0005743]; ion transmembrane transporter activity [GO:0015075]; iron ion homeostasis [GO:0055072]	integral component of membrane [GO:0016021]; mitochondrial inner membrane [GO:0005743]; ion transmembrane transporter activity [GO:0015075]; iron ion homeostasis [GO:0055072]	Acetylation; Alternative splicing; Complete proteome; Ion transport; Iron; Iron transport; Membrane; Mitochondrion; Mitochondrion inner membrane; Primary mitochondrial disease; Reference proteome; Transmembrane; Transmembrane helix; Transport	Potential iron transporter. {ECO:0000250}.	FALSE	37998	38
SFRP3_HUMAN	TRUE	0.685467	1.60822	0.000150452	FRZB	NA	NA	5.2741	5.59367	4.7e-05	0.0922155	0.0508859	2.35568	13	0.0186794	0.0675672	0.0600674	NA	NA	NA	NA	NA	NA	NA	NA	NA
SETX_HUMAN	TRUE	0.681923	1.60428	0.0123515	SETX	NA	NA	3.53109	3.97612	0.00374158	0.158131	0.113526	2.35568	6	0.0186794	0.0745907	0.0588279	NA	NA	NA	NA	NA	NA	NA	NA	NA
SCPDL_HUMAN	TRUE	0.106891	1.07691	0.0132534	SCCPDH	SCCPDH CGI-49	Saccharopine dehydrogenase-like oxidoreductase	2.71772	2.5834	0.0168316	0.163073	0.175376	2.35568	20	0.0186794	0.00928168	0.0102719	429	extracellular region [GO:0005576]; lipid particle [GO:0005811]; membrane [GO:0016020]; midbody [GO:0030496]; mitochondrion [GO:0005739]; nucleus [GO:0005634]; platelet alpha granule lumen [GO:0031093]; oxidoreductase activity [GO:0016491]; platelet degranulation [GO:0002576]	extracellular region [GO:0005576]; lipid particle [GO:0005811]; membrane [GO:0016020]; midbody [GO:0030496]; mitochondrion [GO:0005739]; nucleus [GO:0005634]; platelet alpha granule lumen [GO:0031093]; oxidoreductase activity [GO:0016491]; platelet degranulation [GO:0002576]	extracellular region [GO:0005576]; lipid particle [GO:0005811]; membrane [GO:0016020]; midbody [GO:0030496]; mitochondrion [GO:0005739]; nucleus [GO:0005634]; platelet alpha granule lumen [GO:0031093]; oxidoreductase activity [GO:0016491]; platelet degranulation [GO:0002576]	Acetylation; Complete proteome; Direct protein sequencing; Oxidoreductase; Phosphoprotein; Polymorphism; Reference proteome		FALSE	47151	47
SCOT1_HUMAN	TRUE	0.30082	1.23184	0.0148249	OXCT1	OXCT1 OXCT SCOT	Succinyl-CoA:3-ketoacid coenzyme A transferase 1	2.66647	2.77938	0.0108353	0.169052	0.150594	2.35568	20	0.0186794	0.0763645	0.0702861	520	mitochondrial matrix [GO:0005759]; mitochondrion [GO:0005739]; nucleoplasm [GO:0005654]; 3-oxoacid CoA-transferase activity [GO:0008260]; protein homodimerization activity [GO:0042803]; adipose tissue development [GO:0060612]; brain development [GO:0007420]; cellular ketone body metabolic process [GO:0046950]; heart development [GO:0007507]; ketone body catabolic process [GO:0046952]; ketone cata…	mitochondrial matrix [GO:0005759]; mitochondrion [GO:0005739]; nucleoplasm [GO:0005654]; 3-oxoacid CoA-transferase activity [GO:0008260]; protein homodimerization activity [GO:0042803]; adipose tissue development [GO:0060612]; brain development [GO:0007420]; cellular ketone body metabolic process [GO:0046950]; heart development [GO:0007507]; ketone body catabolic process [GO:0046952]; ketone cata…	mitochondrial matrix [GO:0005759]; mitochondrion [GO:0005739]; nucleoplasm [GO:0005654]; 3-oxoacid CoA-transferase activity [GO:0008260]; protein homodimerization activity [GO:0042803]; adipose tissue development [GO:0060612]; brain development [GO:0007420]; cellular ketone body metabolic process [GO:0046950]; heart development [GO:0007507]; ketone body catabolic process [GO:0046952]; ketone cata…	3D-structure; Alternative splicing; Complete proteome; Direct protein sequencing; Disease mutation; Mitochondrion; Phosphoprotein; Polymorphism; Reference proteome; Transferase; Transit peptide	Key enzyme for ketone body catabolism. Transfers the CoA moiety from succinate to acetoacetate. Formation of the enzyme-CoA intermediate proceeds via an unstable anhydride species formed between the carboxylate groups of the enzyme and substrate.	Ketone metabolism; succinyl-CoA degradation; acetoacetyl-CoA from succinyl-CoA: step 1/1.	56158	56
SCF_HUMAN	TRUE	0.209885	1.1566	0.00927785	KITLG	NA	NA	3.771	3.01143	0.0159615	0.142611	0.171515	2.35568	6	0.0186794	0.00619554	0.00971506	NA	NA	NA	NA	NA	NA	NA	NA	NA
S4A7_HUMAN	TRUE	0.3058	1.2361	0.0192812	SLC4A7	SLC4A7 BT NBC2 NBC2B NBC3 NBCn1 SBC2 SLC4A6	Sodium bicarbonate cotransporter 3	2.54504	2.65721	0.0142774	0.183709	0.163429	2.35568	20	0.0186794	0.086624	0.0794645	1214	apical plasma membrane [GO:0016324]; basolateral plasma membrane [GO:0016323]; cytoplasmic vesicle [GO:0031410]; integral component of membrane [GO:0016021]; integral component of plasma membrane [GO:0005887]; plasma membrane [GO:0005886]; stereocilium [GO:0032420]; synapse [GO:0045202]; anion transmembrane transporter activity [GO:0008509]; inorganic anion exchanger activity [GO:0005452]; sodium…	apical plasma membrane [GO:0016324]; basolateral plasma membrane [GO:0016323]; cytoplasmic vesicle [GO:0031410]; integral component of membrane [GO:0016021]; integral component of plasma membrane [GO:0005887]; plasma membrane [GO:0005886]; stereocilium [GO:0032420]; synapse [GO:0045202]; anion transmembrane transporter activity [GO:0008509]; inorganic anion exchanger activity [GO:0005452]; sodium…	apical plasma membrane [GO:0016324]; basolateral plasma membrane [GO:0016323]; cytoplasmic vesicle [GO:0031410]; integral component of membrane [GO:0016021]; integral component of plasma membrane [GO:0005887]; plasma membrane [GO:0005886]; stereocilium [GO:0032420]; synapse [GO:0045202]; anion transmembrane transporter activity [GO:0008509]; inorganic anion exchanger activity [GO:0005452]; sodium…	Alternative splicing; Cell membrane; Cell projection; Complete proteome; Disulfide bond; Glycoprotein; Ion transport; Membrane; Phosphoprotein; Polymorphism; Reference proteome; Sodium; Sodium transport; Symport; Transmembrane; Transmembrane helix; Transport	Electroneutral sodium- and bicarbonate-dependent cotransporter with a Na(+):HCO3(-) 1:1 stoichiometry. Regulates intracellular pH and may play a role in bicarbonate salvage in secretory epithelia. May also have an associated sodium channel activity. {ECO:0000269|PubMed:10347222, ECO:0000269|PubMed:12403779}.	FALSE	136044	136
S2542_HUMAN	TRUE	0.197842	1.14698	0.0178264	SLC25A42	SLC25A42	Mitochondrial coenzyme A transporter SLC25A42	2.58147	2.64787	0.0145793	0.180226	0.163429	2.35568	20	0.0186794	0.0352415	0.0334963	318	integral component of membrane [GO:0016021]; mitochondrial inner membrane [GO:0005743]; mitochondrion [GO:0005739]; nucleus [GO:0005634]; adenosine-diphosphatase activity [GO:0043262]; ADP transmembrane transporter activity [GO:0015217]; AMP transmembrane transporter activity [GO:0080122]; ATP transmembrane transporter activity [GO:0005347]; coenzyme A transmembrane transporter activity [GO:00152…	integral component of membrane [GO:0016021]; mitochondrial inner membrane [GO:0005743]; mitochondrion [GO:0005739]; nucleus [GO:0005634]; adenosine-diphosphatase activity [GO:0043262]; ADP transmembrane transporter activity [GO:0015217]; AMP transmembrane transporter activity [GO:0080122]; ATP transmembrane transporter activity [GO:0005347]; coenzyme A transmembrane transporter activity [GO:00152…	integral component of membrane [GO:0016021]; mitochondrial inner membrane [GO:0005743]; mitochondrion [GO:0005739]; nucleus [GO:0005634]; adenosine-diphosphatase activity [GO:0043262]; ADP transmembrane transporter activity [GO:0015217]; AMP transmembrane transporter activity [GO:0080122]; ATP transmembrane transporter activity [GO:0005347]; coenzyme A transmembrane transporter activity [GO:00152…	Complete proteome; Membrane; Mitochondrion; Mitochondrion inner membrane; Polymorphism; Reference proteome; Repeat; Transmembrane; Transmembrane helix; Transport	Mitochondrial carrier mediating the transport of coenzyme A (CoA) in mitochondria in exchange for intramitochondrial (deoxy)adenine nucleotides and adenosine 3',5'-diphosphate. {ECO:0000269|PubMed:19429682}.	FALSE	35409	35
S1A7A_HUMAN	TRUE	0.552077	1.4662	0.0111092	S100A7A	NA	NA	3.6191	3.96954	0.0037772	0.154132	0.113526	2.35568	6	0.0186794	0.0465403	0.0386856	NA	NA	NA	NA	NA	NA	NA	NA	NA
S10A1_HUMAN	TRUE	0.235381	1.17722	0.0265319	S100A1	S100A1 S100A	Protein S100-A1	2.3949	2.48529	0.0208927	0.213273	0.191738	2.35568	20	0.0186794	0.0579588	0.0538198	94	extracellular region [GO:0005576]; M band [GO:0031430]; neuron projection [GO:0043005]; nucleus [GO:0005634]; protein complex [GO:0043234]; sarcoplasmic reticulum [GO:0016529]; Z disc [GO:0030018]; ATPase binding [GO:0051117]; calcium ion binding [GO:0005509]; calcium-dependent protein binding [GO:0048306]; identical protein binding [GO:0042802]; protein homodimerization activity [GO:0042803]; S1…	extracellular region [GO:0005576]; M band [GO:0031430]; neuron projection [GO:0043005]; nucleus [GO:0005634]; protein complex [GO:0043234]; sarcoplasmic reticulum [GO:0016529]; Z disc [GO:0030018]; ATPase binding [GO:0051117]; calcium ion binding [GO:0005509]; calcium-dependent protein binding [GO:0048306]; identical protein binding [GO:0042802]; protein homodimerization activity [GO:0042803]; S1…	extracellular region [GO:0005576]; M band [GO:0031430]; neuron projection [GO:0043005]; nucleus [GO:0005634]; protein complex [GO:0043234]; sarcoplasmic reticulum [GO:0016529]; Z disc [GO:0030018]; ATPase binding [GO:0051117]; calcium ion binding [GO:0005509]; calcium-dependent protein binding [GO:0048306]; identical protein binding [GO:0042802]; protein homodimerization activity [GO:0042803]; S1…	3D-structure; Calcium; Complete proteome; Cytoplasm; Metal-binding; Reference proteome; Repeat; S-nitrosylation	Probably acts as a Ca(2+) signal transducer (PubMed:22399290). In response to an increase in intracellular Ca(2+) levels, binds calcium which triggers a conformational change (PubMed:23351007). This conformational change allows interaction of S1001A with specific target proteins, such as TPR-containing proteins, and the modulation of their activity (PubMed:22399290). {ECO:0000269|PubMed:22399290,…	FALSE	10546	11
RWDD1_HUMAN	TRUE	0.14964	1.10929	0.0406551	RWDD1	RWDD1 DFRP2 CGI-24 PTD013	RWD domain-containing protein 1	2.18867	2.22824	0.0362289	0.256561	0.240405	2.35568	20	0.0186794	0.0280468	0.0270598	243	cytoplasm [GO:0005737]; polysome [GO:0005844]; androgen receptor signaling pathway [GO:0030521]; cell aging [GO:0007569]; cellular response to oxidative stress [GO:0034599]; cellular response to testosterone stimulus [GO:0071394]; cytoplasmic translation [GO:0002181]; positive regulation of androgen receptor activity [GO:2000825]	cytoplasm [GO:0005737]; polysome [GO:0005844]; androgen receptor signaling pathway [GO:0030521]; cell aging [GO:0007569]; cellular response to oxidative stress [GO:0034599]; cellular response to testosterone stimulus [GO:0071394]; cytoplasmic translation [GO:0002181]; positive regulation of androgen receptor activity [GO:2000825]	cytoplasm [GO:0005737]; polysome [GO:0005844]; androgen receptor signaling pathway [GO:0030521]; cell aging [GO:0007569]; cellular response to oxidative stress [GO:0034599]; cellular response to testosterone stimulus [GO:0071394]; cytoplasmic translation [GO:0002181]; positive regulation of androgen receptor activity [GO:2000825]	3D-structure; Acetylation; Alternative splicing; Complete proteome; Phosphoprotein; Reference proteome	Protects DRG2 from proteolytic degradation. {ECO:0000250}.	FALSE	27940	28
RUSD3_HUMAN	TRUE	0.0909738	1.06509	0.0392578	RPUSD3	RPUSD3	RNA pseudouridylate synthase domain-containing protein 3	2.20585	2.11525	0.0457777	0.253148	0.267486	2.35568	20	0.0186794	0.0102055	0.0110984	351	pseudouridine synthase activity [GO:0009982]; RNA binding [GO:0003723]; pseudouridine synthesis [GO:0001522]	pseudouridine synthase activity [GO:0009982]; RNA binding [GO:0003723]; pseudouridine synthesis [GO:0001522]	pseudouridine synthase activity [GO:0009982]; RNA binding [GO:0003723]; pseudouridine synthesis [GO:0001522]	Alternative splicing; Complete proteome; Phosphoprotein; Polymorphism; Reference proteome		FALSE	38461	38
RT33_HUMAN	TRUE	0.264542	1.20125	0.0140133	MRPS33	MRPS33 CGI-139 PTD003	28S ribosomal protein S33, mitochondrial	2.69226	2.79384	0.0104843	0.165973	0.149072	2.35568	20	0.0186794	0.0579303	0.0537944	106	mitochondrial inner membrane [GO:0005743]; mitochondrial small ribosomal subunit [GO:0005763]; mitochondrion [GO:0005739]; structural constituent of ribosome [GO:0003735]; mitochondrial translational elongation [GO:0070125]; mitochondrial translational termination [GO:0070126]; translation [GO:0006412]	mitochondrial inner membrane [GO:0005743]; mitochondrial small ribosomal subunit [GO:0005763]; mitochondrion [GO:0005739]; structural constituent of ribosome [GO:0003735]; mitochondrial translational elongation [GO:0070125]; mitochondrial translational termination [GO:0070126]; translation [GO:0006412]	mitochondrial inner membrane [GO:0005743]; mitochondrial small ribosomal subunit [GO:0005763]; mitochondrion [GO:0005739]; structural constituent of ribosome [GO:0003735]; mitochondrial translational elongation [GO:0070125]; mitochondrial translational termination [GO:0070126]; translation [GO:0006412]	3D-structure; Acetylation; Complete proteome; Mitochondrion; Reference proteome; Ribonucleoprotein; Ribosomal protein		FALSE	12629	13
RT24_HUMAN	TRUE	0.189994	1.14076	0.0426375	MRPS24	MRPS24 HSPC335	28S ribosomal protein S24, mitochondrial	2.16521	2.23654	0.035604	0.261991	0.238795	2.35568	20	0.0186794	0.0461985	0.0432988	167	mitochondrial inner membrane [GO:0005743]; mitochondrial ribosome [GO:0005761]; mitochondrial small ribosomal subunit [GO:0005763]	RNA binding [GO:0003723]; structural constituent of ribosome [GO:0003735]	mitochondrial translation [GO:0032543]; mitochondrial translational elongation [GO:0070125]; mitochondrial translational termination [GO:0070126]; translation [GO:0006412]	3D-structure; Complete proteome; Mitochondrion; Polymorphism; Reference proteome; Ribonucleoprotein; Ribosomal protein; Transit peptide			19015	19
RT23_HUMAN	TRUE	0.15103	1.11036	0.0323401	MRPS23	MRPS23 CGI-138 HSPC329	28S ribosomal protein S23, mitochondrial	2.30011	2.33455	0.0289372	0.232992	0.219124	2.35568	20	0.0186794	0.025869	0.0251114	190	intermediate filament cytoskeleton [GO:0045111]; mitochondrial inner membrane [GO:0005743]; mitochondrion [GO:0005739]; nuclear membrane [GO:0031965]; ribosome [GO:0005840]; RNA binding [GO:0003723]; structural constituent of ribosome [GO:0003735]; mitochondrial translational elongation [GO:0070125]; mitochondrial translational termination [GO:0070126]	intermediate filament cytoskeleton [GO:0045111]; mitochondrial inner membrane [GO:0005743]; mitochondrion [GO:0005739]; nuclear membrane [GO:0031965]; ribosome [GO:0005840]; RNA binding [GO:0003723]; structural constituent of ribosome [GO:0003735]; mitochondrial translational elongation [GO:0070125]; mitochondrial translational termination [GO:0070126]	intermediate filament cytoskeleton [GO:0045111]; mitochondrial inner membrane [GO:0005743]; mitochondrion [GO:0005739]; nuclear membrane [GO:0031965]; ribosome [GO:0005840]; RNA binding [GO:0003723]; structural constituent of ribosome [GO:0003735]; mitochondrial translational elongation [GO:0070125]; mitochondrial translational termination [GO:0070126]	3D-structure; Acetylation; Complete proteome; Disease mutation; Mitochondrion; Primary mitochondrial disease; Reference proteome; Ribonucleoprotein; Ribosomal protein		FALSE	21771	22
RT22_HUMAN	TRUE	0.165093	1.12124	0.00232135	MRPS22	MRPS22 C3orf5 RPMS22 GK002	28S ribosomal protein S22, mitochondrial	3.4875	3.4181	0.00242213	0.112743	0.111706	2.35568	20	0.0186794	0.0134456	0.0139971	360	mitochondrial inner membrane [GO:0005743]; mitochondrial ribosome [GO:0005761]; mitochondrial small ribosomal subunit [GO:0005763]; mitochondrion [GO:0005739]; structural constituent of ribosome [GO:0003735]; mitochondrial translational elongation [GO:0070125]; mitochondrial translational termination [GO:0070126]	mitochondrial inner membrane [GO:0005743]; mitochondrial ribosome [GO:0005761]; mitochondrial small ribosomal subunit [GO:0005763]; mitochondrion [GO:0005739]; structural constituent of ribosome [GO:0003735]; mitochondrial translational elongation [GO:0070125]; mitochondrial translational termination [GO:0070126]	mitochondrial inner membrane [GO:0005743]; mitochondrial ribosome [GO:0005761]; mitochondrial small ribosomal subunit [GO:0005763]; mitochondrion [GO:0005739]; structural constituent of ribosome [GO:0003735]; mitochondrial translational elongation [GO:0070125]; mitochondrial translational termination [GO:0070126]	3D-structure; Acetylation; Alternative splicing; Complete proteome; Disease mutation; Mitochondrion; Phosphoprotein; Primary mitochondrial disease; Reference proteome; Ribonucleoprotein; Ribosomal protein		FALSE	41280	41
RT21_HUMAN	TRUE	0.137715	1.10016	0.016491	MRPS21	MRPS21 RPMS21 MDS016	28S ribosomal protein S21, mitochondrial	2.61748	2.60045	0.016206	0.175569	0.171659	2.35568	20	0.0186794	0.0166091	0.0168273	87	mitochondrial inner membrane [GO:0005743]; mitochondrial small ribosomal subunit [GO:0005763]; RNA binding [GO:0003723]; structural constituent of ribosome [GO:0003735]; mitochondrial translation [GO:0032543]; mitochondrial translational elongation [GO:0070125]; mitochondrial translational termination [GO:0070126]; translation [GO:0006412]	mitochondrial inner membrane [GO:0005743]; mitochondrial small ribosomal subunit [GO:0005763]; RNA binding [GO:0003723]; structural constituent of ribosome [GO:0003735]; mitochondrial translation [GO:0032543]; mitochondrial translational elongation [GO:0070125]; mitochondrial translational termination [GO:0070126]; translation [GO:0006412]	mitochondrial inner membrane [GO:0005743]; mitochondrial small ribosomal subunit [GO:0005763]; RNA binding [GO:0003723]; structural constituent of ribosome [GO:0003735]; mitochondrial translation [GO:0032543]; mitochondrial translational elongation [GO:0070125]; mitochondrial translational termination [GO:0070126]; translation [GO:0006412]	3D-structure; Complete proteome; Mitochondrion; Polymorphism; Reference proteome; Ribonucleoprotein; Ribosomal protein		FALSE	10742	11
RT17_HUMAN	TRUE	0.166885	1.12263	0.0300509	MRPS17	MRPS17 RPMS17 HSPC011	28S ribosomal protein S17, mitochondrial	2.33543	2.38499	0.0259722	0.22461	0.208864	2.35568	20	0.0186794	0.0306375	0.0293774	130	mitochondrial inner membrane [GO:0005743]; mitochondrial small ribosomal subunit [GO:0005763]; rRNA binding [GO:0019843]; structural constituent of ribosome [GO:0003735]; mitochondrial translation [GO:0032543]; mitochondrial translational elongation [GO:0070125]; mitochondrial translational termination [GO:0070126]; translation [GO:0006412]	mitochondrial inner membrane [GO:0005743]; mitochondrial small ribosomal subunit [GO:0005763]; rRNA binding [GO:0019843]; structural constituent of ribosome [GO:0003735]; mitochondrial translation [GO:0032543]; mitochondrial translational elongation [GO:0070125]; mitochondrial translational termination [GO:0070126]; translation [GO:0006412]	mitochondrial inner membrane [GO:0005743]; mitochondrial small ribosomal subunit [GO:0005763]; rRNA binding [GO:0019843]; structural constituent of ribosome [GO:0003735]; mitochondrial translation [GO:0032543]; mitochondrial translational elongation [GO:0070125]; mitochondrial translational termination [GO:0070126]; translation [GO:0006412]	3D-structure; Complete proteome; Mitochondrion; RNA-binding; Reference proteome; Ribonucleoprotein; Ribosomal protein; Transit peptide; rRNA-binding		FALSE	14502	15
RT15_HUMAN	TRUE	0.256664	1.19471	0.00338466	MRPS15	MRPS15 RPMS15 DC37	28S ribosomal protein S15, mitochondrial	3.32399	3.41098	0.00246393	0.122032	0.111706	2.35568	20	0.0186794	0.0357736	0.0339724	257	mitochondrial inner membrane [GO:0005743]; mitochondrial small ribosomal subunit [GO:0005763]; mitochondrion [GO:0005739]; nucleolus [GO:0005730]; nucleus [GO:0005634]; RNA binding [GO:0003723]; structural constituent of ribosome [GO:0003735]; mitochondrial translation [GO:0032543]; mitochondrial translational elongation [GO:0070125]; mitochondrial translational termination [GO:0070126]; translat…	mitochondrial inner membrane [GO:0005743]; mitochondrial small ribosomal subunit [GO:0005763]; mitochondrion [GO:0005739]; nucleolus [GO:0005730]; nucleus [GO:0005634]; RNA binding [GO:0003723]; structural constituent of ribosome [GO:0003735]; mitochondrial translation [GO:0032543]; mitochondrial translational elongation [GO:0070125]; mitochondrial translational termination [GO:0070126]; translat…	mitochondrial inner membrane [GO:0005743]; mitochondrial small ribosomal subunit [GO:0005763]; mitochondrion [GO:0005739]; nucleolus [GO:0005730]; nucleus [GO:0005634]; RNA binding [GO:0003723]; structural constituent of ribosome [GO:0003735]; mitochondrial translation [GO:0032543]; mitochondrial translational elongation [GO:0070125]; mitochondrial translational termination [GO:0070126]; translat…	3D-structure; Complete proteome; Mitochondrion; Reference proteome; Ribonucleoprotein; Ribosomal protein; Transit peptide		FALSE	29842	30
RT10_HUMAN	TRUE	0.294405	1.22638	0.00177207	MRPS10	MRPS10 MSTP040	28S ribosomal protein S10, mitochondrial	3.60394	3.70971	0.00119602	0.112467	0.108611	2.35568	20	0.0186794	0.0400394	0.0377886	201	mitochondrial inner membrane [GO:0005743]; mitochondrial small ribosomal subunit [GO:0005763]; mitochondrion [GO:0005739]; mitochondrial translational elongation [GO:0070125]; mitochondrial translational termination [GO:0070126]	mitochondrial inner membrane [GO:0005743]; mitochondrial small ribosomal subunit [GO:0005763]; mitochondrion [GO:0005739]; mitochondrial translational elongation [GO:0070125]; mitochondrial translational termination [GO:0070126]	mitochondrial inner membrane [GO:0005743]; mitochondrial small ribosomal subunit [GO:0005763]; mitochondrion [GO:0005739]; mitochondrial translational elongation [GO:0070125]; mitochondrial translational termination [GO:0070126]	3D-structure; Complete proteome; Mitochondrion; Reference proteome; Ribonucleoprotein; Ribosomal protein		FALSE	22999	23
RT09_HUMAN	TRUE	0.120677	1.08725	0.00565411	MRPS9	MRPS9 RPMS9	28S ribosomal protein S9, mitochondrial	3.09928	2.94038	0.00748748	0.133176	0.132753	2.35568	20	0.0186794	0.00909666	0.0101064	396	mitochondrial inner membrane [GO:0005743]; mitochondrial small ribosomal subunit [GO:0005763]; mitochondrion [GO:0005739]; nucleolus [GO:0005730]; RNA binding [GO:0003723]; structural constituent of ribosome [GO:0003735]; DNA damage response, detection of DNA damage [GO:0042769]; maturation of SSU-rRNA from tricistronic rRNA transcript (SSU-rRNA, 5.8S rRNA, LSU-rRNA) [GO:0000462]; mitochondrial t…	mitochondrial inner membrane [GO:0005743]; mitochondrial small ribosomal subunit [GO:0005763]; mitochondrion [GO:0005739]; nucleolus [GO:0005730]; RNA binding [GO:0003723]; structural constituent of ribosome [GO:0003735]; DNA damage response, detection of DNA damage [GO:0042769]; maturation of SSU-rRNA from tricistronic rRNA transcript (SSU-rRNA, 5.8S rRNA, LSU-rRNA) [GO:0000462]; mitochondrial t…	mitochondrial inner membrane [GO:0005743]; mitochondrial small ribosomal subunit [GO:0005763]; mitochondrion [GO:0005739]; nucleolus [GO:0005730]; RNA binding [GO:0003723]; structural constituent of ribosome [GO:0003735]; DNA damage response, detection of DNA damage [GO:0042769]; maturation of SSU-rRNA from tricistronic rRNA transcript (SSU-rRNA, 5.8S rRNA, LSU-rRNA) [GO:0000462]; mitochondrial t…	3D-structure; Acetylation; Complete proteome; Mitochondrion; Polymorphism; Reference proteome; Ribonucleoprotein; Ribosomal protein; Transit peptide		FALSE	45835	46
RT05_HUMAN	TRUE	0.128859	1.09343	0.0302165	MRPS5	MRPS5	28S ribosomal protein S5, mitochondrial	2.33279	2.3303	0.0292005	0.22461	0.21941	2.35568	20	0.0186794	0.0183076	0.0183468	430	mitochondrial inner membrane [GO:0005743]; mitochondrial small ribosomal subunit [GO:0005763]; mitochondrion [GO:0005739]; RNA binding [GO:0003723]; structural constituent of ribosome [GO:0003735]; mitochondrial translational elongation [GO:0070125]; mitochondrial translational termination [GO:0070126]; translation [GO:0006412]	mitochondrial inner membrane [GO:0005743]; mitochondrial small ribosomal subunit [GO:0005763]; mitochondrion [GO:0005739]; RNA binding [GO:0003723]; structural constituent of ribosome [GO:0003735]; mitochondrial translational elongation [GO:0070125]; mitochondrial translational termination [GO:0070126]; translation [GO:0006412]	mitochondrial inner membrane [GO:0005743]; mitochondrial small ribosomal subunit [GO:0005763]; mitochondrion [GO:0005739]; RNA binding [GO:0003723]; structural constituent of ribosome [GO:0003735]; mitochondrial translational elongation [GO:0070125]; mitochondrial translational termination [GO:0070126]; translation [GO:0006412]	3D-structure; Alternative splicing; Complete proteome; Mitochondrion; Reference proteome; Ribonucleoprotein; Ribosomal protein		FALSE	48006	48
RRFM_HUMAN	TRUE	0.143261	1.1044	0.0234976	MRRF	MRRF	Ribosome-recycling factor, mitochondrial	2.45239	2.46381	0.0218959	0.202492	0.195716	2.35568	20	0.0186794	0.020475	0.0202858	262	mitochondrial matrix [GO:0005759]; mitochondrion [GO:0005739]; ribosomal large subunit binding [GO:0043023]; mitochondrial translational termination [GO:0070126]; ribosome disassembly [GO:0032790]; translation [GO:0006412]	mitochondrial matrix [GO:0005759]; mitochondrion [GO:0005739]; ribosomal large subunit binding [GO:0043023]; mitochondrial translational termination [GO:0070126]; ribosome disassembly [GO:0032790]; translation [GO:0006412]	mitochondrial matrix [GO:0005759]; mitochondrion [GO:0005739]; ribosomal large subunit binding [GO:0043023]; mitochondrial translational termination [GO:0070126]; ribosome disassembly [GO:0032790]; translation [GO:0006412]	Alternative splicing; Complete proteome; Mitochondrion; Polymorphism; Protein biosynthesis; Reference proteome; Transit peptide	Responsible for the release of ribosomes from messenger RNA at the termination of protein biosynthesis. May increase the efficiency of translation by recycling ribosomes from one round of translation to another (By similarity). {ECO:0000250}.	FALSE	29277	29
RRAS2_HUMAN	TRUE	0.14808	1.10809	0.0153893	RRAS2	RRAS2 TC21	Ras-related protein R-Ras2	2.64931	2.6498	0.0145164	0.171499	0.163429	2.35568	20	0.0186794	0.0187447	0.0187378	204	endoplasmic reticulum [GO:0005783]; extracellular exosome [GO:0070062]; focal adhesion [GO:0005925]; membrane [GO:0016020]; plasma membrane [GO:0005886]; GTP binding [GO:0005525]; GTPase activity [GO:0003924]; osteoblast differentiation [GO:0001649]; positive regulation of cell migration [GO:0030335]; Ras protein signal transduction [GO:0007265]; regulation of neuron death [GO:1901214]	endoplasmic reticulum [GO:0005783]; extracellular exosome [GO:0070062]; focal adhesion [GO:0005925]; membrane [GO:0016020]; plasma membrane [GO:0005886]; GTP binding [GO:0005525]; GTPase activity [GO:0003924]; osteoblast differentiation [GO:0001649]; positive regulation of cell migration [GO:0030335]; Ras protein signal transduction [GO:0007265]; regulation of neuron death [GO:1901214]	endoplasmic reticulum [GO:0005783]; extracellular exosome [GO:0070062]; focal adhesion [GO:0005925]; membrane [GO:0016020]; plasma membrane [GO:0005886]; GTP binding [GO:0005525]; GTPase activity [GO:0003924]; osteoblast differentiation [GO:0001649]; positive regulation of cell migration [GO:0030335]; Ras protein signal transduction [GO:0007265]; regulation of neuron death [GO:1901214]	3D-structure; Acetylation; Alternative splicing; Cell membrane; Complete proteome; Disease mutation; GTP-binding; Lipoprotein; Membrane; Methylation; Nucleotide-binding; Palmitate; Phosphoprotein; Prenylation; Proto-oncogene; Reference proteome	It is a plasma membrane-associated GTP-binding protein with GTPase activity. Might transduce growth inhibitory signals across the cell membrane, exerting its effect through an effector shared with the Ras proteins but in an antagonistic fashion.	FALSE	23400	23
ROCK2_HUMAN	TRUE	0.0517501	1.03652	0.0264424	ROCK2	ROCK2 KIAA0619	Rho-associated protein kinase 2	2.39651	1.89571	0.0710003	0.213243	0.317965	2.35568	20	0.0186794	0.00279779	0.00447127	1388	centrosome [GO:0005813]; cytoplasmic ribonucleoprotein granule [GO:0036464]; cytosol [GO:0005829]; nucleus [GO:0005634]; plasma membrane [GO:0005886]; ATP binding [GO:0005524]; metal ion binding [GO:0046872]; protein serine/threonine kinase activity [GO:0004674]; Rho GTPase binding [GO:0017048]; Rho-dependent protein serine/threonine kinase activity [GO:0072518]; RNA binding [GO:0003723]; structu…	centrosome [GO:0005813]; cytoplasmic ribonucleoprotein granule [GO:0036464]; cytosol [GO:0005829]; nucleus [GO:0005634]; plasma membrane [GO:0005886]; ATP binding [GO:0005524]; metal ion binding [GO:0046872]; protein serine/threonine kinase activity [GO:0004674]; Rho GTPase binding [GO:0017048]; Rho-dependent protein serine/threonine kinase activity [GO:0072518]; RNA binding [GO:0003723]; structu…	centrosome [GO:0005813]; cytoplasmic ribonucleoprotein granule [GO:0036464]; cytosol [GO:0005829]; nucleus [GO:0005634]; plasma membrane [GO:0005886]; ATP binding [GO:0005524]; metal ion binding [GO:0046872]; protein serine/threonine kinase activity [GO:0004674]; Rho GTPase binding [GO:0017048]; Rho-dependent protein serine/threonine kinase activity [GO:0072518]; RNA binding [GO:0003723]; structu…	3D-structure; ATP-binding; Biological rhythms; Cell membrane; Coiled coil; Complete proteome; Cytoplasm; Cytoskeleton; Kinase; Magnesium; Membrane; Metal-binding; Nucleotide-binding; Nucleus; Phosphoprotein; Polymorphism; Reference proteome; Serine/threonine-protein kinase; Transferase; Zinc; Zinc-finger	Protein kinase which is a key regulator of actin cytoskeleton and cell polarity. Involved in regulation of smooth muscle contraction, actin cytoskeleton organization, stress fiber and focal adhesion formation, neurite retraction, cell adhesion and motility via phosphorylation of ADD1, BRCA2, CNN1, EZR, DPYSL2, EP300, MSN, MYL9/MLC2, NPM1, RDX, PPP1R12A and VIM. Phosphorylates SORL1 and IRF4. Acts…	FALSE	160900	161
RM54_HUMAN	TRUE	0.189471	1.14035	0.0488916	MRPL54	MRPL54	39S ribosomal protein L54, mitochondrial	2.17262	2.23995	0.0402859	0.276972	0.253575	2.35568	13	0.0186794	0.0304214	0.0286201	138	mitochondrial inner membrane [GO:0005743]; mitochondrial large ribosomal subunit [GO:0005762]; RNA binding [GO:0003723]; mitochondrial translational elongation [GO:0070125]; mitochondrial translational termination [GO:0070126]	mitochondrial inner membrane [GO:0005743]; mitochondrial large ribosomal subunit [GO:0005762]; RNA binding [GO:0003723]; mitochondrial translational elongation [GO:0070125]; mitochondrial translational termination [GO:0070126]	mitochondrial inner membrane [GO:0005743]; mitochondrial large ribosomal subunit [GO:0005762]; RNA binding [GO:0003723]; mitochondrial translational elongation [GO:0070125]; mitochondrial translational termination [GO:0070126]	3D-structure; Complete proteome; Mitochondrion; Reference proteome; Ribonucleoprotein; Ribosomal protein; Transit peptide		FALSE	15819	16
RM50_HUMAN	TRUE	0.168612	1.12398	0.00617854	MRPL50	MRPL50	39S ribosomal protein L50, mitochondrial	3.06011	3.05601	0.00572038	0.136468	0.129453	2.35568	20	0.0186794	0.018216	0.0182648	158	mitochondrial inner membrane [GO:0005743]; mitochondrial large ribosomal subunit [GO:0005762]; mitochondrial translational elongation [GO:0070125]; mitochondrial translational termination [GO:0070126]	mitochondrial inner membrane [GO:0005743]; mitochondrial large ribosomal subunit [GO:0005762]; mitochondrial translational elongation [GO:0070125]; mitochondrial translational termination [GO:0070126]	mitochondrial inner membrane [GO:0005743]; mitochondrial large ribosomal subunit [GO:0005762]; mitochondrial translational elongation [GO:0070125]; mitochondrial translational termination [GO:0070126]	3D-structure; Alternative splicing; Complete proteome; Mitochondrion; Polymorphism; Reference proteome; Ribonucleoprotein; Ribosomal protein		FALSE	18325	18
RM49_HUMAN	TRUE	0.169008	1.12429	0.0298992	MRPL49	MRPL49 C11orf4 NOF1 OK/SW-cl.67	39S ribosomal protein L49, mitochondrial	2.33786	2.38931	0.0257319	0.224513	0.208864	2.35568	20	0.0186794	0.0313568	0.0300209	166	mitochondrial inner membrane [GO:0005743]; mitochondrial large ribosomal subunit [GO:0005762]; mitochondrial ribosome [GO:0005761]; structural constituent of ribosome [GO:0003735]; mitochondrial translational elongation [GO:0070125]; mitochondrial translational termination [GO:0070126]	mitochondrial inner membrane [GO:0005743]; mitochondrial large ribosomal subunit [GO:0005762]; mitochondrial ribosome [GO:0005761]; structural constituent of ribosome [GO:0003735]; mitochondrial translational elongation [GO:0070125]; mitochondrial translational termination [GO:0070126]	mitochondrial inner membrane [GO:0005743]; mitochondrial large ribosomal subunit [GO:0005762]; mitochondrial ribosome [GO:0005761]; structural constituent of ribosome [GO:0003735]; mitochondrial translational elongation [GO:0070125]; mitochondrial translational termination [GO:0070126]	3D-structure; Complete proteome; Mitochondrion; Polymorphism; Reference proteome; Ribonucleoprotein; Ribosomal protein		FALSE	19198	19
RM46_HUMAN	TRUE	0.150835	1.11021	0.0141287	MRPL46	MRPL46 C15orf4 LIECG2	39S ribosomal protein L46, mitochondrial	2.68851	2.69005	0.0132623	0.166535	0.159046	2.35568	20	0.0186794	0.0188857	0.018864	279	cell junction [GO:0030054]; mitochondrial inner membrane [GO:0005743]; mitochondrial large ribosomal subunit [GO:0005762]; mitochondrion [GO:0005739]; nucleoplasm [GO:0005654]; hydrolase activity [GO:0016787]; structural constituent of ribosome [GO:0003735]; mitochondrial translational elongation [GO:0070125]; mitochondrial translational termination [GO:0070126]	cell junction [GO:0030054]; mitochondrial inner membrane [GO:0005743]; mitochondrial large ribosomal subunit [GO:0005762]; mitochondrion [GO:0005739]; nucleoplasm [GO:0005654]; hydrolase activity [GO:0016787]; structural constituent of ribosome [GO:0003735]; mitochondrial translational elongation [GO:0070125]; mitochondrial translational termination [GO:0070126]	cell junction [GO:0030054]; mitochondrial inner membrane [GO:0005743]; mitochondrial large ribosomal subunit [GO:0005762]; mitochondrion [GO:0005739]; nucleoplasm [GO:0005654]; hydrolase activity [GO:0016787]; structural constituent of ribosome [GO:0003735]; mitochondrial translational elongation [GO:0070125]; mitochondrial translational termination [GO:0070126]	3D-structure; Acetylation; Complete proteome; Mitochondrion; Polymorphism; Reference proteome; Ribonucleoprotein; Ribosomal protein; Transit peptide		FALSE	31705	32
RM44_HUMAN	TRUE	0.139057	1.10118	0.0105721	MRPL44	MRPL44	39S ribosomal protein L44, mitochondrial	2.82026	2.77947	0.0108329	0.150268	0.150594	2.35568	20	0.0186794	0.0145867	0.0150179	332	mitochondrial inner membrane [GO:0005743]; mitochondrial large ribosomal subunit [GO:0005762]; mitochondrion [GO:0005739]; nucleus [GO:0005634]; plasma membrane [GO:0005886]; ribonuclease III activity [GO:0004525]; RNA binding [GO:0003723]; mitochondrial translational elongation [GO:0070125]; mitochondrial translational termination [GO:0070126]; RNA processing [GO:0006396]	mitochondrial inner membrane [GO:0005743]; mitochondrial large ribosomal subunit [GO:0005762]; mitochondrion [GO:0005739]; nucleus [GO:0005634]; plasma membrane [GO:0005886]; ribonuclease III activity [GO:0004525]; RNA binding [GO:0003723]; mitochondrial translational elongation [GO:0070125]; mitochondrial translational termination [GO:0070126]; RNA processing [GO:0006396]	mitochondrial inner membrane [GO:0005743]; mitochondrial large ribosomal subunit [GO:0005762]; mitochondrion [GO:0005739]; nucleus [GO:0005634]; plasma membrane [GO:0005886]; ribonuclease III activity [GO:0004525]; RNA binding [GO:0003723]; mitochondrial translational elongation [GO:0070125]; mitochondrial translational termination [GO:0070126]; RNA processing [GO:0006396]	3D-structure; Complete proteome; Disease mutation; Endonuclease; Hydrolase; Mitochondrion; Nuclease; Polymorphism; Primary mitochondrial disease; RNA-binding; Reference proteome; Ribonucleoprotein; Ribosomal protein; Transit peptide	Component of the 39S subunit of mitochondrial ribosome. May have a function in the assembly/stability of nascent mitochondrial polypeptides exiting the ribosome. {ECO:0000269|PubMed:23315540}.	FALSE	37535	38
RM41_HUMAN	TRUE	0.229184	1.17217	0.00392615	MRPL41	MRPL41 BMRP MRPL27 RPML27 PIG3	39S ribosomal protein L41, mitochondrial	3.2593	3.32482	0.00302862	0.123391	0.113342	2.35568	20	0.0186794	0.0296668	0.028509	137	intracellular ribonucleoprotein complex [GO:0030529]; mitochondrial inner membrane [GO:0005743]; mitochondrial large ribosomal subunit [GO:0005762]; mitochondrion [GO:0005739]; RNA binding [GO:0003723]; structural constituent of ribosome [GO:0003735]; apoptotic process [GO:0006915]; cell cycle [GO:0007049]; mitochondrial translational elongation [GO:0070125]; mitochondrial translational terminati…	intracellular ribonucleoprotein complex [GO:0030529]; mitochondrial inner membrane [GO:0005743]; mitochondrial large ribosomal subunit [GO:0005762]; mitochondrion [GO:0005739]; RNA binding [GO:0003723]; structural constituent of ribosome [GO:0003735]; apoptotic process [GO:0006915]; cell cycle [GO:0007049]; mitochondrial translational elongation [GO:0070125]; mitochondrial translational terminati…	intracellular ribonucleoprotein complex [GO:0030529]; mitochondrial inner membrane [GO:0005743]; mitochondrial large ribosomal subunit [GO:0005762]; mitochondrion [GO:0005739]; RNA binding [GO:0003723]; structural constituent of ribosome [GO:0003735]; apoptotic process [GO:0006915]; cell cycle [GO:0007049]; mitochondrial translational elongation [GO:0070125]; mitochondrial translational terminati…	3D-structure; Apoptosis; Cell cycle; Complete proteome; Mitochondrion; Reference proteome; Ribonucleoprotein; Ribosomal protein; Transit peptide	Component of the mitochondrial ribosome large subunit (PubMed:25278503, PubMed:25838379). Also involved in apoptosis and cell cycle (PubMed:16024796, PubMed:16256947). Enhances p53/TP53 stability, thereby contributing to p53/TP53-induced apoptosis in response to growth-inhibitory condition. Enhances p53/TP53 translocation to the mitochondria. Has the ability to arrest the cell cycle at the G1 pha…	FALSE	15383	15
RM39_HUMAN	TRUE	0.104878	1.0754	0.0279634	MRPL39	MRPL39 C21orf92 MRPL5 RPML5 MSTP003 PRED22	39S ribosomal protein L39, mitochondrial	2.36988	2.29952	0.0311762	0.216615	0.227422	2.35568	20	0.0186794	0.0117508	0.0124809	338	mitochondrial inner membrane [GO:0005743]; mitochondrial large ribosomal subunit [GO:0005762]; mitochondrial ribosome [GO:0005761]; nucleotide binding [GO:0000166]; RNA binding [GO:0003723]; mitochondrial translational elongation [GO:0070125]; mitochondrial translational termination [GO:0070126]	mitochondrial inner membrane [GO:0005743]; mitochondrial large ribosomal subunit [GO:0005762]; mitochondrial ribosome [GO:0005761]; nucleotide binding [GO:0000166]; RNA binding [GO:0003723]; mitochondrial translational elongation [GO:0070125]; mitochondrial translational termination [GO:0070126]	mitochondrial inner membrane [GO:0005743]; mitochondrial large ribosomal subunit [GO:0005762]; mitochondrial ribosome [GO:0005761]; nucleotide binding [GO:0000166]; RNA binding [GO:0003723]; mitochondrial translational elongation [GO:0070125]; mitochondrial translational termination [GO:0070126]	3D-structure; Acetylation; Alternative splicing; Complete proteome; Mitochondrion; Polymorphism; Reference proteome; Ribonucleoprotein; Ribosomal protein		FALSE	38712	39
RM38_HUMAN	TRUE	0.0968222	1.06942	0.0263421	MRPL38	MRPL38 HSPC262	39S ribosomal protein L38, mitochondrial	2.39832	2.29097	0.031746	0.213243	0.228863	2.35568	20	0.0186794	0.00977886	0.0107167	380	mitochondrial inner membrane [GO:0005743]; mitochondrial large ribosomal subunit [GO:0005762]; mitochondrial translational elongation [GO:0070125]; mitochondrial translational termination [GO:0070126]	mitochondrial inner membrane [GO:0005743]; mitochondrial large ribosomal subunit [GO:0005762]; mitochondrial translational elongation [GO:0070125]; mitochondrial translational termination [GO:0070126]	mitochondrial inner membrane [GO:0005743]; mitochondrial large ribosomal subunit [GO:0005762]; mitochondrial translational elongation [GO:0070125]; mitochondrial translational termination [GO:0070126]	3D-structure; Alternative splicing; Coiled coil; Complete proteome; Mitochondrion; Polymorphism; Reference proteome; Ribonucleoprotein; Ribosomal protein; Transit peptide		FALSE	44597	45
RM33_HUMAN	TRUE	0.205972	1.15346	0.00430044	MRPL33	NA	NA	3.45093	3.37147	0.00408034	0.124774	0.115691	2.35568	13	0.0186794	0.0142496	0.0149292	NA	NA	NA	NA	NA	NA	NA	NA	NA
RM32_HUMAN	TRUE	0.19057	1.14121	0.0134499	MRPL32	MRPL32 HSPC283	39S ribosomal protein L32, mitochondrial	2.85797	2.84701	0.0120213	0.163974	0.155949	2.35568	13	0.0186794	0.017785	0.0179222	188	mitochondrial inner membrane [GO:0005743]; mitochondrial large ribosomal subunit [GO:0005762]; mitochondrial ribosome [GO:0005761]; RNA binding [GO:0003723]; structural constituent of ribosome [GO:0003735]; mitochondrial translational elongation [GO:0070125]; mitochondrial translational termination [GO:0070126]; translation [GO:0006412]	mitochondrial inner membrane [GO:0005743]; mitochondrial large ribosomal subunit [GO:0005762]; mitochondrial ribosome [GO:0005761]; RNA binding [GO:0003723]; structural constituent of ribosome [GO:0003735]; mitochondrial translational elongation [GO:0070125]; mitochondrial translational termination [GO:0070126]; translation [GO:0006412]	mitochondrial inner membrane [GO:0005743]; mitochondrial large ribosomal subunit [GO:0005762]; mitochondrial ribosome [GO:0005761]; RNA binding [GO:0003723]; structural constituent of ribosome [GO:0003735]; mitochondrial translational elongation [GO:0070125]; mitochondrial translational termination [GO:0070126]; translation [GO:0006412]	3D-structure; Complete proteome; Mitochondrion; Reference proteome; Ribonucleoprotein; Ribosomal protein; Transit peptide		FALSE	21405	21
RM24_HUMAN	TRUE	0.158858	1.1164	0.00535189	MRPL24	MRPL24	39S ribosomal protein L24, mitochondrial	3.12349	3.09051	0.00527603	0.131969	0.126228	2.35568	20	0.0186794	0.01552	0.0158529	216	mitochondrial inner membrane [GO:0005743]; mitochondrial large ribosomal subunit [GO:0005762]; structural constituent of ribosome [GO:0003735]; mitochondrial translational elongation [GO:0070125]; mitochondrial translational termination [GO:0070126]; translation [GO:0006412]	mitochondrial inner membrane [GO:0005743]; mitochondrial large ribosomal subunit [GO:0005762]; structural constituent of ribosome [GO:0003735]; mitochondrial translational elongation [GO:0070125]; mitochondrial translational termination [GO:0070126]; translation [GO:0006412]	mitochondrial inner membrane [GO:0005743]; mitochondrial large ribosomal subunit [GO:0005762]; structural constituent of ribosome [GO:0003735]; mitochondrial translational elongation [GO:0070125]; mitochondrial translational termination [GO:0070126]; translation [GO:0006412]	3D-structure; Complete proteome; Mitochondrion; Phosphoprotein; Reference proteome; Ribonucleoprotein; Ribosomal protein; Transit peptide		FALSE	24915	25
RM23_HUMAN	TRUE	0.184093	1.1361	0.00316992	MRPL23	MRPL23 L23MRP RPL23L	39S ribosomal protein L23, mitochondrial	3.3525	3.34678	0.00287377	0.122032	0.113342	2.35568	20	0.0186794	0.0180921	0.018154	153	fibrillar center [GO:0001650]; mitochondrial inner membrane [GO:0005743]; mitochondrial large ribosomal subunit [GO:0005762]; mitochondrion [GO:0005739]; RNA binding [GO:0003723]; structural constituent of ribosome [GO:0003735]; mitochondrial translation [GO:0032543]; mitochondrial translational elongation [GO:0070125]; mitochondrial translational termination [GO:0070126]; translation [GO:0006412]	fibrillar center [GO:0001650]; mitochondrial inner membrane [GO:0005743]; mitochondrial large ribosomal subunit [GO:0005762]; mitochondrion [GO:0005739]; RNA binding [GO:0003723]; structural constituent of ribosome [GO:0003735]; mitochondrial translation [GO:0032543]; mitochondrial translational elongation [GO:0070125]; mitochondrial translational termination [GO:0070126]; translation [GO:0006412]	fibrillar center [GO:0001650]; mitochondrial inner membrane [GO:0005743]; mitochondrial large ribosomal subunit [GO:0005762]; mitochondrion [GO:0005739]; RNA binding [GO:0003723]; structural constituent of ribosome [GO:0003735]; mitochondrial translation [GO:0032543]; mitochondrial translational elongation [GO:0070125]; mitochondrial translational termination [GO:0070126]; translation [GO:0006412]	3D-structure; Complete proteome; Mitochondrion; Polymorphism; Reference proteome; Ribonucleoprotein; Ribosomal protein		FALSE	17781	18
RM22_HUMAN	TRUE	0.168702	1.12405	0.00194672	MRPL22	MRPL22 MRPL25 RPML25 HSPC158	39S ribosomal protein L22, mitochondrial	3.56345	3.49258	0.00202457	0.112467	0.108611	2.35568	20	0.0186794	0.0134478	0.013999	206	mitochondrial inner membrane [GO:0005743]; mitochondrial large ribosomal subunit [GO:0005762]; mitochondrion [GO:0005739]; RNA binding [GO:0003723]; structural constituent of ribosome [GO:0003735]; mitochondrial translational elongation [GO:0070125]; mitochondrial translational termination [GO:0070126]	mitochondrial inner membrane [GO:0005743]; mitochondrial large ribosomal subunit [GO:0005762]; mitochondrion [GO:0005739]; RNA binding [GO:0003723]; structural constituent of ribosome [GO:0003735]; mitochondrial translational elongation [GO:0070125]; mitochondrial translational termination [GO:0070126]	mitochondrial inner membrane [GO:0005743]; mitochondrial large ribosomal subunit [GO:0005762]; mitochondrion [GO:0005739]; RNA binding [GO:0003723]; structural constituent of ribosome [GO:0003735]; mitochondrial translational elongation [GO:0070125]; mitochondrial translational termination [GO:0070126]	3D-structure; Alternative splicing; Complete proteome; Mitochondrion; Polymorphism; Reference proteome; Ribonucleoprotein; Ribosomal protein; Transit peptide		FALSE	23641	24
RM20_HUMAN	TRUE	0.25541	1.19367	0.00435415	MRPL20	MRPL20	39S ribosomal protein L20, mitochondrial	3.21406	3.30352	0.00318664	0.124927	0.113342	2.35568	20	0.0186794	0.0378893	0.0358651	149	mitochondrial inner membrane [GO:0005743]; mitochondrial large ribosomal subunit [GO:0005762]; mitochondrial ribosome [GO:0005761]; mitochondrion [GO:0005739]; RNA binding [GO:0003723]; rRNA binding [GO:0019843]; structural constituent of ribosome [GO:0003735]; mitochondrial translational elongation [GO:0070125]; mitochondrial translational termination [GO:0070126]	mitochondrial inner membrane [GO:0005743]; mitochondrial large ribosomal subunit [GO:0005762]; mitochondrial ribosome [GO:0005761]; mitochondrion [GO:0005739]; RNA binding [GO:0003723]; rRNA binding [GO:0019843]; structural constituent of ribosome [GO:0003735]; mitochondrial translational elongation [GO:0070125]; mitochondrial translational termination [GO:0070126]	mitochondrial inner membrane [GO:0005743]; mitochondrial large ribosomal subunit [GO:0005762]; mitochondrial ribosome [GO:0005761]; mitochondrion [GO:0005739]; RNA binding [GO:0003723]; rRNA binding [GO:0019843]; structural constituent of ribosome [GO:0003735]; mitochondrial translational elongation [GO:0070125]; mitochondrial translational termination [GO:0070126]	3D-structure; Alternative splicing; Complete proteome; Mitochondrion; Reference proteome; Ribonucleoprotein; Ribosomal protein; Transit peptide		FALSE	17443	17
RM19_HUMAN	TRUE	0.174687	1.12872	0.0164794	MRPL19	MRPL19 KIAA0104 MRPL15	39S ribosomal protein L19, mitochondrial	2.6178	2.66031	0.0141787	0.175569	0.163429	2.35568	20	0.0186794	0.0267178	0.0258708	292	mitochondrial inner membrane [GO:0005743]; mitochondrial large ribosomal subunit [GO:0005762]; mitochondrion [GO:0005739]; nuclear membrane [GO:0031965]; nucleus [GO:0005634]; structural constituent of ribosome [GO:0003735]; mitochondrial translational elongation [GO:0070125]; mitochondrial translational termination [GO:0070126]	mitochondrial inner membrane [GO:0005743]; mitochondrial large ribosomal subunit [GO:0005762]; mitochondrion [GO:0005739]; nuclear membrane [GO:0031965]; nucleus [GO:0005634]; structural constituent of ribosome [GO:0003735]; mitochondrial translational elongation [GO:0070125]; mitochondrial translational termination [GO:0070126]	mitochondrial inner membrane [GO:0005743]; mitochondrial large ribosomal subunit [GO:0005762]; mitochondrion [GO:0005739]; nuclear membrane [GO:0031965]; nucleus [GO:0005634]; structural constituent of ribosome [GO:0003735]; mitochondrial translational elongation [GO:0070125]; mitochondrial translational termination [GO:0070126]	3D-structure; Complete proteome; Mitochondrion; Phosphoprotein; Reference proteome; Ribonucleoprotein; Ribosomal protein; Transit peptide		FALSE	33535	34
RM18_HUMAN	TRUE	0.172062	1.12667	0.0140629	MRPL18	MRPL18 HSPC071	39S ribosomal protein L18, mitochondrial	2.69064	2.72513	0.0122536	0.166159	0.155949	2.35568	20	0.0186794	0.0245363	0.0239192	180	extracellular space [GO:0005615]; mitochondrial inner membrane [GO:0005743]; mitochondrial large ribosomal subunit [GO:0005762]; mitochondrial ribosome [GO:0005761]; mitochondrion [GO:0005739]; 5S rRNA binding [GO:0008097]; structural constituent of ribosome [GO:0003735]; mitochondrial translational elongation [GO:0070125]; mitochondrial translational termination [GO:0070126]; rRNA import into mi…	extracellular space [GO:0005615]; mitochondrial inner membrane [GO:0005743]; mitochondrial large ribosomal subunit [GO:0005762]; mitochondrial ribosome [GO:0005761]; mitochondrion [GO:0005739]; 5S rRNA binding [GO:0008097]; structural constituent of ribosome [GO:0003735]; mitochondrial translational elongation [GO:0070125]; mitochondrial translational termination [GO:0070126]; rRNA import into mi…	extracellular space [GO:0005615]; mitochondrial inner membrane [GO:0005743]; mitochondrial large ribosomal subunit [GO:0005762]; mitochondrial ribosome [GO:0005761]; mitochondrion [GO:0005739]; 5S rRNA binding [GO:0008097]; structural constituent of ribosome [GO:0003735]; mitochondrial translational elongation [GO:0070125]; mitochondrial translational termination [GO:0070126]; rRNA import into mi…	3D-structure; Chaperone; Complete proteome; Mitochondrion; Polymorphism; RNA-binding; Reference proteome; Ribonucleoprotein; Ribosomal protein; Transit peptide; Transport	Together with thiosulfate sulfurtransferase (TST), acts as a mitochondrial import factor for the cytosolic 5S rRNA. The precursor form shows RNA chaperone activity; is able to fold the 5S rRNA into an import-competent conformation that is recognized by rhodanese (TST). Both the cytoplasmic and mitochondrial forms are able to bind to the helix IV-loop D in the gamma domain of the 5S rRNA. {ECO:000…	FALSE	20577	21
RM15_HUMAN	TRUE	0.148695	1.10857	0.00129718	MRPL15	MRPL15 HSPC145	39S ribosomal protein L15, mitochondrial	3.73799	3.5609	0.00171651	0.110441	0.108611	2.35568	20	0.0186794	0.00949444	0.0104623	296	mitochondrial inner membrane [GO:0005743]; mitochondrial large ribosomal subunit [GO:0005762]; mitochondrion [GO:0005739]; RNA binding [GO:0003723]; structural constituent of ribosome [GO:0003735]; mitochondrial translational elongation [GO:0070125]; mitochondrial translational termination [GO:0070126]	mitochondrial inner membrane [GO:0005743]; mitochondrial large ribosomal subunit [GO:0005762]; mitochondrion [GO:0005739]; RNA binding [GO:0003723]; structural constituent of ribosome [GO:0003735]; mitochondrial translational elongation [GO:0070125]; mitochondrial translational termination [GO:0070126]	mitochondrial inner membrane [GO:0005743]; mitochondrial large ribosomal subunit [GO:0005762]; mitochondrion [GO:0005739]; RNA binding [GO:0003723]; structural constituent of ribosome [GO:0003735]; mitochondrial translational elongation [GO:0070125]; mitochondrial translational termination [GO:0070126]	3D-structure; Complete proteome; Mitochondrion; Reference proteome; Ribonucleoprotein; Ribosomal protein; Transit peptide		FALSE	33420	33
RM12_HUMAN	TRUE	0.16852	1.12391	0.00646055	MRPL12	MRPL12 MRPL7 RPML12	39S ribosomal protein L12, mitochondrial	3.04036	3.03822	0.00596344	0.138767	0.130026	2.35568	20	0.0186794	0.0184335	0.0184594	198	mitochondrial inner membrane [GO:0005743]; mitochondrial large ribosomal subunit [GO:0005762]; mitochondrion [GO:0005739]; RNA binding [GO:0003723]; structural constituent of ribosome [GO:0003735]; mitochondrial translational elongation [GO:0070125]; mitochondrial translational termination [GO:0070126]; positive regulation of transcription, DNA-templated [GO:0045893]; transcription from mitochond…	mitochondrial inner membrane [GO:0005743]; mitochondrial large ribosomal subunit [GO:0005762]; mitochondrion [GO:0005739]; RNA binding [GO:0003723]; structural constituent of ribosome [GO:0003735]; mitochondrial translational elongation [GO:0070125]; mitochondrial translational termination [GO:0070126]; positive regulation of transcription, DNA-templated [GO:0045893]; transcription from mitochond…	mitochondrial inner membrane [GO:0005743]; mitochondrial large ribosomal subunit [GO:0005762]; mitochondrion [GO:0005739]; RNA binding [GO:0003723]; structural constituent of ribosome [GO:0003735]; mitochondrial translational elongation [GO:0070125]; mitochondrial translational termination [GO:0070126]; positive regulation of transcription, DNA-templated [GO:0045893]; transcription from mitochond…	Acetylation; Complete proteome; Mitochondrion; Polymorphism; Reference proteome; Ribonucleoprotein; Ribosomal protein; Transit peptide	Associates with mitochondrial RNA polymerase to activate transcription. {ECO:0000269|PubMed:22003127}.	FALSE	21348	21
RM11_HUMAN	TRUE	0.0901139	1.06445	0.0333371	MRPL11	MRPL11 CGI-113	39S ribosomal protein L11, mitochondrial	2.28544	2.17352	0.0406009	0.235449	0.254295	2.35568	20	0.0186794	0.00932811	0.0103135	192	mitochondrial inner membrane [GO:0005743]; mitochondrial large ribosomal subunit [GO:0005762]; mitochondrial ribosome [GO:0005761]; mitochondrion [GO:0005739]; RNA binding [GO:0003723]; rRNA binding [GO:0019843]; structural constituent of ribosome [GO:0003735]; mitochondrial translational elongation [GO:0070125]; mitochondrial translational termination [GO:0070126]; ribosomal large subunit assemb…	mitochondrial inner membrane [GO:0005743]; mitochondrial large ribosomal subunit [GO:0005762]; mitochondrial ribosome [GO:0005761]; mitochondrion [GO:0005739]; RNA binding [GO:0003723]; rRNA binding [GO:0019843]; structural constituent of ribosome [GO:0003735]; mitochondrial translational elongation [GO:0070125]; mitochondrial translational termination [GO:0070126]; ribosomal large subunit assemb…	mitochondrial inner membrane [GO:0005743]; mitochondrial large ribosomal subunit [GO:0005762]; mitochondrial ribosome [GO:0005761]; mitochondrion [GO:0005739]; RNA binding [GO:0003723]; rRNA binding [GO:0019843]; structural constituent of ribosome [GO:0003735]; mitochondrial translational elongation [GO:0070125]; mitochondrial translational termination [GO:0070126]; ribosomal large subunit assemb…	3D-structure; Alternative splicing; Complete proteome; Mitochondrion; Reference proteome; Ribonucleoprotein; Ribosomal protein; Transit peptide		FALSE	20683	21
RM09_HUMAN	TRUE	0.0920561	1.06589	0.0254347	MRPL9	MRPL9	39S ribosomal protein L9, mitochondrial	2.41495	2.28152	0.0323873	0.210314	0.230538	2.35568	20	0.0186794	0.00871845	0.00976806	267	mitochondrial inner membrane [GO:0005743]; mitochondrial large ribosomal subunit [GO:0005762]; mitochondrial ribosome [GO:0005761]; mitochondrion [GO:0005739]; RNA binding [GO:0003723]; structural constituent of ribosome [GO:0003735]; mitochondrial translational elongation [GO:0070125]; mitochondrial translational termination [GO:0070126]; translation [GO:0006412]	mitochondrial inner membrane [GO:0005743]; mitochondrial large ribosomal subunit [GO:0005762]; mitochondrial ribosome [GO:0005761]; mitochondrion [GO:0005739]; RNA binding [GO:0003723]; structural constituent of ribosome [GO:0003735]; mitochondrial translational elongation [GO:0070125]; mitochondrial translational termination [GO:0070126]; translation [GO:0006412]	mitochondrial inner membrane [GO:0005743]; mitochondrial large ribosomal subunit [GO:0005762]; mitochondrial ribosome [GO:0005761]; mitochondrion [GO:0005739]; RNA binding [GO:0003723]; structural constituent of ribosome [GO:0003735]; mitochondrial translational elongation [GO:0070125]; mitochondrial translational termination [GO:0070126]; translation [GO:0006412]	3D-structure; Complete proteome; Mitochondrion; Polymorphism; Reference proteome; Ribonucleoprotein; Ribosomal protein; Transit peptide		FALSE	30243	30
RM04_HUMAN	TRUE	0.0843278	1.06019	0.0185696	MRPL4	MRPL4 CDABP0091 CGI-28	39S ribosomal protein L4, mitochondrial	2.56252	2.34164	0.0285021	0.183082	0.218952	2.35568	20	0.0186794	0.00649766	0.00778128	311	cytosolic ribosome [GO:0022626]; mitochondrial inner membrane [GO:0005743]; mitochondrial large ribosomal subunit [GO:0005762]; RNA binding [GO:0003723]; structural constituent of ribosome [GO:0003735]; mitochondrial translational elongation [GO:0070125]; mitochondrial translational termination [GO:0070126]; translation [GO:0006412]	cytosolic ribosome [GO:0022626]; mitochondrial inner membrane [GO:0005743]; mitochondrial large ribosomal subunit [GO:0005762]; RNA binding [GO:0003723]; structural constituent of ribosome [GO:0003735]; mitochondrial translational elongation [GO:0070125]; mitochondrial translational termination [GO:0070126]; translation [GO:0006412]	cytosolic ribosome [GO:0022626]; mitochondrial inner membrane [GO:0005743]; mitochondrial large ribosomal subunit [GO:0005762]; RNA binding [GO:0003723]; structural constituent of ribosome [GO:0003735]; mitochondrial translational elongation [GO:0070125]; mitochondrial translational termination [GO:0070126]; translation [GO:0006412]	3D-structure; Alternative splicing; Complete proteome; Methylation; Mitochondrion; Reference proteome; Ribonucleoprotein; Ribosomal protein		FALSE	34919	35
RIR1_HUMAN	TRUE	0.134209	1.09749	0.0429566	RRM1	RRM1 RR1	Ribonucleoside-diphosphate reductase large subunit	2.16153	2.18379	0.0397462	0.262308	0.251494	2.35568	20	0.0186794	0.023131	0.0226619	792	cell projection [GO:0042995]; cytosol [GO:0005829]; extracellular exosome [GO:0070062]; neuronal cell body [GO:0043025]; nuclear envelope [GO:0005635]; ribonucleoside-diphosphate reductase complex [GO:0005971]; ATP binding [GO:0005524]; disordered domain specific binding [GO:0097718]; ribonucleoside-diphosphate reductase activity, thioredoxin disulfide as acceptor [GO:0004748]; cell proliferation…	cell projection [GO:0042995]; cytosol [GO:0005829]; extracellular exosome [GO:0070062]; neuronal cell body [GO:0043025]; nuclear envelope [GO:0005635]; ribonucleoside-diphosphate reductase complex [GO:0005971]; ATP binding [GO:0005524]; disordered domain specific binding [GO:0097718]; ribonucleoside-diphosphate reductase activity, thioredoxin disulfide as acceptor [GO:0004748]; cell proliferation…	cell projection [GO:0042995]; cytosol [GO:0005829]; extracellular exosome [GO:0070062]; neuronal cell body [GO:0043025]; nuclear envelope [GO:0005635]; ribonucleoside-diphosphate reductase complex [GO:0005971]; ATP binding [GO:0005524]; disordered domain specific binding [GO:0097718]; ribonucleoside-diphosphate reductase activity, thioredoxin disulfide as acceptor [GO:0004748]; cell proliferation…	3D-structure; ATP-binding; Acetylation; Allosteric enzyme; Complete proteome; Cytoplasm; DNA replication; Disulfide bond; Nucleotide-binding; Oxidoreductase; Phosphoprotein; Polymorphism; Reference proteome	Provides the precursors necessary for DNA synthesis. Catalyzes the biosynthesis of deoxyribonucleotides from the corresponding ribonucleotides.	Genetic information processing; DNA replication.	90070	90
RHG05_HUMAN	TRUE	0.749137	1.68079	0.027047	ARHGAP5	NA	NA	2.90811	3.34077	0.00960407	0.214947	0.144781	2.35568	6	0.0186794	0.132719	0.100568	NA	NA	NA	NA	NA	NA	NA	NA	NA
RHAG_HUMAN	TRUE	0.709975	1.63578	0.0279737	RHAG	NA	NA	2.8823	3.30302	0.0101738	0.216615	0.147443	2.35568	6	0.0186794	0.12135	0.0924043	NA	NA	NA	NA	NA	NA	NA	NA	NA
RFTN1_HUMAN	TRUE	0.149502	1.10919	0.0401278	RFTN1	RFTN1 KIAA0084 MIG2	Raftlin	2.19509	2.23414	0.0357836	0.256044	0.239	2.35568	20	0.0186794	0.0278316	0.0268673	578	cytoplasm [GO:0005737]; endosome [GO:0005768]; extracellular exosome [GO:0070062]; membrane raft [GO:0045121]; plasma membrane [GO:0005886]; protein complex [GO:0043234]; double-stranded RNA binding [GO:0003725]; B cell receptor signaling pathway [GO:0050853]; dsRNA transport [GO:0033227]; growth [GO:0040007]; interleukin-17 production [GO:0032620]; membrane raft assembly [GO:0001765]; protein lo…	cytoplasm [GO:0005737]; endosome [GO:0005768]; extracellular exosome [GO:0070062]; membrane raft [GO:0045121]; plasma membrane [GO:0005886]; protein complex [GO:0043234]; double-stranded RNA binding [GO:0003725]; B cell receptor signaling pathway [GO:0050853]; dsRNA transport [GO:0033227]; growth [GO:0040007]; interleukin-17 production [GO:0032620]; membrane raft assembly [GO:0001765]; protein lo…	cytoplasm [GO:0005737]; endosome [GO:0005768]; extracellular exosome [GO:0070062]; membrane raft [GO:0045121]; plasma membrane [GO:0005886]; protein complex [GO:0043234]; double-stranded RNA binding [GO:0003725]; B cell receptor signaling pathway [GO:0050853]; dsRNA transport [GO:0033227]; growth [GO:0040007]; interleukin-17 production [GO:0032620]; membrane raft assembly [GO:0001765]; protein lo…	Cell membrane; Complete proteome; Lipoprotein; Membrane; Myristate; Palmitate; Phosphoprotein; Polymorphism; Reference proteome	May play a pivotal role in the formation and/or maintenance of lipid rafts. May regulate B-cell antigen receptor-mediated signaling. {ECO:0000269|PubMed:12805216}.	FALSE	63146	63
RB22A_HUMAN	TRUE	0.232573	1.17493	0.0295915	RAB22A	NA	NA	2.44315	2.53938	0.0223718	0.223228	0.195963	2.35568	13	0.0186794	0.0362475	0.0335524	NA	NA	NA	NA	NA	NA	NA	NA	NA
RAVR1_HUMAN	TRUE	0.101288	1.07273	0.0355728	RAVER1	NA	NA	2.34474	2.11376	0.051288	0.242014	0.279921	2.35568	13	0.0186794	0.00746424	0.00918473	NA	NA	NA	NA	NA	NA	NA	NA	NA
RAP1A_HUMAN	TRUE	0.0604031	1.04276	0.026117	RAP1A	RAP1A KREV1	Ras-related protein Rap-1A	2.40239	2.02063	0.0554558	0.213243	0.286882	2.35568	20	0.0186794	0.00379299	0.00536161	184	cell junction [GO:0030054]; cytoplasm [GO:0005737]; cytosol [GO:0005829]; early endosome [GO:0005769]; extracellular exosome [GO:0070062]; guanyl-nucleotide exchange factor complex [GO:0032045]; late endosome [GO:0005770]; myelin sheath [GO:0043209]; neuron projection [GO:0043005]; perinuclear region of cytoplasm [GO:0048471]; phagocytic vesicle [GO:0045335]; plasma membrane [GO:0005886]; specifi…	cell junction [GO:0030054]; cytoplasm [GO:0005737]; cytosol [GO:0005829]; early endosome [GO:0005769]; extracellular exosome [GO:0070062]; guanyl-nucleotide exchange factor complex [GO:0032045]; late endosome [GO:0005770]; myelin sheath [GO:0043209]; neuron projection [GO:0043005]; perinuclear region of cytoplasm [GO:0048471]; phagocytic vesicle [GO:0045335]; plasma membrane [GO:0005886]; specifi…	cell junction [GO:0030054]; cytoplasm [GO:0005737]; cytosol [GO:0005829]; early endosome [GO:0005769]; extracellular exosome [GO:0070062]; guanyl-nucleotide exchange factor complex [GO:0032045]; late endosome [GO:0005770]; myelin sheath [GO:0043209]; neuron projection [GO:0043005]; perinuclear region of cytoplasm [GO:0048471]; phagocytic vesicle [GO:0045335]; plasma membrane [GO:0005886]; specifi…	3D-structure; Cell junction; Cell membrane; Complete proteome; Cytoplasm; Direct protein sequencing; Endosome; GTP-binding; Lipoprotein; Membrane; Methylation; Neurogenesis; Nucleotide-binding; Prenylation; Reference proteome; Tumor suppressor	Induces morphological reversion of a cell line transformed by a Ras oncogene. Counteracts the mitogenic function of Ras, at least partly because it can interact with Ras GAPs and RAF in a competitive manner. Together with ITGB1BP1, regulates KRIT1 localization to microtubules and membranes. Plays a role in nerve growth factor (NGF)-induced neurite outgrowth. Plays a role in the regulation of embr…	FALSE	20987	21
RABP2_HUMAN	TRUE	0.317357	1.24605	0.0278935	CRABP2	NA	NA	2.88449	2.98211	0.0167087	0.216615	0.175249	2.35568	6	0.0186794	0.0242096	0.0226505	NA	NA	NA	NA	NA	NA	NA	NA	NA
RAB5A_HUMAN	TRUE	0.0548454	1.03875	0.0160281	RAB5A	RAB5A RAB5	Ras-related protein Rab-5A	2.6306	2.04834	0.0524479	0.175039	0.282643	2.35568	20	0.0186794	0.00260809	0.00430157	215	actin cytoskeleton [GO:0015629]; axon [GO:0030424]; axon terminus [GO:0043679]; clathrin-coated vesicle membrane [GO:0030665]; cytoplasm [GO:0005737]; cytoplasmic side of early endosome membrane [GO:0098559]; cytosol [GO:0005829]; dendrite [GO:0030425]; early endosome [GO:0005769]; early endosome membrane [GO:0031901]; endocytic vesicle [GO:0030139]; endosome [GO:0005768]; endosome membrane [GO:0…	actin cytoskeleton [GO:0015629]; axon [GO:0030424]; axon terminus [GO:0043679]; clathrin-coated vesicle membrane [GO:0030665]; cytoplasm [GO:0005737]; cytoplasmic side of early endosome membrane [GO:0098559]; cytosol [GO:0005829]; dendrite [GO:0030425]; early endosome [GO:0005769]; early endosome membrane [GO:0031901]; endocytic vesicle [GO:0030139]; endosome [GO:0005768]; endosome membrane [GO:0…	actin cytoskeleton [GO:0015629]; axon [GO:0030424]; axon terminus [GO:0043679]; clathrin-coated vesicle membrane [GO:0030665]; cytoplasm [GO:0005737]; cytoplasmic side of early endosome membrane [GO:0098559]; cytosol [GO:0005829]; dendrite [GO:0030425]; early endosome [GO:0005769]; early endosome membrane [GO:0031901]; endocytic vesicle [GO:0030139]; endosome [GO:0005768]; endosome membrane [GO:0…	3D-structure; Alternative splicing; Cell membrane; Cell projection; Complete proteome; Cytoplasm; Cytoplasmic vesicle; Endocytosis; Endosome; GTP-binding; Lipoprotein; Membrane; Nucleotide-binding; Phagocytosis; Prenylation; Protein transport; Reference proteome; Transport	The small GTPases Rab are key regulators of intracellular membrane trafficking, from the formation of transport vesicles to their fusion with membranes. Rabs cycle between an inactive GDP-bound form and an active GTP-bound form that is able to recruit to membranes different sets of downstream effectors directly responsible for vesicle formation, movement, tethering and fusion. RAB5A is required f…	FALSE	23659	24
RAB24_HUMAN	TRUE	0.134498	1.09771	0.0348329	RAB24	RAB24	Ras-related protein Rab-24	2.26418	2.27835	0.0326045	0.239049	0.230593	2.35568	20	0.0186794	0.0211721	0.0209094	203	autophagosome [GO:0005776]; cytosol [GO:0005829]; mitochondrion [GO:0005739]; plasma membrane [GO:0005886]; secretory granule membrane [GO:0030667]; GTP binding [GO:0005525]; GTPase activity [GO:0003924]; autophagy [GO:0006914]; neutrophil degranulation [GO:0043312]; protein transport [GO:0015031]	autophagosome [GO:0005776]; cytosol [GO:0005829]; mitochondrion [GO:0005739]; plasma membrane [GO:0005886]; secretory granule membrane [GO:0030667]; GTP binding [GO:0005525]; GTPase activity [GO:0003924]; autophagy [GO:0006914]; neutrophil degranulation [GO:0043312]; protein transport [GO:0015031]	autophagosome [GO:0005776]; cytosol [GO:0005829]; mitochondrion [GO:0005739]; plasma membrane [GO:0005886]; secretory granule membrane [GO:0030667]; GTP binding [GO:0005525]; GTPase activity [GO:0003924]; autophagy [GO:0006914]; neutrophil degranulation [GO:0043312]; protein transport [GO:0015031]	Autophagy; Complete proteome; Cytoplasm; GTP-binding; Lipoprotein; Membrane; Nucleotide-binding; Prenylation; Protein transport; Reference proteome; Transport	May be involved in autophagy-related processes. {ECO:0000250}.	FALSE	23124	23
RAB1B_HUMAN	TRUE	0.153211	1.11204	0.0436591	RAB1B	RAB1B	Ras-related protein Rab-1B	2.15351	2.19856	0.0385444	0.263318	0.2476	2.35568	20	0.0186794	0.0303696	0.0291378	201	cytosol [GO:0005829]; endoplasmic reticulum membrane [GO:0005789]; endoplasmic reticulum-Golgi intermediate compartment [GO:0005793]; endoplasmic reticulum-Golgi intermediate compartment membrane [GO:0033116]; extracellular exosome [GO:0070062]; Golgi apparatus [GO:0005794]; Golgi membrane [GO:0000139]; mitochondrion [GO:0005739]; pre-autophagosomal structure membrane [GO:0034045]; transport vesi…	cytosol [GO:0005829]; endoplasmic reticulum membrane [GO:0005789]; endoplasmic reticulum-Golgi intermediate compartment [GO:0005793]; endoplasmic reticulum-Golgi intermediate compartment membrane [GO:0033116]; extracellular exosome [GO:0070062]; Golgi apparatus [GO:0005794]; Golgi membrane [GO:0000139]; mitochondrion [GO:0005739]; pre-autophagosomal structure membrane [GO:0034045]; transport vesi…	cytosol [GO:0005829]; endoplasmic reticulum membrane [GO:0005789]; endoplasmic reticulum-Golgi intermediate compartment [GO:0005793]; endoplasmic reticulum-Golgi intermediate compartment membrane [GO:0033116]; extracellular exosome [GO:0070062]; Golgi apparatus [GO:0005794]; Golgi membrane [GO:0000139]; mitochondrion [GO:0005739]; pre-autophagosomal structure membrane [GO:0034045]; transport vesi…	3D-structure; Acetylation; Autophagy; Complete proteome; Cytoplasm; Direct protein sequencing; GTP-binding; Lipoprotein; Membrane; Methylation; Nucleotide-binding; Phosphoprotein; Prenylation; Protein transport; Reference proteome; Transport	The small GTPases Rab are key regulators of intracellular membrane trafficking, from the formation of transport vesicles to their fusion with membranes. Rabs cycle between an inactive GDP-bound form and an active GTP-bound form that is able to recruit to membranes different set of downstream effectors directly responsible for vesicle formation, movement, tethering and fusion. RAB1B regulates vesi…	FALSE	22171	22
RAB14_HUMAN	TRUE	0.120676	1.08724	0.00382038	RAB14	RAB14	Ras-related protein Rab-14	3.27122	3.0696	0.00554129	0.123242	0.128573	2.35568	20	0.0186794	0.00816535	0.00927324	215	cytoplasmic vesicle membrane [GO:0030659]; cytosol [GO:0005829]; early endosome [GO:0005769]; early endosome membrane [GO:0031901]; extracellular exosome [GO:0070062]; Golgi membrane [GO:0000139]; Golgi stack [GO:0005795]; intracellular [GO:0005622]; intracellular membrane-bounded organelle [GO:0043231]; late endosome [GO:0005770]; lysosomal membrane [GO:0005765]; lysosome [GO:0005764]; nuclear o…	cytoplasmic vesicle membrane [GO:0030659]; cytosol [GO:0005829]; early endosome [GO:0005769]; early endosome membrane [GO:0031901]; extracellular exosome [GO:0070062]; Golgi membrane [GO:0000139]; Golgi stack [GO:0005795]; intracellular [GO:0005622]; intracellular membrane-bounded organelle [GO:0043231]; late endosome [GO:0005770]; lysosomal membrane [GO:0005765]; lysosome [GO:0005764]; nuclear o…	cytoplasmic vesicle membrane [GO:0030659]; cytosol [GO:0005829]; early endosome [GO:0005769]; early endosome membrane [GO:0031901]; extracellular exosome [GO:0070062]; Golgi membrane [GO:0000139]; Golgi stack [GO:0005795]; intracellular [GO:0005622]; intracellular membrane-bounded organelle [GO:0043231]; late endosome [GO:0005770]; lysosomal membrane [GO:0005765]; lysosome [GO:0005764]; nuclear o…	3D-structure; Acetylation; Complete proteome; Cytoplasmic vesicle; Direct protein sequencing; Endosome; GTP-binding; Golgi apparatus; Lipoprotein; Membrane; Methylation; Nucleotide-binding; Polymorphism; Prenylation; Protein transport; Reference proteome; Transport	Involved in membrane trafficking between the Golgi complex and endosomes during early embryonic development. Regulates the Golgi to endosome transport of FGFR-containing vesicles during early development, a key process for developing basement membrane and epiblast and primitive endoderm lineages during early postimplantation development. May act by modulating the kinesin KIF16B-cargo association …	FALSE	23897	24
QCR10_HUMAN	TRUE	0.380286	1.3016	0.048316	UQCR11	NA	NA	2.17909	2.33607	0.033426	0.274928	0.23306	2.35568	13	0.0186794	0.121824	0.106001	NA	NA	NA	NA	NA	NA	NA	NA	NA
PTPRA_HUMAN	TRUE	0.299488	1.23071	0.0355123	PTPRA	NA	NA	2.70135	2.79771	0.022315	0.242014	0.195963	2.35568	6	0.0186794	0.0245827	0.0229184	NA	NA	NA	NA	NA	NA	NA	NA	NA
PTPM1_HUMAN	TRUE	0.174502	1.12857	0.00276781	PTPMT1	PTPMT1 MOSP PLIP PNAS-129	Phosphatidylglycerophosphatase and protein-tyrosine phosphatase 1	3.41137	3.37776	0.0026683	0.117724	0.112849	2.35568	20	0.0186794	0.0156998	0.0160137	201	mitochondrial inner membrane [GO:0005743]; mitochondrion [GO:0005739]; nucleus [GO:0005634]; phosphatidylglycerophosphatase activity [GO:0008962]; phosphatidylinositol-4,5-bisphosphate 5-phosphatase activity [GO:0004439]; protein tyrosine phosphatase activity [GO:0004725]; protein tyrosine/serine/threonine phosphatase activity [GO:0008138]; cardiolipin biosynthetic process [GO:0032049]	mitochondrial inner membrane [GO:0005743]; mitochondrion [GO:0005739]; nucleus [GO:0005634]; phosphatidylglycerophosphatase activity [GO:0008962]; phosphatidylinositol-4,5-bisphosphate 5-phosphatase activity [GO:0004439]; protein tyrosine phosphatase activity [GO:0004725]; protein tyrosine/serine/threonine phosphatase activity [GO:0008138]; cardiolipin biosynthetic process [GO:0032049]	mitochondrial inner membrane [GO:0005743]; mitochondrion [GO:0005739]; nucleus [GO:0005634]; phosphatidylglycerophosphatase activity [GO:0008962]; phosphatidylinositol-4,5-bisphosphate 5-phosphatase activity [GO:0004439]; protein tyrosine phosphatase activity [GO:0004725]; protein tyrosine/serine/threonine phosphatase activity [GO:0008138]; cardiolipin biosynthetic process [GO:0032049]	Alternative splicing; Complete proteome; Hydrolase; Lipid biosynthesis; Lipid metabolism; Membrane; Mitochondrion; Mitochondrion inner membrane; Phospholipid biosynthesis; Phospholipid metabolism; Protein phosphatase; Reference proteome; Transit peptide	Lipid phosphatase which dephosphorylates phosphatidylglycerophosphate (PGP) to phosphatidylglycerol (PG). PGP is an essential intermediate in the biosynthetic pathway of cardiolipin, a mitochondrial-specific phospholipid regulating the membrane integrity and activities of the organelle. Has also been shown to display phosphatase activity toward phosphoprotein substrates, specifically mediates dep…	Phospholipid metabolism; phosphatidylglycerol biosynthesis; phosphatidylglycerol from CDP-diacylglycerol: step 2/2.	22844	23
PTN1_HUMAN	TRUE	0.119836	1.08661	0.00523955	PTPN1	PTPN1 PTP1B	Tyrosine-protein phosphatase non-receptor type 1	3.13282	2.96179	0.00712498	0.131969	0.132097	2.35568	20	0.0186794	0.00877923	0.00982244	435	cytoplasmic side of endoplasmic reticulum membrane [GO:0098554]; cytosol [GO:0005829]; early endosome [GO:0005769]; endoplasmic reticulum [GO:0005783]; sorting endosome [GO:0097443]; cadherin binding [GO:0045296]; enzyme binding [GO:0019899]; ephrin receptor binding [GO:0046875]; insulin receptor binding [GO:0005158]; protein kinase binding [GO:0019901]; protein phosphatase 2A binding [GO:0051721…	cytoplasmic side of endoplasmic reticulum membrane [GO:0098554]; cytosol [GO:0005829]; early endosome [GO:0005769]; endoplasmic reticulum [GO:0005783]; sorting endosome [GO:0097443]; cadherin binding [GO:0045296]; enzyme binding [GO:0019899]; ephrin receptor binding [GO:0046875]; insulin receptor binding [GO:0005158]; protein kinase binding [GO:0019901]; protein phosphatase 2A binding [GO:0051721…	cytoplasmic side of endoplasmic reticulum membrane [GO:0098554]; cytosol [GO:0005829]; early endosome [GO:0005769]; endoplasmic reticulum [GO:0005783]; sorting endosome [GO:0097443]; cadherin binding [GO:0045296]; enzyme binding [GO:0019899]; ephrin receptor binding [GO:0046875]; insulin receptor binding [GO:0005158]; protein kinase binding [GO:0019901]; protein phosphatase 2A binding [GO:0051721…	3D-structure; Acetylation; Complete proteome; Direct protein sequencing; Endoplasmic reticulum; Hydrolase; Membrane; Oxidation; Phosphoprotein; Polymorphism; Protein phosphatase; Reference proteome; S-nitrosylation	Tyrosine-protein phosphatase which acts as a regulator of endoplasmic reticulum unfolded protein response. Mediates dephosphorylation of EIF2AK3/PERK; inactivating the protein kinase activity of EIF2AK3/PERK. May play an important role in CKII- and p60c-src-induced signal transduction cascades. May regulate the EFNA5-EPHA3 signaling pathway which modulates cell reorganization and cell-cell repuls…	FALSE	49967	50
PTCD3_HUMAN	TRUE	0.0826488	1.05896	0.0264012	PTCD3	PTCD3 MRPS39 TRG15	Pentatricopeptide repeat domain-containing protein 3	2.39725	2.21567	0.037193	0.213243	0.243201	2.35568	20	0.0186794	0.00713177	0.00834858	689	cytosol [GO:0005829]; mitochondrial inner membrane [GO:0005743]; mitochondrion [GO:0005739]; nucleoplasm [GO:0005654]; plasma membrane [GO:0005886]; ribosome [GO:0005840]; ribosomal small subunit binding [GO:0043024]; RNA binding [GO:0003723]; rRNA binding [GO:0019843]; mitochondrial translation [GO:0032543]; mitochondrial translational elongation [GO:0070125]; mitochondrial translational termina…	cytosol [GO:0005829]; mitochondrial inner membrane [GO:0005743]; mitochondrion [GO:0005739]; nucleoplasm [GO:0005654]; plasma membrane [GO:0005886]; ribosome [GO:0005840]; ribosomal small subunit binding [GO:0043024]; RNA binding [GO:0003723]; rRNA binding [GO:0019843]; mitochondrial translation [GO:0032543]; mitochondrial translational elongation [GO:0070125]; mitochondrial translational termina…	cytosol [GO:0005829]; mitochondrial inner membrane [GO:0005743]; mitochondrion [GO:0005739]; nucleoplasm [GO:0005654]; plasma membrane [GO:0005886]; ribosome [GO:0005840]; ribosomal small subunit binding [GO:0043024]; RNA binding [GO:0003723]; rRNA binding [GO:0019843]; mitochondrial translation [GO:0032543]; mitochondrial translational elongation [GO:0070125]; mitochondrial translational termina…	3D-structure; Acetylation; Alternative splicing; Complete proteome; Mitochondrion; Polymorphism; RNA-binding; Reference proteome; Repeat; Ribonucleoprotein; Ribosomal protein; Transit peptide; Translation regulation; rRNA-binding	Mitochondrial RNA-binding protein that has a role in mitochondrial translation. {ECO:0000269|PubMed:19427859}.	FALSE	78550	79
PT100_HUMAN	TRUE	0.461564	1.37703	0.00217991	PET100	PET100 C19orf79	Protein PET100 homolog, mitochondrial	3.80658	4.02297	0.00105978	0.112743	0.108611	2.35568	13	0.0186794	0.0588102	0.0526539	73	integral component of mitochondrial inner membrane [GO:0031305]; unfolded protein binding [GO:0051082]; mitochondrial respiratory chain complex IV assembly [GO:0033617]	integral component of mitochondrial inner membrane [GO:0031305]; unfolded protein binding [GO:0051082]; mitochondrial respiratory chain complex IV assembly [GO:0033617]	integral component of mitochondrial inner membrane [GO:0031305]; unfolded protein binding [GO:0051082]; mitochondrial respiratory chain complex IV assembly [GO:0033617]	Complete proteome; Membrane; Mitochondrion; Reference proteome; Transit peptide; Transmembrane; Transmembrane helix		FALSE	9114	9
PSME2_HUMAN	TRUE	0.193281	1.14336	0.0349063	PSME2	PSME2	Proteasome activator complex subunit 2	2.26316	2.33476	0.0289241	0.239049	0.219124	2.35568	20	0.0186794	0.0437622	0.0411191	239	cytoplasm [GO:0005737]; cytosol [GO:0005829]; extracellular exosome [GO:0070062]; membrane [GO:0016020]; nucleoplasm [GO:0005654]; proteasome activator complex [GO:0008537]; proteasome complex [GO:0000502]; endopeptidase activator activity [GO:0061133]; identical protein binding [GO:0042802]; anaphase-promoting complex-dependent catabolic process [GO:0031145]; antigen processing and presentation …	cytoplasm [GO:0005737]; cytosol [GO:0005829]; extracellular exosome [GO:0070062]; membrane [GO:0016020]; nucleoplasm [GO:0005654]; proteasome activator complex [GO:0008537]; proteasome complex [GO:0000502]; endopeptidase activator activity [GO:0061133]; identical protein binding [GO:0042802]; anaphase-promoting complex-dependent catabolic process [GO:0031145]; antigen processing and presentation …	cytoplasm [GO:0005737]; cytosol [GO:0005829]; extracellular exosome [GO:0070062]; membrane [GO:0016020]; nucleoplasm [GO:0005654]; proteasome activator complex [GO:0008537]; proteasome complex [GO:0000502]; endopeptidase activator activity [GO:0061133]; identical protein binding [GO:0042802]; anaphase-promoting complex-dependent catabolic process [GO:0031145]; antigen processing and presentation …	Acetylation; Complete proteome; Direct protein sequencing; Phosphoprotein; Polymorphism; Proteasome; Reference proteome	Implicated in immunoproteasome assembly and required for efficient antigen processing. The PA28 activator complex enhances the generation of class I binding peptides by altering the cleavage pattern of the proteasome.	FALSE	27402	27
PREP_HUMAN	TRUE	0.148959	1.10877	0.0340419	PITRM1	PITRM1 KIAA1104 MP1	Presequence protease, mitochondrial	2.27532	2.30884	0.0305649	0.236432	0.224531	2.35568	20	0.0186794	0.0257158	0.0249744	1037	mitochondrial matrix [GO:0005759]; mitochondrion [GO:0005739]; enzyme activator activity [GO:0008047]; metal ion binding [GO:0046872]; metalloendopeptidase activity [GO:0004222]; proteolysis [GO:0006508]	mitochondrial matrix [GO:0005759]; mitochondrion [GO:0005739]; enzyme activator activity [GO:0008047]; metal ion binding [GO:0046872]; metalloendopeptidase activity [GO:0004222]; proteolysis [GO:0006508]	mitochondrial matrix [GO:0005759]; mitochondrion [GO:0005739]; enzyme activator activity [GO:0008047]; metal ion binding [GO:0046872]; metalloendopeptidase activity [GO:0004222]; proteolysis [GO:0006508]	3D-structure; Acetylation; Alternative splicing; Complete proteome; Disulfide bond; Hydrolase; Metal-binding; Metalloprotease; Mitochondrion; Polymorphism; Protease; Reference proteome; Transit peptide; Zinc	ATP-independent protease that degrades mitochondrial transit peptides after their cleavage. Also degrades other unstructured peptides. Specific for peptides in the range of 10 to 65 residues. Able to degrade amyloid beta A4 (APP) protein when it accumulates in mitochondrion, suggesting a link with Alzheimer disease. Shows a preference for cleavage after small polar residues and before basic resid…	FALSE	117413	117
PREB_HUMAN	TRUE	0.077934	1.05551	0.00359205	PREB	PREB SEC12	Prolactin regulatory element-binding protein	3.2981	2.70907	0.0127063	0.12239	0.157147	2.35568	20	0.0186794	0.00335026	0.00496553	417	endoplasmic reticulum exit site [GO:0070971]; endoplasmic reticulum membrane [GO:0005789]; Golgi membrane [GO:0000139]; integral component of endoplasmic reticulum membrane [GO:0030176]; membrane [GO:0016020]; nucleus [GO:0005634]; DNA binding [GO:0003677]; GTPase activator activity [GO:0005096]; GTPase binding [GO:0051020]; guanyl-nucleotide exchange factor activity [GO:0005085]; Sar guanyl-nucl…	endoplasmic reticulum exit site [GO:0070971]; endoplasmic reticulum membrane [GO:0005789]; Golgi membrane [GO:0000139]; integral component of endoplasmic reticulum membrane [GO:0030176]; membrane [GO:0016020]; nucleus [GO:0005634]; DNA binding [GO:0003677]; GTPase activator activity [GO:0005096]; GTPase binding [GO:0051020]; guanyl-nucleotide exchange factor activity [GO:0005085]; Sar guanyl-nucl…	endoplasmic reticulum exit site [GO:0070971]; endoplasmic reticulum membrane [GO:0005789]; Golgi membrane [GO:0000139]; integral component of endoplasmic reticulum membrane [GO:0030176]; membrane [GO:0016020]; nucleus [GO:0005634]; DNA binding [GO:0003677]; GTPase activator activity [GO:0005096]; GTPase binding [GO:0051020]; guanyl-nucleotide exchange factor activity [GO:0005085]; Sar guanyl-nucl…	3D-structure; Activator; Complete proteome; DNA-binding; ER-Golgi transport; Endoplasmic reticulum; Membrane; Nitration; Nucleus; Protein transport; Reference proteome; Repeat; Transcription; Transcription regulation; Transmembrane; Transmembrane helix; Transport; WD repeat	Guanine nucleotide exchange factor that specifically activates the small GTPase SAR1B. Mediates the recruitement of SAR1B and other COPII coat components to endoplasmic reticulum membranes and is therefore required for the formation of COPII transport vesicles from the ER. {ECO:0000250|UniProtKB:Q9WTV0, ECO:0000250|UniProtKB:Q9WUQ2}.; Was first identified based on its probable role in the regulat…	FALSE	45468	45
PRDX5_HUMAN	TRUE	0.146847	1.10715	0.0121794	PRDX5	PRDX5 ACR1 SBBI10	Peroxiredoxin-5, mitochondrial	2.75619	2.74224	0.0117882	0.157159	0.155949	2.35568	20	0.0186794	0.0170319	0.0172055	214	cytoplasm [GO:0005737]; cytoplasmic vesicle [GO:0031410]; cytosol [GO:0005829]; extracellular exosome [GO:0070062]; extracellular space [GO:0005615]; intracellular membrane-bounded organelle [GO:0043231]; mitochondrial matrix [GO:0005759]; mitochondrion [GO:0005739]; nucleus [GO:0005634]; perinuclear region of cytoplasm [GO:0048471]; peroxisomal matrix [GO:0005782]; peroxisome [GO:0005777]; antio…	cytoplasm [GO:0005737]; cytoplasmic vesicle [GO:0031410]; cytosol [GO:0005829]; extracellular exosome [GO:0070062]; extracellular space [GO:0005615]; intracellular membrane-bounded organelle [GO:0043231]; mitochondrial matrix [GO:0005759]; mitochondrion [GO:0005739]; nucleus [GO:0005634]; perinuclear region of cytoplasm [GO:0048471]; peroxisomal matrix [GO:0005782]; peroxisome [GO:0005777]; antio…	cytoplasm [GO:0005737]; cytoplasmic vesicle [GO:0031410]; cytosol [GO:0005829]; extracellular exosome [GO:0070062]; extracellular space [GO:0005615]; intracellular membrane-bounded organelle [GO:0043231]; mitochondrial matrix [GO:0005759]; mitochondrion [GO:0005739]; nucleus [GO:0005634]; perinuclear region of cytoplasm [GO:0048471]; peroxisomal matrix [GO:0005782]; peroxisome [GO:0005777]; antio…	3D-structure; Acetylation; Alternative initiation; Alternative splicing; Antioxidant; Complete proteome; Cytoplasm; Direct protein sequencing; Disulfide bond; Mitochondrion; Oxidoreductase; Peroxidase; Peroxisome; Phosphoprotein; Polymorphism; Redox-active center; Reference proteome; Transit peptide	Reduces hydrogen peroxide and alkyl hydroperoxides with reducing equivalents provided through the thioredoxin system. Involved in intracellular redox signaling.	FALSE	22086	22
PPTC7_HUMAN	TRUE	0.195287	1.14495	0.0177111	PPTC7	PPTC7 TAPP2C	Protein phosphatase PTC7 homolog	2.58448	2.64872	0.0145517	0.179802	0.163429	2.35568	20	0.0186794	0.0342572	0.0326157	304	mitochondrion [GO:0005739]; metal ion binding [GO:0046872]; phosphoprotein phosphatase activity [GO:0004721]	mitochondrion [GO:0005739]; metal ion binding [GO:0046872]; phosphoprotein phosphatase activity [GO:0004721]	mitochondrion [GO:0005739]; metal ion binding [GO:0046872]; phosphoprotein phosphatase activity [GO:0004721]	Complete proteome; Hydrolase; Magnesium; Manganese; Metal-binding; Protein phosphatase; Reference proteome		FALSE	32646	33
PPT1_HUMAN	TRUE	0.192944	1.14309	0.00113924	PPT1	PPT1 CLN1 PPT	Palmitoyl-protein thioesterase 1	3.79367	3.75362	0.00107466	0.110441	0.108611	2.35568	20	0.0186794	0.0155201	0.015853	306	axon [GO:0030424]; cytosol [GO:0005829]; dendrite [GO:0030425]; extracellular exosome [GO:0070062]; extracellular region [GO:0005576]; extracellular space [GO:0005615]; Golgi apparatus [GO:0005794]; lysosomal lumen [GO:0043202]; lysosome [GO:0005764]; membrane [GO:0016020]; membrane raft [GO:0045121]; neuronal cell body [GO:0043025]; nucleus [GO:0005634]; synaptic vesicle [GO:0008021]; palmitoyl-…	axon [GO:0030424]; cytosol [GO:0005829]; dendrite [GO:0030425]; extracellular exosome [GO:0070062]; extracellular region [GO:0005576]; extracellular space [GO:0005615]; Golgi apparatus [GO:0005794]; lysosomal lumen [GO:0043202]; lysosome [GO:0005764]; membrane [GO:0016020]; membrane raft [GO:0045121]; neuronal cell body [GO:0043025]; nucleus [GO:0005634]; synaptic vesicle [GO:0008021]; palmitoyl-…	axon [GO:0030424]; cytosol [GO:0005829]; dendrite [GO:0030425]; extracellular exosome [GO:0070062]; extracellular region [GO:0005576]; extracellular space [GO:0005615]; Golgi apparatus [GO:0005794]; lysosomal lumen [GO:0043202]; lysosome [GO:0005764]; membrane [GO:0016020]; membrane raft [GO:0045121]; neuronal cell body [GO:0043025]; nucleus [GO:0005634]; synaptic vesicle [GO:0008021]; palmitoyl-…	3D-structure; Alternative splicing; Complete proteome; Disease mutation; Disulfide bond; Glycoprotein; Hydrolase; Lysosome; Neurodegeneration; Neuronal ceroid lipofuscinosis; Polymorphism; Reference proteome; Secreted; Sensory transduction; Signal; Vision	Removes thioester-linked fatty acyl groups such as palmitate from modified cysteine residues in proteins or peptides during lysosomal degradation. Prefers acyl chain lengths of 14 to 18 carbons (PubMed:8816748). {ECO:0000269|PubMed:8816748}.	FALSE	34193	34
PNO1_HUMAN	TRUE	0.405589	1.32463	0.019438	PNO1	NA	NA	3.16514	3.37707	0.00908779	0.184356	0.141431	2.35568	6	0.0186794	0.032841	0.0288485	NA	NA	NA	NA	NA	NA	NA	NA	NA
PLPP3_HUMAN	TRUE	0.216463	1.16188	0.0387894	PLPP3	NA	NA	2.29818	2.38651	0.0302808	0.251876	0.224026	2.35568	13	0.0186794	0.0354863	0.032908	NA	NA	NA	NA	NA	NA	NA	NA	NA
PLPL8_HUMAN	TRUE	0.340258	1.26598	0.0134811	PNPLA8	NA	NA	3.45916	3.47621	0.00782099	0.163974	0.132983	2.35568	6	0.0186794	0.0193511	0.0191618	NA	NA	NA	NA	NA	NA	NA	NA	NA
PLIN2_HUMAN	TRUE	0.214227	1.16008	0.0415821	PLIN2	PLIN2 ADFP	Perilipin-2	2.17758	2.25984	0.0339031	0.258857	0.23306	2.35568	20	0.0186794	0.0580698	0.0539192	437	cytosol [GO:0005829]; endoplasmic reticulum [GO:0005783]; extracellular region [GO:0005576]; lipid particle [GO:0005811]; nucleus [GO:0005634]; plasma membrane [GO:0005886]; lipid storage [GO:0019915]; long-chain fatty acid transport [GO:0015909]; response to drug [GO:0042493]; response to organic cyclic compound [GO:0014070]	cytosol [GO:0005829]; endoplasmic reticulum [GO:0005783]; extracellular region [GO:0005576]; lipid particle [GO:0005811]; nucleus [GO:0005634]; plasma membrane [GO:0005886]; lipid storage [GO:0019915]; long-chain fatty acid transport [GO:0015909]; response to drug [GO:0042493]; response to organic cyclic compound [GO:0014070]	cytosol [GO:0005829]; endoplasmic reticulum [GO:0005783]; extracellular region [GO:0005576]; lipid particle [GO:0005811]; nucleus [GO:0005634]; plasma membrane [GO:0005886]; lipid storage [GO:0019915]; long-chain fatty acid transport [GO:0015909]; response to drug [GO:0042493]; response to organic cyclic compound [GO:0014070]	Acetylation; Complete proteome; Lipoprotein; Membrane; Phosphoprotein; Polymorphism; Reference proteome	May be involved in development and maintenance of adipose tissue. {ECO:0000250}.	FALSE	48075	48
PISD_HUMAN	TRUE	0.283454	1.21711	0.00312565	PISD	PISD	Phosphatidylserine decarboxylase proenzyme, mitochondrial	3.35861	3.46288	0.0021748	0.122032	0.111706	2.35568	20	0.0186794	0.0427365	0.0402015	409	integral component of membrane [GO:0016021]; mitochondrial inner membrane [GO:0005743]; nucleus [GO:0005634]; phosphatidylserine decarboxylase activity [GO:0004609]; phospholipid biosynthetic process [GO:0008654]	integral component of membrane [GO:0016021]; mitochondrial inner membrane [GO:0005743]; nucleus [GO:0005634]; phosphatidylserine decarboxylase activity [GO:0004609]; phospholipid biosynthetic process [GO:0008654]	integral component of membrane [GO:0016021]; mitochondrial inner membrane [GO:0005743]; nucleus [GO:0005634]; phosphatidylserine decarboxylase activity [GO:0004609]; phospholipid biosynthetic process [GO:0008654]	Alternative splicing; Complete proteome; Decarboxylase; Lipid biosynthesis; Lipid metabolism; Lyase; Membrane; Mitochondrion; Mitochondrion inner membrane; Phospholipid biosynthesis; Phospholipid metabolism; Pyruvate; Reference proteome; Transit peptide; Transmembrane; Transmembrane helix; Zymogen	Catalyzes the formation of phosphatidylethanolamine (PtdEtn) from phosphatidylserine (PtdSer). Plays a central role in phospholipid metabolism and in the interorganelle trafficking of phosphatidylserine. {ECO:0000255|HAMAP-Rule:MF_03208}.	FALSE	46672	47
PHB2_HUMAN	TRUE	0.137372	1.0999	0.0121149	PHB2	PHB2 BAP REA	Prohibitin-2	2.7586	2.7222	0.0123349	0.157154	0.155949	2.35568	20	0.0186794	0.0148788	0.0152793	299	cell periphery [GO:0071944]; cell surface [GO:0009986]; cytoplasm [GO:0005737]; extracellular exosome [GO:0070062]; mitochondrial inner membrane [GO:0005743]; mitochondrial outer membrane [GO:0005741]; mitochondrion [GO:0005739]; nuclear matrix [GO:0016363]; nucleus [GO:0005634]; protein complex [GO:0043234]; amide binding [GO:0033218]; estrogen receptor binding [GO:0030331]; protein C-terminus b…	cell periphery [GO:0071944]; cell surface [GO:0009986]; cytoplasm [GO:0005737]; extracellular exosome [GO:0070062]; mitochondrial inner membrane [GO:0005743]; mitochondrial outer membrane [GO:0005741]; mitochondrion [GO:0005739]; nuclear matrix [GO:0016363]; nucleus [GO:0005634]; protein complex [GO:0043234]; amide binding [GO:0033218]; estrogen receptor binding [GO:0030331]; protein C-terminus b…	cell periphery [GO:0071944]; cell surface [GO:0009986]; cytoplasm [GO:0005737]; extracellular exosome [GO:0070062]; mitochondrial inner membrane [GO:0005743]; mitochondrial outer membrane [GO:0005741]; mitochondrion [GO:0005739]; nuclear matrix [GO:0016363]; nucleus [GO:0005634]; protein complex [GO:0043234]; amide binding [GO:0033218]; estrogen receptor binding [GO:0030331]; protein C-terminus b…	Acetylation; Alternative splicing; Coiled coil; Complete proteome; Cytoplasm; Direct protein sequencing; Membrane; Mitochondrion; Mitochondrion inner membrane; Nucleus; Phosphoprotein; Receptor; Reference proteome; Repressor; Transcription; Transcription regulation	Acts as a mediator of transcriptional repression by nuclear hormone receptors via recruitment of histone deacetylases (By similarity). Functions as an estrogen receptor (ER)-selective coregulator that potentiates the inhibitory activities of antiestrogens and represses the activity of estrogens. Competes with NCOA1 for modulation of ER transcriptional activity. Probably involved in regulating mit…	FALSE	33296	33
PERM1_HUMAN	TRUE	0.115705	1.0835	0.0157111	PERM1	PERM1 C1orf170	PGC-1 and ERR-induced regulator in muscle protein 1	2.6398	2.55751	0.0178249	0.173119	0.179143	2.35568	20	0.0186794	0.0115269	0.0122806	790	cytoplasm [GO:0005737]; nucleus [GO:0005634]; regulation of transcription, DNA-templated [GO:0006355]; response to muscle activity [GO:0014850]; transcription, DNA-templated [GO:0006351]	cytoplasm [GO:0005737]; nucleus [GO:0005634]; regulation of transcription, DNA-templated [GO:0006355]; response to muscle activity [GO:0014850]; transcription, DNA-templated [GO:0006351]	cytoplasm [GO:0005737]; nucleus [GO:0005634]; regulation of transcription, DNA-templated [GO:0006355]; response to muscle activity [GO:0014850]; transcription, DNA-templated [GO:0006351]	Alternative splicing; Complete proteome; Cytoplasm; Nucleus; Reference proteome; Transcription; Transcription regulation	Regulates the expression of selective PPARGC1A/B and ESRRA/B/G target genes with roles in glucose and lipid metabolism, energy transfer, contractile function, muscle mitochondrial biogenesis and oxidative capacity. Required for the efficient induction of MT-CO2, MT-CO3, COX4I1, TFB1M, TFB2M, POLRMT and SIRT3 by PPARGC1A. Positively regulates the PPARGC1A/ESRRG-induced expression of CKMT2, TNNI3 a…	FALSE	81351	81
PDLI4_HUMAN	TRUE	0.250394	1.18953	0.0364236	PDLIM4	NA	NA	2.68232	2.65558	0.0279334	0.243655	0.217957	2.35568	6	0.0186794	0.0174284	0.0177811	NA	NA	NA	NA	NA	NA	NA	NA	NA
PDC10_HUMAN	TRUE	0.120396	1.08703	0.0228485	PDCD10	PDCD10 CCM3 TFAR15	Programmed cell death protein 10	2.46559	2.42682	0.0237287	0.19935	0.201963	2.35568	20	0.0186794	0.0143066	0.0147673	212	cytoplasm [GO:0005737]; cytosol [GO:0005829]; extracellular exosome [GO:0070062]; Golgi apparatus [GO:0005794]; Golgi membrane [GO:0000139]; plasma membrane [GO:0005886]; protein homodimerization activity [GO:0042803]; protein kinase binding [GO:0019901]; protein N-terminus binding [GO:0047485]; angiogenesis [GO:0001525]; establishment of Golgi localization [GO:0051683]; Golgi reassembly [GO:0090…	cytoplasm [GO:0005737]; cytosol [GO:0005829]; extracellular exosome [GO:0070062]; Golgi apparatus [GO:0005794]; Golgi membrane [GO:0000139]; plasma membrane [GO:0005886]; protein homodimerization activity [GO:0042803]; protein kinase binding [GO:0019901]; protein N-terminus binding [GO:0047485]; angiogenesis [GO:0001525]; establishment of Golgi localization [GO:0051683]; Golgi reassembly [GO:0090…	cytoplasm [GO:0005737]; cytosol [GO:0005829]; extracellular exosome [GO:0070062]; Golgi apparatus [GO:0005794]; Golgi membrane [GO:0000139]; plasma membrane [GO:0005886]; protein homodimerization activity [GO:0042803]; protein kinase binding [GO:0019901]; protein N-terminus binding [GO:0047485]; angiogenesis [GO:0001525]; establishment of Golgi localization [GO:0051683]; Golgi reassembly [GO:0090…	3D-structure; Acetylation; Angiogenesis; Apoptosis; Cell membrane; Complete proteome; Cytoplasm; Direct protein sequencing; Golgi apparatus; Membrane; Polymorphism; Reference proteome	Promotes cell proliferation. Modulates apoptotic pathways. Increases mitogen-activated protein kinase activity and STK26 activity (PubMed:27807006). Important for cell migration, and for normal structure and assembly of the Golgi complex (PubMed:27807006). Important for KDR/VEGFR2 signaling. Increases the stability of KDR/VEGFR2 and prevents its breakdown. Required for normal cardiovascular devel…	FALSE	24702	25
PAPS2_HUMAN	TRUE	0.215119	1.1608	0.0154506	PAPSS2	NA	NA	2.78557	2.83312	0.0123665	0.171581	0.155949	2.35568	13	0.0186794	0.0238556	0.0230616	NA	NA	NA	NA	NA	NA	NA	NA	NA
PAPS1_HUMAN	TRUE	0.158863	1.11641	0.0150605	PAPSS1	NA	NA	3.36903	2.44268	0.0391648	0.169998	0.249456	2.35568	6	0.0186794	0.00444697	0.00845946	NA	NA	NA	NA	NA	NA	NA	NA	NA
PAPD1_HUMAN	TRUE	0.109666	1.07898	0.0374749	MTPAP	MTPAP PAPD1	Poly	2.22859	2.19579	0.0387673	0.24818	0.2476	2.35568	20	0.0186794	0.0145291	0.0149664	582	intracellular membrane-bounded organelle [GO:0043231]; mitochondrion [GO:0005739]; ATP binding [GO:0005524]; identical protein binding [GO:0042802]; magnesium ion binding [GO:0000287]; manganese ion binding [GO:0030145]; polynucleotide adenylyltransferase activity [GO:0004652]; protein homodimerization activity [GO:0042803]; RNA binding [GO:0003723]; UTP binding [GO:0002134]; histone mRNA catabol…	intracellular membrane-bounded organelle [GO:0043231]; mitochondrion [GO:0005739]; ATP binding [GO:0005524]; identical protein binding [GO:0042802]; magnesium ion binding [GO:0000287]; manganese ion binding [GO:0030145]; polynucleotide adenylyltransferase activity [GO:0004652]; protein homodimerization activity [GO:0042803]; RNA binding [GO:0003723]; UTP binding [GO:0002134]; histone mRNA catabol…	intracellular membrane-bounded organelle [GO:0043231]; mitochondrion [GO:0005739]; ATP binding [GO:0005524]; identical protein binding [GO:0042802]; magnesium ion binding [GO:0000287]; manganese ion binding [GO:0030145]; polynucleotide adenylyltransferase activity [GO:0004652]; protein homodimerization activity [GO:0042803]; RNA binding [GO:0003723]; UTP binding [GO:0002134]; histone mRNA catabol…	3D-structure; ATP-binding; Acetylation; Alternative splicing; Complete proteome; Cytoplasm; Disease mutation; Magnesium; Manganese; Metal-binding; Mitochondrion; Neurodegeneration; Nucleotide-binding; Nucleotidyltransferase; Polymorphism; RNA-binding; Reference proteome; Transcription; Transferase; Transit peptide; mRNA processing	Polymerase that creates the 3' poly(A) tail of mitochondrial transcripts. Can use all four nucleotides, but has higher activity with ATP and UTP (in vitro). Plays a role in replication-dependent histone mRNA degradation. May be involved in the terminal uridylation of mature histone mRNAs before their degradation is initiated. Might be responsible for the creation of some UAA stop codons which are…	FALSE	66172	66
PACS1_HUMAN	TRUE	0.191481	1.14194	0.0169411	PACS1	PACS1 KIAA1175	Phosphofurin acidic cluster sorting protein 1	2.60504	2.66523	0.0140231	0.17674	0.162496	2.35568	20	0.0186794	0.0324169	0.0309694	963	COPI-coated vesicle [GO:0030137]; cytosol [GO:0005829]; ion channel binding [GO:0044325]; protein targeting to Golgi [GO:0000042]; protein targeting to plasma membrane [GO:0072661]; regulation of defense response to virus by virus [GO:0050690]; viral process [GO:0016032]	COPI-coated vesicle [GO:0030137]; cytosol [GO:0005829]; ion channel binding [GO:0044325]; protein targeting to Golgi [GO:0000042]; protein targeting to plasma membrane [GO:0072661]; regulation of defense response to virus by virus [GO:0050690]; viral process [GO:0016032]	COPI-coated vesicle [GO:0030137]; cytosol [GO:0005829]; ion channel binding [GO:0044325]; protein targeting to Golgi [GO:0000042]; protein targeting to plasma membrane [GO:0072661]; regulation of defense response to virus by virus [GO:0050690]; viral process [GO:0016032]	Acetylation; Alternative splicing; Coiled coil; Complete proteome; Disease mutation; Golgi apparatus; Host-virus interaction; Mental retardation; Phosphoprotein; Polymorphism; Reference proteome	Coat protein that is involved in the localization of trans-Golgi network (TGN) membrane proteins that contain acidic cluster sorting motifs. Controls the endosome-to-Golgi trafficking of furin and mannose-6-phosphate receptor by connecting the acidic-cluster-containing cytoplasmic domain of these molecules with the adapter-protein complex-1 (AP-1) of endosomal clathrin-coated membrane pits. Invol…	FALSE	104898	105
P5CS_HUMAN	TRUE	0.291602	1.224	0.0175736	ALDH18A1	NA	NA	3.24512	3.17574	0.0123706	0.179039	0.155949	2.35568	6	0.0186794	0.0161492	0.0168625	NA	NA	NA	NA	NA	NA	NA	NA	NA
OPTN_HUMAN	TRUE	0.156408	1.11451	0.00695315	OPTN	OPTN FIP2 GLC1E HIP7 HYPL NRP	Optineurin	3.00777	2.98408	0.00676554	0.138863	0.131675	2.35568	20	0.0186794	0.0162247	0.0164834	577	autophagosome [GO:0005776]; cytoplasm [GO:0005737]; cytoplasmic vesicle [GO:0031410]; cytosol [GO:0005829]; Golgi apparatus [GO:0005794]; Golgi membrane [GO:0000139]; nucleoplasm [GO:0005654]; nucleus [GO:0005634]; perinuclear region of cytoplasm [GO:0048471]; recycling endosome membrane [GO:0055038]; trans-Golgi network [GO:0005802]; identical protein binding [GO:0042802]; K63-linked polyubiquit…	autophagosome [GO:0005776]; cytoplasm [GO:0005737]; cytoplasmic vesicle [GO:0031410]; cytosol [GO:0005829]; Golgi apparatus [GO:0005794]; Golgi membrane [GO:0000139]; nucleoplasm [GO:0005654]; nucleus [GO:0005634]; perinuclear region of cytoplasm [GO:0048471]; recycling endosome membrane [GO:0055038]; trans-Golgi network [GO:0005802]; identical protein binding [GO:0042802]; K63-linked polyubiquit…	autophagosome [GO:0005776]; cytoplasm [GO:0005737]; cytoplasmic vesicle [GO:0031410]; cytosol [GO:0005829]; Golgi apparatus [GO:0005794]; Golgi membrane [GO:0000139]; nucleoplasm [GO:0005654]; nucleus [GO:0005634]; perinuclear region of cytoplasm [GO:0048471]; recycling endosome membrane [GO:0055038]; trans-Golgi network [GO:0005802]; identical protein binding [GO:0042802]; K63-linked polyubiquit…	3D-structure; Alternative splicing; Amyotrophic lateral sclerosis; Autophagy; Coiled coil; Complete proteome; Cytoplasm; Cytoplasmic vesicle; Disease mutation; Endosome; Glaucoma; Golgi apparatus; Metal-binding; Neurodegeneration; Phosphoprotein; Polymorphism; Reference proteome; Zinc; Zinc-finger	Plays an important role in the maintenance of the Golgi complex, in membrane trafficking, in exocytosis, through its interaction with myosin VI and Rab8 (PubMed:27534431). Links myosin VI to the Golgi complex and plays an important role in Golgi ribbon formation (PubMed:27534431). Negatively regulates the induction of IFNB in response to RNA virus infection. Plays a neuroprotective role in the ey…	FALSE	65921	66
OPA1_HUMAN	TRUE	0.109002	1.07848	0.0181385	OPA1	OPA1 KIAA0567	Dynamin-like 120 kDa protein, mitochondrial	2.57343	2.47918	0.0211735	0.181882	0.193209	2.35568	20	0.0186794	0.0107646	0.0115986	960	axon cytoplasm [GO:1904115]; cytosol [GO:0005829]; dendrite [GO:0030425]; extrinsic component of mitochondrial inner membrane [GO:0031314]; integral component of membrane [GO:0016021]; membrane [GO:0016020]; mitochondrial crista [GO:0030061]; mitochondrial inner membrane [GO:0005743]; mitochondrial intermembrane space [GO:0005758]; mitochondrial outer membrane [GO:0005741]; mitochondrion [GO:0005…	axon cytoplasm [GO:1904115]; cytosol [GO:0005829]; dendrite [GO:0030425]; extrinsic component of mitochondrial inner membrane [GO:0031314]; integral component of membrane [GO:0016021]; membrane [GO:0016020]; mitochondrial crista [GO:0030061]; mitochondrial inner membrane [GO:0005743]; mitochondrial intermembrane space [GO:0005758]; mitochondrial outer membrane [GO:0005741]; mitochondrion [GO:0005…	axon cytoplasm [GO:1904115]; cytosol [GO:0005829]; dendrite [GO:0030425]; extrinsic component of mitochondrial inner membrane [GO:0031314]; integral component of membrane [GO:0016021]; membrane [GO:0016020]; mitochondrial crista [GO:0030061]; mitochondrial inner membrane [GO:0005743]; mitochondrial intermembrane space [GO:0005758]; mitochondrial outer membrane [GO:0005741]; mitochondrion [GO:0005…	Acetylation; Alternative splicing; Apoptosis; Cardiomyopathy; Coiled coil; Complete proteome; Deafness; Disease mutation; GTP-binding; Hydrolase; Membrane; Mitochondrion; Mitochondrion inner membrane; Neurodegeneration; Nucleotide-binding; Polymorphism; Primary mitochondrial disease; Reference proteome; Sensory transduction; Transit peptide; Transmembrane; Transmembrane helix; Vision	Dynamin-related GTPase required for mitochondrial fusion and regulation of apoptosis. May form a diffusion barrier for proteins stored in mitochondrial cristae. Proteolytic processing in response to intrinsic apoptotic signals may lead to disassembly of OPA1 oligomers and release of the caspase activator cytochrome C (CYCS) into the mitochondrial intermembrane space. May also play a role in mitoc…	FALSE	111631	112
OMA1_HUMAN	TRUE	0.164171	1.12052	0.0388854	OMA1	OMA1 MPRP1	Metalloendopeptidase OMA1, mitochondrial	2.21052	2.26306	0.0336736	0.251876	0.23306	2.35568	20	0.0186794	0.0330945	0.0315756	524	integral component of membrane [GO:0016021]; mitochondrial inner membrane [GO:0005743]; mitochondrial membrane [GO:0031966]; metal ion binding [GO:0046872]; metalloendopeptidase activity [GO:0004222]; cristae formation [GO:0042407]; diet induced thermogenesis [GO:0002024]; energy homeostasis [GO:0097009]; glucose metabolic process [GO:0006006]; lipid metabolic process [GO:0006629]; misfolded or i…	integral component of membrane [GO:0016021]; mitochondrial inner membrane [GO:0005743]; mitochondrial membrane [GO:0031966]; metal ion binding [GO:0046872]; metalloendopeptidase activity [GO:0004222]; cristae formation [GO:0042407]; diet induced thermogenesis [GO:0002024]; energy homeostasis [GO:0097009]; glucose metabolic process [GO:0006006]; lipid metabolic process [GO:0006629]; misfolded or i…	integral component of membrane [GO:0016021]; mitochondrial inner membrane [GO:0005743]; mitochondrial membrane [GO:0031966]; metal ion binding [GO:0046872]; metalloendopeptidase activity [GO:0004222]; cristae formation [GO:0042407]; diet induced thermogenesis [GO:0002024]; energy homeostasis [GO:0097009]; glucose metabolic process [GO:0006006]; lipid metabolic process [GO:0006629]; misfolded or i…	Alternative splicing; Complete proteome; Hydrolase; Membrane; Metal-binding; Metalloprotease; Mitochondrion; Mitochondrion inner membrane; Polymorphism; Protease; Reference proteome; Transit peptide; Transmembrane; Transmembrane helix; Zinc	Metalloprotease that is part of the quality control system in the inner membrane of mitochondria. Following stress conditions that induce loss of mitochondrial membrane potential, mediates cleavage of OPA1 at S1 position, leading to OPA1 inactivation and negative regulation of mitochondrial fusion. May also cleave UQCC3 under these conditions. Its role in mitochondrial quality control is essentia…	FALSE	60120	60
NUDT6_HUMAN	TRUE	0.200917	1.14943	0.0472644	NUDT6	NA	NA	2.11409	2.1911	0.0391472	0.272583	0.249456	2.35568	20	0.0186794	0.054192	0.05045	NA	NA	NA	NA	NA	NA	NA	NA	NA
NUCG_HUMAN	TRUE	0.156994	1.11496	0.0138306	ENDOG	ENDOG	Endonuclease G, mitochondrial	2.69826	2.70976	0.0126865	0.165005	0.157147	2.35568	20	0.0186794	0.0203119	0.0201399	297	cytosol [GO:0005829]; mitochondrion [GO:0005739]; nucleus [GO:0005634]; perikaryon [GO:0043204]; deoxyribonuclease activity [GO:0004536]; endonuclease activity [GO:0004519]; metal ion binding [GO:0046872]; nucleic acid binding [GO:0003676]; aging [GO:0007568]; apoptotic DNA fragmentation [GO:0006309]; cellular response to calcium ion [GO:0071277]; cellular response to glucose stimulus [GO:0071333…	cytosol [GO:0005829]; mitochondrion [GO:0005739]; nucleus [GO:0005634]; perikaryon [GO:0043204]; deoxyribonuclease activity [GO:0004536]; endonuclease activity [GO:0004519]; metal ion binding [GO:0046872]; nucleic acid binding [GO:0003676]; aging [GO:0007568]; apoptotic DNA fragmentation [GO:0006309]; cellular response to calcium ion [GO:0071277]; cellular response to glucose stimulus [GO:0071333…	cytosol [GO:0005829]; mitochondrion [GO:0005739]; nucleus [GO:0005634]; perikaryon [GO:0043204]; deoxyribonuclease activity [GO:0004536]; endonuclease activity [GO:0004519]; metal ion binding [GO:0046872]; nucleic acid binding [GO:0003676]; aging [GO:0007568]; apoptotic DNA fragmentation [GO:0006309]; cellular response to calcium ion [GO:0071277]; cellular response to glucose stimulus [GO:0071333…	Complete proteome; Endonuclease; Hydrolase; Magnesium; Manganese; Metal-binding; Mitochondrion; Nuclease; Polymorphism; Reference proteome; Transit peptide	Cleaves DNA at double-stranded (DG)n.(DC)n and at single-stranded (DC)n tracts. In addition to deoxyribonuclease activities, also has ribonuclease (RNase) and RNase H activities. Capable of generating the RNA primers required by DNA polymerase gamma to initiate replication of mitochondrial DNA (By similarity). {ECO:0000250}.	FALSE	32620	33
NU3M_HUMAN	TRUE	0.222848	1.16704	0.0146733	MT-ND3	NA	NA	2.67118	2.75254	0.0115163	0.169052	0.154265	2.35568	20	0.0186794	0.0417601	0.039328	NA	NA	NA	NA	NA	NA	NA	NA	NA
NU2M_HUMAN	TRUE	0.393222	1.31332	0.0115297	MT-ND2	NA	NA	2.78105	2.91368	0.00796423	0.156233	0.132983	2.35568	20	0.0186794	0.119952	0.109281	NA	NA	NA	NA	NA	NA	NA	NA	NA
NT5D3_HUMAN	TRUE	0.352655	1.27691	0.00213812	NT5DC3	NT5DC3 GNN TU12B1-TY	5'-nucleotidase domain-containing protein 3	3.523	3.65837	0.00135513	0.112743	0.108611	2.35568	20	0.0186794	0.0601208	0.055754	548	receptor complex [GO:0043235]; 5'-nucleotidase activity [GO:0008253]; metal ion binding [GO:0046872]	receptor complex [GO:0043235]; 5'-nucleotidase activity [GO:0008253]; metal ion binding [GO:0046872]	receptor complex [GO:0043235]; 5'-nucleotidase activity [GO:0008253]; metal ion binding [GO:0046872]	Alternative splicing; Complete proteome; Hydrolase; Magnesium; Metal-binding; Polymorphism; Reference proteome		FALSE	63420	63
NPS3B_HUMAN	TRUE	0.224469	1.16835	0.00813568	NIPSNAP3B	NIPSNAP3B NIPSNAP3	Protein NipSnap homolog 3B	2.93784	3.01286	0.00632704	0.14131	0.130026	2.35568	20	0.0186794	0.0350274	0.0333048	247	mitochondrion [GO:0005739]	mitochondrion [GO:0005739]	mitochondrion [GO:0005739]	Complete proteome; Polymorphism; Reference proteome		FALSE	28313	28
NPS3A_HUMAN	TRUE	0.251468	1.19042	0.00109052	NIPSNAP3A	NIPSNAP3A NIPSNAP4 HSPC299	Protein NipSnap homolog 3A	3.8124	3.87085	0.000807038	0.110441	0.105421	2.35568	20	0.0186794	0.0261048	0.0253224	247	cytosol [GO:0005829]; mitochondrion [GO:0005739]; nucleus [GO:0005634]	cytosol [GO:0005829]; mitochondrion [GO:0005739]; nucleus [GO:0005634]	cytosol [GO:0005829]; mitochondrion [GO:0005739]; nucleus [GO:0005634]	Acetylation; Complete proteome; Cytoplasm; Polymorphism; Reference proteome		FALSE	28467	28
NMNA3_HUMAN	TRUE	0.179522	1.13251	0.00984901	NMNAT3	NMNAT3 FKSG76	Nicotinamide/nicotinic acid mononucleotide adenylyltransferase 3	2.85219	2.88493	0.00851001	0.145902	0.136413	2.35568	20	0.0186794	0.0237702	0.0232338	252	mitochondrial matrix [GO:0005759]; mitochondrion [GO:0005739]; ATP binding [GO:0005524]; nicotinamide-nucleotide adenylyltransferase activity [GO:0000309]; nicotinate-nucleotide adenylyltransferase activity [GO:0004515]; 'de novo' NAD biosynthetic process from aspartate [GO:0034628]; NAD biosynthetic process [GO:0009435]; NAD metabolic process [GO:0019674]; response to wounding [GO:0009611]	mitochondrial matrix [GO:0005759]; mitochondrion [GO:0005739]; ATP binding [GO:0005524]; nicotinamide-nucleotide adenylyltransferase activity [GO:0000309]; nicotinate-nucleotide adenylyltransferase activity [GO:0004515]; 'de novo' NAD biosynthetic process from aspartate [GO:0034628]; NAD biosynthetic process [GO:0009435]; NAD metabolic process [GO:0019674]; response to wounding [GO:0009611]	mitochondrial matrix [GO:0005759]; mitochondrion [GO:0005739]; ATP binding [GO:0005524]; nicotinamide-nucleotide adenylyltransferase activity [GO:0000309]; nicotinate-nucleotide adenylyltransferase activity [GO:0004515]; 'de novo' NAD biosynthetic process from aspartate [GO:0034628]; NAD biosynthetic process [GO:0009435]; NAD metabolic process [GO:0019674]; response to wounding [GO:0009611]	3D-structure; ATP-binding; Alternative splicing; Complete proteome; Magnesium; Mitochondrion; NAD; Nucleotide-binding; Nucleotidyltransferase; Pyridine nucleotide biosynthesis; Reference proteome; Transferase	Catalyzes the formation of NAD(+) from nicotinamide mononucleotide (NMN) and ATP. Can also use the deamidated form; nicotinic acid mononucleotide (NaMN) as substrate with the same efficiency. Can use triazofurin monophosphate (TrMP) as substrate. Can also use GTP and ITP as nucleotide donors. Also catalyzes the reverse reaction, i.e. the pyrophosphorolytic cleavage of NAD(+). For the pyrophosphor…	Cofactor biosynthesis; NAD(+) biosynthesis; NAD(+) from nicotinamide D-ribonucleotide: step 1/1.; Cofactor biosynthesis; NAD(+) biosynthesis; deamido-NAD(+) from nicotinate D-ribonucleotide: step 1/1.	28322	28
NLTP_HUMAN	TRUE	0.175172	1.1291	0.000278537	SCP2	SCP2	Non-specific lipid-transfer protein	4.39642	4.18941	0.000369215	0.0978309	0.0962277	2.35568	20	0.0186794	0.00952537	0.01049	547	extracellular exosome [GO:0070062]; intracellular membrane-bounded organelle [GO:0043231]; membrane [GO:0016020]; mitochondrion [GO:0005739]; nucleoplasm [GO:0005654]; peroxisomal matrix [GO:0005782]; peroxisome [GO:0005777]; protein complex [GO:0043234]; cholesterol binding [GO:0015485]; fatty-acyl-CoA binding [GO:0000062]; long-chain fatty acyl-CoA binding [GO:0036042]; oleic acid binding [GO:0…	extracellular exosome [GO:0070062]; intracellular membrane-bounded organelle [GO:0043231]; membrane [GO:0016020]; mitochondrion [GO:0005739]; nucleoplasm [GO:0005654]; peroxisomal matrix [GO:0005782]; peroxisome [GO:0005777]; protein complex [GO:0043234]; cholesterol binding [GO:0015485]; fatty-acyl-CoA binding [GO:0000062]; long-chain fatty acyl-CoA binding [GO:0036042]; oleic acid binding [GO:0…	extracellular exosome [GO:0070062]; intracellular membrane-bounded organelle [GO:0043231]; membrane [GO:0016020]; mitochondrion [GO:0005739]; nucleoplasm [GO:0005654]; peroxisomal matrix [GO:0005782]; peroxisome [GO:0005777]; protein complex [GO:0043234]; cholesterol binding [GO:0015485]; fatty-acyl-CoA binding [GO:0000062]; long-chain fatty acyl-CoA binding [GO:0036042]; oleic acid binding [GO:0…	3D-structure; Acetylation; Acyltransferase; Alternative initiation; Alternative promoter usage; Alternative splicing; Complete proteome; Cytoplasm; Direct protein sequencing; Lipid transport; Lipid-binding; Mitochondrion; Peroxisome; Phosphoprotein; Polymorphism; Reference proteome; Transferase; Transport	Mediates in vitro the transfer of all common phospholipids, cholesterol and gangliosides between membranes. May play a role in regulating steroidogenesis. {ECO:0000269|PubMed:17157249, ECO:0000269|PubMed:8300590}.	FALSE	58994	59
NFU1_HUMAN	TRUE	0.198544	1.14754	0.00904964	NFU1	NFU1 HIRIP5 CGI-33	NFU1 iron-sulfur cluster scaffold homolog, mitochondrial	2.89021	2.94346	0.00743423	0.142242	0.132753	2.35568	20	0.0186794	0.0283145	0.0272992	254	cytosol [GO:0005829]; mitochondrion [GO:0005739]; nucleoplasm [GO:0005654]; nucleus [GO:0005634]; 4 iron, 4 sulfur cluster binding [GO:0051539]; iron ion binding [GO:0005506]; iron-sulfur cluster assembly [GO:0016226]	cytosol [GO:0005829]; mitochondrion [GO:0005739]; nucleoplasm [GO:0005654]; nucleus [GO:0005634]; 4 iron, 4 sulfur cluster binding [GO:0051539]; iron ion binding [GO:0005506]; iron-sulfur cluster assembly [GO:0016226]	cytosol [GO:0005829]; mitochondrion [GO:0005739]; nucleoplasm [GO:0005654]; nucleus [GO:0005634]; 4 iron, 4 sulfur cluster binding [GO:0051539]; iron ion binding [GO:0005506]; iron-sulfur cluster assembly [GO:0016226]	3D-structure; Alternative splicing; Complete proteome; Cytoplasm; Disease mutation; Iron; Iron-sulfur; Metal-binding; Mitochondrion; Polymorphism; Primary mitochondrial disease; Reference proteome; Transit peptide	Iron-sulfur cluster scaffold protein which can assemble [4Fe-2S] clusters and deliver them to target proteins. {ECO:0000269|PubMed:12886008, ECO:0000269|PubMed:27818104}.	FALSE	28463	28
NEUL2_HUMAN	TRUE	0.168104	1.12358	0.0330441	NEURL2	NEURL2 C20orf163	Neuralized-like protein 2	2.28971	2.34244	0.0284538	0.234145	0.218931	2.35568	20	0.0186794	0.0323404	0.0309009	285	cytoplasm [GO:0005737]; intracellular signal transduction [GO:0035556]; protein ubiquitination [GO:0016567]	cytoplasm [GO:0005737]; intracellular signal transduction [GO:0035556]; protein ubiquitination [GO:0016567]	cytoplasm [GO:0005737]; intracellular signal transduction [GO:0035556]; protein ubiquitination [GO:0016567]	Complete proteome; Cytoplasm; Polymorphism; Reference proteome; Ubl conjugation pathway	Plays an important role in the process of myofiber differentiation and maturation. Probable substrate-recognition component of a SCF-like ECS (Elongin BC-CUL2/5-SOCS-box protein) E3 ubiquitin-protein ligase complex, which mediates the ubiquitination of proteins. Probably contributes to catalysis through recognition and positioning of the substrate and the ubiquitin-conjugating enzyme. During myog…	Protein modification; protein ubiquitination.	31690	32
NDUS6_HUMAN	TRUE	0.115623	1.08344	0.0100002	NDUFS6	NDUFS6	NADH dehydrogenase [ubiquinone] iron-sulfur protein 6	2.84533	2.72123	0.0123622	0.147696	0.155949	2.35568	20	0.0186794	0.00990766	0.010832	124	mitochondrial inner membrane [GO:0005743]; mitochondrial respiratory chain complex I [GO:0005747]; electron carrier activity [GO:0009055]; NADH dehydrogenase (ubiquinone) activity [GO:0008137]; cardiovascular system development [GO:0072358]; fatty acid metabolic process [GO:0006631]; mitochondrial electron transport, NADH to ubiquinone [GO:0006120]; mitochondrial respiratory chain complex I assem…	mitochondrial inner membrane [GO:0005743]; mitochondrial respiratory chain complex I [GO:0005747]; electron carrier activity [GO:0009055]; NADH dehydrogenase (ubiquinone) activity [GO:0008137]; cardiovascular system development [GO:0072358]; fatty acid metabolic process [GO:0006631]; mitochondrial electron transport, NADH to ubiquinone [GO:0006120]; mitochondrial respiratory chain complex I assem…	mitochondrial inner membrane [GO:0005743]; mitochondrial respiratory chain complex I [GO:0005747]; electron carrier activity [GO:0009055]; NADH dehydrogenase (ubiquinone) activity [GO:0008137]; cardiovascular system development [GO:0072358]; fatty acid metabolic process [GO:0006631]; mitochondrial electron transport, NADH to ubiquinone [GO:0006120]; mitochondrial respiratory chain complex I assem…	Acetylation; Complete proteome; Electron transport; Membrane; Mitochondrion; Mitochondrion inner membrane; Reference proteome; Respiratory chain; Transit peptide; Transport	Accessory subunit of the mitochondrial membrane respiratory chain NADH dehydrogenase (Complex I), that is believed not to be involved in catalysis. Complex I functions in the transfer of electrons from NADH to the respiratory chain. The immediate electron acceptor for the enzyme is believed to be ubiquinone.	FALSE	13712	14
NDUBB_HUMAN	TRUE	0.169931	1.125	0.0104164	NDUFB11	NDUFB11 UNQ111/PRO1064	NADH dehydrogenase [ubiquinone] 1 beta subcomplex subunit 11	2.82695	2.8478	0.00926775	0.149345	0.141838	2.35568	20	0.0186794	0.02168	0.0213638	153	integral component of membrane [GO:0016021]; mitochondrial inner membrane [GO:0005743]; mitochondrial respiratory chain complex I [GO:0005747]; mitochondrial electron transport, NADH to ubiquinone [GO:0006120]; mitochondrial respiratory chain complex I assembly [GO:0032981]	integral component of membrane [GO:0016021]; mitochondrial inner membrane [GO:0005743]; mitochondrial respiratory chain complex I [GO:0005747]; mitochondrial electron transport, NADH to ubiquinone [GO:0006120]; mitochondrial respiratory chain complex I assembly [GO:0032981]	integral component of membrane [GO:0016021]; mitochondrial inner membrane [GO:0005743]; mitochondrial respiratory chain complex I [GO:0005747]; mitochondrial electron transport, NADH to ubiquinone [GO:0006120]; mitochondrial respiratory chain complex I assembly [GO:0032981]	Alternative splicing; Cardiomyopathy; Complete proteome; Electron transport; Membrane; Mitochondrion; Mitochondrion inner membrane; Polymorphism; Primary mitochondrial disease; Reference proteome; Respiratory chain; Transit peptide; Transmembrane; Transmembrane helix; Transport	Accessory subunit of the mitochondrial membrane respiratory chain NADH dehydrogenase (Complex I), that is believed not to be involved in catalysis. Complex I functions in the transfer of electrons from NADH to the respiratory chain. The immediate electron acceptor for the enzyme is believed to be ubiquinone.	FALSE	17317	17
NDUAB_HUMAN	TRUE	0.204415	1.15222	0.0345019	NDUFA11	NDUFA11	NADH dehydrogenase [ubiquinone] 1 alpha subcomplex subunit 11	2.26881	2.3463	0.0282198	0.238612	0.218178	2.35568	20	0.0186794	0.0487059	0.045542	141	integral component of membrane [GO:0016021]; mitochondrial inner membrane [GO:0005743]; mitochondrial respiratory chain complex I [GO:0005747]; mitochondrion [GO:0005739]; mitochondrial electron transport, NADH to ubiquinone [GO:0006120]; mitochondrial respiratory chain complex I assembly [GO:0032981]	integral component of membrane [GO:0016021]; mitochondrial inner membrane [GO:0005743]; mitochondrial respiratory chain complex I [GO:0005747]; mitochondrion [GO:0005739]; mitochondrial electron transport, NADH to ubiquinone [GO:0006120]; mitochondrial respiratory chain complex I assembly [GO:0032981]	integral component of membrane [GO:0016021]; mitochondrial inner membrane [GO:0005743]; mitochondrial respiratory chain complex I [GO:0005747]; mitochondrion [GO:0005739]; mitochondrial electron transport, NADH to ubiquinone [GO:0006120]; mitochondrial respiratory chain complex I assembly [GO:0032981]	Acetylation; Alternative splicing; Complete proteome; Direct protein sequencing; Electron transport; Membrane; Mitochondrion; Mitochondrion inner membrane; Primary mitochondrial disease; Reference proteome; Respiratory chain; Transmembrane; Transmembrane helix; Transport	Accessory subunit of the mitochondrial membrane respiratory chain NADH dehydrogenase (Complex I), that is believed not to be involved in catalysis. Complex I functions in the transfer of electrons from NADH to the respiratory chain. The immediate electron acceptor for the enzyme is believed to be ubiquinone (By similarity). {ECO:0000250}.	FALSE	14852	15
NBAS_HUMAN	TRUE	0.0539624	1.03811	0.0169213	NBAS	NBAS NAG	Neuroblastoma-amplified sequence	2.60558	2.02265	0.0552311	0.17674	0.286882	2.35568	20	0.0186794	0.0025735	0.00427062	2371	cytosol [GO:0005829]; Dsl1/NZR complex [GO:0070939]; endoplasmic reticulum [GO:0005783]; endoplasmic reticulum membrane [GO:0005789]; membrane [GO:0016020]; SNARE binding [GO:0000149]; negative regulation of nuclear-transcribed mRNA catabolic process, nonsense-mediated decay [GO:2000623]; nuclear-transcribed mRNA catabolic process [GO:0000956]; protein transport [GO:0015031]; retrograde vesicle-m…	cytosol [GO:0005829]; Dsl1/NZR complex [GO:0070939]; endoplasmic reticulum [GO:0005783]; endoplasmic reticulum membrane [GO:0005789]; membrane [GO:0016020]; SNARE binding [GO:0000149]; negative regulation of nuclear-transcribed mRNA catabolic process, nonsense-mediated decay [GO:2000623]; nuclear-transcribed mRNA catabolic process [GO:0000956]; protein transport [GO:0015031]; retrograde vesicle-m…	cytosol [GO:0005829]; Dsl1/NZR complex [GO:0070939]; endoplasmic reticulum [GO:0005783]; endoplasmic reticulum membrane [GO:0005789]; membrane [GO:0016020]; SNARE binding [GO:0000149]; negative regulation of nuclear-transcribed mRNA catabolic process, nonsense-mediated decay [GO:2000623]; nuclear-transcribed mRNA catabolic process [GO:0000956]; protein transport [GO:0015031]; retrograde vesicle-m…	Acetylation; Alternative splicing; Complete proteome; Cytoplasm; Disease mutation; Dwarfism; Endoplasmic reticulum; Membrane; Phosphoprotein; Polymorphism; Protein transport; Reference proteome; Repeat; Transport; WD repeat	Involved in Golgi-to-endoplasmic reticulum (ER) retrograde transport; the function is proposed to depend on its association in the NRZ complex which is believed to play a role in SNARE assembly at the ER (PubMed:19369418). {ECO:0000269|PubMed:19369418, ECO:0000305}.	FALSE	268571	269
MYO1E_HUMAN	TRUE	0.371439	1.29364	0.0206615	MYO1E	MYO1E MYO1C	Unconventional myosin-Ie	2.6332	2.80287	0.0131523	0.188829	0.15898	2.35568	13	0.0186794	0.0795916	0.0702472	1108	actin cytoskeleton [GO:0015629]; adherens junction [GO:0005912]; brush border [GO:0005903]; cell-cell junction [GO:0005911]; clathrin-coated vesicle [GO:0030136]; cytoplasm [GO:0005737]; cytoskeleton [GO:0005856]; extracellular exosome [GO:0070062]; myosin complex [GO:0016459]; actin filament binding [GO:0051015]; ATP binding [GO:0005524]; ATPase activity, coupled [GO:0042623]; calmodulin binding…	actin cytoskeleton [GO:0015629]; adherens junction [GO:0005912]; brush border [GO:0005903]; cell-cell junction [GO:0005911]; clathrin-coated vesicle [GO:0030136]; cytoplasm [GO:0005737]; cytoskeleton [GO:0005856]; extracellular exosome [GO:0070062]; myosin complex [GO:0016459]; actin filament binding [GO:0051015]; ATP binding [GO:0005524]; ATPase activity, coupled [GO:0042623]; calmodulin binding…	actin cytoskeleton [GO:0015629]; adherens junction [GO:0005912]; brush border [GO:0005903]; cell-cell junction [GO:0005911]; clathrin-coated vesicle [GO:0030136]; cytoplasm [GO:0005737]; cytoskeleton [GO:0005856]; extracellular exosome [GO:0070062]; myosin complex [GO:0016459]; actin filament binding [GO:0051015]; ATP binding [GO:0005524]; ATPase activity, coupled [GO:0042623]; calmodulin binding…	ATP-binding; Actin-binding; Calmodulin-binding; Cell junction; Complete proteome; Cytoplasm; Cytoplasmic vesicle; Cytoskeleton; Disease mutation; Lipid-binding; Motor protein; Myosin; Nucleotide-binding; Phosphoprotein; Polymorphism; Reference proteome; SH3 domain	Myosins are actin-based motor molecules with ATPase activity. Unconventional myosins serve in intracellular movements. Their highly divergent tails bind to membranous compartments, which are then moved relative to actin filaments. Binds to membranes containing anionic phospholipids via its tail domain. Required for normal morphology of the glomerular basement membrane, normal development of foot …	FALSE	127062	127
MYO1B_HUMAN	TRUE	0.0799027	1.05695	0.0475064	MYO1B	MYO1B	Unconventional myosin-Ib	2.11155	1.99192	0.0587338	0.272684	0.291826	2.35568	20	0.0186794	0.00859158	0.00965456	1136	actin filament [GO:0005884]; apical part of cell [GO:0045177]; brush border [GO:0005903]; cell periphery [GO:0071944]; cytoplasm [GO:0005737]; early endosome [GO:0005769]; endosome membrane [GO:0010008]; extracellular exosome [GO:0070062]; filopodium [GO:0030175]; myosin complex [GO:0016459]; perinuclear region of cytoplasm [GO:0048471]; plasma membrane [GO:0005886]; actin filament binding [GO:00…	actin filament [GO:0005884]; apical part of cell [GO:0045177]; brush border [GO:0005903]; cell periphery [GO:0071944]; cytoplasm [GO:0005737]; early endosome [GO:0005769]; endosome membrane [GO:0010008]; extracellular exosome [GO:0070062]; filopodium [GO:0030175]; myosin complex [GO:0016459]; perinuclear region of cytoplasm [GO:0048471]; plasma membrane [GO:0005886]; actin filament binding [GO:00…	actin filament [GO:0005884]; apical part of cell [GO:0045177]; brush border [GO:0005903]; cell periphery [GO:0071944]; cytoplasm [GO:0005737]; early endosome [GO:0005769]; endosome membrane [GO:0010008]; extracellular exosome [GO:0070062]; filopodium [GO:0030175]; myosin complex [GO:0016459]; perinuclear region of cytoplasm [GO:0048471]; plasma membrane [GO:0005886]; actin filament binding [GO:00…	ATP-binding; Actin-binding; Alternative splicing; Calmodulin-binding; Complete proteome; Isopeptide bond; Motor protein; Myosin; Nucleotide-binding; Phosphoprotein; Polymorphism; Reference proteome; Repeat; Ubl conjugation	Motor protein that may participate in process critical to neuronal development and function such as cell migration, neurite outgrowth and vesicular transport. {ECO:0000250}.	FALSE	131985	132
MYH15_HUMAN	TRUE	0.177572	1.13098	0.0208351	MYH15	MYH15 KIAA1000	Myosin-15	2.50887	2.56045	0.0177094	0.189541	0.178539	2.35568	20	0.0186794	0.030057	0.0288582	1946	myofibril [GO:0030016]; myosin filament [GO:0032982]; actin binding [GO:0003779]; ATP binding [GO:0005524]; calmodulin binding [GO:0005516]; motor activity [GO:0003774]; extraocular skeletal muscle development [GO:0002074]	myofibril [GO:0030016]; myosin filament [GO:0032982]; actin binding [GO:0003779]; ATP binding [GO:0005524]; calmodulin binding [GO:0005516]; motor activity [GO:0003774]; extraocular skeletal muscle development [GO:0002074]	myofibril [GO:0030016]; myosin filament [GO:0032982]; actin binding [GO:0003779]; ATP binding [GO:0005524]; calmodulin binding [GO:0005516]; motor activity [GO:0003774]; extraocular skeletal muscle development [GO:0002074]	ATP-binding; Actin-binding; Calmodulin-binding; Coiled coil; Complete proteome; Cytoplasm; Isopeptide bond; Methylation; Motor protein; Muscle protein; Myosin; Nucleotide-binding; Phosphoprotein; Polymorphism; Reference proteome; Thick filament; Ubl conjugation	Muscle contraction. {ECO:0000250}.	FALSE	224619	225
MTX2_HUMAN	TRUE	0.096854	1.06944	0.0182243	MTX2	MTX2	Metaxin-2	2.57124	2.42329	0.0239106	0.182369	0.202752	2.35568	20	0.0186794	0.00851339	0.00958461	263	mitochondrial outer membrane [GO:0005741]; mitochondrion [GO:0005739]; nucleolus [GO:0005730]; mitochondrial transport [GO:0006839]; protein targeting to mitochondrion [GO:0006626]	mitochondrial outer membrane [GO:0005741]; mitochondrion [GO:0005739]; nucleolus [GO:0005730]; mitochondrial transport [GO:0006839]; protein targeting to mitochondrion [GO:0006626]	mitochondrial outer membrane [GO:0005741]; mitochondrion [GO:0005739]; nucleolus [GO:0005730]; mitochondrial transport [GO:0006839]; protein targeting to mitochondrion [GO:0006626]	Acetylation; Alternative splicing; Complete proteome; Membrane; Mitochondrion; Mitochondrion outer membrane; Protein transport; Reference proteome; Transport	Involved in transport of proteins into the mitochondrion. {ECO:0000269|PubMed:10381257}.	FALSE	29763	30
MTEF3_HUMAN	TRUE	0.185603	1.13729	0.0050981	MTERF3	NA	NA	3.14486	3.1626	0.00445241	0.131969	0.11628	2.35568	20	0.0186794	0.0208987	0.0206648	NA	NA	NA	NA	NA	NA	NA	NA	NA
MTCH2_HUMAN	TRUE	0.124087	1.08982	0.0218005	MTCH2	MTCH2 MIMP HSPC032	Mitochondrial carrier homolog 2	2.48765	2.45536	0.0223023	0.194694	0.195963	2.35568	20	0.0186794	0.0149289	0.0153241	303	extracellular exosome [GO:0070062]; integral component of membrane [GO:0016021]; membrane [GO:0016020]; mitochondrial inner membrane [GO:0005743]; mitochondrial outer membrane [GO:0005741]; mitochondrion [GO:0005739]; nucleus [GO:0005634]; cellular response to radiation [GO:0071478]; establishment of protein localization to mitochondrial membrane involved in mitochondrial fission [GO:0090152]; he…	extracellular exosome [GO:0070062]; integral component of membrane [GO:0016021]; membrane [GO:0016020]; mitochondrial inner membrane [GO:0005743]; mitochondrial outer membrane [GO:0005741]; mitochondrion [GO:0005739]; nucleus [GO:0005634]; cellular response to radiation [GO:0071478]; establishment of protein localization to mitochondrial membrane involved in mitochondrial fission [GO:0090152]; he…	extracellular exosome [GO:0070062]; integral component of membrane [GO:0016021]; membrane [GO:0016020]; mitochondrial inner membrane [GO:0005743]; mitochondrial outer membrane [GO:0005741]; mitochondrion [GO:0005739]; nucleus [GO:0005634]; cellular response to radiation [GO:0071478]; establishment of protein localization to mitochondrial membrane involved in mitochondrial fission [GO:0090152]; he…	Acetylation; Complete proteome; Direct protein sequencing; Membrane; Mitochondrion; Mitochondrion inner membrane; Polymorphism; Reference proteome; Repeat; Transmembrane; Transmembrane helix; Transport	The substrate transported is not yet known. Induces mitochondrial depolarization.	FALSE	33331	33
MSS51_HUMAN	TRUE	0.346692	1.27164	0.0492041	MSS51	NA	NA	2.45873	2.66607	0.0274733	0.277193	0.216521	2.35568	6	0.0186794	0.0397646	0.0338201	NA	NA	NA	NA	NA	NA	NA	NA	NA
MSRB2_HUMAN	TRUE	0.156271	1.1144	0.0226941	MSRB2	MSRB2 CBS-1 MSRB CGI-131	Methionine-R-sulfoxide reductase B2, mitochondrial	2.46878	2.49831	0.0203056	0.198864	0.189283	2.35568	20	0.0186794	0.0240405	0.0234756	182	cytosol [GO:0005829]; mitochondrion [GO:0005739]; actin binding [GO:0003779]; peptide-methionine (R)-S-oxide reductase activity [GO:0033743]; transcription factor activity, sequence-specific DNA binding [GO:0003700]; zinc ion binding [GO:0008270]; actin filament polymerization [GO:0030041]; protein repair [GO:0030091]; response to oxidative stress [GO:0006979]	cytosol [GO:0005829]; mitochondrion [GO:0005739]; actin binding [GO:0003779]; peptide-methionine (R)-S-oxide reductase activity [GO:0033743]; transcription factor activity, sequence-specific DNA binding [GO:0003700]; zinc ion binding [GO:0008270]; actin filament polymerization [GO:0030041]; protein repair [GO:0030091]; response to oxidative stress [GO:0006979]	cytosol [GO:0005829]; mitochondrion [GO:0005739]; actin binding [GO:0003779]; peptide-methionine (R)-S-oxide reductase activity [GO:0033743]; transcription factor activity, sequence-specific DNA binding [GO:0003700]; zinc ion binding [GO:0008270]; actin filament polymerization [GO:0030041]; protein repair [GO:0030091]; response to oxidative stress [GO:0006979]	Complete proteome; Metal-binding; Mitochondrion; Oxidoreductase; Polymorphism; Reference proteome; Transit peptide; Zinc	Methionine-sulfoxide reductase that specifically reduces methionine (R)-sulfoxide back to methionine. While in many cases, methionine oxidation is the result of random oxidation following oxidative stress, methionine oxidation is also a post-translational modification that takes place on specific residue. Upon oxidative stress, may play a role in the preservation of mitochondrial integrity by dec…	FALSE	19536	20
MPPA_HUMAN	TRUE	0.120332	1.08699	0.0121018	PMPCA	PMPCA INPP5E KIAA0123 MPPA	Mitochondrial-processing peptidase subunit alpha	2.75909	2.67094	0.0138446	0.157154	0.161693	2.35568	20	0.0186794	0.0114125	0.0121783	525	extracellular space [GO:0005615]; mitochondrial inner membrane [GO:0005743]; mitochondrial matrix [GO:0005759]; mitochondrion [GO:0005739]; metalloendopeptidase activity [GO:0004222]; zinc ion binding [GO:0008270]; protein processing involved in protein targeting to mitochondrion [GO:0006627]; proteolysis [GO:0006508]	extracellular space [GO:0005615]; mitochondrial inner membrane [GO:0005743]; mitochondrial matrix [GO:0005759]; mitochondrion [GO:0005739]; metalloendopeptidase activity [GO:0004222]; zinc ion binding [GO:0008270]; protein processing involved in protein targeting to mitochondrion [GO:0006627]; proteolysis [GO:0006508]	extracellular space [GO:0005615]; mitochondrial inner membrane [GO:0005743]; mitochondrial matrix [GO:0005759]; mitochondrion [GO:0005739]; metalloendopeptidase activity [GO:0004222]; zinc ion binding [GO:0008270]; protein processing involved in protein targeting to mitochondrion [GO:0006627]; proteolysis [GO:0006508]	Acetylation; Alternative splicing; Complete proteome; Disease mutation; Hydrolase; Membrane; Mental retardation; Metalloprotease; Mitochondrion; Mitochondrion inner membrane; Neurodegeneration; Protease; Reference proteome; Transit peptide	Cleaves presequences (transit peptides) from mitochondrial protein precursors. {ECO:0000269|PubMed:25808372}.	FALSE	58253	58
MOCS1_HUMAN	TRUE	0.178074	1.13137	0.0168333	MOCS1	NA	NA	2.60799	2.65488	0.0143523	0.17674	0.163429	2.35568	20	0.0186794	0.027973	0.0269937	NA	NA	NA	NA	NA	NA	NA	NA	NA
MIRO2_HUMAN	TRUE	0.13744	1.09995	0.014451	RHOT2	RHOT2 ARHT2 C16orf39	Mitochondrial Rho GTPase 2	2.67818	2.65284	0.0144178	0.167912	0.163429	2.35568	20	0.0186794	0.0158016	0.0161048	618	cytosol [GO:0005829]; extracellular exosome [GO:0070062]; integral component of mitochondrial outer membrane [GO:0031307]; membrane [GO:0016020]; plasma membrane [GO:0005886]; calcium ion binding [GO:0005509]; GTP binding [GO:0005525]; GTPase activity [GO:0003924]; cellular homeostasis [GO:0019725]; mitochondrial outer membrane permeabilization [GO:0097345]; mitochondrion transport along microtub…	cytosol [GO:0005829]; extracellular exosome [GO:0070062]; integral component of mitochondrial outer membrane [GO:0031307]; membrane [GO:0016020]; plasma membrane [GO:0005886]; calcium ion binding [GO:0005509]; GTP binding [GO:0005525]; GTPase activity [GO:0003924]; cellular homeostasis [GO:0019725]; mitochondrial outer membrane permeabilization [GO:0097345]; mitochondrion transport along microtub…	cytosol [GO:0005829]; extracellular exosome [GO:0070062]; integral component of mitochondrial outer membrane [GO:0031307]; membrane [GO:0016020]; plasma membrane [GO:0005886]; calcium ion binding [GO:0005509]; GTP binding [GO:0005525]; GTPase activity [GO:0003924]; cellular homeostasis [GO:0019725]; mitochondrial outer membrane permeabilization [GO:0097345]; mitochondrion transport along microtub…	3D-structure; Alternative splicing; Calcium; Complete proteome; GTP-binding; Hydrolase; Membrane; Metal-binding; Mitochondrion; Mitochondrion outer membrane; Nucleotide-binding; Polymorphism; Reference proteome; Repeat; Transmembrane; Transmembrane helix	Mitochondrial GTPase involved in mitochondrial trafficking. Probably involved in control of anterograde transport of mitochondria and their subcellular distribution (By similarity). {ECO:0000250, ECO:0000269|PubMed:16630562}.	FALSE	68118	68
MIEN1_HUMAN	TRUE	0.216648	1.16203	0.00150117	MIEN1	MIEN1 C17orf37 RDX12 XTP4	Migration and invasion enhancer 1	3.67528	3.6956	0.00123783	0.112467	0.108611	2.35568	20	0.0186794	0.0208487	0.0206202	115	cytosol [GO:0005829]; extracellular exosome [GO:0070062]; intrinsic component of the cytoplasmic side of the plasma membrane [GO:0031235]; apoptotic process [GO:0006915]; negative regulation of apoptotic process [GO:0043066]; positive regulation of cell migration [GO:0030335]; positive regulation of filopodium assembly [GO:0051491]	cytosol [GO:0005829]; extracellular exosome [GO:0070062]; intrinsic component of the cytoplasmic side of the plasma membrane [GO:0031235]; apoptotic process [GO:0006915]; negative regulation of apoptotic process [GO:0043066]; positive regulation of cell migration [GO:0030335]; positive regulation of filopodium assembly [GO:0051491]	cytosol [GO:0005829]; extracellular exosome [GO:0070062]; intrinsic component of the cytoplasmic side of the plasma membrane [GO:0031235]; apoptotic process [GO:0006915]; negative regulation of apoptotic process [GO:0043066]; positive regulation of cell migration [GO:0030335]; positive regulation of filopodium assembly [GO:0051491]	3D-structure; Acetylation; Apoptosis; Cell membrane; Complete proteome; Cytoplasm; Disulfide bond; Lipoprotein; Membrane; Prenylation; Redox-active center; Reference proteome	Increases cell migration by inducing filopodia formation at the leading edge of migrating cells. Plays a role in regulation of apoptosis, possibly through control of CASP3. May be involved in a redox-related process. {ECO:0000269|PubMed:19503095, ECO:0000269|PubMed:21628459}.	FALSE	12403	12
MFN2_HUMAN	TRUE	0.111848	1.08061	0.0435024	MFN2	MFN2 CPRP1 KIAA0214	Mitofusin-2	2.15529	2.13778	0.0437092	0.263318	0.262414	2.35568	20	0.0186794	0.0161583	0.016424	757	cytosol [GO:0005829]; integral component of membrane [GO:0016021]; intrinsic component of mitochondrial outer membrane [GO:0031306]; microtubule cytoskeleton [GO:0015630]; mitochondrial outer membrane [GO:0005741]; mitochondrion [GO:0005739]; GTP binding [GO:0005525]; GTPase activity [GO:0003924]; ubiquitin protein ligase binding [GO:0031625]; apoptotic process [GO:0006915]; blastocyst formation …	cytosol [GO:0005829]; integral component of membrane [GO:0016021]; intrinsic component of mitochondrial outer membrane [GO:0031306]; microtubule cytoskeleton [GO:0015630]; mitochondrial outer membrane [GO:0005741]; mitochondrion [GO:0005739]; GTP binding [GO:0005525]; GTPase activity [GO:0003924]; ubiquitin protein ligase binding [GO:0031625]; apoptotic process [GO:0006915]; blastocyst formation …	cytosol [GO:0005829]; integral component of membrane [GO:0016021]; intrinsic component of mitochondrial outer membrane [GO:0031306]; microtubule cytoskeleton [GO:0015630]; mitochondrial outer membrane [GO:0005741]; mitochondrion [GO:0005739]; GTP binding [GO:0005525]; GTPase activity [GO:0003924]; ubiquitin protein ligase binding [GO:0031625]; apoptotic process [GO:0006915]; blastocyst formation …	Alternative splicing; Apoptosis; Autophagy; Charcot-Marie-Tooth disease; Coiled coil; Complete proteome; Disease mutation; GTP-binding; Hydrolase; Membrane; Mitochondrion; Mitochondrion outer membrane; Neurodegeneration; Neuropathy; Nucleotide-binding; Phosphoprotein; Reference proteome; Transmembrane; Transmembrane helix; Ubl conjugation; Unfolded protein response	Mitochondrial outer membrane GTPase that mediates mitochondrial clustering and fusion (PubMed:11181170, PubMed:11950885, PubMed:28114303). Mitochondria are highly dynamic organelles, and their morphology is determined by the equilibrium between mitochondrial fusion and fission events (PubMed:28114303). Overexpression induces the formation of mitochondrial networks (PubMed:28114303). Membrane clus…	FALSE	86402	86
MAVS_HUMAN	TRUE	0.0745331	1.05302	0.0190086	MAVS	MAVS IPS1 KIAA1271 VISA	Mitochondrial antiviral-signaling protein	2.55166	2.25615	0.0341675	0.183709	0.233654	2.35568	20	0.0186794	0.00511921	0.00654808	540	integral component of membrane [GO:0016021]; mitochondrial membrane [GO:0031966]; mitochondrial outer membrane [GO:0005741]; mitochondrion [GO:0005739]; peroxisomal membrane [GO:0005778]; CARD domain binding [GO:0050700]; protein kinase binding [GO:0019901]; signal transducer activity [GO:0004871]; activation of innate immune response [GO:0002218]; cellular response to exogenous dsRNA [GO:0071360…	integral component of membrane [GO:0016021]; mitochondrial membrane [GO:0031966]; mitochondrial outer membrane [GO:0005741]; mitochondrion [GO:0005739]; peroxisomal membrane [GO:0005778]; CARD domain binding [GO:0050700]; protein kinase binding [GO:0019901]; signal transducer activity [GO:0004871]; activation of innate immune response [GO:0002218]; cellular response to exogenous dsRNA [GO:0071360…	integral component of membrane [GO:0016021]; mitochondrial membrane [GO:0031966]; mitochondrial outer membrane [GO:0005741]; mitochondrion [GO:0005739]; peroxisomal membrane [GO:0005778]; CARD domain binding [GO:0050700]; protein kinase binding [GO:0019901]; signal transducer activity [GO:0004871]; activation of innate immune response [GO:0002218]; cellular response to exogenous dsRNA [GO:0071360…	3D-structure; Alternative splicing; Antiviral defense; Complete proteome; Host-virus interaction; Immunity; Innate immunity; Membrane; Methylation; Mitochondrion; Mitochondrion outer membrane; Peroxisome; Phosphoprotein; Polymorphism; Reference proteome; Transmembrane; Transmembrane helix; Ubl conjugation	Required for innate immune defense against viruses. Acts downstream of DDX58/RIG-I and IFIH1/MDA5, which detect intracellular dsRNA produced during viral replication, to coordinate pathways leading to the activation of NF-kappa-B, IRF3 and IRF7, and to the subsequent induction of antiviral cytokines such as IFN-beta and RANTES (CCL5). Peroxisomal and mitochondrial MAVS act sequentially to create …	FALSE	56528	57
MARC2_HUMAN	TRUE	0.210838	1.15736	0.00897696	43526	MARC2 MOSC2	Mitochondrial amidoxime reducing component 2	2.89382	2.95901	0.00717116	0.142242	0.132097	2.35568	20	0.0186794	0.0318497	0.0304619	335	extracellular exosome [GO:0070062]; mitochondrial inner membrane [GO:0005743]; mitochondrial outer membrane [GO:0005741]; mitochondrion [GO:0005739]; peroxisome [GO:0005777]; molybdenum ion binding [GO:0030151]; molybdopterin cofactor binding [GO:0043546]; nitrate reductase activity [GO:0008940]; pyridoxal phosphate binding [GO:0030170]; detoxification of nitrogen compound [GO:0051410]; nitrate m…	extracellular exosome [GO:0070062]; mitochondrial inner membrane [GO:0005743]; mitochondrial outer membrane [GO:0005741]; mitochondrion [GO:0005739]; peroxisome [GO:0005777]; molybdenum ion binding [GO:0030151]; molybdopterin cofactor binding [GO:0043546]; nitrate reductase activity [GO:0008940]; pyridoxal phosphate binding [GO:0030170]; detoxification of nitrogen compound [GO:0051410]; nitrate m…	extracellular exosome [GO:0070062]; mitochondrial inner membrane [GO:0005743]; mitochondrial outer membrane [GO:0005741]; mitochondrion [GO:0005739]; peroxisome [GO:0005777]; molybdenum ion binding [GO:0030151]; molybdopterin cofactor binding [GO:0043546]; nitrate reductase activity [GO:0008940]; pyridoxal phosphate binding [GO:0030170]; detoxification of nitrogen compound [GO:0051410]; nitrate m…	Acetylation; Alternative splicing; Complete proteome; Isopeptide bond; Membrane; Mitochondrion; Mitochondrion outer membrane; Molybdenum; Oxidoreductase; Peroxisome; Polymorphism; Reference proteome; Transit peptide; Ubl conjugation	As a component of the benzamidoxime prodrug-converting complex required to reduce N-hydroxylated prodrugs, such as benzamidoxime. Also able to reduce N(omega)-hydroxy-L-arginine (NOHA) and N(omega)-hydroxy-N(delta)-methyl-L-arginine (NHAM) into L-arginine and N(delta)-methyl-L-arginine, respectively. {ECO:0000269|PubMed:21029045}.	FALSE	38023	38
MAON_HUMAN	TRUE	0.238955	1.18014	0.00188053	ME3	ME3	NADP-dependent malic enzyme, mitochondrial	3.57835	3.63666	0.00142852	0.112467	0.108611	2.35568	20	0.0186794	0.0267557	0.0259047	604	mitochondrial matrix [GO:0005759]; mitochondrion [GO:0005739]; cofactor binding [GO:0048037]; malate dehydrogenase (decarboxylating) (NAD+) activity [GO:0004471]; malate dehydrogenase (decarboxylating) (NADP+) activity [GO:0004473]; malic enzyme activity [GO:0004470]; metal ion binding [GO:0046872]; NAD binding [GO:0051287]; oxaloacetate decarboxylase activity [GO:0008948]; aerobic respiration [G…	mitochondrial matrix [GO:0005759]; mitochondrion [GO:0005739]; cofactor binding [GO:0048037]; malate dehydrogenase (decarboxylating) (NAD+) activity [GO:0004471]; malate dehydrogenase (decarboxylating) (NADP+) activity [GO:0004473]; malic enzyme activity [GO:0004470]; metal ion binding [GO:0046872]; NAD binding [GO:0051287]; oxaloacetate decarboxylase activity [GO:0008948]; aerobic respiration [G…	mitochondrial matrix [GO:0005759]; mitochondrion [GO:0005739]; cofactor binding [GO:0048037]; malate dehydrogenase (decarboxylating) (NAD+) activity [GO:0004471]; malate dehydrogenase (decarboxylating) (NADP+) activity [GO:0004473]; malic enzyme activity [GO:0004470]; metal ion binding [GO:0046872]; NAD binding [GO:0051287]; oxaloacetate decarboxylase activity [GO:0008948]; aerobic respiration [G…	Alternative splicing; Complete proteome; Metal-binding; Mitochondrion; NADP; Oxidoreductase; Polymorphism; Reference proteome; Transit peptide		FALSE	67068	67
[truncated: 138 more rows]
